# Supplementary material
Source: publisher figshare collection journal article supplement (https://plos.figshare.com/articles/dataset/_/5978128)
Supplement: Supplementary file 1 [file 1]

Archive with 12 entries (12 files):
- S1 Fig.pdf
- S1 File.pdf
- S2 File.pdf
- S3 File.xlsm
- S4 File.xlsm
- S5 File.zip
- S1 Table.pdf
- S2 Table.pdf
- S3 Table.pdf
- S4 Table.pdf
- S5 Table.pdf
- S6 Table.pdf
