# Supplementary material
Source: publisher figshare collection journal article supplement (https://plos.figshare.com/articles/dataset/_/5978128)
Supplement: Supplementary file 1 [file 1 › S1 Table.pdf]

## S4 Results of database searches

| Database         | Hits  | After exclusion of duplicates |
|------------------|-------|-------------------------------|
| Embase.com       | 2913  | 2854                          |
| Medline (OvidSP) | 2887  | 682                           |
| Web-of-science   | 1224  | 478                           |
| Scopus           | 3339  | 660                           |
| CINAHL           | 282   | 126                           |
| PubMed publisher | 175   | 150                           |
| Cochrane         | 60    | 7                             |
| Popline          | 176   | 147                           |
| Lilacs           | 257   | 100                           |
| Scielo           | 36    | 26                            |
| Google Scholar   | 100   | 87                            |
| Total            | 11449 | 5316                          |
