# Supplementary material
Source: publisher figshare collection journal article supplement (https://plos.figshare.com/articles/dataset/_/5978128)
Supplement: Supplementary file 1 [file 1 › S2 Table.pdf]

|                                                                 | <b>Human African<br/>Trypanosomiasis</b> | <b>Chagas<br/>Disease</b> | <b>Visceral<br/>Leishmaniasis</b> | <b>Leprosy</b> |
|-----------------------------------------------------------------|------------------------------------------|---------------------------|-----------------------------------|----------------|
| <b>Papers screened on title and abstract</b>                    | 95                                       | 355                       | 497                               | 709            |
| <b>Assessed full text</b>                                       | 25                                       | 95                        | 54                                | 97             |
| <b>Studies with quantitative data on productivity losses</b>    | 3                                        | 12                        | 10                                | 4              |
| <b>Studies with quantitative data on out-of-pocket payments</b> | 1                                        | 19                        | 14                                | 6              |
