# Supplementary material
Source: publisher figshare collection journal article supplement (https://plos.figshare.com/articles/dataset/_/5978128)
Supplement: Supplementary file 1 [file 1 › S3 File.xlsm]

## Sheet: Read me
Explanation of this workbook UPDATE 1.1
This workbook calculates the age and sex specific burden of prevalent sequelae of NTDs.
How to use:
1. Decide whether you want to calculate the intervention scenario or the baseline scenario. For the intervention scenario, choose '1' at the place 'scenario' in the 'Assumptions' sheet. For the baseline scenario, fill in '2' at this
For intervention scenarios, also do this:
2. In the assumptions sheet you would need to make assumptions on when the hiostoric interventions started (possible values: 1990-2009). Fill in the desired value in row one, at "STARTYEAR INTERVENTION"
3. In the assumptions sheet you need to make assumptions on the desired endpoint (defined as a fraction of the burden in 2010) and the desired year at which this end-point is first achieved
For both 2 and 3, you can type in values in row one, and these will then apply for both sexes and all countries. However, it is also possible to make country specific assumptions, these are filled in at columns AR, AS, and AT.
3. Import the burden of sequalae from the burden of disease prevalence estimates for 1990 (into sheet 'burden_1990') and for 2010 (into burden_2010). Make sure that you sort the countries in the GBD database alphabetically and that you only select the sequala of interest! You have to paste the complete data into this excel sheet.
IMPORTANT! There are some countries in the GBD prevalence database that are not in the population database. Therefore, you need to delete these before importing the burden. The countries are:
Andorra
Dominica
Marshall Islands
Taiwan
Delete the countries when you have sorted them in alphabetic order as follows: Select the entire row by right-clicking on the row number, and then click 'delete'
Done! Your results are given in the sheet 'TOTAL PREVALENCE 1990-2030
Note
All the other sheets that perform calculations are hidden. To unhide sheets, right click on the sheets-bar below, and click on 'Unhide'

## Sheet: Total cases 15-65
	1990	1991	1992	1993	1994	1995	1996	1997	1998	1999	2000	2001	2002	2003	2004	2005	2006	2007	2008	2009	2010	2011	2012	2013	2014	2015	2016	2017	2018	2019	2020	2021	2022	2023	2024	2025	2026	2027	2028	2029	2030
WORLD
Men	2.13452e+06	2.19668e+06	2.26445e+06	2.33636e+06	2.41087e+06	2.48708e+06	2.55246e+06	2.62037e+06	2.69159e+06	2.76695e+06	2.84698e+06	2.92203e+06	3.00305e+06	3.08957e+06	3.1813e+06	3.27801e+06	3.36979e+06	3.46848e+06	3.57332e+06	3.68328e+06	3.79777e+06	3.90746e+06	4.02261e+06	4.14332e+06	4.27008e+06	4.40309e+06	4.53074e+06	4.66614e+06	4.80849e+06	4.95673e+06	5.11025e+06	5.25908e+06	5.41428e+06	5.57575e+06	5.74357e+06	5.9176e+06	6.08623e+06	6.26208e+06	6.44458e+06	6.63295e+06	6.82661e+06
Women	1.79566e+06	1.84717e+06	1.90339e+06	1.96291e+06	2.02426e+06	2.08656e+06	2.13971e+06	2.19455e+06	2.25189e+06	2.3126e+06	2.37725e+06	2.4385e+06	2.50483e+06	2.57578e+06	2.65099e+06	2.7302e+06	2.80597e+06	2.88731e+06	2.97355e+06	3.06384e+06	3.15767e+06	3.24792e+06	3.34252e+06	3.44151e+06	3.54524e+06	3.65385e+06	3.75881e+06	3.86993e+06	3.98656e+06	4.10787e+06	4.23336e+06	4.3557e+06	4.48314e+06	4.61557e+06	4.75306e+06	4.89545e+06	5.03443e+06	5.1792e+06	5.32924e+06	5.48393e+06	5.64278e+06
Total	3.93019e+06	4.04384e+06	4.16783e+06	4.29927e+06	4.43513e+06	4.57365e+06	4.69217e+06	4.81492e+06	4.94348e+06	5.07956e+06	5.22423e+06	5.36054e+06	5.50788e+06	5.66535e+06	5.83228e+06	6.0082e+06	6.17575e+06	6.35579e+06	6.54687e+06	6.74712e+06	6.95543e+06	7.15538e+06	7.36513e+06	7.58484e+06	7.81533e+06	8.05694e+06	8.28955e+06	8.53607e+06	8.79505e+06	9.0646e+06	9.34361e+06	9.61478e+06	9.89741e+06	1.01913e+07	1.04966e+07	1.08131e+07	1.11207e+07	1.14413e+07	1.17738e+07	1.21169e+07	1.24694e+07
MEN
Afghanistan	0	0	0	0	0	0	0	0	0	0	0	0	0	0	0	0	0	0	0	0	0	0	0	0	0	0	0	0	0	0	0	0	0	0	0	0	0	0	0	0	0
Albania	0	0	0	0	0	0	0	0	0	0	0	0	0	0	0	0	0	0	0	0	0	0	0	0	0	0	0	0	0	0	0	0	0	0	0	0	0	0	0	0	0
Algeria	0	0	0	0	0	0	0	0	0	0	0	0	0	0	0	0	0	0	0	0	0	0	0	0	0	0	0	0	0	0	0	0	0	0	0	0	0	0	0	0	0
Angola	9743.76	10004.9	10315.6	10661.3	11023.6	11392.2	11689.9	12000.5	12334.7	12705.4	13119	13520.8	13977	14475.9	15004.5	15554.9	16061.1	16598.2	17166.2	17768.2	18407.3	19011	19667.9	20372.2	21114.9	21891.5	22663.4	23465.6	24305	25192.3	26130.2	27023.4	27977.2	28981.1	30018.4	31080	32102.8	33160.6	34252.9	35383.5	36553.9
Antigua and Barbuda	0	0	0	0	0	0	0	0	0	0	0	0	0	0	0	0	0	0	0	0	0	0	0	0	0	0	0	0	0	0	0	0	0	0	0	0	0	0	0	0	0
Argentina	0	0	0	0	0	0	0	0	0	0	0	0	0	0	0	0	0	0	0	0	0	0	0	0	0	0	0	0	0	0	0	0	0	0	0	0	0	0	0	0	0
Armenia	0	0	0	0	0	0	0	0	0	0	0	0	0	0	0	0	0	0	0	0	0	0	0	0	0	0	0	0	0	0	0	0	0	0	0	0	0	0	0	0	0
Australia	0	0	0	0	0	0	0	0	0	0	0	0	0	0	0	0	0	0	0	0	0	0	0	0	0	0	0	0	0	0	0	0	0	0	0	0	0	0	0	0	0
Austria	0	0	0	0	0	0	0	0	0	0	0	0	0	0	0	0	0	0	0	0	0	0	0	0	0	0	0	0	0	0	0	0	0	0	0	0	0	0	0	0	0
Azerbaijan	0	0	0	0	0	0	0	0	0	0	0	0	0	0	0	0	0	0	0	0	0	0	0	0	0	0	0	0	0	0	0	0	0	0	0	0	0	0	0	0	0
Bahrain	0	0	0	0	0	0	0	0	0	0	0	0	0	0	0	0	0	0	0	0	0	0	0	0	0	0	0	0	0	0	0	0	0	0	0	0	0	0	0	0	0
Bangladesh	0	0	0	0	0	0	0	0	0	0	0	0	0	0	0	0	0	0	0	0	0	0	0	0	0	0	0	0	0	0	0	0	0	0	0	0	0	0	0	0	0
Barbados	0	0	0	0	0	0	0	0	0	0	0	0	0	0	0	0	0	0	0	0	0	0	0	0	0	0	0	0	0	0	0	0	0	0	0	0	0	0	0	0	0
Belarus	0	0	0	0	0	0	0	0	0	0	0	0	0	0	0	0	0	0	0	0	0	0	0	0	0	0	0	0	0	0	0	0	0	0	0	0	0	0	0	0	0
Belgium	0	0	0	0	0	0	0	0	0	0	0	0	0	0	0	0	0	0	0	0	0	0	0	0	0	0	0	0	0	0	0	0	0	0	0	0	0	0	0	0	0
Belize	0	0	0	0	0	0	0	0	0	0	0	0	0	0	0	0	0	0	0	0	0	0	0	0	0	0	0	0	0	0	0	0	0	0	0	0	0	0	0	0	0
Benin	39771.7	41440.9	43314.9	45322.1	47371.3	49401.9	50949.5	52487.7	54073.4	55787.2	57686.9	59851.2	62231.9	64786.6	67459.3	70208	72736.4	75368.9	78096.2	80914.6	83824.7	86559.3	89392.4	92326.1	95365.2	98514.1	101603	104816	108148	111595	115149	118594	122168	125853	129629	133480	137190	140999	144898	148881	152942
Bhutan	0	0	0	0	0	0	0	0	0	0	0	0	0	0	0	0	0	0	0	0	0	0	0	0	0	0	0	0	0	0	0	0	0	0	0	0	0	0	0	0	0
Bolivia	0	0	0	0	0	0	0	0	0	0	0	0	0	0	0	0	0	0	0	0	0	0	0	0	0	0	0	0	0	0	0	0	0	0	0	0	0	0	0	0	0
Bosnia and Herzegovina	0	0	0	0	0	0	0	0	0	0	0	0	0	0	0	0	0	0	0	0	0	0	0	0	0	0	0	0	0	0	0	0	0	0	0	0	0	0	0	0	0
Botswana	0	0	0	0	0	0	0	0	0	0	0	0	0	0	0	0	0	0	0	0	0	0	0	0	0	0	0	0	0	0	0	0	0	0	0	0	0	0	0	0	0
Brazil	0	0	0	0	0	0	0	0	0	0	0	0	0	0	0	0	0	0	0	0	0	0	0	0	0	0	0	0	0	0	0	0	0	0	0	0	0	0	0	0	0
Brunei	0	0	0	0	0	0	0	0	0	0	0	0	0	0	0	0	0	0	0	0	0	0	0	0	0	0	0	0	0	0	0	0	0	0	0	0	0	0	0	0	0
Bulgaria	0	0	0	0	0	0	0	0	0	0	0	0	0	0	0	0	0	0	0	0	0	0	0	0	0	0	0	0	0	0	0	0	0	0	0	0	0	0	0	0	0
Burkina Faso	39531.6	40554	41681.6	42914.7	44252	45690.5	47028	48490.6	50066.2	51739	53501.9	55163.9	56948.7	58849.6	60863.4	62989.8	65025.9	67203.7	69518.2	71967.8	74553	77039.8	79698.1	82517.1	85484.8	88595.5	91639.2	94843.1	98201.1	101710	105363	108905	112619	116487	120488	124608	128593	132727	136996	141391	145905
Burundi	22850.3	23107	23374.2	23660.7	23973.8	24326.2	24663.7	25030.4	25467.3	26023.5	26729.5	27885.6	29207	30657.7	32181.7	33733.4	35250.2	36790.3	38339.3	39886.2	41420.6	42628.3	43866.7	45126.8	46406	47715.1	48970.1	50287.8	51679.5	53165.6	54759.4	56344.2	58054.7	59892.7	61854.1	63934.3	66023.7	68235.5	70563.6	72995.8	75518.7
Cambodia	0	0	0	0	0	0	0	0	0	0	0	0	0	0	0	0	0	0	0	0	0	0	0	0	0	0	0	0	0	0	0	0	0	0	0	0	0	0	0	0	0
Cameroon	158872	163284	167980	172966	178273	183918	189284	195034	201151	207591	214320	220702	227384	234381	241720	249411	256692	264462	272642	281136	289897	298343	307153	316332	325918	335926	345690	355929	366624	377747	389275	400539	412277	424450	437012	449925	462568	475618	489046	502822	516918
Canada	0	0	0	0	0	0	0	0	0	0	0	0	0	0	0	0	0	0	0	0	0	0	0	0	0	0	0	0	0	0	0	0	0	0	0	0	0	0	0	0	0
Cape Verde	0	0	0	0	0	0	0	0	0	0	0	0	0	0	0	0	0	0	0	0	0	0	0	0	0	0	0	0	0	0	0	0	0	0	0	0	0	0	0	0	0
Central African Republic	52167.9	53262	54547.1	55981.2	57503.9	59072.2	60425.3	61808.1	63224.9	64692.2	66215.8	67341.8	68565.8	69884.6	71292.8	72802.4	74392.8	76140.1	78032.2	80056.2	82196.4	84302.5	86500.7	88793.7	91194.8	93703.5	95966	98397.1	100948	103552	106183	108680	111229	113839	116548	119369	122066	124890	127823	130833	133901
Chad	30613.8	31433.3	32315	33265.3	34294.2	35407.9	36442.7	37587.5	38846.3	40223.8	41720.8	43201.2	44831.8	46574.6	48389.7	50257.3	51957	53710.7	55540.6	57474.9	59531.9	61507.8	63629.4	65883.2	68251.6	70725.7	73111.5	75635.4	78301.2	81116.6	84084.1	87000	90103.3	93374.1	96789.6	100336	103814	107446	111227	115154	119222
Chile	0	0	0	0	0	0	0	0	0	0	0	0	0	0	0	0	0	0	0	0	0	0	0	0	0	0	0	0	0	0	0	0	0	0	0	0	0	0	0	0	0
China	0	0	0	0	0	0	0	0	0	0	0	0	0	0	0	0	0	0	0	0	0	0	0	0	0	0	0	0	0	0	0	0	0	0	0	0	0	0	0	0	0
Colombia	0	0	0	0	0	0	0	0	0	0	0	0	0	0	0	0	0	0	0	0	0	0	0	0	0	0	0	0	0	0	0	0	0	0	0	0	0	0	0	0	0
Comoros	0	0	0	0	0	0	0	0	0	0	0	0	0	0	0	0	0	0	0	0	0	0	0	0	0	0	0	0	0	0	0	0	0	0	0	0	0	0	0	0	0
Congo	6505.43	6699.92	6905.08	7121.52	7349.23	7587.86	7828.42	8080.24	8339.57	8602.29	8865.57	9082.39	9303.6	9534.06	9780.02	10046.4	10348.4	10674.1	11016.7	11368.3	11722.9	12019.8	12320.2	12627	12945	13278.7	13604.1	13953.2	14325.3	14718.2	15131.1	15577.4	16040.5	16522.8	17027.5	17553.9	18068.9	18608	19165.8	19734.1	20308.4
Costa Rica	0	0	0	0	0	0	0	0	0	0	0	0	0	0	0	0	0	0	0	0	0	0	0	0	0	0	0	0	0	0	0	0	0	0	0	0	0	0	0	0	0
Côte d’Ivoire	106041	109766	113734	117895	122164	126464	130118	133772	137353	140784	144010	145860	147531	149129	150782	152606	154687	156989	159573	162469	165666	169324	173244	177411	181817	186426	190407	194812	199490	204227	208938	213669	218307	223007	228020	233454	238807	244593	250743	257103	263580
Croatia	0	0	0	0	0	0	0	0	0	0	0	0	0	0	0	0	0	0	0	0	0	0	0	0	0	0	0	0	0	0	0	0	0	0	0	0	0	0	0	0	0
Cuba	0	0	0	0	0	0	0	0	0	0	0	0	0	0	0	0	0	0	0	0	0	0	0	0	0	0	0	0	0	0	0	0	0	0	0	0	0	0	0	0	0
Cyprus	0	0	0	0	0	0	0	0	0	0	0	0	0	0	0	0	0	0	0	0	0	0	0	0	0	0	0	0	0	0	0	0	0	0	0	0	0	0	0	0	0
Czech Republic	0	0	0	0	0	0	0	0	0	0	0	0	0	0	0	0	0	0	0	0	0	0	0	0	0	0	0	0	0	0	0	0	0	0	0	0	0	0	0	0	0
Democratic Republic of the Congo	612292	633559	657199	681854	706122	729315	745797	761363	777253	794821	814920	835399	858999	885201	913499	943517	970986	1.00098e+06	1.03315e+06	1.06707e+06	1.10248e+06	1.13518e+06	1.1699e+06	1.20657e+06	1.24523e+06	1.28589e+06	1.32399e+06	1.36454e+06	1.40733e+06	1.45216e+06	1.49887e+06	1.54249e+06	1.58867e+06	1.63714e+06	1.6876e+06	1.73989e+06	1.7891e+06	1.8407e+06	1.8945e+06	1.95037e+06	2.00818e+06
Denmark	0	0	0	0	0	0	0	0	0	0	0	0	0	0	0	0	0	0	0	0	0	0	0	0	0	0	0	0	0	0	0	0	0	0	0	0	0	0	0	0	0
Djibouti	0	0	0	0	0	0	0	0	0	0	0	0	0	0	0	0	0	0	0	0	0	0	0	0	0	0	0	0	0	0	0	0	0	0	0	0	0	0	0	0	0
Dominican Republic	0	0	0	0	0	0	0	0	0	0	0	0	0	0	0	0	0	0	0	0	0	0	0	0	0	0	0	0	0	0	0	0	0	0	0	0	0	0	0	0	0
Ecuador	0	0	0	0	0	0	0	0	0	0	0	0	0	0	0	0	0	0	0	0	0	0	0	0	0	0	0	0	0	0	0	0	0	0	0	0	0	0	0	0	0
Egypt	0	0	0	0	0	0	0	0	0	0	0	0	0	0	0	0	0	0	0	0	0	0	0	0	0	0	0	0	0	0	0	0	0	0	0	0	0	0	0	0	0
El Salvador	0	0	0	0	0	0	0	0	0	0	0	0	0	0	0	0	0	0	0	0	0	0	0	0	0	0	0	0	0	0	0	0	0	0	0	0	0	0	0	0	0
Equatorial Guinea	3275.88	3339.18	3412.18	3493.19	3580.96	3675.57	3776.01	3884.15	4003.57	4138.75	4291.25	4442.82	4614.09	4800.65	4995.72	5194.53	5371.07	5551.63	5736.69	5929.18	6130.18	6313.43	6509.54	6713.53	6919.15	7123.31	7311.26	7500.2	7691.05	7886.23	8086.7	8272.83	8467.15	8668.69	8876.06	9088.38	9291.39	9502.34	9721.11	9948.01	10183
Eritrea	0	0	0	0	0	0	0	0	0	0	0	0	0	0	0	0	0	0	0	0	0	0	0	0	0	0	0	0	0	0	0	0	0	0	0	0	0	0	0	0	0
Estonia	0	0	0	0	0	0	0	0	0	0	0	0	0	0	0	0	0	0	0	0	0	0	0	0	0	0	0	0	0	0	0	0	0	0	0	0	0	0	0	0	0
Ethiopia	67463.5	69578.1	71878.9	74325.7	76859.6	79435.7	81823.4	84233.1	86698.2	89294.9	92078.8	94677.3	97554.7	100646	103875	107222	110628	114206	118007	122077	126421	131046	135898	140968	146238	151683	157062	162643	168379	174209	180103	185891	191765	197715	203747	209861	215934	222082	228300	234584	240922
Federated States of Micronesia	0	0	0	0	0	0	0	0	0	0	0	0	0	0	0	0	0	0	0	0	0	0	0	0	0	0	0	0	0	0	0	0	0	0	0	0	0	0	0	0	0
Fiji	0	0	0	0	0	0	0	0	0	0	0	0	0	0	0	0	0	0	0	0	0	0	0	0	0	0	0	0	0	0	0	0	0	0	0	0	0	0	0	0	0
Finland	0	0	0	0	0	0	0	0	0	0	0	0	0	0	0	0	0	0	0	0	0	0	0	0	0	0	0	0	0	0	0	0	0	0	0	0	0	0	0	0	0
France	0	0	0	0	0	0	0	0	0	0	0	0	0	0	0	0	0	0	0	0	0	0	0	0	0	0	0	0	0	0	0	0	0	0	0	0	0	0	0	0	0
Gabon	0	0	0	0	0	0	0	0	0	0	0	0	0	0	0	0	0	0	0	0	0	0	0	0	0	0	0	0	0	0	0	0	0	0	0	0	0	0	0	0	0
Georgia	0	0	0	0	0	0	0	0	0	0	0	0	0	0	0	0	0	0	0	0	0	0	0	0	0	0	0	0	0	0	0	0	0	0	0	0	0	0	0	0	0
Germany	0	0	0	0	0	0	0	0	0	0	0	0	0	0	0	0	0	0	0	0	0	0	0	0	0	0	0	0	0	0	0	0	0	0	0	0	0	0	0	0	0
Ghana	75227.3	77350.8	79574.1	81880.1	84255.9	86699.4	89045.4	91497.7	94057.4	96712.4	99453.9	102028	104639	107322	110130	113092	115949	119035	122308	125686	129122	132574	136105	139721	143456	147333	151163	155128	159221	163431	167745	171957	176271	180686	185194	189781	194178	198668	203225	207815	212415
Greece	0	0	0	0	0	0	0	0	0	0	0	0	0	0	0	0	0	0	0	0	0	0	0	0	0	0	0	0	0	0	0	0	0	0	0	0	0	0	0	0	0
Grenada	0	0	0	0	0	0	0	0	0	0	0	0	0	0	0	0	0	0	0	0	0	0	0	0	0	0	0	0	0	0	0	0	0	0	0	0	0	0	0	0	0
Guatemala	0	0	0	0	0	0	0	0	0	0	0	0	0	0	0	0	0	0	0	0	0	0	0	0	0	0	0	0	0	0	0	0	0	0	0	0	0	0	0	0	0
Guinea	35695.3	37513.2	39670.2	41974.7	44206.1	46238.4	47674.9	48858.6	49892.6	50907.5	51993.4	52935.9	53958.7	55090.1	56358.5	57778.5	59247.2	60928.1	62778.4	64746.8	66797.7	68759.4	70832.5	72998.4	75238	77541.1	79736.5	82011.8	84372.1	86827.9	89383.3	91848.1	94427.6	97112.4	99890	102751	105507	108362	111309	114343	117459
Guinea-Bissau	3713.23	3814.72	3906.92	3994.45	4089.27	4196.97	4288.63	4394.94	4513.4	4638.86	4769.01	4893.79	5025.35	5162.04	5302.91	5447.1	5571.3	5700.66	5838.23	5988.23	6153.05	6315.51	6497.04	6690.14	6884.9	7075.9	7244	7412.18	7585.96	7773.56	7979.32	8181.06	8401.49	8635.69	8877.12	9122.25	9350.5	9584.51	9827.87	10086.3	10362
Guyana	0	0	0	0	0	0	0	0	0	0	0	0	0	0	0	0	0	0	0	0	0	0	0	0	0	0	0	0	0	0	0	0	0	0	0	0	0	0	0	0	0
Haiti	0	0	0	0	0	0	0	0	0	0	0	0	0	0	0	0	0	0	0	0	0	0	0	0	0	0	0	0	0	0	0	0	0	0	0	0	0	0	0	0	0
Honduras	0	0	0	0	0	0	0	0	0	0	0	0	0	0	0	0	0	0	0	0	0	0	0	0	0	0	0	0	0	0	0	0	0	0	0	0	0	0	0	0	0
Hungary	0	0	0	0	0	0	0	0	0	0	0	0	0	0	0	0	0	0	0	0	0	0	0	0	0	0	0	0	0	0	0	0	0	0	0	0	0	0	0	0	0
Iceland	0	0	0	0	0	0	0	0	0	0	0	0	0	0	0	0	0	0	0	0	0	0	0	0	0	0	0	0	0	0	0	0	0	0	0	0	0	0	0	0	0
India	0	0	0	0	0	0	0	0	0	0	0	0	0	0	0	0	0	0	0	0	0	0	0	0	0	0	0	0	0	0	0	0	0	0	0	0	0	0	0	0	0
Indonesia	0	0	0	0	0	0	0	0	0	0	0	0	0	0	0	0	0	0	0	0	0	0	0	0	0	0	0	0	0	0	0	0	0	0	0	0	0	0	0	0	0
Iran	0	0	0	0	0	0	0	0	0	0	0	0	0	0	0	0	0	0	0	0	0	0	0	0	0	0	0	0	0	0	0	0	0	0	0	0	0	0	0	0	0
Iraq	0	0	0	0	0	0	0	0	0	0	0	0	0	0	0	0	0	0	0	0	0	0	0	0	0	0	0	0	0	0	0	0	0	0	0	0	0	0	0	0	0
Ireland	0	0	0	0	0	0	0	0	0	0	0	0	0	0	0	0	0	0	0	0	0	0	0	0	0	0	0	0	0	0	0	0	0	0	0	0	0	0	0	0	0
Israel	0	0	0	0	0	0	0	0	0	0	0	0	0	0	0	0	0	0	0	0	0	0	0	0	0	0	0	0	0	0	0	0	0	0	0	0	0	0	0	0	0
Italy	0	0	0	0	0	0	0	0	0	0	0	0	0	0	0	0	0	0	0	0	0	0	0	0	0	0	0	0	0	0	0	0	0	0	0	0	0	0	0	0	0
Jamaica	0	0	0	0	0	0	0	0	0	0	0	0	0	0	0	0	0	0	0	0	0	0	0	0	0	0	0	0	0	0	0	0	0	0	0	0	0	0	0	0	0
Japan	0	0	0	0	0	0	0	0	0	0	0	0	0	0	0	0	0	0	0	0	0	0	0	0	0	0	0	0	0	0	0	0	0	0	0	0	0	0	0	0	0
Jordan	0	0	0	0	0	0	0	0	0	0	0	0	0	0	0	0	0	0	0	0	0	0	0	0	0	0	0	0	0	0	0	0	0	0	0	0	0	0	0	0	0
Kazakhstan	0	0	0	0	0	0	0	0	0	0	0	0	0	0	0	0	0	0	0	0	0	0	0	0	0	0	0	0	0	0	0	0	0	0	0	0	0	0	0	0	0
Kenya	0	0	0	0	0	0	0	0	0	0	0	0	0	0	0	0	0	0	0	0	0	0	0	0	0	0	0	0	0	0	0	0	0	0	0	0	0	0	0	0	0
Kiribati	0	0	0	0	0	0	0	0	0	0	0	0	0	0	0	0	0	0	0	0	0	0	0	0	0	0	0	0	0	0	0	0	0	0	0	0	0	0	0	0	0
Kuwait	0	0	0	0	0	0	0	0	0	0	0	0	0	0	0	0	0	0	0	0	0	0	0	0	0	0	0	0	0	0	0	0	0	0	0	0	0	0	0	0	0
Kyrgyzstan	0	0	0	0	0	0	0	0	0	0	0	0	0	0	0	0	0	0	0	0	0	0	0	0	0	0	0	0	0	0	0	0	0	0	0	0	0	0	0	0	0
Laos	0	0	0	0	0	0	0	0	0	0	0	0	0	0	0	0	0	0	0	0	0	0	0	0	0	0	0	0	0	0	0	0	0	0	0	0	0	0	0	0	0
Latvia	0	0	0	0	0	0	0	0	0	0	0	0	0	0	0	0	0	0	0	0	0	0	0	0	0	0	0	0	0	0	0	0	0	0	0	0	0	0	0	0	0
Lebanon	0	0	0	0	0	0	0	0	0	0	0	0	0	0	0	0	0	0	0	0	0	0	0	0	0	0	0	0	0	0	0	0	0	0	0	0	0	0	0	0	0
Lesotho	0	0	0	0	0	0	0	0	0	0	0	0	0	0	0	0	0	0	0	0	0	0	0	0	0	0	0	0	0	0	0	0	0	0	0	0	0	0	0	0	0
Liberia	41597.9	40928.1	40359.2	40151.6	40614.7	41889.4	44441.2	48005.8	52059.8	55971	59353.7	61484.9	62985.5	64203	65582	67402.6	69737.4	72558.2	75665.4	78819.8	81879.6	84617.6	87235.8	89831.2	92524	95388.5	98309.4	101390	104616	107959	111394	114766	118256	121848	125523	129266	132933	136682	140506	144401	148363
Libya	0	0	0	0	0	0	0	0	0	0	0	0	0	0	0	0	0	0	0	0	0	0	0	0	0	0	0	0	0	0	0	0	0	0	0	0	0	0	0	0	0
Lithuania	0	0	0	0	0	0	0	0	0	0	0	0	0	0	0	0	0	0	0	0	0	0	0	0	0	0	0	0	0	0	0	0	0	0	0	0	0	0	0	0	0
Luxembourg	0	0	0	0	0	0	0	0	0	0	0	0	0	0	0	0	0	0	0	0	0	0	0	0	0	0	0	0	0	0	0	0	0	0	0	0	0	0	0	0	0
Macedonia	0	0	0	0	0	0	0	0	0	0	0	0	0	0	0	0	0	0	0	0	0	0	0	0	0	0	0	0	0	0	0	0	0	0	0	0	0	0	0	0	0
Madagascar	0	0	0	0	0	0	0	0	0	0	0	0	0	0	0	0	0	0	0	0	0	0	0	0	0	0	0	0	0	0	0	0	0	0	0	0	0	0	0	0	0
Malawi	17977.3	18442.1	18731.8	18929.7	19141.9	19435.7	19707	20119.1	20627	21176.2	21735.6	22266.6	22820.4	23412.2	24059.3	24768.4	25531.6	26339.4	27192	28094.7	29049.9	29948.1	30953.6	32036.2	33151.7	34281.1	35477.2	36651.9	37844.8	39120.5	40507.4	41860.3	43341.1	44915.9	46525.7	48140.9	49727.9	51331.1	52960	54641	56388
Malaysia	0	0	0	0	0	0	0	0	0	0	0	0	0	0	0	0	0	0	0	0	0	0	0	0	0	0	0	0	0	0	0	0	0	0	0	0	0	0	0	0	0
Maldives	0	0	0	0	0	0	0	0	0	0	0	0	0	0	0	0	0	0	0	0	0	0	0	0	0	0	0	0	0	0	0	0	0	0	0	0	0	0	0	0	0
Mali	9891.08	10078.8	10323	10611.7	10929.7	11266.2	11572.6	11903.8	12260.2	12644.8	13060.4	13464.9	13909.7	14387.9	14892.1	15418.5	15901.7	16417.1	16960	17526.5	18114.6	18607	19125.3	19676.4	20270.4	20915.5	21572.3	22296	23078.5	23909.4	24782.9	25637.7	26542	27496.7	28505.4	29570.1	30610.8	31717.3	32882.5	34097.4	35356.9
Malta	0	0	0	0	0	0	0	0	0	0	0	0	0	0	0	0	0	0	0	0	0	0	0	0	0	0	0	0	0	0	0	0	0	0	0	0	0	0	0	0	0
Mauritania	0	0	0	0	0	0	0	0	0	0	0	0	0	0	0	0	0	0	0	0	0	0	0	0	0	0	0	0	0	0	0	0	0	0	0	0	0	0	0	0	0
Mauritius	0	0	0	0	0	0	0	0	0	0	0	0	0	0	0	0	0	0	0	0	0	0	0	0	0	0	0	0	0	0	0	0	0	0	0	0	0	0	0	0	0
Mexico	0	0	0	0	0	0	0	0	0	0	0	0	0	0	0	0	0	0	0	0	0	0	0	0	0	0	0	0	0	0	0	0	0	0	0	0	0	0	0	0	0
Moldova	0	0	0	0	0	0	0	0	0	0	0	0	0	0	0	0	0	0	0	0	0	0	0	0	0	0	0	0	0	0	0	0	0	0	0	0	0	0	0	0	0
Mongolia	0	0	0	0	0	0	0	0	0	0	0	0	0	0	0	0	0	0	0	0	0	0	0	0	0	0	0	0	0	0	0	0	0	0	0	0	0	0	0	0	0
Montenegro	0	0	0	0	0	0	0	0	0	0	0	0	0	0	0	0	0	0	0	0	0	0	0	0	0	0	0	0	0	0	0	0	0	0	0	0	0	0	0	0	0
Morocco	0	0	0	0	0	0	0	0	0	0	0	0	0	0	0	0	0	0	0	0	0	0	0	0	0	0	0	0	0	0	0	0	0	0	0	0	0	0	0	0	0
Mozambique	0	0	0	0	0	0	0	0	0	0	0	0	0	0	0	0	0	0	0	0	0	0	0	0	0	0	0	0	0	0	0	0	0	0	0	0	0	0	0	0	0
Myanmar	0	0	0	0	0	0	0	0	0	0	0	0	0	0	0	0	0	0	0	0	0	0	0	0	0	0	0	0	0	0	0	0	0	0	0	0	0	0	0	0	0
Namibia	0	0	0	0	0	0	0	0	0	0	0	0	0	0	0	0	0	0	0	0	0	0	0	0	0	0	0	0	0	0	0	0	0	0	0	0	0	0	0	0	0
Nepal	0	0	0	0	0	0	0	0	0	0	0	0	0	0	0	0	0	0	0	0	0	0	0	0	0	0	0	0	0	0	0	0	0	0	0	0	0	0	0	0	0
Netherlands	0	0	0	0	0	0	0	0	0	0	0	0	0	0	0	0	0	0	0	0	0	0	0	0	0	0	0	0	0	0	0	0	0	0	0	0	0	0	0	0	0
New Zealand	0	0	0	0	0	0	0	0	0	0	0	0	0	0	0	0	0	0	0	0	0	0	0	0	0	0	0	0	0	0	0	0	0	0	0	0	0	0	0	0	0
Nicaragua	0	0	0	0	0	0	0	0	0	0	0	0	0	0	0	0	0	0	0	0	0	0	0	0	0	0	0	0	0	0	0	0	0	0	0	0	0	0	0	0	0
Niger	1536.09	1583.19	1639.6	1703.55	1773	1846.96	1923.73	2003.12	2084.37	2167.54	2253.52	2327.52	2407.98	2493.13	2581.3	2672.52	2762.47	2857.18	2956.68	3061.76	3173.51	3287.34	3408.76	3537.45	3673.22	3816.43	3959.98	4113.33	4274.99	4443.42	4618.46	4794.89	4980.49	5174.78	5377.66	5589.94	5804.76	6031.42	6271.28	6526.61	6799.36
Nigeria	498852	511829	525756	540637	556472	573228	588457	604798	622111	640203	658934	675488	693021	711451	730725	750821	769290	788971	809782	831636	854490	876457	899572	923948	949805	977247	1.00359e+06	1.03206e+06	1.06237e+06	1.09411e+06	1.12708e+06	1.16002e+06	1.19426e+06	1.23005e+06	1.26773e+06	1.30741e+06	1.34664e+06	1.38801e+06	1.43135e+06	1.47636e+06	1.52284e+06
North Korea	0	0	0	0	0	0	0	0	0	0	0	0	0	0	0	0	0	0	0	0	0	0	0	0	0	0	0	0	0	0	0	0	0	0	0	0	0	0	0	0	0
Norway	0	0	0	0	0	0	0	0	0	0	0	0	0	0	0	0	0	0	0	0	0	0	0	0	0	0	0	0	0	0	0	0	0	0	0	0	0	0	0	0	0
Oman	0	0	0	0	0	0	0	0	0	0	0	0	0	0	0	0	0	0	0	0	0	0	0	0	0	0	0	0	0	0	0	0	0	0	0	0	0	0	0	0	0
Pakistan	0	0	0	0	0	0	0	0	0	0	0	0	0	0	0	0	0	0	0	0	0	0	0	0	0	0	0	0	0	0	0	0	0	0	0	0	0	0	0	0	0
Palestine	0	0	0	0	0	0	0	0	0	0	0	0	0	0	0	0	0	0	0	0	0	0	0	0	0	0	0	0	0	0	0	0	0	0	0	0	0	0	0	0	0
Panama	0	0	0	0	0	0	0	0	0	0	0	0	0	0	0	0	0	0	0	0	0	0	0	0	0	0	0	0	0	0	0	0	0	0	0	0	0	0	0	0	0
Papua New Guinea	0	0	0	0	0	0	0	0	0	0	0	0	0	0	0	0	0	0	0	0	0	0	0	0	0	0	0	0	0	0	0	0	0	0	0	0	0	0	0	0	0
Paraguay	0	0	0	0	0	0	0	0	0	0	0	0	0	0	0	0	0	0	0	0	0	0	0	0	0	0	0	0	0	0	0	0	0	0	0	0	0	0	0	0	0
Peru	0	0	0	0	0	0	0	0	0	0	0	0	0	0	0	0	0	0	0	0	0	0	0	0	0	0	0	0	0	0	0	0	0	0	0	0	0	0	0	0	0
Philippines	0	0	0	0	0	0	0	0	0	0	0	0	0	0	0	0	0	0	0	0	0	0	0	0	0	0	0	0	0	0	0	0	0	0	0	0	0	0	0	0	0
Poland	0	0	0	0	0	0	0	0	0	0	0	0	0	0	0	0	0	0	0	0	0	0	0	0	0	0	0	0	0	0	0	0	0	0	0	0	0	0	0	0	0
Portugal	0	0	0	0	0	0	0	0	0	0	0	0	0	0	0	0	0	0	0	0	0	0	0	0	0	0	0	0	0	0	0	0	0	0	0	0	0	0	0	0	0
Qatar	0	0	0	0	0	0	0	0	0	0	0	0	0	0	0	0	0	0	0	0	0	0	0	0	0	0	0	0	0	0	0	0	0	0	0	0	0	0	0	0	0
Romania	0	0	0	0	0	0	0	0	0	0	0	0	0	0	0	0	0	0	0	0	0	0	0	0	0	0	0	0	0	0	0	0	0	0	0	0	0	0	0	0	0
Russia	0	0	0	0	0	0	0	0	0	0	0	0	0	0	0	0	0	0	0	0	0	0	0	0	0	0	0	0	0	0	0	0	0	0	0	0	0	0	0	0	0
Rwanda	0	0	0	0	0	0	0	0	0	0	0	0	0	0	0	0	0	0	0	0	0	0	0	0	0	0	0	0	0	0	0	0	0	0	0	0	0	0	0	0	0
Saint Lucia	0	0	0	0	0	0	0	0	0	0	0	0	0	0	0	0	0	0	0	0	0	0	0	0	0	0	0	0	0	0	0	0	0	0	0	0	0	0	0	0	0
Saint Vincent and the Grenadines	0	0	0	0	0	0	0	0	0	0	0	0	0	0	0	0	0	0	0	0	0	0	0	0	0	0	0	0	0	0	0	0	0	0	0	0	0	0	0	0	0
Samoa	0	0	0	0	0	0	0	0	0	0	0	0	0	0	0	0	0	0	0	0	0	0	0	0	0	0	0	0	0	0	0	0	0	0	0	0	0	0	0	0	0
São Tomé and Príncipe	0	0	0	0	0	0	0	0	0	0	0	0	0	0	0	0	0	0	0	0	0	0	0	0	0	0	0	0	0	0	0	0	0	0	0	0	0	0	0	0	0
Saudi Arabia	0	0	0	0	0	0	0	0	0	0	0	0	0	0	0	0	0	0	0	0	0	0	0	0	0	0	0	0	0	0	0	0	0	0	0	0	0	0	0	0	0
Senegal	461.274	475.434	490.879	507.166	523.729	540.273	553.337	566.417	579.956	594.5	610.394	627.165	645.393	664.91	685.448	706.784	726.833	748.044	770.372	793.801	818.397	844.827	872.457	901.277	931.416	962.913	993.689	1026.38	1060.74	1096.32	1132.95	1170.42	1208.62	1247.95	1289.02	1332.04	1374.77	1419.46	1465.78	1513.11	1561.09
Serbia	0	0	0	0	0	0	0	0	0	0	0	0	0	0	0	0	0	0	0	0	0	0	0	0	0	0	0	0	0	0	0	0	0	0	0	0	0	0	0	0	0
Seychelles	0	0	0	0	0	0	0	0	0	0	0	0	0	0	0	0	0	0	0	0	0	0	0	0	0	0	0	0	0	0	0	0	0	0	0	0	0	0	0	0	0
Sierra Leone	38553.5	38630	38490	38263.3	38101.1	38101.7	38098.2	38301.4	38773.2	39584.4	40754.3	42278.1	44281.6	46546.9	48814.8	50928.9	52550.7	53985.6	55315.6	56655.2	58081.2	59412.9	60798.2	62259.2	63818.6	65482.6	67017.6	68684.5	70453.7	72280.9	74138.6	75818.5	77549.6	79329.3	81160.3	83040.1	84746.8	86514.3	88333.2	90192.2	92081.8
Singapore	0	0	0	0	0	0	0	0	0	0	0	0	0	0	0	0	0	0	0	0	0	0	0	0	0	0	0	0	0	0	0	0	0	0	0	0	0	0	0	0	0
Slovakia	0	0	0	0	0	0	0	0	0	0	0	0	0	0	0	0	0	0	0	0	0	0	0	0	0	0	0	0	0	0	0	0	0	0	0	0	0	0	0	0	0
Slovenia	0	0	0	0	0	0	0	0	0	0	0	0	0	0	0	0	0	0	0	0	0	0	0	0	0	0	0	0	0	0	0	0	0	0	0	0	0	0	0	0	0
Solomon Islands	0	0	0	0	0	0	0	0	0	0	0	0	0	0	0	0	0	0	0	0	0	0	0	0	0	0	0	0	0	0	0	0	0	0	0	0	0	0	0	0	0
Somalia	0	0	0	0	0	0	0	0	0	0	0	0	0	0	0	0	0	0	0	0	0	0	0	0	0	0	0	0	0	0	0	0	0	0	0	0	0	0	0	0	0
South Africa	0	0	0	0	0	0	0	0	0	0	0	0	0	0	0	0	0	0	0	0	0	0	0	0	0	0	0	0	0	0	0	0	0	0	0	0	0	0	0	0	0
South Korea	0	0	0	0	0	0	0	0	0	0	0	0	0	0	0	0	0	0	0	0	0	0	0	0	0	0	0	0	0	0	0	0	0	0	0	0	0	0	0	0	0
Spain	0	0	0	0	0	0	0	0	0	0	0	0	0	0	0	0	0	0	0	0	0	0	0	0	0	0	0	0	0	0	0	0	0	0	0	0	0	0	0	0	0
Sri Lanka	0	0	0	0	0	0	0	0	0	0	0	0	0	0	0	0	0	0	0	0	0	0	0	0	0	0	0	0	0	0	0	0	0	0	0	0	0	0	0	0	0
Sudan	162950	167991	173525	179434	185571	191838	197462	203323	209425	215782	222424	228950	235819	243065	250761	258937	266997	275694	284891	294395	304101	313607	323298	333260	343628	354466	365170	376367	387980	399889	412017	423778	435827	448134	460683	473460	485858	498534	511467	524639	538034
Suriname	0	0	0	0	0	0	0	0	0	0	0	0	0	0	0	0	0	0	0	0	0	0	0	0	0	0	0	0	0	0	0	0	0	0	0	0	0	0	0	0	0
Swaziland	0	0	0	0	0	0	0	0	0	0	0	0	0	0	0	0	0	0	0	0	0	0	0	0	0	0	0	0	0	0	0	0	0	0	0	0	0	0	0	0	0
Sweden	0	0	0	0	0	0	0	0	0	0	0	0	0	0	0	0	0	0	0	0	0	0	0	0	0	0	0	0	0	0	0	0	0	0	0	0	0	0	0	0	0
Switzerland	0	0	0	0	0	0	0	0	0	0	0	0	0	0	0	0	0	0	0	0	0	0	0	0	0	0	0	0	0	0	0	0	0	0	0	0	0	0	0	0	0
Syria	0	0	0	0	0	0	0	0	0	0	0	0	0	0	0	0	0	0	0	0	0	0	0	0	0	0	0	0	0	0	0	0	0	0	0	0	0	0	0	0	0
Tajikistan	0	0	0	0	0	0	0	0	0	0	0	0	0	0	0	0	0	0	0	0	0	0	0	0	0	0	0	0	0	0	0	0	0	0	0	0	0	0	0	0	0
Tanzania	51580.6	53319.9	55240.6	57281.1	59363.1	61442	63226.5	65003.7	66807.4	68680.7	70649.1	72528.4	74506.9	76588.2	78773.2	81059.6	83344.6	85766.6	88313	90978.2	93762.8	96566.8	99563.9	102726	106022	109443	112952	116575	120346	124310	128486	132711	137154	141801	146618	151581	156568	161719	167021	172467	178048
Thailand	0	0	0	0	0	0	0	0	0	0	0	0	0	0	0	0	0	0	0	0	0	0	0	0	0	0	0	0	0	0	0	0	0	0	0	0	0	0	0	0	0
The Bahamas	0	0	0	0	0	0	0	0	0	0	0	0	0	0	0	0	0	0	0	0	0	0	0	0	0	0	0	0	0	0	0	0	0	0	0	0	0	0	0	0	0
The Gambia	0	0	0	0	0	0	0	0	0	0	0	0	0	0	0	0	0	0	0	0	0	0	0	0	0	0	0	0	0	0	0	0	0	0	0	0	0	0	0	0	0
Timor-Leste	0	0	0	0	0	0	0	0	0	0	0	0	0	0	0	0	0	0	0	0	0	0	0	0	0	0	0	0	0	0	0	0	0	0	0	0	0	0	0	0	0
Togo	8889.21	9076.43	9267.03	9467.44	9685.58	9927.86	10215.5	10531.2	10873	11236.8	11618.5	11999.4	12400	12818.2	13251.3	13697.1	14116.9	14555	15009.4	15477.6	15958.3	16425.6	16907.1	17404.8	17923.2	18465.1	18987.8	19543.9	20128.4	20733.3	21354.5	21974.3	22607.6	23259.5	23937.8	24645	25333.6	26052.4	26796.1	27555.9	28325.7
Tonga	0	0	0	0	0	0	0	0	0	0	0	0	0	0	0	0	0	0	0	0	0	0	0	0	0	0	0	0	0	0	0	0	0	0	0	0	0	0	0	0	0
Trinidad and Tobago	0	0	0	0	0	0	0	0	0	0	0	0	0	0	0	0	0	0	0	0	0	0	0	0	0	0	0	0	0	0	0	0	0	0	0	0	0	0	0	0	0
Tunisia	0	0	0	0	0	0	0	0	0	0	0	0	0	0	0	0	0	0	0	0	0	0	0	0	0	0	0	0	0	0	0	0	0	0	0	0	0	0	0	0	0
Turkey	0	0	0	0	0	0	0	0	0	0	0	0	0	0	0	0	0	0	0	0	0	0	0	0	0	0	0	0	0	0	0	0	0	0	0	0	0	0	0	0	0
Turkmenistan	0	0	0	0	0	0	0	0	0	0	0	0	0	0	0	0	0	0	0	0	0	0	0	0	0	0	0	0	0	0	0	0	0	0	0	0	0	0	0	0	0
Uganda	38470.6	39614.8	40812.6	42063.7	43372.3	44744.6	45972.6	47292.1	48715.2	50253.2	51913.5	53632.2	55481	57450.7	59535.8	61732.2	63925	66257.8	68722.4	71308.2	74013.3	76764.4	79656.2	82689	85869	89199.2	92545.5	96057	99731.9	103567	107560	111580	115773	120135	124656	129330	134031	138898	143927	149109	154439
Ukraine	0	0	0	0	0	0	0	0	0	0	0	0	0	0	0	0	0	0	0	0	0	0	0	0	0	0	0	0	0	0	0	0	0	0	0	0	0	0	0	0	0
United Arab Emirates	0	0	0	0	0	0	0	0	0	0	0	0	0	0	0	0	0	0	0	0	0	0	0	0	0	0	0	0	0	0	0	0	0	0	0	0	0	0	0	0	0
United Kingdom	0	0	0	0	0	0	0	0	0	0	0	0	0	0	0	0	0	0	0	0	0	0	0	0	0	0	0	0	0	0	0	0	0	0	0	0	0	0	0	0	0
United States	0	0	0	0	0	0	0	0	0	0	0	0	0	0	0	0	0	0	0	0	0	0	0	0	0	0	0	0	0	0	0	0	0	0	0	0	0	0	0	0	0
Uruguay	0	0	0	0	0	0	0	0	0	0	0	0	0	0	0	0	0	0	0	0	0	0	0	0	0	0	0	0	0	0	0	0	0	0	0	0	0	0	0	0	0
Uzbekistan	0	0	0	0	0	0	0	0	0	0	0	0	0	0	0	0	0	0	0	0	0	0	0	0	0	0	0	0	0	0	0	0	0	0	0	0	0	0	0	0	0
Vanuatu	0	0	0	0	0	0	0	0	0	0	0	0	0	0	0	0	0	0	0	0	0	0	0	0	0	0	0	0	0	0	0	0	0	0	0	0	0	0	0	0	0
Venezuela	0	0	0	0	0	0	0	0	0	0	0	0	0	0	0	0	0	0	0	0	0	0	0	0	0	0	0	0	0	0	0	0	0	0	0	0	0	0	0	0	0
Vietnam	0	0	0	0	0	0	0	0	0	0	0	0	0	0	0	0	0	0	0	0	0	0	0	0	0	0	0	0	0	0	0	0	0	0	0	0	0	0	0	0	0
Yemen	0	0	0	0	0	0	0	0	0	0	0	0	0	0	0	0	0	0	0	0	0	0	0	0	0	0	0	0	0	0	0	0	0	0	0	0	0	0	0	0	0
Zambia	0	0	0	0	0	0	0	0	0	0	0	0	0	0	0	0	0	0	0	0	0	0	0	0	0	0	0	0	0	0	0	0	0	0	0	0	0	0	0	0	0
Zimbabwe	0	0	0	0	0	0	0	0	0	0	0	0	0	0	0	0	0	0	0	0	0	0	0	0	0	0	0	0	0	0	0	0	0	0	0	0	0	0	0	0	0
WOMEN
Afghanistan	0	0	0	0	0	0	0	0	0	0	0	0	0	0	0	0	0	0	0	0	0	0	0	0	0	0	0	0	0	0	0	0	0	0	0	0	0	0	0	0	0
Albania	0	0	0	0	0	0	0	0	0	0	0	0	0	0	0	0	0	0	0	0	0	0	0	0	0	0	0	0	0	0	0	0	0	0	0	0	0	0	0	0	0
Algeria	0	0	0	0	0	0	0	0	0	0	0	0	0	0	0	0	0	0	0	0	0	0	0	0	0	0	0	0	0	0	0	0	0	0	0	0	0	0	0	0	0
Angola	7851.77	8063.1	8313.58	8590.68	8878.78	9169.24	9406.23	9650.77	9912.5	10203	10528.1	10846.8	11207.8	11602.3	12019.8	12453.8	12853.9	13277.7	13724.8	14197.2	14696.7	15170.4	15684.1	16232.8	16809.1	17409.2	18008.1	18628.1	19274.9	19957.4	20678.2	21368.9	22105.7	22880.2	23679.8	24497.4	25290.9	26110.8	26956.7	27831.6	28736.9
Antigua and Barbuda	0	0	0	0	0	0	0	0	0	0	0	0	0	0	0	0	0	0	0	0	0	0	0	0	0	0	0	0	0	0	0	0	0	0	0	0	0	0	0	0	0
Argentina	0	0	0	0	0	0	0	0	0	0	0	0	0	0	0	0	0	0	0	0	0	0	0	0	0	0	0	0	0	0	0	0	0	0	0	0	0	0	0	0	0
Armenia	0	0	0	0	0	0	0	0	0	0	0	0	0	0	0	0	0	0	0	0	0	0	0	0	0	0	0	0	0	0	0	0	0	0	0	0	0	0	0	0	0
Australia	0	0	0	0	0	0	0	0	0	0	0	0	0	0	0	0	0	0	0	0	0	0	0	0	0	0	0	0	0	0	0	0	0	0	0	0	0	0	0	0	0
Austria	0	0	0	0	0	0	0	0	0	0	0	0	0	0	0	0	0	0	0	0	0	0	0	0	0	0	0	0	0	0	0	0	0	0	0	0	0	0	0	0	0
Azerbaijan	0	0	0	0	0	0	0	0	0	0	0	0	0	0	0	0	0	0	0	0	0	0	0	0	0	0	0	0	0	0	0	0	0	0	0	0	0	0	0	0	0
Bahrain	0	0	0	0	0	0	0	0	0	0	0	0	0	0	0	0	0	0	0	0	0	0	0	0	0	0	0	0	0	0	0	0	0	0	0	0	0	0	0	0	0
Bangladesh	0	0	0	0	0	0	0	0	0	0	0	0	0	0	0	0	0	0	0	0	0	0	0	0	0	0	0	0	0	0	0	0	0	0	0	0	0	0	0	0	0
Barbados	0	0	0	0	0	0	0	0	0	0	0	0	0	0	0	0	0	0	0	0	0	0	0	0	0	0	0	0	0	0	0	0	0	0	0	0	0	0	0	0	0
Belarus	0	0	0	0	0	0	0	0	0	0	0	0	0	0	0	0	0	0	0	0	0	0	0	0	0	0	0	0	0	0	0	0	0	0	0	0	0	0	0	0	0
Belgium	0	0	0	0	0	0	0	0	0	0	0	0	0	0	0	0	0	0	0	0	0	0	0	0	0	0	0	0	0	0	0	0	0	0	0	0	0	0	0	0	0
Belize	0	0	0	0	0	0	0	0	0	0	0	0	0	0	0	0	0	0	0	0	0	0	0	0	0	0	0	0	0	0	0	0	0	0	0	0	0	0	0	0	0
Benin	36193	37426.2	38779.5	40216.9	41696.5	43191.3	44466.6	45772.9	47131.2	48571.5	50116.2	51756.2	53518	55385.9	57341.4	59369.5	61292.1	63311.2	65417.8	67602.8	69862.3	72048	74315.9	76670.9	79123.2	81677.5	84208.3	86850.7	89593.9	92422.2	95323.6	98155.8	101079	104082	107156	110290	113337	116462	119657	122915	126232
Bhutan	0	0	0	0	0	0	0	0	0	0	0	0	0	0	0	0	0	0	0	0	0	0	0	0	0	0	0	0	0	0	0	0	0	0	0	0	0	0	0	0	0
Bolivia	0	0	0	0	0	0	0	0	0	0	0	0	0	0	0	0	0	0	0	0	0	0	0	0	0	0	0	0	0	0	0	0	0	0	0	0	0	0	0	0	0
Bosnia and Herzegovina	0	0	0	0	0	0	0	0	0	0	0	0	0	0	0	0	0	0	0	0	0	0	0	0	0	0	0	0	0	0	0	0	0	0	0	0	0	0	0	0	0
Botswana	0	0	0	0	0	0	0	0	0	0	0	0	0	0	0	0	0	0	0	0	0	0	0	0	0	0	0	0	0	0	0	0	0	0	0	0	0	0	0	0	0
Brazil	0	0	0	0	0	0	0	0	0	0	0	0	0	0	0	0	0	0	0	0	0	0	0	0	0	0	0	0	0	0	0	0	0	0	0	0	0	0	0	0	0
Brunei	0	0	0	0	0	0	0	0	0	0	0	0	0	0	0	0	0	0	0	0	0	0	0	0	0	0	0	0	0	0	0	0	0	0	0	0	0	0	0	0	0
Bulgaria	0	0	0	0	0	0	0	0	0	0	0	0	0	0	0	0	0	0	0	0	0	0	0	0	0	0	0	0	0	0	0	0	0	0	0	0	0	0	0	0	0
Burkina Faso	43101.1	44141.9	45278	46509.6	47837.4	49259.4	50570.2	52004.4	53544.8	55170.8	56871.7	58442.4	60123.8	61907.5	63789.1	65767.7	67630.4	69621.8	71738.3	73980.5	76349.3	78614.3	81044.7	83625	86337.7	89173.4	91931	94834.4	97879.3	101064	104385	107608	110994	114528	118190	121967	125637	129452	133399	137467	141647
Burundi	20071.3	20349.1	20664.9	21006.3	21352.3	21694.5	21846.3	21993.8	22183.9	22477.5	22915.2	23784.2	24812.6	25972.3	27215.5	28500.4	29780.3	31107.5	32459.6	33818.1	35170.1	36292	37422.9	38561.5	39713	40889.8	42035.6	43230.2	44482.5	45809.1	47220.9	48630.8	50142.2	51756.5	53470.4	55280.8	57119.2	59056.5	61085.8	63195.3	65372.8
Cambodia	0	0	0	0	0	0	0	0	0	0	0	0	0	0	0	0	0	0	0	0	0	0	0	0	0	0	0	0	0	0	0	0	0	0	0	0	0	0	0	0	0
Cameroon	139258	143043	147068	151330	155849	160636	165192	170052	175202	180610	186248	191568	197130	202942	209030	215400	221444	227891	234674	241716	248982	256048	263425	271109	279125	287488	295715	304327	313316	322671	332377	341902	351849	362173	372816	383743	394573	405725	417186	428950	441004
Canada	0	0	0	0	0	0	0	0	0	0	0	0	0	0	0	0	0	0	0	0	0	0	0	0	0	0	0	0	0	0	0	0	0	0	0	0	0	0	0	0	0
Cape Verde	0	0	0	0	0	0	0	0	0	0	0	0	0	0	0	0	0	0	0	0	0	0	0	0	0	0	0	0	0	0	0	0	0	0	0	0	0	0	0	0	0
Central African Republic	46318.6	47326.8	48486.8	49763.4	51105	52473.6	53657	54851.9	56063.6	57307.2	58588.1	59539.2	60561.6	61654.2	62814.5	64053.8	65388.7	66849.6	68426.5	70110	71887.9	73678.4	75543.1	77482.6	79505	81608.4	83541.2	85605.6	87761.2	89955.8	92166.7	94309.3	96489.9	98719.6	101030	103435	105797	108261	110816	113442	116127
Chad	25258.1	25902.2	26598.2	27349.3	28161.5	29038.4	29848.8	30745.8	31731.7	32810	33981.8	35142.3	36420.7	37786.6	39208.6	40671.2	42005.8	43381.8	44817.8	46337.7	47956.6	49514.7	51192.9	52973.7	54835.5	56767.8	58625.3	60582.3	62644.8	64824.1	67125.6	69396.2	71816.9	74371.1	77040.8	79815.3	82551.7	85413.9	88395	91491.5	94700.7
Chile	0	0	0	0	0	0	0	0	0	0	0	0	0	0	0	0	0	0	0	0	0	0	0	0	0	0	0	0	0	0	0	0	0	0	0	0	0	0	0	0	0
China	0	0	0	0	0	0	0	0	0	0	0	0	0	0	0	0	0	0	0	0	0	0	0	0	0	0	0	0	0	0	0	0	0	0	0	0	0	0	0	0	0
Colombia	0	0	0	0	0	0	0	0	0	0	0	0	0	0	0	0	0	0	0	0	0	0	0	0	0	0	0	0	0	0	0	0	0	0	0	0	0	0	0	0	0
Comoros	0	0	0	0	0	0	0	0	0	0	0	0	0	0	0	0	0	0	0	0	0	0	0	0	0	0	0	0	0	0	0	0	0	0	0	0	0	0	0	0	0
Congo	5057.87	5206.37	5362.81	5527.32	5699.67	5879.44	6060.39	6249.16	6442.9	6638.64	6834.38	6996.13	7160.57	7331.66	7514.39	7712.71	7940.21	8186.1	8444.94	8710.53	8978.1	9204.98	9434.23	9668.12	9910.36	10164.4	10414.8	10682.9	10968.1	11268.7	11584.4	11928	12284.3	12655.1	13042.5	13446.3	13845	14261.5	14691.9	15130.1	15572.7
Costa Rica	0	0	0	0	0	0	0	0	0	0	0	0	0	0	0	0	0	0	0	0	0	0	0	0	0	0	0	0	0	0	0	0	0	0	0	0	0	0	0	0	0
Côte d’Ivoire	80507	83673.5	87028.7	90534.1	94127.1	97751.9	101007	104269	107498	110652	113698	115774	117768	119738	121752	123876	126229	128732	131447	134421	137655	141320	145204	149295	153580	158023	161978	166288	170824	175404	179951	184558	189077	193645	198475	203656	208773	214245	220014	225944	231951
Croatia	0	0	0	0	0	0	0	0	0	0	0	0	0	0	0	0	0	0	0	0	0	0	0	0	0	0	0	0	0	0	0	0	0	0	0	0	0	0	0	0	0
Cuba	0	0	0	0	0	0	0	0	0	0	0	0	0	0	0	0	0	0	0	0	0	0	0	0	0	0	0	0	0	0	0	0	0	0	0	0	0	0	0	0	0
Cyprus	0	0	0	0	0	0	0	0	0	0	0	0	0	0	0	0	0	0	0	0	0	0	0	0	0	0	0	0	0	0	0	0	0	0	0	0	0	0	0	0	0
Czech Republic	0	0	0	0	0	0	0	0	0	0	0	0	0	0	0	0	0	0	0	0	0	0	0	0	0	0	0	0	0	0	0	0	0	0	0	0	0	0	0	0	0
Democratic Republic of the Congo	540148	557925	577753	598426	618697	637941	651552	664304	677273	691658	708223	725198	744889	766837	790574	815756	839045	864434	891644	920336	950326	978220	1.00791e+06	1.0393e+06	1.07235e+06	1.10707e+06	1.14007e+06	1.17509e+06	1.21196e+06	1.25055e+06	1.29075e+06	1.32879e+06	1.36899e+06	1.41112e+06	1.45489e+06	1.50015e+06	1.54329e+06	1.58838e+06	1.63527e+06	1.68384e+06	1.73402e+06
Denmark	0	0	0	0	0	0	0	0	0	0	0	0	0	0	0	0	0	0	0	0	0	0	0	0	0	0	0	0	0	0	0	0	0	0	0	0	0	0	0	0	0
Djibouti	0	0	0	0	0	0	0	0	0	0	0	0	0	0	0	0	0	0	0	0	0	0	0	0	0	0	0	0	0	0	0	0	0	0	0	0	0	0	0	0	0
Dominican Republic	0	0	0	0	0	0	0	0	0	0	0	0	0	0	0	0	0	0	0	0	0	0	0	0	0	0	0	0	0	0	0	0	0	0	0	0	0	0	0	0	0
Ecuador	0	0	0	0	0	0	0	0	0	0	0	0	0	0	0	0	0	0	0	0	0	0	0	0	0	0	0	0	0	0	0	0	0	0	0	0	0	0	0	0	0
Egypt	0	0	0	0	0	0	0	0	0	0	0	0	0	0	0	0	0	0	0	0	0	0	0	0	0	0	0	0	0	0	0	0	0	0	0	0	0	0	0	0	0
El Salvador	0	0	0	0	0	0	0	0	0	0	0	0	0	0	0	0	0	0	0	0	0	0	0	0	0	0	0	0	0	0	0	0	0	0	0	0	0	0	0	0	0
Equatorial Guinea	2607.5	2654.51	2707.88	2766.79	2831.15	2901.81	2978.07	3060.64	3152.59	3257.47	3376.73	3496.11	3631.59	3780.09	3936.35	4096.98	4244.11	4395.79	4552.2	4715.6	4886.78	5046.38	5216.84	5394.15	5573.48	5752.36	5918.66	6086.48	6256.02	6428.51	6604.68	6770.4	6941.53	7117.74	7298.26	7482.71	7660.09	7843.85	8033.67	8229.51	8431.16
Eritrea	0	0	0	0	0	0	0	0	0	0	0	0	0	0	0	0	0	0	0	0	0	0	0	0	0	0	0	0	0	0	0	0	0	0	0	0	0	0	0	0	0
Estonia	0	0	0	0	0	0	0	0	0	0	0	0	0	0	0	0	0	0	0	0	0	0	0	0	0	0	0	0	0	0	0	0	0	0	0	0	0	0	0	0	0
Ethiopia	54555.6	56298.6	58232.8	60307.2	62449.4	64611.8	66417.9	68255.2	70149	72152.5	74302.6	76366.6	78626.2	81037.1	83553.1	86165.5	88897.7	91764.8	94790.8	97996.9	101383	104969	108705	112600	116660	120877	125089	129481	133997	138565	143145	147651	152193	156773	161416	166136	170873	175681	180554	185482	190459
Federated States of Micronesia	0	0	0	0	0	0	0	0	0	0	0	0	0	0	0	0	0	0	0	0	0	0	0	0	0	0	0	0	0	0	0	0	0	0	0	0	0	0	0	0	0
Fiji	0	0	0	0	0	0	0	0	0	0	0	0	0	0	0	0	0	0	0	0	0	0	0	0	0	0	0	0	0	0	0	0	0	0	0	0	0	0	0	0	0
Finland	0	0	0	0	0	0	0	0	0	0	0	0	0	0	0	0	0	0	0	0	0	0	0	0	0	0	0	0	0	0	0	0	0	0	0	0	0	0	0	0	0
France	0	0	0	0	0	0	0	0	0	0	0	0	0	0	0	0	0	0	0	0	0	0	0	0	0	0	0	0	0	0	0	0	0	0	0	0	0	0	0	0	0
Gabon	0	0	0	0	0	0	0	0	0	0	0	0	0	0	0	0	0	0	0	0	0	0	0	0	0	0	0	0	0	0	0	0	0	0	0	0	0	0	0	0	0
Georgia	0	0	0	0	0	0	0	0	0	0	0	0	0	0	0	0	0	0	0	0	0	0	0	0	0	0	0	0	0	0	0	0	0	0	0	0	0	0	0	0	0
Germany	0	0	0	0	0	0	0	0	0	0	0	0	0	0	0	0	0	0	0	0	0	0	0	0	0	0	0	0	0	0	0	0	0	0	0	0	0	0	0	0	0
Ghana	60121.4	62106.8	64229	66440.4	68686.5	70934	72943.8	74984	77099.6	79343.6	81753.1	84259.5	86913	89715.6	92677.7	95794.1	98896.5	102213	105659	109105	112462	115517	118464	121359	124297	127350	130389	133549	136818	140170	143581	146899	150284	153742	157275	160877	164364	167928	171541	175165	178772
Greece	0	0	0	0	0	0	0	0	0	0	0	0	0	0	0	0	0	0	0	0	0	0	0	0	0	0	0	0	0	0	0	0	0	0	0	0	0	0	0	0	0
Grenada	0	0	0	0	0	0	0	0	0	0	0	0	0	0	0	0	0	0	0	0	0	0	0	0	0	0	0	0	0	0	0	0	0	0	0	0	0	0	0	0	0
Guatemala	0	0	0	0	0	0	0	0	0	0	0	0	0	0	0	0	0	0	0	0	0	0	0	0	0	0	0	0	0	0	0	0	0	0	0	0	0	0	0	0	0
Guinea	28909.8	30344.6	32045.3	33855.6	35595.7	37162.4	38250.7	39127.7	39877.2	40605	41384.4	42046.8	42771.3	43583.5	44510.2	45565.2	46666.4	47946	49365.8	50879.8	52455.7	53959.7	55549.2	57208.3	58921.1	60678.6	62343.9	64070.7	65862.2	67726.2	69665.9	71538.9	73501.8	75546.9	77665.4	79851	81964.4	84158.8	86428.2	88767.8	91172.4
Guinea-Bissau	2879.2	2959.89	3033.09	3102.29	3176.54	3260.09	3332.74	3415.81	3507.29	3603	3700.94	3794.73	3892.25	3992.82	4096.49	4203.11	4297.67	4396.54	4501.87	4616.61	4742.33	4868.9	5009.68	5158.63	5307.79	5452.65	5581.73	5709.22	5840	5981.38	6137.27	6294.22	6466.08	6648.64	6836.1	7025.27	7203.93	7385.54	7573.39	7772.71	7985.78
Guyana	0	0	0	0	0	0	0	0	0	0	0	0	0	0	0	0	0	0	0	0	0	0	0	0	0	0	0	0	0	0	0	0	0	0	0	0	0	0	0	0	0
Haiti	0	0	0	0	0	0	0	0	0	0	0	0	0	0	0	0	0	0	0	0	0	0	0	0	0	0	0	0	0	0	0	0	0	0	0	0	0	0	0	0	0
Honduras	0	0	0	0	0	0	0	0	0	0	0	0	0	0	0	0	0	0	0	0	0	0	0	0	0	0	0	0	0	0	0	0	0	0	0	0	0	0	0	0	0
Hungary	0	0	0	0	0	0	0	0	0	0	0	0	0	0	0	0	0	0	0	0	0	0	0	0	0	0	0	0	0	0	0	0	0	0	0	0	0	0	0	0	0
Iceland	0	0	0	0	0	0	0	0	0	0	0	0	0	0	0	0	0	0	0	0	0	0	0	0	0	0	0	0	0	0	0	0	0	0	0	0	0	0	0	0	0
India	0	0	0	0	0	0	0	0	0	0	0	0	0	0	0	0	0	0	0	0	0	0	0	0	0	0	0	0	0	0	0	0	0	0	0	0	0	0	0	0	0
Indonesia	0	0	0	0	0	0	0	0	0	0	0	0	0	0	0	0	0	0	0	0	0	0	0	0	0	0	0	0	0	0	0	0	0	0	0	0	0	0	0	0	0
Iran	0	0	0	0	0	0	0	0	0	0	0	0	0	0	0	0	0	0	0	0	0	0	0	0	0	0	0	0	0	0	0	0	0	0	0	0	0	0	0	0	0
Iraq	0	0	0	0	0	0	0	0	0	0	0	0	0	0	0	0	0	0	0	0	0	0	0	0	0	0	0	0	0	0	0	0	0	0	0	0	0	0	0	0	0
Ireland	0	0	0	0	0	0	0	0	0	0	0	0	0	0	0	0	0	0	0	0	0	0	0	0	0	0	0	0	0	0	0	0	0	0	0	0	0	0	0	0	0
Israel	0	0	0	0	0	0	0	0	0	0	0	0	0	0	0	0	0	0	0	0	0	0	0	0	0	0	0	0	0	0	0	0	0	0	0	0	0	0	0	0	0
Italy	0	0	0	0	0	0	0	0	0	0	0	0	0	0	0	0	0	0	0	0	0	0	0	0	0	0	0	0	0	0	0	0	0	0	0	0	0	0	0	0	0
Jamaica	0	0	0	0	0	0	0	0	0	0	0	0	0	0	0	0	0	0	0	0	0	0	0	0	0	0	0	0	0	0	0	0	0	0	0	0	0	0	0	0	0
Japan	0	0	0	0	0	0	0	0	0	0	0	0	0	0	0	0	0	0	0	0	0	0	0	0	0	0	0	0	0	0	0	0	0	0	0	0	0	0	0	0	0
Jordan	0	0	0	0	0	0	0	0	0	0	0	0	0	0	0	0	0	0	0	0	0	0	0	0	0	0	0	0	0	0	0	0	0	0	0	0	0	0	0	0	0
Kazakhstan	0	0	0	0	0	0	0	0	0	0	0	0	0	0	0	0	0	0	0	0	0	0	0	0	0	0	0	0	0	0	0	0	0	0	0	0	0	0	0	0	0
Kenya	0	0	0	0	0	0	0	0	0	0	0	0	0	0	0	0	0	0	0	0	0	0	0	0	0	0	0	0	0	0	0	0	0	0	0	0	0	0	0	0	0
Kiribati	0	0	0	0	0	0	0	0	0	0	0	0	0	0	0	0	0	0	0	0	0	0	0	0	0	0	0	0	0	0	0	0	0	0	0	0	0	0	0	0	0
Kuwait	0	0	0	0	0	0	0	0	0	0	0	0	0	0	0	0	0	0	0	0	0	0	0	0	0	0	0	0	0	0	0	0	0	0	0	0	0	0	0	0	0
Kyrgyzstan	0	0	0	0	0	0	0	0	0	0	0	0	0	0	0	0	0	0	0	0	0	0	0	0	0	0	0	0	0	0	0	0	0	0	0	0	0	0	0	0	0
Laos	0	0	0	0	0	0	0	0	0	0	0	0	0	0	0	0	0	0	0	0	0	0	0	0	0	0	0	0	0	0	0	0	0	0	0	0	0	0	0	0	0
Latvia	0	0	0	0	0	0	0	0	0	0	0	0	0	0	0	0	0	0	0	0	0	0	0	0	0	0	0	0	0	0	0	0	0	0	0	0	0	0	0	0	0
Lebanon	0	0	0	0	0	0	0	0	0	0	0	0	0	0	0	0	0	0	0	0	0	0	0	0	0	0	0	0	0	0	0	0	0	0	0	0	0	0	0	0	0
Lesotho	0	0	0	0	0	0	0	0	0	0	0	0	0	0	0	0	0	0	0	0	0	0	0	0	0	0	0	0	0	0	0	0	0	0	0	0	0	0	0	0	0
Liberia	33227	32702.1	32251.2	32078.3	32425.5	33403.4	35375.4	38128.6	41253.7	44255.1	46830.3	48450.8	49571.8	50465.1	51479.2	52835	54601.2	56738.5	59092	61475	63774.4	65829.4	67783.3	69709.2	71696.5	73801.6	75950.1	78210.6	80573.2	83016.2	85522.1	87999.5	90559.6	93191.7	95883.1	98624.1	101329	104096	106918	109792	112716
Libya	0	0	0	0	0	0	0	0	0	0	0	0	0	0	0	0	0	0	0	0	0	0	0	0	0	0	0	0	0	0	0	0	0	0	0	0	0	0	0	0	0
Lithuania	0	0	0	0	0	0	0	0	0	0	0	0	0	0	0	0	0	0	0	0	0	0	0	0	0	0	0	0	0	0	0	0	0	0	0	0	0	0	0	0	0
Luxembourg	0	0	0	0	0	0	0	0	0	0	0	0	0	0	0	0	0	0	0	0	0	0	0	0	0	0	0	0	0	0	0	0	0	0	0	0	0	0	0	0	0
Macedonia	0	0	0	0	0	0	0	0	0	0	0	0	0	0	0	0	0	0	0	0	0	0	0	0	0	0	0	0	0	0	0	0	0	0	0	0	0	0	0	0	0
Madagascar	0	0	0	0	0	0	0	0	0	0	0	0	0	0	0	0	0	0	0	0	0	0	0	0	0	0	0	0	0	0	0	0	0	0	0	0	0	0	0	0	0
Malawi	14956.4	15251.5	15406.5	15491.2	15595	15774.2	15967.8	16272.6	16652.5	17062.2	17474.9	17863.9	18265.9	18693.3	19160.3	19672.4	20226.6	20812.5	21428.6	22076.8	22757.1	23391.3	24099	24858.6	25638.2	26424.8	27261.3	28080	28909.7	29797	30762.6	31710.9	32751.7	33861.6	34999.9	36146.5	37294.5	38459.5	39649.2	40883.9	42174.6
Malaysia	0	0	0	0	0	0	0	0	0	0	0	0	0	0	0	0	0	0	0	0	0	0	0	0	0	0	0	0	0	0	0	0	0	0	0	0	0	0	0	0	0
Maldives	0	0	0	0	0	0	0	0	0	0	0	0	0	0	0	0	0	0	0	0	0	0	0	0	0	0	0	0	0	0	0	0	0	0	0	0	0	0	0	0	0
Mali	10346.4	10529.6	10758	11022.4	11311.3	11616.7	11887.8	12181.6	12498.5	12840.4	13208.9	13558.9	13945.8	14362.3	14800.7	15256.9	15669	16108.8	16574.1	17063.8	17577.6	18025.7	18503.3	19014.4	19564.9	20159.7	20756.3	21411.4	22118.5	22869.2	23658.8	24433.6	25254.4	26121.8	27038.5	28005.8	28956	29966.5	31031.4	32142.7	33295.9
Malta	0	0	0	0	0	0	0	0	0	0	0	0	0	0	0	0	0	0	0	0	0	0	0	0	0	0	0	0	0	0	0	0	0	0	0	0	0	0	0	0	0
Mauritania	0	0	0	0	0	0	0	0	0	0	0	0	0	0	0	0	0	0	0	0	0	0	0	0	0	0	0	0	0	0	0	0	0	0	0	0	0	0	0	0	0
Mauritius	0	0	0	0	0	0	0	0	0	0	0	0	0	0	0	0	0	0	0	0	0	0	0	0	0	0	0	0	0	0	0	0	0	0	0	0	0	0	0	0	0
Mexico	0	0	0	0	0	0	0	0	0	0	0	0	0	0	0	0	0	0	0	0	0	0	0	0	0	0	0	0	0	0	0	0	0	0	0	0	0	0	0	0	0
Moldova	0	0	0	0	0	0	0	0	0	0	0	0	0	0	0	0	0	0	0	0	0	0	0	0	0	0	0	0	0	0	0	0	0	0	0	0	0	0	0	0	0
Mongolia	0	0	0	0	0	0	0	0	0	0	0	0	0	0	0	0	0	0	0	0	0	0	0	0	0	0	0	0	0	0	0	0	0	0	0	0	0	0	0	0	0
Montenegro	0	0	0	0	0	0	0	0	0	0	0	0	0	0	0	0	0	0	0	0	0	0	0	0	0	0	0	0	0	0	0	0	0	0	0	0	0	0	0	0	0
Morocco	0	0	0	0	0	0	0	0	0	0	0	0	0	0	0	0	0	0	0	0	0	0	0	0	0	0	0	0	0	0	0	0	0	0	0	0	0	0	0	0	0
Mozambique	0	0	0	0	0	0	0	0	0	0	0	0	0	0	0	0	0	0	0	0	0	0	0	0	0	0	0	0	0	0	0	0	0	0	0	0	0	0	0	0	0
Myanmar	0	0	0	0	0	0	0	0	0	0	0	0	0	0	0	0	0	0	0	0	0	0	0	0	0	0	0	0	0	0	0	0	0	0	0	0	0	0	0	0	0
Namibia	0	0	0	0	0	0	0	0	0	0	0	0	0	0	0	0	0	0	0	0	0	0	0	0	0	0	0	0	0	0	0	0	0	0	0	0	0	0	0	0	0
Nepal	0	0	0	0	0	0	0	0	0	0	0	0	0	0	0	0	0	0	0	0	0	0	0	0	0	0	0	0	0	0	0	0	0	0	0	0	0	0	0	0	0
Netherlands	0	0	0	0	0	0	0	0	0	0	0	0	0	0	0	0	0	0	0	0	0	0	0	0	0	0	0	0	0	0	0	0	0	0	0	0	0	0	0	0	0
New Zealand	0	0	0	0	0	0	0	0	0	0	0	0	0	0	0	0	0	0	0	0	0	0	0	0	0	0	0	0	0	0	0	0	0	0	0	0	0	0	0	0	0
Nicaragua	0	0	0	0	0	0	0	0	0	0	0	0	0	0	0	0	0	0	0	0	0	0	0	0	0	0	0	0	0	0	0	0	0	0	0	0	0	0	0	0	0
Niger	1570.68	1615.06	1664	1717.09	1774.19	1835.16	1887.01	1944.47	2006.53	2072.31	2141.46	2201.29	2267.45	2338.79	2414.38	2494	2568.8	2649.52	2736.25	2829.43	2929.42	3027.72	3133.97	3248.4	3371.42	3503.25	3633.17	3774.23	3925.06	4083.95	4250.19	4415.21	4589.45	4773.13	4966.95	5171.41	5375.83	5593.06	5822.61	6063.9	6316.77
Nigeria	395193	405328	416213	427813	440086	452975	464712	477227	490421	504167	518365	530959	544286	558286	572912	588135	602135	617039	632792	649338	666639	683352	700955	719509	739143	759906	779884	801434	824363	848368	873290	898198	924069	951084	979507	1.00941e+06	1.03893e+06	1.07008e+06	1.10271e+06	1.13656e+06	1.17146e+06
North Korea	0	0	0	0	0	0	0	0	0	0	0	0	0	0	0	0	0	0	0	0	0	0	0	0	0	0	0	0	0	0	0	0	0	0	0	0	0	0	0	0	0
Norway	0	0	0	0	0	0	0	0	0	0	0	0	0	0	0	0	0	0	0	0	0	0	0	0	0	0	0	0	0	0	0	0	0	0	0	0	0	0	0	0	0
Oman	0	0	0	0	0	0	0	0	0	0	0	0	0	0	0	0	0	0	0	0	0	0	0	0	0	0	0	0	0	0	0	0	0	0	0	0	0	0	0	0	0
Pakistan	0	0	0	0	0	0	0	0	0	0	0	0	0	0	0	0	0	0	0	0	0	0	0	0	0	0	0	0	0	0	0	0	0	0	0	0	0	0	0	0	0
Palestine	0	0	0	0	0	0	0	0	0	0	0	0	0	0	0	0	0	0	0	0	0	0	0	0	0	0	0	0	0	0	0	0	0	0	0	0	0	0	0	0	0
Panama	0	0	0	0	0	0	0	0	0	0	0	0	0	0	0	0	0	0	0	0	0	0	0	0	0	0	0	0	0	0	0	0	0	0	0	0	0	0	0	0	0
Papua New Guinea	0	0	0	0	0	0	0	0	0	0	0	0	0	0	0	0	0	0	0	0	0	0	0	0	0	0	0	0	0	0	0	0	0	0	0	0	0	0	0	0	0
Paraguay	0	0	0	0	0	0	0	0	0	0	0	0	0	0	0	0	0	0	0	0	0	0	0	0	0	0	0	0	0	0	0	0	0	0	0	0	0	0	0	0	0
Peru	0	0	0	0	0	0	0	0	0	0	0	0	0	0	0	0	0	0	0	0	0	0	0	0	0	0	0	0	0	0	0	0	0	0	0	0	0	0	0	0	0
Philippines	0	0	0	0	0	0	0	0	0	0	0	0	0	0	0	0	0	0	0	0	0	0	0	0	0	0	0	0	0	0	0	0	0	0	0	0	0	0	0	0	0
Poland	0	0	0	0	0	0	0	0	0	0	0	0	0	0	0	0	0	0	0	0	0	0	0	0	0	0	0	0	0	0	0	0	0	0	0	0	0	0	0	0	0
Portugal	0	0	0	0	0	0	0	0	0	0	0	0	0	0	0	0	0	0	0	0	0	0	0	0	0	0	0	0	0	0	0	0	0	0	0	0	0	0	0	0	0
Qatar	0	0	0	0	0	0	0	0	0	0	0	0	0	0	0	0	0	0	0	0	0	0	0	0	0	0	0	0	0	0	0	0	0	0	0	0	0	0	0	0	0
Romania	0	0	0	0	0	0	0	0	0	0	0	0	0	0	0	0	0	0	0	0	0	0	0	0	0	0	0	0	0	0	0	0	0	0	0	0	0	0	0	0	0
Russia	0	0	0	0	0	0	0	0	0	0	0	0	0	0	0	0	0	0	0	0	0	0	0	0	0	0	0	0	0	0	0	0	0	0	0	0	0	0	0	0	0
Rwanda	0	0	0	0	0	0	0	0	0	0	0	0	0	0	0	0	0	0	0	0	0	0	0	0	0	0	0	0	0	0	0	0	0	0	0	0	0	0	0	0	0
Saint Lucia	0	0	0	0	0	0	0	0	0	0	0	0	0	0	0	0	0	0	0	0	0	0	0	0	0	0	0	0	0	0	0	0	0	0	0	0	0	0	0	0	0
Saint Vincent and the Grenadines	0	0	0	0	0	0	0	0	0	0	0	0	0	0	0	0	0	0	0	0	0	0	0	0	0	0	0	0	0	0	0	0	0	0	0	0	0	0	0	0	0
Samoa	0	0	0	0	0	0	0	0	0	0	0	0	0	0	0	0	0	0	0	0	0	0	0	0	0	0	0	0	0	0	0	0	0	0	0	0	0	0	0	0	0
São Tomé and Príncipe	0	0	0	0	0	0	0	0	0	0	0	0	0	0	0	0	0	0	0	0	0	0	0	0	0	0	0	0	0	0	0	0	0	0	0	0	0	0	0	0	0
Saudi Arabia	0	0	0	0	0	0	0	0	0	0	0	0	0	0	0	0	0	0	0	0	0	0	0	0	0	0	0	0	0	0	0	0	0	0	0	0	0	0	0	0	0
Senegal	347.535	359.004	371.389	384.462	397.949	411.717	424.424	437.528	451.153	465.453	480.511	495.492	511.283	527.834	545.085	562.967	580.124	598.181	616.986	636.369	656.263	676.407	697.064	718.309	740.351	763.305	785.81	809.675	834.669	860.418	886.763	913.771	941.188	969.308	998.572	1029.14	1059.63	1091.45	1124.36	1157.92	1191.85
Serbia	0	0	0	0	0	0	0	0	0	0	0	0	0	0	0	0	0	0	0	0	0	0	0	0	0	0	0	0	0	0	0	0	0	0	0	0	0	0	0	0	0
Seychelles	0	0	0	0	0	0	0	0	0	0	0	0	0	0	0	0	0	0	0	0	0	0	0	0	0	0	0	0	0	0	0	0	0	0	0	0	0	0	0	0	0
Sierra Leone	31930.8	32031	31950.5	31795.9	31691.9	31719.4	31752.3	31954.2	32376.1	33074.6	34064.5	35349.6	37022	38901.1	40771.8	42503.4	43815.2	44960.8	46010.4	47060.5	48175.4	49223.9	50310.9	51452.7	52665.5	53952.3	55135.5	56419.3	57781.6	59187.6	60615.1	61912.2	63248.3	64621.7	66034.8	67485.6	68810.9	70185	71599.8	73045.9	74514.8
Singapore	0	0	0	0	0	0	0	0	0	0	0	0	0	0	0	0	0	0	0	0	0	0	0	0	0	0	0	0	0	0	0	0	0	0	0	0	0	0	0	0	0
Slovakia	0	0	0	0	0	0	0	0	0	0	0	0	0	0	0	0	0	0	0	0	0	0	0	0	0	0	0	0	0	0	0	0	0	0	0	0	0	0	0	0	0
Slovenia	0	0	0	0	0	0	0	0	0	0	0	0	0	0	0	0	0	0	0	0	0	0	0	0	0	0	0	0	0	0	0	0	0	0	0	0	0	0	0	0	0
Solomon Islands	0	0	0	0	0	0	0	0	0	0	0	0	0	0	0	0	0	0	0	0	0	0	0	0	0	0	0	0	0	0	0	0	0	0	0	0	0	0	0	0	0
Somalia	0	0	0	0	0	0	0	0	0	0	0	0	0	0	0	0	0	0	0	0	0	0	0	0	0	0	0	0	0	0	0	0	0	0	0	0	0	0	0	0	0
South Africa	0	0	0	0	0	0	0	0	0	0	0	0	0	0	0	0	0	0	0	0	0	0	0	0	0	0	0	0	0	0	0	0	0	0	0	0	0	0	0	0	0
South Korea	0	0	0	0	0	0	0	0	0	0	0	0	0	0	0	0	0	0	0	0	0	0	0	0	0	0	0	0	0	0	0	0	0	0	0	0	0	0	0	0	0
Spain	0	0	0	0	0	0	0	0	0	0	0	0	0	0	0	0	0	0	0	0	0	0	0	0	0	0	0	0	0	0	0	0	0	0	0	0	0	0	0	0	0
Sri Lanka	0	0	0	0	0	0	0	0	0	0	0	0	0	0	0	0	0	0	0	0	0	0	0	0	0	0	0	0	0	0	0	0	0	0	0	0	0	0	0	0	0
Sudan	131630	135695	140143	144883	149804	154830	159416	164192	169163	174340	179743	185080	190695	196608	202868	209494	216030	223056	230466	238116	245925	253615	261450	269490	277835	286530	295143	304130	313428	322941	332607	342030	351665	361487	371485	381651	391592	401742	412083	422600	433281
Suriname	0	0	0	0	0	0	0	0	0	0	0	0	0	0	0	0	0	0	0	0	0	0	0	0	0	0	0	0	0	0	0	0	0	0	0	0	0	0	0	0	0
Swaziland	0	0	0	0	0	0	0	0	0	0	0	0	0	0	0	0	0	0	0	0	0	0	0	0	0	0	0	0	0	0	0	0	0	0	0	0	0	0	0	0	0
Sweden	0	0	0	0	0	0	0	0	0	0	0	0	0	0	0	0	0	0	0	0	0	0	0	0	0	0	0	0	0	0	0	0	0	0	0	0	0	0	0	0	0
Switzerland	0	0	0	0	0	0	0	0	0	0	0	0	0	0	0	0	0	0	0	0	0	0	0	0	0	0	0	0	0	0	0	0	0	0	0	0	0	0	0	0	0
Syria	0	0	0	0	0	0	0	0	0	0	0	0	0	0	0	0	0	0	0	0	0	0	0	0	0	0	0	0	0	0	0	0	0	0	0	0	0	0	0	0	0
Tajikistan	0	0	0	0	0	0	0	0	0	0	0	0	0	0	0	0	0	0	0	0	0	0	0	0	0	0	0	0	0	0	0	0	0	0	0	0	0	0	0	0	0
Tanzania	43857.2	45298.9	46887	48566.5	50268.5	51953.9	53383.5	54793.9	56214	57681.5	59219.2	60677.7	62208.1	63815.7	65504.5	67275.1	69062	70962.1	72962.8	75057.4	77246	79488.4	81886.4	84415.9	87052	89786.7	92614	95532.9	98568.8	101758	105118	108541	112138	115900	119801	123826	127908	132127	136473	140942	145528
Thailand	0	0	0	0	0	0	0	0	0	0	0	0	0	0	0	0	0	0	0	0	0	0	0	0	0	0	0	0	0	0	0	0	0	0	0	0	0	0	0	0	0
The Bahamas	0	0	0	0	0	0	0	0	0	0	0	0	0	0	0	0	0	0	0	0	0	0	0	0	0	0	0	0	0	0	0	0	0	0	0	0	0	0	0	0	0
The Gambia	0	0	0	0	0	0	0	0	0	0	0	0	0	0	0	0	0	0	0	0	0	0	0	0	0	0	0	0	0	0	0	0	0	0	0	0	0	0	0	0	0
Timor-Leste	0	0	0	0	0	0	0	0	0	0	0	0	0	0	0	0	0	0	0	0	0	0	0	0	0	0	0	0	0	0	0	0	0	0	0	0	0	0	0	0	0
Togo	7129.11	7338.28	7560.12	7793.74	8037.81	8292	8547.37	8814.53	9093.88	9385.81	9689.67	9984.71	10292.2	10611.3	10940.6	11278.7	11597.5	11930.4	12275.4	12630.1	12993.1	13346.3	13709.5	14084	14473.3	14879.1	15269.2	15683.9	16119.2	16569	17030.4	17494.8	17968.5	18455.8	18962.6	19490.7	20009.1	20549.9	21109.2	21679.9	22257.4
Tonga	0	0	0	0	0	0	0	0	0	0	0	0	0	0	0	0	0	0	0	0	0	0	0	0	0	0	0	0	0	0	0	0	0	0	0	0	0	0	0	0	0
Trinidad and Tobago	0	0	0	0	0	0	0	0	0	0	0	0	0	0	0	0	0	0	0	0	0	0	0	0	0	0	0	0	0	0	0	0	0	0	0	0	0	0	0	0	0
Tunisia	0	0	0	0	0	0	0	0	0	0	0	0	0	0	0	0	0	0	0	0	0	0	0	0	0	0	0	0	0	0	0	0	0	0	0	0	0	0	0	0	0
Turkey	0	0	0	0	0	0	0	0	0	0	0	0	0	0	0	0	0	0	0	0	0	0	0	0	0	0	0	0	0	0	0	0	0	0	0	0	0	0	0	0	0
Turkmenistan	0	0	0	0	0	0	0	0	0	0	0	0	0	0	0	0	0	0	0	0	0	0	0	0	0	0	0	0	0	0	0	0	0	0	0	0	0	0	0	0	0
Uganda	32635.7	33597.2	34600.3	35642.1	36723.4	37847.9	38824.7	39867.3	40988	42200	43512.4	44871.1	46336.7	47900.9	49558	51304.4	53067.5	54943	56926.5	59012.4	61201.3	63474.5	65868.1	68379.2	71008.7	73757	76528.3	79430.5	82462.9	85625.3	88918	92254.8	95733.3	99348.4	103094	106967	110887	114943	119129	123437	127864
Ukraine	0	0	0	0	0	0	0	0	0	0	0	0	0	0	0	0	0	0	0	0	0	0	0	0	0	0	0	0	0	0	0	0	0	0	0	0	0	0	0	0	0
United Arab Emirates	0	0	0	0	0	0	0	0	0	0	0	0	0	0	0	0	0	0	0	0	0	0	0	0	0	0	0	0	0	0	0	0	0	0	0	0	0	0	0	0	0
United Kingdom	0	0	0	0	0	0	0	0	0	0	0	0	0	0	0	0	0	0	0	0	0	0	0	0	0	0	0	0	0	0	0	0	0	0	0	0	0	0	0	0	0
United States	0	0	0	0	0	0	0	0	0	0	0	0	0	0	0	0	0	0	0	0	0	0	0	0	0	0	0	0	0	0	0	0	0	0	0	0	0	0	0	0	0
Uruguay	0	0	0	0	0	0	0	0	0	0	0	0	0	0	0	0	0	0	0	0	0	0	0	0	0	0	0	0	0	0	0	0	0	0	0	0	0	0	0	0	0
Uzbekistan	0	0	0	0	0	0	0	0	0	0	0	0	0	0	0	0	0	0	0	0	0	0	0	0	0	0	0	0	0	0	0	0	0	0	0	0	0	0	0	0	0
Vanuatu	0	0	0	0	0	0	0	0	0	0	0	0	0	0	0	0	0	0	0	0	0	0	0	0	0	0	0	0	0	0	0	0	0	0	0	0	0	0	0	0	0
Venezuela	0	0	0	0	0	0	0	0	0	0	0	0	0	0	0	0	0	0	0	0	0	0	0	0	0	0	0	0	0	0	0	0	0	0	0	0	0	0	0	0	0
Vietnam	0	0	0	0	0	0	0	0	0	0	0	0	0	0	0	0	0	0	0	0	0	0	0	0	0	0	0	0	0	0	0	0	0	0	0	0	0	0	0	0	0
Yemen	0	0	0	0	0	0	0	0	0	0	0	0	0	0	0	0	0	0	0	0	0	0	0	0	0	0	0	0	0	0	0	0	0	0	0	0	0	0	0	0	0
Zambia	0	0	0	0	0	0	0	0	0	0	0	0	0	0	0	0	0	0	0	0	0	0	0	0	0	0	0	0	0	0	0	0	0	0	0	0	0	0	0	0	0
Zimbabwe	0	0	0	0	0	0	0	0	0	0	0	0	0	0	0	0	0	0	0	0	0	0	0	0	0	0	0	0	0	0	0	0	0	0	0	0	0	0	0	0	0

## Sheet: Input
Input parameters used in the economic analyses
	Brief description	Variable name	Value	References and remarks
	Discount rate for costs	discrate	0	0% used for initial analyses
Distribution of disease across income quintiles
	% in lowest quintile (poorest 20%)	quint1	1
	% in second quintile	quint2	0
	% in third quintile	quint3	0
	% in fourth quintile	quint4	0
	% in fifth quintile (richest 20%)	quint5	0
	Error check to ensure %'s total 100%
Distribution of skin disease
	Mild Skin disease		0.679	Wilma case mix 15+
	Moderate Skin disease		0.321	Wilma case mix 15+
	Error check to ensure %'s total 100%
Productivity loss
	Mild Skin Disease (minimum)	PL_MIN_mild	0	assumption
	Mild Skin Disease (maximum)	PL_MAX_mild
	Moderate Skin Disease (minimum)	PL_MIN_moderate	0.1	Kim et al. 1997
	Moderate Skin Disease (maximum)	PL_MAX_moderate
Weighted average productivity loss
	Minimum estimate of productivity loss	Mean_MIN_PL	0.0321
	Maximum estimate of productivity loss	Mean_MAX_PL
		prodloss	0.0321

## Sheet: Total cases 15+
	1990	1991	1992	1993	1994	1995	1996	1997	1998	1999	2000	2001	2002	2003	2004	2005	2006	2007	2008	2009	2010	2011	2012	2013	2014	2015	2016	2017	2018	2019	2020	2021	2022	2023	2024	2025	2026	2027	2028	2029	2030
WORLD
Men	2.27103e+06	2.33811e+06	2.41066e+06	2.48713e+06	2.56594e+06	2.64617e+06	2.71643e+06	2.78873e+06	2.86393e+06	2.94292e+06	3.02626e+06	3.10679e+06	3.19293e+06	3.28427e+06	3.38056e+06	3.48166e+06	3.58044e+06	3.68594e+06	3.79733e+06	3.91353e+06	4.03392e+06	4.15172e+06	4.27456e+06	4.40254e+06	4.5361e+06	4.67545e+06	4.81188e+06	4.95558e+06	5.10589e+06	5.26188e+06	5.42307e+06	5.58259e+06	5.74822e+06	5.91994e+06	6.09788e+06	6.282e+06	6.46392e+06	6.65289e+06	6.84839e+06	7.04972e+06	7.25643e+06
Women	1.94209e+06	1.99843e+06	2.05938e+06	2.12346e+06	2.18912e+06	2.25547e+06	2.3133e+06	2.37229e+06	2.43334e+06	2.49745e+06	2.56526e+06	2.63182e+06	2.70318e+06	2.77892e+06	2.85872e+06	2.94237e+06	3.02494e+06	3.11292e+06	3.20558e+06	3.30204e+06	3.40178e+06	3.49953e+06	3.60127e+06	3.70706e+06	3.81727e+06	3.93209e+06	4.04554e+06	4.16483e+06	4.28941e+06	4.41859e+06	4.552e+06	4.68485e+06	4.82268e+06	4.96543e+06	5.1132e+06	5.26596e+06	5.41795e+06	5.57564e+06	5.7386e+06	5.9063e+06	6.0784e+06
Total	4.21311e+06	4.33654e+06	4.47003e+06	4.61059e+06	4.75505e+06	4.90164e+06	5.02973e+06	5.16103e+06	5.29727e+06	5.44037e+06	5.59152e+06	5.73861e+06	5.89611e+06	6.06318e+06	6.23928e+06	6.42403e+06	6.60538e+06	6.79886e+06	7.00291e+06	7.21557e+06	7.43571e+06	7.65126e+06	7.87584e+06	8.10961e+06	8.35337e+06	8.60754e+06	8.85742e+06	9.12041e+06	9.39529e+06	9.68046e+06	9.97507e+06	1.02674e+07	1.05709e+07	1.08854e+07	1.12111e+07	1.1548e+07	1.18819e+07	1.22285e+07	1.2587e+07	1.2956e+07	1.33348e+07
MEN
Afghanistan	0	0	0	0	0	0	0	0	0	0	0	0	0	0	0	0	0	0	0	0	0	0	0	0	0	0	0	0	0	0	0	0	0	0	0	0	0	0	0	0	0
Albania	0	0	0	0	0	0	0	0	0	0	0	0	0	0	0	0	0	0	0	0	0	0	0	0	0	0	0	0	0	0	0	0	0	0	0	0	0	0	0	0	0
Algeria	0	0	0	0	0	0	0	0	0	0	0	0	0	0	0	0	0	0	0	0	0	0	0	0	0	0	0	0	0	0	0	0	0	0	0	0	0	0	0	0	0
Angola	10292.2	10569.5	10896.7	11258.4	11635.4	12016.8	12333.9	12661.8	13011.9	13398.1	13827.2	14254.9	14737.9	15263.9	15819.3	16395.7	16932.3	17499	18095.6	18725.2	19390.8	20025.5	20712.5	21447.4	22222.6	23034.7	23852.9	24702.9	25591.3	26528.8	27518.2	28470.2	29483.4	30547.8	31647	32772.4	33868.5	35000.6	36168.1	37375.1	38623.5
Antigua and Barbuda	0	0	0	0	0	0	0	0	0	0	0	0	0	0	0	0	0	0	0	0	0	0	0	0	0	0	0	0	0	0	0	0	0	0	0	0	0	0	0	0	0
Argentina	0	0	0	0	0	0	0	0	0	0	0	0	0	0	0	0	0	0	0	0	0	0	0	0	0	0	0	0	0	0	0	0	0	0	0	0	0	0	0	0	0
Armenia	0	0	0	0	0	0	0	0	0	0	0	0	0	0	0	0	0	0	0	0	0	0	0	0	0	0	0	0	0	0	0	0	0	0	0	0	0	0	0	0	0
Australia	0	0	0	0	0	0	0	0	0	0	0	0	0	0	0	0	0	0	0	0	0	0	0	0	0	0	0	0	0	0	0	0	0	0	0	0	0	0	0	0	0
Austria	0	0	0	0	0	0	0	0	0	0	0	0	0	0	0	0	0	0	0	0	0	0	0	0	0	0	0	0	0	0	0	0	0	0	0	0	0	0	0	0	0
Azerbaijan	0	0	0	0	0	0	0	0	0	0	0	0	0	0	0	0	0	0	0	0	0	0	0	0	0	0	0	0	0	0	0	0	0	0	0	0	0	0	0	0	0
Bahrain	0	0	0	0	0	0	0	0	0	0	0	0	0	0	0	0	0	0	0	0	0	0	0	0	0	0	0	0	0	0	0	0	0	0	0	0	0	0	0	0	0
Bangladesh	0	0	0	0	0	0	0	0	0	0	0	0	0	0	0	0	0	0	0	0	0	0	0	0	0	0	0	0	0	0	0	0	0	0	0	0	0	0	0	0	0
Barbados	0	0	0	0	0	0	0	0	0	0	0	0	0	0	0	0	0	0	0	0	0	0	0	0	0	0	0	0	0	0	0	0	0	0	0	0	0	0	0	0	0
Belarus	0	0	0	0	0	0	0	0	0	0	0	0	0	0	0	0	0	0	0	0	0	0	0	0	0	0	0	0	0	0	0	0	0	0	0	0	0	0	0	0	0
Belgium	0	0	0	0	0	0	0	0	0	0	0	0	0	0	0	0	0	0	0	0	0	0	0	0	0	0	0	0	0	0	0	0	0	0	0	0	0	0	0	0	0
Belize	0	0	0	0	0	0	0	0	0	0	0	0	0	0	0	0	0	0	0	0	0	0	0	0	0	0	0	0	0	0	0	0	0	0	0	0	0	0	0	0	0
Benin	42526.1	44264.7	46209.3	48284.7	50395	52477.3	54091	55680.8	57308.3	59060.6	60999.8	63256.2	65729.4	68379.1	71152.1	74008.1	76701.9	79505.4	82400.6	85372.2	88416	91311.5	94284.8	97349.6	100526	103828	107135	110573	114137	117820	121612	125351	129217	133196	137270	141429	145513	149697	153974	158341	162794
Bhutan	0	0	0	0	0	0	0	0	0	0	0	0	0	0	0	0	0	0	0	0	0	0	0	0	0	0	0	0	0	0	0	0	0	0	0	0	0	0	0	0	0
Bolivia	0	0	0	0	0	0	0	0	0	0	0	0	0	0	0	0	0	0	0	0	0	0	0	0	0	0	0	0	0	0	0	0	0	0	0	0	0	0	0	0	0
Bosnia and Herzegovina	0	0	0	0	0	0	0	0	0	0	0	0	0	0	0	0	0	0	0	0	0	0	0	0	0	0	0	0	0	0	0	0	0	0	0	0	0	0	0	0	0
Botswana	0	0	0	0	0	0	0	0	0	0	0	0	0	0	0	0	0	0	0	0	0	0	0	0	0	0	0	0	0	0	0	0	0	0	0	0	0	0	0	0	0
Brazil	0	0	0	0	0	0	0	0	0	0	0	0	0	0	0	0	0	0	0	0	0	0	0	0	0	0	0	0	0	0	0	0	0	0	0	0	0	0	0	0	0
Brunei	0	0	0	0	0	0	0	0	0	0	0	0	0	0	0	0	0	0	0	0	0	0	0	0	0	0	0	0	0	0	0	0	0	0	0	0	0	0	0	0	0
Bulgaria	0	0	0	0	0	0	0	0	0	0	0	0	0	0	0	0	0	0	0	0	0	0	0	0	0	0	0	0	0	0	0	0	0	0	0	0	0	0	0	0	0
Burkina Faso	42864.3	43932.1	45090.9	46341.5	47683	49112.5	50471.2	51942.1	53515.4	55178.1	56924.5	58632	60456.8	62393.4	64439.4	66595.6	68725.1	70994.8	73398.4	75932.4	78596.3	81199.6	83970.5	86898.4	89970.8	93182.8	96367.8	99708.7	103206	106862	110678	114435	118374	122479	126729	131110	135405	139856	144457	149201	154085
Burundi	24218.1	24500	24785.2	25083	25401.4	25754.1	26128.3	26529.2	26999	27588	28327.4	29521.2	30882.8	32375.4	33941.7	35534.8	37100.3	38689.8	40287.9	41882.8	43464.5	44710.1	45982.9	47280.5	48608.7	49983.5	51341.2	52773.9	54290.6	55909	57640.9	59385.8	61259.6	63261.6	65383.3	67618.4	69871.1	72238.6	74716.9	77296.1	79964.7
Cambodia	0	0	0	0	0	0	0	0	0	0	0	0	0	0	0	0	0	0	0	0	0	0	0	0	0	0	0	0	0	0	0	0	0	0	0	0	0	0	0	0	0
Cameroon	170515	175268	180288	185583	191188	197120	202853	208950	215396	222149	229176	235948	242991	250325	257987	265989	273685	281856	290425	299290	308407	317340	326619	336249	346272	356708	367036	377825	389057	400706	412754	424679	437067	449893	463126	476741	490256	504200	518551	533283	548376
Canada	0	0	0	0	0	0	0	0	0	0	0	0	0	0	0	0	0	0	0	0	0	0	0	0	0	0	0	0	0	0	0	0	0	0	0	0	0	0	0	0	0
Cape Verde	0	0	0	0	0	0	0	0	0	0	0	0	0	0	0	0	0	0	0	0	0	0	0	0	0	0	0	0	0	0	0	0	0	0	0	0	0	0	0	0	0
Central African Republic	56283.7	57477.4	58862	60393.1	62004.2	63648.5	65111.6	66586.8	68081.6	69615.9	71197.5	72417.2	73723.9	75115.5	76587.8	78153.6	79842.5	81683.2	83660.6	85757.5	87955.2	90168.5	92456.2	94826.6	97298.8	99875.9	102255	104800	107461	110172	112905	115564	118269	121034	123894	126868	129774	132807	135952	139181	142478
Chad	32797.7	33669.7	34599.2	35593.8	36664.5	37818.4	38908.8	40107.2	41419.5	42852.3	44407.4	45964.5	47673.6	49494.8	51386.1	53326.6	55109.2	56939.6	58839.3	60835.2	62945.6	64994.2	67180.2	69495.9	71932	74484.1	76984	79629.3	82421	85362.7	88455.3	91520.8	94773.4	98193.5	101759	105457	109110	112918	116878	120986	125243
Chile	0	0	0	0	0	0	0	0	0	0	0	0	0	0	0	0	0	0	0	0	0	0	0	0	0	0	0	0	0	0	0	0	0	0	0	0	0	0	0	0	0
China	0	0	0	0	0	0	0	0	0	0	0	0	0	0	0	0	0	0	0	0	0	0	0	0	0	0	0	0	0	0	0	0	0	0	0	0	0	0	0	0	0
Colombia	0	0	0	0	0	0	0	0	0	0	0	0	0	0	0	0	0	0	0	0	0	0	0	0	0	0	0	0	0	0	0	0	0	0	0	0	0	0	0	0	0
Comoros	0	0	0	0	0	0	0	0	0	0	0	0	0	0	0	0	0	0	0	0	0	0	0	0	0	0	0	0	0	0	0	0	0	0	0	0	0	0	0	0	0
Congo	7022.66	7231.86	7451.06	7681.04	7922.05	8173.81	8430.46	8697.68	8971.59	9247.95	9523.93	9756.4	9991.91	10235.8	10494.9	10774.5	11095.6	11440.6	11802.3	12172.3	12544.1	12863.8	13185.4	13512.4	13850.5	14204.8	14557.2	14934.2	15334.8	15756.8	16199.4	16682.5	17182.8	17703.1	18247.6	18816.4	19379.7	19969	20579.3	21202.9	21835.7
Costa Rica	0	0	0	0	0	0	0	0	0	0	0	0	0	0	0	0	0	0	0	0	0	0	0	0	0	0	0	0	0	0	0	0	0	0	0	0	0	0	0	0	0
Côte d’Ivoire	114613	118748	123126	127700	132387	137108	141204	145267	149220	152981	156496	158735	160719	162560	164396	166353	168941	171710	174721	178008	181555	185796	190248	194891	199716	204680	209208	214113	219240	224368	229414	234789	239996	245202	250674	256528	262577	269008	275755	282663	289639
Croatia	0	0	0	0	0	0	0	0	0	0	0	0	0	0	0	0	0	0	0	0	0	0	0	0	0	0	0	0	0	0	0	0	0	0	0	0	0	0	0	0	0
Cuba	0	0	0	0	0	0	0	0	0	0	0	0	0	0	0	0	0	0	0	0	0	0	0	0	0	0	0	0	0	0	0	0	0	0	0	0	0	0	0	0	0
Cyprus	0	0	0	0	0	0	0	0	0	0	0	0	0	0	0	0	0	0	0	0	0	0	0	0	0	0	0	0	0	0	0	0	0	0	0	0	0	0	0	0	0
Czech Republic	0	0	0	0	0	0	0	0	0	0	0	0	0	0	0	0	0	0	0	0	0	0	0	0	0	0	0	0	0	0	0	0	0	0	0	0	0	0	0	0	0
Democratic Republic of the Congo	645999	668655	693753	719866	745525	770012	787695	804239	820963	839305	860169	882068	907119	934789	964558	996039	1.02532e+06	1.0571e+06	1.09104e+06	1.12671e+06	1.16386e+06	1.19874e+06	1.23561e+06	1.27437e+06	1.31504e+06	1.35762e+06	1.39805e+06	1.44082e+06	1.48578e+06	1.53276e+06	1.58166e+06	1.62803e+06	1.67695e+06	1.72817e+06	1.7814e+06	1.8365e+06	1.88918e+06	1.94424e+06	2.00151e+06	2.0609e+06	2.12231e+06
Denmark	0	0	0	0	0	0	0	0	0	0	0	0	0	0	0	0	0	0	0	0	0	0	0	0	0	0	0	0	0	0	0	0	0	0	0	0	0	0	0	0	0
Djibouti	0	0	0	0	0	0	0	0	0	0	0	0	0	0	0	0	0	0	0	0	0	0	0	0	0	0	0	0	0	0	0	0	0	0	0	0	0	0	0	0	0
Dominican Republic	0	0	0	0	0	0	0	0	0	0	0	0	0	0	0	0	0	0	0	0	0	0	0	0	0	0	0	0	0	0	0	0	0	0	0	0	0	0	0	0	0
Ecuador	0	0	0	0	0	0	0	0	0	0	0	0	0	0	0	0	0	0	0	0	0	0	0	0	0	0	0	0	0	0	0	0	0	0	0	0	0	0	0	0	0
Egypt	0	0	0	0	0	0	0	0	0	0	0	0	0	0	0	0	0	0	0	0	0	0	0	0	0	0	0	0	0	0	0	0	0	0	0	0	0	0	0	0	0
El Salvador	0	0	0	0	0	0	0	0	0	0	0	0	0	0	0	0	0	0	0	0	0	0	0	0	0	0	0	0	0	0	0	0	0	0	0	0	0	0	0	0	0
Equatorial Guinea	3526.21	3593.95	3671.44	3756.87	3848.76	3947.02	4053.12	4166.22	4290.05	4429.15	4585.23	4741.56	4917.13	5107.61	5305.87	5507.2	5688.62	5873.6	6062.84	6259.19	6463.99	6653.93	6857.19	7069.94	7287.52	7508	7719.17	7934.72	8155.93	8385.69	8625.49	8856.74	9099.47	9352.38	9613.4	9881.24	10141.2	10409.5	10685.5	10969.1	11259.6
Eritrea	0	0	0	0	0	0	0	0	0	0	0	0	0	0	0	0	0	0	0	0	0	0	0	0	0	0	0	0	0	0	0	0	0	0	0	0	0	0	0	0	0
Estonia	0	0	0	0	0	0	0	0	0	0	0	0	0	0	0	0	0	0	0	0	0	0	0	0	0	0	0	0	0	0	0	0	0	0	0	0	0	0	0	0	0
Ethiopia	71537.5	73797.8	76230.4	78800	81463.1	84189.7	86715.9	89279.8	91901.2	94638.6	97541.3	100296	103318	106550	109923	113423	117070	120897	124955	129291	133911	138795	143908	149239	154767	160467	166114	171959	177956	184056	190230	196329	202525	208804	215168	221621	228057	234572	241174	247872	254669
Federated States of Micronesia	0	0	0	0	0	0	0	0	0	0	0	0	0	0	0	0	0	0	0	0	0	0	0	0	0	0	0	0	0	0	0	0	0	0	0	0	0	0	0	0	0
Fiji	0	0	0	0	0	0	0	0	0	0	0	0	0	0	0	0	0	0	0	0	0	0	0	0	0	0	0	0	0	0	0	0	0	0	0	0	0	0	0	0	0
Finland	0	0	0	0	0	0	0	0	0	0	0	0	0	0	0	0	0	0	0	0	0	0	0	0	0	0	0	0	0	0	0	0	0	0	0	0	0	0	0	0	0
France	0	0	0	0	0	0	0	0	0	0	0	0	0	0	0	0	0	0	0	0	0	0	0	0	0	0	0	0	0	0	0	0	0	0	0	0	0	0	0	0	0
Gabon	0	0	0	0	0	0	0	0	0	0	0	0	0	0	0	0	0	0	0	0	0	0	0	0	0	0	0	0	0	0	0	0	0	0	0	0	0	0	0	0	0
Georgia	0	0	0	0	0	0	0	0	0	0	0	0	0	0	0	0	0	0	0	0	0	0	0	0	0	0	0	0	0	0	0	0	0	0	0	0	0	0	0	0	0
Germany	0	0	0	0	0	0	0	0	0	0	0	0	0	0	0	0	0	0	0	0	0	0	0	0	0	0	0	0	0	0	0	0	0	0	0	0	0	0	0	0	0
Ghana	80197.7	82618.6	85138.6	87737.4	90398.9	93118.1	95674.8	98317.5	101049	103858	106738	109627	112541	115516	118606	121836	124980	128326	131839	135448	139115	142856	146677	150563	154523	158567	162729	166971	171307	175751	180308	184966	189720	194569	199505	204515	209523	214606	219743	224906	230077
Greece	0	0	0	0	0	0	0	0	0	0	0	0	0	0	0	0	0	0	0	0	0	0	0	0	0	0	0	0	0	0	0	0	0	0	0	0	0	0	0	0	0
Grenada	0	0	0	0	0	0	0	0	0	0	0	0	0	0	0	0	0	0	0	0	0	0	0	0	0	0	0	0	0	0	0	0	0	0	0	0	0	0	0	0	0
Guatemala	0	0	0	0	0	0	0	0	0	0	0	0	0	0	0	0	0	0	0	0	0	0	0	0	0	0	0	0	0	0	0	0	0	0	0	0	0	0	0	0	0
Guinea	38418.4	40397.3	42739.9	45241.2	47664.4	49875.1	51441.5	52714.6	53807.1	54861.5	55976.3	56985.9	58058.7	59225.4	60517.1	61949.5	63524.4	65311.9	67262.5	69316	71432.8	73514.6	75689	77948.4	80288.5	82707.7	85107	87593.2	90164.2	92820.8	95562.6	98276.3	101088	103991	106973	110029	113046	116146	119324	122576	125898
Guinea-Bissau	3982.6	4090.94	4188.18	4279.25	4376.75	4486.68	4584.46	4696.64	4820.37	4949.74	5082.14	5213.45	5350	5490.85	5635.94	5784.91	5918.6	6058.33	6206.01	6364.13	6534.45	6705.5	6892.72	7092.07	7298.67	7509.52	7709.05	7914.98	8127.79	8348.8	8578.82	8800.96	9033.56	9275.3	9524.64	9780.65	10026.6	10281.4	10544.5	10815.8	11094.7
Guyana	0	0	0	0	0	0	0	0	0	0	0	0	0	0	0	0	0	0	0	0	0	0	0	0	0	0	0	0	0	0	0	0	0	0	0	0	0	0	0	0	0
Haiti	0	0	0	0	0	0	0	0	0	0	0	0	0	0	0	0	0	0	0	0	0	0	0	0	0	0	0	0	0	0	0	0	0	0	0	0	0	0	0	0	0
Honduras	0	0	0	0	0	0	0	0	0	0	0	0	0	0	0	0	0	0	0	0	0	0	0	0	0	0	0	0	0	0	0	0	0	0	0	0	0	0	0	0	0
Hungary	0	0	0	0	0	0	0	0	0	0	0	0	0	0	0	0	0	0	0	0	0	0	0	0	0	0	0	0	0	0	0	0	0	0	0	0	0	0	0	0	0
Iceland	0	0	0	0	0	0	0	0	0	0	0	0	0	0	0	0	0	0	0	0	0	0	0	0	0	0	0	0	0	0	0	0	0	0	0	0	0	0	0	0	0
India	0	0	0	0	0	0	0	0	0	0	0	0	0	0	0	0	0	0	0	0	0	0	0	0	0	0	0	0	0	0	0	0	0	0	0	0	0	0	0	0	0
Indonesia	0	0	0	0	0	0	0	0	0	0	0	0	0	0	0	0	0	0	0	0	0	0	0	0	0	0	0	0	0	0	0	0	0	0	0	0	0	0	0	0	0
Iran	0	0	0	0	0	0	0	0	0	0	0	0	0	0	0	0	0	0	0	0	0	0	0	0	0	0	0	0	0	0	0	0	0	0	0	0	0	0	0	0	0
Iraq	0	0	0	0	0	0	0	0	0	0	0	0	0	0	0	0	0	0	0	0	0	0	0	0	0	0	0	0	0	0	0	0	0	0	0	0	0	0	0	0	0
Ireland	0	0	0	0	0	0	0	0	0	0	0	0	0	0	0	0	0	0	0	0	0	0	0	0	0	0	0	0	0	0	0	0	0	0	0	0	0	0	0	0	0
Israel	0	0	0	0	0	0	0	0	0	0	0	0	0	0	0	0	0	0	0	0	0	0	0	0	0	0	0	0	0	0	0	0	0	0	0	0	0	0	0	0	0
Italy	0	0	0	0	0	0	0	0	0	0	0	0	0	0	0	0	0	0	0	0	0	0	0	0	0	0	0	0	0	0	0	0	0	0	0	0	0	0	0	0	0
Jamaica	0	0	0	0	0	0	0	0	0	0	0	0	0	0	0	0	0	0	0	0	0	0	0	0	0	0	0	0	0	0	0	0	0	0	0	0	0	0	0	0	0
Japan	0	0	0	0	0	0	0	0	0	0	0	0	0	0	0	0	0	0	0	0	0	0	0	0	0	0	0	0	0	0	0	0	0	0	0	0	0	0	0	0	0
Jordan	0	0	0	0	0	0	0	0	0	0	0	0	0	0	0	0	0	0	0	0	0	0	0	0	0	0	0	0	0	0	0	0	0	0	0	0	0	0	0	0	0
Kazakhstan	0	0	0	0	0	0	0	0	0	0	0	0	0	0	0	0	0	0	0	0	0	0	0	0	0	0	0	0	0	0	0	0	0	0	0	0	0	0	0	0	0
Kenya	0	0	0	0	0	0	0	0	0	0	0	0	0	0	0	0	0	0	0	0	0	0	0	0	0	0	0	0	0	0	0	0	0	0	0	0	0	0	0	0	0
Kiribati	0	0	0	0	0	0	0	0	0	0	0	0	0	0	0	0	0	0	0	0	0	0	0	0	0	0	0	0	0	0	0	0	0	0	0	0	0	0	0	0	0
Kuwait	0	0	0	0	0	0	0	0	0	0	0	0	0	0	0	0	0	0	0	0	0	0	0	0	0	0	0	0	0	0	0	0	0	0	0	0	0	0	0	0	0
Kyrgyzstan	0	0	0	0	0	0	0	0	0	0	0	0	0	0	0	0	0	0	0	0	0	0	0	0	0	0	0	0	0	0	0	0	0	0	0	0	0	0	0	0	0
Laos	0	0	0	0	0	0	0	0	0	0	0	0	0	0	0	0	0	0	0	0	0	0	0	0	0	0	0	0	0	0	0	0	0	0	0	0	0	0	0	0	0
Latvia	0	0	0	0	0	0	0	0	0	0	0	0	0	0	0	0	0	0	0	0	0	0	0	0	0	0	0	0	0	0	0	0	0	0	0	0	0	0	0	0	0
Lebanon	0	0	0	0	0	0	0	0	0	0	0	0	0	0	0	0	0	0	0	0	0	0	0	0	0	0	0	0	0	0	0	0	0	0	0	0	0	0	0	0	0
Lesotho	0	0	0	0	0	0	0	0	0	0	0	0	0	0	0	0	0	0	0	0	0	0	0	0	0	0	0	0	0	0	0	0	0	0	0	0	0	0	0	0	0
Liberia	43986	43307.8	42715.3	42485.4	42945.5	44242.2	46927	50686.2	54971	59117.8	62723	64978.7	66552.3	67813.3	69235.1	71115.2	73611.3	76620.6	79924.8	83259.7	86470.2	89354	92079.6	94759.3	97532.6	100486	103559	106792	110172	113668	117257	120847	124553	128360	132247	136201	140148	144174	148274	152446	156690
Libya	0	0	0	0	0	0	0	0	0	0	0	0	0	0	0	0	0	0	0	0	0	0	0	0	0	0	0	0	0	0	0	0	0	0	0	0	0	0	0	0	0
Lithuania	0	0	0	0	0	0	0	0	0	0	0	0	0	0	0	0	0	0	0	0	0	0	0	0	0	0	0	0	0	0	0	0	0	0	0	0	0	0	0	0	0
Luxembourg	0	0	0	0	0	0	0	0	0	0	0	0	0	0	0	0	0	0	0	0	0	0	0	0	0	0	0	0	0	0	0	0	0	0	0	0	0	0	0	0	0
Macedonia	0	0	0	0	0	0	0	0	0	0	0	0	0	0	0	0	0	0	0	0	0	0	0	0	0	0	0	0	0	0	0	0	0	0	0	0	0	0	0	0	0
Madagascar	0	0	0	0	0	0	0	0	0	0	0	0	0	0	0	0	0	0	0	0	0	0	0	0	0	0	0	0	0	0	0	0	0	0	0	0	0	0	0	0	0
Malawi	19013.4	19539.9	19883.3	20132	20400.5	20762.4	21059	21504.1	22048.9	22633.5	23223.8	23798.7	24393.1	25023.6	25708.9	26456.5	27270.5	28126	29026.5	29982.4	30998.2	31966.4	33050.7	34214.4	35403.2	36593.2	37855.1	39080.9	40315.7	41631.7	43061.2	44464.5	45997.1	47624.3	49285.7	50951	52604.2	54273.8	55968.4	57713.7	59523.6
Malaysia	0	0	0	0	0	0	0	0	0	0	0	0	0	0	0	0	0	0	0	0	0	0	0	0	0	0	0	0	0	0	0	0	0	0	0	0	0	0	0	0	0
Maldives	0	0	0	0	0	0	0	0	0	0	0	0	0	0	0	0	0	0	0	0	0	0	0	0	0	0	0	0	0	0	0	0	0	0	0	0	0	0	0	0	0
Mali	10843.7	11048.4	11310	11615.9	11949.5	12299.1	12615.4	12953.7	13315	13702.3	14118.5	14528.8	14976.8	15457	15963.8	16494.7	16998.2	17535.1	18098.8	18682.3	19282.2	19795	20328.4	20891.1	21495.3	22150.5	22829.3	23575.2	24380	25232.6	26126.8	27013	27948.4	28934.4	29975.1	31073.3	32159	33312	34526.8	35796.2	37116.8
Malta	0	0	0	0	0	0	0	0	0	0	0	0	0	0	0	0	0	0	0	0	0	0	0	0	0	0	0	0	0	0	0	0	0	0	0	0	0	0	0	0	0
Mauritania	0	0	0	0	0	0	0	0	0	0	0	0	0	0	0	0	0	0	0	0	0	0	0	0	0	0	0	0	0	0	0	0	0	0	0	0	0	0	0	0	0
Mauritius	0	0	0	0	0	0	0	0	0	0	0	0	0	0	0	0	0	0	0	0	0	0	0	0	0	0	0	0	0	0	0	0	0	0	0	0	0	0	0	0	0
Mexico	0	0	0	0	0	0	0	0	0	0	0	0	0	0	0	0	0	0	0	0	0	0	0	0	0	0	0	0	0	0	0	0	0	0	0	0	0	0	0	0	0
Moldova	0	0	0	0	0	0	0	0	0	0	0	0	0	0	0	0	0	0	0	0	0	0	0	0	0	0	0	0	0	0	0	0	0	0	0	0	0	0	0	0	0
Mongolia	0	0	0	0	0	0	0	0	0	0	0	0	0	0	0	0	0	0	0	0	0	0	0	0	0	0	0	0	0	0	0	0	0	0	0	0	0	0	0	0	0
Montenegro	0	0	0	0	0	0	0	0	0	0	0	0	0	0	0	0	0	0	0	0	0	0	0	0	0	0	0	0	0	0	0	0	0	0	0	0	0	0	0	0	0
Morocco	0	0	0	0	0	0	0	0	0	0	0	0	0	0	0	0	0	0	0	0	0	0	0	0	0	0	0	0	0	0	0	0	0	0	0	0	0	0	0	0	0
Mozambique	0	0	0	0	0	0	0	0	0	0	0	0	0	0	0	0	0	0	0	0	0	0	0	0	0	0	0	0	0	0	0	0	0	0	0	0	0	0	0	0	0
Myanmar	0	0	0	0	0	0	0	0	0	0	0	0	0	0	0	0	0	0	0	0	0	0	0	0	0	0	0	0	0	0	0	0	0	0	0	0	0	0	0	0	0
Namibia	0	0	0	0	0	0	0	0	0	0	0	0	0	0	0	0	0	0	0	0	0	0	0	0	0	0	0	0	0	0	0	0	0	0	0	0	0	0	0	0	0
Nepal	0	0	0	0	0	0	0	0	0	0	0	0	0	0	0	0	0	0	0	0	0	0	0	0	0	0	0	0	0	0	0	0	0	0	0	0	0	0	0	0	0
Netherlands	0	0	0	0	0	0	0	0	0	0	0	0	0	0	0	0	0	0	0	0	0	0	0	0	0	0	0	0	0	0	0	0	0	0	0	0	0	0	0	0	0
New Zealand	0	0	0	0	0	0	0	0	0	0	0	0	0	0	0	0	0	0	0	0	0	0	0	0	0	0	0	0	0	0	0	0	0	0	0	0	0	0	0	0	0
Nicaragua	0	0	0	0	0	0	0	0	0	0	0	0	0	0	0	0	0	0	0	0	0	0	0	0	0	0	0	0	0	0	0	0	0	0	0	0	0	0	0	0	0
Niger	1640.71	1693.42	1755.75	1825.81	1901.41	1981.44	2063.99	2149.15	2236.12	2324.9	2416.33	2496.16	2582.43	2673.5	2767.91	2865.84	2963.84	3066.99	3175.33	3289.67	3411.14	3536.49	3669.89	3810.99	3959.51	4115.82	4274.04	4442.33	4619.6	4804.8	4998.1	5195.2	5402.01	5618.53	5845.47	6083.94	6327.79	6585.14	6855.37	7137.94	7433.32
Nigeria	531633	545794	560773	576572	593192	610600	627056	644476	662720	681600	700980	718878	737587	757027	777156	797960	818213	839542	861841	885000	908967	933036	958062	984131	1.01143e+06	1.04005e+06	1.06854e+06	1.09893e+06	1.13096e+06	1.16427e+06	1.19871e+06	1.23429e+06	1.271e+06	1.3091e+06	1.34892e+06	1.39062e+06	1.4331e+06	1.47756e+06	1.52382e+06	1.57157e+06	1.6206e+06
North Korea	0	0	0	0	0	0	0	0	0	0	0	0	0	0	0	0	0	0	0	0	0	0	0	0	0	0	0	0	0	0	0	0	0	0	0	0	0	0	0	0	0
Norway	0	0	0	0	0	0	0	0	0	0	0	0	0	0	0	0	0	0	0	0	0	0	0	0	0	0	0	0	0	0	0	0	0	0	0	0	0	0	0	0	0
Oman	0	0	0	0	0	0	0	0	0	0	0	0	0	0	0	0	0	0	0	0	0	0	0	0	0	0	0	0	0	0	0	0	0	0	0	0	0	0	0	0	0
Pakistan	0	0	0	0	0	0	0	0	0	0	0	0	0	0	0	0	0	0	0	0	0	0	0	0	0	0	0	0	0	0	0	0	0	0	0	0	0	0	0	0	0
Palestine	0	0	0	0	0	0	0	0	0	0	0	0	0	0	0	0	0	0	0	0	0	0	0	0	0	0	0	0	0	0	0	0	0	0	0	0	0	0	0	0	0
Panama	0	0	0	0	0	0	0	0	0	0	0	0	0	0	0	0	0	0	0	0	0	0	0	0	0	0	0	0	0	0	0	0	0	0	0	0	0	0	0	0	0
Papua New Guinea	0	0	0	0	0	0	0	0	0	0	0	0	0	0	0	0	0	0	0	0	0	0	0	0	0	0	0	0	0	0	0	0	0	0	0	0	0	0	0	0	0
Paraguay	0	0	0	0	0	0	0	0	0	0	0	0	0	0	0	0	0	0	0	0	0	0	0	0	0	0	0	0	0	0	0	0	0	0	0	0	0	0	0	0	0
Peru	0	0	0	0	0	0	0	0	0	0	0	0	0	0	0	0	0	0	0	0	0	0	0	0	0	0	0	0	0	0	0	0	0	0	0	0	0	0	0	0	0
Philippines	0	0	0	0	0	0	0	0	0	0	0	0	0	0	0	0	0	0	0	0	0	0	0	0	0	0	0	0	0	0	0	0	0	0	0	0	0	0	0	0	0
Poland	0	0	0	0	0	0	0	0	0	0	0	0	0	0	0	0	0	0	0	0	0	0	0	0	0	0	0	0	0	0	0	0	0	0	0	0	0	0	0	0	0
Portugal	0	0	0	0	0	0	0	0	0	0	0	0	0	0	0	0	0	0	0	0	0	0	0	0	0	0	0	0	0	0	0	0	0	0	0	0	0	0	0	0	0
Qatar	0	0	0	0	0	0	0	0	0	0	0	0	0	0	0	0	0	0	0	0	0	0	0	0	0	0	0	0	0	0	0	0	0	0	0	0	0	0	0	0	0
Romania	0	0	0	0	0	0	0	0	0	0	0	0	0	0	0	0	0	0	0	0	0	0	0	0	0	0	0	0	0	0	0	0	0	0	0	0	0	0	0	0	0
Russia	0	0	0	0	0	0	0	0	0	0	0	0	0	0	0	0	0	0	0	0	0	0	0	0	0	0	0	0	0	0	0	0	0	0	0	0	0	0	0	0	0
Rwanda	0	0	0	0	0	0	0	0	0	0	0	0	0	0	0	0	0	0	0	0	0	0	0	0	0	0	0	0	0	0	0	0	0	0	0	0	0	0	0	0	0
Saint Lucia	0	0	0	0	0	0	0	0	0	0	0	0	0	0	0	0	0	0	0	0	0	0	0	0	0	0	0	0	0	0	0	0	0	0	0	0	0	0	0	0	0
Saint Vincent and the Grenadines	0	0	0	0	0	0	0	0	0	0	0	0	0	0	0	0	0	0	0	0	0	0	0	0	0	0	0	0	0	0	0	0	0	0	0	0	0	0	0	0	0
Samoa	0	0	0	0	0	0	0	0	0	0	0	0	0	0	0	0	0	0	0	0	0	0	0	0	0	0	0	0	0	0	0	0	0	0	0	0	0	0	0	0	0
São Tomé and Príncipe	0	0	0	0	0	0	0	0	0	0	0	0	0	0	0	0	0	0	0	0	0	0	0	0	0	0	0	0	0	0	0	0	0	0	0	0	0	0	0	0	0
Saudi Arabia	0	0	0	0	0	0	0	0	0	0	0	0	0	0	0	0	0	0	0	0	0	0	0	0	0	0	0	0	0	0	0	0	0	0	0	0	0	0	0	0	0
Senegal	486.517	501.743	518.273	535.645	553.266	570.828	584.929	598.957	613.389	628.804	645.569	663.284	682.424	702.819	724.188	746.297	767.287	789.401	812.562	836.697	861.854	888.893	916.987	946.219	976.831	1008.93	1040.61	1074.3	1109.74	1146.43	1184.18	1223.09	1262.71	1303.49	1346.07	1390.71	1435.37	1482.05	1530.45	1579.96	1630.23
Serbia	0	0	0	0	0	0	0	0	0	0	0	0	0	0	0	0	0	0	0	0	0	0	0	0	0	0	0	0	0	0	0	0	0	0	0	0	0	0	0	0	0
Seychelles	0	0	0	0	0	0	0	0	0	0	0	0	0	0	0	0	0	0	0	0	0	0	0	0	0	0	0	0	0	0	0	0	0	0	0	0	0	0	0	0	0
Sierra Leone	40939.5	41027.5	40856.8	40564.4	40310.3	40197.3	40190.6	40380.5	40832.2	41619	42759.6	44360.5	46456.6	48821.2	51185.1	53387	55131.8	56669.4	58085.9	59501.9	60998.2	62441.4	63927.1	65472	67091.3	68788.1	70392.5	72106.3	73905.8	75754.3	77628.6	79390.8	81197.6	83045.9	84938	86872.1	88704.6	90591	92523.2	94491.6	96488.8
Singapore	0	0	0	0	0	0	0	0	0	0	0	0	0	0	0	0	0	0	0	0	0	0	0	0	0	0	0	0	0	0	0	0	0	0	0	0	0	0	0	0	0
Slovakia	0	0	0	0	0	0	0	0	0	0	0	0	0	0	0	0	0	0	0	0	0	0	0	0	0	0	0	0	0	0	0	0	0	0	0	0	0	0	0	0	0
Slovenia	0	0	0	0	0	0	0	0	0	0	0	0	0	0	0	0	0	0	0	0	0	0	0	0	0	0	0	0	0	0	0	0	0	0	0	0	0	0	0	0	0
Solomon Islands	0	0	0	0	0	0	0	0	0	0	0	0	0	0	0	0	0	0	0	0	0	0	0	0	0	0	0	0	0	0	0	0	0	0	0	0	0	0	0	0	0
Somalia	0	0	0	0	0	0	0	0	0	0	0	0	0	0	0	0	0	0	0	0	0	0	0	0	0	0	0	0	0	0	0	0	0	0	0	0	0	0	0	0	0
South Africa	0	0	0	0	0	0	0	0	0	0	0	0	0	0	0	0	0	0	0	0	0	0	0	0	0	0	0	0	0	0	0	0	0	0	0	0	0	0	0	0	0
South Korea	0	0	0	0	0	0	0	0	0	0	0	0	0	0	0	0	0	0	0	0	0	0	0	0	0	0	0	0	0	0	0	0	0	0	0	0	0	0	0	0	0
Spain	0	0	0	0	0	0	0	0	0	0	0	0	0	0	0	0	0	0	0	0	0	0	0	0	0	0	0	0	0	0	0	0	0	0	0	0	0	0	0	0	0
Sri Lanka	0	0	0	0	0	0	0	0	0	0	0	0	0	0	0	0	0	0	0	0	0	0	0	0	0	0	0	0	0	0	0	0	0	0	0	0	0	0	0	0	0
Sudan	172959	178353	184248	190519	197017	203641	209663	215913	222401	229147	236186	243196	250552	258294	266504	275217	283888	293217	303067	313246	323647	333898	344337	355045	366158	377739	389214	401168	413544	426242	439199	451872	464853	478122	491670	505493	519041	532891	547035	561473	576203
Suriname	0	0	0	0	0	0	0	0	0	0	0	0	0	0	0	0	0	0	0	0	0	0	0	0	0	0	0	0	0	0	0	0	0	0	0	0	0	0	0	0	0
Swaziland	0	0	0	0	0	0	0	0	0	0	0	0	0	0	0	0	0	0	0	0	0	0	0	0	0	0	0	0	0	0	0	0	0	0	0	0	0	0	0	0	0
Sweden	0	0	0	0	0	0	0	0	0	0	0	0	0	0	0	0	0	0	0	0	0	0	0	0	0	0	0	0	0	0	0	0	0	0	0	0	0	0	0	0	0
Switzerland	0	0	0	0	0	0	0	0	0	0	0	0	0	0	0	0	0	0	0	0	0	0	0	0	0	0	0	0	0	0	0	0	0	0	0	0	0	0	0	0	0
Syria	0	0	0	0	0	0	0	0	0	0	0	0	0	0	0	0	0	0	0	0	0	0	0	0	0	0	0	0	0	0	0	0	0	0	0	0	0	0	0	0	0
Tajikistan	0	0	0	0	0	0	0	0	0	0	0	0	0	0	0	0	0	0	0	0	0	0	0	0	0	0	0	0	0	0	0	0	0	0	0	0	0	0	0	0	0
Tanzania	54503.8	56359.9	58401.6	60564.7	62767.7	64964.5	66886.6	68793.2	70720.5	72714.8	74804.2	76840.6	78975.1	81212.6	83555.5	86003	88481.3	91099.3	93846	96719.1	99721.8	102769	106019	109440	112994	116667	120443	124324	128349	132570	137011	141523	146257	151200	156318	161590	166914	172407	178063	183880	189856
Thailand	0	0	0	0	0	0	0	0	0	0	0	0	0	0	0	0	0	0	0	0	0	0	0	0	0	0	0	0	0	0	0	0	0	0	0	0	0	0	0	0	0
The Bahamas	0	0	0	0	0	0	0	0	0	0	0	0	0	0	0	0	0	0	0	0	0	0	0	0	0	0	0	0	0	0	0	0	0	0	0	0	0	0	0	0	0
The Gambia	0	0	0	0	0	0	0	0	0	0	0	0	0	0	0	0	0	0	0	0	0	0	0	0	0	0	0	0	0	0	0	0	0	0	0	0	0	0	0	0	0
Timor-Leste	0	0	0	0	0	0	0	0	0	0	0	0	0	0	0	0	0	0	0	0	0	0	0	0	0	0	0	0	0	0	0	0	0	0	0	0	0	0	0	0	0
Togo	9481.83	9689.14	9897.52	10113.7	10346.2	10601.8	10906.7	11238.4	11594.3	11970.5	12362.6	12764.1	13182.9	13617.1	14064.4	14523.1	14968.7	15430.9	15907.3	16395	16892.9	17390.8	17900.1	18422.9	18964	19526.7	20084.3	20673.3	21288.6	21921.9	22569.2	23231.6	23904.4	24593.4	25307.3	26049.1	26790.2	27560.3	28354.5	29163.9	29983.1
Tonga	0	0	0	0	0	0	0	0	0	0	0	0	0	0	0	0	0	0	0	0	0	0	0	0	0	0	0	0	0	0	0	0	0	0	0	0	0	0	0	0	0
Trinidad and Tobago	0	0	0	0	0	0	0	0	0	0	0	0	0	0	0	0	0	0	0	0	0	0	0	0	0	0	0	0	0	0	0	0	0	0	0	0	0	0	0	0	0
Tunisia	0	0	0	0	0	0	0	0	0	0	0	0	0	0	0	0	0	0	0	0	0	0	0	0	0	0	0	0	0	0	0	0	0	0	0	0	0	0	0	0	0
Turkey	0	0	0	0	0	0	0	0	0	0	0	0	0	0	0	0	0	0	0	0	0	0	0	0	0	0	0	0	0	0	0	0	0	0	0	0	0	0	0	0	0
Turkmenistan	0	0	0	0	0	0	0	0	0	0	0	0	0	0	0	0	0	0	0	0	0	0	0	0	0	0	0	0	0	0	0	0	0	0	0	0	0	0	0	0	0
Uganda	40746.1	41982.2	43267	44602.1	45994.4	47451.6	48781.4	50204.1	51725.2	53347.1	55073	56867.9	58777.2	60801.1	62947	65217.7	67515.4	69963.7	72550.6	75259.2	78084.8	80974.9	84003.9	87173.8	90493.2	93967	97480.9	101162	105010	109019	113190	117409	121804	126373	131111	136014	140972	146108	151418	156901	162556
Ukraine	0	0	0	0	0	0	0	0	0	0	0	0	0	0	0	0	0	0	0	0	0	0	0	0	0	0	0	0	0	0	0	0	0	0	0	0	0	0	0	0	0
United Arab Emirates	0	0	0	0	0	0	0	0	0	0	0	0	0	0	0	0	0	0	0	0	0	0	0	0	0	0	0	0	0	0	0	0	0	0	0	0	0	0	0	0	0
United Kingdom	0	0	0	0	0	0	0	0	0	0	0	0	0	0	0	0	0	0	0	0	0	0	0	0	0	0	0	0	0	0	0	0	0	0	0	0	0	0	0	0	0
United States	0	0	0	0	0	0	0	0	0	0	0	0	0	0	0	0	0	0	0	0	0	0	0	0	0	0	0	0	0	0	0	0	0	0	0	0	0	0	0	0	0
Uruguay	0	0	0	0	0	0	0	0	0	0	0	0	0	0	0	0	0	0	0	0	0	0	0	0	0	0	0	0	0	0	0	0	0	0	0	0	0	0	0	0	0
Uzbekistan	0	0	0	0	0	0	0	0	0	0	0	0	0	0	0	0	0	0	0	0	0	0	0	0	0	0	0	0	0	0	0	0	0	0	0	0	0	0	0	0	0
Vanuatu	0	0	0	0	0	0	0	0	0	0	0	0	0	0	0	0	0	0	0	0	0	0	0	0	0	0	0	0	0	0	0	0	0	0	0	0	0	0	0	0	0
Venezuela	0	0	0	0	0	0	0	0	0	0	0	0	0	0	0	0	0	0	0	0	0	0	0	0	0	0	0	0	0	0	0	0	0	0	0	0	0	0	0	0	0
Vietnam	0	0	0	0	0	0	0	0	0	0	0	0	0	0	0	0	0	0	0	0	0	0	0	0	0	0	0	0	0	0	0	0	0	0	0	0	0	0	0	0	0
Yemen	0	0	0	0	0	0	0	0	0	0	0	0	0	0	0	0	0	0	0	0	0	0	0	0	0	0	0	0	0	0	0	0	0	0	0	0	0	0	0	0	0
Zambia	0	0	0	0	0	0	0	0	0	0	0	0	0	0	0	0	0	0	0	0	0	0	0	0	0	0	0	0	0	0	0	0	0	0	0	0	0	0	0	0	0
Zimbabwe	0	0	0	0	0	0	0	0	0	0	0	0	0	0	0	0	0	0	0	0	0	0	0	0	0	0	0	0	0	0	0	0	0	0	0	0	0	0	0	0	0
WOMEN
Afghanistan	0	0	0	0	0	0	0	0	0	0	0	0	0	0	0	0	0	0	0	0	0	0	0	0	0	0	0	0	0	0	0	0	0	0	0	0	0	0	0	0	0
Albania	0	0	0	0	0	0	0	0	0	0	0	0	0	0	0	0	0	0	0	0	0	0	0	0	0	0	0	0	0	0	0	0	0	0	0	0	0	0	0	0	0
Algeria	0	0	0	0	0	0	0	0	0	0	0	0	0	0	0	0	0	0	0	0	0	0	0	0	0	0	0	0	0	0	0	0	0	0	0	0	0	0	0	0	0
Angola	8428.27	8655.91	8923.31	9217.2	9521.04	9825.78	10081.1	10341.8	10618.6	10924	11264.3	11607.9	11994.8	12415.8	12859.9	13320.4	13749.6	14202.4	14678.1	15178.2	15704.8	16208.5	16751.6	17330.6	17939.6	18576.2	19221	19888.9	20585.5	21319.6	22093.7	22842.7	23638.7	24474	25335.9	26217.8	27081.6	27973	28891.5	29840.3	30821.1
Antigua and Barbuda	0	0	0	0	0	0	0	0	0	0	0	0	0	0	0	0	0	0	0	0	0	0	0	0	0	0	0	0	0	0	0	0	0	0	0	0	0	0	0	0	0
Argentina	0	0	0	0	0	0	0	0	0	0	0	0	0	0	0	0	0	0	0	0	0	0	0	0	0	0	0	0	0	0	0	0	0	0	0	0	0	0	0	0	0
Armenia	0	0	0	0	0	0	0	0	0	0	0	0	0	0	0	0	0	0	0	0	0	0	0	0	0	0	0	0	0	0	0	0	0	0	0	0	0	0	0	0	0
Australia	0	0	0	0	0	0	0	0	0	0	0	0	0	0	0	0	0	0	0	0	0	0	0	0	0	0	0	0	0	0	0	0	0	0	0	0	0	0	0	0	0
Austria	0	0	0	0	0	0	0	0	0	0	0	0	0	0	0	0	0	0	0	0	0	0	0	0	0	0	0	0	0	0	0	0	0	0	0	0	0	0	0	0	0
Azerbaijan	0	0	0	0	0	0	0	0	0	0	0	0	0	0	0	0	0	0	0	0	0	0	0	0	0	0	0	0	0	0	0	0	0	0	0	0	0	0	0	0	0
Bahrain	0	0	0	0	0	0	0	0	0	0	0	0	0	0	0	0	0	0	0	0	0	0	0	0	0	0	0	0	0	0	0	0	0	0	0	0	0	0	0	0	0
Bangladesh	0	0	0	0	0	0	0	0	0	0	0	0	0	0	0	0	0	0	0	0	0	0	0	0	0	0	0	0	0	0	0	0	0	0	0	0	0	0	0	0	0
Barbados	0	0	0	0	0	0	0	0	0	0	0	0	0	0	0	0	0	0	0	0	0	0	0	0	0	0	0	0	0	0	0	0	0	0	0	0	0	0	0	0	0
Belarus	0	0	0	0	0	0	0	0	0	0	0	0	0	0	0	0	0	0	0	0	0	0	0	0	0	0	0	0	0	0	0	0	0	0	0	0	0	0	0	0	0
Belgium	0	0	0	0	0	0	0	0	0	0	0	0	0	0	0	0	0	0	0	0	0	0	0	0	0	0	0	0	0	0	0	0	0	0	0	0	0	0	0	0	0
Belize	0	0	0	0	0	0	0	0	0	0	0	0	0	0	0	0	0	0	0	0	0	0	0	0	0	0	0	0	0	0	0	0	0	0	0	0	0	0	0	0	0
Benin	39815.4	41142.2	42585.7	44107.9	45665.3	47230.9	48601.8	49991.6	51424.2	52932.9	54543.3	56299.3	58170.7	60144.3	62206.1	64343.5	66448.4	68650	70934.4	73285.6	75697	78080.8	80530.1	83052	85659.4	88359.8	91088.8	93916.2	96836.6	99841.7	102925	106011	109185	112441	115767	119161	122548	126013	129549	133153	136821
Bhutan	0	0	0	0	0	0	0	0	0	0	0	0	0	0	0	0	0	0	0	0	0	0	0	0	0	0	0	0	0	0	0	0	0	0	0	0	0	0	0	0	0
Bolivia	0	0	0	0	0	0	0	0	0	0	0	0	0	0	0	0	0	0	0	0	0	0	0	0	0	0	0	0	0	0	0	0	0	0	0	0	0	0	0	0	0
Bosnia and Herzegovina	0	0	0	0	0	0	0	0	0	0	0	0	0	0	0	0	0	0	0	0	0	0	0	0	0	0	0	0	0	0	0	0	0	0	0	0	0	0	0	0	0
Botswana	0	0	0	0	0	0	0	0	0	0	0	0	0	0	0	0	0	0	0	0	0	0	0	0	0	0	0	0	0	0	0	0	0	0	0	0	0	0	0	0	0
Brazil	0	0	0	0	0	0	0	0	0	0	0	0	0	0	0	0	0	0	0	0	0	0	0	0	0	0	0	0	0	0	0	0	0	0	0	0	0	0	0	0	0
Brunei	0	0	0	0	0	0	0	0	0	0	0	0	0	0	0	0	0	0	0	0	0	0	0	0	0	0	0	0	0	0	0	0	0	0	0	0	0	0	0	0	0
Bulgaria	0	0	0	0	0	0	0	0	0	0	0	0	0	0	0	0	0	0	0	0	0	0	0	0	0	0	0	0	0	0	0	0	0	0	0	0	0	0	0	0	0
Burkina Faso	47583.5	48725.9	49953.1	51267.1	52669.6	54159.7	55554.2	57062.9	58671	60360.4	62122.4	63789.6	65561.7	67432.5	69400	71465.6	73467.2	75596	77846.9	80217.8	82708.8	85130.1	87709.1	90434.2	93292.2	96277.4	99230.9	102329	105572	108962	112501	115993	119655	123474	127430	131513	135537	139710	144027	148482	153073
Burundi	21817.3	22130.6	22476.8	22842.8	23206.8	23560.3	23751.9	23930.4	24145.3	24460.7	24919.1	25815.3	26874.2	28066.2	29341.2	30655.5	31974.1	33338.7	34725.4	36113.3	37489.7	38648.7	39812.1	40984.9	42180.9	43418	44657.6	45958.4	47328	48781.2	50328.3	51895.1	53570.6	55352.6	57232.8	59205.6	61211.4	63310.1	65499.3	67772.6	70121.6
Cambodia	0	0	0	0	0	0	0	0	0	0	0	0	0	0	0	0	0	0	0	0	0	0	0	0	0	0	0	0	0	0	0	0	0	0	0	0	0	0	0	0	0
Cameroon	151792	155916	160267	164846	169675	174767	179690	184901	190388	196121	202075	207782	213707	219865	226288	232988	239441	246289	253467	260895	268540	276088	283937	292084	300554	309364	318138	327286	336805	346687	356925	367083	377664	388633	399946	411578	423237	435249	447601	460296	473325
Canada	0	0	0	0	0	0	0	0	0	0	0	0	0	0	0	0	0	0	0	0	0	0	0	0	0	0	0	0	0	0	0	0	0	0	0	0	0	0	0	0	0
Cape Verde	0	0	0	0	0	0	0	0	0	0	0	0	0	0	0	0	0	0	0	0	0	0	0	0	0	0	0	0	0	0	0	0	0	0	0	0	0	0	0	0	0
Central African Republic	50839.7	51961.3	53237.9	54631.7	56086	57560.5	58879.5	60195.9	61516.8	62860.7	64234.6	65301.7	66430.5	67621.4	68874.4	70203	71648.3	73217.3	74897.7	76676.1	78538.3	80448.9	82418.9	84455.6	86576.1	88783.7	90859.3	93070.3	95375.7	97721.3	100085	102425	104802	107227	109728	112321	114908	117592	120364	123208	126113
Chad	27663.7	28364.2	29111.7	29911.2	30770.2	31693.7	32563.8	33519.7	34564.4	35702.3	36934.8	38168	39519.6	40957.7	42449.4	43978.6	45384.7	46826.4	48322.1	49894.8	51559.9	53180.4	54913.4	56749.8	58679.7	60698.5	62681.8	64779.1	66990.7	69319.7	71767.3	74200.2	76780.7	79493.2	82321.3	85255.3	88164.1	91198.9	94353.9	97626.6	101016
Chile	0	0	0	0	0	0	0	0	0	0	0	0	0	0	0	0	0	0	0	0	0	0	0	0	0	0	0	0	0	0	0	0	0	0	0	0	0	0	0	0	0
China	0	0	0	0	0	0	0	0	0	0	0	0	0	0	0	0	0	0	0	0	0	0	0	0	0	0	0	0	0	0	0	0	0	0	0	0	0	0	0	0	0
Colombia	0	0	0	0	0	0	0	0	0	0	0	0	0	0	0	0	0	0	0	0	0	0	0	0	0	0	0	0	0	0	0	0	0	0	0	0	0	0	0	0	0
Comoros	0	0	0	0	0	0	0	0	0	0	0	0	0	0	0	0	0	0	0	0	0	0	0	0	0	0	0	0	0	0	0	0	0	0	0	0	0	0	0	0	0
Congo	5562.13	5724.6	5894.59	6072.45	6258.07	6451.16	6647.14	6850.44	7058.08	7267.03	7475.2	7651.54	7829.53	8013.63	8209.44	8421.37	8666.3	8930.09	9206.9	9490.04	9774.35	10023	10272.8	10526.6	10788.7	11063.2	11338.2	11631.6	11943	12270.6	12614.3	12990.5	13380	13785	14208.4	14650.2	15090.6	15550.8	16026.9	16513.4	17007.3
Costa Rica	0	0	0	0	0	0	0	0	0	0	0	0	0	0	0	0	0	0	0	0	0	0	0	0	0	0	0	0	0	0	0	0	0	0	0	0	0	0	0	0	0
Côte d’Ivoire	87909.3	91388.4	95056.4	98875.9	102784	106727	110256	113757	117187	120508	123686	126029	128239	130380	132523	134744	137460	140297	143319	146574	150060	154150	158423	162868	167479	172220	176624	181366	186314	191280	196190	201371	206422	211490	216805	222469	228277	234423	240852	247431	254080
Croatia	0	0	0	0	0	0	0	0	0	0	0	0	0	0	0	0	0	0	0	0	0	0	0	0	0	0	0	0	0	0	0	0	0	0	0	0	0	0	0	0	0
Cuba	0	0	0	0	0	0	0	0	0	0	0	0	0	0	0	0	0	0	0	0	0	0	0	0	0	0	0	0	0	0	0	0	0	0	0	0	0	0	0	0	0
Cyprus	0	0	0	0	0	0	0	0	0	0	0	0	0	0	0	0	0	0	0	0	0	0	0	0	0	0	0	0	0	0	0	0	0	0	0	0	0	0	0	0	0
Czech Republic	0	0	0	0	0	0	0	0	0	0	0	0	0	0	0	0	0	0	0	0	0	0	0	0	0	0	0	0	0	0	0	0	0	0	0	0	0	0	0	0	0
Democratic Republic of the Congo	581248	600496	621877	644107	665853	686457	701244	714915	728643	743735	761023	779371	800486	823892	849100	875753	900837	928004	956981	987439	1.0192e+06	1.04922e+06	1.08103e+06	1.11448e+06	1.14952e+06	1.18613e+06	1.2213e+06	1.25838e+06	1.29726e+06	1.33789e+06	1.38022e+06	1.42084e+06	1.46368e+06	1.5085e+06	1.55503e+06	1.60313e+06	1.64965e+06	1.69817e+06	1.74854e+06	1.80071e+06	1.85462e+06
Denmark	0	0	0	0	0	0	0	0	0	0	0	0	0	0	0	0	0	0	0	0	0	0	0	0	0	0	0	0	0	0	0	0	0	0	0	0	0	0	0	0	0
Djibouti	0	0	0	0	0	0	0	0	0	0	0	0	0	0	0	0	0	0	0	0	0	0	0	0	0	0	0	0	0	0	0	0	0	0	0	0	0	0	0	0	0
Dominican Republic	0	0	0	0	0	0	0	0	0	0	0	0	0	0	0	0	0	0	0	0	0	0	0	0	0	0	0	0	0	0	0	0	0	0	0	0	0	0	0	0	0
Ecuador	0	0	0	0	0	0	0	0	0	0	0	0	0	0	0	0	0	0	0	0	0	0	0	0	0	0	0	0	0	0	0	0	0	0	0	0	0	0	0	0	0
Egypt	0	0	0	0	0	0	0	0	0	0	0	0	0	0	0	0	0	0	0	0	0	0	0	0	0	0	0	0	0	0	0	0	0	0	0	0	0	0	0	0	0
El Salvador	0	0	0	0	0	0	0	0	0	0	0	0	0	0	0	0	0	0	0	0	0	0	0	0	0	0	0	0	0	0	0	0	0	0	0	0	0	0	0	0	0
Equatorial Guinea	2879.55	2930.72	2988.21	3050.93	3118.56	3191.75	3272.21	3358	3452.18	3558.62	3678.79	3799.86	3936.26	4084.97	4240.72	4400.06	4548.43	4700.88	4857.64	5020.5	5190.37	5350.86	5522	5701.05	5884.59	6071.22	6251.56	6436.43	6626.53	6823.83	7029.39	7230.32	7440.46	7659.03	7884.85	8117.29	8344.47	8579.57	8821.83	9070.57	9325.25
Eritrea	0	0	0	0	0	0	0	0	0	0	0	0	0	0	0	0	0	0	0	0	0	0	0	0	0	0	0	0	0	0	0	0	0	0	0	0	0	0	0	0	0
Estonia	0	0	0	0	0	0	0	0	0	0	0	0	0	0	0	0	0	0	0	0	0	0	0	0	0	0	0	0	0	0	0	0	0	0	0	0	0	0	0	0	0
Ethiopia	58621.2	60486.7	62536.4	64725.3	66987.9	69279.4	71264.3	73282.7	75355.6	77531.9	79847.4	82104.5	84556.7	87163.1	89881.3	92705.8	95704.1	98844.4	102156	105668	109386	113308	117400	121659	126079	130646	135195	139912	144754	149669	154627	159541	164518	169553	174660	179848	185060	190345	195707	201152	206681
Federated States of Micronesia	0	0	0	0	0	0	0	0	0	0	0	0	0	0	0	0	0	0	0	0	0	0	0	0	0	0	0	0	0	0	0	0	0	0	0	0	0	0	0	0	0
Fiji	0	0	0	0	0	0	0	0	0	0	0	0	0	0	0	0	0	0	0	0	0	0	0	0	0	0	0	0	0	0	0	0	0	0	0	0	0	0	0	0	0
Finland	0	0	0	0	0	0	0	0	0	0	0	0	0	0	0	0	0	0	0	0	0	0	0	0	0	0	0	0	0	0	0	0	0	0	0	0	0	0	0	0	0
France	0	0	0	0	0	0	0	0	0	0	0	0	0	0	0	0	0	0	0	0	0	0	0	0	0	0	0	0	0	0	0	0	0	0	0	0	0	0	0	0	0
Gabon	0	0	0	0	0	0	0	0	0	0	0	0	0	0	0	0	0	0	0	0	0	0	0	0	0	0	0	0	0	0	0	0	0	0	0	0	0	0	0	0	0
Georgia	0	0	0	0	0	0	0	0	0	0	0	0	0	0	0	0	0	0	0	0	0	0	0	0	0	0	0	0	0	0	0	0	0	0	0	0	0	0	0	0	0
Germany	0	0	0	0	0	0	0	0	0	0	0	0	0	0	0	0	0	0	0	0	0	0	0	0	0	0	0	0	0	0	0	0	0	0	0	0	0	0	0	0	0
Ghana	64957.6	67147	69471.3	71880.4	74316.5	76745.8	78956.3	81179.3	83464.1	85870.1	88439.6	91402.6	94536.6	97842.7	101326	104974	108602	112431	116376	120311	124150	127315	130342	133281	136225	139249	142525	145890	149345	152881	156490	160266	164113	168035	172028	176084	180205	184385	188607	192849	197099
Greece	0	0	0	0	0	0	0	0	0	0	0	0	0	0	0	0	0	0	0	0	0	0	0	0	0	0	0	0	0	0	0	0	0	0	0	0	0	0	0	0	0
Grenada	0	0	0	0	0	0	0	0	0	0	0	0	0	0	0	0	0	0	0	0	0	0	0	0	0	0	0	0	0	0	0	0	0	0	0	0	0	0	0	0	0
Guatemala	0	0	0	0	0	0	0	0	0	0	0	0	0	0	0	0	0	0	0	0	0	0	0	0	0	0	0	0	0	0	0	0	0	0	0	0	0	0	0	0	0
Guinea	31748	33352	35247.5	37264.7	39207.2	40962.8	42179.4	43141.4	43941.8	44699.2	45495.6	46213.5	46973.9	47804.8	48735.2	49780.5	50984.4	52367.5	53885.5	55483.6	57125.8	58743.6	60428.6	62175.6	63984	65854.2	67715.1	69646.5	71644.2	73705.5	75829.3	77944.1	80133.3	82390.7	84710	87087	89452.8	91885.3	94380.2	96934.6	99545.3
Guinea-Bissau	3152.29	3240.1	3318.76	3392.03	3469.69	3556.3	3634.25	3722.36	3818.24	3916.99	4016.48	4114.62	4214.73	4316.79	4421.81	4530.13	4633.12	4741.27	4855.72	4977.81	5108.5	5242.75	5388.49	5542.79	5702.11	5864.25	6021.12	6182.11	6347.85	6519.56	6698.04	6874.07	7057.71	7247.96	7443.38	7643.16	7838.41	8039.25	8245.67	8457.99	8676.14
Guyana	0	0	0	0	0	0	0	0	0	0	0	0	0	0	0	0	0	0	0	0	0	0	0	0	0	0	0	0	0	0	0	0	0	0	0	0	0	0	0	0	0
Haiti	0	0	0	0	0	0	0	0	0	0	0	0	0	0	0	0	0	0	0	0	0	0	0	0	0	0	0	0	0	0	0	0	0	0	0	0	0	0	0	0	0
Honduras	0	0	0	0	0	0	0	0	0	0	0	0	0	0	0	0	0	0	0	0	0	0	0	0	0	0	0	0	0	0	0	0	0	0	0	0	0	0	0	0	0
Hungary	0	0	0	0	0	0	0	0	0	0	0	0	0	0	0	0	0	0	0	0	0	0	0	0	0	0	0	0	0	0	0	0	0	0	0	0	0	0	0	0	0
Iceland	0	0	0	0	0	0	0	0	0	0	0	0	0	0	0	0	0	0	0	0	0	0	0	0	0	0	0	0	0	0	0	0	0	0	0	0	0	0	0	0	0
India	0	0	0	0	0	0	0	0	0	0	0	0	0	0	0	0	0	0	0	0	0	0	0	0	0	0	0	0	0	0	0	0	0	0	0	0	0	0	0	0	0
Indonesia	0	0	0	0	0	0	0	0	0	0	0	0	0	0	0	0	0	0	0	0	0	0	0	0	0	0	0	0	0	0	0	0	0	0	0	0	0	0	0	0	0
Iran	0	0	0	0	0	0	0	0	0	0	0	0	0	0	0	0	0	0	0	0	0	0	0	0	0	0	0	0	0	0	0	0	0	0	0	0	0	0	0	0	0
Iraq	0	0	0	0	0	0	0	0	0	0	0	0	0	0	0	0	0	0	0	0	0	0	0	0	0	0	0	0	0	0	0	0	0	0	0	0	0	0	0	0	0
Ireland	0	0	0	0	0	0	0	0	0	0	0	0	0	0	0	0	0	0	0	0	0	0	0	0	0	0	0	0	0	0	0	0	0	0	0	0	0	0	0	0	0
Israel	0	0	0	0	0	0	0	0	0	0	0	0	0	0	0	0	0	0	0	0	0	0	0	0	0	0	0	0	0	0	0	0	0	0	0	0	0	0	0	0	0
Italy	0	0	0	0	0	0	0	0	0	0	0	0	0	0	0	0	0	0	0	0	0	0	0	0	0	0	0	0	0	0	0	0	0	0	0	0	0	0	0	0	0
Jamaica	0	0	0	0	0	0	0	0	0	0	0	0	0	0	0	0	0	0	0	0	0	0	0	0	0	0	0	0	0	0	0	0	0	0	0	0	0	0	0	0	0
Japan	0	0	0	0	0	0	0	0	0	0	0	0	0	0	0	0	0	0	0	0	0	0	0	0	0	0	0	0	0	0	0	0	0	0	0	0	0	0	0	0	0
Jordan	0	0	0	0	0	0	0	0	0	0	0	0	0	0	0	0	0	0	0	0	0	0	0	0	0	0	0	0	0	0	0	0	0	0	0	0	0	0	0	0	0
Kazakhstan	0	0	0	0	0	0	0	0	0	0	0	0	0	0	0	0	0	0	0	0	0	0	0	0	0	0	0	0	0	0	0	0	0	0	0	0	0	0	0	0	0
Kenya	0	0	0	0	0	0	0	0	0	0	0	0	0	0	0	0	0	0	0	0	0	0	0	0	0	0	0	0	0	0	0	0	0	0	0	0	0	0	0	0	0
Kiribati	0	0	0	0	0	0	0	0	0	0	0	0	0	0	0	0	0	0	0	0	0	0	0	0	0	0	0	0	0	0	0	0	0	0	0	0	0	0	0	0	0
Kuwait	0	0	0	0	0	0	0	0	0	0	0	0	0	0	0	0	0	0	0	0	0	0	0	0	0	0	0	0	0	0	0	0	0	0	0	0	0	0	0	0	0
Kyrgyzstan	0	0	0	0	0	0	0	0	0	0	0	0	0	0	0	0	0	0	0	0	0	0	0	0	0	0	0	0	0	0	0	0	0	0	0	0	0	0	0	0	0
Laos	0	0	0	0	0	0	0	0	0	0	0	0	0	0	0	0	0	0	0	0	0	0	0	0	0	0	0	0	0	0	0	0	0	0	0	0	0	0	0	0	0
Latvia	0	0	0	0	0	0	0	0	0	0	0	0	0	0	0	0	0	0	0	0	0	0	0	0	0	0	0	0	0	0	0	0	0	0	0	0	0	0	0	0	0
Lebanon	0	0	0	0	0	0	0	0	0	0	0	0	0	0	0	0	0	0	0	0	0	0	0	0	0	0	0	0	0	0	0	0	0	0	0	0	0	0	0	0	0
Lesotho	0	0	0	0	0	0	0	0	0	0	0	0	0	0	0	0	0	0	0	0	0	0	0	0	0	0	0	0	0	0	0	0	0	0	0	0	0	0	0	0	0
Liberia	35463.9	34954.3	34507.6	34342	34715.8	35745.8	37851.7	40796.8	44147.6	47378.9	50171.1	51914.6	53108.7	54045.7	55101.6	56514	58434.4	60751.9	63295.2	65855.5	68308.4	70513.7	72583.7	74606.8	76692.3	78908.6	81231.7	83672.8	86219.9	88847.8	91538	94250.3	97042.6	99904.2	102823	105792	108779	111824	114924	118080	121290
Libya	0	0	0	0	0	0	0	0	0	0	0	0	0	0	0	0	0	0	0	0	0	0	0	0	0	0	0	0	0	0	0	0	0	0	0	0	0	0	0	0	0
Lithuania	0	0	0	0	0	0	0	0	0	0	0	0	0	0	0	0	0	0	0	0	0	0	0	0	0	0	0	0	0	0	0	0	0	0	0	0	0	0	0	0	0
Luxembourg	0	0	0	0	0	0	0	0	0	0	0	0	0	0	0	0	0	0	0	0	0	0	0	0	0	0	0	0	0	0	0	0	0	0	0	0	0	0	0	0	0
Macedonia	0	0	0	0	0	0	0	0	0	0	0	0	0	0	0	0	0	0	0	0	0	0	0	0	0	0	0	0	0	0	0	0	0	0	0	0	0	0	0	0	0
Madagascar	0	0	0	0	0	0	0	0	0	0	0	0	0	0	0	0	0	0	0	0	0	0	0	0	0	0	0	0	0	0	0	0	0	0	0	0	0	0	0	0	0
Malawi	16009.5	16356.2	16551	16668.4	16805.1	17022.9	17236.9	17569.1	17980.6	18422.6	18866.3	19295.3	19736.9	20204.4	20712.7	21267.8	21873.7	22510.2	23179.9	23890.7	24645.8	25362.6	26166.1	27028.5	27908.6	28788.3	29719.6	30622.1	31530.3	32498.9	33552.7	34587.5	35719.3	36922.5	38151.9	39385.4	40616.4	41860.6	43124.8	44428.5	45782.4
Malaysia	0	0	0	0	0	0	0	0	0	0	0	0	0	0	0	0	0	0	0	0	0	0	0	0	0	0	0	0	0	0	0	0	0	0	0	0	0	0	0	0	0
Maldives	0	0	0	0	0	0	0	0	0	0	0	0	0	0	0	0	0	0	0	0	0	0	0	0	0	0	0	0	0	0	0	0	0	0	0	0	0	0	0	0	0
Mali	11479.6	11684.7	11934.7	12219.8	12527.2	12847.9	13133.5	13438.2	13762.9	14110.6	14483.3	14847.5	15246.2	15673.5	16124	16594.5	17040.5	17515.8	18015.8	18536.3	19075.5	19558.4	20065.3	20601.6	21175.4	21792.7	22421.1	23107	23844.1	24623.9	25442.1	26256.7	27116.4	28022.4	28977.8	29984.7	30987.6	32051.4	33171.6	34342.1	35559.9
Malta	0	0	0	0	0	0	0	0	0	0	0	0	0	0	0	0	0	0	0	0	0	0	0	0	0	0	0	0	0	0	0	0	0	0	0	0	0	0	0	0	0
Mauritania	0	0	0	0	0	0	0	0	0	0	0	0	0	0	0	0	0	0	0	0	0	0	0	0	0	0	0	0	0	0	0	0	0	0	0	0	0	0	0	0	0
Mauritius	0	0	0	0	0	0	0	0	0	0	0	0	0	0	0	0	0	0	0	0	0	0	0	0	0	0	0	0	0	0	0	0	0	0	0	0	0	0	0	0	0
Mexico	0	0	0	0	0	0	0	0	0	0	0	0	0	0	0	0	0	0	0	0	0	0	0	0	0	0	0	0	0	0	0	0	0	0	0	0	0	0	0	0	0
Moldova	0	0	0	0	0	0	0	0	0	0	0	0	0	0	0	0	0	0	0	0	0	0	0	0	0	0	0	0	0	0	0	0	0	0	0	0	0	0	0	0	0
Mongolia	0	0	0	0	0	0	0	0	0	0	0	0	0	0	0	0	0	0	0	0	0	0	0	0	0	0	0	0	0	0	0	0	0	0	0	0	0	0	0	0	0
Montenegro	0	0	0	0	0	0	0	0	0	0	0	0	0	0	0	0	0	0	0	0	0	0	0	0	0	0	0	0	0	0	0	0	0	0	0	0	0	0	0	0	0
Morocco	0	0	0	0	0	0	0	0	0	0	0	0	0	0	0	0	0	0	0	0	0	0	0	0	0	0	0	0	0	0	0	0	0	0	0	0	0	0	0	0	0
Mozambique	0	0	0	0	0	0	0	0	0	0	0	0	0	0	0	0	0	0	0	0	0	0	0	0	0	0	0	0	0	0	0	0	0	0	0	0	0	0	0	0	0
Myanmar	0	0	0	0	0	0	0	0	0	0	0	0	0	0	0	0	0	0	0	0	0	0	0	0	0	0	0	0	0	0	0	0	0	0	0	0	0	0	0	0	0
Namibia	0	0	0	0	0	0	0	0	0	0	0	0	0	0	0	0	0	0	0	0	0	0	0	0	0	0	0	0	0	0	0	0	0	0	0	0	0	0	0	0	0
Nepal	0	0	0	0	0	0	0	0	0	0	0	0	0	0	0	0	0	0	0	0	0	0	0	0	0	0	0	0	0	0	0	0	0	0	0	0	0	0	0	0	0
Netherlands	0	0	0	0	0	0	0	0	0	0	0	0	0	0	0	0	0	0	0	0	0	0	0	0	0	0	0	0	0	0	0	0	0	0	0	0	0	0	0	0	0
New Zealand	0	0	0	0	0	0	0	0	0	0	0	0	0	0	0	0	0	0	0	0	0	0	0	0	0	0	0	0	0	0	0	0	0	0	0	0	0	0	0	0	0
Nicaragua	0	0	0	0	0	0	0	0	0	0	0	0	0	0	0	0	0	0	0	0	0	0	0	0	0	0	0	0	0	0	0	0	0	0	0	0	0	0	0	0	0
Niger	1686.43	1735.74	1789.66	1847.84	1910.23	1976.71	2034.09	2097.24	2165.17	2237.01	2312.47	2379.06	2452.14	2530.65	2613.78	2701.4	2785.54	2875.78	2972.19	3075.21	3185.17	3294.47	3411.71	3536.81	3669.72	3810.42	3949.37	4098.54	4257.04	4423.91	4598.84	4774.76	4960.33	5155.84	5362.09	5579.7	5799.71	6033.05	6279.29	6537.92	6808.91
Nigeria	427952	439181	451027	463459	476432	489895	502697	516112	530041	544362	558986	572700	586964	601710	616894	632497	647996	664242	681161	698677	716751	735255	754453	774403	795240	817026	839046	862469	887105	912656	938982	966382	994556	1.02369e+06	1.05407e+06	1.08579e+06	1.11828e+06	1.15224e+06	1.18751e+06	1.22382e+06	1.261e+06
North Korea	0	0	0	0	0	0	0	0	0	0	0	0	0	0	0	0	0	0	0	0	0	0	0	0	0	0	0	0	0	0	0	0	0	0	0	0	0	0	0	0	0
Norway	0	0	0	0	0	0	0	0	0	0	0	0	0	0	0	0	0	0	0	0	0	0	0	0	0	0	0	0	0	0	0	0	0	0	0	0	0	0	0	0	0
Oman	0	0	0	0	0	0	0	0	0	0	0	0	0	0	0	0	0	0	0	0	0	0	0	0	0	0	0	0	0	0	0	0	0	0	0	0	0	0	0	0	0
Pakistan	0	0	0	0	0	0	0	0	0	0	0	0	0	0	0	0	0	0	0	0	0	0	0	0	0	0	0	0	0	0	0	0	0	0	0	0	0	0	0	0	0
Palestine	0	0	0	0	0	0	0	0	0	0	0	0	0	0	0	0	0	0	0	0	0	0	0	0	0	0	0	0	0	0	0	0	0	0	0	0	0	0	0	0	0
Panama	0	0	0	0	0	0	0	0	0	0	0	0	0	0	0	0	0	0	0	0	0	0	0	0	0	0	0	0	0	0	0	0	0	0	0	0	0	0	0	0	0
Papua New Guinea	0	0	0	0	0	0	0	0	0	0	0	0	0	0	0	0	0	0	0	0	0	0	0	0	0	0	0	0	0	0	0	0	0	0	0	0	0	0	0	0	0
Paraguay	0	0	0	0	0	0	0	0	0	0	0	0	0	0	0	0	0	0	0	0	0	0	0	0	0	0	0	0	0	0	0	0	0	0	0	0	0	0	0	0	0
Peru	0	0	0	0	0	0	0	0	0	0	0	0	0	0	0	0	0	0	0	0	0	0	0	0	0	0	0	0	0	0	0	0	0	0	0	0	0	0	0	0	0
Philippines	0	0	0	0	0	0	0	0	0	0	0	0	0	0	0	0	0	0	0	0	0	0	0	0	0	0	0	0	0	0	0	0	0	0	0	0	0	0	0	0	0
Poland	0	0	0	0	0	0	0	0	0	0	0	0	0	0	0	0	0	0	0	0	0	0	0	0	0	0	0	0	0	0	0	0	0	0	0	0	0	0	0	0	0
Portugal	0	0	0	0	0	0	0	0	0	0	0	0	0	0	0	0	0	0	0	0	0	0	0	0	0	0	0	0	0	0	0	0	0	0	0	0	0	0	0	0	0
Qatar	0	0	0	0	0	0	0	0	0	0	0	0	0	0	0	0	0	0	0	0	0	0	0	0	0	0	0	0	0	0	0	0	0	0	0	0	0	0	0	0	0
Romania	0	0	0	0	0	0	0	0	0	0	0	0	0	0	0	0	0	0	0	0	0	0	0	0	0	0	0	0	0	0	0	0	0	0	0	0	0	0	0	0	0
Russia	0	0	0	0	0	0	0	0	0	0	0	0	0	0	0	0	0	0	0	0	0	0	0	0	0	0	0	0	0	0	0	0	0	0	0	0	0	0	0	0	0
Rwanda	0	0	0	0	0	0	0	0	0	0	0	0	0	0	0	0	0	0	0	0	0	0	0	0	0	0	0	0	0	0	0	0	0	0	0	0	0	0	0	0	0
Saint Lucia	0	0	0	0	0	0	0	0	0	0	0	0	0	0	0	0	0	0	0	0	0	0	0	0	0	0	0	0	0	0	0	0	0	0	0	0	0	0	0	0	0
Saint Vincent and the Grenadines	0	0	0	0	0	0	0	0	0	0	0	0	0	0	0	0	0	0	0	0	0	0	0	0	0	0	0	0	0	0	0	0	0	0	0	0	0	0	0	0	0
Samoa	0	0	0	0	0	0	0	0	0	0	0	0	0	0	0	0	0	0	0	0	0	0	0	0	0	0	0	0	0	0	0	0	0	0	0	0	0	0	0	0	0
São Tomé and Príncipe	0	0	0	0	0	0	0	0	0	0	0	0	0	0	0	0	0	0	0	0	0	0	0	0	0	0	0	0	0	0	0	0	0	0	0	0	0	0	0	0	0
Saudi Arabia	0	0	0	0	0	0	0	0	0	0	0	0	0	0	0	0	0	0	0	0	0	0	0	0	0	0	0	0	0	0	0	0	0	0	0	0	0	0	0	0	0
Senegal	370.11	382.432	395.704	409.697	424.128	438.863	452.425	466.376	480.863	496.058	512.054	527.897	544.559	562.003	580.178	599.015	617.107	636.133	655.923	676.266	697.083	718.067	739.508	761.553	784.508	808.542	832.177	857.317	883.723	910.998	938.974	967.686	996.868	1026.85	1058.11	1090.82	1123.45	1157.54	1192.85	1228.97	1265.64
Serbia	0	0	0	0	0	0	0	0	0	0	0	0	0	0	0	0	0	0	0	0	0	0	0	0	0	0	0	0	0	0	0	0	0	0	0	0	0	0	0	0	0
Seychelles	0	0	0	0	0	0	0	0	0	0	0	0	0	0	0	0	0	0	0	0	0	0	0	0	0	0	0	0	0	0	0	0	0	0	0	0	0	0	0	0	0
Sierra Leone	33585.1	33691.5	33590	33393.2	33232.4	33192.9	33222.8	33416.8	33828.8	34518.4	35501	36839.9	38578.9	40531.2	42474.8	44275.3	45667.6	46880.2	47986.8	49089.3	50255.8	51377.7	52532.1	53734.1	54997.6	56325.3	57569.3	58904.3	60311	61758	63225.4	64593.6	65997	67434.8	68910.6	70423.5	71844.5	73311.1	74817.9	76358	77925.3
Singapore	0	0	0	0	0	0	0	0	0	0	0	0	0	0	0	0	0	0	0	0	0	0	0	0	0	0	0	0	0	0	0	0	0	0	0	0	0	0	0	0	0
Slovakia	0	0	0	0	0	0	0	0	0	0	0	0	0	0	0	0	0	0	0	0	0	0	0	0	0	0	0	0	0	0	0	0	0	0	0	0	0	0	0	0	0
Slovenia	0	0	0	0	0	0	0	0	0	0	0	0	0	0	0	0	0	0	0	0	0	0	0	0	0	0	0	0	0	0	0	0	0	0	0	0	0	0	0	0	0
Solomon Islands	0	0	0	0	0	0	0	0	0	0	0	0	0	0	0	0	0	0	0	0	0	0	0	0	0	0	0	0	0	0	0	0	0	0	0	0	0	0	0	0	0
Somalia	0	0	0	0	0	0	0	0	0	0	0	0	0	0	0	0	0	0	0	0	0	0	0	0	0	0	0	0	0	0	0	0	0	0	0	0	0	0	0	0	0
South Africa	0	0	0	0	0	0	0	0	0	0	0	0	0	0	0	0	0	0	0	0	0	0	0	0	0	0	0	0	0	0	0	0	0	0	0	0	0	0	0	0	0
South Korea	0	0	0	0	0	0	0	0	0	0	0	0	0	0	0	0	0	0	0	0	0	0	0	0	0	0	0	0	0	0	0	0	0	0	0	0	0	0	0	0	0
Spain	0	0	0	0	0	0	0	0	0	0	0	0	0	0	0	0	0	0	0	0	0	0	0	0	0	0	0	0	0	0	0	0	0	0	0	0	0	0	0	0	0
Sri Lanka	0	0	0	0	0	0	0	0	0	0	0	0	0	0	0	0	0	0	0	0	0	0	0	0	0	0	0	0	0	0	0	0	0	0	0	0	0	0	0	0	0
Sudan	141827	146241	151048	156155	161447	166850	171838	177016	182394	187985	193816	199640	205749	212169	218958	226142	233281	240937	249002	257329	265838	274248	282811	291591	300695	310176	319589	329390	339530	349925	360527	370922	381564	392436	403537	414867	426016	437415	449059	460951	473092
Suriname	0	0	0	0	0	0	0	0	0	0	0	0	0	0	0	0	0	0	0	0	0	0	0	0	0	0	0	0	0	0	0	0	0	0	0	0	0	0	0	0	0
Swaziland	0	0	0	0	0	0	0	0	0	0	0	0	0	0	0	0	0	0	0	0	0	0	0	0	0	0	0	0	0	0	0	0	0	0	0	0	0	0	0	0	0
Sweden	0	0	0	0	0	0	0	0	0	0	0	0	0	0	0	0	0	0	0	0	0	0	0	0	0	0	0	0	0	0	0	0	0	0	0	0	0	0	0	0	0
Switzerland	0	0	0	0	0	0	0	0	0	0	0	0	0	0	0	0	0	0	0	0	0	0	0	0	0	0	0	0	0	0	0	0	0	0	0	0	0	0	0	0	0
Syria	0	0	0	0	0	0	0	0	0	0	0	0	0	0	0	0	0	0	0	0	0	0	0	0	0	0	0	0	0	0	0	0	0	0	0	0	0	0	0	0	0
Tajikistan	0	0	0	0	0	0	0	0	0	0	0	0	0	0	0	0	0	0	0	0	0	0	0	0	0	0	0	0	0	0	0	0	0	0	0	0	0	0	0	0	0
Tanzania	46980.8	48542.8	50257.4	52066.7	53898.5	55712.3	57282.9	58827.2	60377.1	61973.8	63642.9	65260.6	66950.7	68720.1	70575.1	72517.6	74499.1	76598.8	78806.9	81120.7	83542.9	86033.7	88695.2	91497.5	94407.7	97414.3	100516	103701	107002	110463	114105	117820	121717	125784	129992	134326	138725	143263	147934	152738	157673
Thailand	0	0	0	0	0	0	0	0	0	0	0	0	0	0	0	0	0	0	0	0	0	0	0	0	0	0	0	0	0	0	0	0	0	0	0	0	0	0	0	0	0
The Bahamas	0	0	0	0	0	0	0	0	0	0	0	0	0	0	0	0	0	0	0	0	0	0	0	0	0	0	0	0	0	0	0	0	0	0	0	0	0	0	0	0	0
The Gambia	0	0	0	0	0	0	0	0	0	0	0	0	0	0	0	0	0	0	0	0	0	0	0	0	0	0	0	0	0	0	0	0	0	0	0	0	0	0	0	0	0
Timor-Leste	0	0	0	0	0	0	0	0	0	0	0	0	0	0	0	0	0	0	0	0	0	0	0	0	0	0	0	0	0	0	0	0	0	0	0	0	0	0	0	0	0
Togo	7742.61	7970.37	8209.47	8459.05	8717.83	8985.63	9256.82	9537.45	9828.17	10129.6	10441.6	10755.5	11079.7	11413.3	11755.2	12104.3	12446.4	12800.5	13164.9	13537.2	13916.2	14299.1	14689.9	15090	15503.1	15931.4	16357.5	16806.5	17274.6	17755.6	18246.7	18756.5	19273.3	19802	20349.8	20918.9	21494.5	22091.9	22707.5	23334.6	23969.1
Tonga	0	0	0	0	0	0	0	0	0	0	0	0	0	0	0	0	0	0	0	0	0	0	0	0	0	0	0	0	0	0	0	0	0	0	0	0	0	0	0	0	0
Trinidad and Tobago	0	0	0	0	0	0	0	0	0	0	0	0	0	0	0	0	0	0	0	0	0	0	0	0	0	0	0	0	0	0	0	0	0	0	0	0	0	0	0	0	0
Tunisia	0	0	0	0	0	0	0	0	0	0	0	0	0	0	0	0	0	0	0	0	0	0	0	0	0	0	0	0	0	0	0	0	0	0	0	0	0	0	0	0	0
Turkey	0	0	0	0	0	0	0	0	0	0	0	0	0	0	0	0	0	0	0	0	0	0	0	0	0	0	0	0	0	0	0	0	0	0	0	0	0	0	0	0	0
Turkmenistan	0	0	0	0	0	0	0	0	0	0	0	0	0	0	0	0	0	0	0	0	0	0	0	0	0	0	0	0	0	0	0	0	0	0	0	0	0	0	0	0	0
Uganda	34971.4	36026.8	37119.7	38249	39418.6	40633.9	41715.1	42863.8	44086.4	45387.4	46771.3	48207.3	49735.3	51355.4	53073.8	54893.5	56752.1	58733.4	60829.5	63029.7	65332	67730.5	70249.2	72887.1	75648	78533.7	81461.1	84524	87720.9	91050.1	94511.6	98029.9	101692	105495	109439	113521	117671	121967	126408	130991	135717
Ukraine	0	0	0	0	0	0	0	0	0	0	0	0	0	0	0	0	0	0	0	0	0	0	0	0	0	0	0	0	0	0	0	0	0	0	0	0	0	0	0	0	0
United Arab Emirates	0	0	0	0	0	0	0	0	0	0	0	0	0	0	0	0	0	0	0	0	0	0	0	0	0	0	0	0	0	0	0	0	0	0	0	0	0	0	0	0	0
United Kingdom	0	0	0	0	0	0	0	0	0	0	0	0	0	0	0	0	0	0	0	0	0	0	0	0	0	0	0	0	0	0	0	0	0	0	0	0	0	0	0	0	0
United States	0	0	0	0	0	0	0	0	0	0	0	0	0	0	0	0	0	0	0	0	0	0	0	0	0	0	0	0	0	0	0	0	0	0	0	0	0	0	0	0	0
Uruguay	0	0	0	0	0	0	0	0	0	0	0	0	0	0	0	0	0	0	0	0	0	0	0	0	0	0	0	0	0	0	0	0	0	0	0	0	0	0	0	0	0
Uzbekistan	0	0	0	0	0	0	0	0	0	0	0	0	0	0	0	0	0	0	0	0	0	0	0	0	0	0	0	0	0	0	0	0	0	0	0	0	0	0	0	0	0
Vanuatu	0	0	0	0	0	0	0	0	0	0	0	0	0	0	0	0	0	0	0	0	0	0	0	0	0	0	0	0	0	0	0	0	0	0	0	0	0	0	0	0	0
Venezuela	0	0	0	0	0	0	0	0	0	0	0	0	0	0	0	0	0	0	0	0	0	0	0	0	0	0	0	0	0	0	0	0	0	0	0	0	0	0	0	0	0
Vietnam	0	0	0	0	0	0	0	0	0	0	0	0	0	0	0	0	0	0	0	0	0	0	0	0	0	0	0	0	0	0	0	0	0	0	0	0	0	0	0	0	0
Yemen	0	0	0	0	0	0	0	0	0	0	0	0	0	0	0	0	0	0	0	0	0	0	0	0	0	0	0	0	0	0	0	0	0	0	0	0	0	0	0	0	0
Zambia	0	0	0	0	0	0	0	0	0	0	0	0	0	0	0	0	0	0	0	0	0	0	0	0	0	0	0	0	0	0	0	0	0	0	0	0	0	0	0	0	0
Zimbabwe	0	0	0	0	0	0	0	0	0	0	0	0	0	0	0	0	0	0	0	0	0	0	0	0	0	0	0	0	0	0	0	0	0	0	0	0	0	0	0	0	0

## Sheet: TOTAL BURDEN 1990-2030
	1990	1991	1992	1993	1994	1995	1996	1997	1998	1999	2000	2001	2002	2003	2004	2005	2006	2007	2008	2009	2010	2011	2012	2013	2014	2015	2016	2017	2018	2019	2020	2021	2022	2023	2024	2025	2026	2027	2028	2029	2030
WORLD
Men	2.95081e+06	3.04063e+06	3.13686e+06	3.23712e+06	3.33876e+06	3.43991e+06	3.53172e+06	3.62538e+06	3.72181e+06	3.82191e+06	3.92575e+06	4.03e+06	4.14137e+06	4.25887e+06	4.38148e+06	4.50814e+06	4.63466e+06	4.76936e+06	4.91078e+06	5.05706e+06	5.20659e+06	5.35572e+06	5.5107e+06	5.67106e+06	5.8366e+06	6.00672e+06	6.17587e+06	6.35315e+06	6.53728e+06	6.72659e+06	6.91958e+06	7.11281e+06	7.31224e+06	7.51723e+06	7.72728e+06	7.94158e+06	8.15518e+06	8.37577e+06	8.60248e+06	8.83419e+06	9.06976e+06
Women	2.52831e+06	2.60412e+06	2.68532e+06	2.76971e+06	2.85485e+06	2.93907e+06	3.0154e+06	3.09258e+06	3.17163e+06	3.25363e+06	3.33889e+06	3.42565e+06	3.51846e+06	3.61642e+06	3.71857e+06	3.82398e+06	3.93017e+06	4.04289e+06	4.16093e+06	4.28279e+06	4.40719e+06	4.53154e+06	4.66046e+06	4.79362e+06	4.9309e+06	5.07188e+06	5.21325e+06	5.36109e+06	5.5144e+06	5.67188e+06	5.83234e+06	5.99389e+06	6.16033e+06	6.3312e+06	6.50613e+06	6.68457e+06	6.86355e+06	7.04814e+06	7.23765e+06	7.43126e+06	7.62813e+06
Total	5.47912e+06	5.64476e+06	5.82218e+06	6.00683e+06	6.1936e+06	6.37898e+06	6.54712e+06	6.71796e+06	6.89344e+06	7.07554e+06	7.26464e+06	7.45565e+06	7.65983e+06	7.87528e+06	8.10005e+06	8.33212e+06	8.56484e+06	8.81225e+06	9.07171e+06	9.33985e+06	9.61378e+06	9.88725e+06	1.01712e+07	1.04647e+07	1.07675e+07	1.10786e+07	1.13891e+07	1.17142e+07	1.20517e+07	1.23985e+07	1.27519e+07	1.31067e+07	1.34726e+07	1.38484e+07	1.42334e+07	1.46261e+07	1.50187e+07	1.54239e+07	1.58401e+07	1.62654e+07	1.66979e+07
MEN
Afghanistan	0	0	0	0	0	0	0	0	0	0	0	0	0	0	0	0	0	0	0	0	0	0	0	0	0	0	0	0	0	0	0	0	0	0	0	0	0	0	0	0	0
Albania	0	0	0	0	0	0	0	0	0	0	0	0	0	0	0	0	0	0	0	0	0	0	0	0	0	0	0	0	0	0	0	0	0	0	0	0	0	0	0	0	0
Algeria	0	0	0	0	0	0	0	0	0	0	0	0	0	0	0	0	0	0	0	0	0	0	0	0	0	0	0	0	0	0	0	0	0	0	0	0	0	0	0	0	0
Angola	13302.4	13683.7	14124.8	14604.4	15095	15578.5	16004.9	16442.1	16902.7	17401.8	17943.8	18511	19148.2	19838.7	20562.7	21305.6	22025	22784.9	23581.7	24415.2	25282.9	26135	27050.9	28019.4	29023.2	30049.1	31093.7	32158.2	33247	34369.4	35527	36648.8	37831.3	39065.2	40335.2	41630.2	42916.6	44250.3	45625	47037.2	48481.7
Antigua and Barbuda	0	0	0	0	0	0	0	0	0	0	0	0	0	0	0	0	0	0	0	0	0	0	0	0	0	0	0	0	0	0	0	0	0	0	0	0	0	0	0	0	0
Argentina	0	0	0	0	0	0	0	0	0	0	0	0	0	0	0	0	0	0	0	0	0	0	0	0	0	0	0	0	0	0	0	0	0	0	0	0	0	0	0	0	0
Armenia	0	0	0	0	0	0	0	0	0	0	0	0	0	0	0	0	0	0	0	0	0	0	0	0	0	0	0	0	0	0	0	0	0	0	0	0	0	0	0	0	0
Australia	0	0	0	0	0	0	0	0	0	0	0	0	0	0	0	0	0	0	0	0	0	0	0	0	0	0	0	0	0	0	0	0	0	0	0	0	0	0	0	0	0
Austria	0	0	0	0	0	0	0	0	0	0	0	0	0	0	0	0	0	0	0	0	0	0	0	0	0	0	0	0	0	0	0	0	0	0	0	0	0	0	0	0	0
Azerbaijan	0	0	0	0	0	0	0	0	0	0	0	0	0	0	0	0	0	0	0	0	0	0	0	0	0	0	0	0	0	0	0	0	0	0	0	0	0	0	0	0	0
Bahrain	0	0	0	0	0	0	0	0	0	0	0	0	0	0	0	0	0	0	0	0	0	0	0	0	0	0	0	0	0	0	0	0	0	0	0	0	0	0	0	0	0
Bangladesh	0	0	0	0	0	0	0	0	0	0	0	0	0	0	0	0	0	0	0	0	0	0	0	0	0	0	0	0	0	0	0	0	0	0	0	0	0	0	0	0	0
Barbados	0	0	0	0	0	0	0	0	0	0	0	0	0	0	0	0	0	0	0	0	0	0	0	0	0	0	0	0	0	0	0	0	0	0	0	0	0	0	0	0	0
Belarus	0	0	0	0	0	0	0	0	0	0	0	0	0	0	0	0	0	0	0	0	0	0	0	0	0	0	0	0	0	0	0	0	0	0	0	0	0	0	0	0	0
Belgium	0	0	0	0	0	0	0	0	0	0	0	0	0	0	0	0	0	0	0	0	0	0	0	0	0	0	0	0	0	0	0	0	0	0	0	0	0	0	0	0	0
Belize	0	0	0	0	0	0	0	0	0	0	0	0	0	0	0	0	0	0	0	0	0	0	0	0	0	0	0	0	0	0	0	0	0	0	0	0	0	0	0	0	0
Benin	55747.6	57963.6	60430.5	63048.7	65687.4	68252.7	70426.7	72569.8	74753.3	77078.5	79609.5	82464.3	85571.7	88876.1	92301.3	95784.1	99157.8	102650	106233	109882	113575	117178	120854	124607	128445	132369	136314	140373	144535	148788	153112	157402	161816	166333	170929	175583	180197	184916	189724	194604	199539
Bhutan	0	0	0	0	0	0	0	0	0	0	0	0	0	0	0	0	0	0	0	0	0	0	0	0	0	0	0	0	0	0	0	0	0	0	0	0	0	0	0	0	0
Bolivia	0	0	0	0	0	0	0	0	0	0	0	0	0	0	0	0	0	0	0	0	0	0	0	0	0	0	0	0	0	0	0	0	0	0	0	0	0	0	0	0	0
Bosnia and Herzegovina	0	0	0	0	0	0	0	0	0	0	0	0	0	0	0	0	0	0	0	0	0	0	0	0	0	0	0	0	0	0	0	0	0	0	0	0	0	0	0	0	0
Botswana	0	0	0	0	0	0	0	0	0	0	0	0	0	0	0	0	0	0	0	0	0	0	0	0	0	0	0	0	0	0	0	0	0	0	0	0	0	0	0	0	0
Brazil	0	0	0	0	0	0	0	0	0	0	0	0	0	0	0	0	0	0	0	0	0	0	0	0	0	0	0	0	0	0	0	0	0	0	0	0	0	0	0	0	0
Brunei	0	0	0	0	0	0	0	0	0	0	0	0	0	0	0	0	0	0	0	0	0	0	0	0	0	0	0	0	0	0	0	0	0	0	0	0	0	0	0	0	0
Bulgaria	0	0	0	0	0	0	0	0	0	0	0	0	0	0	0	0	0	0	0	0	0	0	0	0	0	0	0	0	0	0	0	0	0	0	0	0	0	0	0	0	0
Burkina Faso	63428.1	65115.7	66898.5	68762.7	70694	72670.9	74626.9	76733.3	78968.1	81303.8	83708.9	86153.4	88785.7	91575.8	94490.4	97492.3	100550	103804	107221	110763	114393	118030	121874	125885	130016	134221	138457	142848	147373	152015	156747	161472	166393	171476	176682	181967	187237	192692	198303	204039	209864
Burundi	30952.1	31567.9	32186.4	32805	33418	34024	34603.6	35190.9	35832.9	36588.8	37492	38775.6	40233.8	41827.7	43494.6	45181.4	46852.9	48559.2	50290.6	52045.2	53818.5	55364	57004.8	58729.1	60528	62398.7	64308.5	66332.1	68457.8	70675.9	72974	75284.3	77698.1	80206.9	82795.3	85447.1	88103.2	90836.6	93644.1	96517.8	99445
Cambodia	0	0	0	0	0	0	0	0	0	0	0	0	0	0	0	0	0	0	0	0	0	0	0	0	0	0	0	0	0	0	0	0	0	0	0	0	0	0	0	0	0
Cameroon	222011	228670	235651	242910	250417	258127	265716	273615	281789	290176	298709	307092	315697	324551	333706	343167	352434	362314	372699	383447	394446	405457	416931	428812	441058	453611	466157	479150	492544	506280	520298	534255	548655	563451	578585	593994	609363	625162	641342	657850	674625
Canada	0	0	0	0	0	0	0	0	0	0	0	0	0	0	0	0	0	0	0	0	0	0	0	0	0	0	0	0	0	0	0	0	0	0	0	0	0	0	0	0	0
Cape Verde	0	0	0	0	0	0	0	0	0	0	0	0	0	0	0	0	0	0	0	0	0	0	0	0	0	0	0	0	0	0	0	0	0	0	0	0	0	0	0	0	0
Central African Republic	71917.3	73545.4	75391.5	77388.3	79435.2	81453.1	83343.1	85202.5	87035.4	88863.1	90690.8	92198.6	93816.6	95542.3	97368.5	99288.9	101350	103606	106014	108513	111046	113604	116198	118837	121551	124343	126961	129787	132764	135816	138889	141949	145085	148285	151556	154887	158157	161534	164997	168513	172055
Chad	42480.7	43710.8	45010.5	46385.2	47842.5	49381.1	50904.3	52564.9	54366.2	56310.2	58386.1	60538.8	62885.8	65366.1	67911.2	70475.9	72885.2	75339.3	77858.2	80465	83165.9	85836.8	88662.9	91625.8	94700.9	97864.2	101008	104310	107765	111364	115094	118841	122799	126933	131207	135588	139955	144489	149174	153997	158938
Chile	0	0	0	0	0	0	0	0	0	0	0	0	0	0	0	0	0	0	0	0	0	0	0	0	0	0	0	0	0	0	0	0	0	0	0	0	0	0	0	0	0
China	0	0	0	0	0	0	0	0	0	0	0	0	0	0	0	0	0	0	0	0	0	0	0	0	0	0	0	0	0	0	0	0	0	0	0	0	0	0	0	0	0
Colombia	0	0	0	0	0	0	0	0	0	0	0	0	0	0	0	0	0	0	0	0	0	0	0	0	0	0	0	0	0	0	0	0	0	0	0	0	0	0	0	0	0
Comoros	0	0	0	0	0	0	0	0	0	0	0	0	0	0	0	0	0	0	0	0	0	0	0	0	0	0	0	0	0	0	0	0	0	0	0	0	0	0	0	0	0
Congo	8889.22	9143.49	9405.92	9677.68	9959.36	10250.5	10550.5	10861.4	11178.9	11498.5	11816.9	12099	12388.9	12693.1	13019.1	13371.7	13771.6	14202.8	14654.7	15114.2	15571.1	15985.3	16401.4	16823	17256.6	17706.9	18158.4	18639.3	19146	19672.8	20215.3	20796.1	21387.8	21992.7	22614.9	23254.9	23887.1	24544	25222.5	25917.5	26625.5
Costa Rica	0	0	0	0	0	0	0	0	0	0	0	0	0	0	0	0	0	0	0	0	0	0	0	0	0	0	0	0	0	0	0	0	0	0	0	0	0	0	0	0	0
Côte d’Ivoire	151318	156710	162256	167899	173554	179141	184360	189465	194359	198945	203166	206356	209313	212143	214980	217931	221512	225273	229246	233441	237843	242912	248114	253464	259028	264828	270353	276543	283194	289985	296704	303935	310919	317759	324693	331868	339207	346808	354637	362579	370563
Croatia	0	0	0	0	0	0	0	0	0	0	0	0	0	0	0	0	0	0	0	0	0	0	0	0	0	0	0	0	0	0	0	0	0	0	0	0	0	0	0	0	0
Cuba	0	0	0	0	0	0	0	0	0	0	0	0	0	0	0	0	0	0	0	0	0	0	0	0	0	0	0	0	0	0	0	0	0	0	0	0	0	0	0	0	0
Cyprus	0	0	0	0	0	0	0	0	0	0	0	0	0	0	0	0	0	0	0	0	0	0	0	0	0	0	0	0	0	0	0	0	0	0	0	0	0	0	0	0	0
Czech Republic	0	0	0	0	0	0	0	0	0	0	0	0	0	0	0	0	0	0	0	0	0	0	0	0	0	0	0	0	0	0	0	0	0	0	0	0	0	0	0	0	0
Democratic Republic of the Congo	845619	876651	910908	946385	980943	1.01339e+06	1.03832e+06	1.06167e+06	1.08505e+06	1.11012e+06	1.13769e+06	1.16798e+06	1.2021e+06	1.23911e+06	1.27796e+06	1.31777e+06	1.356e+06	1.39695e+06	1.44015e+06	1.48496e+06	1.53077e+06	1.57532e+06	1.62224e+06	1.67117e+06	1.72175e+06	1.77354e+06	1.82408e+06	1.87717e+06	1.93244e+06	1.98946e+06	2.04772e+06	2.10437e+06	2.16388e+06	2.22575e+06	2.28936e+06	2.35409e+06	2.41735e+06	2.48316e+06	2.5511e+06	2.6207e+06	2.69145e+06
Denmark	0	0	0	0	0	0	0	0	0	0	0	0	0	0	0	0	0	0	0	0	0	0	0	0	0	0	0	0	0	0	0	0	0	0	0	0	0	0	0	0	0
Djibouti	0	0	0	0	0	0	0	0	0	0	0	0	0	0	0	0	0	0	0	0	0	0	0	0	0	0	0	0	0	0	0	0	0	0	0	0	0	0	0	0	0
Dominican Republic	0	0	0	0	0	0	0	0	0	0	0	0	0	0	0	0	0	0	0	0	0	0	0	0	0	0	0	0	0	0	0	0	0	0	0	0	0	0	0	0	0
Ecuador	0	0	0	0	0	0	0	0	0	0	0	0	0	0	0	0	0	0	0	0	0	0	0	0	0	0	0	0	0	0	0	0	0	0	0	0	0	0	0	0	0
Egypt	0	0	0	0	0	0	0	0	0	0	0	0	0	0	0	0	0	0	0	0	0	0	0	0	0	0	0	0	0	0	0	0	0	0	0	0	0	0	0	0	0
El Salvador	0	0	0	0	0	0	0	0	0	0	0	0	0	0	0	0	0	0	0	0	0	0	0	0	0	0	0	0	0	0	0	0	0	0	0	0	0	0	0	0	0
Equatorial Guinea	4138.08	4250.57	4384.15	4533.51	4691.65	4853.5	5026.11	5200.18	5378.73	5565.92	5763.34	5959.37	6168.3	6387.13	6610.08	6832.82	7041.92	7253.35	7468.46	7690.68	7921.31	8143.11	8382.13	8633.97	8892.63	9154.38	9414.34	9679.18	9948.98	10225.1	10508	10785.5	11071.7	11365.4	11664.5	11967.6	12266.3	12570.6	12879.7	13193.4	13510.8
Eritrea	0	0	0	0	0	0	0	0	0	0	0	0	0	0	0	0	0	0	0	0	0	0	0	0	0	0	0	0	0	0	0	0	0	0	0	0	0	0	0	0	0
Estonia	0	0	0	0	0	0	0	0	0	0	0	0	0	0	0	0	0	0	0	0	0	0	0	0	0	0	0	0	0	0	0	0	0	0	0	0	0	0	0	0	0
Ethiopia	90622.2	93675.5	96997	100516	104112	107672	110895	114111	117371	120783	124416	127993	131984	136292	140787	145385	150159	155065	160113	165327	170703	176232	181894	187697	193642	199719	205734	211960	218353	224862	231448	237999	244688	251484	258362	265303	272239	279240	286304	293430	300613
Federated States of Micronesia	0	0	0	0	0	0	0	0	0	0	0	0	0	0	0	0	0	0	0	0	0	0	0	0	0	0	0	0	0	0	0	0	0	0	0	0	0	0	0	0	0
Fiji	0	0	0	0	0	0	0	0	0	0	0	0	0	0	0	0	0	0	0	0	0	0	0	0	0	0	0	0	0	0	0	0	0	0	0	0	0	0	0	0	0
Finland	0	0	0	0	0	0	0	0	0	0	0	0	0	0	0	0	0	0	0	0	0	0	0	0	0	0	0	0	0	0	0	0	0	0	0	0	0	0	0	0	0
France	0	0	0	0	0	0	0	0	0	0	0	0	0	0	0	0	0	0	0	0	0	0	0	0	0	0	0	0	0	0	0	0	0	0	0	0	0	0	0	0	0
Gabon	0	0	0	0	0	0	0	0	0	0	0	0	0	0	0	0	0	0	0	0	0	0	0	0	0	0	0	0	0	0	0	0	0	0	0	0	0	0	0	0	0
Georgia	0	0	0	0	0	0	0	0	0	0	0	0	0	0	0	0	0	0	0	0	0	0	0	0	0	0	0	0	0	0	0	0	0	0	0	0	0	0	0	0	0
Germany	0	0	0	0	0	0	0	0	0	0	0	0	0	0	0	0	0	0	0	0	0	0	0	0	0	0	0	0	0	0	0	0	0	0	0	0	0	0	0	0	0
Ghana	103336	106355	109497	112725	116003	119306	122465	125709	129031	132406	135809	139292	142785	146322	149956	153713	157405	161328	165441	169676	173982	178350	182874	187509	192221	196984	201881	206836	211844	216899	221990	227159	232357	237584	242838	248108	253374	258692	264039	269390	274725
Greece	0	0	0	0	0	0	0	0	0	0	0	0	0	0	0	0	0	0	0	0	0	0	0	0	0	0	0	0	0	0	0	0	0	0	0	0	0	0	0	0	0
Grenada	0	0	0	0	0	0	0	0	0	0	0	0	0	0	0	0	0	0	0	0	0	0	0	0	0	0	0	0	0	0	0	0	0	0	0	0	0	0	0	0	0
Guatemala	0	0	0	0	0	0	0	0	0	0	0	0	0	0	0	0	0	0	0	0	0	0	0	0	0	0	0	0	0	0	0	0	0	0	0	0	0	0	0	0	0
Guinea	49803.7	52489.2	55636.4	58972.7	62178.1	65059.4	67180.6	68906	70375.2	71763.8	73183.9	74525	75932.3	77439.9	79079.4	80859.2	82852.6	85105	87547.3	90094.6	92684.8	95271.6	97964.5	100746	103600	106510	109431	112441	115526	118677	121880	125078	128368	131735	135159	138622	142073	145600	149190	152832	156512
Guinea-Bissau	5027.17	5160.92	5289.62	5414.4	5542.98	5678.38	5799.8	5935.77	6083.85	6238.48	6395.95	6557.23	6725.26	6897.49	7071.85	7246.15	7406	7571.98	7746.25	7931.69	8129.24	8332.98	8556.23	8793.42	9037.52	9283.31	9520.67	9765.01	10016	10274	10538.2	10797.4	11067.2	11345.8	11630.4	11918.8	12199.8	12489.9	12787.8	13092.2	13401.3
Guyana	0	0	0	0	0	0	0	0	0	0	0	0	0	0	0	0	0	0	0	0	0	0	0	0	0	0	0	0	0	0	0	0	0	0	0	0	0	0	0	0	0
Haiti	0	0	0	0	0	0	0	0	0	0	0	0	0	0	0	0	0	0	0	0	0	0	0	0	0	0	0	0	0	0	0	0	0	0	0	0	0	0	0	0	0
Honduras	0	0	0	0	0	0	0	0	0	0	0	0	0	0	0	0	0	0	0	0	0	0	0	0	0	0	0	0	0	0	0	0	0	0	0	0	0	0	0	0	0
Hungary	0	0	0	0	0	0	0	0	0	0	0	0	0	0	0	0	0	0	0	0	0	0	0	0	0	0	0	0	0	0	0	0	0	0	0	0	0	0	0	0	0
Iceland	0	0	0	0	0	0	0	0	0	0	0	0	0	0	0	0	0	0	0	0	0	0	0	0	0	0	0	0	0	0	0	0	0	0	0	0	0	0	0	0	0
India	0	0	0	0	0	0	0	0	0	0	0	0	0	0	0	0	0	0	0	0	0	0	0	0	0	0	0	0	0	0	0	0	0	0	0	0	0	0	0	0	0
Indonesia	0	0	0	0	0	0	0	0	0	0	0	0	0	0	0	0	0	0	0	0	0	0	0	0	0	0	0	0	0	0	0	0	0	0	0	0	0	0	0	0	0
Iran	0	0	0	0	0	0	0	0	0	0	0	0	0	0	0	0	0	0	0	0	0	0	0	0	0	0	0	0	0	0	0	0	0	0	0	0	0	0	0	0	0
Iraq	0	0	0	0	0	0	0	0	0	0	0	0	0	0	0	0	0	0	0	0	0	0	0	0	0	0	0	0	0	0	0	0	0	0	0	0	0	0	0	0	0
Ireland	0	0	0	0	0	0	0	0	0	0	0	0	0	0	0	0	0	0	0	0	0	0	0	0	0	0	0	0	0	0	0	0	0	0	0	0	0	0	0	0	0
Israel	0	0	0	0	0	0	0	0	0	0	0	0	0	0	0	0	0	0	0	0	0	0	0	0	0	0	0	0	0	0	0	0	0	0	0	0	0	0	0	0	0
Italy	0	0	0	0	0	0	0	0	0	0	0	0	0	0	0	0	0	0	0	0	0	0	0	0	0	0	0	0	0	0	0	0	0	0	0	0	0	0	0	0	0
Jamaica	0	0	0	0	0	0	0	0	0	0	0	0	0	0	0	0	0	0	0	0	0	0	0	0	0	0	0	0	0	0	0	0	0	0	0	0	0	0	0	0	0
Japan	0	0	0	0	0	0	0	0	0	0	0	0	0	0	0	0	0	0	0	0	0	0	0	0	0	0	0	0	0	0	0	0	0	0	0	0	0	0	0	0	0
Jordan	0	0	0	0	0	0	0	0	0	0	0	0	0	0	0	0	0	0	0	0	0	0	0	0	0	0	0	0	0	0	0	0	0	0	0	0	0	0	0	0	0
Kazakhstan	0	0	0	0	0	0	0	0	0	0	0	0	0	0	0	0	0	0	0	0	0	0	0	0	0	0	0	0	0	0	0	0	0	0	0	0	0	0	0	0	0
Kenya	0	0	0	0	0	0	0	0	0	0	0	0	0	0	0	0	0	0	0	0	0	0	0	0	0	0	0	0	0	0	0	0	0	0	0	0	0	0	0	0	0
Kiribati	0	0	0	0	0	0	0	0	0	0	0	0	0	0	0	0	0	0	0	0	0	0	0	0	0	0	0	0	0	0	0	0	0	0	0	0	0	0	0	0	0
Kuwait	0	0	0	0	0	0	0	0	0	0	0	0	0	0	0	0	0	0	0	0	0	0	0	0	0	0	0	0	0	0	0	0	0	0	0	0	0	0	0	0	0
Kyrgyzstan	0	0	0	0	0	0	0	0	0	0	0	0	0	0	0	0	0	0	0	0	0	0	0	0	0	0	0	0	0	0	0	0	0	0	0	0	0	0	0	0	0
Laos	0	0	0	0	0	0	0	0	0	0	0	0	0	0	0	0	0	0	0	0	0	0	0	0	0	0	0	0	0	0	0	0	0	0	0	0	0	0	0	0	0
Latvia	0	0	0	0	0	0	0	0	0	0	0	0	0	0	0	0	0	0	0	0	0	0	0	0	0	0	0	0	0	0	0	0	0	0	0	0	0	0	0	0	0
Lebanon	0	0	0	0	0	0	0	0	0	0	0	0	0	0	0	0	0	0	0	0	0	0	0	0	0	0	0	0	0	0	0	0	0	0	0	0	0	0	0	0	0
Lesotho	0	0	0	0	0	0	0	0	0	0	0	0	0	0	0	0	0	0	0	0	0	0	0	0	0	0	0	0	0	0	0	0	0	0	0	0	0	0	0	0	0
Liberia	56530	55668.6	54901.3	54576.5	55100.6	56642.7	59967.9	64617.2	69889.6	74947.9	79290.1	82041.9	83963.5	85528	87335.5	89749.1	93011.8	96963.6	101303	105655	109792	113512	116973	120308	123684	127206	130848	134616	138496	142462	146491	150525	154671	158915	163239	167627	172038	176547	181142	185814	190553
Libya	0	0	0	0	0	0	0	0	0	0	0	0	0	0	0	0	0	0	0	0	0	0	0	0	0	0	0	0	0	0	0	0	0	0	0	0	0	0	0	0	0
Lithuania	0	0	0	0	0	0	0	0	0	0	0	0	0	0	0	0	0	0	0	0	0	0	0	0	0	0	0	0	0	0	0	0	0	0	0	0	0	0	0	0	0
Luxembourg	0	0	0	0	0	0	0	0	0	0	0	0	0	0	0	0	0	0	0	0	0	0	0	0	0	0	0	0	0	0	0	0	0	0	0	0	0	0	0	0	0
Macedonia	0	0	0	0	0	0	0	0	0	0	0	0	0	0	0	0	0	0	0	0	0	0	0	0	0	0	0	0	0	0	0	0	0	0	0	0	0	0	0	0	0
Madagascar	0	0	0	0	0	0	0	0	0	0	0	0	0	0	0	0	0	0	0	0	0	0	0	0	0	0	0	0	0	0	0	0	0	0	0	0	0	0	0	0	0
Malawi	24604.3	25198.4	25520.7	25701.6	25912.2	26261.3	26700.3	27356.9	28158.4	29009.6	29849.3	30682.9	31527.2	32396.7	33309	34270.3	35299.7	36358.7	37457.8	38619.4	39855	41048.9	42405.6	43877.5	45390.1	46899	48512	50063.9	51595.4	53176.7	54842	56458.9	58197.9	60033.9	61918.3	63823.9	65752.2	67720.3	69727.6	71786	73899.2
Malaysia	0	0	0	0	0	0	0	0	0	0	0	0	0	0	0	0	0	0	0	0	0	0	0	0	0	0	0	0	0	0	0	0	0	0	0	0	0	0	0	0	0
Maldives	0	0	0	0	0	0	0	0	0	0	0	0	0	0	0	0	0	0	0	0	0	0	0	0	0	0	0	0	0	0	0	0	0	0	0	0	0	0	0	0	0
Mali	15710.9	16026.3	16416.3	16858.5	17324	17788.5	18231.3	18702.9	19202.7	19732.8	20291.1	20865.1	21501.3	22187.7	22910.2	23654.7	24405.9	25211	26053.9	26915.5	27779.6	28597.6	29447.5	30334.6	31268.6	32252.2	33278	34396.9	35590.4	36833.6	38104.5	39390.7	40734.4	42130	43574.4	45061.3	46556.9	48132.4	49775.9	51471.6	53204.1
Malta	0	0	0	0	0	0	0	0	0	0	0	0	0	0	0	0	0	0	0	0	0	0	0	0	0	0	0	0	0	0	0	0	0	0	0	0	0	0	0	0	0
Mauritania	0	0	0	0	0	0	0	0	0	0	0	0	0	0	0	0	0	0	0	0	0	0	0	0	0	0	0	0	0	0	0	0	0	0	0	0	0	0	0	0	0
Mauritius	0	0	0	0	0	0	0	0	0	0	0	0	0	0	0	0	0	0	0	0	0	0	0	0	0	0	0	0	0	0	0	0	0	0	0	0	0	0	0	0	0
Mexico	0	0	0	0	0	0	0	0	0	0	0	0	0	0	0	0	0	0	0	0	0	0	0	0	0	0	0	0	0	0	0	0	0	0	0	0	0	0	0	0	0
Moldova	0	0	0	0	0	0	0	0	0	0	0	0	0	0	0	0	0	0	0	0	0	0	0	0	0	0	0	0	0	0	0	0	0	0	0	0	0	0	0	0	0
Mongolia	0	0	0	0	0	0	0	0	0	0	0	0	0	0	0	0	0	0	0	0	0	0	0	0	0	0	0	0	0	0	0	0	0	0	0	0	0	0	0	0	0
Montenegro	0	0	0	0	0	0	0	0	0	0	0	0	0	0	0	0	0	0	0	0	0	0	0	0	0	0	0	0	0	0	0	0	0	0	0	0	0	0	0	0	0
Morocco	0	0	0	0	0	0	0	0	0	0	0	0	0	0	0	0	0	0	0	0	0	0	0	0	0	0	0	0	0	0	0	0	0	0	0	0	0	0	0	0	0
Mozambique	0	0	0	0	0	0	0	0	0	0	0	0	0	0	0	0	0	0	0	0	0	0	0	0	0	0	0	0	0	0	0	0	0	0	0	0	0	0	0	0	0
Myanmar	0	0	0	0	0	0	0	0	0	0	0	0	0	0	0	0	0	0	0	0	0	0	0	0	0	0	0	0	0	0	0	0	0	0	0	0	0	0	0	0	0
Namibia	0	0	0	0	0	0	0	0	0	0	0	0	0	0	0	0	0	0	0	0	0	0	0	0	0	0	0	0	0	0	0	0	0	0	0	0	0	0	0	0	0
Nepal	0	0	0	0	0	0	0	0	0	0	0	0	0	0	0	0	0	0	0	0	0	0	0	0	0	0	0	0	0	0	0	0	0	0	0	0	0	0	0	0	0
Netherlands	0	0	0	0	0	0	0	0	0	0	0	0	0	0	0	0	0	0	0	0	0	0	0	0	0	0	0	0	0	0	0	0	0	0	0	0	0	0	0	0	0
New Zealand	0	0	0	0	0	0	0	0	0	0	0	0	0	0	0	0	0	0	0	0	0	0	0	0	0	0	0	0	0	0	0	0	0	0	0	0	0	0	0	0	0
Nicaragua	0	0	0	0	0	0	0	0	0	0	0	0	0	0	0	0	0	0	0	0	0	0	0	0	0	0	0	0	0	0	0	0	0	0	0	0	0	0	0	0	0
Niger	2370.93	2446.34	2532.58	2627.35	2728.12	2832.15	2934.97	3049.01	3171.7	3300.09	3430.87	3550.37	3682.66	3824.87	3973.68	4125.92	4277.86	4440.41	4612.05	4791.56	4977.37	5165.46	5365.92	5577.75	5799.7	6030.08	6261.81	6510.79	6774.83	7051.03	7336.53	7626.52	7933.3	8255.45	8591.79	8940.59	9295.02	9669.91	10063.3	10472.5	10895.1
Nigeria	681981	700273	719274	738926	759156	779807	799830	820886	842795	865316	888195	910171	933361	957611	982791	1.00874e+06	1.03486e+06	1.06264e+06	1.09182e+06	1.1221e+06	1.15323e+06	1.18512e+06	1.21828e+06	1.25268e+06	1.2884e+06	1.32543e+06	1.36273e+06	1.40232e+06	1.4438e+06	1.48658e+06	1.53027e+06	1.57551e+06	1.62176e+06	1.66913e+06	1.71785e+06	1.76795e+06	1.81891e+06	1.8717e+06	1.92617e+06	1.98206e+06	2.03915e+06
North Korea	0	0	0	0	0	0	0	0	0	0	0	0	0	0	0	0	0	0	0	0	0	0	0	0	0	0	0	0	0	0	0	0	0	0	0	0	0	0	0	0	0
Norway	0	0	0	0	0	0	0	0	0	0	0	0	0	0	0	0	0	0	0	0	0	0	0	0	0	0	0	0	0	0	0	0	0	0	0	0	0	0	0	0	0
Oman	0	0	0	0	0	0	0	0	0	0	0	0	0	0	0	0	0	0	0	0	0	0	0	0	0	0	0	0	0	0	0	0	0	0	0	0	0	0	0	0	0
Pakistan	0	0	0	0	0	0	0	0	0	0	0	0	0	0	0	0	0	0	0	0	0	0	0	0	0	0	0	0	0	0	0	0	0	0	0	0	0	0	0	0	0
Palestine	0	0	0	0	0	0	0	0	0	0	0	0	0	0	0	0	0	0	0	0	0	0	0	0	0	0	0	0	0	0	0	0	0	0	0	0	0	0	0	0	0
Panama	0	0	0	0	0	0	0	0	0	0	0	0	0	0	0	0	0	0	0	0	0	0	0	0	0	0	0	0	0	0	0	0	0	0	0	0	0	0	0	0	0
Papua New Guinea	0	0	0	0	0	0	0	0	0	0	0	0	0	0	0	0	0	0	0	0	0	0	0	0	0	0	0	0	0	0	0	0	0	0	0	0	0	0	0	0	0
Paraguay	0	0	0	0	0	0	0	0	0	0	0	0	0	0	0	0	0	0	0	0	0	0	0	0	0	0	0	0	0	0	0	0	0	0	0	0	0	0	0	0	0
Peru	0	0	0	0	0	0	0	0	0	0	0	0	0	0	0	0	0	0	0	0	0	0	0	0	0	0	0	0	0	0	0	0	0	0	0	0	0	0	0	0	0
Philippines	0	0	0	0	0	0	0	0	0	0	0	0	0	0	0	0	0	0	0	0	0	0	0	0	0	0	0	0	0	0	0	0	0	0	0	0	0	0	0	0	0
Poland	0	0	0	0	0	0	0	0	0	0	0	0	0	0	0	0	0	0	0	0	0	0	0	0	0	0	0	0	0	0	0	0	0	0	0	0	0	0	0	0	0
Portugal	0	0	0	0	0	0	0	0	0	0	0	0	0	0	0	0	0	0	0	0	0	0	0	0	0	0	0	0	0	0	0	0	0	0	0	0	0	0	0	0	0
Qatar	0	0	0	0	0	0	0	0	0	0	0	0	0	0	0	0	0	0	0	0	0	0	0	0	0	0	0	0	0	0	0	0	0	0	0	0	0	0	0	0	0
Romania	0	0	0	0	0	0	0	0	0	0	0	0	0	0	0	0	0	0	0	0	0	0	0	0	0	0	0	0	0	0	0	0	0	0	0	0	0	0	0	0	0
Russia	0	0	0	0	0	0	0	0	0	0	0	0	0	0	0	0	0	0	0	0	0	0	0	0	0	0	0	0	0	0	0	0	0	0	0	0	0	0	0	0	0
Rwanda	0	0	0	0	0	0	0	0	0	0	0	0	0	0	0	0	0	0	0	0	0	0	0	0	0	0	0	0	0	0	0	0	0	0	0	0	0	0	0	0	0
Saint Lucia	0	0	0	0	0	0	0	0	0	0	0	0	0	0	0	0	0	0	0	0	0	0	0	0	0	0	0	0	0	0	0	0	0	0	0	0	0	0	0	0	0
Saint Vincent and the Grenadines	0	0	0	0	0	0	0	0	0	0	0	0	0	0	0	0	0	0	0	0	0	0	0	0	0	0	0	0	0	0	0	0	0	0	0	0	0	0	0	0	0
Samoa	0	0	0	0	0	0	0	0	0	0	0	0	0	0	0	0	0	0	0	0	0	0	0	0	0	0	0	0	0	0	0	0	0	0	0	0	0	0	0	0	0
São Tomé and Príncipe	0	0	0	0	0	0	0	0	0	0	0	0	0	0	0	0	0	0	0	0	0	0	0	0	0	0	0	0	0	0	0	0	0	0	0	0	0	0	0	0	0
Saudi Arabia	0	0	0	0	0	0	0	0	0	0	0	0	0	0	0	0	0	0	0	0	0	0	0	0	0	0	0	0	0	0	0	0	0	0	0	0	0	0	0	0	0
Senegal	641.475	661.365	682.714	704.886	727.071	748.733	767.474	786.059	804.931	824.635	845.43	867.09	890.375	915.055	940.794	967.251	992.815	1020.14	1049.09	1079.52	1111.37	1145.4	1181.02	1218.15	1256.83	1297.02	1336.83	1379.06	1423.22	1468.6	1514.72	1562.11	1609.74	1657.94	1707.29	1758.03	1808.42	1860.48	1913.99	1968.51	2023.71
Serbia	0	0	0	0	0	0	0	0	0	0	0	0	0	0	0	0	0	0	0	0	0	0	0	0	0	0	0	0	0	0	0	0	0	0	0	0	0	0	0	0	0
Seychelles	0	0	0	0	0	0	0	0	0	0	0	0	0	0	0	0	0	0	0	0	0	0	0	0	0	0	0	0	0	0	0	0	0	0	0	0	0	0	0	0	0
Sierra Leone	51287.1	51430.1	51225.3	50838.4	50463.5	50219.7	50137.1	50285.8	50746.7	51611.8	52901	54815.5	57353.3	60230.7	63111.2	65783.9	67959	69897.9	71686.5	73446.7	75253.4	77026.1	78813.5	80626.2	82474	84354.2	86145	88033	89991.4	91980.9	93971.1	95874.4	97827.5	99818.9	101841	103881	105847	107872	109942	112038	114146
Singapore	0	0	0	0	0	0	0	0	0	0	0	0	0	0	0	0	0	0	0	0	0	0	0	0	0	0	0	0	0	0	0	0	0	0	0	0	0	0	0	0	0
Slovakia	0	0	0	0	0	0	0	0	0	0	0	0	0	0	0	0	0	0	0	0	0	0	0	0	0	0	0	0	0	0	0	0	0	0	0	0	0	0	0	0	0
Slovenia	0	0	0	0	0	0	0	0	0	0	0	0	0	0	0	0	0	0	0	0	0	0	0	0	0	0	0	0	0	0	0	0	0	0	0	0	0	0	0	0	0
Solomon Islands	0	0	0	0	0	0	0	0	0	0	0	0	0	0	0	0	0	0	0	0	0	0	0	0	0	0	0	0	0	0	0	0	0	0	0	0	0	0	0	0	0
Somalia	0	0	0	0	0	0	0	0	0	0	0	0	0	0	0	0	0	0	0	0	0	0	0	0	0	0	0	0	0	0	0	0	0	0	0	0	0	0	0	0	0
South Africa	0	0	0	0	0	0	0	0	0	0	0	0	0	0	0	0	0	0	0	0	0	0	0	0	0	0	0	0	0	0	0	0	0	0	0	0	0	0	0	0	0
South Korea	0	0	0	0	0	0	0	0	0	0	0	0	0	0	0	0	0	0	0	0	0	0	0	0	0	0	0	0	0	0	0	0	0	0	0	0	0	0	0	0	0
Spain	0	0	0	0	0	0	0	0	0	0	0	0	0	0	0	0	0	0	0	0	0	0	0	0	0	0	0	0	0	0	0	0	0	0	0	0	0	0	0	0	0
Sri Lanka	0	0	0	0	0	0	0	0	0	0	0	0	0	0	0	0	0	0	0	0	0	0	0	0	0	0	0	0	0	0	0	0	0	0	0	0	0	0	0	0	0
Sudan	222108	228805	236082	243769	251665	259624	267048	274785	282842	291219	299906	308771	318071	327807	338020	348696	359437	370913	382935	395243	407661	419974	432389	444974	457851	471072	484213	497787	511736	525964	540394	554635	569212	584079	599200	614534	629688	645157	660912	676924	693156
Suriname	0	0	0	0	0	0	0	0	0	0	0	0	0	0	0	0	0	0	0	0	0	0	0	0	0	0	0	0	0	0	0	0	0	0	0	0	0	0	0	0	0
Swaziland	0	0	0	0	0	0	0	0	0	0	0	0	0	0	0	0	0	0	0	0	0	0	0	0	0	0	0	0	0	0	0	0	0	0	0	0	0	0	0	0	0
Sweden	0	0	0	0	0	0	0	0	0	0	0	0	0	0	0	0	0	0	0	0	0	0	0	0	0	0	0	0	0	0	0	0	0	0	0	0	0	0	0	0	0
Switzerland	0	0	0	0	0	0	0	0	0	0	0	0	0	0	0	0	0	0	0	0	0	0	0	0	0	0	0	0	0	0	0	0	0	0	0	0	0	0	0	0	0
Syria	0	0	0	0	0	0	0	0	0	0	0	0	0	0	0	0	0	0	0	0	0	0	0	0	0	0	0	0	0	0	0	0	0	0	0	0	0	0	0	0	0
Tajikistan	0	0	0	0	0	0	0	0	0	0	0	0	0	0	0	0	0	0	0	0	0	0	0	0	0	0	0	0	0	0	0	0	0	0	0	0	0	0	0	0	0
Tanzania	70947.8	73360.3	75990.5	78749.7	81525.5	84244.5	86703.9	89123.7	91542.4	94009.7	96550.6	99078.8	101720	104484	107377	110398	113500	116812	120322	124021	127901	131885	136166	140682	145356	150136	155061	160065	165172	170426	175845	181315	186966	192795	198785	204922	211139	217543	224125	230880	237799
Thailand	0	0	0	0	0	0	0	0	0	0	0	0	0	0	0	0	0	0	0	0	0	0	0	0	0	0	0	0	0	0	0	0	0	0	0	0	0	0	0	0	0
The Bahamas	0	0	0	0	0	0	0	0	0	0	0	0	0	0	0	0	0	0	0	0	0	0	0	0	0	0	0	0	0	0	0	0	0	0	0	0	0	0	0	0	0
The Gambia	0	0	0	0	0	0	0	0	0	0	0	0	0	0	0	0	0	0	0	0	0	0	0	0	0	0	0	0	0	0	0	0	0	0	0	0	0	0	0	0	0
Timor-Leste	0	0	0	0	0	0	0	0	0	0	0	0	0	0	0	0	0	0	0	0	0	0	0	0	0	0	0	0	0	0	0	0	0	0	0	0	0	0	0	0	0
Togo	12317	12609.4	12902.2	13201.7	13516.4	13851.6	14228.9	14634.2	15063.4	15509.8	15966.9	16432	16914.9	17413.8	17927.1	18452.7	18972.8	19518.2	20084.9	20667.8	21262.9	21868.7	22492	23132.2	23791.9	24471.3	25149.2	25863.1	26604.3	27360.3	28122.9	28904.1	29687.3	30476.8	31279.8	32098.8	32914.3	33752.7	34610.4	35480.9	36359.5
Tonga	0	0	0	0	0	0	0	0	0	0	0	0	0	0	0	0	0	0	0	0	0	0	0	0	0	0	0	0	0	0	0	0	0	0	0	0	0	0	0	0	0
Trinidad and Tobago	0	0	0	0	0	0	0	0	0	0	0	0	0	0	0	0	0	0	0	0	0	0	0	0	0	0	0	0	0	0	0	0	0	0	0	0	0	0	0	0	0
Tunisia	0	0	0	0	0	0	0	0	0	0	0	0	0	0	0	0	0	0	0	0	0	0	0	0	0	0	0	0	0	0	0	0	0	0	0	0	0	0	0	0	0
Turkey	0	0	0	0	0	0	0	0	0	0	0	0	0	0	0	0	0	0	0	0	0	0	0	0	0	0	0	0	0	0	0	0	0	0	0	0	0	0	0	0	0
Turkmenistan	0	0	0	0	0	0	0	0	0	0	0	0	0	0	0	0	0	0	0	0	0	0	0	0	0	0	0	0	0	0	0	0	0	0	0	0	0	0	0	0	0
Uganda	53715.3	55459.8	57267.9	59135.8	61064.6	63052.5	64952.3	66974.1	69118.7	71379.4	73744.7	76224.9	78847.5	81603.5	84489.9	87498.9	90548.1	93784.6	97192.1	100747	104430	108220	112180	116302	120575	124988	129469	134123	138943	143919	149042	154238	159617	165171	170888	176754	182699	188828	195131	201601	208228
Ukraine	0	0	0	0	0	0	0	0	0	0	0	0	0	0	0	0	0	0	0	0	0	0	0	0	0	0	0	0	0	0	0	0	0	0	0	0	0	0	0	0	0
United Arab Emirates	0	0	0	0	0	0	0	0	0	0	0	0	0	0	0	0	0	0	0	0	0	0	0	0	0	0	0	0	0	0	0	0	0	0	0	0	0	0	0	0	0
United Kingdom	0	0	0	0	0	0	0	0	0	0	0	0	0	0	0	0	0	0	0	0	0	0	0	0	0	0	0	0	0	0	0	0	0	0	0	0	0	0	0	0	0
United States	0	0	0	0	0	0	0	0	0	0	0	0	0	0	0	0	0	0	0	0	0	0	0	0	0	0	0	0	0	0	0	0	0	0	0	0	0	0	0	0	0
Uruguay	0	0	0	0	0	0	0	0	0	0	0	0	0	0	0	0	0	0	0	0	0	0	0	0	0	0	0	0	0	0	0	0	0	0	0	0	0	0	0	0	0
Uzbekistan	0	0	0	0	0	0	0	0	0	0	0	0	0	0	0	0	0	0	0	0	0	0	0	0	0	0	0	0	0	0	0	0	0	0	0	0	0	0	0	0	0
Vanuatu	0	0	0	0	0	0	0	0	0	0	0	0	0	0	0	0	0	0	0	0	0	0	0	0	0	0	0	0	0	0	0	0	0	0	0	0	0	0	0	0	0
Venezuela	0	0	0	0	0	0	0	0	0	0	0	0	0	0	0	0	0	0	0	0	0	0	0	0	0	0	0	0	0	0	0	0	0	0	0	0	0	0	0	0	0
Vietnam	0	0	0	0	0	0	0	0	0	0	0	0	0	0	0	0	0	0	0	0	0	0	0	0	0	0	0	0	0	0	0	0	0	0	0	0	0	0	0	0	0
Yemen	0	0	0	0	0	0	0	0	0	0	0	0	0	0	0	0	0	0	0	0	0	0	0	0	0	0	0	0	0	0	0	0	0	0	0	0	0	0	0	0	0
Zambia	0	0	0	0	0	0	0	0	0	0	0	0	0	0	0	0	0	0	0	0	0	0	0	0	0	0	0	0	0	0	0	0	0	0	0	0	0	0	0	0	0
Zimbabwe	0	0	0	0	0	0	0	0	0	0	0	0	0	0	0	0	0	0	0	0	0	0	0	0	0	0	0	0	0	0	0	0	0	0	0	0	0	0	0	0	0
WOMEN
Afghanistan	0	0	0	0	0	0	0	0	0	0	0	0	0	0	0	0	0	0	0	0	0	0	0	0	0	0	0	0	0	0	0	0	0	0	0	0	0	0	0	0	0
Albania	0	0	0	0	0	0	0	0	0	0	0	0	0	0	0	0	0	0	0	0	0	0	0	0	0	0	0	0	0	0	0	0	0	0	0	0	0	0	0	0	0
Algeria	0	0	0	0	0	0	0	0	0	0	0	0	0	0	0	0	0	0	0	0	0	0	0	0	0	0	0	0	0	0	0	0	0	0	0	0	0	0	0	0	0
Angola	10965.5	11282.4	11648.1	12043.8	12446.3	12840.4	13191.8	13547.1	13917.8	14317.7	14751.3	15210.5	15723	16276.1	16854.6	17447.1	18022.4	18629.3	19264.7	19928	20617.1	21297.4	22026.9	22796.3	23592	24403.4	25234.1	26077.1	26936.5	27820.6	28731.7	29620.2	30555.1	31529.3	32531.4	33552.6	34572.9	35629.1	36716.5	37832.8	38974.1
Antigua and Barbuda	0	0	0	0	0	0	0	0	0	0	0	0	0	0	0	0	0	0	0	0	0	0	0	0	0	0	0	0	0	0	0	0	0	0	0	0	0	0	0	0	0
Argentina	0	0	0	0	0	0	0	0	0	0	0	0	0	0	0	0	0	0	0	0	0	0	0	0	0	0	0	0	0	0	0	0	0	0	0	0	0	0	0	0	0
Armenia	0	0	0	0	0	0	0	0	0	0	0	0	0	0	0	0	0	0	0	0	0	0	0	0	0	0	0	0	0	0	0	0	0	0	0	0	0	0	0	0	0
Australia	0	0	0	0	0	0	0	0	0	0	0	0	0	0	0	0	0	0	0	0	0	0	0	0	0	0	0	0	0	0	0	0	0	0	0	0	0	0	0	0	0
Austria	0	0	0	0	0	0	0	0	0	0	0	0	0	0	0	0	0	0	0	0	0	0	0	0	0	0	0	0	0	0	0	0	0	0	0	0	0	0	0	0	0
Azerbaijan	0	0	0	0	0	0	0	0	0	0	0	0	0	0	0	0	0	0	0	0	0	0	0	0	0	0	0	0	0	0	0	0	0	0	0	0	0	0	0	0	0
Bahrain	0	0	0	0	0	0	0	0	0	0	0	0	0	0	0	0	0	0	0	0	0	0	0	0	0	0	0	0	0	0	0	0	0	0	0	0	0	0	0	0	0
Bangladesh	0	0	0	0	0	0	0	0	0	0	0	0	0	0	0	0	0	0	0	0	0	0	0	0	0	0	0	0	0	0	0	0	0	0	0	0	0	0	0	0	0
Barbados	0	0	0	0	0	0	0	0	0	0	0	0	0	0	0	0	0	0	0	0	0	0	0	0	0	0	0	0	0	0	0	0	0	0	0	0	0	0	0	0	0
Belarus	0	0	0	0	0	0	0	0	0	0	0	0	0	0	0	0	0	0	0	0	0	0	0	0	0	0	0	0	0	0	0	0	0	0	0	0	0	0	0	0	0
Belgium	0	0	0	0	0	0	0	0	0	0	0	0	0	0	0	0	0	0	0	0	0	0	0	0	0	0	0	0	0	0	0	0	0	0	0	0	0	0	0	0	0
Belize	0	0	0	0	0	0	0	0	0	0	0	0	0	0	0	0	0	0	0	0	0	0	0	0	0	0	0	0	0	0	0	0	0	0	0	0	0	0	0	0	0
Benin	51424.1	53143.7	55005.8	56961.1	58949.5	60928.4	62756.7	64611.9	66518.8	68511.9	70611.7	72877.5	75273.8	77778.8	80366.8	83014.2	85657.8	88403.8	91233	94121.6	97052.2	99989.5	102988	106048	109174	112366	115600	118921	122321	125789	129312	132856	136487	140193	143959	147771	151603	155513	159491	163523	167598
Bhutan	0	0	0	0	0	0	0	0	0	0	0	0	0	0	0	0	0	0	0	0	0	0	0	0	0	0	0	0	0	0	0	0	0	0	0	0	0	0	0	0	0
Bolivia	0	0	0	0	0	0	0	0	0	0	0	0	0	0	0	0	0	0	0	0	0	0	0	0	0	0	0	0	0	0	0	0	0	0	0	0	0	0	0	0	0
Bosnia and Herzegovina	0	0	0	0	0	0	0	0	0	0	0	0	0	0	0	0	0	0	0	0	0	0	0	0	0	0	0	0	0	0	0	0	0	0	0	0	0	0	0	0	0
Botswana	0	0	0	0	0	0	0	0	0	0	0	0	0	0	0	0	0	0	0	0	0	0	0	0	0	0	0	0	0	0	0	0	0	0	0	0	0	0	0	0	0
Brazil	0	0	0	0	0	0	0	0	0	0	0	0	0	0	0	0	0	0	0	0	0	0	0	0	0	0	0	0	0	0	0	0	0	0	0	0	0	0	0	0	0
Brunei	0	0	0	0	0	0	0	0	0	0	0	0	0	0	0	0	0	0	0	0	0	0	0	0	0	0	0	0	0	0	0	0	0	0	0	0	0	0	0	0	0
Bulgaria	0	0	0	0	0	0	0	0	0	0	0	0	0	0	0	0	0	0	0	0	0	0	0	0	0	0	0	0	0	0	0	0	0	0	0	0	0	0	0	0	0
Burkina Faso	67392.3	69135.9	70961.2	72859.4	74822.8	76835.2	78816.3	80944.5	83194.3	85532.6	87925.4	90310.2	92856.2	95536.9	98324.2	101187	104072	107130	110332	113650	117052	120458	124055	127808	131673	135609	139574	143682	147913	152255	156687	161125	165741	170508	175392	180359	185331	190475	195763	201173	206674
Burundi	27612.7	28201.9	28830.1	29470.3	30082.3	30639.6	31030.2	31384.3	31758.6	32229.3	32844.8	33830.9	34984.8	36275.4	37648.2	39055.2	40478.9	41957.5	43472.1	45009.4	46561.1	47963.6	49426.2	50947.7	52529.6	54174.6	55868.1	57652.8	59520.4	61465.1	63478.9	65512.7	67635.2	69838.7	72109.2	74434.2	76782.7	79192	81661	84185.6	86757.4
Cambodia	0	0	0	0	0	0	0	0	0	0	0	0	0	0	0	0	0	0	0	0	0	0	0	0	0	0	0	0	0	0	0	0	0	0	0	0	0	0	0	0	0
Cameroon	196914	202689	208739	215022	221502	228141	234687	241464	248448	255590	262839	269938	277203	284662	292365	300323	308136	316464	325220	334292	343588	352954	362725	372844	383267	393944	404672	415749	427151	438852	450808	462730	475060	487747	500729	513947	527243	540881	554836	569082	583584
Canada	0	0	0	0	0	0	0	0	0	0	0	0	0	0	0	0	0	0	0	0	0	0	0	0	0	0	0	0	0	0	0	0	0	0	0	0	0	0	0	0	0
Cape Verde	0	0	0	0	0	0	0	0	0	0	0	0	0	0	0	0	0	0	0	0	0	0	0	0	0	0	0	0	0	0	0	0	0	0	0	0	0	0	0	0	0
Central African Republic	64777.9	66293.1	67983.2	69791.3	71632.3	73439.9	75140	76796.3	78414.5	80016.5	81610	82934.5	84339.5	85826.8	87395.3	89043.7	90821.6	92758.7	94819.6	96955.9	99123	101340	103580	105854	108189	110592	112879	115334	117913	120556	123220	125907	128653	131452	134308	137215	140115	143089	146127	149211	152324
Chad	35906.1	36908.8	37967.6	39086.4	40271.2	41520.4	42760.8	44112.9	45577.8	47155	48835	50580.8	52478.7	54479.1	56526.3	58583.5	60518.8	62483	64494.5	66574.7	68729.3	70867.2	73132.8	75508.6	77972.3	80503.2	83028.3	85678.5	88448.1	91331.4	94315.6	97324.7	100498	103811	107234	110742	114251	117894	121659	125532	129499
Chile	0	0	0	0	0	0	0	0	0	0	0	0	0	0	0	0	0	0	0	0	0	0	0	0	0	0	0	0	0	0	0	0	0	0	0	0	0	0	0	0	0
China	0	0	0	0	0	0	0	0	0	0	0	0	0	0	0	0	0	0	0	0	0	0	0	0	0	0	0	0	0	0	0	0	0	0	0	0	0	0	0	0	0
Colombia	0	0	0	0	0	0	0	0	0	0	0	0	0	0	0	0	0	0	0	0	0	0	0	0	0	0	0	0	0	0	0	0	0	0	0	0	0	0	0	0	0
Comoros	0	0	0	0	0	0	0	0	0	0	0	0	0	0	0	0	0	0	0	0	0	0	0	0	0	0	0	0	0	0	0	0	0	0	0	0	0	0	0	0	0
Congo	7093.93	7293.39	7499.01	7711.45	7930.92	8157.06	8389.84	8630.03	8874.49	9119.89	9363.97	9582.11	9805.55	10039.8	10291.2	10563.6	10873.6	11208.1	11558.9	11915.5	12269.9	12596.2	12923.7	13255.4	13596.2	13949.7	14306.1	14684.4	15082.4	15495.5	15920.6	16376.3	16839.7	17312.9	17799.1	18299	18795.9	19311.7	19844.3	20390	20946.4
Costa Rica	0	0	0	0	0	0	0	0	0	0	0	0	0	0	0	0	0	0	0	0	0	0	0	0	0	0	0	0	0	0	0	0	0	0	0	0	0	0	0	0	0
Côte d’Ivoire	123629	128293	133072	137921	142770	147560	152084	156495	160743	164792	168626	171817	174928	178010	181119	184300	187978	191762	195691	199799	204097	208982	213966	219075	224381	229919	235272	241233	247624	254160	260645	267575	274280	280851	287500	294363	301364	308580	315989	323503	331069
Croatia	0	0	0	0	0	0	0	0	0	0	0	0	0	0	0	0	0	0	0	0	0	0	0	0	0	0	0	0	0	0	0	0	0	0	0	0	0	0	0	0	0
Cuba	0	0	0	0	0	0	0	0	0	0	0	0	0	0	0	0	0	0	0	0	0	0	0	0	0	0	0	0	0	0	0	0	0	0	0	0	0	0	0	0	0
Cyprus	0	0	0	0	0	0	0	0	0	0	0	0	0	0	0	0	0	0	0	0	0	0	0	0	0	0	0	0	0	0	0	0	0	0	0	0	0	0	0	0	0
Czech Republic	0	0	0	0	0	0	0	0	0	0	0	0	0	0	0	0	0	0	0	0	0	0	0	0	0	0	0	0	0	0	0	0	0	0	0	0	0	0	0	0	0
Democratic Republic of the Congo	755699	782228	811559	841920	871401	898937	920058	939651	959150	980096	1.00324e+06	1.02891e+06	1.05794e+06	1.08952e+06	1.12269e+06	1.15669e+06	1.18968e+06	1.22492e+06	1.26204e+06	1.30055e+06	1.33998e+06	1.37852e+06	1.41919e+06	1.46164e+06	1.50552e+06	1.55041e+06	1.59465e+06	1.64094e+06	1.68901e+06	1.73857e+06	1.78926e+06	1.83896e+06	1.89109e+06	1.94522e+06	2.00084e+06	2.05747e+06	2.11329e+06	2.17122e+06	2.23092e+06	2.29208e+06	2.35428e+06
Denmark	0	0	0	0	0	0	0	0	0	0	0	0	0	0	0	0	0	0	0	0	0	0	0	0	0	0	0	0	0	0	0	0	0	0	0	0	0	0	0	0	0
Djibouti	0	0	0	0	0	0	0	0	0	0	0	0	0	0	0	0	0	0	0	0	0	0	0	0	0	0	0	0	0	0	0	0	0	0	0	0	0	0	0	0	0
Dominican Republic	0	0	0	0	0	0	0	0	0	0	0	0	0	0	0	0	0	0	0	0	0	0	0	0	0	0	0	0	0	0	0	0	0	0	0	0	0	0	0	0	0
Ecuador	0	0	0	0	0	0	0	0	0	0	0	0	0	0	0	0	0	0	0	0	0	0	0	0	0	0	0	0	0	0	0	0	0	0	0	0	0	0	0	0	0
Egypt	0	0	0	0	0	0	0	0	0	0	0	0	0	0	0	0	0	0	0	0	0	0	0	0	0	0	0	0	0	0	0	0	0	0	0	0	0	0	0	0	0
El Salvador	0	0	0	0	0	0	0	0	0	0	0	0	0	0	0	0	0	0	0	0	0	0	0	0	0	0	0	0	0	0	0	0	0	0	0	0	0	0	0	0	0
Equatorial Guinea	3427.66	3518.77	3626.21	3745.78	3872.22	4001.87	4141.08	4280.69	4423.04	4571.75	4728.24	4883.53	5048.74	5222	5399.33	5577.76	5749.39	5924.52	6103.85	6289.55	6482.42	6670.51	6872.87	7086.2	7305.84	7528.69	7750.79	7978.31	8210.86	8449.04	8692.69	8933.99	9182.24	9436.73	9696.22	9959.6	10219.8	10485.8	10756.8	11031.9	11310.5
Eritrea	0	0	0	0	0	0	0	0	0	0	0	0	0	0	0	0	0	0	0	0	0	0	0	0	0	0	0	0	0	0	0	0	0	0	0	0	0	0	0	0	0
Estonia	0	0	0	0	0	0	0	0	0	0	0	0	0	0	0	0	0	0	0	0	0	0	0	0	0	0	0	0	0	0	0	0	0	0	0	0	0	0	0	0	0
Ethiopia	74817.8	77350.5	80128.1	83078.7	86083.2	89036.1	91645.7	94250.4	96888.5	99644.6	102574	105506	108754	112246	115885	119606	123495	127494	131605	135839	140189	144663	149220	153874	158642	163524	168378	173409	178576	183829	189132	194424	199811	205275	210809	216405	222030	227713	233450	239241	245083
Federated States of Micronesia	0	0	0	0	0	0	0	0	0	0	0	0	0	0	0	0	0	0	0	0	0	0	0	0	0	0	0	0	0	0	0	0	0	0	0	0	0	0	0	0	0
Fiji	0	0	0	0	0	0	0	0	0	0	0	0	0	0	0	0	0	0	0	0	0	0	0	0	0	0	0	0	0	0	0	0	0	0	0	0	0	0	0	0	0
Finland	0	0	0	0	0	0	0	0	0	0	0	0	0	0	0	0	0	0	0	0	0	0	0	0	0	0	0	0	0	0	0	0	0	0	0	0	0	0	0	0	0
France	0	0	0	0	0	0	0	0	0	0	0	0	0	0	0	0	0	0	0	0	0	0	0	0	0	0	0	0	0	0	0	0	0	0	0	0	0	0	0	0	0
Gabon	0	0	0	0	0	0	0	0	0	0	0	0	0	0	0	0	0	0	0	0	0	0	0	0	0	0	0	0	0	0	0	0	0	0	0	0	0	0	0	0	0
Georgia	0	0	0	0	0	0	0	0	0	0	0	0	0	0	0	0	0	0	0	0	0	0	0	0	0	0	0	0	0	0	0	0	0	0	0	0	0	0	0	0	0
Germany	0	0	0	0	0	0	0	0	0	0	0	0	0	0	0	0	0	0	0	0	0	0	0	0	0	0	0	0	0	0	0	0	0	0	0	0	0	0	0	0	0
Ghana	84353.6	87034	89874.9	92805.3	95741.5	98629.8	101321	104010	106752	109616	112645	116096	119704	123472	127406	131499	135611	139949	144412	148858	153180	156921	160541	164080	167621	171229	175110	179064	183079	187126	191184	195387	199603	203837	208093	212369	216709	221085	225482	229882	234271
Greece	0	0	0	0	0	0	0	0	0	0	0	0	0	0	0	0	0	0	0	0	0	0	0	0	0	0	0	0	0	0	0	0	0	0	0	0	0	0	0	0	0
Grenada	0	0	0	0	0	0	0	0	0	0	0	0	0	0	0	0	0	0	0	0	0	0	0	0	0	0	0	0	0	0	0	0	0	0	0	0	0	0	0	0	0
Guatemala	0	0	0	0	0	0	0	0	0	0	0	0	0	0	0	0	0	0	0	0	0	0	0	0	0	0	0	0	0	0	0	0	0	0	0	0	0	0	0	0	0
Guinea	41349.2	43537.7	46097.5	48802	51384.9	53684.9	55350.9	56673.5	57768.8	58783.5	59811.8	60785.3	61803.3	62897.6	64099.2	65418.5	66960.7	68725.5	70650.1	72656.3	74686.4	76721.6	78832.7	81006.8	83234.6	85504.3	87793.8	90156.5	92580.1	95052.3	97560	100083	102676	105326	108019	110741	113474	116267	119111	121994	124907
Guinea-Bissau	4011.81	4121.16	4225.6	4325.98	4428.46	4535.68	4633.1	4740.68	4856.35	4975.4	5094.81	5216.48	5340.58	5466.18	5593.24	5721.34	5844.91	5974.16	6110.4	6255.11	6408.62	6569.88	6745.06	6930.04	7119.77	7310.54	7498.08	7689.89	7886.04	8087.2	8293.27	8498.91	8712.14	8931.44	9154.76	9380.44	9603.59	9832.25	10066	10304.4	10546.8
Guyana	0	0	0	0	0	0	0	0	0	0	0	0	0	0	0	0	0	0	0	0	0	0	0	0	0	0	0	0	0	0	0	0	0	0	0	0	0	0	0	0	0
Haiti	0	0	0	0	0	0	0	0	0	0	0	0	0	0	0	0	0	0	0	0	0	0	0	0	0	0	0	0	0	0	0	0	0	0	0	0	0	0	0	0	0
Honduras	0	0	0	0	0	0	0	0	0	0	0	0	0	0	0	0	0	0	0	0	0	0	0	0	0	0	0	0	0	0	0	0	0	0	0	0	0	0	0	0	0
Hungary	0	0	0	0	0	0	0	0	0	0	0	0	0	0	0	0	0	0	0	0	0	0	0	0	0	0	0	0	0	0	0	0	0	0	0	0	0	0	0	0	0
Iceland	0	0	0	0	0	0	0	0	0	0	0	0	0	0	0	0	0	0	0	0	0	0	0	0	0	0	0	0	0	0	0	0	0	0	0	0	0	0	0	0	0
India	0	0	0	0	0	0	0	0	0	0	0	0	0	0	0	0	0	0	0	0	0	0	0	0	0	0	0	0	0	0	0	0	0	0	0	0	0	0	0	0	0
Indonesia	0	0	0	0	0	0	0	0	0	0	0	0	0	0	0	0	0	0	0	0	0	0	0	0	0	0	0	0	0	0	0	0	0	0	0	0	0	0	0	0	0
Iran	0	0	0	0	0	0	0	0	0	0	0	0	0	0	0	0	0	0	0	0	0	0	0	0	0	0	0	0	0	0	0	0	0	0	0	0	0	0	0	0	0
Iraq	0	0	0	0	0	0	0	0	0	0	0	0	0	0	0	0	0	0	0	0	0	0	0	0	0	0	0	0	0	0	0	0	0	0	0	0	0	0	0	0	0
Ireland	0	0	0	0	0	0	0	0	0	0	0	0	0	0	0	0	0	0	0	0	0	0	0	0	0	0	0	0	0	0	0	0	0	0	0	0	0	0	0	0	0
Israel	0	0	0	0	0	0	0	0	0	0	0	0	0	0	0	0	0	0	0	0	0	0	0	0	0	0	0	0	0	0	0	0	0	0	0	0	0	0	0	0	0
Italy	0	0	0	0	0	0	0	0	0	0	0	0	0	0	0	0	0	0	0	0	0	0	0	0	0	0	0	0	0	0	0	0	0	0	0	0	0	0	0	0	0
Jamaica	0	0	0	0	0	0	0	0	0	0	0	0	0	0	0	0	0	0	0	0	0	0	0	0	0	0	0	0	0	0	0	0	0	0	0	0	0	0	0	0	0
Japan	0	0	0	0	0	0	0	0	0	0	0	0	0	0	0	0	0	0	0	0	0	0	0	0	0	0	0	0	0	0	0	0	0	0	0	0	0	0	0	0	0
Jordan	0	0	0	0	0	0	0	0	0	0	0	0	0	0	0	0	0	0	0	0	0	0	0	0	0	0	0	0	0	0	0	0	0	0	0	0	0	0	0	0	0
Kazakhstan	0	0	0	0	0	0	0	0	0	0	0	0	0	0	0	0	0	0	0	0	0	0	0	0	0	0	0	0	0	0	0	0	0	0	0	0	0	0	0	0	0
Kenya	0	0	0	0	0	0	0	0	0	0	0	0	0	0	0	0	0	0	0	0	0	0	0	0	0	0	0	0	0	0	0	0	0	0	0	0	0	0	0	0	0
Kiribati	0	0	0	0	0	0	0	0	0	0	0	0	0	0	0	0	0	0	0	0	0	0	0	0	0	0	0	0	0	0	0	0	0	0	0	0	0	0	0	0	0
Kuwait	0	0	0	0	0	0	0	0	0	0	0	0	0	0	0	0	0	0	0	0	0	0	0	0	0	0	0	0	0	0	0	0	0	0	0	0	0	0	0	0	0
Kyrgyzstan	0	0	0	0	0	0	0	0	0	0	0	0	0	0	0	0	0	0	0	0	0	0	0	0	0	0	0	0	0	0	0	0	0	0	0	0	0	0	0	0	0
Laos	0	0	0	0	0	0	0	0	0	0	0	0	0	0	0	0	0	0	0	0	0	0	0	0	0	0	0	0	0	0	0	0	0	0	0	0	0	0	0	0	0
Latvia	0	0	0	0	0	0	0	0	0	0	0	0	0	0	0	0	0	0	0	0	0	0	0	0	0	0	0	0	0	0	0	0	0	0	0	0	0	0	0	0	0
Lebanon	0	0	0	0	0	0	0	0	0	0	0	0	0	0	0	0	0	0	0	0	0	0	0	0	0	0	0	0	0	0	0	0	0	0	0	0	0	0	0	0	0
Lesotho	0	0	0	0	0	0	0	0	0	0	0	0	0	0	0	0	0	0	0	0	0	0	0	0	0	0	0	0	0	0	0	0	0	0	0	0	0	0	0	0	0
Liberia	45895.2	45230	44634.5	44384.8	44803.6	46026.5	48652.9	52319.6	56469.4	60437	63823.3	65961.6	67428.7	68601.3	69958.6	71791.8	74322.9	77389	80751.6	84113.3	87291	90146.9	92782.4	95303.4	97846.3	100498	103259	106115	109053	112052	115093	118163	121310	124526	127799	131119	134482	137915	141412	144968	148579
Libya	0	0	0	0	0	0	0	0	0	0	0	0	0	0	0	0	0	0	0	0	0	0	0	0	0	0	0	0	0	0	0	0	0	0	0	0	0	0	0	0	0
Lithuania	0	0	0	0	0	0	0	0	0	0	0	0	0	0	0	0	0	0	0	0	0	0	0	0	0	0	0	0	0	0	0	0	0	0	0	0	0	0	0	0	0
Luxembourg	0	0	0	0	0	0	0	0	0	0	0	0	0	0	0	0	0	0	0	0	0	0	0	0	0	0	0	0	0	0	0	0	0	0	0	0	0	0	0	0	0
Macedonia	0	0	0	0	0	0	0	0	0	0	0	0	0	0	0	0	0	0	0	0	0	0	0	0	0	0	0	0	0	0	0	0	0	0	0	0	0	0	0	0	0
Madagascar	0	0	0	0	0	0	0	0	0	0	0	0	0	0	0	0	0	0	0	0	0	0	0	0	0	0	0	0	0	0	0	0	0	0	0	0	0	0	0	0	0
Malawi	20622.4	21035.6	21225.8	21301	21402.4	21620	21951.3	22455.9	23075.6	23732.8	24376.5	25013.8	25655.1	26312.2	26999.9	27724.3	28502.5	29302.2	30131.4	31007.3	31939.1	32839.8	33865.3	34978.6	36121.7	37258.7	38472.9	39636.8	40781.4	41961.1	43204.2	44414.3	45718.1	47097	48514.2	49948.1	51406.6	52896.2	54416.7	55976.8	57579.7
Malaysia	0	0	0	0	0	0	0	0	0	0	0	0	0	0	0	0	0	0	0	0	0	0	0	0	0	0	0	0	0	0	0	0	0	0	0	0	0	0	0	0	0
Maldives	0	0	0	0	0	0	0	0	0	0	0	0	0	0	0	0	0	0	0	0	0	0	0	0	0	0	0	0	0	0	0	0	0	0	0	0	0	0	0	0	0
Mali	16101.9	16414.9	16784.6	17193.7	17620	18045.1	18449.5	18878.7	19332.5	19813.1	20318.6	20838	21413.5	22034.2	22686.8	23358.7	24038.4	24765.6	25527.9	26311.7	27104.9	27876.1	28682.3	29525.7	30411.1	31338.1	32296.9	33333.9	34434.6	35579.9	36753	37944.9	39189.5	40482	41819.9	43198	44591.4	46056.7	47583.7	49158.9	50769.7
Malta	0	0	0	0	0	0	0	0	0	0	0	0	0	0	0	0	0	0	0	0	0	0	0	0	0	0	0	0	0	0	0	0	0	0	0	0	0	0	0	0	0
Mauritania	0	0	0	0	0	0	0	0	0	0	0	0	0	0	0	0	0	0	0	0	0	0	0	0	0	0	0	0	0	0	0	0	0	0	0	0	0	0	0	0	0
Mauritius	0	0	0	0	0	0	0	0	0	0	0	0	0	0	0	0	0	0	0	0	0	0	0	0	0	0	0	0	0	0	0	0	0	0	0	0	0	0	0	0	0
Mexico	0	0	0	0	0	0	0	0	0	0	0	0	0	0	0	0	0	0	0	0	0	0	0	0	0	0	0	0	0	0	0	0	0	0	0	0	0	0	0	0	0
Moldova	0	0	0	0	0	0	0	0	0	0	0	0	0	0	0	0	0	0	0	0	0	0	0	0	0	0	0	0	0	0	0	0	0	0	0	0	0	0	0	0	0
Mongolia	0	0	0	0	0	0	0	0	0	0	0	0	0	0	0	0	0	0	0	0	0	0	0	0	0	0	0	0	0	0	0	0	0	0	0	0	0	0	0	0	0
Montenegro	0	0	0	0	0	0	0	0	0	0	0	0	0	0	0	0	0	0	0	0	0	0	0	0	0	0	0	0	0	0	0	0	0	0	0	0	0	0	0	0	0
Morocco	0	0	0	0	0	0	0	0	0	0	0	0	0	0	0	0	0	0	0	0	0	0	0	0	0	0	0	0	0	0	0	0	0	0	0	0	0	0	0	0	0
Mozambique	0	0	0	0	0	0	0	0	0	0	0	0	0	0	0	0	0	0	0	0	0	0	0	0	0	0	0	0	0	0	0	0	0	0	0	0	0	0	0	0	0
Myanmar	0	0	0	0	0	0	0	0	0	0	0	0	0	0	0	0	0	0	0	0	0	0	0	0	0	0	0	0	0	0	0	0	0	0	0	0	0	0	0	0	0
Namibia	0	0	0	0	0	0	0	0	0	0	0	0	0	0	0	0	0	0	0	0	0	0	0	0	0	0	0	0	0	0	0	0	0	0	0	0	0	0	0	0	0
Nepal	0	0	0	0	0	0	0	0	0	0	0	0	0	0	0	0	0	0	0	0	0	0	0	0	0	0	0	0	0	0	0	0	0	0	0	0	0	0	0	0	0
Netherlands	0	0	0	0	0	0	0	0	0	0	0	0	0	0	0	0	0	0	0	0	0	0	0	0	0	0	0	0	0	0	0	0	0	0	0	0	0	0	0	0	0
New Zealand	0	0	0	0	0	0	0	0	0	0	0	0	0	0	0	0	0	0	0	0	0	0	0	0	0	0	0	0	0	0	0	0	0	0	0	0	0	0	0	0	0
Nicaragua	0	0	0	0	0	0	0	0	0	0	0	0	0	0	0	0	0	0	0	0	0	0	0	0	0	0	0	0	0	0	0	0	0	0	0	0	0	0	0	0	0
Niger	2368.95	2440.8	2518.36	2600.5	2686.18	2773.94	2858.22	2951.01	3050.78	3155.84	3264.25	3370.27	3487.64	3613.98	3746.54	3882.8	4021.41	4168.56	4323.23	4484.65	4651.94	4823.64	5004.85	5195.22	5394.52	5602.09	5813.74	6040.17	6279.78	6530.34	6789.82	7057.14	7338.1	7632	7938.5	8256.9	8583.9	8928.18	9288.45	9663.03	10050.3
Nigeria	550760	565311	580395	595929	611809	627889	643588	659927	676783	694005	711424	728408	746239	764798	783984	803674	823854	845222	867586	890732	914481	939211	964862	991403	1.0189e+06	1.04734e+06	1.07636e+06	1.10707e+06	1.13916e+06	1.17215e+06	1.20574e+06	1.24076e+06	1.27642e+06	1.31278e+06	1.35009e+06	1.38839e+06	1.42761e+06	1.4682e+06	1.51004e+06	1.5529e+06	1.59662e+06
North Korea	0	0	0	0	0	0	0	0	0	0	0	0	0	0	0	0	0	0	0	0	0	0	0	0	0	0	0	0	0	0	0	0	0	0	0	0	0	0	0	0	0
Norway	0	0	0	0	0	0	0	0	0	0	0	0	0	0	0	0	0	0	0	0	0	0	0	0	0	0	0	0	0	0	0	0	0	0	0	0	0	0	0	0	0
Oman	0	0	0	0	0	0	0	0	0	0	0	0	0	0	0	0	0	0	0	0	0	0	0	0	0	0	0	0	0	0	0	0	0	0	0	0	0	0	0	0	0
Pakistan	0	0	0	0	0	0	0	0	0	0	0	0	0	0	0	0	0	0	0	0	0	0	0	0	0	0	0	0	0	0	0	0	0	0	0	0	0	0	0	0	0
Palestine	0	0	0	0	0	0	0	0	0	0	0	0	0	0	0	0	0	0	0	0	0	0	0	0	0	0	0	0	0	0	0	0	0	0	0	0	0	0	0	0	0
Panama	0	0	0	0	0	0	0	0	0	0	0	0	0	0	0	0	0	0	0	0	0	0	0	0	0	0	0	0	0	0	0	0	0	0	0	0	0	0	0	0	0
Papua New Guinea	0	0	0	0	0	0	0	0	0	0	0	0	0	0	0	0	0	0	0	0	0	0	0	0	0	0	0	0	0	0	0	0	0	0	0	0	0	0	0	0	0
Paraguay	0	0	0	0	0	0	0	0	0	0	0	0	0	0	0	0	0	0	0	0	0	0	0	0	0	0	0	0	0	0	0	0	0	0	0	0	0	0	0	0	0
Peru	0	0	0	0	0	0	0	0	0	0	0	0	0	0	0	0	0	0	0	0	0	0	0	0	0	0	0	0	0	0	0	0	0	0	0	0	0	0	0	0	0
Philippines	0	0	0	0	0	0	0	0	0	0	0	0	0	0	0	0	0	0	0	0	0	0	0	0	0	0	0	0	0	0	0	0	0	0	0	0	0	0	0	0	0
Poland	0	0	0	0	0	0	0	0	0	0	0	0	0	0	0	0	0	0	0	0	0	0	0	0	0	0	0	0	0	0	0	0	0	0	0	0	0	0	0	0	0
Portugal	0	0	0	0	0	0	0	0	0	0	0	0	0	0	0	0	0	0	0	0	0	0	0	0	0	0	0	0	0	0	0	0	0	0	0	0	0	0	0	0	0
Qatar	0	0	0	0	0	0	0	0	0	0	0	0	0	0	0	0	0	0	0	0	0	0	0	0	0	0	0	0	0	0	0	0	0	0	0	0	0	0	0	0	0
Romania	0	0	0	0	0	0	0	0	0	0	0	0	0	0	0	0	0	0	0	0	0	0	0	0	0	0	0	0	0	0	0	0	0	0	0	0	0	0	0	0	0
Russia	0	0	0	0	0	0	0	0	0	0	0	0	0	0	0	0	0	0	0	0	0	0	0	0	0	0	0	0	0	0	0	0	0	0	0	0	0	0	0	0	0
Rwanda	0	0	0	0	0	0	0	0	0	0	0	0	0	0	0	0	0	0	0	0	0	0	0	0	0	0	0	0	0	0	0	0	0	0	0	0	0	0	0	0	0
Saint Lucia	0	0	0	0	0	0	0	0	0	0	0	0	0	0	0	0	0	0	0	0	0	0	0	0	0	0	0	0	0	0	0	0	0	0	0	0	0	0	0	0	0
Saint Vincent and the Grenadines	0	0	0	0	0	0	0	0	0	0	0	0	0	0	0	0	0	0	0	0	0	0	0	0	0	0	0	0	0	0	0	0	0	0	0	0	0	0	0	0	0
Samoa	0	0	0	0	0	0	0	0	0	0	0	0	0	0	0	0	0	0	0	0	0	0	0	0	0	0	0	0	0	0	0	0	0	0	0	0	0	0	0	0	0
São Tomé and Príncipe	0	0	0	0	0	0	0	0	0	0	0	0	0	0	0	0	0	0	0	0	0	0	0	0	0	0	0	0	0	0	0	0	0	0	0	0	0	0	0	0	0
Saudi Arabia	0	0	0	0	0	0	0	0	0	0	0	0	0	0	0	0	0	0	0	0	0	0	0	0	0	0	0	0	0	0	0	0	0	0	0	0	0	0	0	0	0
Senegal	498.374	514.466	531.596	549.451	567.64	585.898	603.256	620.993	639.201	657.975	677.295	696.597	716.753	737.728	759.483	781.915	803.905	827.268	851.788	877.183	903.271	929.996	957.489	985.806	1015.16	1045.64	1075.86	1107.9	1141.38	1175.7	1210.48	1246.13	1281.84	1317.85	1354.61	1392.31	1429.67	1468.17	1507.67	1547.88	1588.61
Serbia	0	0	0	0	0	0	0	0	0	0	0	0	0	0	0	0	0	0	0	0	0	0	0	0	0	0	0	0	0	0	0	0	0	0	0	0	0	0	0	0	0
Seychelles	0	0	0	0	0	0	0	0	0	0	0	0	0	0	0	0	0	0	0	0	0	0	0	0	0	0	0	0	0	0	0	0	0	0	0	0	0	0	0	0	0
Sierra Leone	42685.1	42823.8	42678.3	42386.8	42111	41951.8	41914.7	42072.4	42491.9	43248.6	44359.3	45973.9	48096.2	50489.9	52874.4	55073.1	56827.8	58372	59781.1	61160.8	62577.2	63968.5	65367	66782.8	68226.5	69698.1	71091.5	72565.9	74100	75660.3	77221.7	78707.9	80232.9	81788.7	83371	84971.1	86503.3	88083.9	89702	91345.4	93001.5
Singapore	0	0	0	0	0	0	0	0	0	0	0	0	0	0	0	0	0	0	0	0	0	0	0	0	0	0	0	0	0	0	0	0	0	0	0	0	0	0	0	0	0
Slovakia	0	0	0	0	0	0	0	0	0	0	0	0	0	0	0	0	0	0	0	0	0	0	0	0	0	0	0	0	0	0	0	0	0	0	0	0	0	0	0	0	0
Slovenia	0	0	0	0	0	0	0	0	0	0	0	0	0	0	0	0	0	0	0	0	0	0	0	0	0	0	0	0	0	0	0	0	0	0	0	0	0	0	0	0	0
Solomon Islands	0	0	0	0	0	0	0	0	0	0	0	0	0	0	0	0	0	0	0	0	0	0	0	0	0	0	0	0	0	0	0	0	0	0	0	0	0	0	0	0	0
Somalia	0	0	0	0	0	0	0	0	0	0	0	0	0	0	0	0	0	0	0	0	0	0	0	0	0	0	0	0	0	0	0	0	0	0	0	0	0	0	0	0	0
South Africa	0	0	0	0	0	0	0	0	0	0	0	0	0	0	0	0	0	0	0	0	0	0	0	0	0	0	0	0	0	0	0	0	0	0	0	0	0	0	0	0	0
South Korea	0	0	0	0	0	0	0	0	0	0	0	0	0	0	0	0	0	0	0	0	0	0	0	0	0	0	0	0	0	0	0	0	0	0	0	0	0	0	0	0	0
Spain	0	0	0	0	0	0	0	0	0	0	0	0	0	0	0	0	0	0	0	0	0	0	0	0	0	0	0	0	0	0	0	0	0	0	0	0	0	0	0	0	0
Sri Lanka	0	0	0	0	0	0	0	0	0	0	0	0	0	0	0	0	0	0	0	0	0	0	0	0	0	0	0	0	0	0	0	0	0	0	0	0	0	0	0	0	0
Sudan	182511	187990	193923	200180	206610	213103	219242	225636	232294	239216	246391	253728	261419	269459	277875	286653	295484	304888	314718	324772	334914	344996	355151	365438	375960	386761	397521	408634	420052	431696	443505	455193	467149	479341	491745	504330	516814	529553	542530	555727	569120
Suriname	0	0	0	0	0	0	0	0	0	0	0	0	0	0	0	0	0	0	0	0	0	0	0	0	0	0	0	0	0	0	0	0	0	0	0	0	0	0	0	0	0
Swaziland	0	0	0	0	0	0	0	0	0	0	0	0	0	0	0	0	0	0	0	0	0	0	0	0	0	0	0	0	0	0	0	0	0	0	0	0	0	0	0	0	0
Sweden	0	0	0	0	0	0	0	0	0	0	0	0	0	0	0	0	0	0	0	0	0	0	0	0	0	0	0	0	0	0	0	0	0	0	0	0	0	0	0	0	0
Switzerland	0	0	0	0	0	0	0	0	0	0	0	0	0	0	0	0	0	0	0	0	0	0	0	0	0	0	0	0	0	0	0	0	0	0	0	0	0	0	0	0	0
Syria	0	0	0	0	0	0	0	0	0	0	0	0	0	0	0	0	0	0	0	0	0	0	0	0	0	0	0	0	0	0	0	0	0	0	0	0	0	0	0	0	0
Tajikistan	0	0	0	0	0	0	0	0	0	0	0	0	0	0	0	0	0	0	0	0	0	0	0	0	0	0	0	0	0	0	0	0	0	0	0	0	0	0	0	0	0
Tanzania	61135	63172.4	65389.6	67708	70029.1	72289.1	74323.5	76307.7	78276.2	80272.9	82321.5	84357	86472	88679.7	90992.5	93413.2	95913.1	98592.1	101440	104450	107615	110898	114432	118165	122028	125978	130056	134192	138409	142744	147217	151749	156426	161247	166200	171274	176436	181749	187209	192812	198553
Thailand	0	0	0	0	0	0	0	0	0	0	0	0	0	0	0	0	0	0	0	0	0	0	0	0	0	0	0	0	0	0	0	0	0	0	0	0	0	0	0	0	0
The Bahamas	0	0	0	0	0	0	0	0	0	0	0	0	0	0	0	0	0	0	0	0	0	0	0	0	0	0	0	0	0	0	0	0	0	0	0	0	0	0	0	0	0
The Gambia	0	0	0	0	0	0	0	0	0	0	0	0	0	0	0	0	0	0	0	0	0	0	0	0	0	0	0	0	0	0	0	0	0	0	0	0	0	0	0	0	0
Timor-Leste	0	0	0	0	0	0	0	0	0	0	0	0	0	0	0	0	0	0	0	0	0	0	0	0	0	0	0	0	0	0	0	0	0	0	0	0	0	0	0	0	0
Togo	10141.7	10440.5	10751.1	11071.3	11398.2	11729.3	12064.4	12406.6	12755.6	13111.7	13474.1	13840.9	14217.4	14603.2	14998.1	15401.5	15804.7	16226.7	16664.8	17115	17574.3	18047	18532.6	19030.2	19541.9	20068	20595.9	21150.4	21725	22310.2	22900	23511.1	24121.7	24735.4	25358.6	25994.2	26633.9	27289.9	27960.1	28639.8	29325.9
Tonga	0	0	0	0	0	0	0	0	0	0	0	0	0	0	0	0	0	0	0	0	0	0	0	0	0	0	0	0	0	0	0	0	0	0	0	0	0	0	0	0	0
Trinidad and Tobago	0	0	0	0	0	0	0	0	0	0	0	0	0	0	0	0	0	0	0	0	0	0	0	0	0	0	0	0	0	0	0	0	0	0	0	0	0	0	0	0	0
Tunisia	0	0	0	0	0	0	0	0	0	0	0	0	0	0	0	0	0	0	0	0	0	0	0	0	0	0	0	0	0	0	0	0	0	0	0	0	0	0	0	0	0
Turkey	0	0	0	0	0	0	0	0	0	0	0	0	0	0	0	0	0	0	0	0	0	0	0	0	0	0	0	0	0	0	0	0	0	0	0	0	0	0	0	0	0
Turkmenistan	0	0	0	0	0	0	0	0	0	0	0	0	0	0	0	0	0	0	0	0	0	0	0	0	0	0	0	0	0	0	0	0	0	0	0	0	0	0	0	0	0
Uganda	46219.8	47719	49267.3	50859	52492.6	54165.4	55745	57413.6	59174.3	61025.1	62959.3	64987.7	67130.1	69379.5	71734.6	74190.3	76694.2	79350.9	82150.7	85078.3	88121	91288.7	94604.8	98057.7	101637	105330	109088	112986	117018	121179	125461	129822	134330	138981	143767	148680	153679	158828	164121	169552	175116
Ukraine	0	0	0	0	0	0	0	0	0	0	0	0	0	0	0	0	0	0	0	0	0	0	0	0	0	0	0	0	0	0	0	0	0	0	0	0	0	0	0	0	0
United Arab Emirates	0	0	0	0	0	0	0	0	0	0	0	0	0	0	0	0	0	0	0	0	0	0	0	0	0	0	0	0	0	0	0	0	0	0	0	0	0	0	0	0	0
United Kingdom	0	0	0	0	0	0	0	0	0	0	0	0	0	0	0	0	0	0	0	0	0	0	0	0	0	0	0	0	0	0	0	0	0	0	0	0	0	0	0	0	0
United States	0	0	0	0	0	0	0	0	0	0	0	0	0	0	0	0	0	0	0	0	0	0	0	0	0	0	0	0	0	0	0	0	0	0	0	0	0	0	0	0	0
Uruguay	0	0	0	0	0	0	0	0	0	0	0	0	0	0	0	0	0	0	0	0	0	0	0	0	0	0	0	0	0	0	0	0	0	0	0	0	0	0	0	0	0
Uzbekistan	0	0	0	0	0	0	0	0	0	0	0	0	0	0	0	0	0	0	0	0	0	0	0	0	0	0	0	0	0	0	0	0	0	0	0	0	0	0	0	0	0
Vanuatu	0	0	0	0	0	0	0	0	0	0	0	0	0	0	0	0	0	0	0	0	0	0	0	0	0	0	0	0	0	0	0	0	0	0	0	0	0	0	0	0	0
Venezuela	0	0	0	0	0	0	0	0	0	0	0	0	0	0	0	0	0	0	0	0	0	0	0	0	0	0	0	0	0	0	0	0	0	0	0	0	0	0	0	0	0
Vietnam	0	0	0	0	0	0	0	0	0	0	0	0	0	0	0	0	0	0	0	0	0	0	0	0	0	0	0	0	0	0	0	0	0	0	0	0	0	0	0	0	0
Yemen	0	0	0	0	0	0	0	0	0	0	0	0	0	0	0	0	0	0	0	0	0	0	0	0	0	0	0	0	0	0	0	0	0	0	0	0	0	0	0	0	0
Zambia	0	0	0	0	0	0	0	0	0	0	0	0	0	0	0	0	0	0	0	0	0	0	0	0	0	0	0	0	0	0	0	0	0	0	0	0	0	0	0	0	0
Zimbabwe	0	0	0	0	0	0	0	0	0	0	0	0	0	0	0	0	0	0	0	0	0	0	0	0	0	0	0	0	0	0	0	0	0	0	0	0	0	0	0	0	0

## Sheet: GDP
GDP per capita PPP (constant 2005)																						(year used from WDI data)	Income share held by					GDP per quintile						Prevalence per Quintile						Weighted Income		Employement to pop rate, 15, total		Income corrected for unemployment
MEN	1990	1991	1992	1993	1994	1995	1996	1997	1998	1999	2000	2001	2002	2003	2004	2005	2006	2007	2008	2009	2010		Q1	Q2	Q3	Q4	Q5	Q1	Q2	Q3	Q4	Q5		Q1	Q2	Q3	Q4	Q5		Q1-Q5
Afghanistan													760.825	792.472	770.744	827.849	847.564	937.753	947.071	1118.19	1183.05		0.094	0.136	0.174	0.221	0.375	556.031	804.471	1029.25	1307.26	2218.21		1	0	0	0	0		556.031		0.44	Afghanistan	244.654
Albania	3731.69	2617.74	2438.36	2695.57	2947.69	3366.1	3690.9	3324.1	3752.87	4141.26	4461.05	4800.72	4973.98	5296.79	5649.74	5997.9	6330.59	6732.37	7272.84	7525.78	7791.76							0	0	0	0	0		1	0	0	0	0		0		0.473	Albania	0
Algeria	5861.82	5650.65	5618.35	5378.78	5220.04	5314.39	5434.08	5403.29	5591.34	5686.16	5730.07	5914.06	6164.18	6521.82	6709.17	7000.5	7006.79	7123.26	7137.94	7128.01	7249.23		0.0697	0.116	0.162	0.226	0.426	2526.36	4204.55	5871.88	8191.63	15440.9		1	0	0	0	0		2526.36		0.388	Algeria	980.226
Angola	3031.31	2905.28	2618.77	1907.88	1912.22	2048.05	2213.96	2325.47	2418.27	2427.68	2426.4	2447.89	2692.41	2735.48	2927.6	3343.43	3900.41	4622.25	5088.1	5042.32	5048.11		0.054	0.096	0.145	0.218	0.486	1362.99	2423.09	3659.88	5502.44	12266.9		1	0	0	0	0		1362.99		0.644	Angola	877.766
Antigua and Barbuda	14733.4	14911.5	14795.7	15248.5	15803.6	14744.9	15313.9	15620.2	15874.9	16130.3	16602.1	15814.4	16057.1	16929.5	17584.2	18468.1	20741.7	22488.2	22244	19293.5	17610.2		0.0523	0.0987	0.1481	0.2175	0.4834	4605.07	8690.64	13040.4	19151.1	42563.9		1	0	0	0	0		4605.07			Antigua and Barbuda	0
Argentina	7462.31	8293.29	9160.16	9575.23	10005.2	9599.47	10006.2	10688.5	10971.4	10482.3	10290.1	9738.71	8596.05	9271.2	10019.1	10842.7	11657.8				11657.8		0.0438	0.0931	0.1478	0.2217	0.4936	2553.06	5426.71	8615.13	12922.7	28771.5		1	0	0	0	0		2553.06		0.558	Argentina	1424.61
Armenia	2937.89	2618.38	1551.47	1448.46	1563.67	1706.19	1834.58	1917.12	2073.39	2155.06	2295.36	2527.98	2873.49	3288.8	3645.53	4165.79	4734.44	5408.85	7467.32	6430.85	6582.66		0.0882	0.1279	0.1651	0.2141	0.4047	2902.95	4209.61	5433.99	7046.74	13320		1	0	0	0	0		2902.95		0.499	Armenia	1448.57
Australia	23865.2	23480.2	23296.4	24017.9	24727.2	25404.9	26074.7	26790.3	27712	28754.6	29506.6	29664.4	30451.2	31025.5	31939.8	32525.6	33024.4	33756.8	34425.4	34359.1	34620.9							0	0	0	0	0		1	0	0	0	0		0		0.621	Australia	0
Austria	25437.5	26051.5	26305.8	26227.2	26754	27425.8	28064.4	28679.9	29732.9	30725.4	31775.7	31925.7	32307.1	32428.5	33062.5	33626.4	34688.3	35834.6	36191.7	34690.5	35201.2							0	0	0	0	0		1	0	0	0	0		0		0.579	Austria	0
Azerbaijan	4753.93	4647.93	3543.41	2683.8	2126.15	1853.79	1859.03	1947.97	2122.52	2259.67	2489.95	2715.34	2980.84	3289.68	3593.63	4496.14	5981.24	7395.16	8021.57	8596.12	8906.8		0.0799	0.1209	0.1616	0.2168	0.4208	3558.27	5384.16	7196.69	9654.97	18739.9		1	0	0	0	0		3558.27		0.609	Azerbaijan	2166.98
Bahrain	17799.3	19266	20039.5	22071.4	21476.7	21744.2	22014.4	22022.7	22325.1	22435.8	22658.8	22666.2	22757.9	23147.7	23000.7	23130.7	22826.9	22780.7	22400	21631.1	21487.7	2005	0.0643	0.1091	0.1554	0.2196	0.4516	6908.3	11721.5	16696	23593.5	48519.3		1	0	0	0	0		6908.3		0.653	Bahrain	4511.12
Bangladesh	732.371	739.281	759.293	776.98	791.684	813.35	833.345	860.357	887.342	912.733	949.339	982.003	1008.32	1044.7	1094.1	1143.87	1205.11	1268.66	1333.42	1395.52	1464.32		0.0888	0.124	0.161	0.213	0.414	650.159	907.88	1178.78	1559.5	3031.15		1	0	0	0	0		650.159		0.675	Bangladesh	438.858
Barbados	19756.5	19119.3	18112.6	18239.1	18911.6	19140.6	19438.5	20625.1	21411.5	21896.4	22318.7	21659.9	21706.2	22026.7	22230.6	23004	24196.8	24480.6	24444.5	23317.4	23260.6							0	0	0	0	0		1	0	0	0	0		0		0.635	Barbados	0
Belarus	6434.06	6353.73	5731.41	5283.92	4671.18	4198.92	4330.94	4845.17	5277.2	5475.12	5810.04	6131.78	6482.28	6987	7840.61	8640.33	9562.58	10437.3	11545.6	11590	12504.8							0	0	0	0	0		1	0	0	0	0		0		0.495	Belarus	0
Belgium	25096.5	25461.7	25746.8	25399.7	26138.7	26706	27033.6	27975.5	28454.3	29394.2	30399	30539.3	30816.1	30934.9	31809.9	32189.4	32830.4	33529.9	33593.8	32391.3	32842.4							0	0	0	0	0		1	0	0	0	0		0		0.494	Belgium	0
Belize	4208.51	4557.54	5013.7	5233.7	5140.21	5057.98	4999.48	5031.98	5067.18	5350.98	5878.16	6006.53	6149.26	6551.71	6683.07	6707.53	6844.78	6753.07	6837.44	6687.53	6776.44	1999	0.0327	0.0859	0.1124	0.1938	0.5752	1107.95	2910.48	3808.36	6566.37	19489		1	0	0	0	0		1107.95		0.599	Belize	663.661
Benin	1100.03	1106.41	1097.69	1119.25	1101.54	1129.32	1141.79	1172.16	1184.12	1211.46	1232.18	1268.02	1281.25	1287.42	1284.51	1279.39	1286.32	1305.05	1329.95	1325.89	1321.27		0.07	0.108	0.15	0.21	0.461	462.445	713.487	990.954	1387.33	3045.53		1	0	0	0	0		462.445		0.72	Benin	332.96
Bhutan	1801.94	1797.39	1903.57	1975.97	2104.09	2263.92	2373.65	2460.16	2544.18	2672.88	2778.42	2920.77	3139.17	3281.46	3378.96	3527.67	3683.49	4255.57	4371.95	4584.08	5030.86	2007	0.0664	0.1079	0.1538	0.2204	0.4515	1670.25	2714.15	3868.73	5544.01	11357.2		1	0	0	0	0		1670.25		0.691	Bhutan	1154.14
Bolivia	3012.78	3097.28	3074.66	3131.44	3202.49	3276.97	3344.73	3434.94	3531.7	3473.39	3488.05	3475.67	3491.86	3517.55	3596.22	3688.15	3799	3907.1	4080.85	4150.6	4252.44	2008	0.0213	0.068	0.1191	0.1985	0.5931	452.885	1445.83	2532.33	4220.55	12610.6		1	0	0	0	0		452.885		0.698	Bolivia	316.114
Bosnia and Herzegovina					1254.47	1574.97	3006.28	3982.51	4471.24	4755.26	4909.04	5065.6	5309.14	5524.05	5874.68	6179.37	6570.4	7031.47	7426.9	7225.29	7290.09							0	0	0	0	0		1	0	0	0	0		0		0.329	Bosnia and Herzegovina	0
Botswana	7875.45	8221.65	8227.23	8160.78	8240.28	8604.67	8895.44	9398.62	9271.8	9974.92	9996.71	9864.56	10315.1	10653.1	10810.8	11176.4	11937.8	12844	13217.2	12068.5	12988.4		0.0313	0.0581	0.0964	0.164	0.65	2032.68	3773.13	6260.4	10650.5	42212.3		1	0	0	0	0		2032.68		0.629	Botswana	1278.56
Brazil	7174.98	7163.55	7017.37	7231.85	7501.92	7714.33	7760.28	7900.45	7784.48	7689.4	7905.65	7898.11	7998.26	7984.97	8337.67	8502.32	8745.05	9187.14	9572.94	9456.43	10079.3		0.0285	0.0713	0.124	0.19	0.586	1436.3	3593.27	6249.16	9575.32	29532.3		1	0	0	0	0		1436.3		0.645	Brazil	926.412
Brunei	49451	49578.2	50485.3	49241.6	49426.4	50303.9	50467.4	48538.7	47155.3	47503.3	47782	48034.4	48843.9	49233.1	48501.1	47760	48944.6	48153.7	46419.6	44862.2	45319.3							0	0	0	0	0		1	0	0	0	0		0		0.625	Brunei Darussalam	0
Bulgaria	7524.17	6957.3	6520.98	6475.91	6616.07	6835.68	6250.57	6185.26	6529.37	6695.05	7111.7	7548.89	8056.18	8548.06	9170.47	9809.4	10502.5	11231.9	11985.2	11383.1	11505.8							0	0	0	0	0		1	0	0	0	0		0		0.479	Bulgaria	0
Burkina Faso	709.495	753.405	735.094	740.208	729.765	750.585	810.551	838.124	874.537	913.138	903.885	936.14	956.251	1001.33	1016.06	1072.18	1111.59	1118.28	1148.87	1148.82	1204.5		0.0672	0.1058	0.1479	0.2087	0.4704	404.713	637.182	890.73	1256.9	2832.99		1	0	0	0	0		404.713		0.808	Burkina Faso	327.008
Burundi	688.563	704.876	695.909	639.331	603.907	547.349	496.796	483.133	499.952	487.523	474.002	472.07	479.164	458.536	464.928	453.439	461.683	467.18	473.922	473.748	475.384		0.09	0.119	0.154	0.21	0.428	213.923	282.854	366.046	499.153	1017.32		1	0	0	0	0		213.923		0.758	Burundi	162.154
Cambodia				773.917	815.775	841.006	860.832	884.848	906.16	990.754	1054.48	1116.43	1168.91	1246.27	1352.66	1508.14	1646.1	1788.84	1882.09	1856.59	1937.07		0.0793	0.114	0.153	0.21	0.445	768.05	1104.13	1481.86	2033.93	4309.99		1	0	0	0	0		768.05		0.811	Cambodia	622.889
Cameroon	2100.8	1962.26	1846.98	1737.32	1646.66	1654.27	1689.99	1728.78	1768.01	1797.42	1824.22	1857.28	1882.06	1907.76	1927.83	1921.79	1933.17	1937.5	1956.82	1942.92	1957.22		0.067	0.105	0.149	0.217	0.462	655.668	1027.54	1458.13	2123.58	4521.18		1	0	0	0	0		655.668		0.672	Cameroon	440.609
Canada	26941.2	26021.1	25928.6	26246.1	27243.9	27778	27925.3	28799.4	29721	31106.7	32446.8	32693.9	33349.5	33640	34343.7	35033.4	35730.4	36126.7	35949.6	34529.7	35222.5							0	0	0	0	0		1	0	0	0	0		0		0.613	Canada	0
Cape Verde	1018.16	1010.4	1092.86	1155.98	1340.93	1493.27	1624.82	1767.55	1949.71	2127.39	2385.9	2393.77	2473.77	2534.04	2753.29	2912.41	3123.47	3584.13	3815.1	3891.66	4018.99	2002	0.0454	0.0791	0.1227	0.1938	0.559	912.312	1589.51	2465.65	3894.41	11233.1		1	0	0	0	0		912.312				0
Central African Republic	754.022	733.055	669.953	656.205	672.124	704.006	660.796	680.695	697.733	708.395	677.699	695.394	708.455	659.298	687.343	681.8	720.664	765.011	779.933	833.248	871.445		0.034	0.069	0.111	0.18	0.606	148.146	300.649	483.652	784.301	2640.48		1	0	0	0	0		148.146		0.727	Central African Republic	107.702
Chad	1037.62	1091.16	1141.97	932.626	994.761	974.628	963.635	984.415	1017.28	975.161	931.854	1001.9	1045.84	1154.54	1486.33	1683.11	1638.01	1638.21	1636.75	1654.68	1822.87		0.063	0.104	0.15	0.218	0.466	574.204	947.892	1367.15	1986.93	4247.28		1	0	0	0	0		574.204		0.661	Chad	379.549
Chile	6913.58	7330.04	8079.9	8488.39	8817.3	9595.37	10150.5	10668.1	10866.7	10647.6	10990.3	11224	11336.6	11655.4	12227.6	12773.4	13201.3	13745.7	14061.4	13784.2	14443.4	2009	0.0426	0.0794	0.1174	0.1836	0.577	3076.44	5734.02	8478.26	13259	41669.1		1	0	0	0	0		3076.44		0.554	Chile	1704.35
China	1100.66	1185.63	1337.5	1507.32	1685.62	1849.15	2012.86	2177.65	2325.09	2480.23	2667.47	2867.96	3108.05	3397.63	3718.64	4114.57	4611.3	5238.68	5712.25	6206.82	6819.32		0.0467	0.0974	0.153	0.232	0.471	1592.31	3321.01	5216.78	7910.41	16059.5		1	0	0	0	0		1592.31		0.678	China	1079.59
Colombia	6077.7	6097.05	6283.46	6313.11	6559.69	6776.71	6793.03	6902.73	6822.06	6424.31	6596.65	6598.07	6655.37	6807.84	7060.36	7280.29	7651.42	8058.64	8223.49	8240.76	8449.59	2010	0.03	0.0683	0.1123	0.1879	0.6015	1267.44	2885.53	4744.44	7938.39	25412.1		1	0	0	0	0		1267.44		0.593	Colombia	751.591
Comoros	1281.52	1183.2	1253.56	1260.59	1165.6	1178.56	1134.95	1151.57	1137.3	1130.15	1117.36	1125.45	1142.52	1141.11	1109.41	1126.8	1111.57	1088.41	1071	1062.88	1057.71	2004	0.0255	0.0535	0.0894	0.1514	0.6802	134.858	282.937	472.796	800.686	3597.27		1	0	0	0	0		134.858		0.533	Comoros	71.8793
Congo	3565.69	3556	3554.75	3429	3155.71	3193.65	3239.07	3128.52	3154.46	2989.14	3131.5	3170.03	3236.45	3185.45	3214.53	3371.94	3480.26	3322.95	3401.68	3547.15	3748.22		0.05	0.084	0.13	0.205	0.531	937.056	1574.25	2436.34	3841.93	9951.53		1	0	0	0	0		937.056		0.656	Congo, Rep.	614.709
Costa Rica	6222.09	6225.54	6632.25	6954.59	7109.09	7208.09	7091.74	7300.22	7717.98	8154.4	8115.65	8031.53	8102.41	8461.54	8665.75	9019.11	9649.33	10250	10368.5	10110	10455.7	2009	0.0385	0.08	0.1241	0.1987	0.5587	2012.73	4182.3	6487.79	10387.8	29208.1		1	0	0	0	0		2012.73		0.581	Costa Rica	1169.4
Côte d’Ivoire	1973.91	1909.43	1842.85	1780.95	1740.29	1809.41	1893.99	1947.76	1988.21	1973	1861.24	1828.11	1774.42	1722.56	1729.47	1726.06	1711.45	1713	1723.06	1754.87	1761.36		0.056	0.1007	0.149	0.218	0.4763	493.181	886.845	1312.21	1919.88	4194.68		1	0	0	0	0		493.181		0.646	Cote d'Ivoire	318.595
Croatia						9925.11	10922.1	11438.3	11848.4	11588.3	12370.7	12782.5	13406.1	14126.1	14712.6	15331.9	16095.8	16925.5	17286.1	16103.3	15917.3							0	0	0	0	0		1	0	0	0	0		0		0.46	Croatia	0
Cuba	3635.51	3221.25	2828.87	2393.82	2398.29	2445.26	2625.24	2687.7	2682.24	2838.64	2996.63	3081.73	3115.54	3223.94	3401.69	3776.47	4228.75	4535.62	4724.57	4796.23	4913.85		0.0481667	0.0882333	0.134367	0.207233	0.522	1183.42	2167.83	3301.29	5091.56	12825.1		1	0	0	0	0		1183.42		0.552	Cuba	653.247
Cyprus	18091.4	17759.5	18918.8	18596.7	19290.8	20099.8	20147.7	20330.6	21095.7	21872	22731.9	23393.5	23587	23630.3	24062	24408.1	24929.6	25826.6	26456.3	25789.9	25198							0	0	0	0	0		1	0	0	0	0		0		0.603	Cyprus	0
Czech Republic	16361	14495.4	14407.2	14401.2	14814.8	15746.2	16480.1	16357.3	16334.1	16625.4	17340.8	17940.4	18382.8	19070.5	19958	21264.4	22683.4	23833.5	24359.5	23122.2	23619.7							0	0	0	0	0		1	0	0	0	0		0		0.541	Czech Republic	0
Democratic Republic of the Congo	657.95	580.232	498.965	414.973	384.541	375.244	361.844	334.114	322.235	302.236	274.996	262.414	264.114	271.432	281.1	294.386	302.079	312.018	322.038	322.037	335.679		0.055	0.092	0.138	0.209	0.506	92.3119	154.413	231.619	350.785	849.269		1	0	0	0	0		92.3119		0.667	Congo, Dem. Rep.	61.572
Denmark	25442.2	25706.2	26127.5	26017.3	27362.3	28054.4	28686.8	29481.6	30009.4	30676.1	31652.5	31761.6	31807.8	31843.2	32490.4	33193.2	34207.4	34595.3	34123	32017.7	32378.6							0	0	0	0	0		1	0	0	0	0		0				0
Djibouti	2607.47	2403.59	2339.07	2141.58	2086.1	1979.35	1864.5	1818.3	1788.83	1797.68	1777.11	1786.7	1807.12	1838.65	1882.35	1914.98	1978.97	2050.87			2050.87		0.0603	0.105	0.152	0.218	0.465	618.339	1076.71	1558.66	2235.45	4768.28		1	0	0	0	0		618.339				0
Dominican Republic	3806.71	3766.1	4080.33	4290.95	4307.88	4462.74	4698.19	4989.48	5252.73	5516.5	5737.36	5750.96	5991.26	5886.45	5875.55	6326.36	6901.07	7380.22	7660.4	7817.5	8312		0.0467	0.0859	0.1315	0.2081	0.5278	1940.85	3570.01	5465.14	8648.64	21935.4		1	0	0	0	0		1940.85		0.568	Dominican Republic	1102.4
Ecuador	6264.86	6384.22	6373.09	6356.01	6483.59	6488.83	6463.34	6604.69	6682.71	6239.3	6183.57	6307.18	6440.02	6490.95	6894.51	7128.62	7311.78	7343.67	7679.19	7594.98	7691.75		0.0429	0.0823	0.1289	0.2071	0.5379	1649.88	3165.15	4957.33	7964.81	20687		1	0	0	0	0		1649.88		0.646	Ecuador	1065.82
Egypt	3266.44	3241.21	3327.85	3370.28	3450.43	3555.33	3675.3	3817.48	3910.19	4084.34	4235.99	4316.07	4347.31	4413.16	4518.34	4642.37	4877.65	5136.2	5411.73	5570.64	5759.76		0.0924	0.13	0.164	0.21	0.403	2661.01	3743.85	4723.01	6047.75	11605.9		1	0	0	0	0		2661.01		0.442	Egypt, Arab Rep.	1176.17
El Salvador	3664.11	3738.44	3957.82	4184.06	4374.36	4597.27	4628.39	4784.98	4930.84	5071.84	5154.95	5219.83	5321.56	5424.94	5506.21	5681.51	5880.37	6079.98	6128.6	5906.15	5953.33		0.0371	0.0883	0.137	0.2067	0.5309	1104.34	2628.4	4078.03	6152.77	15803.1		1	0	0	0	0		1104.34		0.575	El Salvador	634.997
Equatorial Guinea	1999.26	1912.26	2046.82	2103.27	2137.86	2363.57	2954.98	4898.65	5784.75	7927.7	8639.47	13681.8	15846.5	17513.1	23448.9	24981.8	20342.1	24096.2	27346.4	26805.5	25619.2		0.0595	0.0968333	0.141633	0.2104	0.491633	7621.72	12404	18142.7	26951.4	62976.3		1	0	0	0	0		7621.72		0.799	Equatorial Guinea	6089.75
Eritrea			430.155	486.177	585.62	594.957	637.768	671.399	663.184	641.073	598.239	624.879	616.604	574.603	558.831	550.953	526.002	515.606	450.271	452.938	448.1		0.069	0.115	0.16	0.22	0.436	154.595	257.658	358.48	492.91	976.859		1	0	0	0	0		154.595		0.777	Eritrea	120.12
Estonia						7938.07	8530.55	9641.1	10397	10448	11512.5	12284.2	13142.7	14216.5	15166.1	16548	18253.4	19648.4	18846.8	16194.6	16611.3							0	0	0	0	0		1	0	0	0	0		0		0.51	Estonia	0
Ethiopia	543.09	487.082	429.455	469.213	468.024	480.818	524.098	524.74	492.215	503.064	518.538	545.613	538.108	511.551	564.692	614.014	662.082	718.207	774.692	820.859	879.042		0.0926	0.1322	0.1678	0.2133	0.3941	406.997	581.047	737.516	937.499	1732.15		1	0	0	0	0		406.997		0.794	Ethiopia	323.155
Federated States of Micronesia	1969.01	2062.39	2089.81	2205.03	2149.4	2269.59	2183.01	2047.5	2113.28	2151.02	2257.09	2302.1	2319.96	2366.01	2294.74	2352.64	2360.17	2324.52	2278	2311.31	2378.12							0	0	0	0	0		1	0	0	0	0		0				0
Fiji	3433.89	3309.95	3468.78	3493	3619.65	3662.67	3794.16	3671.15	3683.95	3977.13	3886.45	3949.32	4068.03	4103.75	4311.9	4323.66	4374.1	4298.83	4299.69	4202.02	4167.19	2009	0.062	0.0987	0.1407	0.2027	0.4959	1291.83	2056.51	2931.62	4223.45	10332.6		1	0	0	0	0		1291.83		0.503	Fiji	649.79
Finland	23141	21634.1	20763.2	20495.4	21152.9	21907.3	22615	23947.1	25085.2	26005.2	27332.8	27893.5	28336.3	28837.7	29940.2	30707.9	31939.5	33500.8	33443	30441.5	31321.7							0	0	0	0	0		1	0	0	0	0		0		0.552	Finland	0
France	24211.7	24401.6	24639.3	24368.9	24823.9	25240.6	25419.9	25883.2	26659.2	27395.5	28209.9	28519.5	28576	28629.6	29142.9	29452.5	29969.5	30465.5	30271.4	29168.4	29521.7							0	0	0	0	0		1	0	0	0	0		0		0.509	France	0
Gabon	14665.4	15148.5	14294	14470.8	14620.1	14953.8	15101.4	15564.9	15704.3	13950	13356.6	13317.8	12972	12984.9	12853.9	12931.8	12774.9	13163.1	12976.8	12299.3	12810.8	2005	0.0616	0.1012	0.1454	0.21	0.4818	3945.72	6482.26	9313.44	13451.3	30861.2		1	0	0	0	0		3945.72		0.479	Gabon	1890
Georgia	6138.17	4809.07	2629.35	1844.72	1669.7	1759.29	2006.29	2258.68	2351.8	2438.19	2502.23	2641.55	2804.94	3135.34	3327.13	3610.49	3916.4	4409.47	4516.24	4319.02	4545.9	2010	0.0503	0.0994	0.151	0.2232	0.4761	1143.29	2259.31	3432.16	5073.23	10821.5		1	0	0	0	0		1143.29		0.535	Georgia	611.663
Germany	25881.1	27005.6	27313.5	26862.6	27431.3	27809.4	27948.3	28392.3	28916.5	29438.6	30297.6	30704.7	30656.3	30524.3	30885.4	31114.5	32302.2	33402.8	33828.9	32169.6	33511.7							0	0	0	0	0		1	0	0	0	0		0		0.551	Germany	0
Ghana	917.315	939.164	948.569	967.342	972.843	987.371	1008.26	1026.69	1051	1072.44	1086.09	1102.11	1123.01	1151.42	1184.75	1222.46	1267.29	1314.54	1389.32	1409.31	1486.31	2006	0.052	0.0984	0.1473	0.2164	0.4855	386.441	731.266	1094.67	1608.19	3608.02		1	0	0	0	0		386.441		0.664	Ghana	256.597
Greece	17325	17689	17617.7	17177.4	17375.7	17604.8	17894.1	18429.2	18946.5	19508.4	20316.7	21106.7	21757.9	22975.8	23896.5	24348.4	25587.7	26387.6	26227.3	25302	23998.7							0	0	0	0	0		1	0	0	0	0		0		0.472	Greece	0
Grenada	6283.88	6416.95	6348.83	6112.01	6210.74	6312.27	6533	6811.86	7244.81	7963.61	8148.58	7959.94	8230.07	8999.64	8882.26	10053.8	9636.64	10175.5	10246.2	9535.2	9496.55		0.0523	0.0987	0.1481	0.2175	0.4834	2483.35	4686.55	7032.19	10327.5	22953.2		1	0	0	0	0		2483.35			Grenada	0
Guatemala	3343.84	3386.82	3468.98	3522.14	3580.15	3671.71	3694.91	3769.43	3868.28	3925.01	3971.46	3966.81	4019.77	4020	4044.46	4073.83	4188.46	4344.66	4378.59	4294.43	4309.05		0.0308	0.0685	0.114	0.185	0.603	663.594	1475.85	2456.16	3985.87	12991.8		1	0	0	0	0		663.594		0.651	Guatemala	432
Guinea	854.307	830.862	809.305	802.253	792.149	794.484	803.522	824.608	838.413	855.833	862.689	879.248	909.284	904.751	908.644	916.655	918.195	911.27	931.44	904.404	897.945		0.064	0.105	0.151	0.219	0.462	287.342	471.421	677.949	983.25	2074.25		1	0	0	0	0		287.342		0.695	Guinea	199.703
Guinea-Bissau	1207.01	1240.13	1225.54	1223.08	1233.89	1259.45	1374.43	1431.58	1006.78	994.896	1008.63	1057.88	1055.43	981.402	952.892	978.201	938.258	973.685	1052.44	1040.9	1034.95	2002	0.0728	0.1164	0.1599	0.2188	0.4321	376.722	602.341	827.443	1132.24	2236.01		1	0	0	0	0		376.722		0.677	Guinea-Bissau	255.041
Guyana	1563.5	1661.15	1791.87	1936.35	2096.11	2193.69	2357.79	2493.71	2439.58	2500.1	2454.34	2498.87	2515.13	2479.99	2550.42	2487.71	2599.83	2488.8	2520.55	2586.47	2682.11	1998	0.0447	0.0978	0.1469	0.2156	0.495	599.451	1311.55	1970.01	2891.31	6638.21		1	0	0	0	0		599.451		0.484	Guyana	290.134
Haiti									1145.3	1155.59	1146.01	1115.6	1095.17	1082.45	1029.15	1032.78	1041.67	1062.35	1057.47	1073.76	1002.14	2001	0.0238	0.0625	0.1036	0.1764	0.6337	119.255	313.169	519.108	883.887	3175.28		1	0	0	0	0		119.255		0.597	Haiti	71.195
Honduras	2650.3	2661.54	2735.75	2830.28	2723.09	2765.45	2798.95	2873.91	2894.28	2780.43	2879.82	2898.07	2946.34	3018.8	3143.27	3267.56	3413.56	3553.59	3631.17	3472.92	3530.95	2009	0.0202	0.0612	0.1142	0.2051	0.5993	356.626	1080.47	2016.17	3620.99	10580.5		1	0	0	0	0		356.626		0.592	Honduras	211.122
Hungary	13119.7	11560.1	11210.3	11158.4	11503	11690.6	11729.6	12120.8	12643.9	13085.2	13673.6	14213.7	14896.6	15514.5	16294.8	16974.6	17663.6	17711.2	17900.9	16709.8	16958.3							0	0	0	0	0		1	0	0	0	0		0		0.449	Hungary	0
Iceland	25629.7	25277.7	24119.8	24189.4	24846.1	24740.5	25784.7	26830.9	28221.9	29024.2	29867.7	30629.1	30399.1	30924.2	33055.9	34889.2	35684.5	36875.4	36626	34106.1	32755.3							0	0	0	0	0		1	0	0	0	0		0		0.689	Iceland	0
India	1216.63	1205.28	1246.87	1281.5	1341.57	1416.99	1496.8	1530.2	1596.96	1708.94	1745.21	1799.64	1838.24	1951.77	2074.47	2233.86	2406.34	2606.16	2671.68	2860.55	3121.62		0.0854	0.121	0.157	0.208	0.428	1332.93	1888.58	2450.47	3246.48	6680.26		1	0	0	0	0		1332.93		0.535	India	713.117
Indonesia	2072.59	2218.47	2338.39	2466.63	2610.05	2785.08	2952.53	3045.67	2607.55	2590.45	2678.99	2736.88	2819.23	2911.92	3014.9	3141.29	3267.09	3425.31	3580.59	3695.17	3873.13	2010	0.0763	0.1133	0.1557	0.2182	0.4365	1477.6	2194.13	3015.23	4225.59	8453.11		1	0	0	0	0		1477.6		0.63	Indonesia	930.888
Iran	6036.61	6665.55	6849.38	6664.3	6565.17	6649.58	7009.02	7118.63	7179.31	7188.92	7437.98	7601.75	8068.12	8539.28	8870.03	9172.94	9600.79	10232	10344.6	10404.5	10404.5	2005	0.0643	0.1091	0.1554	0.2196	0.4516	3345.06	5675.68	8084.33	11424.2	23493.5		1	0	0	0	0		3345.06		0.382	Iran, Islamic Rep.	1277.81
Iraq								3212.61	4196.43	5077.42	4714.19	4274.52	3828.46	2184.86	3115.15	3013.85	2980.57	2950.5	3071.83	3171.25	3270.35	2007	0.087	0.1275	0.1669	0.2198	0.3988	1422.6	2084.85	2729.11	3594.11	6521.07		1	0	0	0	0		1422.6		0.356	Iraq	506.446
Ireland											33188.7	34394.4	35726.3	36514.5	37417.1	38762	39893.8	41133.4	39640.6	37198.1	36785.9							0	0	0	0	0		1	0	0	0	0		0		0.525	Ireland	0
Israel	17863.5	18115.4	18485	19000.3	19798.1	20535.2	21103.1	21276.3	21651.5	21815.5	23212.9	22621.5	22042.9	21975.8	22636.7	23340	24213.8	25095.1	25646.3	25250.2	26197.5							0	0	0	0	0		1	0	0	0	0		0		0.535	Israel	0
Italy	23730.9	24079.3	24263.7	24042.1	24554.2	25262.7	25542.1	26005	26374	26752.2	27717.1	28215.9	28254	28021.5	28226.9	28279.9	28737.7	29007.9	28453.6	26729.2	27059.1							0	0	0	0	0		1	0	0	0	0		0		0.442	Italy	0
Jamaica																7082.61					7082.61	2004	0.0535	0.0899	0.1349	0.2056	0.5161	1894.6	3183.63	4777.22	7280.92	18276.7		1	0	0	0	0		1894.6		0.555	Jamaica	1051.5
Japan	26522.6	27319.3	27474.8	27454	27596.9	28025.7	28683.5	29065	28410.9	28300.5	28889.2	28928.3	28944.6	29369.5	30052.7	30441.3	30960.8	31635.9	31322.7	29625.4	31029.7							0	0	0	0	0		1	0	0	0	0		0		0.571	Japan	0
Jordan	3291.53	2997.02	3377.52	3377.47	3410.47	3505.57	3471.11	3477.52	3474.19	3528.14	3588.79	3685.77	3805.62	3867.35	4098.5	4332.88	4578.94	4843.93	5082.05	5243.81	5248.54	2010	0.0771	0.1157	0.1567	0.2146	0.4359	2023.31	3036.28	4112.23	5631.69	11439.2		1	0	0	0	0		2023.31		0.371	Jordan	750.649
Kazakhstan	7089.13	6270.01	5941.82	5431.08	4816.13	4499.36	4590.87	4743.26	4734.16	4908.51	5405.77	6145.99	6748.02	7350.81	8000.7	8699.1	9528.59	10258.6	10468.8	10318.3	10915.7	2009	0.0912	0.1315	0.1707	0.2225	0.3841	4977.54	7177.05	9316.52	12143.7	20963.5		1	0	0	0	0		4977.54		0.674	Kazakhstan	3354.86
Kenya	1421.11	1394.53	1339.18	1302.19	1296.56	1315.01	1332.21	1303.51	1312.01	1308.07	1281.99	1295.61	1268.19	1270.55	1299.77	1339.96	1387.12	1445.02	1428.45	1428.78	1471.08		0.0484	0.0868	0.132	0.201	0.532	356.002	638.45	970.915	1478.44	3913.08		1	0	0	0	0		356.002		0.603	Kenya	214.669
Kiribati	1881.46	1767.8	1796.97	1835.41	1900.97	1857.09	1941.87	2018.43	2203.89	2170.32	2336.14	2311.44	2283.12	2332.4	2364.05	2319.97	2179.61	2307.11	2334.88	2284.66	2239.02							0	0	0	0	0		1	0	0	0	0		0			Kiribati	0
Kuwait						42714.2	42996.5	42693	42041.1	39104.7	39054.2	37861.8	37710	42817.3	45463.7	48096.5	48062.2	47464.7	47107.8	42363.4	39403.1							0	0	0	0	0		1	0	0	0	0		0		0.665	Kuwait	0
Kyrgyzstan	2523.49	2287.65	1947.33	1645.81	1315.71	1231.99	1299.89	1408.09	1416.07	1446.19	1506.62	1571.81	1557.18	1649.27	1743.93	1721.34	1755.78	1887.68	2026.93	2060.4	2026.37							0	0	0	0	0		1	0	0	0	0		0		0.606	Kyrgyz Republic	0
Laos	932.528	944.681	968.85	997.733	1050.68	1096.78	1145.69	1197.97	1220.55	1285.69	1337.49	1393.24	1455.73	1523.76	1597.87	1684.39	1796.9	1895.68	2002.11	2108.07	2242.12		0.0764	0.113	0.153	0.209	0.448	856.491	1266.8	1715.22	2343.02	5022.35		1	0	0	0	0		856.491		0.765	Lao PDR	655.215
Latvia	10108.7	8877.43	6109.67	5920.84	6152.62	6182.02	6489.05	7096.91	7502.49	7919.24	8529.2	9285.58	9955.87	10733.2	11727.8	13040.5	14716.1	16268.7	15647.1	12901.8	12948.3							0	0	0	0	0		1	0	0	0	0		0		0.48	Latvia	0
Lebanon	6257.49	8492.52	8656.43	9009.98	9489.69	9914	10295.7	9989.55	10277.7	10092.7	9979.67	9996.58	9869.42	9707.09	9990.49	9753.06	9588.08	10157.9	10977.1	11739.5	12288.8		0.0703333	0.111533	0.156867	0.219767	0.4415	4321.57	6853.07	9638.54	13503.4	27127.6		1	0	0	0	0		4321.57		0.425	Lebanon	1836.67
Lesotho	930.53	948.829	997.775	1010.86	1045.35	1048.78	1087.72	1118.03	1125.09	1118.56	1165.53	1204.9	1202.33	1249.94	1269.72	1294.7	1340.32	1392.74	1460.33	1499.39	1602.04	2003	0.0297	0.0721	0.1252	0.2095	0.5635	237.903	577.536	1002.88	1678.14	4513.75		1	0	0	0	0		237.903		0.499	Lesotho	118.714
Liberia	359.502	313.857	207.493	140.619	109.319	101.598	107.803	206.629	247.799	284.144	338.617	398.712	513.558	339.034	315.606	336.532	356.89	396.762	420.584	459.842	492.56	2007	0.064	0.114	0.157	0.216	0.45	157.619	280.759	386.66	531.965	1108.26		1	0	0	0	0		157.619		0.589	Liberia	92.8377
Libya										12502.7	12756.8	12016.8	11679.1	12997.3	13361.2	14454.4	15059.5	15699.1	16033.1	16129.5	16129.5		0.0735167	0.11665	0.16005	0.219933	0.43	5928.95	9407.55	12907.7	17737.1	34678.5		1	0	0	0	0		5928.95		0.488	Libya	2893.33
Lithuania	12499.7	11770.2	9278.08	7809.48	7095.88	7385.97	7828.05	8475.04	9187.91	9154.02	9518.31	10212.7	10952.1	12126.3	13088.2	14197.3	15402.3	17010.4	17599.6	15088.9	15534.5							0	0	0	0	0		1	0	0	0	0		0		0.483	Lithuania	0
Luxembourg	42706.9	45781.2	45999.1	47292.2	48435.1	48443.5	48512.7	50753	53379.4	57097.8	61091.2	61888.3	63748.2	64027.1	65882.4	68290.3	70527.1	74021.5	72176	66915.1	67742.5							0	0	0	0	0		1	0	0	0	0		0		0.545	Luxembourg	0
Macedonia	8097.09	7616	7157.9	6670.37	6586.88	6519.55	6569.43	6608.89	6759.46	6978.69	7233.43	6862.72	6890.12	7062.31	7371.88	7676.83	8048.55	8531.96	8945.12	8855.26	9104.28							0	0	0	0	0		1	0	0	0	0		0		0.378	Macedonia, FYR	0
Madagascar	1012.72	920.709	903.855	895.073	867.277	855.06	846.373	850.281	856.172	868.318	881.803	906.599	768.033	818.286	836.182	849.467	866.745	894.934	931.989	868.72	849.119	2010	0.0541	0.0948	0.1409	0.2088	0.5014	229.687	402.483	598.205	886.48	2128.74		1	0	0	0	0		229.687		0.858	Madagascar	197.071
Malawi	567.587	603.694	553.584	604.683	539.947	623.169	656.299	664.758	671.552	672.345	664.315	614.881	609.415	626.545	639.677	639.74	634.15	673.772	708.043	748.97	657.73	2010	0.056	0.095	0.14	0.207	0.502	184.164	312.422	460.411	680.75	1650.9		1	0	0	0	0		184.164		0.768	Malawi	141.438
Malaysia	6873.68	7329.04	7774.48	8328.54	8868.38	9496.24	10183.5	10655.6	9628.85	9978.36	10619	10448.7	10791.8	11197.8	11733.7	12130.6	12572.8	13122.1	13510	13071.9	13801.4	2009	0.0454	0.0865	0.1372	0.2164	0.5154	3132.91	5969.09	9467.73	14933.1	35566.1		1	0	0	0	0		3132.91		0.571	Malaysia	1788.89
Maldives												4518.59	4710.74	5286.77	5846.77	5248.57	6167.74	6699.07	7382.05	6984.25	7338.73	2004	0.0651	0.1088	0.1571	0.2266	0.4442	2388.76	3992.27	5764.57	8314.78	16299.3		1	0	0	0	0		2388.76		0.58	Maldives	1385.48
Mali	724.249	720.89	762.922	728.004	715.849	740.892	745.391	775.595	801.21	832.461	835.382	909.672	919.603	958.351	949.408	976.066	1026.75	1037.22	1054.65	1067.46	1095.12		0.0797	0.1199	0.1633	0.2241	0.413	436.405	656.524	894.165	1227.08	2261.42		1	0	0	0	0		436.405		0.604	Mali	263.589
Malta	13674.1	14385.2	14912.7	15433.7	16162.5	17071.9	17609.6	18409.5	19236.2	20046.2	21291	20338.9	20755.4	20646.6	20405.2	21018.6	21350.1	22119.9	22922.6	22204.5	22696.8							0	0	0	0	0		1	0	0	0	0		0		0.473	Malta	0
Mauritania	1737.86	1720.31	1703.78	1753.08	1651.11	1761.23	1809.9	1686.24	1710.91	1788.57	1728.03	1710.13	1670.03	1717.22	1762.57	1865.26	2154.53	2128.61	2143.69	2061.42	2110.19		0.0602	0.104	0.151	0.215	0.47	635.166	1097.3	1593.19	2268.45	4958.94		1	0	0	0	0		635.166		0.369	Mauritania	234.376
Mauritius	6104.29	6306.6	6629.52	6884.34	7069.41	7309.4	7639.31	7973.33	8368.9	8478.92	9153.88	9287.67	9403.12	9646.42	10113.2	10157.5	10478.9	11028.2	11561.2	11848.4	12278.6		0.0532	0.09475	0.13915	0.2049	0.508	3266.11	5817	8542.85	12579.5	31187.7		1	0	0	0	0		3266.11		0.542	Mauritius	1770.23
Mexico	10023.4	10231.1	10381.8	10579.9	10856.5	10032.8	10424.5	10951.2	11271.4	11386.7	11810.1	11575.2	11440.2	11459.9	11807.3	12017.1	12462.2	12694.6	12711.3	11962.5	12412.5		0.0493	0.0879	0.133	0.202	0.528	3059.68	5455.28	8254.3	12536.6	32768.9		1	0	0	0	0		3059.68		0.579	Mexico	1771.55
Moldova	4583.06	3839.38	2719.92	2690.18	1864.45	1847.8	1755.23	1787.26	1674.23	1619.87	1657.25	1762.28	1904.15	2035.54	2191.8	2361.95	2481.63	2563.93	2768.27	2605.75	2793.38							0	0	0	0	0		1	0	0	0	0		0		0.38	Moldova	0
Mongolia	2444.16	2197.69	1971.52	1892.43	1918.16	2024.89	2053.59	2116.14	2168.35	2215.57	2221.07	2265.68	2350.03	2488.8	2722.75	2885.28	3091.78	3361.9	3608.6	3510.31	3677.98	2008	0.071	0.1115	0.1562	0.2209	0.4404	1305.68	2050.47	2872.5	4062.33	8098.91		1	0	0	0	0		1305.68		0.572	Mongolia	746.851
Montenegro								7485.53	7863.42	7131.02	7354.13	7431.03	7562.33	7737.19	8061.57	8384.47	9090.27	10047.5	10726.1	10102.3	10343.7							0	0	0	0	0		1	0	0	0	0		0		0.408	Montenegro	0
Morocco	2698.7	2832.51	2671.05	2599.88	2823.08	2596.5	2870.1	2765.65	2936.32	2913.48	2923.98	3109.24	3178.23	3344.91	3471.35	3540.42	3779.25	3845.37	4020.92	4167.55	4268.03		0.0652	0.105	0.145	0.206	0.479	1391.38	2240.71	3094.32	4396.07	10221.9		1	0	0	0	0		1391.38		0.455	Morocco	633.076
Mozambique	395.041	404.687	371.801	389.257	400.525	397.75	414.681	444.944	480.529	506.478	498.626	542.806	574.334	591.969	626.075	661.864	684.895	715.412	744.424	771.296	805.048							0	0	0	0	0		1	0	0	0	0		0		0.783	Mozambique	0
Myanmar																					5507.1		0.0677143	0.107914	0.1523	0.217694	0.454514	1864.55	2971.47	4193.66	5994.32	12515.3		1	0	0	0	0		1864.55		0.752	Myanmar	1402.14
Namibia	3985.3	4161.93	4321.1	4109.97	4283.36	4329.11	4333.59	4381.07	4395.94	4428.13	4484.08	4458.71	4607.69	4747.42	5271.26	5341.32	5646.95	5871.02	5982.73	5827.26	6092.03		0.0315	0.0503	0.0824	0.15	0.686	959.494	1532.14	2509.91	4569.02	20895.6		1	0	0	0	0		959.494		0.477	Namibia	457.679
Nepal	747.246	775.217	786.656	796.023	839.361	846.464	869.268	890.711	895.725	914.033	950.019	975.796	958.821	979.471	1009.03	1028.85	1049.28	1071.87	1124.33	1162.21	1204.53	2010	0.0827	0.122	0.162	0.219	0.415	498.071	734.761	975.666	1318.96	2499.39		1	0	0	0	0		498.071		0.813	Nepal	404.932
Netherlands	26275.8	26705.4	26956.4	27105.8	27740.7	28464.1	29298.3	30394.9	31393.3	32645.9	33690.8	34081.4	33890.4	33844.1	34481	35104.5	36237.8	37576.7	38105.9	36520.1	36888.3							0	0	0	0	0		1	0	0	0	0		0		0.618	Netherlands	0
New Zealand	19515.5	18388.9	18399.9	19349.2	20050.6	20584.1	20918.5	21207.2	21295.3	22267.9	22636.8	23309.7	24027.1	24474.3	24960.1	25473.8	25590.5	26228.3	25498	25458.6	25215							0	0	0	0	0		1	0	0	0	0		0		0.632	New Zealand	0
Nicaragua	2437.09	2375.4	2326.81	2261.43	2282.17	2364	2462.62	2511.39	2558.16	2692.47	2759.04	2799.15	2781.62	2814.58	2926.44	3013.21	3098.72	3213.49	3299.16	3184.95	3255.62	2005	0.0622	0.1021	0.1479	0.2154	0.4724	1012.5	1661.99	2407.53	3506.3	7689.77		1	0	0	0	0		1012.5		0.576	Nicaragua	583.198
Niger	704.772	699.843	633.18	621.136	624.192	618.427	617.184	611.645	651.183	624.232	593.394	612.875	608.774	618.192	596.662	601.052	612.861	609.099	643.013	614.856	641.547	2008	0.0809	0.1183	0.1577	0.2125	0.4306	259.506	379.475	505.86	681.644	1381.25		1	0	0	0	0		259.506		0.614	Niger	159.337
Nigeria	1286	1245.9	1220.12	1214.8	1195.62	1162.57	1190.52	1193.67	1195.79	1171.74	1203.48	1225.37	1240.06	1334.12	1738.95	1752.63	1847.19	1921.4	1987.59	2068.33	2170.06		0.044	0.083	0.13	0.203	0.54	477.413	900.574	1410.54	2202.61	5859.15		1	0	0	0	0		477.413		0.514	Nigeria	245.39
North Korea																					13875.3		0.0634667	0.112167	0.166767	0.225367	0.4389	4403.11	7781.75	11569.7	15635.2	30449.4		1	0	0	0	0		4403.11				0
Norway	32362.7	33209.1	34181.3	34925.3	36481.2	37811.6	39539	41445.8	42305.1	42867.5	43975.9	44624.7	45051.4	45227.2	46741.6	47626.3	48330.3	49101.8	48526.4	47134.8	46773.9							0	0	0	0	0		1	0	0	0	0		0		0.633	Norway	0
Oman	15131	15412	16024.1	16341.2	16448.8	16907.1	17250.8	18277.1	18817	18783.6	19615.3	20645.1	20538.8	19904.5	19955.8	20273	21115.2	22420.9	25058.9	24671.5	24753.1		0.0718	0.113	0.153	0.21	0.453	8886.37	13985.5	18936.1	25990.8	56065.8		1	0	0	0	0		8886.37		0.548	Oman	4869.73
Pakistan	1631.13	1666.61	1748.17	1733.88	1753.31	1793.27	1831.13	1801.05	1799.28	1819.48	1854.11	1851.92	1875.41	1931.13	2036.92	2153.95	2245.3	2310.41	2306.39	2328.67	2324.34		0.096	0.129	0.164	0.212	0.4	1115.68	1499.2	1905.95	2463.8	4648.67		1	0	0	0	0		1115.68		0.512	Pakistan	571.229
Palestine																					6949.72							0	0	0	0	0		1	0	0	0	0		0				0
Panama	5899.54	6322.09	6700.8	6922.69	6975.26	6952.82	7002.14	7302.09	7678.34	7817.64	7869.24	7758	7776.11	7947.24	8383.29	8819.04	9396.41	10345.9	11192.4	11423.5	12067	2010	0.033	0.0775	0.1251	0.2006	0.5638	1991.05	4675.96	7547.9	12103.2	34016.8		1	0	0	0	0		1991.05		0.612	Panama	1218.52
Papua New Guinea	1688.85	1804.99	2004.5	2310.58	2386.35	2248.51	2359.8	2208.45	2069.55	2053.08	1950.4	1898.71	1848.37	1841.83	1845.78	1865.89	1868.19	1955.17	2037.36	2100.07	2217.11	1996	0.0452	0.0774	0.121	0.193	0.564	501.067	858.021	1341.35	2139.51	6252.25		1	0	0	0	0		501.067		0.707	Papua New Guinea	354.254
Paraguay	4537.79	4577.19	4539.72	4648.96	4781.08	4990.13	4955.29	5052.8	4948.38	4778.7	4572.2	4442.42	4353.18	4452.58	4544.48	4554.3	4685.45	4850.37	5067.22	4780.88	5312.81	2010	0.0326	0.0776	0.1277	0.1978	0.5643	865.988	2061.37	3392.23	5254.37	14990.1		1	0	0	0	0		865.988		0.659	Paraguay	570.686
Peru	4459.11	4465.18	4360.4	4482.65	4964.98	5296.03	5334.31	5602.99	5474.05	5436.81	5513.57	5447.42	5644.37	5797.48	6012.6	6349.05	6765.48	7288.07	7916.48	7904.27	8502.61	2010	0.0391	0.0834	0.1363	0.2153	0.5259	1662.26	3545.59	5794.53	9153.06	22357.6		1	0	0	0	0		1662.26		0.729	Peru	1211.79
Philippines	2538.4	2462.98	2413.5	2408.24	2457.25	2514.72	2602.72	2677.64	2604.5	2627.38	2685.56	2705.93	2747.22	2826.12	2957.18	3041.06	3143.89	3295	3375.03	3357.5	3553.5	2010	0.0598	0.0942	0.1387	0.2104	0.4969	1062.5	1673.7	2464.35	3738.28	8828.68		1	0	0	0	0		1062.5		0.6	Philippines	637.498
Poland	8182.09	7581.14	7748	8017.22	8423.76	8997.15	9551.21	10221.3	10726.7	11212.9	11753.4	11959	12137.2	12615.1	13297.1	13784.2	14651.8	15654.5	16454.8	16706.8	17372.3							0	0	0	0	0		1	0	0	0	0		0		0.505	Poland	0
Portugal	16177.4	16910	17090.7	16720.3	16845.3	17520.7	18117.3	18853.4	19747.5	20465.6	21154.9	21431.9	21438.7	21095.5	21300.4	21369	21606.9	22068	22036.9	21375.7	21779.6							0	0	0	0	0		1	0	0	0	0		0		0.552	Portugal	0
Qatar											64529.8	64703	67344.1	66475.7	73624.4	69497.7	69949.6	69300.9	69164.8	67313.1	70239.3		0.07565	0.1183	0.16115	0.21925	0.4252	26568	41546.6	56595.3	76999.8	149329		1	0	0	0	0		26568		0.86	Qatar	22848.5
Romania	7852.7	6899.38	6346.53	6451.22	6717.1	7212.62	7523.41	7084.64	6759.33	6688.71	6838.02	7329.35	7819.33	8249.06	8965.53	9361.41	10122.8	10750.5	11620.6	10873.2	10715.1							0	0	0	0	0		1	0	0	0	0		0		0.52	Romania	0
Russia	12625.6	11961.6	10219	9343.79	8179.43	7850.84	7588.8	7717.77	7328.87	7829.37	8612.66	9073.13	9546.04	10292.1	11088.2	11852.8	12877.7	14016.2	14767.3	13616.2	14181.6							0	0	0	0	0		1	0	0	0	0		0		0.583	Russian Federation	0
Rwanda	707.105	713.151	804.471	797.589	420.216	574.717	618.93	645.729	634.398	623.103	631.319	657.507	727.447	726.793	766.51	820.176	868.985	910.144	982.551	1013.49	1055.87		0.046	0.0787	0.115	0.174	0.586	242.849	415.483	607.122	918.603	3093.68		1	0	0	0	0		242.849		0.857	Rwanda	208.122
Saint Lucia	7562.79	7655.67	8090.77	8203.11	8224.05	8391.73	8732.19	8649.45	9074.44	9168.25	9118.87	8588.42	8513.87	8807.5	9448.09	9160.1	9876.8	9877.75	10247.9	10117.1	10032	1995	0.0523	0.0987	0.1481	0.2175	0.4834	2623.37	4950.79	7428.69	10909.8	24247.3		1	0	0	0	0		2623.37				0
Saint Vincent and the Grenadines	5426.49	5444.62	5843.95	5847.95	5670.65	5727.82	5806.95	6582.5	6928.16	7236.29	7194.33	7306.75	7752.62	8325.02	8654.73	8852.59	9517.82	9828.35	9954.7	9729.69	9452.86		0.0523	0.0987	0.1481	0.2175	0.4834	2471.92	4664.99	6999.85	10280	22847.6		1	0	0	0	0		2471.92				0
Samoa	2595.75	2517.38	2489.66	2566.34	2477.69	2618.86	2791.02	2798.5	2852.46	2904.46	3093.27	3294.65	3419.92	3560.96	3708.29	3837.69	3889.21	3933.86	4076.09	3841.82	3829.72		0.062	0.0987	0.141	0.203	0.496	1187.21	1889.97	2699.95	3887.16	9497.7		1	0	0	0	0		1187.21				0
São Tomé and Príncipe												1318.24	1319.67	1379.82	1410.19	1398.23	1432.4	1420	1504.09	1519.56	1543.66	2001	0.0523	0.085	0.1223	0.1769	0.5653	403.668	656.057	943.951	1365.37	4363.17		1	0	0	0	0		403.668				0
Saudi Arabia	18973	20040.1	20331.6	19770.6	19422.2	19073	19424.5	19705.9	20031.1	19538.9	19956.5	19348.3	18544.4	19178.6	19969.5	20680.4	21246.9	22047.6	23496.9	23542.8	24864.4		0.07325	0.115225	0.158725	0.21835	0.434225	9106.57	14325	19733	27145.7	53983.6		1	0	0	0	0		9106.57		0.487	Saudi Arabia	4434.9
Senegal	1427.55	1419.54	1393.77	1370.13	1330.91	1364.35	1356.18	1364.4	1410.45	1463.98	1473.57	1501.87	1472.28	1528.96	1575.33	1619.13	1614.29	1648.18	1662.27	1655.47	1677.62		0.0622	0.1061	0.1532	0.2197	0.4588	521.739	889.976	1285.06	1842.86	3848.45		1	0	0	0	0		521.739		0.687	Senegal	358.435
Serbia	11601.9	10453.7	7563.82	5220.11	5326.17	5647.89	6112.21	6781.66	6903.03	6152.12	6501.34	6857.69	7143.65	7353.77	8056.45	8517.05	8858.43	9374.71	9772.47	9468.32	9602.43							0	0	0	0	0		1	0	0	0	0		0		0.419	Serbia	0
Seychelles	13932.2	14164	14988.9	15685.2	15304.6	14931	15404.8	17048.1	18121.3	18110.1	18703.7	18262.9	17948	16995.3	16634.4	18045	19345.6	21252.2	20337.4	20033.4	20640	2007	0.0371	0.0566	0.0832	0.1268	0.6963	3828.72	5841.12	8586.25	13085.8	71858.2		1	0	0	0	0		3828.72			Seychelles	0
Sierra Leone	984.73	1005.26	818.478	838.105	830.079	768.428	783.38	735.725	742.515	715.436	742.883	664.801	802.559	836.931	851.711	855.336	876.156	923.007	951.748	963.684	996.548		0.0609	0.0965	0.1404	0.2093	0.4929	303.449	480.835	699.577	1042.89	2455.99		1	0	0	0	0		303.449		0.649	Sierra Leone	196.938
Singapore	25234	26115.5	27124.6	29482.7	31594.6	32879.6	33977.7	35651.4	33712.5	35516.7	38063.1	36622.6	37814.2	40134.4	43264.6	45374.2	47768.4	49952.3	48191.3	46391.4	52313.9							0	0	0	0	0		1	0	0	0	0		0		0.651	Singapore	0
Slovakia	12692.6	10834.4	10102.9	9692.01	10253	10820.4	11547	12037.6	12545.7	12537.7	12726.5	13193.7	13797.9	14455.3	15178.4	16174.8	17510.4	19326.7	20402.9	19353.9	20120.7							0	0	0	0	0		1	0	0	0	0		0		0.505	Slovak Republic	0
Slovenia	16454.7	14980.7	14183	14621.1	15417.8	15976	16569.1	17413.9	18065.3	19013.8	19766.3	20315.3	21066.6	21670.8	22610.2	23475.6	24769.6	26323.7	27225.5	24819.9	25052.9							0	0	0	0	0		1	0	0	0	0		0		0.55	Slovenia	0
Solomon Islands	2322.29	2393.31	2621.68	2649.6	2812.34	2959.01	2923.48	2802.34	2774.66	2686.76	2241.9	2008.51	1901.32	1972.93	2017.63	2074.98	2166.32	2342.55	2456.69	2373.36	2484.11		0.0452	0.0774	0.121	0.193	0.564	561.408	961.35	1502.89	2397.16	7005.18		1	0	0	0	0		561.408		0.634	Solomon Islands	355.933
Somalia																					1467		0.0629	0.105	0.149	0.212	0.472	461.372	770.175	1092.92	1555.02	3462.12		1	0	0	0	0		461.372		0.518	Somalia	238.99
South Africa	7974.71	7732.46	7410.96	7345.61	7422.84	7490.39	7641.05	7665.86	7526.47	7520.2	7641	7690.99	7863.9	7993.43	8259.3	8596.83	8977.29	9371.99	9604.82	9357.13	9516.45		0.027	0.0463	0.0816	0.163	0.682	1284.72	2203.06	3882.71	7755.91	32451.1		1	0	0	0	0		1284.72		0.387	South Africa	497.187
South Korea	8768.5	9503.69	9971.07	10488.3	11281.9	12141.6	12868	13340.8	12337	13411.7	14428.8	14891.6	15867.5	16231.5	16917.6	17550.9	18370.5	19218.6	19519.4	19489	20625.1	1998	0.0791	0.1356	0.1795	0.2313	0.3745	8157.23	13983.8	18511	23852.9	38620.5		1	0	0	0	0		8157.23				0
Spain	19776.7	20234	20354.8	20082.3	20505.6	21021.8	21480.2	22252.5	23165.6	24140.3	25147.1	25777.1	26095.4	26459.3	26882	27392	28044.4	28527.1	28353.9	27057.7	26908							0	0	0	0	0		1	0	0	0	0		0		0.472	Spain	0
Sri Lanka	2029.22	2091.58	2163.69	2284.14	2379.03	2475.97	2542.02	2671.05	2764.39	2842.12	3005.39	3006.96	3105.69	3246.93	3377.57	3550.21	3781.26	4001.79	4202.57	4301.72	4600.87	2010	0.0772	0.1139	0.1533	0.2097	0.4459	1775.94	2620.2	3526.57	4824.02	10257.6		1	0	0	0	0		1775.94		0.523	Sri Lanka	928.815
Sudan	993.777	1037.57	1072.62	1087.44	1065.4	1096.52	1129.02	1214.48	1232.99	1237.22	1279.95	1325.5	1371.37	1435.96	1449.7	1514.37	1619.81	1755.51	1757.83	1764.95	1777.48		0.0681	0.1165	0.164	0.2273	0.4241	605.233	1035.38	1457.54	2020.11	3769.15		1	0	0	0	0		605.233		0.455	Sudan	275.381
Suriname	5323.9	5390.91	5305.31	4855.2	4947.07	4934.66	4930.14	5142.68	5152.36	5037.62	4964.55	5117.73	5262.33	5501.05	5930.72	6125.71	6289.76	6543.3	6749.11	6888.34	7113.61	1999	0.0318	0.0723	0.1231	0.2035	0.5693	1131.06	2571.57	4378.42	7238.09	20248.9		1	0	0	0	0		1131.06		0.473	Suriname	534.993
Swaziland	3895.17	3854.2	3887.84	3929.5	3947.13	4055.13	4120.78	4154.72	4172.02	4215.4	4226.83	4231.83	4277.5	4350.22	4448.74	4517.54	4609.93	4701.14	4732.94	4712.22	4721.84	2010	0.0405	0.0773	0.12	0.2	0.566	956.172	1824.99	2833.1	4721.84	13362.8		1	0	0	0	0		956.172		0.437	Swaziland	417.847
Sweden	24564.9	24118.4	23699.6	23075.6	23831.6	24640.5	24998	25660.3	26724.5	27948	29145.5	29434.3	30067.2	30655.2	31828	32703	33917	34782.2	34300.6	32299.7	34125.3							0	0	0	0	0		1	0	0	0	0		0		0.58	Sweden	0
Switzerland	34418.7	33679.9	33296.1	32952.7	33106.1	33043.8	33057.6	33651.5	34469.1	34784	35858.9	36075.7	35870.2	35612.5	36224.9	36963.6	38110.4	39223.9	39566.8	38318.7	39041.6							0	0	0	0	0		1	0	0	0	0		0		0.648	Switzerland	0
Syria	2937.36	3078.76	3395.56	3472.73	3635.84	3739.63	3796.13	3756.9	3886.66	3653.75	3667.88	3782.45	3936.39	3890.46	4070.08	4205.52	4266.08	4334.85	4355.24	4466.08	4501.74	2004	0.0768	0.1143	0.1553	0.2143	0.4393	1728.67	2572.74	3495.6	4823.61	9888.06		1	0	0	0	0		1728.67		0.398	Syrian Arab Republic	688.009
Tajikistan	3008.52	2732.86	1903.22	1564.58	1212.79	1047.4	860.871	864.472	898.82	919.577	981.173	1063.51	1157.25	1259.86	1361.62	1422.59	1489.59	1573.35	1660.86	1679.45	1746.42	2009	0.0829	0.1275	0.1701	0.2258	0.3937	723.892	1113.34	1485.33	1971.71	3437.83		1	0	0	0	0		723.892		0.594	Tajikistan	429.992
Tanzania	858.426	847.904	824.771	807.468	794.496	798.813	812.482	819.726	829.379	848.493	868.498	897.569	937.455	976.049	1024.52	1070.07	1110.26	1155.62	1205.45	1240.44	1288.5		0.068	0.111	0.1565	0.217	0.448	438.091	715.119	1008.25	1398.03	2886.25		1	0	0	0	0		438.091		0.866	Tanzania	379.387
Thailand	3967.39	4261.62	4568.02	4910.14	5312.85	5755.14	6035.61	5889.08	5209.9	5378.03	5568.41	5623.63	5855.02	6205.9	6538.86	6790.7	7101.4	7437.83	7610.12	7422.5	7987.18	2010	0.0676	0.105	0.1462	0.2145	0.4667	2699.67	4193.27	5838.63	8566.25	18638.1		1	0	0	0	0		2699.67		0.717	Thailand	1935.66
The Bahamas	28945.7	27229.2	25696	25298.9	25649.5	26368.2	27130.4	27384.2	28371.1	30033.7	30826.4	31088	31305.4	30264.6	29890.1	30276.9	30434.7	30294.8	29056.3	27359.9	27169.9		0.0391	0.08465	0.1301	0.2002	0.54595	5311.72	11499.7	17674	27197.1	74167.1		1	0	0	0	0		5311.72				0
The Gambia	1604.93	1597.86	1600.94	1602.42	1561.02	1531.69	1522.63	1553.22	1562.81	1615.63	1654.94	1698.64	1593.15	1649.73	1710.99	1642.24	1609.41	1616.51	1656.59	1708.91	1763.78		0.0479	0.0856	0.132	0.206	0.528	422.425	754.898	1164.09	1816.69	4656.38		1	0	0	0	0		422.425				0
Timor-Leste										932.66	1053.4	1200.58	1085.3	1023.01	991.247	1038.75	974.711	1055.08	1173.71	1285.2	1367.26		0.0763	0.1133	0.1557	0.2182	0.4365	521.608	774.551	1064.41	1491.68	2984.04		1	0	0	0	0		521.608		0.371	Timor-Leste	193.517
Togo	933.91	903.492	846.271	701.437	787.422	828.784	879.903	981.36	934.633	933.531	902.65	865.292	835.319	854.151	849.807	837.743	849.366	846.639	843.41	850.715	862.041		0.0762	0.1174	0.1609	0.2215	0.424	328.438	506.018	693.512	954.71	1827.53		1	0	0	0	0		328.438		0.746	Togo	245.014
Tonga	2980.63	3166.65	3170.57	3285.06	3442.28	3562.01	3551.64	3533.89	3614.36	3736.71	3842.72	3959.22	4070.54	4132.97	4147.71	4219.59	4124.9	3928.25	3938.37	4041.95	4154.85		0.062	0.0987	0.141	0.203	0.496	1288	2050.42	2929.17	4217.17	10304		1	0	0	0	0		1288			Tonga	0
Trinidad and Tobago	10767.1	10983.9	10736.8	10522.4	10845.7	11232.5	11644.6	11937.6	12846	13386.1	14171.3	14701	15812.2	18007.9	19332.5	20343.6	23023.4	23997.2	24690.3	23497.6	23447.8	1992	0.0551	0.1033	0.1553	0.2274	0.4589	6459.86	12110.8	18207.2	26660.1	53800.9		1	0	0	0	0		6459.86		0.6	Trinidad and Tobago	3875.92
Tunisia	4467.54	4550.57	4806.56	4816.78	4880.8	4916.33	5191.28	5399.06	5585.64	5847.02	6053.52	6278.4	6320.9	6632.59	6971.97	7182.37	7492.73	7892.37	8173.72	8333.68	8494.59	2010	0.0674	0.1154	0.1623	0.2275	0.4292	2862.68	4901.38	6893.36	9662.6	18229.4		1	0	0	0	0		2862.68		0.41	Tunisia	1173.7
Turkey	8108.6	8030.67	8298.46	8791.96	8250.56	8762.33	9263.31	9811.75	9885.01	9408.76	9898.15	9199.39	9627.94	9994.09	10781.5	11532.5	12168.8	12577.4	12504.3	11754.2	12671.1	2010	0.0553	0.1056	0.1557	0.2235	0.4599	3503.56	6690.35	9864.46	14160	29137.2		1	0	0	0	0		3503.56		0.427	Turkey	1496.02
Turkmenistan	6114.92	5671.95	4686.89	4626.17	3729.08	3384.15	3543.47	3090.06	3264.8	3757.22	3916.94	4041.88	4009.63	4098.06	4258.23	4761.85	5224.93	5735.01	6498.73	6810.09	7343.65	1998	0.0614	0.1015	0.1473	0.2151	0.4747	2254.5	3726.9	5408.6	7898.1	17430.2		1	0	0	0	0		2254.5		0.537	Turkmenistan	1210.67
Uganda	567.959	578.99	578.629	606.097	624.012	673.788	712.018	725.396	737.732	772.484	771.553	785.269	825.691	849.823	877.319	901.767	965.849	1012.43	1064.24	1103.7	1129.8		0.0584	0.0964	0.1376	0.2003	0.5073	329.9	544.562	777.299	1131.49	2865.73		1	0	0	0	0		329.9		0.745	Uganda	245.776
Ukraine	8062.6	7369.08	6635.24	5688.15	4405.42	3898.65	3540.06	3465.29	3429.97	3455.54	3696.44	4077.3	4332.16	4777.99	5396.92	5583.4	6031.63	6547.08	6734.03	5762.92	6028.87							0	0	0	0	0		1	0	0	0	0		0		0.539	Ukraine	0
United Arab Emirates	73588.8	70273.2	68836.5	66150.1	67195.1	68201.4	68520	70205.7	66715.5	65326.7	69241	67839.2	67510	70283.9	70916.2	65573.1	61326.4	53233.5	46889	40637.1	36480.4		0.0643	0.1091	0.1554	0.2196	0.4516	11728.5	19900.1	28345.3	40055.5	82372.8		1	0	0	0	0		11728.5		0.75	United Arab Emirates	8796.34
United Kingdom	22421.3	22063.2	22288.5	23011.2	24089.7	24875	25678	26726.1	27598.9	28315.3	29445.1	29978.8	30554.3	31632.6	32471.9	33323.9	34032.2	34972.9	34473.8	32470.5	32765.5							0	0	0	0	0		1	0	0	0	0		0		0.57	United Kingdom	0
United States	32965.4	32504.2	33196.2	33660.6	34592.5	35112.3	36023.6	37189.7	38394.3	39795.5	40965	40946.4	41288.8	42077.9	43273.7	44313.6	45058.6	45431	44872.7	43234.5	43952.4							0	0	0	0	0		1	0	0	0	0		0		0.574	United States	0
Uruguay	7299.55	7504.79	8041.7	8195.12	8727.66	8539.57	8951.49	9648.41	10019.7	9774.28	9551.13	9167.63	8456.91	8530.37	8961.52	9626.21	10005.5	10633.9	11361.3	11576.5	12569.1							0	0	0	0	0		1	0	0	0	0		0		0.61	Uruguay	0
Uzbekistan	2002.21	1950.33	1691.76	1615.71	1501.92	1461.75	1458.44	1505.62	1545.29	1594.46	1632.3	1679.47	1725.4	1777.06	1891.94	2000.97	2121	2289.67	2455.99	2610.5	2753.56	2003	0.0714	0.1152	0.1567	0.2148	0.4419	983.021	1586.05	2157.41	2957.32	6083.99		1	0	0	0	0		983.021		0.539	Uzbekistan	529.848
Vanuatu	3463.23	3473.73	3461.32	3387.54	3595.45	3544.89	3552.14	3658.48	3750.06	3694.73	3835.04	3618.6	3351.05	3407.06	3452.87	3544.97	3750.42	3848.66	3998.82	4033.81	4004.83		0.062	0.0987	0.141	0.203	0.496	1241.5	1976.39	2823.41	4064.91	9931.99		1	0	0	0	0		1241.5			Vanuatu	0
Venezuela	9578.43	10261.9	10635.1	10428.2	9963.63	10139.1	9910.58	10329.8	10156.1	9365.37	9526.64	9666.66	8649.53	7835.35	9104.38	9869.17	10658	11396.1	11799.4	11236.7	10894							0	0	0	0	0		1	0	0	0	0		0		0.593	Venezuela, RB	0
Vietnam	1013.96	1054.82	1125.8	1195.82	1279.83	1379.13	1484	1580.14	1645.77	1698.66	1789.78	1876.69	1972.29	2084	2214.39	2353.88	2490.34	2639.13	2759.03	2877.44	3030.3	2008	0.0742	0.1152	0.1581	0.2184	0.4341	1124.24	1745.45	2395.45	3309.09	6577.26		1	0	0	0	0		1124.24		0.749	Vietnam	842.056
Yemen	1836.73	1858.64	1909.96	1887.14	1920.28	1945.18	1962.12	1999.38	2058.55	2077.17	2144.27	2163.19	2185.16	2204.05	2229.52	2292.59	2305.52	2323.95	2350.85	2383.95	2507.41		0.0718	0.113	0.153	0.21	0.453	900.16	1416.69	1918.17	2632.78	5679.28		1	0	0	0	0		900.16		0.395	Yemen, Rep.	355.563
Zambia	1251.05	1220.46	1171.46	1222.34	1090.69	1034.04	1077.59	1083.67	1034.94	1029.82	1038.41	1061.78	1069.83	1096.9	1127.19	1156.82	1196.58	1235.91	1274.16	1312.35	1370.47		0.0358	0.0663	0.104	0.175	0.622	245.315	454.312	712.646	1199.16	4262.17		1	0	0	0	0		245.315		0.691	Zambia	169.512
Zimbabwe	678.552	697.99	620.708	614.392	658.339	647.442	702.052	708.92	718.418	703.612	675.6	680.801	617.593	511.331	480.878	452.789	436.644	420.169	344.742	362.4	391.55		0.0463	0.0814	0.122	0.193	0.557	90.6439	159.361	238.846	377.846	1090.47		1	0	0	0	0		90.6439		0.827	Zimbabwe	74.9625
																																		1	0	0	0	0
																																		1	0	0	0	0
																																		1	0	0	0	0
WOMEN																																		1	0	0	0	0
Afghanistan													760.825	792.472	770.744	827.849	847.564	937.753	947.071	1118.19	1183.05		0.094	0.136	0.174	0.221	0.375	556.031	804.471	1029.25	1307.26	2218.21		1	0	0	0	0		556.031		0.44		244.654
Albania	3731.69	2617.74	2438.36	2695.57	2947.69	3366.1	3690.9	3324.1	3752.87	4141.26	4461.05	4800.72	4973.98	5296.79	5649.74	5997.9	6330.59	6732.37	7272.84	7525.78	7791.76							0	0	0	0	0		1	0	0	0	0		0		0.473		0
Algeria	5861.82	5650.65	5618.35	5378.78	5220.04	5314.39	5434.08	5403.29	5591.34	5686.16	5730.07	5914.06	6164.18	6521.82	6709.17	7000.5	7006.79	7123.26	7137.94	7128.01	7249.23		0.0697	0.116	0.162	0.226	0.426	2526.36	4204.55	5871.88	8191.63	15440.9		1	0	0	0	0		2526.36		0.388		980.226
Angola	3031.31	2905.28	2618.77	1907.88	1912.22	2048.05	2213.96	2325.47	2418.27	2427.68	2426.4	2447.89	2692.41	2735.48	2927.6	3343.43	3900.41	4622.25	5088.1	5042.32	5048.11		0.054	0.096	0.145	0.218	0.486	1362.99	2423.09	3659.88	5502.44	12266.9		1	0	0	0	0		1362.99		0.644		877.766
Antigua and Barbuda	14733.4	14911.5	14795.7	15248.5	15803.6	14744.9	15313.9	15620.2	15874.9	16130.3	16602.1	15814.4	16057.1	16929.5	17584.2	18468.1	20741.7	22488.2	22244	19293.5	17610.2	1993	0.0523	0.0987	0.1481	0.2175	0.4834	4605.07	8690.64	13040.4	19151.1	42563.9		1	0	0	0	0		4605.07				0
Argentina	7462.31	8293.29	9160.16	9575.23	10005.2	9599.47	10006.2	10688.5	10971.4	10482.3	10290.1	9738.71	8596.05	9271.2	10019.1	10842.7	11657.8				11657.8		0.0438	0.0931	0.1478	0.2217	0.4936	2553.06	5426.71	8615.13	12922.7	28771.5		1	0	0	0	0		2553.06		0.558		1424.61
Armenia	2937.89	2618.38	1551.47	1448.46	1563.67	1706.19	1834.58	1917.12	2073.39	2155.06	2295.36	2527.98	2873.49	3288.8	3645.53	4165.79	4734.44	5408.85	7467.32	6430.85	6582.66		0.0882	0.1279	0.1651	0.2141	0.4047	2902.95	4209.61	5433.99	7046.74	13320		1	0	0	0	0		2902.95		0.499		1448.57
Australia	23865.2	23480.2	23296.4	24017.9	24727.2	25404.9	26074.7	26790.3	27712	28754.6	29506.6	29664.4	30451.2	31025.5	31939.8	32525.6	33024.4	33756.8	34425.4	34359.1	34620.9							0	0	0	0	0		1	0	0	0	0		0		0.621		0
Austria	25437.5	26051.5	26305.8	26227.2	26754	27425.8	28064.4	28679.9	29732.9	30725.4	31775.7	31925.7	32307.1	32428.5	33062.5	33626.4	34688.3	35834.6	36191.7	34690.5	35201.2							0	0	0	0	0		1	0	0	0	0		0		0.579		0
Azerbaijan	4753.93	4647.93	3543.41	2683.8	2126.15	1853.79	1859.03	1947.97	2122.52	2259.67	2489.95	2715.34	2980.84	3289.68	3593.63	4496.14	5981.24	7395.16	8021.57	8596.12	8906.8		0.0799	0.1209	0.1616	0.2168	0.4208	3558.27	5384.16	7196.69	9654.97	18739.9		1	0	0	0	0		3558.27		0.609		2166.98
Bahrain	17799.3	19266	20039.5	22071.4	21476.7	21744.2	22014.4	22022.7	22325.1	22435.8	22658.8	22666.2	22757.9	23147.7	23000.7	23130.7	22826.9	22780.7	22400	21631.1	21487.7	2005	0.0643	0.1091	0.1554	0.2196	0.4516	6908.3	11721.5	16696	23593.5	48519.3		1	0	0	0	0		6908.3		0.653		4511.12
Bangladesh	732.371	739.281	759.293	776.98	791.684	813.35	833.345	860.357	887.342	912.733	949.339	982.003	1008.32	1044.7	1094.1	1143.87	1205.11	1268.66	1333.42	1395.52	1464.32		0.0888	0.124	0.161	0.213	0.414	650.159	907.88	1178.78	1559.5	3031.15		1	0	0	0	0		650.159		0.675		438.858
Barbados	19756.5	19119.3	18112.6	18239.1	18911.6	19140.6	19438.5	20625.1	21411.5	21896.4	22318.7	21659.9	21706.2	22026.7	22230.6	23004	24196.8	24480.6	24444.5	23317.4	23260.6							0	0	0	0	0		1	0	0	0	0		0		0.635		0
Belarus	6434.06	6353.73	5731.41	5283.92	4671.18	4198.92	4330.94	4845.17	5277.2	5475.12	5810.04	6131.78	6482.28	6987	7840.61	8640.33	9562.58	10437.3	11545.6	11590	12504.8							0	0	0	0	0		1	0	0	0	0		0		0.495		0
Belgium	25096.5	25461.7	25746.8	25399.7	26138.7	26706	27033.6	27975.5	28454.3	29394.2	30399	30539.3	30816.1	30934.9	31809.9	32189.4	32830.4	33529.9	33593.8	32391.3	32842.4							0	0	0	0	0		1	0	0	0	0		0		0.494		0
Belize	4208.51	4557.54	5013.7	5233.7	5140.21	5057.98	4999.48	5031.98	5067.18	5350.98	5878.16	6006.53	6149.26	6551.71	6683.07	6707.53	6844.78	6753.07	6837.44	6687.53	6776.44	1999	0.0327	0.0859	0.1124	0.1938	0.5752	1107.95	2910.48	3808.36	6566.37	19489		1	0	0	0	0		1107.95		0.599		663.661
Benin	1100.03	1106.41	1097.69	1119.25	1101.54	1129.32	1141.79	1172.16	1184.12	1211.46	1232.18	1268.02	1281.25	1287.42	1284.51	1279.39	1286.32	1305.05	1329.95	1325.89	1321.27		0.07	0.108	0.15	0.21	0.461	462.445	713.487	990.954	1387.33	3045.53		1	0	0	0	0		462.445		0.72		332.96
Bhutan	1801.94	1797.39	1903.57	1975.97	2104.09	2263.92	2373.65	2460.16	2544.18	2672.88	2778.42	2920.77	3139.17	3281.46	3378.96	3527.67	3683.49	4255.57	4371.95	4584.08	5030.86	2007	0.0664	0.1079	0.1538	0.2204	0.4515	1670.25	2714.15	3868.73	5544.01	11357.2		1	0	0	0	0		1670.25		0.691		1154.14
Bolivia	3012.78	3097.28	3074.66	3131.44	3202.49	3276.97	3344.73	3434.94	3531.7	3473.39	3488.05	3475.67	3491.86	3517.55	3596.22	3688.15	3799	3907.1	4080.85	4150.6	4252.44	2008	0.0213	0.068	0.1191	0.1985	0.5931	452.885	1445.83	2532.33	4220.55	12610.6		1	0	0	0	0		452.885		0.698		316.114
Bosnia and Herzegovina					1254.47	1574.97	3006.28	3982.51	4471.24	4755.26	4909.04	5065.6	5309.14	5524.05	5874.68	6179.37	6570.4	7031.47	7426.9	7225.29	7290.09							0	0	0	0	0		1	0	0	0	0		0		0.329		0
Botswana	7875.45	8221.65	8227.23	8160.78	8240.28	8604.67	8895.44	9398.62	9271.8	9974.92	9996.71	9864.56	10315.1	10653.1	10810.8	11176.4	11937.8	12844	13217.2	12068.5	12988.4		0.0313	0.0581	0.0964	0.164	0.65	2032.68	3773.13	6260.4	10650.5	42212.3		1	0	0	0	0		2032.68		0.629		1278.56
Brazil	7174.98	7163.55	7017.37	7231.85	7501.92	7714.33	7760.28	7900.45	7784.48	7689.4	7905.65	7898.11	7998.26	7984.97	8337.67	8502.32	8745.05	9187.14	9572.94	9456.43	10079.3		0.0285	0.0713	0.124	0.19	0.586	1436.3	3593.27	6249.16	9575.32	29532.3		1	0	0	0	0		1436.3		0.645		926.412
Brunei	49451	49578.2	50485.3	49241.6	49426.4	50303.9	50467.4	48538.7	47155.3	47503.3	47782	48034.4	48843.9	49233.1	48501.1	47760	48944.6	48153.7	46419.6	44862.2	45319.3							0	0	0	0	0		1	0	0	0	0		0		0.625		0
Bulgaria	7524.17	6957.3	6520.98	6475.91	6616.07	6835.68	6250.57	6185.26	6529.37	6695.05	7111.7	7548.89	8056.18	8548.06	9170.47	9809.4	10502.5	11231.9	11985.2	11383.1	11505.8							0	0	0	0	0		1	0	0	0	0		0		0.479		0
Burkina Faso	709.495	753.405	735.094	740.208	729.765	750.585	810.551	838.124	874.537	913.138	903.885	936.14	956.251	1001.33	1016.06	1072.18	1111.59	1118.28	1148.87	1148.82	1204.5		0.0672	0.1058	0.1479	0.2087	0.4704	404.713	637.182	890.73	1256.9	2832.99		1	0	0	0	0		404.713		0.808		327.008
Burundi	688.563	704.876	695.909	639.331	603.907	547.349	496.796	483.133	499.952	487.523	474.002	472.07	479.164	458.536	464.928	453.439	461.683	467.18	473.922	473.748	475.384		0.09	0.119	0.154	0.21	0.428	213.923	282.854	366.046	499.153	1017.32		1	0	0	0	0		213.923		0.758		162.154
Cambodia				773.917	815.775	841.006	860.832	884.848	906.16	990.754	1054.48	1116.43	1168.91	1246.27	1352.66	1508.14	1646.1	1788.84	1882.09	1856.59	1937.07		0.0793	0.114	0.153	0.21	0.445	768.05	1104.13	1481.86	2033.93	4309.99		1	0	0	0	0		768.05		0.811		622.889
Cameroon	2100.8	1962.26	1846.98	1737.32	1646.66	1654.27	1689.99	1728.78	1768.01	1797.42	1824.22	1857.28	1882.06	1907.76	1927.83	1921.79	1933.17	1937.5	1956.82	1942.92	1957.22		0.067	0.105	0.149	0.217	0.462	655.668	1027.54	1458.13	2123.58	4521.18		1	0	0	0	0		655.668		0.672		440.609
Canada	26941.2	26021.1	25928.6	26246.1	27243.9	27778	27925.3	28799.4	29721	31106.7	32446.8	32693.9	33349.5	33640	34343.7	35033.4	35730.4	36126.7	35949.6	34529.7	35222.5							0	0	0	0	0		1	0	0	0	0		0		0.613		0
Cape Verde	1018.16	1010.4	1092.86	1155.98	1340.93	1493.27	1624.82	1767.55	1949.71	2127.39	2385.9	2393.77	2473.77	2534.04	2753.29	2912.41	3123.47	3584.13	3815.1	3891.66	4018.99	2002	0.0454	0.0791	0.1227	0.1938	0.559	912.312	1589.51	2465.65	3894.41	11233.1		1	0	0	0	0		912.312				0
Central African Republic	754.022	733.055	669.953	656.205	672.124	704.006	660.796	680.695	697.733	708.395	677.699	695.394	708.455	659.298	687.343	681.8	720.664	765.011	779.933	833.248	871.445		0.034	0.069	0.111	0.18	0.606	148.146	300.649	483.652	784.301	2640.48		1	0	0	0	0		148.146		0.727		107.702
Chad	1037.62	1091.16	1141.97	932.626	994.761	974.628	963.635	984.415	1017.28	975.161	931.854	1001.9	1045.84	1154.54	1486.33	1683.11	1638.01	1638.21	1636.75	1654.68	1822.87		0.063	0.104	0.15	0.218	0.466	574.204	947.892	1367.15	1986.93	4247.28		1	0	0	0	0		574.204		0.661		379.549
Chile	6913.58	7330.04	8079.9	8488.39	8817.3	9595.37	10150.5	10668.1	10866.7	10647.6	10990.3	11224	11336.6	11655.4	12227.6	12773.4	13201.3	13745.7	14061.4	13784.2	14443.4	2009	0.0426	0.0794	0.1174	0.1836	0.577	3076.44	5734.02	8478.26	13259	41669.1		1	0	0	0	0		3076.44		0.554		1704.35
China	1100.66	1185.63	1337.5	1507.32	1685.62	1849.15	2012.86	2177.65	2325.09	2480.23	2667.47	2867.96	3108.05	3397.63	3718.64	4114.57	4611.3	5238.68	5712.25	6206.82	6819.32		0.0467	0.0974	0.153	0.232	0.471	1592.31	3321.01	5216.78	7910.41	16059.5		1	0	0	0	0		1592.31		0.678		1079.59
Colombia	6077.7	6097.05	6283.46	6313.11	6559.69	6776.71	6793.03	6902.73	6822.06	6424.31	6596.65	6598.07	6655.37	6807.84	7060.36	7280.29	7651.42	8058.64	8223.49	8240.76	8449.59	2010	0.03	0.0683	0.1123	0.1879	0.6015	1267.44	2885.53	4744.44	7938.39	25412.1		1	0	0	0	0		1267.44		0.593		751.591
Comoros	1281.52	1183.2	1253.56	1260.59	1165.6	1178.56	1134.95	1151.57	1137.3	1130.15	1117.36	1125.45	1142.52	1141.11	1109.41	1126.8	1111.57	1088.41	1071	1062.88	1057.71	2004	0.0255	0.0535	0.0894	0.1514	0.6802	134.858	282.937	472.796	800.686	3597.27		1	0	0	0	0		134.858		0.533		71.8793
Congo	3565.69	3556	3554.75	3429	3155.71	3193.65	3239.07	3128.52	3154.46	2989.14	3131.5	3170.03	3236.45	3185.45	3214.53	3371.94	3480.26	3322.95	3401.68	3547.15	3748.22		0.05	0.084	0.13	0.205	0.531	937.056	1574.25	2436.34	3841.93	9951.53		1	0	0	0	0		937.056		0.656		614.709
Costa Rica	6222.09	6225.54	6632.25	6954.59	7109.09	7208.09	7091.74	7300.22	7717.98	8154.4	8115.65	8031.53	8102.41	8461.54	8665.75	9019.11	9649.33	10250	10368.5	10110	10455.7	2009	0.0385	0.08	0.1241	0.1987	0.5587	2012.73	4182.3	6487.79	10387.8	29208.1		1	0	0	0	0		2012.73		0.581		1169.4
Côte d’Ivoire	1973.91	1909.43	1842.85	1780.95	1740.29	1809.41	1893.99	1947.76	1988.21	1973	1861.24	1828.11	1774.42	1722.56	1729.47	1726.06	1711.45	1713	1723.06	1754.87	1761.36		0.056	0.1007	0.149	0.218	0.4763	493.181	886.845	1312.21	1919.88	4194.68		1	0	0	0	0		493.181		0.646		318.595
Croatia						9925.11	10922.1	11438.3	11848.4	11588.3	12370.7	12782.5	13406.1	14126.1	14712.6	15331.9	16095.8	16925.5	17286.1	16103.3	15917.3							0	0	0	0	0		1	0	0	0	0		0		0.46		0
Cuba	3635.51	3221.25	2828.87	2393.82	2398.29	2445.26	2625.24	2687.7	2682.24	2838.64	2996.63	3081.73	3115.54	3223.94	3401.69	3776.47	4228.75	4535.62	4724.57	4796.23	4913.85		0.0481667	0.0882333	0.134367	0.207233	0.522	1183.42	2167.83	3301.29	5091.56	12825.1		1	0	0	0	0		1183.42		0.552		653.247
Cyprus	18091.4	17759.5	18918.8	18596.7	19290.8	20099.8	20147.7	20330.6	21095.7	21872	22731.9	23393.5	23587	23630.3	24062	24408.1	24929.6	25826.6	26456.3	25789.9	25198							0	0	0	0	0		1	0	0	0	0		0		0.603		0
Czech Republic	16361	14495.4	14407.2	14401.2	14814.8	15746.2	16480.1	16357.3	16334.1	16625.4	17340.8	17940.4	18382.8	19070.5	19958	21264.4	22683.4	23833.5	24359.5	23122.2	23619.7							0	0	0	0	0		1	0	0	0	0		0		0.541		0
Democratic Republic of the Congo	657.95	580.232	498.965	414.973	384.541	375.244	361.844	334.114	322.235	302.236	274.996	262.414	264.114	271.432	281.1	294.386	302.079	312.018	322.038	322.037	335.679		0.055	0.092	0.138	0.209	0.506	92.3119	154.413	231.619	350.785	849.269		1	0	0	0	0		92.3119		0.667		61.572
Denmark	25442.2	25706.2	26127.5	26017.3	27362.3	28054.4	28686.8	29481.6	30009.4	30676.1	31652.5	31761.6	31807.8	31843.2	32490.4	33193.2	34207.4	34595.3	34123	32017.7	32378.6							0	0	0	0	0		1	0	0	0	0		0				0
Djibouti	2607.47	2403.59	2339.07	2141.58	2086.1	1979.35	1864.5	1818.3	1788.83	1797.68	1777.11	1786.7	1807.12	1838.65	1882.35	1914.98	1978.97	2050.87			2050.87		0.0603	0.105	0.152	0.218	0.465	618.339	1076.71	1558.66	2235.45	4768.28		1	0	0	0	0		618.339				0
Dominican Republic	3806.71	3766.1	4080.33	4290.95	4307.88	4462.74	4698.19	4989.48	5252.73	5516.5	5737.36	5750.96	5991.26	5886.45	5875.55	6326.36	6901.07	7380.22	7660.4	7817.5	8312		0.0467	0.0859	0.1315	0.2081	0.5278	1940.85	3570.01	5465.14	8648.64	21935.4		1	0	0	0	0		1940.85		0.568		1102.4
Ecuador	6264.86	6384.22	6373.09	6356.01	6483.59	6488.83	6463.34	6604.69	6682.71	6239.3	6183.57	6307.18	6440.02	6490.95	6894.51	7128.62	7311.78	7343.67	7679.19	7594.98	7691.75		0.0429	0.0823	0.1289	0.2071	0.5379	1649.88	3165.15	4957.33	7964.81	20687		1	0	0	0	0		1649.88		0.646		1065.82
Egypt	3266.44	3241.21	3327.85	3370.28	3450.43	3555.33	3675.3	3817.48	3910.19	4084.34	4235.99	4316.07	4347.31	4413.16	4518.34	4642.37	4877.65	5136.2	5411.73	5570.64	5759.76		0.0924	0.13	0.164	0.21	0.403	2661.01	3743.85	4723.01	6047.75	11605.9		1	0	0	0	0		2661.01		0.442		1176.17
El Salvador	3664.11	3738.44	3957.82	4184.06	4374.36	4597.27	4628.39	4784.98	4930.84	5071.84	5154.95	5219.83	5321.56	5424.94	5506.21	5681.51	5880.37	6079.98	6128.6	5906.15	5953.33		0.0371	0.0883	0.137	0.2067	0.5309	1104.34	2628.4	4078.03	6152.77	15803.1		1	0	0	0	0		1104.34		0.575		634.997
Equatorial Guinea	1999.26	1912.26	2046.82	2103.27	2137.86	2363.57	2954.98	4898.65	5784.75	7927.7	8639.47	13681.8	15846.5	17513.1	23448.9	24981.8	20342.1	24096.2	27346.4	26805.5	25619.2		0.0595	0.0968333	0.141633	0.2104	0.491633	7621.72	12404	18142.7	26951.4	62976.3		1	0	0	0	0		7621.72		0.799		6089.75
Eritrea			430.155	486.177	585.62	594.957	637.768	671.399	663.184	641.073	598.239	624.879	616.604	574.603	558.831	550.953	526.002	515.606	450.271	452.938	448.1		0.069	0.115	0.16	0.22	0.436	154.595	257.658	358.48	492.91	976.859		1	0	0	0	0		154.595		0.777		120.12
Estonia						7938.07	8530.55	9641.1	10397	10448	11512.5	12284.2	13142.7	14216.5	15166.1	16548	18253.4	19648.4	18846.8	16194.6	16611.3							0	0	0	0	0		1	0	0	0	0		0		0.51		0
Ethiopia	543.09	487.082	429.455	469.213	468.024	480.818	524.098	524.74	492.215	503.064	518.538	545.613	538.108	511.551	564.692	614.014	662.082	718.207	774.692	820.859	879.042		0.0926	0.1322	0.1678	0.2133	0.3941	406.997	581.047	737.516	937.499	1732.15		1	0	0	0	0		406.997		0.794		323.155
Federated States of Micronesia	1969.01	2062.39	2089.81	2205.03	2149.4	2269.59	2183.01	2047.5	2113.28	2151.02	2257.09	2302.1	2319.96	2366.01	2294.74	2352.64	2360.17	2324.52	2278	2311.31	2378.12							0	0	0	0	0		1	0	0	0	0		0				0
Fiji	3433.89	3309.95	3468.78	3493	3619.65	3662.67	3794.16	3671.15	3683.95	3977.13	3886.45	3949.32	4068.03	4103.75	4311.9	4323.66	4374.1	4298.83	4299.69	4202.02	4167.19	2009	0.062	0.0987	0.1407	0.2027	0.4959	1291.83	2056.51	2931.62	4223.45	10332.6		1	0	0	0	0		1291.83		0.503		649.79
Finland	23141	21634.1	20763.2	20495.4	21152.9	21907.3	22615	23947.1	25085.2	26005.2	27332.8	27893.5	28336.3	28837.7	29940.2	30707.9	31939.5	33500.8	33443	30441.5	31321.7							0	0	0	0	0		1	0	0	0	0		0		0.552		0
France	24211.7	24401.6	24639.3	24368.9	24823.9	25240.6	25419.9	25883.2	26659.2	27395.5	28209.9	28519.5	28576	28629.6	29142.9	29452.5	29969.5	30465.5	30271.4	29168.4	29521.7							0	0	0	0	0		1	0	0	0	0		0		0.509		0
Gabon	14665.4	15148.5	14294	14470.8	14620.1	14953.8	15101.4	15564.9	15704.3	13950	13356.6	13317.8	12972	12984.9	12853.9	12931.8	12774.9	13163.1	12976.8	12299.3	12810.8	2005	0.0616	0.1012	0.1454	0.21	0.4818	3945.72	6482.26	9313.44	13451.3	30861.2		1	0	0	0	0		3945.72		0.479		1890
Georgia	6138.17	4809.07	2629.35	1844.72	1669.7	1759.29	2006.29	2258.68	2351.8	2438.19	2502.23	2641.55	2804.94	3135.34	3327.13	3610.49	3916.4	4409.47	4516.24	4319.02	4545.9	2010	0.0503	0.0994	0.151	0.2232	0.4761	1143.29	2259.31	3432.16	5073.23	10821.5		1	0	0	0	0		1143.29		0.535		611.663
Germany	25881.1	27005.6	27313.5	26862.6	27431.3	27809.4	27948.3	28392.3	28916.5	29438.6	30297.6	30704.7	30656.3	30524.3	30885.4	31114.5	32302.2	33402.8	33828.9	32169.6	33511.7							0	0	0	0	0		1	0	0	0	0		0		0.551		0
Ghana	917.315	939.164	948.569	967.342	972.843	987.371	1008.26	1026.69	1051	1072.44	1086.09	1102.11	1123.01	1151.42	1184.75	1222.46	1267.29	1314.54	1389.32	1409.31	1486.31	2006	0.052	0.0984	0.1473	0.2164	0.4855	386.441	731.266	1094.67	1608.19	3608.02		1	0	0	0	0		386.441		0.664		256.597
Greece	17325	17689	17617.7	17177.4	17375.7	17604.8	17894.1	18429.2	18946.5	19508.4	20316.7	21106.7	21757.9	22975.8	23896.5	24348.4	25587.7	26387.6	26227.3	25302	23998.7							0	0	0	0	0		1	0	0	0	0		0		0.472		0
Grenada	6283.88	6416.95	6348.83	6112.01	6210.74	6312.27	6533	6811.86	7244.81	7963.61	8148.58	7959.94	8230.07	8999.64	8882.26	10053.8	9636.64	10175.5	10246.2	9535.2	9496.55		0.0523	0.0987	0.1481	0.2175	0.4834	2483.35	4686.55	7032.19	10327.5	22953.2		1	0	0	0	0		2483.35				0
Guatemala	3343.84	3386.82	3468.98	3522.14	3580.15	3671.71	3694.91	3769.43	3868.28	3925.01	3971.46	3966.81	4019.77	4020	4044.46	4073.83	4188.46	4344.66	4378.59	4294.43	4309.05		0.0308	0.0685	0.114	0.185	0.603	663.594	1475.85	2456.16	3985.87	12991.8		1	0	0	0	0		663.594		0.651		432
Guinea	854.307	830.862	809.305	802.253	792.149	794.484	803.522	824.608	838.413	855.833	862.689	879.248	909.284	904.751	908.644	916.655	918.195	911.27	931.44	904.404	897.945		0.064	0.105	0.151	0.219	0.462	287.342	471.421	677.949	983.25	2074.25		1	0	0	0	0		287.342		0.695		199.703
Guinea-Bissau	1207.01	1240.13	1225.54	1223.08	1233.89	1259.45	1374.43	1431.58	1006.78	994.896	1008.63	1057.88	1055.43	981.402	952.892	978.201	938.258	973.685	1052.44	1040.9	1034.95	2002	0.0728	0.1164	0.1599	0.2188	0.4321	376.722	602.341	827.443	1132.24	2236.01		1	0	0	0	0		376.722		0.677		255.041
Guyana	1563.5	1661.15	1791.87	1936.35	2096.11	2193.69	2357.79	2493.71	2439.58	2500.1	2454.34	2498.87	2515.13	2479.99	2550.42	2487.71	2599.83	2488.8	2520.55	2586.47	2682.11	1998	0.0447	0.0978	0.1469	0.2156	0.495	599.451	1311.55	1970.01	2891.31	6638.21		1	0	0	0	0		599.451		0.484		290.134
Haiti									1145.3	1155.59	1146.01	1115.6	1095.17	1082.45	1029.15	1032.78	1041.67	1062.35	1057.47	1073.76	1002.14	2001	0.0238	0.0625	0.1036	0.1764	0.6337	119.255	313.169	519.108	883.887	3175.28		1	0	0	0	0		119.255		0.597		71.195
Honduras	2650.3	2661.54	2735.75	2830.28	2723.09	2765.45	2798.95	2873.91	2894.28	2780.43	2879.82	2898.07	2946.34	3018.8	3143.27	3267.56	3413.56	3553.59	3631.17	3472.92	3530.95	2009	0.0202	0.0612	0.1142	0.2051	0.5993	356.626	1080.47	2016.17	3620.99	10580.5		1	0	0	0	0		356.626		0.592		211.122
Hungary	13119.7	11560.1	11210.3	11158.4	11503	11690.6	11729.6	12120.8	12643.9	13085.2	13673.6	14213.7	14896.6	15514.5	16294.8	16974.6	17663.6	17711.2	17900.9	16709.8	16958.3							0	0	0	0	0		1	0	0	0	0		0		0.449		0
Iceland	25629.7	25277.7	24119.8	24189.4	24846.1	24740.5	25784.7	26830.9	28221.9	29024.2	29867.7	30629.1	30399.1	30924.2	33055.9	34889.2	35684.5	36875.4	36626	34106.1	32755.3							0	0	0	0	0		1	0	0	0	0		0		0.689		0
India	1216.63	1205.28	1246.87	1281.5	1341.57	1416.99	1496.8	1530.2	1596.96	1708.94	1745.21	1799.64	1838.24	1951.77	2074.47	2233.86	2406.34	2606.16	2671.68	2860.55	3121.62		0.0854	0.121	0.157	0.208	0.428	1332.93	1888.58	2450.47	3246.48	6680.26		1	0	0	0	0		1332.93		0.535		713.117
Indonesia	2072.59	2218.47	2338.39	2466.63	2610.05	2785.08	2952.53	3045.67	2607.55	2590.45	2678.99	2736.88	2819.23	2911.92	3014.9	3141.29	3267.09	3425.31	3580.59	3695.17	3873.13	2010	0.0763	0.1133	0.1557	0.2182	0.4365	1477.6	2194.13	3015.23	4225.59	8453.11		1	0	0	0	0		1477.6		0.63		930.888
Iran	6036.61	6665.55	6849.38	6664.3	6565.17	6649.58	7009.02	7118.63	7179.31	7188.92	7437.98	7601.75	8068.12	8539.28	8870.03	9172.94	9600.79	10232	10344.6	10404.5	10404.5	2005	0.0643	0.1091	0.1554	0.2196	0.4516	3345.06	5675.68	8084.33	11424.2	23493.5		1	0	0	0	0		3345.06		0.382		1277.81
Iraq								3212.61	4196.43	5077.42	4714.19	4274.52	3828.46	2184.86	3115.15	3013.85	2980.57	2950.5	3071.83	3171.25	3270.35	2007	0.087	0.1275	0.1669	0.2198	0.3988	1422.6	2084.85	2729.11	3594.11	6521.07		1	0	0	0	0		1422.6		0.356		506.446
Ireland											33188.7	34394.4	35726.3	36514.5	37417.1	38762	39893.8	41133.4	39640.6	37198.1	36785.9							0	0	0	0	0		1	0	0	0	0		0		0.525		0
Israel	17863.5	18115.4	18485	19000.3	19798.1	20535.2	21103.1	21276.3	21651.5	21815.5	23212.9	22621.5	22042.9	21975.8	22636.7	23340	24213.8	25095.1	25646.3	25250.2	26197.5							0	0	0	0	0		1	0	0	0	0		0		0.535		0
Italy	23730.9	24079.3	24263.7	24042.1	24554.2	25262.7	25542.1	26005	26374	26752.2	27717.1	28215.9	28254	28021.5	28226.9	28279.9	28737.7	29007.9	28453.6	26729.2	27059.1							0	0	0	0	0		1	0	0	0	0		0		0.442		0
Jamaica																7082.61					7082.61	2004	0.0535	0.0899	0.1349	0.2056	0.5161	1894.6	3183.63	4777.22	7280.92	18276.7		1	0	0	0	0		1894.6		0.555		1051.5
Japan	26522.6	27319.3	27474.8	27454	27596.9	28025.7	28683.5	29065	28410.9	28300.5	28889.2	28928.3	28944.6	29369.5	30052.7	30441.3	30960.8	31635.9	31322.7	29625.4	31029.7							0	0	0	0	0		1	0	0	0	0		0		0.571		0
Jordan	3291.53	2997.02	3377.52	3377.47	3410.47	3505.57	3471.11	3477.52	3474.19	3528.14	3588.79	3685.77	3805.62	3867.35	4098.5	4332.88	4578.94	4843.93	5082.05	5243.81	5248.54	2010	0.0771	0.1157	0.1567	0.2146	0.4359	2023.31	3036.28	4112.23	5631.69	11439.2		1	0	0	0	0		2023.31		0.371		750.649
Kazakhstan	7089.13	6270.01	5941.82	5431.08	4816.13	4499.36	4590.87	4743.26	4734.16	4908.51	5405.77	6145.99	6748.02	7350.81	8000.7	8699.1	9528.59	10258.6	10468.8	10318.3	10915.7	2009	0.0912	0.1315	0.1707	0.2225	0.3841	4977.54	7177.05	9316.52	12143.7	20963.5		1	0	0	0	0		4977.54		0.674		3354.86
Kenya	1421.11	1394.53	1339.18	1302.19	1296.56	1315.01	1332.21	1303.51	1312.01	1308.07	1281.99	1295.61	1268.19	1270.55	1299.77	1339.96	1387.12	1445.02	1428.45	1428.78	1471.08		0.0484	0.0868	0.132	0.201	0.532	356.002	638.45	970.915	1478.44	3913.08		1	0	0	0	0		356.002		0.603		214.669
Kiribati	1881.46	1767.8	1796.97	1835.41	1900.97	1857.09	1941.87	2018.43	2203.89	2170.32	2336.14	2311.44	2283.12	2332.4	2364.05	2319.97	2179.61	2307.11	2334.88	2284.66	2239.02							0	0	0	0	0		1	0	0	0	0		0				0
Kuwait						42714.2	42996.5	42693	42041.1	39104.7	39054.2	37861.8	37710	42817.3	45463.7	48096.5	48062.2	47464.7	47107.8	42363.4	39403.1							0	0	0	0	0		1	0	0	0	0		0		0.665		0
Kyrgyzstan	2523.49	2287.65	1947.33	1645.81	1315.71	1231.99	1299.89	1408.09	1416.07	1446.19	1506.62	1571.81	1557.18	1649.27	1743.93	1721.34	1755.78	1887.68	2026.93	2060.4	2026.37							0	0	0	0	0		1	0	0	0	0		0		0.606		0
Laos	932.528	944.681	968.85	997.733	1050.68	1096.78	1145.69	1197.97	1220.55	1285.69	1337.49	1393.24	1455.73	1523.76	1597.87	1684.39	1796.9	1895.68	2002.11	2108.07	2242.12		0.0764	0.113	0.153	0.209	0.448	856.491	1266.8	1715.22	2343.02	5022.35		1	0	0	0	0		856.491		0.765		655.215
Latvia	10108.7	8877.43	6109.67	5920.84	6152.62	6182.02	6489.05	7096.91	7502.49	7919.24	8529.2	9285.58	9955.87	10733.2	11727.8	13040.5	14716.1	16268.7	15647.1	12901.8	12948.3							0	0	0	0	0		1	0	0	0	0		0		0.48		0
Lebanon	6257.49	8492.52	8656.43	9009.98	9489.69	9914	10295.7	9989.55	10277.7	10092.7	9979.67	9996.58	9869.42	9707.09	9990.49	9753.06	9588.08	10157.9	10977.1	11739.5	12288.8		0.0703333	0.111533	0.156867	0.219767	0.4415	4321.57	6853.07	9638.54	13503.4	27127.6		1	0	0	0	0		4321.57		0.425		1836.67
Lesotho	930.53	948.829	997.775	1010.86	1045.35	1048.78	1087.72	1118.03	1125.09	1118.56	1165.53	1204.9	1202.33	1249.94	1269.72	1294.7	1340.32	1392.74	1460.33	1499.39	1602.04	2003	0.0297	0.0721	0.1252	0.2095	0.5635	237.903	577.536	1002.88	1678.14	4513.75		1	0	0	0	0		237.903		0.499		118.714
Liberia	359.502	313.857	207.493	140.619	109.319	101.598	107.803	206.629	247.799	284.144	338.617	398.712	513.558	339.034	315.606	336.532	356.89	396.762	420.584	459.842	492.56	2007	0.064	0.114	0.157	0.216	0.45	157.619	280.759	386.66	531.965	1108.26		1	0	0	0	0		157.619		0.589		92.8377
Libya										12502.7	12756.8	12016.8	11679.1	12997.3	13361.2	14454.4	15059.5	15699.1	16033.1	16129.5	16129.5		0.0735167	0.11665	0.16005	0.219933	0.43	5928.95	9407.55	12907.7	17737.1	34678.5		1	0	0	0	0		5928.95		0.488		2893.33
Lithuania	12499.7	11770.2	9278.08	7809.48	7095.88	7385.97	7828.05	8475.04	9187.91	9154.02	9518.31	10212.7	10952.1	12126.3	13088.2	14197.3	15402.3	17010.4	17599.6	15088.9	15534.5							0	0	0	0	0		1	0	0	0	0		0		0.483		0
Luxembourg	42706.9	45781.2	45999.1	47292.2	48435.1	48443.5	48512.7	50753	53379.4	57097.8	61091.2	61888.3	63748.2	64027.1	65882.4	68290.3	70527.1	74021.5	72176	66915.1	67742.5							0	0	0	0	0		1	0	0	0	0		0		0.545		0
Macedonia	8097.09	7616	7157.9	6670.37	6586.88	6519.55	6569.43	6608.89	6759.46	6978.69	7233.43	6862.72	6890.12	7062.31	7371.88	7676.83	8048.55	8531.96	8945.12	8855.26	9104.28							0	0	0	0	0		1	0	0	0	0		0		0.378		0
Madagascar	1012.72	920.709	903.855	895.073	867.277	855.06	846.373	850.281	856.172	868.318	881.803	906.599	768.033	818.286	836.182	849.467	866.745	894.934	931.989	868.72	849.119	2010	0.0541	0.0948	0.1409	0.2088	0.5014	229.687	402.483	598.205	886.48	2128.74		1	0	0	0	0		229.687		0.858		197.071
Malawi	567.587	603.694	553.584	604.683	539.947	623.169	656.299	664.758	671.552	672.345	664.315	614.881	609.415	626.545	639.677	639.74	634.15	673.772	708.043	748.97	657.73	2010	0.056	0.095	0.14	0.207	0.502	184.164	312.422	460.411	680.75	1650.9		1	0	0	0	0		184.164		0.768		141.438
Malaysia	6873.68	7329.04	7774.48	8328.54	8868.38	9496.24	10183.5	10655.6	9628.85	9978.36	10619	10448.7	10791.8	11197.8	11733.7	12130.6	12572.8	13122.1	13510	13071.9	13801.4	2009	0.0454	0.0865	0.1372	0.2164	0.5154	3132.91	5969.09	9467.73	14933.1	35566.1		1	0	0	0	0		3132.91		0.571		1788.89
Maldives												4518.59	4710.74	5286.77	5846.77	5248.57	6167.74	6699.07	7382.05	6984.25	7338.73	2004	0.0651	0.1088	0.1571	0.2266	0.4442	2388.76	3992.27	5764.57	8314.78	16299.3		1	0	0	0	0		2388.76		0.58		1385.48
Mali	724.249	720.89	762.922	728.004	715.849	740.892	745.391	775.595	801.21	832.461	835.382	909.672	919.603	958.351	949.408	976.066	1026.75	1037.22	1054.65	1067.46	1095.12		0.0797	0.1199	0.1633	0.2241	0.413	436.405	656.524	894.165	1227.08	2261.42		1	0	0	0	0		436.405		0.604		263.589
Malta	13674.1	14385.2	14912.7	15433.7	16162.5	17071.9	17609.6	18409.5	19236.2	20046.2	21291	20338.9	20755.4	20646.6	20405.2	21018.6	21350.1	22119.9	22922.6	22204.5	22696.8							0	0	0	0	0		1	0	0	0	0		0		0.473		0
Mauritania	1737.86	1720.31	1703.78	1753.08	1651.11	1761.23	1809.9	1686.24	1710.91	1788.57	1728.03	1710.13	1670.03	1717.22	1762.57	1865.26	2154.53	2128.61	2143.69	2061.42	2110.19		0.0602	0.104	0.151	0.215	0.47	635.166	1097.3	1593.19	2268.45	4958.94		1	0	0	0	0		635.166		0.369		234.376
Mauritius	6104.29	6306.6	6629.52	6884.34	7069.41	7309.4	7639.31	7973.33	8368.9	8478.92	9153.88	9287.67	9403.12	9646.42	10113.2	10157.5	10478.9	11028.2	11561.2	11848.4	12278.6		0.0532	0.09475	0.13915	0.2049	0.508	3266.11	5817	8542.85	12579.5	31187.7		1	0	0	0	0		3266.11		0.542		1770.23
Mexico	10023.4	10231.1	10381.8	10579.9	10856.5	10032.8	10424.5	10951.2	11271.4	11386.7	11810.1	11575.2	11440.2	11459.9	11807.3	12017.1	12462.2	12694.6	12711.3	11962.5	12412.5		0.0493	0.0879	0.133	0.202	0.528	3059.68	5455.28	8254.3	12536.6	32768.9		1	0	0	0	0		3059.68		0.579		1771.55
Moldova	4583.06	3839.38	2719.92	2690.18	1864.45	1847.8	1755.23	1787.26	1674.23	1619.87	1657.25	1762.28	1904.15	2035.54	2191.8	2361.95	2481.63	2563.93	2768.27	2605.75	2793.38							0	0	0	0	0		1	0	0	0	0		0		0.38		0
Mongolia	2444.16	2197.69	1971.52	1892.43	1918.16	2024.89	2053.59	2116.14	2168.35	2215.57	2221.07	2265.68	2350.03	2488.8	2722.75	2885.28	3091.78	3361.9	3608.6	3510.31	3677.98	2008	0.071	0.1115	0.1562	0.2209	0.4404	1305.68	2050.47	2872.5	4062.33	8098.91		1	0	0	0	0		1305.68		0.572		746.851
Montenegro								7485.53	7863.42	7131.02	7354.13	7431.03	7562.33	7737.19	8061.57	8384.47	9090.27	10047.5	10726.1	10102.3	10343.7							0	0	0	0	0		1	0	0	0	0		0		0.408		0
Morocco	2698.7	2832.51	2671.05	2599.88	2823.08	2596.5	2870.1	2765.65	2936.32	2913.48	2923.98	3109.24	3178.23	3344.91	3471.35	3540.42	3779.25	3845.37	4020.92	4167.55	4268.03		0.0652	0.105	0.145	0.206	0.479	1391.38	2240.71	3094.32	4396.07	10221.9		1	0	0	0	0		1391.38		0.455		633.076
Mozambique	395.041	404.687	371.801	389.257	400.525	397.75	414.681	444.944	480.529	506.478	498.626	542.806	574.334	591.969	626.075	661.864	684.895	715.412	744.424	771.296	805.048							0	0	0	0	0		1	0	0	0	0		0		0.783		0
Myanmar																					5507.1		0.0677143	0.107914	0.1523	0.217694	0.454514	1864.55	2971.47	4193.66	5994.32	12515.3		1	0	0	0	0		1864.55		0.752		1402.14
Namibia	3985.3	4161.93	4321.1	4109.97	4283.36	4329.11	4333.59	4381.07	4395.94	4428.13	4484.08	4458.71	4607.69	4747.42	5271.26	5341.32	5646.95	5871.02	5982.73	5827.26	6092.03		0.0315	0.0503	0.0824	0.15	0.686	959.494	1532.14	2509.91	4569.02	20895.6		1	0	0	0	0		959.494		0.477		457.679
Nepal	747.246	775.217	786.656	796.023	839.361	846.464	869.268	890.711	895.725	914.033	950.019	975.796	958.821	979.471	1009.03	1028.85	1049.28	1071.87	1124.33	1162.21	1204.53	2010	0.0827	0.122	0.162	0.219	0.415	498.071	734.761	975.666	1318.96	2499.39		1	0	0	0	0		498.071		0.813		404.932
Netherlands	26275.8	26705.4	26956.4	27105.8	27740.7	28464.1	29298.3	30394.9	31393.3	32645.9	33690.8	34081.4	33890.4	33844.1	34481	35104.5	36237.8	37576.7	38105.9	36520.1	36888.3							0	0	0	0	0		1	0	0	0	0		0		0.618		0
New Zealand	19515.5	18388.9	18399.9	19349.2	20050.6	20584.1	20918.5	21207.2	21295.3	22267.9	22636.8	23309.7	24027.1	24474.3	24960.1	25473.8	25590.5	26228.3	25498	25458.6	25215							0	0	0	0	0		1	0	0	0	0		0		0.632		0
Nicaragua	2437.09	2375.4	2326.81	2261.43	2282.17	2364	2462.62	2511.39	2558.16	2692.47	2759.04	2799.15	2781.62	2814.58	2926.44	3013.21	3098.72	3213.49	3299.16	3184.95	3255.62	2005	0.0622	0.1021	0.1479	0.2154	0.4724	1012.5	1661.99	2407.53	3506.3	7689.77		1	0	0	0	0		1012.5		0.576		583.198
Niger	704.772	699.843	633.18	621.136	624.192	618.427	617.184	611.645	651.183	624.232	593.394	612.875	608.774	618.192	596.662	601.052	612.861	609.099	643.013	614.856	641.547	2008	0.0809	0.1183	0.1577	0.2125	0.4306	259.506	379.475	505.86	681.644	1381.25		1	0	0	0	0		259.506		0.614		159.337
Nigeria	1286	1245.9	1220.12	1214.8	1195.62	1162.57	1190.52	1193.67	1195.79	1171.74	1203.48	1225.37	1240.06	1334.12	1738.95	1752.63	1847.19	1921.4	1987.59	2068.33	2170.06		0.044	0.083	0.13	0.203	0.54	477.413	900.574	1410.54	2202.61	5859.15		1	0	0	0	0		477.413		0.514		245.39
North Korea																					13875.3		0.0634667	0.112167	0.166767	0.225367	0.4389	4403.11	7781.75	11569.7	15635.2	30449.4		1	0	0	0	0		4403.11				0
Norway	32362.7	33209.1	34181.3	34925.3	36481.2	37811.6	39539	41445.8	42305.1	42867.5	43975.9	44624.7	45051.4	45227.2	46741.6	47626.3	48330.3	49101.8	48526.4	47134.8	46773.9							0	0	0	0	0		1	0	0	0	0		0		0.633		0
Oman	15131	15412	16024.1	16341.2	16448.8	16907.1	17250.8	18277.1	18817	18783.6	19615.3	20645.1	20538.8	19904.5	19955.8	20273	21115.2	22420.9	25058.9	24671.5	24753.1		0.0718	0.113	0.153	0.21	0.453	8886.37	13985.5	18936.1	25990.8	56065.8		1	0	0	0	0		8886.37		0.548		4869.73
Pakistan	1631.13	1666.61	1748.17	1733.88	1753.31	1793.27	1831.13	1801.05	1799.28	1819.48	1854.11	1851.92	1875.41	1931.13	2036.92	2153.95	2245.3	2310.41	2306.39	2328.67	2324.34		0.096	0.129	0.164	0.212	0.4	1115.68	1499.2	1905.95	2463.8	4648.67		1	0	0	0	0		1115.68		0.512		571.229
Palestine																					6949.72							0	0	0	0	0		1	0	0	0	0		0				0
Panama	5899.54	6322.09	6700.8	6922.69	6975.26	6952.82	7002.14	7302.09	7678.34	7817.64	7869.24	7758	7776.11	7947.24	8383.29	8819.04	9396.41	10345.9	11192.4	11423.5	12067	2010	0.033	0.0775	0.1251	0.2006	0.5638	1991.05	4675.96	7547.9	12103.2	34016.8		1	0	0	0	0		1991.05		0.612		1218.52
Papua New Guinea	1688.85	1804.99	2004.5	2310.58	2386.35	2248.51	2359.8	2208.45	2069.55	2053.08	1950.4	1898.71	1848.37	1841.83	1845.78	1865.89	1868.19	1955.17	2037.36	2100.07	2217.11	1996	0.0452	0.0774	0.121	0.193	0.564	501.067	858.021	1341.35	2139.51	6252.25		1	0	0	0	0		501.067		0.707		354.254
Paraguay	4537.79	4577.19	4539.72	4648.96	4781.08	4990.13	4955.29	5052.8	4948.38	4778.7	4572.2	4442.42	4353.18	4452.58	4544.48	4554.3	4685.45	4850.37	5067.22	4780.88	5312.81	2010	0.0326	0.0776	0.1277	0.1978	0.5643	865.988	2061.37	3392.23	5254.37	14990.1		1	0	0	0	0		865.988		0.659		570.686
Peru	4459.11	4465.18	4360.4	4482.65	4964.98	5296.03	5334.31	5602.99	5474.05	5436.81	5513.57	5447.42	5644.37	5797.48	6012.6	6349.05	6765.48	7288.07	7916.48	7904.27	8502.61	2010	0.0391	0.0834	0.1363	0.2153	0.5259	1662.26	3545.59	5794.53	9153.06	22357.6		1	0	0	0	0		1662.26		0.729		1211.79
Philippines	2538.4	2462.98	2413.5	2408.24	2457.25	2514.72	2602.72	2677.64	2604.5	2627.38	2685.56	2705.93	2747.22	2826.12	2957.18	3041.06	3143.89	3295	3375.03	3357.5	3553.5	2010	0.0598	0.0942	0.1387	0.2104	0.4969	1062.5	1673.7	2464.35	3738.28	8828.68		1	0	0	0	0		1062.5		0.6		637.498
Poland	8182.09	7581.14	7748	8017.22	8423.76	8997.15	9551.21	10221.3	10726.7	11212.9	11753.4	11959	12137.2	12615.1	13297.1	13784.2	14651.8	15654.5	16454.8	16706.8	17372.3							0	0	0	0	0		1	0	0	0	0		0		0.505		0
Portugal	16177.4	16910	17090.7	16720.3	16845.3	17520.7	18117.3	18853.4	19747.5	20465.6	21154.9	21431.9	21438.7	21095.5	21300.4	21369	21606.9	22068	22036.9	21375.7	21779.6							0	0	0	0	0		1	0	0	0	0		0		0.552		0
Qatar											64529.8	64703	67344.1	66475.7	73624.4	69497.7	69949.6	69300.9	69164.8	67313.1	70239.3		0.07565	0.1183	0.16115	0.21925	0.4252	26568	41546.6	56595.3	76999.8	149329		1	0	0	0	0		26568		0.86		22848.5
Romania	7852.7	6899.38	6346.53	6451.22	6717.1	7212.62	7523.41	7084.64	6759.33	6688.71	6838.02	7329.35	7819.33	8249.06	8965.53	9361.41	10122.8	10750.5	11620.6	10873.2	10715.1							0	0	0	0	0		1	0	0	0	0		0		0.52		0
Russia	12625.6	11961.6	10219	9343.79	8179.43	7850.84	7588.8	7717.77	7328.87	7829.37	8612.66	9073.13	9546.04	10292.1	11088.2	11852.8	12877.7	14016.2	14767.3	13616.2	14181.6							0	0	0	0	0		1	0	0	0	0		0		0.583		0
Rwanda	707.105	713.151	804.471	797.589	420.216	574.717	618.93	645.729	634.398	623.103	631.319	657.507	727.447	726.793	766.51	820.176	868.985	910.144	982.551	1013.49	1055.87		0.046	0.0787	0.115	0.174	0.586	242.849	415.483	607.122	918.603	3093.68		1	0	0	0	0		242.849		0.857		208.122
Saint Lucia	7562.79	7655.67	8090.77	8203.11	8224.05	8391.73	8732.19	8649.45	9074.44	9168.25	9118.87	8588.42	8513.87	8807.5	9448.09	9160.1	9876.8	9877.75	10247.9	10117.1	10032	1995	0.0523	0.0987	0.1481	0.2175	0.4834	2623.37	4950.79	7428.69	10909.8	24247.3		1	0	0	0	0		2623.37				0
Saint Vincent and the Grenadines	5426.49	5444.62	5843.95	5847.95	5670.65	5727.82	5806.95	6582.5	6928.16	7236.29	7194.33	7306.75	7752.62	8325.02	8654.73	8852.59	9517.82	9828.35	9954.7	9729.69	9452.86		0.0523	0.0987	0.1481	0.2175	0.4834	2471.92	4664.99	6999.85	10280	22847.6		1	0	0	0	0		2471.92				0
Samoa	2595.75	2517.38	2489.66	2566.34	2477.69	2618.86	2791.02	2798.5	2852.46	2904.46	3093.27	3294.65	3419.92	3560.96	3708.29	3837.69	3889.21	3933.86	4076.09	3841.82	3829.72		0.062	0.0987	0.141	0.203	0.496	1187.21	1889.97	2699.95	3887.16	9497.7		1	0	0	0	0		1187.21				0
São Tomé and Príncipe												1318.24	1319.67	1379.82	1410.19	1398.23	1432.4	1420	1504.09	1519.56	1543.66	2001	0.0523	0.085	0.1223	0.1769	0.5653	403.668	656.057	943.951	1365.37	4363.17		1	0	0	0	0		403.668				0
Saudi Arabia	18973	20040.1	20331.6	19770.6	19422.2	19073	19424.5	19705.9	20031.1	19538.9	19956.5	19348.3	18544.4	19178.6	19969.5	20680.4	21246.9	22047.6	23496.9	23542.8	24864.4		0.07325	0.115225	0.158725	0.21835	0.434225	9106.57	14325	19733	27145.7	53983.6		1	0	0	0	0		9106.57		0.487		4434.9
Senegal	1427.55	1419.54	1393.77	1370.13	1330.91	1364.35	1356.18	1364.4	1410.45	1463.98	1473.57	1501.87	1472.28	1528.96	1575.33	1619.13	1614.29	1648.18	1662.27	1655.47	1677.62		0.0622	0.1061	0.1532	0.2197	0.4588	521.739	889.976	1285.06	1842.86	3848.45		1	0	0	0	0		521.739		0.687		358.435
Serbia	11601.9	10453.7	7563.82	5220.11	5326.17	5647.89	6112.21	6781.66	6903.03	6152.12	6501.34	6857.69	7143.65	7353.77	8056.45	8517.05	8858.43	9374.71	9772.47	9468.32	9602.43							0	0	0	0	0		1	0	0	0	0		0		0.419		0
Seychelles	13932.2	14164	14988.9	15685.2	15304.6	14931	15404.8	17048.1	18121.3	18110.1	18703.7	18262.9	17948	16995.3	16634.4	18045	19345.6	21252.2	20337.4	20033.4	20640	2007	0.0371	0.0566	0.0832	0.1268	0.6963	3828.72	5841.12	8586.25	13085.8	71858.2		1	0	0	0	0		3828.72				0
Sierra Leone	984.73	1005.26	818.478	838.105	830.079	768.428	783.38	735.725	742.515	715.436	742.883	664.801	802.559	836.931	851.711	855.336	876.156	923.007	951.748	963.684	996.548		0.0609	0.0965	0.1404	0.2093	0.4929	303.449	480.835	699.577	1042.89	2455.99		1	0	0	0	0		303.449		0.649		196.938
Singapore	25234	26115.5	27124.6	29482.7	31594.6	32879.6	33977.7	35651.4	33712.5	35516.7	38063.1	36622.6	37814.2	40134.4	43264.6	45374.2	47768.4	49952.3	48191.3	46391.4	52313.9							0	0	0	0	0		1	0	0	0	0		0		0.651		0
Slovakia	12692.6	10834.4	10102.9	9692.01	10253	10820.4	11547	12037.6	12545.7	12537.7	12726.5	13193.7	13797.9	14455.3	15178.4	16174.8	17510.4	19326.7	20402.9	19353.9	20120.7							0	0	0	0	0		1	0	0	0	0		0		0.505		0
Slovenia	16454.7	14980.7	14183	14621.1	15417.8	15976	16569.1	17413.9	18065.3	19013.8	19766.3	20315.3	21066.6	21670.8	22610.2	23475.6	24769.6	26323.7	27225.5	24819.9	25052.9							0	0	0	0	0		1	0	0	0	0		0		0.55		0
Solomon Islands	2322.29	2393.31	2621.68	2649.6	2812.34	2959.01	2923.48	2802.34	2774.66	2686.76	2241.9	2008.51	1901.32	1972.93	2017.63	2074.98	2166.32	2342.55	2456.69	2373.36	2484.11		0.0452	0.0774	0.121	0.193	0.564	561.408	961.35	1502.89	2397.16	7005.18		1	0	0	0	0		561.408		0.634		355.933
Somalia																					1467		0.0629	0.105	0.149	0.212	0.472	461.372	770.175	1092.92	1555.02	3462.12		1	0	0	0	0		461.372		0.518		238.99
South Africa	7974.71	7732.46	7410.96	7345.61	7422.84	7490.39	7641.05	7665.86	7526.47	7520.2	7641	7690.99	7863.9	7993.43	8259.3	8596.83	8977.29	9371.99	9604.82	9357.13	9516.45		0.027	0.0463	0.0816	0.163	0.682	1284.72	2203.06	3882.71	7755.91	32451.1		1	0	0	0	0		1284.72		0.387		497.187
South Korea	8768.5	9503.69	9971.07	10488.3	11281.9	12141.6	12868	13340.8	12337	13411.7	14428.8	14891.6	15867.5	16231.5	16917.6	17550.9	18370.5	19218.6	19519.4	19489	20625.1	1998	0.0791	0.1356	0.1795	0.2313	0.3745	8157.23	13983.8	18511	23852.9	38620.5		1	0	0	0	0		8157.23				0
Spain	19776.7	20234	20354.8	20082.3	20505.6	21021.8	21480.2	22252.5	23165.6	24140.3	25147.1	25777.1	26095.4	26459.3	26882	27392	28044.4	28527.1	28353.9	27057.7	26908							0	0	0	0	0		1	0	0	0	0		0		0.472		0
Sri Lanka	2029.22	2091.58	2163.69	2284.14	2379.03	2475.97	2542.02	2671.05	2764.39	2842.12	3005.39	3006.96	3105.69	3246.93	3377.57	3550.21	3781.26	4001.79	4202.57	4301.72	4600.87	2010	0.0772	0.1139	0.1533	0.2097	0.4459	1775.94	2620.2	3526.57	4824.02	10257.6		1	0	0	0	0		1775.94		0.523		928.815
Sudan	993.777	1037.57	1072.62	1087.44	1065.4	1096.52	1129.02	1214.48	1232.99	1237.22	1279.95	1325.5	1371.37	1435.96	1449.7	1514.37	1619.81	1755.51	1757.83	1764.95	1777.48		0.0681	0.1165	0.164	0.2273	0.4241	605.233	1035.38	1457.54	2020.11	3769.15		1	0	0	0	0		605.233		0.455		275.381
Suriname	5323.9	5390.91	5305.31	4855.2	4947.07	4934.66	4930.14	5142.68	5152.36	5037.62	4964.55	5117.73	5262.33	5501.05	5930.72	6125.71	6289.76	6543.3	6749.11	6888.34	7113.61	1999	0.0318	0.0723	0.1231	0.2035	0.5693	1131.06	2571.57	4378.42	7238.09	20248.9		1	0	0	0	0		1131.06		0.473		534.993
Swaziland	3895.17	3854.2	3887.84	3929.5	3947.13	4055.13	4120.78	4154.72	4172.02	4215.4	4226.83	4231.83	4277.5	4350.22	4448.74	4517.54	4609.93	4701.14	4732.94	4712.22	4721.84	2010	0.0405	0.0773	0.12	0.2	0.566	956.172	1824.99	2833.1	4721.84	13362.8		1	0	0	0	0		956.172		0.437		417.847
Sweden	24564.9	24118.4	23699.6	23075.6	23831.6	24640.5	24998	25660.3	26724.5	27948	29145.5	29434.3	30067.2	30655.2	31828	32703	33917	34782.2	34300.6	32299.7	34125.3							0	0	0	0	0		1	0	0	0	0		0		0.58		0
Switzerland	34418.7	33679.9	33296.1	32952.7	33106.1	33043.8	33057.6	33651.5	34469.1	34784	35858.9	36075.7	35870.2	35612.5	36224.9	36963.6	38110.4	39223.9	39566.8	38318.7	39041.6							0	0	0	0	0		1	0	0	0	0		0		0.648		0
Syria	2937.36	3078.76	3395.56	3472.73	3635.84	3739.63	3796.13	3756.9	3886.66	3653.75	3667.88	3782.45	3936.39	3890.46	4070.08	4205.52	4266.08	4334.85	4355.24	4466.08	4501.74	2004	0.0768	0.1143	0.1553	0.2143	0.4393	1728.67	2572.74	3495.6	4823.61	9888.06		1	0	0	0	0		1728.67		0.398		688.009
Tajikistan	3008.52	2732.86	1903.22	1564.58	1212.79	1047.4	860.871	864.472	898.82	919.577	981.173	1063.51	1157.25	1259.86	1361.62	1422.59	1489.59	1573.35	1660.86	1679.45	1746.42	2009	0.0829	0.1275	0.1701	0.2258	0.3937	723.892	1113.34	1485.33	1971.71	3437.83		1	0	0	0	0		723.892		0.594		429.992
Tanzania	858.426	847.904	824.771	807.468	794.496	798.813	812.482	819.726	829.379	848.493	868.498	897.569	937.455	976.049	1024.52	1070.07	1110.26	1155.62	1205.45	1240.44	1288.5		0.068	0.111	0.1565	0.217	0.448	438.091	715.119	1008.25	1398.03	2886.25		1	0	0	0	0		438.091		0.866		379.387
Thailand	3967.39	4261.62	4568.02	4910.14	5312.85	5755.14	6035.61	5889.08	5209.9	5378.03	5568.41	5623.63	5855.02	6205.9	6538.86	6790.7	7101.4	7437.83	7610.12	7422.5	7987.18	2010	0.0676	0.105	0.1462	0.2145	0.4667	2699.67	4193.27	5838.63	8566.25	18638.1		1	0	0	0	0		2699.67		0.717		1935.66
The Bahamas	28945.7	27229.2	25696	25298.9	25649.5	26368.2	27130.4	27384.2	28371.1	30033.7	30826.4	31088	31305.4	30264.6	29890.1	30276.9	30434.7	30294.8	29056.3	27359.9	27169.9		0.0391	0.08465	0.1301	0.2002	0.54595	5311.72	11499.7	17674	27197.1	74167.1		1	0	0	0	0		5311.72				0
The Gambia	1604.93	1597.86	1600.94	1602.42	1561.02	1531.69	1522.63	1553.22	1562.81	1615.63	1654.94	1698.64	1593.15	1649.73	1710.99	1642.24	1609.41	1616.51	1656.59	1708.91	1763.78		0.0479	0.0856	0.132	0.206	0.528	422.425	754.898	1164.09	1816.69	4656.38		1	0	0	0	0		422.425				0
Timor-Leste										932.66	1053.4	1200.58	1085.3	1023.01	991.247	1038.75	974.711	1055.08	1173.71	1285.2	1367.26		0.0763	0.1133	0.1557	0.2182	0.4365	521.608	774.551	1064.41	1491.68	2984.04		1	0	0	0	0		521.608		0.371		193.517
Togo	933.91	903.492	846.271	701.437	787.422	828.784	879.903	981.36	934.633	933.531	902.65	865.292	835.319	854.151	849.807	837.743	849.366	846.639	843.41	850.715	862.041		0.0762	0.1174	0.1609	0.2215	0.424	328.438	506.018	693.512	954.71	1827.53		1	0	0	0	0		328.438		0.746		245.014
Tonga	2980.63	3166.65	3170.57	3285.06	3442.28	3562.01	3551.64	3533.89	3614.36	3736.71	3842.72	3959.22	4070.54	4132.97	4147.71	4219.59	4124.9	3928.25	3938.37	4041.95	4154.85		0.062	0.0987	0.141	0.203	0.496	1288	2050.42	2929.17	4217.17	10304		1	0	0	0	0		1288				0
Trinidad and Tobago	10767.1	10983.9	10736.8	10522.4	10845.7	11232.5	11644.6	11937.6	12846	13386.1	14171.3	14701	15812.2	18007.9	19332.5	20343.6	23023.4	23997.2	24690.3	23497.6	23447.8	1992	0.0551	0.1033	0.1553	0.2274	0.4589	6459.86	12110.8	18207.2	26660.1	53800.9		1	0	0	0	0		6459.86		0.6		3875.92
Tunisia	4467.54	4550.57	4806.56	4816.78	4880.8	4916.33	5191.28	5399.06	5585.64	5847.02	6053.52	6278.4	6320.9	6632.59	6971.97	7182.37	7492.73	7892.37	8173.72	8333.68	8494.59	2010	0.0674	0.1154	0.1623	0.2275	0.4292	2862.68	4901.38	6893.36	9662.6	18229.4		1	0	0	0	0		2862.68		0.41		1173.7
Turkey	8108.6	8030.67	8298.46	8791.96	8250.56	8762.33	9263.31	9811.75	9885.01	9408.76	9898.15	9199.39	9627.94	9994.09	10781.5	11532.5	12168.8	12577.4	12504.3	11754.2	12671.1	2010	0.0553	0.1056	0.1557	0.2235	0.4599	3503.56	6690.35	9864.46	14160	29137.2		1	0	0	0	0		3503.56		0.427		1496.02
Turkmenistan	6114.92	5671.95	4686.89	4626.17	3729.08	3384.15	3543.47	3090.06	3264.8	3757.22	3916.94	4041.88	4009.63	4098.06	4258.23	4761.85	5224.93	5735.01	6498.73	6810.09	7343.65	1998	0.0614	0.1015	0.1473	0.2151	0.4747	2254.5	3726.9	5408.6	7898.1	17430.2		1	0	0	0	0		2254.5		0.537		1210.67
Uganda	567.959	578.99	578.629	606.097	624.012	673.788	712.018	725.396	737.732	772.484	771.553	785.269	825.691	849.823	877.319	901.767	965.849	1012.43	1064.24	1103.7	1129.8		0.0584	0.0964	0.1376	0.2003	0.5073	329.9	544.562	777.299	1131.49	2865.73		1	0	0	0	0		329.9		0.745		245.776
Ukraine	8062.6	7369.08	6635.24	5688.15	4405.42	3898.65	3540.06	3465.29	3429.97	3455.54	3696.44	4077.3	4332.16	4777.99	5396.92	5583.4	6031.63	6547.08	6734.03	5762.92	6028.87							0	0	0	0	0		1	0	0	0	0		0		0.539		0
United Arab Emirates	73588.8	70273.2	68836.5	66150.1	67195.1	68201.4	68520	70205.7	66715.5	65326.7	69241	67839.2	67510	70283.9	70916.2	65573.1	61326.4	53233.5	46889	40637.1	36480.4		0.0643	0.1091	0.1554	0.2196	0.4516	11728.5	19900.1	28345.3	40055.5	82372.8		1	0	0	0	0		11728.5		0.75		8796.34
United Kingdom	22421.3	22063.2	22288.5	23011.2	24089.7	24875	25678	26726.1	27598.9	28315.3	29445.1	29978.8	30554.3	31632.6	32471.9	33323.9	34032.2	34972.9	34473.8	32470.5	32765.5							0	0	0	0	0		1	0	0	0	0		0		0.57		0
United States	32965.4	32504.2	33196.2	33660.6	34592.5	35112.3	36023.6	37189.7	38394.3	39795.5	40965	40946.4	41288.8	42077.9	43273.7	44313.6	45058.6	45431	44872.7	43234.5	43952.4							0	0	0	0	0		1	0	0	0	0		0		0.574		0
Uruguay	7299.55	7504.79	8041.7	8195.12	8727.66	8539.57	8951.49	9648.41	10019.7	9774.28	9551.13	9167.63	8456.91	8530.37	8961.52	9626.21	10005.5	10633.9	11361.3	11576.5	12569.1							0	0	0	0	0		1	0	0	0	0		0		0.61		0
Uzbekistan	2002.21	1950.33	1691.76	1615.71	1501.92	1461.75	1458.44	1505.62	1545.29	1594.46	1632.3	1679.47	1725.4	1777.06	1891.94	2000.97	2121	2289.67	2455.99	2610.5	2753.56	2003	0.0714	0.1152	0.1567	0.2148	0.4419	983.021	1586.05	2157.41	2957.32	6083.99		1	0	0	0	0		983.021		0.539		529.848
Vanuatu	3463.23	3473.73	3461.32	3387.54	3595.45	3544.89	3552.14	3658.48	3750.06	3694.73	3835.04	3618.6	3351.05	3407.06	3452.87	3544.97	3750.42	3848.66	3998.82	4033.81	4004.83		0.062	0.0987	0.141	0.203	0.496	1241.5	1976.39	2823.41	4064.91	9931.99		1	0	0	0	0		1241.5				0
Venezuela	9578.43	10261.9	10635.1	10428.2	9963.63	10139.1	9910.58	10329.8	10156.1	9365.37	9526.64	9666.66	8649.53	7835.35	9104.38	9869.17	10658	11396.1	11799.4	11236.7	10894							0	0	0	0	0		1	0	0	0	0		0		0.593		0
Vietnam	1013.96	1054.82	1125.8	1195.82	1279.83	1379.13	1484	1580.14	1645.77	1698.66	1789.78	1876.69	1972.29	2084	2214.39	2353.88	2490.34	2639.13	2759.03	2877.44	3030.3	2008	0.0742	0.1152	0.1581	0.2184	0.4341	1124.24	1745.45	2395.45	3309.09	6577.26		1	0	0	0	0		1124.24		0.749		842.056
Yemen	1836.73	1858.64	1909.96	1887.14	1920.28	1945.18	1962.12	1999.38	2058.55	2077.17	2144.27	2163.19	2185.16	2204.05	2229.52	2292.59	2305.52	2323.95	2350.85	2383.95	2507.41		0.0718	0.113	0.153	0.21	0.453	900.16	1416.69	1918.17	2632.78	5679.28		1	0	0	0	0		900.16		0.395		355.563
Zambia	1251.05	1220.46	1171.46	1222.34	1090.69	1034.04	1077.59	1083.67	1034.94	1029.82	1038.41	1061.78	1069.83	1096.9	1127.19	1156.82	1196.58	1235.91	1274.16	1312.35	1370.47		0.0358	0.0663	0.104	0.175	0.622	245.315	454.312	712.646	1199.16	4262.17		1	0	0	0	0		245.315		0.691		169.512
Zimbabwe	678.552	697.99	620.708	614.392	658.339	647.442	702.052	708.92	718.418	703.612	675.6	680.801	617.593	511.331	480.878	452.789	436.644	420.169	344.742	362.4	391.55		0.0463	0.0814	0.122	0.193	0.557	90.6439	159.361	238.846	377.846	1090.47		1	0	0	0	0		90.6439		0.827		74.9625

## Sheet: Results_15+
	1990	1991	1992	1993	1994	1995	1996	1997	1998	1999	2000	2001	2002	2003	2004	2005	2006	2007	2008	2009	2010	2011	2012	2013	2014	2015	2016	2017	2018	2019	2020	2021	2022	2023	2024	2025	2026	2027	2028	2029	2030
WORLD
Men	2.71132e+07	2.78906e+07	2.87257e+07	2.96087e+07	3.05289e+07	3.14794e+07	3.23505e+07	3.32592e+07	3.42076e+07	3.51982e+07	3.62324e+07	3.72197e+07	3.82629e+07	3.93587e+07	4.05051e+07	4.17015e+07	4.28762e+07	4.41205e+07	4.54275e+07	4.67883e+07	4.81977e+07	4.95949e+07	5.10492e+07	5.25616e+07	5.41371e+07	5.57782e+07	5.73979e+07	5.91006e+07	6.08782e+07	6.27194e+07	6.46185e+07	6.65203e+07	6.8486e+07	7.05184e+07	7.26224e+07	7.4799e+07	7.69689e+07	7.92188e+07	8.15426e+07	8.39312e+07	8.63785e+07
Women	2.27713e+07	2.34173e+07	2.41101e+07	2.48403e+07	2.55976e+07	2.63755e+07	2.70896e+07	2.78297e+07	2.85993e+07	2.94021e+07	3.02407e+07	3.10528e+07	3.19109e+07	3.28118e+07	3.3753e+07	3.47334e+07	3.57061e+07	3.6734e+07	3.78109e+07	3.89292e+07	4.00845e+07	4.12324e+07	4.24238e+07	4.36599e+07	4.49453e+07	4.62825e+07	4.76138e+07	4.90113e+07	5.04685e+07	5.19761e+07	5.35292e+07	5.50925e+07	5.67064e+07	5.83729e+07	6.00964e+07	6.18779e+07	6.36644e+07	6.55151e+07	6.74249e+07	6.93865e+07	7.13952e+07
Total	4.98846e+07	5.13079e+07	5.28357e+07	5.44489e+07	5.61265e+07	5.78549e+07	5.94401e+07	6.10889e+07	6.28068e+07	6.46003e+07	6.6473e+07	6.82725e+07	7.01739e+07	7.21705e+07	7.42581e+07	7.64349e+07	7.85823e+07	8.08545e+07	8.32384e+07	8.57175e+07	8.82821e+07	9.08273e+07	9.3473e+07	9.62215e+07	9.90824e+07	1.02061e+08	1.05012e+08	1.08112e+08	1.11347e+08	1.14695e+08	1.18148e+08	1.21613e+08	1.25192e+08	1.28891e+08	1.32719e+08	1.36677e+08	1.40633e+08	1.44734e+08	1.48967e+08	1.53318e+08	1.57774e+08
MEN
Afghanistan	0	0	0	0	0	0	0	0	0	0	0	0	0	0	0	0	0	0	0	0	0	0	0	0	0	0	0	0	0	0	0	0	0	0	0	0	0	0	0	0	0
Albania	0	0	0	0	0	0	0	0	0	0	0	0	0	0	0	0	0	0	0	0	0	0	0	0	0	0	0	0	0	0	0	0	0	0	0	0	0	0	0	0	0
Algeria	0	0	0	0	0	0	0	0	0	0	0	0	0	0	0	0	0	0	0	0	0	0	0	0	0	0	0	0	0	0	0	0	0	0	0	0	0	0	0	0	0
Angola	450304	462437	476753	492578	509071	525759	539635	553980	569296	586192	604968	623682	644811	667826	692124	717345	740821	765616	791720	819266	848387	876154	906215	938367	972285	1.00781e+06	1.04361e+06	1.0808e+06	1.11967e+06	1.16069e+06	1.20398e+06	1.24563e+06	1.28996e+06	1.33653e+06	1.38462e+06	1.43386e+06	1.48181e+06	1.53134e+06	1.58243e+06	1.63524e+06	1.68985e+06
Antigua and Barbuda	0	0	0	0	0	0	0	0	0	0	0	0	0	0	0	0	0	0	0	0	0	0	0	0	0	0	0	0	0	0	0	0	0	0	0	0	0	0	0	0	0
Argentina	0	0	0	0	0	0	0	0	0	0	0	0	0	0	0	0	0	0	0	0	0	0	0	0	0	0	0	0	0	0	0	0	0	0	0	0	0	0	0	0	0
Armenia	0	0	0	0	0	0	0	0	0	0	0	0	0	0	0	0	0	0	0	0	0	0	0	0	0	0	0	0	0	0	0	0	0	0	0	0	0	0	0	0	0
Australia	0	0	0	0	0	0	0	0	0	0	0	0	0	0	0	0	0	0	0	0	0	0	0	0	0	0	0	0	0	0	0	0	0	0	0	0	0	0	0	0	0
Austria	0	0	0	0	0	0	0	0	0	0	0	0	0	0	0	0	0	0	0	0	0	0	0	0	0	0	0	0	0	0	0	0	0	0	0	0	0	0	0	0	0
Azerbaijan	0	0	0	0	0	0	0	0	0	0	0	0	0	0	0	0	0	0	0	0	0	0	0	0	0	0	0	0	0	0	0	0	0	0	0	0	0	0	0	0	0
Bahrain	0	0	0	0	0	0	0	0	0	0	0	0	0	0	0	0	0	0	0	0	0	0	0	0	0	0	0	0	0	0	0	0	0	0	0	0	0	0	0	0	0
Bangladesh	0	0	0	0	0	0	0	0	0	0	0	0	0	0	0	0	0	0	0	0	0	0	0	0	0	0	0	0	0	0	0	0	0	0	0	0	0	0	0	0	0
Barbados	0	0	0	0	0	0	0	0	0	0	0	0	0	0	0	0	0	0	0	0	0	0	0	0	0	0	0	0	0	0	0	0	0	0	0	0	0	0	0	0	0
Belarus	0	0	0	0	0	0	0	0	0	0	0	0	0	0	0	0	0	0	0	0	0	0	0	0	0	0	0	0	0	0	0	0	0	0	0	0	0	0	0	0	0
Belgium	0	0	0	0	0	0	0	0	0	0	0	0	0	0	0	0	0	0	0	0	0	0	0	0	0	0	0	0	0	0	0	0	0	0	0	0	0	0	0	0	0
Belize	0	0	0	0	0	0	0	0	0	0	0	0	0	0	0	0	0	0	0	0	0	0	0	0	0	0	0	0	0	0	0	0	0	0	0	0	0	0	0	0	0
Benin	631278	657086	685954	716762	748088	778998	802952	826553	850713	876724	905511	939006	975719	1.01505e+06	1.05622e+06	1.09861e+06	1.1386e+06	1.18022e+06	1.22319e+06	1.26731e+06	1.31249e+06	1.35547e+06	1.39961e+06	1.4451e+06	1.49226e+06	1.54127e+06	1.59036e+06	1.6414e+06	1.69431e+06	1.74898e+06	1.80527e+06	1.86076e+06	1.91816e+06	1.97722e+06	2.0377e+06	2.09944e+06	2.16007e+06	2.22218e+06	2.28567e+06	2.35049e+06	2.41659e+06
Bhutan	0	0	0	0	0	0	0	0	0	0	0	0	0	0	0	0	0	0	0	0	0	0	0	0	0	0	0	0	0	0	0	0	0	0	0	0	0	0	0	0	0
Bolivia	0	0	0	0	0	0	0	0	0	0	0	0	0	0	0	0	0	0	0	0	0	0	0	0	0	0	0	0	0	0	0	0	0	0	0	0	0	0	0	0	0
Bosnia and Herzegovina	0	0	0	0	0	0	0	0	0	0	0	0	0	0	0	0	0	0	0	0	0	0	0	0	0	0	0	0	0	0	0	0	0	0	0	0	0	0	0	0	0
Botswana	0	0	0	0	0	0	0	0	0	0	0	0	0	0	0	0	0	0	0	0	0	0	0	0	0	0	0	0	0	0	0	0	0	0	0	0	0	0	0	0	0
Brazil	0	0	0	0	0	0	0	0	0	0	0	0	0	0	0	0	0	0	0	0	0	0	0	0	0	0	0	0	0	0	0	0	0	0	0	0	0	0	0	0	0
Brunei	0	0	0	0	0	0	0	0	0	0	0	0	0	0	0	0	0	0	0	0	0	0	0	0	0	0	0	0	0	0	0	0	0	0	0	0	0	0	0	0	0
Bulgaria	0	0	0	0	0	0	0	0	0	0	0	0	0	0	0	0	0	0	0	0	0	0	0	0	0	0	0	0	0	0	0	0	0	0	0	0	0	0	0	0	0
Burkina Faso	556863	570735	585789	602036	619463	638036	655686	674795	695234	716834	739524	761705	785412	810571	837152	865163	892828	922314	953540	986460	1.02107e+06	1.05489e+06	1.09089e+06	1.12892e+06	1.16884e+06	1.21057e+06	1.25194e+06	1.29535e+06	1.34078e+06	1.38828e+06	1.43785e+06	1.48665e+06	1.53783e+06	1.59116e+06	1.64637e+06	1.70329e+06	1.75908e+06	1.81692e+06	1.87668e+06	1.93831e+06	2.00177e+06
Burundi	166304	168240	170198	172243	174430	176851	179421	182174	185400	189445	194522	202720	212070	222319	233075	244015	254765	265680	276654	287606	298467	307021	315761	324672	333792	343233	352556	362394	372810	383923	395816	407798	420665	434412	448982	464331	479800	496057	513075	530787	549111
Cambodia	0	0	0	0	0	0	0	0	0	0	0	0	0	0	0	0	0	0	0	0	0	0	0	0	0	0	0	0	0	0	0	0	0	0	0	0	0	0	0	0	0
Cameroon	3.58882e+06	3.68885e+06	3.7945e+06	3.90596e+06	4.02393e+06	4.14878e+06	4.26944e+06	4.39776e+06	4.53343e+06	4.67556e+06	4.82345e+06	4.96598e+06	5.11422e+06	5.26858e+06	5.42984e+06	5.59826e+06	5.76023e+06	5.93222e+06	6.11256e+06	6.29915e+06	6.49104e+06	6.67905e+06	6.87433e+06	7.07703e+06	7.28797e+06	7.50761e+06	7.72499e+06	7.95206e+06	8.18846e+06	8.43364e+06	8.68721e+06	8.93821e+06	9.19893e+06	9.46888e+06	9.74738e+06	1.00339e+07	1.03184e+07	1.06119e+07	1.09139e+07	1.1224e+07	1.15416e+07
Canada	0	0	0	0	0	0	0	0	0	0	0	0	0	0	0	0	0	0	0	0	0	0	0	0	0	0	0	0	0	0	0	0	0	0	0	0	0	0	0	0	0
Cape Verde	0	0	0	0	0	0	0	0	0	0	0	0	0	0	0	0	0	0	0	0	0	0	0	0	0	0	0	0	0	0	0	0	0	0	0	0	0	0	0	0	0
Central African Republic	267656	273333	279917	287198	294860	302679	309637	316652	323760	331057	338578	344378	350592	357210	364212	371658	379689	388443	397846	407818	418269	428794	439674	450946	462702	474958	486270	498372	511027	523921	536917	549562	562425	575573	589176	603316	617136	631561	646516	661873	677551
Chad	604525	620599	637731	656062	675798	697067	717164	739254	763442	789852	818514	847216	878717	912285	947146	982913	1.01577e+06	1.04951e+06	1.08452e+06	1.12131e+06	1.16021e+06	1.19797e+06	1.23826e+06	1.28094e+06	1.32585e+06	1.37289e+06	1.41896e+06	1.46772e+06	1.51918e+06	1.5734e+06	1.6304e+06	1.68691e+06	1.74686e+06	1.8099e+06	1.87562e+06	1.94378e+06	2.01111e+06	2.0813e+06	2.15428e+06	2.23001e+06	2.30846e+06
Chile	0	0	0	0	0	0	0	0	0	0	0	0	0	0	0	0	0	0	0	0	0	0	0	0	0	0	0	0	0	0	0	0	0	0	0	0	0	0	0	0	0
China	0	0	0	0	0	0	0	0	0	0	0	0	0	0	0	0	0	0	0	0	0	0	0	0	0	0	0	0	0	0	0	0	0	0	0	0	0	0	0	0	0
Colombia	0	0	0	0	0	0	0	0	0	0	0	0	0	0	0	0	0	0	0	0	0	0	0	0	0	0	0	0	0	0	0	0	0	0	0	0	0	0	0	0	0
Comoros	0	0	0	0	0	0	0	0	0	0	0	0	0	0	0	0	0	0	0	0	0	0	0	0	0	0	0	0	0	0	0	0	0	0	0	0	0	0	0	0	0
Congo	211238	217531	224124	231042	238291	245864	253584	261622	269861	278174	286475	293468	300552	307889	315682	324092	333751	344128	355006	366135	377319	386935	396609	406447	416616	427273	437874	449213	461263	473955	487271	501803	516849	532500	548879	565987	582932	600657	619014	637771	656808
Costa Rica	0	0	0	0	0	0	0	0	0	0	0	0	0	0	0	0	0	0	0	0	0	0	0	0	0	0	0	0	0	0	0	0	0	0	0	0	0	0	0	0	0
Côte d’Ivoire	1.81446e+06	1.8799e+06	1.94922e+06	2.02164e+06	2.09583e+06	2.17057e+06	2.23542e+06	2.29974e+06	2.36231e+06	2.42186e+06	2.4775e+06	2.51295e+06	2.54436e+06	2.57351e+06	2.60258e+06	2.63355e+06	2.67452e+06	2.71836e+06	2.76602e+06	2.81806e+06	2.87422e+06	2.94136e+06	3.01183e+06	3.08535e+06	3.16172e+06	3.24031e+06	3.31199e+06	3.38965e+06	3.47081e+06	3.552e+06	3.63187e+06	3.71697e+06	3.79941e+06	3.88182e+06	3.96844e+06	4.06112e+06	4.15688e+06	4.25869e+06	4.36551e+06	4.47486e+06	4.58531e+06
Croatia	0	0	0	0	0	0	0	0	0	0	0	0	0	0	0	0	0	0	0	0	0	0	0	0	0	0	0	0	0	0	0	0	0	0	0	0	0	0	0	0	0
Cuba	0	0	0	0	0	0	0	0	0	0	0	0	0	0	0	0	0	0	0	0	0	0	0	0	0	0	0	0	0	0	0	0	0	0	0	0	0	0	0	0	0
Cyprus	0	0	0	0	0	0	0	0	0	0	0	0	0	0	0	0	0	0	0	0	0	0	0	0	0	0	0	0	0	0	0	0	0	0	0	0	0	0	0	0	0
Czech Republic	0	0	0	0	0	0	0	0	0	0	0	0	0	0	0	0	0	0	0	0	0	0	0	0	0	0	0	0	0	0	0	0	0	0	0	0	0	0	0	0	0
Democratic Republic of the Congo	1.91423e+06	1.98137e+06	2.05574e+06	2.13312e+06	2.20915e+06	2.28171e+06	2.33411e+06	2.38313e+06	2.43269e+06	2.48704e+06	2.54886e+06	2.61375e+06	2.68798e+06	2.76998e+06	2.85819e+06	2.95147e+06	3.03824e+06	3.1324e+06	3.23298e+06	3.33867e+06	3.44875e+06	3.55211e+06	3.66136e+06	3.77622e+06	3.89674e+06	4.02291e+06	4.14271e+06	4.26946e+06	4.40268e+06	4.54189e+06	4.68678e+06	4.82419e+06	4.96916e+06	5.12092e+06	5.27867e+06	5.44193e+06	5.59805e+06	5.7612e+06	5.93091e+06	6.10688e+06	6.28884e+06
Denmark	0	0	0	0	0	0	0	0	0	0	0	0	0	0	0	0	0	0	0	0	0	0	0	0	0	0	0	0	0	0	0	0	0	0	0	0	0	0	0	0	0
Djibouti	0	0	0	0	0	0	0	0	0	0	0	0	0	0	0	0	0	0	0	0	0	0	0	0	0	0	0	0	0	0	0	0	0	0	0	0	0	0	0	0	0
Dominican Republic	0	0	0	0	0	0	0	0	0	0	0	0	0	0	0	0	0	0	0	0	0	0	0	0	0	0	0	0	0	0	0	0	0	0	0	0	0	0	0	0	0
Ecuador	0	0	0	0	0	0	0	0	0	0	0	0	0	0	0	0	0	0	0	0	0	0	0	0	0	0	0	0	0	0	0	0	0	0	0	0	0	0	0	0	0
Egypt	0	0	0	0	0	0	0	0	0	0	0	0	0	0	0	0	0	0	0	0	0	0	0	0	0	0	0	0	0	0	0	0	0	0	0	0	0	0	0	0	0
El Salvador	0	0	0	0	0	0	0	0	0	0	0	0	0	0	0	0	0	0	0	0	0	0	0	0	0	0	0	0	0	0	0	0	0	0	0	0	0	0	0	0	0
Equatorial Guinea	862712	879285	898243	919145	941625	965665	991625	1.01929e+06	1.04959e+06	1.08362e+06	1.12181e+06	1.16006e+06	1.20301e+06	1.24961e+06	1.29812e+06	1.34737e+06	1.39176e+06	1.43702e+06	1.48332e+06	1.53135e+06	1.58146e+06	1.62793e+06	1.67766e+06	1.72971e+06	1.78294e+06	1.83688e+06	1.88855e+06	1.94129e+06	1.99541e+06	2.05162e+06	2.11029e+06	2.16687e+06	2.22625e+06	2.28813e+06	2.35199e+06	2.41751e+06	2.48111e+06	2.54675e+06	2.61429e+06	2.68366e+06	2.75474e+06
Eritrea	0	0	0	0	0	0	0	0	0	0	0	0	0	0	0	0	0	0	0	0	0	0	0	0	0	0	0	0	0	0	0	0	0	0	0	0	0	0	0	0	0
Estonia	0	0	0	0	0	0	0	0	0	0	0	0	0	0	0	0	0	0	0	0	0	0	0	0	0	0	0	0	0	0	0	0	0	0	0	0	0	0	0	0	0
Ethiopia	934608	964138	995918	1.02949e+06	1.06428e+06	1.0999e+06	1.13291e+06	1.1664e+06	1.20065e+06	1.23641e+06	1.27434e+06	1.31033e+06	1.34981e+06	1.39203e+06	1.4361e+06	1.48183e+06	1.52948e+06	1.57947e+06	1.63248e+06	1.68914e+06	1.7495e+06	1.8133e+06	1.8801e+06	1.94975e+06	2.02197e+06	2.09643e+06	2.17021e+06	2.24657e+06	2.32493e+06	2.40462e+06	2.48528e+06	2.56496e+06	2.6459e+06	2.72794e+06	2.81109e+06	2.89539e+06	2.97947e+06	3.06459e+06	3.15083e+06	3.23835e+06	3.32715e+06
Federated States of Micronesia	0	0	0	0	0	0	0	0	0	0	0	0	0	0	0	0	0	0	0	0	0	0	0	0	0	0	0	0	0	0	0	0	0	0	0	0	0	0	0	0	0
Fiji	0	0	0	0	0	0	0	0	0	0	0	0	0	0	0	0	0	0	0	0	0	0	0	0	0	0	0	0	0	0	0	0	0	0	0	0	0	0	0	0	0
Finland	0	0	0	0	0	0	0	0	0	0	0	0	0	0	0	0	0	0	0	0	0	0	0	0	0	0	0	0	0	0	0	0	0	0	0	0	0	0	0	0	0
France	0	0	0	0	0	0	0	0	0	0	0	0	0	0	0	0	0	0	0	0	0	0	0	0	0	0	0	0	0	0	0	0	0	0	0	0	0	0	0	0	0
Gabon	0	0	0	0	0	0	0	0	0	0	0	0	0	0	0	0	0	0	0	0	0	0	0	0	0	0	0	0	0	0	0	0	0	0	0	0	0	0	0	0	0
Georgia	0	0	0	0	0	0	0	0	0	0	0	0	0	0	0	0	0	0	0	0	0	0	0	0	0	0	0	0	0	0	0	0	0	0	0	0	0	0	0	0	0
Germany	0	0	0	0	0	0	0	0	0	0	0	0	0	0	0	0	0	0	0	0	0	0	0	0	0	0	0	0	0	0	0	0	0	0	0	0	0	0	0	0	0
Ghana	994833	1.02486e+06	1.05612e+06	1.08836e+06	1.12138e+06	1.15511e+06	1.18682e+06	1.21961e+06	1.25349e+06	1.28834e+06	1.32406e+06	1.35989e+06	1.39604e+06	1.43295e+06	1.47127e+06	1.51134e+06	1.55034e+06	1.59186e+06	1.63543e+06	1.6802e+06	1.72569e+06	1.77209e+06	1.81949e+06	1.8677e+06	1.91682e+06	1.96699e+06	2.01861e+06	2.07123e+06	2.12502e+06	2.18015e+06	2.23667e+06	2.29446e+06	2.35343e+06	2.41358e+06	2.47481e+06	2.53696e+06	2.59908e+06	2.66214e+06	2.72587e+06	2.78991e+06	2.85406e+06
Greece	0	0	0	0	0	0	0	0	0	0	0	0	0	0	0	0	0	0	0	0	0	0	0	0	0	0	0	0	0	0	0	0	0	0	0	0	0	0	0	0	0
Grenada	0	0	0	0	0	0	0	0	0	0	0	0	0	0	0	0	0	0	0	0	0	0	0	0	0	0	0	0	0	0	0	0	0	0	0	0	0	0	0	0	0
Guatemala	0	0	0	0	0	0	0	0	0	0	0	0	0	0	0	0	0	0	0	0	0	0	0	0	0	0	0	0	0	0	0	0	0	0	0	0	0	0	0	0	0
Guinea	354360	372612	394220	417291	439642	460033	474480	486223	496300	506026	516309	525621	535515	546277	558191	571403	585930	602417	620409	639349	658874	678076	698132	718972	740557	762871	785001	807933	831647	856151	881440	906470	932408	959178	986687	1.01487e+06	1.0427e+06	1.0713e+06	1.10061e+06	1.13061e+06	1.16124e+06
Guinea-Bissau	48160.7	49470.8	50646.8	51748	52927	54256.4	55438.8	56795.4	58291.7	59856.1	61457.2	63045	64696.3	66399.6	68154.2	69955.6	71572.3	73262	75047.9	76960	79019.7	81088.1	83352.1	85762.8	88261.2	90810.9	93223.8	95714	98287.5	100960	103742	106428	109241	112164	115179	118275	121249	124330	127513	130793	134166
Guyana	0	0	0	0	0	0	0	0	0	0	0	0	0	0	0	0	0	0	0	0	0	0	0	0	0	0	0	0	0	0	0	0	0	0	0	0	0	0	0	0	0
Haiti	0	0	0	0	0	0	0	0	0	0	0	0	0	0	0	0	0	0	0	0	0	0	0	0	0	0	0	0	0	0	0	0	0	0	0	0	0	0	0	0	0
Honduras	0	0	0	0	0	0	0	0	0	0	0	0	0	0	0	0	0	0	0	0	0	0	0	0	0	0	0	0	0	0	0	0	0	0	0	0	0	0	0	0	0
Hungary	0	0	0	0	0	0	0	0	0	0	0	0	0	0	0	0	0	0	0	0	0	0	0	0	0	0	0	0	0	0	0	0	0	0	0	0	0	0	0	0	0
Iceland	0	0	0	0	0	0	0	0	0	0	0	0	0	0	0	0	0	0	0	0	0	0	0	0	0	0	0	0	0	0	0	0	0	0	0	0	0	0	0	0	0
India	0	0	0	0	0	0	0	0	0	0	0	0	0	0	0	0	0	0	0	0	0	0	0	0	0	0	0	0	0	0	0	0	0	0	0	0	0	0	0	0	0
Indonesia	0	0	0	0	0	0	0	0	0	0	0	0	0	0	0	0	0	0	0	0	0	0	0	0	0	0	0	0	0	0	0	0	0	0	0	0	0	0	0	0	0
Iran	0	0	0	0	0	0	0	0	0	0	0	0	0	0	0	0	0	0	0	0	0	0	0	0	0	0	0	0	0	0	0	0	0	0	0	0	0	0	0	0	0
Iraq	0	0	0	0	0	0	0	0	0	0	0	0	0	0	0	0	0	0	0	0	0	0	0	0	0	0	0	0	0	0	0	0	0	0	0	0	0	0	0	0	0
Ireland	0	0	0	0	0	0	0	0	0	0	0	0	0	0	0	0	0	0	0	0	0	0	0	0	0	0	0	0	0	0	0	0	0	0	0	0	0	0	0	0	0
Israel	0	0	0	0	0	0	0	0	0	0	0	0	0	0	0	0	0	0	0	0	0	0	0	0	0	0	0	0	0	0	0	0	0	0	0	0	0	0	0	0	0
Italy	0	0	0	0	0	0	0	0	0	0	0	0	0	0	0	0	0	0	0	0	0	0	0	0	0	0	0	0	0	0	0	0	0	0	0	0	0	0	0	0	0
Jamaica	0	0	0	0	0	0	0	0	0	0	0	0	0	0	0	0	0	0	0	0	0	0	0	0	0	0	0	0	0	0	0	0	0	0	0	0	0	0	0	0	0
Japan	0	0	0	0	0	0	0	0	0	0	0	0	0	0	0	0	0	0	0	0	0	0	0	0	0	0	0	0	0	0	0	0	0	0	0	0	0	0	0	0	0
Jordan	0	0	0	0	0	0	0	0	0	0	0	0	0	0	0	0	0	0	0	0	0	0	0	0	0	0	0	0	0	0	0	0	0	0	0	0	0	0	0	0	0
Kazakhstan	0	0	0	0	0	0	0	0	0	0	0	0	0	0	0	0	0	0	0	0	0	0	0	0	0	0	0	0	0	0	0	0	0	0	0	0	0	0	0	0	0
Kenya	0	0	0	0	0	0	0	0	0	0	0	0	0	0	0	0	0	0	0	0	0	0	0	0	0	0	0	0	0	0	0	0	0	0	0	0	0	0	0	0	0
Kiribati	0	0	0	0	0	0	0	0	0	0	0	0	0	0	0	0	0	0	0	0	0	0	0	0	0	0	0	0	0	0	0	0	0	0	0	0	0	0	0	0	0
Kuwait	0	0	0	0	0	0	0	0	0	0	0	0	0	0	0	0	0	0	0	0	0	0	0	0	0	0	0	0	0	0	0	0	0	0	0	0	0	0	0	0	0
Kyrgyzstan	0	0	0	0	0	0	0	0	0	0	0	0	0	0	0	0	0	0	0	0	0	0	0	0	0	0	0	0	0	0	0	0	0	0	0	0	0	0	0	0	0
Laos	0	0	0	0	0	0	0	0	0	0	0	0	0	0	0	0	0	0	0	0	0	0	0	0	0	0	0	0	0	0	0	0	0	0	0	0	0	0	0	0	0
Latvia	0	0	0	0	0	0	0	0	0	0	0	0	0	0	0	0	0	0	0	0	0	0	0	0	0	0	0	0	0	0	0	0	0	0	0	0	0	0	0	0	0
Lebanon	0	0	0	0	0	0	0	0	0	0	0	0	0	0	0	0	0	0	0	0	0	0	0	0	0	0	0	0	0	0	0	0	0	0	0	0	0	0	0	0	0
Lesotho	0	0	0	0	0	0	0	0	0	0	0	0	0	0	0	0	0	0	0	0	0	0	0	0	0	0	0	0	0	0	0	0	0	0	0	0	0	0	0	0	0
Liberia	222550	219119	216121	214958	217286	223847	237430	256451	278130	299111	317352	328765	336726	343106	350300	359813	372442	387668	404386	421258	437502	452093	465884	479442	493474	508414	523963	540323	557425	575114	593272	611435	630187	649446	669112	689121	709089	729458	750201	771314	792786
Libya	0	0	0	0	0	0	0	0	0	0	0	0	0	0	0	0	0	0	0	0	0	0	0	0	0	0	0	0	0	0	0	0	0	0	0	0	0	0	0	0	0
Lithuania	0	0	0	0	0	0	0	0	0	0	0	0	0	0	0	0	0	0	0	0	0	0	0	0	0	0	0	0	0	0	0	0	0	0	0	0	0	0	0	0	0
Luxembourg	0	0	0	0	0	0	0	0	0	0	0	0	0	0	0	0	0	0	0	0	0	0	0	0	0	0	0	0	0	0	0	0	0	0	0	0	0	0	0	0	0
Macedonia	0	0	0	0	0	0	0	0	0	0	0	0	0	0	0	0	0	0	0	0	0	0	0	0	0	0	0	0	0	0	0	0	0	0	0	0	0	0	0	0	0
Madagascar	0	0	0	0	0	0	0	0	0	0	0	0	0	0	0	0	0	0	0	0	0	0	0	0	0	0	0	0	0	0	0	0	0	0	0	0	0	0	0	0	0
Malawi	112401	115513	117544	119014	120601	122740	124494	127125	130346	133802	137292	140690	144204	147931	151983	156402	161214	166272	171595	177246	183251	188975	195385	202265	209292	216327	223787	231034	238333	246113	254564	262860	271920	281539	291361	301205	310979	320849	330867	341185	351884
Malaysia	0	0	0	0	0	0	0	0	0	0	0	0	0	0	0	0	0	0	0	0	0	0	0	0	0	0	0	0	0	0	0	0	0	0	0	0	0	0	0	0	0
Maldives	0	0	0	0	0	0	0	0	0	0	0	0	0	0	0	0	0	0	0	0	0	0	0	0	0	0	0	0	0	0	0	0	0	0	0	0	0	0	0	0	0
Mali	151905	154772	158437	162723	167396	172293	176724	181464	186524	191950	197780	203528	209805	216531	223631	231068	238121	245642	253539	261713	270117	277300	284772	292654	301119	310298	319807	330256	341530	353473	366000	378415	391518	405330	419910	435293	450503	466654	483673	501455	519954
Malta	0	0	0	0	0	0	0	0	0	0	0	0	0	0	0	0	0	0	0	0	0	0	0	0	0	0	0	0	0	0	0	0	0	0	0	0	0	0	0	0	0
Mauritania	0	0	0	0	0	0	0	0	0	0	0	0	0	0	0	0	0	0	0	0	0	0	0	0	0	0	0	0	0	0	0	0	0	0	0	0	0	0	0	0	0
Mauritius	0	0	0	0	0	0	0	0	0	0	0	0	0	0	0	0	0	0	0	0	0	0	0	0	0	0	0	0	0	0	0	0	0	0	0	0	0	0	0	0	0
Mexico	0	0	0	0	0	0	0	0	0	0	0	0	0	0	0	0	0	0	0	0	0	0	0	0	0	0	0	0	0	0	0	0	0	0	0	0	0	0	0	0	0
Moldova	0	0	0	0	0	0	0	0	0	0	0	0	0	0	0	0	0	0	0	0	0	0	0	0	0	0	0	0	0	0	0	0	0	0	0	0	0	0	0	0	0
Mongolia	0	0	0	0	0	0	0	0	0	0	0	0	0	0	0	0	0	0	0	0	0	0	0	0	0	0	0	0	0	0	0	0	0	0	0	0	0	0	0	0	0
Montenegro	0	0	0	0	0	0	0	0	0	0	0	0	0	0	0	0	0	0	0	0	0	0	0	0	0	0	0	0	0	0	0	0	0	0	0	0	0	0	0	0	0
Morocco	0	0	0	0	0	0	0	0	0	0	0	0	0	0	0	0	0	0	0	0	0	0	0	0	0	0	0	0	0	0	0	0	0	0	0	0	0	0	0	0	0
Mozambique	0	0	0	0	0	0	0	0	0	0	0	0	0	0	0	0	0	0	0	0	0	0	0	0	0	0	0	0	0	0	0	0	0	0	0	0	0	0	0	0	0
Myanmar	0	0	0	0	0	0	0	0	0	0	0	0	0	0	0	0	0	0	0	0	0	0	0	0	0	0	0	0	0	0	0	0	0	0	0	0	0	0	0	0	0
Namibia	0	0	0	0	0	0	0	0	0	0	0	0	0	0	0	0	0	0	0	0	0	0	0	0	0	0	0	0	0	0	0	0	0	0	0	0	0	0	0	0	0
Nepal	0	0	0	0	0	0	0	0	0	0	0	0	0	0	0	0	0	0	0	0	0	0	0	0	0	0	0	0	0	0	0	0	0	0	0	0	0	0	0	0	0
Netherlands	0	0	0	0	0	0	0	0	0	0	0	0	0	0	0	0	0	0	0	0	0	0	0	0	0	0	0	0	0	0	0	0	0	0	0	0	0	0	0	0	0
New Zealand	0	0	0	0	0	0	0	0	0	0	0	0	0	0	0	0	0	0	0	0	0	0	0	0	0	0	0	0	0	0	0	0	0	0	0	0	0	0	0	0	0
Nicaragua	0	0	0	0	0	0	0	0	0	0	0	0	0	0	0	0	0	0	0	0	0	0	0	0	0	0	0	0	0	0	0	0	0	0	0	0	0	0	0	0	0
Niger	13667.4	14106.4	14625.6	15209.3	15839	16505.6	17193.3	17902.7	18627.2	19366.7	20128.4	20793.3	21512	22270.6	23057.1	23872.8	24689.2	25548.5	26450.9	27403.4	28415.2	29459.5	30570.7	31746.1	32983.2	34285.3	35603.3	37005.2	38481.9	40024.6	41634.9	43276.7	44999.5	46803.1	48693.6	50680.1	52711.3	54855.1	57106.2	59460	61920.6
Nigeria	8.14725e+06	8.36427e+06	8.59381e+06	8.83593e+06	9.09063e+06	9.35742e+06	9.6096e+06	9.87656e+06	1.01562e+07	1.04455e+07	1.07425e+07	1.10168e+07	1.13035e+07	1.16014e+07	1.19099e+07	1.22287e+07	1.25391e+07	1.28659e+07	1.32077e+07	1.35626e+07	1.39299e+07	1.42987e+07	1.46822e+07	1.50818e+07	1.55001e+07	1.59388e+07	1.63754e+07	1.6841e+07	1.73319e+07	1.78424e+07	1.83702e+07	1.89154e+07	1.9478e+07	2.00618e+07	2.06722e+07	2.13111e+07	2.19622e+07	2.26435e+07	2.33525e+07	2.40843e+07	2.48356e+07
North Korea	0	0	0	0	0	0	0	0	0	0	0	0	0	0	0	0	0	0	0	0	0	0	0	0	0	0	0	0	0	0	0	0	0	0	0	0	0	0	0	0	0
Norway	0	0	0	0	0	0	0	0	0	0	0	0	0	0	0	0	0	0	0	0	0	0	0	0	0	0	0	0	0	0	0	0	0	0	0	0	0	0	0	0	0
Oman	0	0	0	0	0	0	0	0	0	0	0	0	0	0	0	0	0	0	0	0	0	0	0	0	0	0	0	0	0	0	0	0	0	0	0	0	0	0	0	0	0
Pakistan	0	0	0	0	0	0	0	0	0	0	0	0	0	0	0	0	0	0	0	0	0	0	0	0	0	0	0	0	0	0	0	0	0	0	0	0	0	0	0	0	0
Palestine	0	0	0	0	0	0	0	0	0	0	0	0	0	0	0	0	0	0	0	0	0	0	0	0	0	0	0	0	0	0	0	0	0	0	0	0	0	0	0	0	0
Panama	0	0	0	0	0	0	0	0	0	0	0	0	0	0	0	0	0	0	0	0	0	0	0	0	0	0	0	0	0	0	0	0	0	0	0	0	0	0	0	0	0
Papua New Guinea	0	0	0	0	0	0	0	0	0	0	0	0	0	0	0	0	0	0	0	0	0	0	0	0	0	0	0	0	0	0	0	0	0	0	0	0	0	0	0	0	0
Paraguay	0	0	0	0	0	0	0	0	0	0	0	0	0	0	0	0	0	0	0	0	0	0	0	0	0	0	0	0	0	0	0	0	0	0	0	0	0	0	0	0	0
Peru	0	0	0	0	0	0	0	0	0	0	0	0	0	0	0	0	0	0	0	0	0	0	0	0	0	0	0	0	0	0	0	0	0	0	0	0	0	0	0	0	0
Philippines	0	0	0	0	0	0	0	0	0	0	0	0	0	0	0	0	0	0	0	0	0	0	0	0	0	0	0	0	0	0	0	0	0	0	0	0	0	0	0	0	0
Poland	0	0	0	0	0	0	0	0	0	0	0	0	0	0	0	0	0	0	0	0	0	0	0	0	0	0	0	0	0	0	0	0	0	0	0	0	0	0	0	0	0
Portugal	0	0	0	0	0	0	0	0	0	0	0	0	0	0	0	0	0	0	0	0	0	0	0	0	0	0	0	0	0	0	0	0	0	0	0	0	0	0	0	0	0
Qatar	0	0	0	0	0	0	0	0	0	0	0	0	0	0	0	0	0	0	0	0	0	0	0	0	0	0	0	0	0	0	0	0	0	0	0	0	0	0	0	0	0
Romania	0	0	0	0	0	0	0	0	0	0	0	0	0	0	0	0	0	0	0	0	0	0	0	0	0	0	0	0	0	0	0	0	0	0	0	0	0	0	0	0	0
Russia	0	0	0	0	0	0	0	0	0	0	0	0	0	0	0	0	0	0	0	0	0	0	0	0	0	0	0	0	0	0	0	0	0	0	0	0	0	0	0	0	0
Rwanda	0	0	0	0	0	0	0	0	0	0	0	0	0	0	0	0	0	0	0	0	0	0	0	0	0	0	0	0	0	0	0	0	0	0	0	0	0	0	0	0	0
Saint Lucia	0	0	0	0	0	0	0	0	0	0	0	0	0	0	0	0	0	0	0	0	0	0	0	0	0	0	0	0	0	0	0	0	0	0	0	0	0	0	0	0	0
Saint Vincent and the Grenadines	0	0	0	0	0	0	0	0	0	0	0	0	0	0	0	0	0	0	0	0	0	0	0	0	0	0	0	0	0	0	0	0	0	0	0	0	0	0	0	0	0
Samoa	0	0	0	0	0	0	0	0	0	0	0	0	0	0	0	0	0	0	0	0	0	0	0	0	0	0	0	0	0	0	0	0	0	0	0	0	0	0	0	0	0
São Tomé and Príncipe	0	0	0	0	0	0	0	0	0	0	0	0	0	0	0	0	0	0	0	0	0	0	0	0	0	0	0	0	0	0	0	0	0	0	0	0	0	0	0	0	0
Saudi Arabia	0	0	0	0	0	0	0	0	0	0	0	0	0	0	0	0	0	0	0	0	0	0	0	0	0	0	0	0	0	0	0	0	0	0	0	0	0	0	0	0	0
Senegal	8148.1	8403.11	8679.95	8970.88	9266.01	9560.12	9796.29	10031.2	10272.9	10531.1	10811.9	11108.6	11429.1	11770.7	12128.6	12498.9	12850.4	13220.8	13608.6	14012.9	14434.2	14887	15357.5	15847.1	16359.8	16897.4	17427.9	17992.2	18585.7	19200.1	19832.4	20484.1	21147.6	21830.6	22543.8	23291.4	24039.3	24821.1	25631.7	26461	27302.9
Serbia	0	0	0	0	0	0	0	0	0	0	0	0	0	0	0	0	0	0	0	0	0	0	0	0	0	0	0	0	0	0	0	0	0	0	0	0	0	0	0	0	0
Seychelles	0	0	0	0	0	0	0	0	0	0	0	0	0	0	0	0	0	0	0	0	0	0	0	0	0	0	0	0	0	0	0	0	0	0	0	0	0	0	0	0	0
Sierra Leone	398780	399637	397975	395127	392651	391550	391485	393335	397735	405399	416509	432102	452520	475553	498579	520027	537023	552001	565798	579591	594166	608224	622695	637744	653517	670045	685673	702366	719895	737901	756157	773323	790922	808926	827356	846196	864046	882421	901241	920416	939870
Singapore	0	0	0	0	0	0	0	0	0	0	0	0	0	0	0	0	0	0	0	0	0	0	0	0	0	0	0	0	0	0	0	0	0	0	0	0	0	0	0	0	0
Slovakia	0	0	0	0	0	0	0	0	0	0	0	0	0	0	0	0	0	0	0	0	0	0	0	0	0	0	0	0	0	0	0	0	0	0	0	0	0	0	0	0	0
Slovenia	0	0	0	0	0	0	0	0	0	0	0	0	0	0	0	0	0	0	0	0	0	0	0	0	0	0	0	0	0	0	0	0	0	0	0	0	0	0	0	0	0
Solomon Islands	0	0	0	0	0	0	0	0	0	0	0	0	0	0	0	0	0	0	0	0	0	0	0	0	0	0	0	0	0	0	0	0	0	0	0	0	0	0	0	0	0
Somalia	0	0	0	0	0	0	0	0	0	0	0	0	0	0	0	0	0	0	0	0	0	0	0	0	0	0	0	0	0	0	0	0	0	0	0	0	0	0	0	0	0
South Africa	0	0	0	0	0	0	0	0	0	0	0	0	0	0	0	0	0	0	0	0	0	0	0	0	0	0	0	0	0	0	0	0	0	0	0	0	0	0	0	0	0
South Korea	0	0	0	0	0	0	0	0	0	0	0	0	0	0	0	0	0	0	0	0	0	0	0	0	0	0	0	0	0	0	0	0	0	0	0	0	0	0	0	0	0
Spain	0	0	0	0	0	0	0	0	0	0	0	0	0	0	0	0	0	0	0	0	0	0	0	0	0	0	0	0	0	0	0	0	0	0	0	0	0	0	0	0	0
Sri Lanka	0	0	0	0	0	0	0	0	0	0	0	0	0	0	0	0	0	0	0	0	0	0	0	0	0	0	0	0	0	0	0	0	0	0	0	0	0	0	0	0	0
Sudan	3.36025e+06	3.46504e+06	3.57956e+06	3.7014e+06	3.82764e+06	3.95633e+06	4.07333e+06	4.19476e+06	4.32081e+06	4.45187e+06	4.58862e+06	4.7248e+06	4.86772e+06	5.01813e+06	5.17763e+06	5.34691e+06	5.51536e+06	5.69662e+06	5.88799e+06	6.08573e+06	6.2878e+06	6.48696e+06	6.68976e+06	6.89781e+06	7.1137e+06	7.3387e+06	7.56163e+06	7.79389e+06	8.03432e+06	8.28101e+06	8.53275e+06	8.77895e+06	9.03116e+06	9.28894e+06	9.55214e+06	9.8207e+06	1.00839e+07	1.0353e+07	1.06278e+07	1.09083e+07	1.11944e+07
Suriname	0	0	0	0	0	0	0	0	0	0	0	0	0	0	0	0	0	0	0	0	0	0	0	0	0	0	0	0	0	0	0	0	0	0	0	0	0	0	0	0	0
Swaziland	0	0	0	0	0	0	0	0	0	0	0	0	0	0	0	0	0	0	0	0	0	0	0	0	0	0	0	0	0	0	0	0	0	0	0	0	0	0	0	0	0
Sweden	0	0	0	0	0	0	0	0	0	0	0	0	0	0	0	0	0	0	0	0	0	0	0	0	0	0	0	0	0	0	0	0	0	0	0	0	0	0	0	0	0
Switzerland	0	0	0	0	0	0	0	0	0	0	0	0	0	0	0	0	0	0	0	0	0	0	0	0	0	0	0	0	0	0	0	0	0	0	0	0	0	0	0	0	0
Syria	0	0	0	0	0	0	0	0	0	0	0	0	0	0	0	0	0	0	0	0	0	0	0	0	0	0	0	0	0	0	0	0	0	0	0	0	0	0	0	0	0
Tajikistan	0	0	0	0	0	0	0	0	0	0	0	0	0	0	0	0	0	0	0	0	0	0	0	0	0	0	0	0	0	0	0	0	0	0	0	0	0	0	0	0	0
Tanzania	766472	792573	821286	851704	882684	913577	940608	967419	994522	1.02257e+06	1.05195e+06	1.08059e+06	1.1106e+06	1.14207e+06	1.17502e+06	1.20944e+06	1.24429e+06	1.2811e+06	1.31973e+06	1.36013e+06	1.40236e+06	1.44521e+06	1.49092e+06	1.53903e+06	1.589e+06	1.64065e+06	1.69375e+06	1.74834e+06	1.80493e+06	1.86429e+06	1.92675e+06	1.99019e+06	2.05677e+06	2.12628e+06	2.19825e+06	2.27239e+06	2.34726e+06	2.42451e+06	2.50404e+06	2.58585e+06	2.66989e+06
Thailand	0	0	0	0	0	0	0	0	0	0	0	0	0	0	0	0	0	0	0	0	0	0	0	0	0	0	0	0	0	0	0	0	0	0	0	0	0	0	0	0	0
The Bahamas	0	0	0	0	0	0	0	0	0	0	0	0	0	0	0	0	0	0	0	0	0	0	0	0	0	0	0	0	0	0	0	0	0	0	0	0	0	0	0	0	0
The Gambia	0	0	0	0	0	0	0	0	0	0	0	0	0	0	0	0	0	0	0	0	0	0	0	0	0	0	0	0	0	0	0	0	0	0	0	0	0	0	0	0	0
Timor-Leste	0	0	0	0	0	0	0	0	0	0	0	0	0	0	0	0	0	0	0	0	0	0	0	0	0	0	0	0	0	0	0	0	0	0	0	0	0	0	0	0	0
Togo	99965.4	102151	104348	106628	109079	111773	114988	118484	122237	126203	130338	134570	138985	143563	148279	153115	157812	162685	167708	172850	178099	183348	188718	194229	199935	205867	211746	217956	224443	231119	237943	244927	252020	259285	266811	274632	282445	290565	298937	307470	316107
Tonga	0	0	0	0	0	0	0	0	0	0	0	0	0	0	0	0	0	0	0	0	0	0	0	0	0	0	0	0	0	0	0	0	0	0	0	0	0	0	0	0	0
Trinidad and Tobago	0	0	0	0	0	0	0	0	0	0	0	0	0	0	0	0	0	0	0	0	0	0	0	0	0	0	0	0	0	0	0	0	0	0	0	0	0	0	0	0	0
Tunisia	0	0	0	0	0	0	0	0	0	0	0	0	0	0	0	0	0	0	0	0	0	0	0	0	0	0	0	0	0	0	0	0	0	0	0	0	0	0	0	0	0
Turkey	0	0	0	0	0	0	0	0	0	0	0	0	0	0	0	0	0	0	0	0	0	0	0	0	0	0	0	0	0	0	0	0	0	0	0	0	0	0	0	0	0
Turkmenistan	0	0	0	0	0	0	0	0	0	0	0	0	0	0	0	0	0	0	0	0	0	0	0	0	0	0	0	0	0	0	0	0	0	0	0	0	0	0	0	0	0
Uganda	431493	444583	458189	472328	487071	502503	516586	531651	547760	564936	583212	602220	622439	643872	666596	690643	714974	740902	768297	796980	826903	857508	889585	923153	958305	995092	1.0323e+06	1.07129e+06	1.11203e+06	1.15449e+06	1.19866e+06	1.24334e+06	1.28988e+06	1.33827e+06	1.38843e+06	1.44036e+06	1.49287e+06	1.54725e+06	1.60349e+06	1.66155e+06	1.72144e+06
Ukraine	0	0	0	0	0	0	0	0	0	0	0	0	0	0	0	0	0	0	0	0	0	0	0	0	0	0	0	0	0	0	0	0	0	0	0	0	0	0	0	0	0
United Arab Emirates	0	0	0	0	0	0	0	0	0	0	0	0	0	0	0	0	0	0	0	0	0	0	0	0	0	0	0	0	0	0	0	0	0	0	0	0	0	0	0	0	0
United Kingdom	0	0	0	0	0	0	0	0	0	0	0	0	0	0	0	0	0	0	0	0	0	0	0	0	0	0	0	0	0	0	0	0	0	0	0	0	0	0	0	0	0
United States	0	0	0	0	0	0	0	0	0	0	0	0	0	0	0	0	0	0	0	0	0	0	0	0	0	0	0	0	0	0	0	0	0	0	0	0	0	0	0	0	0
Uruguay	0	0	0	0	0	0	0	0	0	0	0	0	0	0	0	0	0	0	0	0	0	0	0	0	0	0	0	0	0	0	0	0	0	0	0	0	0	0	0	0	0
Uzbekistan	0	0	0	0	0	0	0	0	0	0	0	0	0	0	0	0	0	0	0	0	0	0	0	0	0	0	0	0	0	0	0	0	0	0	0	0	0	0	0	0	0
Vanuatu	0	0	0	0	0	0	0	0	0	0	0	0	0	0	0	0	0	0	0	0	0	0	0	0	0	0	0	0	0	0	0	0	0	0	0	0	0	0	0	0	0
Venezuela	0	0	0	0	0	0	0	0	0	0	0	0	0	0	0	0	0	0	0	0	0	0	0	0	0	0	0	0	0	0	0	0	0	0	0	0	0	0	0	0	0
Vietnam	0	0	0	0	0	0	0	0	0	0	0	0	0	0	0	0	0	0	0	0	0	0	0	0	0	0	0	0	0	0	0	0	0	0	0	0	0	0	0	0	0
Yemen	0	0	0	0	0	0	0	0	0	0	0	0	0	0	0	0	0	0	0	0	0	0	0	0	0	0	0	0	0	0	0	0	0	0	0	0	0	0	0	0	0
Zambia	0	0	0	0	0	0	0	0	0	0	0	0	0	0	0	0	0	0	0	0	0	0	0	0	0	0	0	0	0	0	0	0	0	0	0	0	0	0	0	0	0
Zimbabwe	0	0	0	0	0	0	0	0	0	0	0	0	0	0	0	0	0	0	0	0	0	0	0	0	0	0	0	0	0	0	0	0	0	0	0	0	0	0	0	0	0
	0	0	0	0	0	0	0	0	0	0	0	0	0	0	0	0	0	0	0	0	0	0	0	0	0	0	0	0	0	0	0	0	0	0	0	0	0	0	0	0	0
	0	0	0	0	0	0	0	0	0	0	0	0	0	0	0	0	0	0	0	0	0	0	0	0	0	0	0	0	0	0	0	0	0	0	0	0	0	0	0	0	0
	0	0	0	0	0	0	0	0	0	0	0	0	0	0	0	0	0	0	0	0	0	0	0	0	0	0	0	0	0	0	0	0	0	0	0	0	0	0	0	0	0
WOMEN	0	0	0	0	0	0	0	0	0	0	0	0	0	0	0	0	0	0	0	0	0	0	0	0	0	0	0	0	0	0	0	0	0	0	0	0	0	0	0	0	0
Afghanistan	0	0	0	0	0	0	0	0	0	0	0	0	0	0	0	0	0	0	0	0	0	0	0	0	0	0	0	0	0	0	0	0	0	0	0	0	0	0	0	0	0
Albania	0	0	0	0	0	0	0	0	0	0	0	0	0	0	0	0	0	0	0	0	0	0	0	0	0	0	0	0	0	0	0	0	0	0	0	0	0	0	0	0	0
Algeria	0	0	0	0	0	0	0	0	0	0	0	0	0	0	0	0	0	0	0	0	0	0	0	0	0	0	0	0	0	0	0	0	0	0	0	0	0	0	0	0	0
Angola	368753	378713	390412	403271	416565	429897	441067	452476	464584	477946	492836	507868	524796	543214	562646	582792	601573	621385	642197	664078	687116	709153	732918	758248	784895	812747	840957	870179	900658	932776	966643	999412	1.03424e+06	1.07079e+06	1.1085e+06	1.14708e+06	1.18488e+06	1.22387e+06	1.26406e+06	1.30557e+06	1.34849e+06
Antigua and Barbuda	0	0	0	0	0	0	0	0	0	0	0	0	0	0	0	0	0	0	0	0	0	0	0	0	0	0	0	0	0	0	0	0	0	0	0	0	0	0	0	0	0
Argentina	0	0	0	0	0	0	0	0	0	0	0	0	0	0	0	0	0	0	0	0	0	0	0	0	0	0	0	0	0	0	0	0	0	0	0	0	0	0	0	0	0
Armenia	0	0	0	0	0	0	0	0	0	0	0	0	0	0	0	0	0	0	0	0	0	0	0	0	0	0	0	0	0	0	0	0	0	0	0	0	0	0	0	0	0
Australia	0	0	0	0	0	0	0	0	0	0	0	0	0	0	0	0	0	0	0	0	0	0	0	0	0	0	0	0	0	0	0	0	0	0	0	0	0	0	0	0	0
Austria	0	0	0	0	0	0	0	0	0	0	0	0	0	0	0	0	0	0	0	0	0	0	0	0	0	0	0	0	0	0	0	0	0	0	0	0	0	0	0	0	0
Azerbaijan	0	0	0	0	0	0	0	0	0	0	0	0	0	0	0	0	0	0	0	0	0	0	0	0	0	0	0	0	0	0	0	0	0	0	0	0	0	0	0	0	0
Bahrain	0	0	0	0	0	0	0	0	0	0	0	0	0	0	0	0	0	0	0	0	0	0	0	0	0	0	0	0	0	0	0	0	0	0	0	0	0	0	0	0	0
Bangladesh	0	0	0	0	0	0	0	0	0	0	0	0	0	0	0	0	0	0	0	0	0	0	0	0	0	0	0	0	0	0	0	0	0	0	0	0	0	0	0	0	0
Barbados	0	0	0	0	0	0	0	0	0	0	0	0	0	0	0	0	0	0	0	0	0	0	0	0	0	0	0	0	0	0	0	0	0	0	0	0	0	0	0	0	0
Belarus	0	0	0	0	0	0	0	0	0	0	0	0	0	0	0	0	0	0	0	0	0	0	0	0	0	0	0	0	0	0	0	0	0	0	0	0	0	0	0	0	0
Belgium	0	0	0	0	0	0	0	0	0	0	0	0	0	0	0	0	0	0	0	0	0	0	0	0	0	0	0	0	0	0	0	0	0	0	0	0	0	0	0	0	0
Belize	0	0	0	0	0	0	0	0	0	0	0	0	0	0	0	0	0	0	0	0	0	0	0	0	0	0	0	0	0	0	0	0	0	0	0	0	0	0	0	0	0
Benin	591038	610735	632162	654759	677877	701119	721469	742100	763366	785762	809668	835735	863514	892812	923417	955145	986393	1.01907e+06	1.05298e+06	1.08789e+06	1.12368e+06	1.15907e+06	1.19543e+06	1.23286e+06	1.27157e+06	1.31166e+06	1.35217e+06	1.39414e+06	1.43749e+06	1.4821e+06	1.52787e+06	1.57367e+06	1.6208e+06	1.66912e+06	1.71851e+06	1.76888e+06	1.81916e+06	1.8706e+06	1.92309e+06	1.97658e+06	2.03104e+06
Bhutan	0	0	0	0	0	0	0	0	0	0	0	0	0	0	0	0	0	0	0	0	0	0	0	0	0	0	0	0	0	0	0	0	0	0	0	0	0	0	0	0	0
Bolivia	0	0	0	0	0	0	0	0	0	0	0	0	0	0	0	0	0	0	0	0	0	0	0	0	0	0	0	0	0	0	0	0	0	0	0	0	0	0	0	0	0
Bosnia and Herzegovina	0	0	0	0	0	0	0	0	0	0	0	0	0	0	0	0	0	0	0	0	0	0	0	0	0	0	0	0	0	0	0	0	0	0	0	0	0	0	0	0	0
Botswana	0	0	0	0	0	0	0	0	0	0	0	0	0	0	0	0	0	0	0	0	0	0	0	0	0	0	0	0	0	0	0	0	0	0	0	0	0	0	0	0	0
Brazil	0	0	0	0	0	0	0	0	0	0	0	0	0	0	0	0	0	0	0	0	0	0	0	0	0	0	0	0	0	0	0	0	0	0	0	0	0	0	0	0	0
Brunei	0	0	0	0	0	0	0	0	0	0	0	0	0	0	0	0	0	0	0	0	0	0	0	0	0	0	0	0	0	0	0	0	0	0	0	0	0	0	0	0	0
Bulgaria	0	0	0	0	0	0	0	0	0	0	0	0	0	0	0	0	0	0	0	0	0	0	0	0	0	0	0	0	0	0	0	0	0	0	0	0	0	0	0	0	0
Burkina Faso	618171	633013	648956	666025	684246	703605	721721	741321	762213	784160	807050	828709	851732	876035	901596	928431	954434	982090	1.01133e+06	1.04213e+06	1.07449e+06	1.10595e+06	1.13945e+06	1.17486e+06	1.21199e+06	1.25077e+06	1.28914e+06	1.32939e+06	1.37151e+06	1.41556e+06	1.46153e+06	1.5069e+06	1.55448e+06	1.60409e+06	1.65549e+06	1.70852e+06	1.76079e+06	1.81502e+06	1.8711e+06	1.92897e+06	1.98861e+06
Burundi	149818	151969	154347	156860	159359	161787	163103	164328	165804	167969	171118	177272	184543	192729	201484	210509	219563	228935	238457	247987	257439	265398	273387	281440	289653	298148	306660	315593	324998	334977	345601	356360	367865	380102	393014	406560	420334	434746	449779	465390	481520
Cambodia	0	0	0	0	0	0	0	0	0	0	0	0	0	0	0	0	0	0	0	0	0	0	0	0	0	0	0	0	0	0	0	0	0	0	0	0	0	0	0	0	0
Cameroon	3.19475e+06	3.28155e+06	3.37313e+06	3.46951e+06	3.57114e+06	3.67831e+06	3.78192e+06	3.89159e+06	4.00709e+06	4.12775e+06	4.25306e+06	4.37318e+06	4.49787e+06	4.62748e+06	4.76267e+06	4.90369e+06	5.0395e+06	5.18364e+06	5.33471e+06	5.49105e+06	5.65195e+06	5.81081e+06	5.97601e+06	6.14747e+06	6.32574e+06	6.51116e+06	6.69583e+06	6.88837e+06	7.08871e+06	7.29671e+06	7.51218e+06	7.72597e+06	7.94868e+06	8.17955e+06	8.41764e+06	8.66245e+06	8.90786e+06	9.16066e+06	9.42065e+06	9.68783e+06	9.96205e+06
Canada	0	0	0	0	0	0	0	0	0	0	0	0	0	0	0	0	0	0	0	0	0	0	0	0	0	0	0	0	0	0	0	0	0	0	0	0	0	0	0	0	0
Cape Verde	0	0	0	0	0	0	0	0	0	0	0	0	0	0	0	0	0	0	0	0	0	0	0	0	0	0	0	0	0	0	0	0	0	0	0	0	0	0	0	0	0
Central African Republic	241767	247101	253172	259800	266716	273728	280000	286260	292542	298933	305466	310541	315909	321572	327531	333849	340722	348183	356174	364632	373487	382573	391941	401627	411711	422209	432079	442594	453557	464711	475951	487080	498385	509914	521809	534140	546441	559204	572388	585914	599729
Chad	509895	522806	536586	551321	567155	584177	600213	617833	637089	658064	680781	703510	728422	754931	782425	810611	836527	863101	890669	919658	950349	980218	1.01216e+06	1.04601e+06	1.08158e+06	1.11879e+06	1.15535e+06	1.194e+06	1.23477e+06	1.2777e+06	1.32281e+06	1.36765e+06	1.41522e+06	1.46521e+06	1.51734e+06	1.57142e+06	1.62504e+06	1.68097e+06	1.73913e+06	1.79945e+06	1.86192e+06
Chile	0	0	0	0	0	0	0	0	0	0	0	0	0	0	0	0	0	0	0	0	0	0	0	0	0	0	0	0	0	0	0	0	0	0	0	0	0	0	0	0	0
China	0	0	0	0	0	0	0	0	0	0	0	0	0	0	0	0	0	0	0	0	0	0	0	0	0	0	0	0	0	0	0	0	0	0	0	0	0	0	0	0	0
Colombia	0	0	0	0	0	0	0	0	0	0	0	0	0	0	0	0	0	0	0	0	0	0	0	0	0	0	0	0	0	0	0	0	0	0	0	0	0	0	0	0	0
Comoros	0	0	0	0	0	0	0	0	0	0	0	0	0	0	0	0	0	0	0	0	0	0	0	0	0	0	0	0	0	0	0	0	0	0	0	0	0	0	0	0	0
Congo	167306	172193	177306	182656	188240	194048	199943	206058	212304	218589	224850	230154	235508	241046	246936	253310	260678	268613	276939	285455	294008	301486	309001	316635	324520	332776	341047	349873	359239	369095	379432	390747	402463	414645	427381	440671	453918	467759	482082	496715	511572
Costa Rica	0	0	0	0	0	0	0	0	0	0	0	0	0	0	0	0	0	0	0	0	0	0	0	0	0	0	0	0	0	0	0	0	0	0	0	0	0	0	0	0	0
Côte d’Ivoire	1.3917e+06	1.44678e+06	1.50485e+06	1.56531e+06	1.62719e+06	1.6896e+06	1.74547e+06	1.80089e+06	1.85521e+06	1.90777e+06	1.95809e+06	1.99518e+06	2.03017e+06	2.06406e+06	2.09798e+06	2.13314e+06	2.17614e+06	2.22106e+06	2.2689e+06	2.32043e+06	2.37561e+06	2.44036e+06	2.50801e+06	2.57839e+06	2.65137e+06	2.72643e+06	2.79616e+06	2.87123e+06	2.94956e+06	3.02818e+06	3.10591e+06	3.18792e+06	3.26789e+06	3.34812e+06	3.43227e+06	3.52193e+06	3.61387e+06	3.71117e+06	3.81295e+06	3.9171e+06	4.02237e+06
Croatia	0	0	0	0	0	0	0	0	0	0	0	0	0	0	0	0	0	0	0	0	0	0	0	0	0	0	0	0	0	0	0	0	0	0	0	0	0	0	0	0	0
Cuba	0	0	0	0	0	0	0	0	0	0	0	0	0	0	0	0	0	0	0	0	0	0	0	0	0	0	0	0	0	0	0	0	0	0	0	0	0	0	0	0	0
Cyprus	0	0	0	0	0	0	0	0	0	0	0	0	0	0	0	0	0	0	0	0	0	0	0	0	0	0	0	0	0	0	0	0	0	0	0	0	0	0	0	0	0
Czech Republic	0	0	0	0	0	0	0	0	0	0	0	0	0	0	0	0	0	0	0	0	0	0	0	0	0	0	0	0	0	0	0	0	0	0	0	0	0	0	0	0	0
Democratic Republic of the Congo	1.72236e+06	1.7794e+06	1.84275e+06	1.90862e+06	1.97306e+06	2.03412e+06	2.07793e+06	2.11844e+06	2.15912e+06	2.20384e+06	2.25507e+06	2.30944e+06	2.37201e+06	2.44137e+06	2.51606e+06	2.59504e+06	2.66937e+06	2.74987e+06	2.83574e+06	2.92599e+06	3.02011e+06	3.10907e+06	3.20331e+06	3.30244e+06	3.40628e+06	3.51475e+06	3.61897e+06	3.72884e+06	3.84406e+06	3.96446e+06	4.08989e+06	4.21026e+06	4.3372e+06	4.47e+06	4.60788e+06	4.75042e+06	4.88827e+06	5.03203e+06	5.1813e+06	5.33588e+06	5.49562e+06
Denmark	0	0	0	0	0	0	0	0	0	0	0	0	0	0	0	0	0	0	0	0	0	0	0	0	0	0	0	0	0	0	0	0	0	0	0	0	0	0	0	0	0
Djibouti	0	0	0	0	0	0	0	0	0	0	0	0	0	0	0	0	0	0	0	0	0	0	0	0	0	0	0	0	0	0	0	0	0	0	0	0	0	0	0	0	0
Dominican Republic	0	0	0	0	0	0	0	0	0	0	0	0	0	0	0	0	0	0	0	0	0	0	0	0	0	0	0	0	0	0	0	0	0	0	0	0	0	0	0	0	0
Ecuador	0	0	0	0	0	0	0	0	0	0	0	0	0	0	0	0	0	0	0	0	0	0	0	0	0	0	0	0	0	0	0	0	0	0	0	0	0	0	0	0	0
Egypt	0	0	0	0	0	0	0	0	0	0	0	0	0	0	0	0	0	0	0	0	0	0	0	0	0	0	0	0	0	0	0	0	0	0	0	0	0	0	0	0	0
El Salvador	0	0	0	0	0	0	0	0	0	0	0	0	0	0	0	0	0	0	0	0	0	0	0	0	0	0	0	0	0	0	0	0	0	0	0	0	0	0	0	0	0
Equatorial Guinea	704502	717021	731087	746431	762979	780884	800569	821558	844601	870642	900043	929662	963034	999418	1.03752e+06	1.07651e+06	1.1128e+06	1.1501e+06	1.18846e+06	1.2283e+06	1.26986e+06	1.30913e+06	1.351e+06	1.3948e+06	1.43971e+06	1.48537e+06	1.52949e+06	1.57472e+06	1.62123e+06	1.6695e+06	1.71979e+06	1.76895e+06	1.82036e+06	1.87383e+06	1.92908e+06	1.98595e+06	2.04153e+06	2.09905e+06	2.15832e+06	2.21918e+06	2.28149e+06
Eritrea	0	0	0	0	0	0	0	0	0	0	0	0	0	0	0	0	0	0	0	0	0	0	0	0	0	0	0	0	0	0	0	0	0	0	0	0	0	0	0	0	0
Estonia	0	0	0	0	0	0	0	0	0	0	0	0	0	0	0	0	0	0	0	0	0	0	0	0	0	0	0	0	0	0	0	0	0	0	0	0	0	0	0	0	0
Ethiopia	765862	790234	817012	845610	875170	905108	931039	957408	984491	1.01292e+06	1.04317e+06	1.07266e+06	1.1047e+06	1.13875e+06	1.17426e+06	1.21116e+06	1.25034e+06	1.29136e+06	1.33463e+06	1.38051e+06	1.42908e+06	1.48033e+06	1.53378e+06	1.58942e+06	1.64717e+06	1.70684e+06	1.76627e+06	1.8279e+06	1.89116e+06	1.95536e+06	2.02014e+06	2.08434e+06	2.14935e+06	2.21514e+06	2.28186e+06	2.34965e+06	2.41773e+06	2.48678e+06	2.55684e+06	2.62797e+06	2.7002e+06
Federated States of Micronesia	0	0	0	0	0	0	0	0	0	0	0	0	0	0	0	0	0	0	0	0	0	0	0	0	0	0	0	0	0	0	0	0	0	0	0	0	0	0	0	0	0
Fiji	0	0	0	0	0	0	0	0	0	0	0	0	0	0	0	0	0	0	0	0	0	0	0	0	0	0	0	0	0	0	0	0	0	0	0	0	0	0	0	0	0
Finland	0	0	0	0	0	0	0	0	0	0	0	0	0	0	0	0	0	0	0	0	0	0	0	0	0	0	0	0	0	0	0	0	0	0	0	0	0	0	0	0	0
France	0	0	0	0	0	0	0	0	0	0	0	0	0	0	0	0	0	0	0	0	0	0	0	0	0	0	0	0	0	0	0	0	0	0	0	0	0	0	0	0	0
Gabon	0	0	0	0	0	0	0	0	0	0	0	0	0	0	0	0	0	0	0	0	0	0	0	0	0	0	0	0	0	0	0	0	0	0	0	0	0	0	0	0	0
Georgia	0	0	0	0	0	0	0	0	0	0	0	0	0	0	0	0	0	0	0	0	0	0	0	0	0	0	0	0	0	0	0	0	0	0	0	0	0	0	0	0	0
Germany	0	0	0	0	0	0	0	0	0	0	0	0	0	0	0	0	0	0	0	0	0	0	0	0	0	0	0	0	0	0	0	0	0	0	0	0	0	0	0	0	0
Ghana	805784	832943	861776	891660	921879	952013	979434	1.00701e+06	1.03535e+06	1.0652e+06	1.09707e+06	1.13383e+06	1.1727e+06	1.21372e+06	1.25692e+06	1.30218e+06	1.34719e+06	1.39469e+06	1.44362e+06	1.49243e+06	1.54006e+06	1.57931e+06	1.61686e+06	1.65332e+06	1.68984e+06	1.72735e+06	1.76799e+06	1.80973e+06	1.85259e+06	1.89646e+06	1.94122e+06	1.98806e+06	2.03578e+06	2.08443e+06	2.13397e+06	2.18428e+06	2.2354e+06	2.28725e+06	2.33962e+06	2.39225e+06	2.44496e+06
Greece	0	0	0	0	0	0	0	0	0	0	0	0	0	0	0	0	0	0	0	0	0	0	0	0	0	0	0	0	0	0	0	0	0	0	0	0	0	0	0	0	0
Grenada	0	0	0	0	0	0	0	0	0	0	0	0	0	0	0	0	0	0	0	0	0	0	0	0	0	0	0	0	0	0	0	0	0	0	0	0	0	0	0	0	0
Guatemala	0	0	0	0	0	0	0	0	0	0	0	0	0	0	0	0	0	0	0	0	0	0	0	0	0	0	0	0	0	0	0	0	0	0	0	0	0	0	0	0	0
Guinea	292834	307629	325112	343719	361636	377829	389050	397923	405306	412291	419637	426259	433273	440937	449518	459160	470264	483022	497023	511763	526911	541833	557375	573489	590169	607419	624584	642398	660824	679837	699426	718933	739125	759946	781339	803264	825085	847522	870534	894095	918176
Guinea-Bissau	38119.9	39181.8	40133	41019.1	41958.2	43005.5	43948.1	45013.7	46173.2	47367.3	48570.4	49757.2	50967.7	52202	53472	54781.8	56027.3	57335.1	58719.1	60195.5	61776	63399.4	65161.8	67027.7	68954.4	70915.1	72812	74758.9	76763.1	78839.6	80997.9	83126.5	85347.3	87647.9	90011.2	92427	94788.1	97216.8	99713	102281	104919
Guyana	0	0	0	0	0	0	0	0	0	0	0	0	0	0	0	0	0	0	0	0	0	0	0	0	0	0	0	0	0	0	0	0	0	0	0	0	0	0	0	0	0
Haiti	0	0	0	0	0	0	0	0	0	0	0	0	0	0	0	0	0	0	0	0	0	0	0	0	0	0	0	0	0	0	0	0	0	0	0	0	0	0	0	0	0
Honduras	0	0	0	0	0	0	0	0	0	0	0	0	0	0	0	0	0	0	0	0	0	0	0	0	0	0	0	0	0	0	0	0	0	0	0	0	0	0	0	0	0
Hungary	0	0	0	0	0	0	0	0	0	0	0	0	0	0	0	0	0	0	0	0	0	0	0	0	0	0	0	0	0	0	0	0	0	0	0	0	0	0	0	0	0
Iceland	0	0	0	0	0	0	0	0	0	0	0	0	0	0	0	0	0	0	0	0	0	0	0	0	0	0	0	0	0	0	0	0	0	0	0	0	0	0	0	0	0
India	0	0	0	0	0	0	0	0	0	0	0	0	0	0	0	0	0	0	0	0	0	0	0	0	0	0	0	0	0	0	0	0	0	0	0	0	0	0	0	0	0
Indonesia	0	0	0	0	0	0	0	0	0	0	0	0	0	0	0	0	0	0	0	0	0	0	0	0	0	0	0	0	0	0	0	0	0	0	0	0	0	0	0	0	0
Iran	0	0	0	0	0	0	0	0	0	0	0	0	0	0	0	0	0	0	0	0	0	0	0	0	0	0	0	0	0	0	0	0	0	0	0	0	0	0	0	0	0
Iraq	0	0	0	0	0	0	0	0	0	0	0	0	0	0	0	0	0	0	0	0	0	0	0	0	0	0	0	0	0	0	0	0	0	0	0	0	0	0	0	0	0
Ireland	0	0	0	0	0	0	0	0	0	0	0	0	0	0	0	0	0	0	0	0	0	0	0	0	0	0	0	0	0	0	0	0	0	0	0	0	0	0	0	0	0
Israel	0	0	0	0	0	0	0	0	0	0	0	0	0	0	0	0	0	0	0	0	0	0	0	0	0	0	0	0	0	0	0	0	0	0	0	0	0	0	0	0	0
Italy	0	0	0	0	0	0	0	0	0	0	0	0	0	0	0	0	0	0	0	0	0	0	0	0	0	0	0	0	0	0	0	0	0	0	0	0	0	0	0	0	0
Jamaica	0	0	0	0	0	0	0	0	0	0	0	0	0	0	0	0	0	0	0	0	0	0	0	0	0	0	0	0	0	0	0	0	0	0	0	0	0	0	0	0	0
Japan	0	0	0	0	0	0	0	0	0	0	0	0	0	0	0	0	0	0	0	0	0	0	0	0	0	0	0	0	0	0	0	0	0	0	0	0	0	0	0	0	0
Jordan	0	0	0	0	0	0	0	0	0	0	0	0	0	0	0	0	0	0	0	0	0	0	0	0	0	0	0	0	0	0	0	0	0	0	0	0	0	0	0	0	0
Kazakhstan	0	0	0	0	0	0	0	0	0	0	0	0	0	0	0	0	0	0	0	0	0	0	0	0	0	0	0	0	0	0	0	0	0	0	0	0	0	0	0	0	0
Kenya	0	0	0	0	0	0	0	0	0	0	0	0	0	0	0	0	0	0	0	0	0	0	0	0	0	0	0	0	0	0	0	0	0	0	0	0	0	0	0	0	0
Kiribati	0	0	0	0	0	0	0	0	0	0	0	0	0	0	0	0	0	0	0	0	0	0	0	0	0	0	0	0	0	0	0	0	0	0	0	0	0	0	0	0	0
Kuwait	0	0	0	0	0	0	0	0	0	0	0	0	0	0	0	0	0	0	0	0	0	0	0	0	0	0	0	0	0	0	0	0	0	0	0	0	0	0	0	0	0
Kyrgyzstan	0	0	0	0	0	0	0	0	0	0	0	0	0	0	0	0	0	0	0	0	0	0	0	0	0	0	0	0	0	0	0	0	0	0	0	0	0	0	0	0	0
Laos	0	0	0	0	0	0	0	0	0	0	0	0	0	0	0	0	0	0	0	0	0	0	0	0	0	0	0	0	0	0	0	0	0	0	0	0	0	0	0	0	0
Latvia	0	0	0	0	0	0	0	0	0	0	0	0	0	0	0	0	0	0	0	0	0	0	0	0	0	0	0	0	0	0	0	0	0	0	0	0	0	0	0	0	0
Lebanon	0	0	0	0	0	0	0	0	0	0	0	0	0	0	0	0	0	0	0	0	0	0	0	0	0	0	0	0	0	0	0	0	0	0	0	0	0	0	0	0	0
Lesotho	0	0	0	0	0	0	0	0	0	0	0	0	0	0	0	0	0	0	0	0	0	0	0	0	0	0	0	0	0	0	0	0	0	0	0	0	0	0	0	0	0
Liberia	179432	176854	174594	173756	175647	180859	191514	206415	223368	239717	253845	262666	268708	273448	278791	285937	295653	307379	320247	333201	345611	356769	367243	377479	388030	399244	410998	423349	436236	449532	463143	476867	490994	505473	520242	535262	550378	565784	581468	597432	613676
Libya	0	0	0	0	0	0	0	0	0	0	0	0	0	0	0	0	0	0	0	0	0	0	0	0	0	0	0	0	0	0	0	0	0	0	0	0	0	0	0	0	0
Lithuania	0	0	0	0	0	0	0	0	0	0	0	0	0	0	0	0	0	0	0	0	0	0	0	0	0	0	0	0	0	0	0	0	0	0	0	0	0	0	0	0	0
Luxembourg	0	0	0	0	0	0	0	0	0	0	0	0	0	0	0	0	0	0	0	0	0	0	0	0	0	0	0	0	0	0	0	0	0	0	0	0	0	0	0	0	0
Macedonia	0	0	0	0	0	0	0	0	0	0	0	0	0	0	0	0	0	0	0	0	0	0	0	0	0	0	0	0	0	0	0	0	0	0	0	0	0	0	0	0	0
Madagascar	0	0	0	0	0	0	0	0	0	0	0	0	0	0	0	0	0	0	0	0	0	0	0	0	0	0	0	0	0	0	0	0	0	0	0	0	0	0	0	0	0
Malawi	94642.9	96692.8	97844	98538.2	99346.5	100634	101899	103863	106295	108908	111531	114067	116678	119442	122447	125728	129310	133073	137032	141234	145698	149936	154686	159784	164987	170187	175692	181028	186397	192123	198352	204470	211161	218274	225542	232833	240111	247466	254940	262647	270651
Malaysia	0	0	0	0	0	0	0	0	0	0	0	0	0	0	0	0	0	0	0	0	0	0	0	0	0	0	0	0	0	0	0	0	0	0	0	0	0	0	0	0	0
Maldives	0	0	0	0	0	0	0	0	0	0	0	0	0	0	0	0	0	0	0	0	0	0	0	0	0	0	0	0	0	0	0	0	0	0	0	0	0	0	0	0	0
Mali	160814	163686	167189	171182	175488	179981	183982	188250	192799	197670	202891	207993	213577	219564	225874	232466	238714	245372	252376	259667	267221	273986	281086	288600	296638	305286	314089	323697	334022	344947	356409	367820	379863	392554	405938	420044	434093	448996	464688	481084	498145
Malta	0	0	0	0	0	0	0	0	0	0	0	0	0	0	0	0	0	0	0	0	0	0	0	0	0	0	0	0	0	0	0	0	0	0	0	0	0	0	0	0	0
Mauritania	0	0	0	0	0	0	0	0	0	0	0	0	0	0	0	0	0	0	0	0	0	0	0	0	0	0	0	0	0	0	0	0	0	0	0	0	0	0	0	0	0
Mauritius	0	0	0	0	0	0	0	0	0	0	0	0	0	0	0	0	0	0	0	0	0	0	0	0	0	0	0	0	0	0	0	0	0	0	0	0	0	0	0	0	0
Mexico	0	0	0	0	0	0	0	0	0	0	0	0	0	0	0	0	0	0	0	0	0	0	0	0	0	0	0	0	0	0	0	0	0	0	0	0	0	0	0	0	0
Moldova	0	0	0	0	0	0	0	0	0	0	0	0	0	0	0	0	0	0	0	0	0	0	0	0	0	0	0	0	0	0	0	0	0	0	0	0	0	0	0	0	0
Mongolia	0	0	0	0	0	0	0	0	0	0	0	0	0	0	0	0	0	0	0	0	0	0	0	0	0	0	0	0	0	0	0	0	0	0	0	0	0	0	0	0	0
Montenegro	0	0	0	0	0	0	0	0	0	0	0	0	0	0	0	0	0	0	0	0	0	0	0	0	0	0	0	0	0	0	0	0	0	0	0	0	0	0	0	0	0
Morocco	0	0	0	0	0	0	0	0	0	0	0	0	0	0	0	0	0	0	0	0	0	0	0	0	0	0	0	0	0	0	0	0	0	0	0	0	0	0	0	0	0
Mozambique	0	0	0	0	0	0	0	0	0	0	0	0	0	0	0	0	0	0	0	0	0	0	0	0	0	0	0	0	0	0	0	0	0	0	0	0	0	0	0	0	0
Myanmar	0	0	0	0	0	0	0	0	0	0	0	0	0	0	0	0	0	0	0	0	0	0	0	0	0	0	0	0	0	0	0	0	0	0	0	0	0	0	0	0	0
Namibia	0	0	0	0	0	0	0	0	0	0	0	0	0	0	0	0	0	0	0	0	0	0	0	0	0	0	0	0	0	0	0	0	0	0	0	0	0	0	0	0	0
Nepal	0	0	0	0	0	0	0	0	0	0	0	0	0	0	0	0	0	0	0	0	0	0	0	0	0	0	0	0	0	0	0	0	0	0	0	0	0	0	0	0	0
Netherlands	0	0	0	0	0	0	0	0	0	0	0	0	0	0	0	0	0	0	0	0	0	0	0	0	0	0	0	0	0	0	0	0	0	0	0	0	0	0	0	0	0
New Zealand	0	0	0	0	0	0	0	0	0	0	0	0	0	0	0	0	0	0	0	0	0	0	0	0	0	0	0	0	0	0	0	0	0	0	0	0	0	0	0	0	0
Nicaragua	0	0	0	0	0	0	0	0	0	0	0	0	0	0	0	0	0	0	0	0	0	0	0	0	0	0	0	0	0	0	0	0	0	0	0	0	0	0	0	0	0
Niger	14048.2	14458.9	14908.1	15392.8	15912.5	16466.2	16944.3	17470.3	18036.2	18634.6	19263.2	19817.9	20426.7	21080.7	21773.1	22503	23204	23955.7	24758.8	25616.9	26532.9	27443.3	28420	29462.1	30569.3	31741.3	32898.8	34141.4	35461.8	36851.8	38309	39774.4	41320.2	42948.9	44667	46479.7	48312.4	50256.1	52307.4	54461.8	56719.2
Nigeria	6.55834e+06	6.73042e+06	6.91197e+06	7.10248e+06	7.30129e+06	7.50762e+06	7.70381e+06	7.90939e+06	8.12285e+06	8.34232e+06	8.56643e+06	8.7766e+06	8.99519e+06	9.22117e+06	9.45387e+06	9.69299e+06	9.9305e+06	1.01795e+07	1.04388e+07	1.07072e+07	1.09842e+07	1.12677e+07	1.15619e+07	1.18677e+07	1.2187e+07	1.25209e+07	1.28583e+07	1.32173e+07	1.35948e+07	1.39864e+07	1.43899e+07	1.48097e+07	1.52415e+07	1.5688e+07	1.61536e+07	1.66397e+07	1.71376e+07	1.7658e+07	1.81985e+07	1.87549e+07	1.93247e+07
North Korea	0	0	0	0	0	0	0	0	0	0	0	0	0	0	0	0	0	0	0	0	0	0	0	0	0	0	0	0	0	0	0	0	0	0	0	0	0	0	0	0	0
Norway	0	0	0	0	0	0	0	0	0	0	0	0	0	0	0	0	0	0	0	0	0	0	0	0	0	0	0	0	0	0	0	0	0	0	0	0	0	0	0	0	0
Oman	0	0	0	0	0	0	0	0	0	0	0	0	0	0	0	0	0	0	0	0	0	0	0	0	0	0	0	0	0	0	0	0	0	0	0	0	0	0	0	0	0
Pakistan	0	0	0	0	0	0	0	0	0	0	0	0	0	0	0	0	0	0	0	0	0	0	0	0	0	0	0	0	0	0	0	0	0	0	0	0	0	0	0	0	0
Palestine	0	0	0	0	0	0	0	0	0	0	0	0	0	0	0	0	0	0	0	0	0	0	0	0	0	0	0	0	0	0	0	0	0	0	0	0	0	0	0	0	0
Panama	0	0	0	0	0	0	0	0	0	0	0	0	0	0	0	0	0	0	0	0	0	0	0	0	0	0	0	0	0	0	0	0	0	0	0	0	0	0	0	0	0
Papua New Guinea	0	0	0	0	0	0	0	0	0	0	0	0	0	0	0	0	0	0	0	0	0	0	0	0	0	0	0	0	0	0	0	0	0	0	0	0	0	0	0	0	0
Paraguay	0	0	0	0	0	0	0	0	0	0	0	0	0	0	0	0	0	0	0	0	0	0	0	0	0	0	0	0	0	0	0	0	0	0	0	0	0	0	0	0	0
Peru	0	0	0	0	0	0	0	0	0	0	0	0	0	0	0	0	0	0	0	0	0	0	0	0	0	0	0	0	0	0	0	0	0	0	0	0	0	0	0	0	0
Philippines	0	0	0	0	0	0	0	0	0	0	0	0	0	0	0	0	0	0	0	0	0	0	0	0	0	0	0	0	0	0	0	0	0	0	0	0	0	0	0	0	0
Poland	0	0	0	0	0	0	0	0	0	0	0	0	0	0	0	0	0	0	0	0	0	0	0	0	0	0	0	0	0	0	0	0	0	0	0	0	0	0	0	0	0
Portugal	0	0	0	0	0	0	0	0	0	0	0	0	0	0	0	0	0	0	0	0	0	0	0	0	0	0	0	0	0	0	0	0	0	0	0	0	0	0	0	0	0
Qatar	0	0	0	0	0	0	0	0	0	0	0	0	0	0	0	0	0	0	0	0	0	0	0	0	0	0	0	0	0	0	0	0	0	0	0	0	0	0	0	0	0
Romania	0	0	0	0	0	0	0	0	0	0	0	0	0	0	0	0	0	0	0	0	0	0	0	0	0	0	0	0	0	0	0	0	0	0	0	0	0	0	0	0	0
Russia	0	0	0	0	0	0	0	0	0	0	0	0	0	0	0	0	0	0	0	0	0	0	0	0	0	0	0	0	0	0	0	0	0	0	0	0	0	0	0	0	0
Rwanda	0	0	0	0	0	0	0	0	0	0	0	0	0	0	0	0	0	0	0	0	0	0	0	0	0	0	0	0	0	0	0	0	0	0	0	0	0	0	0	0	0
Saint Lucia	0	0	0	0	0	0	0	0	0	0	0	0	0	0	0	0	0	0	0	0	0	0	0	0	0	0	0	0	0	0	0	0	0	0	0	0	0	0	0	0	0
Saint Vincent and the Grenadines	0	0	0	0	0	0	0	0	0	0	0	0	0	0	0	0	0	0	0	0	0	0	0	0	0	0	0	0	0	0	0	0	0	0	0	0	0	0	0	0	0
Samoa	0	0	0	0	0	0	0	0	0	0	0	0	0	0	0	0	0	0	0	0	0	0	0	0	0	0	0	0	0	0	0	0	0	0	0	0	0	0	0	0	0
São Tomé and Príncipe	0	0	0	0	0	0	0	0	0	0	0	0	0	0	0	0	0	0	0	0	0	0	0	0	0	0	0	0	0	0	0	0	0	0	0	0	0	0	0	0	0
Saudi Arabia	0	0	0	0	0	0	0	0	0	0	0	0	0	0	0	0	0	0	0	0	0	0	0	0	0	0	0	0	0	0	0	0	0	0	0	0	0	0	0	0	0
Senegal	6198.54	6404.9	6627.18	6861.53	7103.22	7350.01	7577.13	7810.79	8053.41	8307.89	8575.79	8841.13	9120.18	9412.32	9716.71	10032.2	10335.2	10653.8	10985.3	11326	11674.6	12026.1	12385.1	12754.4	13138.8	13541.3	13937.2	14358.2	14800.4	15257.2	15725.8	16206.6	16695.4	17197.5	17721	18268.9	18815.4	19386.2	19977.7	20582.6	21196.6
Serbia	0	0	0	0	0	0	0	0	0	0	0	0	0	0	0	0	0	0	0	0	0	0	0	0	0	0	0	0	0	0	0	0	0	0	0	0	0	0	0	0	0
Seychelles	0	0	0	0	0	0	0	0	0	0	0	0	0	0	0	0	0	0	0	0	0	0	0	0	0	0	0	0	0	0	0	0	0	0	0	0	0	0	0	0	0
Sierra Leone	327143	328179	327190	325273	323707	323322	323614	325503	329517	336234	345805	358847	375786	394803	413734	431273	444835	456646	467426	478165	489527	500456	511700	523408	535715	548649	560766	573769	587472	601567	615861	629187	642858	656863	671238	685975	699817	714102	728779	743781	759048
Singapore	0	0	0	0	0	0	0	0	0	0	0	0	0	0	0	0	0	0	0	0	0	0	0	0	0	0	0	0	0	0	0	0	0	0	0	0	0	0	0	0	0
Slovakia	0	0	0	0	0	0	0	0	0	0	0	0	0	0	0	0	0	0	0	0	0	0	0	0	0	0	0	0	0	0	0	0	0	0	0	0	0	0	0	0	0
Slovenia	0	0	0	0	0	0	0	0	0	0	0	0	0	0	0	0	0	0	0	0	0	0	0	0	0	0	0	0	0	0	0	0	0	0	0	0	0	0	0	0	0
Solomon Islands	0	0	0	0	0	0	0	0	0	0	0	0	0	0	0	0	0	0	0	0	0	0	0	0	0	0	0	0	0	0	0	0	0	0	0	0	0	0	0	0	0
Somalia	0	0	0	0	0	0	0	0	0	0	0	0	0	0	0	0	0	0	0	0	0	0	0	0	0	0	0	0	0	0	0	0	0	0	0	0	0	0	0	0	0
South Africa	0	0	0	0	0	0	0	0	0	0	0	0	0	0	0	0	0	0	0	0	0	0	0	0	0	0	0	0	0	0	0	0	0	0	0	0	0	0	0	0	0
South Korea	0	0	0	0	0	0	0	0	0	0	0	0	0	0	0	0	0	0	0	0	0	0	0	0	0	0	0	0	0	0	0	0	0	0	0	0	0	0	0	0	0
Spain	0	0	0	0	0	0	0	0	0	0	0	0	0	0	0	0	0	0	0	0	0	0	0	0	0	0	0	0	0	0	0	0	0	0	0	0	0	0	0	0	0
Sri Lanka	0	0	0	0	0	0	0	0	0	0	0	0	0	0	0	0	0	0	0	0	0	0	0	0	0	0	0	0	0	0	0	0	0	0	0	0	0	0	0	0	0
Sudan	2.75542e+06	2.84116e+06	2.93455e+06	3.03377e+06	3.1366e+06	3.24156e+06	3.33846e+06	3.43907e+06	3.54354e+06	3.65216e+06	3.76546e+06	3.87859e+06	3.99729e+06	4.12202e+06	4.25392e+06	4.39349e+06	4.53217e+06	4.68091e+06	4.83761e+06	4.99938e+06	5.16468e+06	5.32809e+06	5.49445e+06	5.66502e+06	5.8419e+06	6.0261e+06	6.20896e+06	6.39938e+06	6.59637e+06	6.79834e+06	7.00431e+06	7.20626e+06	7.41301e+06	7.62424e+06	7.83991e+06	8.06003e+06	8.27663e+06	8.49808e+06	8.7243e+06	8.95533e+06	9.19122e+06
Suriname	0	0	0	0	0	0	0	0	0	0	0	0	0	0	0	0	0	0	0	0	0	0	0	0	0	0	0	0	0	0	0	0	0	0	0	0	0	0	0	0	0
Swaziland	0	0	0	0	0	0	0	0	0	0	0	0	0	0	0	0	0	0	0	0	0	0	0	0	0	0	0	0	0	0	0	0	0	0	0	0	0	0	0	0	0
Sweden	0	0	0	0	0	0	0	0	0	0	0	0	0	0	0	0	0	0	0	0	0	0	0	0	0	0	0	0	0	0	0	0	0	0	0	0	0	0	0	0	0
Switzerland	0	0	0	0	0	0	0	0	0	0	0	0	0	0	0	0	0	0	0	0	0	0	0	0	0	0	0	0	0	0	0	0	0	0	0	0	0	0	0	0	0
Syria	0	0	0	0	0	0	0	0	0	0	0	0	0	0	0	0	0	0	0	0	0	0	0	0	0	0	0	0	0	0	0	0	0	0	0	0	0	0	0	0	0
Tajikistan	0	0	0	0	0	0	0	0	0	0	0	0	0	0	0	0	0	0	0	0	0	0	0	0	0	0	0	0	0	0	0	0	0	0	0	0	0	0	0	0	0
Tanzania	660678	682643	706755	732199	757959	783467	805553	827270	849067	871521	894992	917741	941509	966392	992477	1.01979e+06	1.04766e+06	1.07719e+06	1.10824e+06	1.14078e+06	1.17484e+06	1.20987e+06	1.24729e+06	1.2867e+06	1.32763e+06	1.36991e+06	1.41353e+06	1.45832e+06	1.50473e+06	1.5534e+06	1.60462e+06	1.65687e+06	1.71167e+06	1.76886e+06	1.82804e+06	1.88899e+06	1.95085e+06	2.01466e+06	2.08035e+06	2.14791e+06	2.21731e+06
Thailand	0	0	0	0	0	0	0	0	0	0	0	0	0	0	0	0	0	0	0	0	0	0	0	0	0	0	0	0	0	0	0	0	0	0	0	0	0	0	0	0	0
The Bahamas	0	0	0	0	0	0	0	0	0	0	0	0	0	0	0	0	0	0	0	0	0	0	0	0	0	0	0	0	0	0	0	0	0	0	0	0	0	0	0	0	0
The Gambia	0	0	0	0	0	0	0	0	0	0	0	0	0	0	0	0	0	0	0	0	0	0	0	0	0	0	0	0	0	0	0	0	0	0	0	0	0	0	0	0	0
Timor-Leste	0	0	0	0	0	0	0	0	0	0	0	0	0	0	0	0	0	0	0	0	0	0	0	0	0	0	0	0	0	0	0	0	0	0	0	0	0	0	0	0	0
Togo	81629.2	84030.4	86551.2	89182.5	91910.7	94734.1	97593.3	100552	103617	106795	110084	113393	116812	120329	123934	127614	131221	134954	138796	142720	146717	150753	154874	159092	163447	167962	172454	177188	182124	187194	192372	197747	203196	208770	214544	220544	226613	232912	239402	246013	252703
Tonga	0	0	0	0	0	0	0	0	0	0	0	0	0	0	0	0	0	0	0	0	0	0	0	0	0	0	0	0	0	0	0	0	0	0	0	0	0	0	0	0	0
Trinidad and Tobago	0	0	0	0	0	0	0	0	0	0	0	0	0	0	0	0	0	0	0	0	0	0	0	0	0	0	0	0	0	0	0	0	0	0	0	0	0	0	0	0	0
Tunisia	0	0	0	0	0	0	0	0	0	0	0	0	0	0	0	0	0	0	0	0	0	0	0	0	0	0	0	0	0	0	0	0	0	0	0	0	0	0	0	0	0
Turkey	0	0	0	0	0	0	0	0	0	0	0	0	0	0	0	0	0	0	0	0	0	0	0	0	0	0	0	0	0	0	0	0	0	0	0	0	0	0	0	0	0
Turkmenistan	0	0	0	0	0	0	0	0	0	0	0	0	0	0	0	0	0	0	0	0	0	0	0	0	0	0	0	0	0	0	0	0	0	0	0	0	0	0	0	0	0
Uganda	370341	381517	393090	405050	417436	430305	441754	453919	466866	480643	495299	510505	526687	543844	562041	581311	600993	621975	644173	667472	691853	717253	743925	771860	801097	831656	862657	895092	928947	964203	1.00086e+06	1.03812e+06	1.07689e+06	1.11718e+06	1.15894e+06	1.20217e+06	1.24611e+06	1.29161e+06	1.33864e+06	1.38717e+06	1.43722e+06
Ukraine	0	0	0	0	0	0	0	0	0	0	0	0	0	0	0	0	0	0	0	0	0	0	0	0	0	0	0	0	0	0	0	0	0	0	0	0	0	0	0	0	0
United Arab Emirates	0	0	0	0	0	0	0	0	0	0	0	0	0	0	0	0	0	0	0	0	0	0	0	0	0	0	0	0	0	0	0	0	0	0	0	0	0	0	0	0	0
United Kingdom	0	0	0	0	0	0	0	0	0	0	0	0	0	0	0	0	0	0	0	0	0	0	0	0	0	0	0	0	0	0	0	0	0	0	0	0	0	0	0	0	0
United States	0	0	0	0	0	0	0	0	0	0	0	0	0	0	0	0	0	0	0	0	0	0	0	0	0	0	0	0	0	0	0	0	0	0	0	0	0	0	0	0	0
Uruguay	0	0	0	0	0	0	0	0	0	0	0	0	0	0	0	0	0	0	0	0	0	0	0	0	0	0	0	0	0	0	0	0	0	0	0	0	0	0	0	0	0
Uzbekistan	0	0	0	0	0	0	0	0	0	0	0	0	0	0	0	0	0	0	0	0	0	0	0	0	0	0	0	0	0	0	0	0	0	0	0	0	0	0	0	0	0
Vanuatu	0	0	0	0	0	0	0	0	0	0	0	0	0	0	0	0	0	0	0	0	0	0	0	0	0	0	0	0	0	0	0	0	0	0	0	0	0	0	0	0	0
Venezuela	0	0	0	0	0	0	0	0	0	0	0	0	0	0	0	0	0	0	0	0	0	0	0	0	0	0	0	0	0	0	0	0	0	0	0	0	0	0	0	0	0
Vietnam	0	0	0	0	0	0	0	0	0	0	0	0	0	0	0	0	0	0	0	0	0	0	0	0	0	0	0	0	0	0	0	0	0	0	0	0	0	0	0	0	0
Yemen	0	0	0	0	0	0	0	0	0	0	0	0	0	0	0	0	0	0	0	0	0	0	0	0	0	0	0	0	0	0	0	0	0	0	0	0	0	0	0	0	0
Zambia	0	0	0	0	0	0	0	0	0	0	0	0	0	0	0	0	0	0	0	0	0	0	0	0	0	0	0	0	0	0	0	0	0	0	0	0	0	0	0	0	0
Zimbabwe	0	0	0	0	0	0	0	0	0	0	0	0	0	0	0	0	0	0	0	0	0	0	0	0	0	0	0	0	0	0	0	0	0	0	0	0	0	0	0	0	0

## Sheet: Results
Onchocerciasis skin disease - Total Cost (women + men)
	2011-2020	2021-2030
CF	1.03898e+09	1.39052e+09
	discounting	0
	Productivity loss	0.0321
Prevalence oncho per quintile
Q1	Q2	Q3	Q4	Q5
1	0	0	0	0

## Sheet: WHO regions
Africa	Americas	South-East Asia	Eastern Mediterranean	Europe	Western Pacific
AFRO	AMRO	SEARO	EMRO	EURO	WPRO
1	2	3	4	5	6
Algeria	Antigua and Barbuda	Bangladesh	Afghanistan	Albania	Australia
Angola	Argentina	Bhutan	Bahrain	Andorra	Brunei Darussalam
Benin	Bahamas	Democratic People's Republic of Korea	Djibouti	Armenia	Cambodia
Botswana	Barbados	India	Egypt	Austria	China
Burkina Faso	Belize	Indonesia	Iran (Islamic Republic of)	Azerbaijan	Cook Islands
Burundi	Bolivia (Plurinational State of)	Maldives	Iraq	Belarus	Fiji
Cameroon	Brazil	Myanmar	Jordan	Belgium	Japan
Cape Verde	Canada	Nepal	Kuwait	Bosnia and Herzegovina	Kiribati
Central African Republic	Chile	Sri Lanka	Lebanon	Bulgaria	Lao People's Democratic Republic
Chad	Colombia	Thailand	Libya	Croatia	Malaysia
Comoros	Costa Rica	Timor-Leste	Morocco	Cyprus	Marshall Islands
Congo	Cuba		Oman	Czech Republic	Micronesia (Federated States of)
Côte d'Ivoire	Dominica		Pakistan	Denmark	Mongolia
Democratic Republic of the Congo	Dominican Republic		Qatar	Estonia	Nauru
Equatorial Guinea	Ecuador		Saudi Arabia	Finland	New Zealand
Eritrea	El Salvador		Somalia	France	Niue
Ethiopia	Grenada		Sudan	Georgia	Palau
Gabon	Guatemala		Syrian Arab Republic	Germany	Papua New Guinea
Gambia	Guyana		Tunisia	Greece	Philippines
Ghana	Haiti		United Arab Emirates	Hungary	Republic of Korea
Guinea	Honduras		Yemen	Iceland	Samoa
Guinea-Bissau	Jamaica			Ireland	Singapore
Kenya	Mexico			Israel	Solomon Islands
Lesotho	Nicaragua			Italy	Tonga
Liberia	Panama			Kazakhstan	Tuvalu
Madagascar	Paraguay			Kyrgyzstan	Vanuatu
Malawi	Peru			Latvia	Viet Nam
Mali	Saint Kitts and Nevis			Lithuania
Mauritania	Saint Lucia			Luxembourg
Mauritius	Saint Vincent and the Grenadines			Malta
Mozambique	Suriname			Monaco
Namibia	Trinidad and Tobago			Montenegro
Niger	United States of America			Netherlands
Nigeria	Uruguay			Norway
Rwanda	Venezuela (Bolivarian Republic of)			Poland
Sao Tome and Principe				Portugal
Senegal				Republic of Moldova
Seychelles				Romania
Sierra Leone				Russian Federation
South Africa				San Marino
South Sudan				Serbia
Swaziland				Slovakia
Togo				Slovenia
Uganda				Spain
United Republic of Tanzania				Sweden
Zambia				Switzerland
Zimbabwe				Tajikistan
				The former Yugoslav Republic of Macedonia
				Turkey
				Turkmenistan
				Ukraine
				United Kingdom
				Uzbekistan

## Sheet: Per region
	1990	1991	1992	1993	1994	1995	1996	1997	1998	1999	2000	2001	2002	2003	2004	2005	2006	2007	2008	2009	2010	2011	2012	2013	2014	2015	2016	2017	2018	2019	2020	2021	2022	2023	2024	2025	2026	2027	2028	2029	2030		WHO Region				1990	1991	1992
WORLD																																														Region
Men	2.71132e+07	2.78906e+07	2.87257e+07	2.96087e+07	3.05289e+07	3.14794e+07	3.23505e+07	3.32592e+07	3.42076e+07	3.51982e+07	3.62324e+07	3.72197e+07	3.82629e+07	3.93587e+07	4.05051e+07	4.17015e+07	4.28762e+07	4.41205e+07	4.54275e+07	4.67883e+07	4.81977e+07	4.95949e+07	5.10492e+07	5.25616e+07	5.41371e+07	5.57782e+07	5.73979e+07	5.91006e+07	6.08782e+07	6.27194e+07	6.46185e+07	6.65203e+07	6.8486e+07	7.05184e+07	7.26224e+07	7.4799e+07	7.69689e+07	7.92188e+07	8.15426e+07	8.39312e+07	8.63785e+07				Africa	1	4.37689e+07	4.50017e+07	4.63216e+07
Women	2.27713e+07	2.34173e+07	2.41101e+07	2.48403e+07	2.55976e+07	2.63755e+07	2.70896e+07	2.78297e+07	2.85993e+07	2.94021e+07	3.02407e+07	3.10528e+07	3.19109e+07	3.28118e+07	3.3753e+07	3.47334e+07	3.57061e+07	3.6734e+07	3.78109e+07	3.89292e+07	4.00845e+07	4.12324e+07	4.24238e+07	4.36599e+07	4.49453e+07	4.62825e+07	4.76138e+07	4.90113e+07	5.04685e+07	5.19761e+07	5.35292e+07	5.50925e+07	5.67064e+07	5.83729e+07	6.00964e+07	6.18779e+07	6.36644e+07	6.55151e+07	6.74249e+07	6.93865e+07	7.13952e+07				Americas	2	0	0	0
Total	4.98846e+07	5.13079e+07	5.28357e+07	5.44489e+07	5.61265e+07	5.78549e+07	5.94401e+07	6.10889e+07	6.28068e+07	6.46003e+07	6.6473e+07	6.82725e+07	7.01739e+07	7.21705e+07	7.42581e+07	7.64349e+07	7.85823e+07	8.08545e+07	8.32384e+07	8.57175e+07	8.82821e+07	9.08273e+07	9.3473e+07	9.62215e+07	9.90824e+07	1.02061e+08	1.05012e+08	1.08112e+08	1.11347e+08	1.14695e+08	1.18148e+08	1.21613e+08	1.25192e+08	1.28891e+08	1.32719e+08	1.36677e+08	1.40633e+08	1.44734e+08	1.48967e+08	1.53318e+08	1.57774e+08				South-East Asia	3	0	0	0
																																													Eastern Mediterranean	4	6.11567e+06	6.3062e+06	6.51411e+06
																																													Europe	5	0	0	0
MEN																																													Western Pacific	6	0	0	0
Afghanistan	0	0	0	0	0	0	0	0	0	0	0	0	0	0	0	0	0	0	0	0	0	0	0	0	0	0	0	0	0	0	0	0	0	0	0	0	0	0	0	0	0		4			totaal	4.98846e+07	5.13079e+07	5.28357e+07
Albania	0	0	0	0	0	0	0	0	0	0	0	0	0	0	0	0	0	0	0	0	0	0	0	0	0	0	0	0	0	0	0	0	0	0	0	0	0	0	0	0	0		5			check	1	1	1
Algeria	0	0	0	0	0	0	0	0	0	0	0	0	0	0	0	0	0	0	0	0	0	0	0	0	0	0	0	0	0	0	0	0	0	0	0	0	0	0	0	0	0		1
Angola	450304	462437	476753	492578	509071	525759	539635	553980	569296	586192	604968	623682	644811	667826	692124	717345	740821	765616	791720	819266	848387	876154	906215	938367	972285	1.00781e+06	1.04361e+06	1.0808e+06	1.11967e+06	1.16069e+06	1.20398e+06	1.24563e+06	1.28996e+06	1.33653e+06	1.38462e+06	1.43386e+06	1.48181e+06	1.53134e+06	1.58243e+06	1.63524e+06	1.68985e+06		1
Antigua and Barbuda	0	0	0	0	0	0	0	0	0	0	0	0	0	0	0	0	0	0	0	0	0	0	0	0	0	0	0	0	0	0	0	0	0	0	0	0	0	0	0	0	0		2
Argentina	0	0	0	0	0	0	0	0	0	0	0	0	0	0	0	0	0	0	0	0	0	0	0	0	0	0	0	0	0	0	0	0	0	0	0	0	0	0	0	0	0		2
Armenia	0	0	0	0	0	0	0	0	0	0	0	0	0	0	0	0	0	0	0	0	0	0	0	0	0	0	0	0	0	0	0	0	0	0	0	0	0	0	0	0	0		5
Australia	0	0	0	0	0	0	0	0	0	0	0	0	0	0	0	0	0	0	0	0	0	0	0	0	0	0	0	0	0	0	0	0	0	0	0	0	0	0	0	0	0		6
Austria	0	0	0	0	0	0	0	0	0	0	0	0	0	0	0	0	0	0	0	0	0	0	0	0	0	0	0	0	0	0	0	0	0	0	0	0	0	0	0	0	0		5
Azerbaijan	0	0	0	0	0	0	0	0	0	0	0	0	0	0	0	0	0	0	0	0	0	0	0	0	0	0	0	0	0	0	0	0	0	0	0	0	0	0	0	0	0		5
Bahrain	0	0	0	0	0	0	0	0	0	0	0	0	0	0	0	0	0	0	0	0	0	0	0	0	0	0	0	0	0	0	0	0	0	0	0	0	0	0	0	0	0		4
Bangladesh	0	0	0	0	0	0	0	0	0	0	0	0	0	0	0	0	0	0	0	0	0	0	0	0	0	0	0	0	0	0	0	0	0	0	0	0	0	0	0	0	0		3
Barbados	0	0	0	0	0	0	0	0	0	0	0	0	0	0	0	0	0	0	0	0	0	0	0	0	0	0	0	0	0	0	0	0	0	0	0	0	0	0	0	0	0		2
Belarus	0	0	0	0	0	0	0	0	0	0	0	0	0	0	0	0	0	0	0	0	0	0	0	0	0	0	0	0	0	0	0	0	0	0	0	0	0	0	0	0	0		5
Belgium	0	0	0	0	0	0	0	0	0	0	0	0	0	0	0	0	0	0	0	0	0	0	0	0	0	0	0	0	0	0	0	0	0	0	0	0	0	0	0	0	0		5
Belize	0	0	0	0	0	0	0	0	0	0	0	0	0	0	0	0	0	0	0	0	0	0	0	0	0	0	0	0	0	0	0	0	0	0	0	0	0	0	0	0	0		2
Benin	631278	657086	685954	716762	748088	778998	802952	826553	850713	876724	905511	939006	975719	1.01505e+06	1.05622e+06	1.09861e+06	1.1386e+06	1.18022e+06	1.22319e+06	1.26731e+06	1.31249e+06	1.35547e+06	1.39961e+06	1.4451e+06	1.49226e+06	1.54127e+06	1.59036e+06	1.6414e+06	1.69431e+06	1.74898e+06	1.80527e+06	1.86076e+06	1.91816e+06	1.97722e+06	2.0377e+06	2.09944e+06	2.16007e+06	2.22218e+06	2.28567e+06	2.35049e+06	2.41659e+06		1
Bhutan	0	0	0	0	0	0	0	0	0	0	0	0	0	0	0	0	0	0	0	0	0	0	0	0	0	0	0	0	0	0	0	0	0	0	0	0	0	0	0	0	0		3
Bolivia	0	0	0	0	0	0	0	0	0	0	0	0	0	0	0	0	0	0	0	0	0	0	0	0	0	0	0	0	0	0	0	0	0	0	0	0	0	0	0	0	0		2
Bosnia and Herzegovina	0	0	0	0	0	0	0	0	0	0	0	0	0	0	0	0	0	0	0	0	0	0	0	0	0	0	0	0	0	0	0	0	0	0	0	0	0	0	0	0	0		5
Botswana	0	0	0	0	0	0	0	0	0	0	0	0	0	0	0	0	0	0	0	0	0	0	0	0	0	0	0	0	0	0	0	0	0	0	0	0	0	0	0	0	0		1
Brazil	0	0	0	0	0	0	0	0	0	0	0	0	0	0	0	0	0	0	0	0	0	0	0	0	0	0	0	0	0	0	0	0	0	0	0	0	0	0	0	0	0		2
Brunei	0	0	0	0	0	0	0	0	0	0	0	0	0	0	0	0	0	0	0	0	0	0	0	0	0	0	0	0	0	0	0	0	0	0	0	0	0	0	0	0	0		6
Bulgaria	0	0	0	0	0	0	0	0	0	0	0	0	0	0	0	0	0	0	0	0	0	0	0	0	0	0	0	0	0	0	0	0	0	0	0	0	0	0	0	0	0		5
Burkina Faso	556863	570735	585789	602036	619463	638036	655686	674795	695234	716834	739524	761705	785412	810571	837152	865163	892828	922314	953540	986460	1.02107e+06	1.05489e+06	1.09089e+06	1.12892e+06	1.16884e+06	1.21057e+06	1.25194e+06	1.29535e+06	1.34078e+06	1.38828e+06	1.43785e+06	1.48665e+06	1.53783e+06	1.59116e+06	1.64637e+06	1.70329e+06	1.75908e+06	1.81692e+06	1.87668e+06	1.93831e+06	2.00177e+06		1
Burundi	166304	168240	170198	172243	174430	176851	179421	182174	185400	189445	194522	202720	212070	222319	233075	244015	254765	265680	276654	287606	298467	307021	315761	324672	333792	343233	352556	362394	372810	383923	395816	407798	420665	434412	448982	464331	479800	496057	513075	530787	549111		1
Cambodia	0	0	0	0	0	0	0	0	0	0	0	0	0	0	0	0	0	0	0	0	0	0	0	0	0	0	0	0	0	0	0	0	0	0	0	0	0	0	0	0	0		6
Cameroon	3.58882e+06	3.68885e+06	3.7945e+06	3.90596e+06	4.02393e+06	4.14878e+06	4.26944e+06	4.39776e+06	4.53343e+06	4.67556e+06	4.82345e+06	4.96598e+06	5.11422e+06	5.26858e+06	5.42984e+06	5.59826e+06	5.76023e+06	5.93222e+06	6.11256e+06	6.29915e+06	6.49104e+06	6.67905e+06	6.87433e+06	7.07703e+06	7.28797e+06	7.50761e+06	7.72499e+06	7.95206e+06	8.18846e+06	8.43364e+06	8.68721e+06	8.93821e+06	9.19893e+06	9.46888e+06	9.74738e+06	1.00339e+07	1.03184e+07	1.06119e+07	1.09139e+07	1.1224e+07	1.15416e+07		1
Canada	0	0	0	0	0	0	0	0	0	0	0	0	0	0	0	0	0	0	0	0	0	0	0	0	0	0	0	0	0	0	0	0	0	0	0	0	0	0	0	0	0		2
Cape Verde	0	0	0	0	0	0	0	0	0	0	0	0	0	0	0	0	0	0	0	0	0	0	0	0	0	0	0	0	0	0	0	0	0	0	0	0	0	0	0	0	0		1
Central African Republic	267656	273333	279917	287198	294860	302679	309637	316652	323760	331057	338578	344378	350592	357210	364212	371658	379689	388443	397846	407818	418269	428794	439674	450946	462702	474958	486270	498372	511027	523921	536917	549562	562425	575573	589176	603316	617136	631561	646516	661873	677551		1
Chad	604525	620599	637731	656062	675798	697067	717164	739254	763442	789852	818514	847216	878717	912285	947146	982913	1.01577e+06	1.04951e+06	1.08452e+06	1.12131e+06	1.16021e+06	1.19797e+06	1.23826e+06	1.28094e+06	1.32585e+06	1.37289e+06	1.41896e+06	1.46772e+06	1.51918e+06	1.5734e+06	1.6304e+06	1.68691e+06	1.74686e+06	1.8099e+06	1.87562e+06	1.94378e+06	2.01111e+06	2.0813e+06	2.15428e+06	2.23001e+06	2.30846e+06		1
Chile	0	0	0	0	0	0	0	0	0	0	0	0	0	0	0	0	0	0	0	0	0	0	0	0	0	0	0	0	0	0	0	0	0	0	0	0	0	0	0	0	0		2
China	0	0	0	0	0	0	0	0	0	0	0	0	0	0	0	0	0	0	0	0	0	0	0	0	0	0	0	0	0	0	0	0	0	0	0	0	0	0	0	0	0		6
Colombia	0	0	0	0	0	0	0	0	0	0	0	0	0	0	0	0	0	0	0	0	0	0	0	0	0	0	0	0	0	0	0	0	0	0	0	0	0	0	0	0	0		2
Comoros	0	0	0	0	0	0	0	0	0	0	0	0	0	0	0	0	0	0	0	0	0	0	0	0	0	0	0	0	0	0	0	0	0	0	0	0	0	0	0	0	0		1
Congo	211238	217531	224124	231042	238291	245864	253584	261622	269861	278174	286475	293468	300552	307889	315682	324092	333751	344128	355006	366135	377319	386935	396609	406447	416616	427273	437874	449213	461263	473955	487271	501803	516849	532500	548879	565987	582932	600657	619014	637771	656808		1
Costa Rica	0	0	0	0	0	0	0	0	0	0	0	0	0	0	0	0	0	0	0	0	0	0	0	0	0	0	0	0	0	0	0	0	0	0	0	0	0	0	0	0	0		2
Côte d’Ivoire	1.81446e+06	1.8799e+06	1.94922e+06	2.02164e+06	2.09583e+06	2.17057e+06	2.23542e+06	2.29974e+06	2.36231e+06	2.42186e+06	2.4775e+06	2.51295e+06	2.54436e+06	2.57351e+06	2.60258e+06	2.63355e+06	2.67452e+06	2.71836e+06	2.76602e+06	2.81806e+06	2.87422e+06	2.94136e+06	3.01183e+06	3.08535e+06	3.16172e+06	3.24031e+06	3.31199e+06	3.38965e+06	3.47081e+06	3.552e+06	3.63187e+06	3.71697e+06	3.79941e+06	3.88182e+06	3.96844e+06	4.06112e+06	4.15688e+06	4.25869e+06	4.36551e+06	4.47486e+06	4.58531e+06		1
Croatia	0	0	0	0	0	0	0	0	0	0	0	0	0	0	0	0	0	0	0	0	0	0	0	0	0	0	0	0	0	0	0	0	0	0	0	0	0	0	0	0	0		5
Cuba	0	0	0	0	0	0	0	0	0	0	0	0	0	0	0	0	0	0	0	0	0	0	0	0	0	0	0	0	0	0	0	0	0	0	0	0	0	0	0	0	0		2
Cyprus	0	0	0	0	0	0	0	0	0	0	0	0	0	0	0	0	0	0	0	0	0	0	0	0	0	0	0	0	0	0	0	0	0	0	0	0	0	0	0	0	0		5
Czech Republic	0	0	0	0	0	0	0	0	0	0	0	0	0	0	0	0	0	0	0	0	0	0	0	0	0	0	0	0	0	0	0	0	0	0	0	0	0	0	0	0	0		5
Democratic Republic of the Congo	1.91423e+06	1.98137e+06	2.05574e+06	2.13312e+06	2.20915e+06	2.28171e+06	2.33411e+06	2.38313e+06	2.43269e+06	2.48704e+06	2.54886e+06	2.61375e+06	2.68798e+06	2.76998e+06	2.85819e+06	2.95147e+06	3.03824e+06	3.1324e+06	3.23298e+06	3.33867e+06	3.44875e+06	3.55211e+06	3.66136e+06	3.77622e+06	3.89674e+06	4.02291e+06	4.14271e+06	4.26946e+06	4.40268e+06	4.54189e+06	4.68678e+06	4.82419e+06	4.96916e+06	5.12092e+06	5.27867e+06	5.44193e+06	5.59805e+06	5.7612e+06	5.93091e+06	6.10688e+06	6.28884e+06		1
Denmark	0	0	0	0	0	0	0	0	0	0	0	0	0	0	0	0	0	0	0	0	0	0	0	0	0	0	0	0	0	0	0	0	0	0	0	0	0	0	0	0	0		5
Djibouti	0	0	0	0	0	0	0	0	0	0	0	0	0	0	0	0	0	0	0	0	0	0	0	0	0	0	0	0	0	0	0	0	0	0	0	0	0	0	0	0	0		4
Dominican Republic	0	0	0	0	0	0	0	0	0	0	0	0	0	0	0	0	0	0	0	0	0	0	0	0	0	0	0	0	0	0	0	0	0	0	0	0	0	0	0	0	0		2
Ecuador	0	0	0	0	0	0	0	0	0	0	0	0	0	0	0	0	0	0	0	0	0	0	0	0	0	0	0	0	0	0	0	0	0	0	0	0	0	0	0	0	0		2
Egypt	0	0	0	0	0	0	0	0	0	0	0	0	0	0	0	0	0	0	0	0	0	0	0	0	0	0	0	0	0	0	0	0	0	0	0	0	0	0	0	0	0		4
El Salvador	0	0	0	0	0	0	0	0	0	0	0	0	0	0	0	0	0	0	0	0	0	0	0	0	0	0	0	0	0	0	0	0	0	0	0	0	0	0	0	0	0		2
Equatorial Guinea	862712	879285	898243	919145	941625	965665	991625	1.01929e+06	1.04959e+06	1.08362e+06	1.12181e+06	1.16006e+06	1.20301e+06	1.24961e+06	1.29812e+06	1.34737e+06	1.39176e+06	1.43702e+06	1.48332e+06	1.53135e+06	1.58146e+06	1.62793e+06	1.67766e+06	1.72971e+06	1.78294e+06	1.83688e+06	1.88855e+06	1.94129e+06	1.99541e+06	2.05162e+06	2.11029e+06	2.16687e+06	2.22625e+06	2.28813e+06	2.35199e+06	2.41751e+06	2.48111e+06	2.54675e+06	2.61429e+06	2.68366e+06	2.75474e+06		1
Eritrea	0	0	0	0	0	0	0	0	0	0	0	0	0	0	0	0	0	0	0	0	0	0	0	0	0	0	0	0	0	0	0	0	0	0	0	0	0	0	0	0	0		1
Estonia	0	0	0	0	0	0	0	0	0	0	0	0	0	0	0	0	0	0	0	0	0	0	0	0	0	0	0	0	0	0	0	0	0	0	0	0	0	0	0	0	0		5
Ethiopia	934608	964138	995918	1.02949e+06	1.06428e+06	1.0999e+06	1.13291e+06	1.1664e+06	1.20065e+06	1.23641e+06	1.27434e+06	1.31033e+06	1.34981e+06	1.39203e+06	1.4361e+06	1.48183e+06	1.52948e+06	1.57947e+06	1.63248e+06	1.68914e+06	1.7495e+06	1.8133e+06	1.8801e+06	1.94975e+06	2.02197e+06	2.09643e+06	2.17021e+06	2.24657e+06	2.32493e+06	2.40462e+06	2.48528e+06	2.56496e+06	2.6459e+06	2.72794e+06	2.81109e+06	2.89539e+06	2.97947e+06	3.06459e+06	3.15083e+06	3.23835e+06	3.32715e+06		1
Federated States of Micronesia	0	0	0	0	0	0	0	0	0	0	0	0	0	0	0	0	0	0	0	0	0	0	0	0	0	0	0	0	0	0	0	0	0	0	0	0	0	0	0	0	0		6
Fiji	0	0	0	0	0	0	0	0	0	0	0	0	0	0	0	0	0	0	0	0	0	0	0	0	0	0	0	0	0	0	0	0	0	0	0	0	0	0	0	0	0		6
Finland	0	0	0	0	0	0	0	0	0	0	0	0	0	0	0	0	0	0	0	0	0	0	0	0	0	0	0	0	0	0	0	0	0	0	0	0	0	0	0	0	0		5
France	0	0	0	0	0	0	0	0	0	0	0	0	0	0	0	0	0	0	0	0	0	0	0	0	0	0	0	0	0	0	0	0	0	0	0	0	0	0	0	0	0		5
Gabon	0	0	0	0	0	0	0	0	0	0	0	0	0	0	0	0	0	0	0	0	0	0	0	0	0	0	0	0	0	0	0	0	0	0	0	0	0	0	0	0	0		1
Georgia	0	0	0	0	0	0	0	0	0	0	0	0	0	0	0	0	0	0	0	0	0	0	0	0	0	0	0	0	0	0	0	0	0	0	0	0	0	0	0	0	0		5
Germany	0	0	0	0	0	0	0	0	0	0	0	0	0	0	0	0	0	0	0	0	0	0	0	0	0	0	0	0	0	0	0	0	0	0	0	0	0	0	0	0	0		5
Ghana	994833	1.02486e+06	1.05612e+06	1.08836e+06	1.12138e+06	1.15511e+06	1.18682e+06	1.21961e+06	1.25349e+06	1.28834e+06	1.32406e+06	1.35989e+06	1.39604e+06	1.43295e+06	1.47127e+06	1.51134e+06	1.55034e+06	1.59186e+06	1.63543e+06	1.6802e+06	1.72569e+06	1.77209e+06	1.81949e+06	1.8677e+06	1.91682e+06	1.96699e+06	2.01861e+06	2.07123e+06	2.12502e+06	2.18015e+06	2.23667e+06	2.29446e+06	2.35343e+06	2.41358e+06	2.47481e+06	2.53696e+06	2.59908e+06	2.66214e+06	2.72587e+06	2.78991e+06	2.85406e+06		1
Greece	0	0	0	0	0	0	0	0	0	0	0	0	0	0	0	0	0	0	0	0	0	0	0	0	0	0	0	0	0	0	0	0	0	0	0	0	0	0	0	0	0		5
Grenada	0	0	0	0	0	0	0	0	0	0	0	0	0	0	0	0	0	0	0	0	0	0	0	0	0	0	0	0	0	0	0	0	0	0	0	0	0	0	0	0	0		2
Guatemala	0	0	0	0	0	0	0	0	0	0	0	0	0	0	0	0	0	0	0	0	0	0	0	0	0	0	0	0	0	0	0	0	0	0	0	0	0	0	0	0	0		2
Guinea	354360	372612	394220	417291	439642	460033	474480	486223	496300	506026	516309	525621	535515	546277	558191	571403	585930	602417	620409	639349	658874	678076	698132	718972	740557	762871	785001	807933	831647	856151	881440	906470	932408	959178	986687	1.01487e+06	1.0427e+06	1.0713e+06	1.10061e+06	1.13061e+06	1.16124e+06		1
Guinea-Bissau	48160.7	49470.8	50646.8	51748	52927	54256.4	55438.8	56795.4	58291.7	59856.1	61457.2	63045	64696.3	66399.6	68154.2	69955.6	71572.3	73262	75047.9	76960	79019.7	81088.1	83352.1	85762.8	88261.2	90810.9	93223.8	95714	98287.5	100960	103742	106428	109241	112164	115179	118275	121249	124330	127513	130793	134166		1
Guyana	0	0	0	0	0	0	0	0	0	0	0	0	0	0	0	0	0	0	0	0	0	0	0	0	0	0	0	0	0	0	0	0	0	0	0	0	0	0	0	0	0		2
Haiti	0	0	0	0	0	0	0	0	0	0	0	0	0	0	0	0	0	0	0	0	0	0	0	0	0	0	0	0	0	0	0	0	0	0	0	0	0	0	0	0	0		2
Honduras	0	0	0	0	0	0	0	0	0	0	0	0	0	0	0	0	0	0	0	0	0	0	0	0	0	0	0	0	0	0	0	0	0	0	0	0	0	0	0	0	0		2
Hungary	0	0	0	0	0	0	0	0	0	0	0	0	0	0	0	0	0	0	0	0	0	0	0	0	0	0	0	0	0	0	0	0	0	0	0	0	0	0	0	0	0		5
Iceland	0	0	0	0	0	0	0	0	0	0	0	0	0	0	0	0	0	0	0	0	0	0	0	0	0	0	0	0	0	0	0	0	0	0	0	0	0	0	0	0	0		5
India	0	0	0	0	0	0	0	0	0	0	0	0	0	0	0	0	0	0	0	0	0	0	0	0	0	0	0	0	0	0	0	0	0	0	0	0	0	0	0	0	0		3
Indonesia	0	0	0	0	0	0	0	0	0	0	0	0	0	0	0	0	0	0	0	0	0	0	0	0	0	0	0	0	0	0	0	0	0	0	0	0	0	0	0	0	0		3
Iran	0	0	0	0	0	0	0	0	0	0	0	0	0	0	0	0	0	0	0	0	0	0	0	0	0	0	0	0	0	0	0	0	0	0	0	0	0	0	0	0	0		4
Iraq	0	0	0	0	0	0	0	0	0	0	0	0	0	0	0	0	0	0	0	0	0	0	0	0	0	0	0	0	0	0	0	0	0	0	0	0	0	0	0	0	0		4
Ireland	0	0	0	0	0	0	0	0	0	0	0	0	0	0	0	0	0	0	0	0	0	0	0	0	0	0	0	0	0	0	0	0	0	0	0	0	0	0	0	0	0		5
Israel	0	0	0	0	0	0	0	0	0	0	0	0	0	0	0	0	0	0	0	0	0	0	0	0	0	0	0	0	0	0	0	0	0	0	0	0	0	0	0	0	0		5
Italy	0	0	0	0	0	0	0	0	0	0	0	0	0	0	0	0	0	0	0	0	0	0	0	0	0	0	0	0	0	0	0	0	0	0	0	0	0	0	0	0	0		5
Jamaica	0	0	0	0	0	0	0	0	0	0	0	0	0	0	0	0	0	0	0	0	0	0	0	0	0	0	0	0	0	0	0	0	0	0	0	0	0	0	0	0	0		2
Japan	0	0	0	0	0	0	0	0	0	0	0	0	0	0	0	0	0	0	0	0	0	0	0	0	0	0	0	0	0	0	0	0	0	0	0	0	0	0	0	0	0		6
Jordan	0	0	0	0	0	0	0	0	0	0	0	0	0	0	0	0	0	0	0	0	0	0	0	0	0	0	0	0	0	0	0	0	0	0	0	0	0	0	0	0	0		4
Kazakhstan	0	0	0	0	0	0	0	0	0	0	0	0	0	0	0	0	0	0	0	0	0	0	0	0	0	0	0	0	0	0	0	0	0	0	0	0	0	0	0	0	0		5
Kenya	0	0	0	0	0	0	0	0	0	0	0	0	0	0	0	0	0	0	0	0	0	0	0	0	0	0	0	0	0	0	0	0	0	0	0	0	0	0	0	0	0		1
Kiribati	0	0	0	0	0	0	0	0	0	0	0	0	0	0	0	0	0	0	0	0	0	0	0	0	0	0	0	0	0	0	0	0	0	0	0	0	0	0	0	0	0		6
Kuwait	0	0	0	0	0	0	0	0	0	0	0	0	0	0	0	0	0	0	0	0	0	0	0	0	0	0	0	0	0	0	0	0	0	0	0	0	0	0	0	0	0		4
Kyrgyzstan	0	0	0	0	0	0	0	0	0	0	0	0	0	0	0	0	0	0	0	0	0	0	0	0	0	0	0	0	0	0	0	0	0	0	0	0	0	0	0	0	0		5
Laos	0	0	0	0	0	0	0	0	0	0	0	0	0	0	0	0	0	0	0	0	0	0	0	0	0	0	0	0	0	0	0	0	0	0	0	0	0	0	0	0	0		6
Latvia	0	0	0	0	0	0	0	0	0	0	0	0	0	0	0	0	0	0	0	0	0	0	0	0	0	0	0	0	0	0	0	0	0	0	0	0	0	0	0	0	0		5
Lebanon	0	0	0	0	0	0	0	0	0	0	0	0	0	0	0	0	0	0	0	0	0	0	0	0	0	0	0	0	0	0	0	0	0	0	0	0	0	0	0	0	0		4
Lesotho	0	0	0	0	0	0	0	0	0	0	0	0	0	0	0	0	0	0	0	0	0	0	0	0	0	0	0	0	0	0	0	0	0	0	0	0	0	0	0	0	0		1
Liberia	222550	219119	216121	214958	217286	223847	237430	256451	278130	299111	317352	328765	336726	343106	350300	359813	372442	387668	404386	421258	437502	452093	465884	479442	493474	508414	523963	540323	557425	575114	593272	611435	630187	649446	669112	689121	709089	729458	750201	771314	792786		1
Libya	0	0	0	0	0	0	0	0	0	0	0	0	0	0	0	0	0	0	0	0	0	0	0	0	0	0	0	0	0	0	0	0	0	0	0	0	0	0	0	0	0		4
Lithuania	0	0	0	0	0	0	0	0	0	0	0	0	0	0	0	0	0	0	0	0	0	0	0	0	0	0	0	0	0	0	0	0	0	0	0	0	0	0	0	0	0		5
Luxembourg	0	0	0	0	0	0	0	0	0	0	0	0	0	0	0	0	0	0	0	0	0	0	0	0	0	0	0	0	0	0	0	0	0	0	0	0	0	0	0	0	0		5
Macedonia	0	0	0	0	0	0	0	0	0	0	0	0	0	0	0	0	0	0	0	0	0	0	0	0	0	0	0	0	0	0	0	0	0	0	0	0	0	0	0	0	0		5
Madagascar	0	0	0	0	0	0	0	0	0	0	0	0	0	0	0	0	0	0	0	0	0	0	0	0	0	0	0	0	0	0	0	0	0	0	0	0	0	0	0	0	0		1
Malawi	112401	115513	117544	119014	120601	122740	124494	127125	130346	133802	137292	140690	144204	147931	151983	156402	161214	166272	171595	177246	183251	188975	195385	202265	209292	216327	223787	231034	238333	246113	254564	262860	271920	281539	291361	301205	310979	320849	330867	341185	351884		1
Malaysia	0	0	0	0	0	0	0	0	0	0	0	0	0	0	0	0	0	0	0	0	0	0	0	0	0	0	0	0	0	0	0	0	0	0	0	0	0	0	0	0	0		6
Maldives	0	0	0	0	0	0	0	0	0	0	0	0	0	0	0	0	0	0	0	0	0	0	0	0	0	0	0	0	0	0	0	0	0	0	0	0	0	0	0	0	0		3
Mali	151905	154772	158437	162723	167396	172293	176724	181464	186524	191950	197780	203528	209805	216531	223631	231068	238121	245642	253539	261713	270117	277300	284772	292654	301119	310298	319807	330256	341530	353473	366000	378415	391518	405330	419910	435293	450503	466654	483673	501455	519954		1
Malta	0	0	0	0	0	0	0	0	0	0	0	0	0	0	0	0	0	0	0	0	0	0	0	0	0	0	0	0	0	0	0	0	0	0	0	0	0	0	0	0	0		5
Mauritania	0	0	0	0	0	0	0	0	0	0	0	0	0	0	0	0	0	0	0	0	0	0	0	0	0	0	0	0	0	0	0	0	0	0	0	0	0	0	0	0	0		1
Mauritius	0	0	0	0	0	0	0	0	0	0	0	0	0	0	0	0	0	0	0	0	0	0	0	0	0	0	0	0	0	0	0	0	0	0	0	0	0	0	0	0	0		1
Mexico	0	0	0	0	0	0	0	0	0	0	0	0	0	0	0	0	0	0	0	0	0	0	0	0	0	0	0	0	0	0	0	0	0	0	0	0	0	0	0	0	0		2
Moldova	0	0	0	0	0	0	0	0	0	0	0	0	0	0	0	0	0	0	0	0	0	0	0	0	0	0	0	0	0	0	0	0	0	0	0	0	0	0	0	0	0		5
Mongolia	0	0	0	0	0	0	0	0	0	0	0	0	0	0	0	0	0	0	0	0	0	0	0	0	0	0	0	0	0	0	0	0	0	0	0	0	0	0	0	0	0		6
Montenegro	0	0	0	0	0	0	0	0	0	0	0	0	0	0	0	0	0	0	0	0	0	0	0	0	0	0	0	0	0	0	0	0	0	0	0	0	0	0	0	0	0		5
Morocco	0	0	0	0	0	0	0	0	0	0	0	0	0	0	0	0	0	0	0	0	0	0	0	0	0	0	0	0	0	0	0	0	0	0	0	0	0	0	0	0	0		4
Mozambique	0	0	0	0	0	0	0	0	0	0	0	0	0	0	0	0	0	0	0	0	0	0	0	0	0	0	0	0	0	0	0	0	0	0	0	0	0	0	0	0	0		1
Myanmar	0	0	0	0	0	0	0	0	0	0	0	0	0	0	0	0	0	0	0	0	0	0	0	0	0	0	0	0	0	0	0	0	0	0	0	0	0	0	0	0	0		3
Namibia	0	0	0	0	0	0	0	0	0	0	0	0	0	0	0	0	0	0	0	0	0	0	0	0	0	0	0	0	0	0	0	0	0	0	0	0	0	0	0	0	0		1
Nepal	0	0	0	0	0	0	0	0	0	0	0	0	0	0	0	0	0	0	0	0	0	0	0	0	0	0	0	0	0	0	0	0	0	0	0	0	0	0	0	0	0		3
Netherlands	0	0	0	0	0	0	0	0	0	0	0	0	0	0	0	0	0	0	0	0	0	0	0	0	0	0	0	0	0	0	0	0	0	0	0	0	0	0	0	0	0		5
New Zealand	0	0	0	0	0	0	0	0	0	0	0	0	0	0	0	0	0	0	0	0	0	0	0	0	0	0	0	0	0	0	0	0	0	0	0	0	0	0	0	0	0		6
Nicaragua	0	0	0	0	0	0	0	0	0	0	0	0	0	0	0	0	0	0	0	0	0	0	0	0	0	0	0	0	0	0	0	0	0	0	0	0	0	0	0	0	0		2
Niger	13667.4	14106.4	14625.6	15209.3	15839	16505.6	17193.3	17902.7	18627.2	19366.7	20128.4	20793.3	21512	22270.6	23057.1	23872.8	24689.2	25548.5	26450.9	27403.4	28415.2	29459.5	30570.7	31746.1	32983.2	34285.3	35603.3	37005.2	38481.9	40024.6	41634.9	43276.7	44999.5	46803.1	48693.6	50680.1	52711.3	54855.1	57106.2	59460	61920.6		1
Nigeria	8.14725e+06	8.36427e+06	8.59381e+06	8.83593e+06	9.09063e+06	9.35742e+06	9.6096e+06	9.87656e+06	1.01562e+07	1.04455e+07	1.07425e+07	1.10168e+07	1.13035e+07	1.16014e+07	1.19099e+07	1.22287e+07	1.25391e+07	1.28659e+07	1.32077e+07	1.35626e+07	1.39299e+07	1.42987e+07	1.46822e+07	1.50818e+07	1.55001e+07	1.59388e+07	1.63754e+07	1.6841e+07	1.73319e+07	1.78424e+07	1.83702e+07	1.89154e+07	1.9478e+07	2.00618e+07	2.06722e+07	2.13111e+07	2.19622e+07	2.26435e+07	2.33525e+07	2.40843e+07	2.48356e+07		1
North Korea	0	0	0	0	0	0	0	0	0	0	0	0	0	0	0	0	0	0	0	0	0	0	0	0	0	0	0	0	0	0	0	0	0	0	0	0	0	0	0	0	0		3
Norway	0	0	0	0	0	0	0	0	0	0	0	0	0	0	0	0	0	0	0	0	0	0	0	0	0	0	0	0	0	0	0	0	0	0	0	0	0	0	0	0	0		5
Oman	0	0	0	0	0	0	0	0	0	0	0	0	0	0	0	0	0	0	0	0	0	0	0	0	0	0	0	0	0	0	0	0	0	0	0	0	0	0	0	0	0		4
Pakistan	0	0	0	0	0	0	0	0	0	0	0	0	0	0	0	0	0	0	0	0	0	0	0	0	0	0	0	0	0	0	0	0	0	0	0	0	0	0	0	0	0		4
Palestine	0	0	0	0	0	0	0	0	0	0	0	0	0	0	0	0	0	0	0	0	0	0	0	0	0	0	0	0	0	0	0	0	0	0	0	0	0	0	0	0	0		4
Panama	0	0	0	0	0	0	0	0	0	0	0	0	0	0	0	0	0	0	0	0	0	0	0	0	0	0	0	0	0	0	0	0	0	0	0	0	0	0	0	0	0		2
Papua New Guinea	0	0	0	0	0	0	0	0	0	0	0	0	0	0	0	0	0	0	0	0	0	0	0	0	0	0	0	0	0	0	0	0	0	0	0	0	0	0	0	0	0		6
Paraguay	0	0	0	0	0	0	0	0	0	0	0	0	0	0	0	0	0	0	0	0	0	0	0	0	0	0	0	0	0	0	0	0	0	0	0	0	0	0	0	0	0		2
Peru	0	0	0	0	0	0	0	0	0	0	0	0	0	0	0	0	0	0	0	0	0	0	0	0	0	0	0	0	0	0	0	0	0	0	0	0	0	0	0	0	0		2
Philippines	0	0	0	0	0	0	0	0	0	0	0	0	0	0	0	0	0	0	0	0	0	0	0	0	0	0	0	0	0	0	0	0	0	0	0	0	0	0	0	0	0		6
Poland	0	0	0	0	0	0	0	0	0	0	0	0	0	0	0	0	0	0	0	0	0	0	0	0	0	0	0	0	0	0	0	0	0	0	0	0	0	0	0	0	0		5
Portugal	0	0	0	0	0	0	0	0	0	0	0	0	0	0	0	0	0	0	0	0	0	0	0	0	0	0	0	0	0	0	0	0	0	0	0	0	0	0	0	0	0		5
Qatar	0	0	0	0	0	0	0	0	0	0	0	0	0	0	0	0	0	0	0	0	0	0	0	0	0	0	0	0	0	0	0	0	0	0	0	0	0	0	0	0	0		4
Romania	0	0	0	0	0	0	0	0	0	0	0	0	0	0	0	0	0	0	0	0	0	0	0	0	0	0	0	0	0	0	0	0	0	0	0	0	0	0	0	0	0		5
Russia	0	0	0	0	0	0	0	0	0	0	0	0	0	0	0	0	0	0	0	0	0	0	0	0	0	0	0	0	0	0	0	0	0	0	0	0	0	0	0	0	0		5
Rwanda	0	0	0	0	0	0	0	0	0	0	0	0	0	0	0	0	0	0	0	0	0	0	0	0	0	0	0	0	0	0	0	0	0	0	0	0	0	0	0	0	0		1
Saint Lucia	0	0	0	0	0	0	0	0	0	0	0	0	0	0	0	0	0	0	0	0	0	0	0	0	0	0	0	0	0	0	0	0	0	0	0	0	0	0	0	0	0		2
Saint Vincent and the Grenadines	0	0	0	0	0	0	0	0	0	0	0	0	0	0	0	0	0	0	0	0	0	0	0	0	0	0	0	0	0	0	0	0	0	0	0	0	0	0	0	0	0		2
Samoa	0	0	0	0	0	0	0	0	0	0	0	0	0	0	0	0	0	0	0	0	0	0	0	0	0	0	0	0	0	0	0	0	0	0	0	0	0	0	0	0	0		6
São Tomé and Príncipe	0	0	0	0	0	0	0	0	0	0	0	0	0	0	0	0	0	0	0	0	0	0	0	0	0	0	0	0	0	0	0	0	0	0	0	0	0	0	0	0	0		1
Saudi Arabia	0	0	0	0	0	0	0	0	0	0	0	0	0	0	0	0	0	0	0	0	0	0	0	0	0	0	0	0	0	0	0	0	0	0	0	0	0	0	0	0	0		4
Senegal	8148.1	8403.11	8679.95	8970.88	9266.01	9560.12	9796.29	10031.2	10272.9	10531.1	10811.9	11108.6	11429.1	11770.7	12128.6	12498.9	12850.4	13220.8	13608.6	14012.9	14434.2	14887	15357.5	15847.1	16359.8	16897.4	17427.9	17992.2	18585.7	19200.1	19832.4	20484.1	21147.6	21830.6	22543.8	23291.4	24039.3	24821.1	25631.7	26461	27302.9		1
Serbia	0	0	0	0	0	0	0	0	0	0	0	0	0	0	0	0	0	0	0	0	0	0	0	0	0	0	0	0	0	0	0	0	0	0	0	0	0	0	0	0	0		5
Seychelles	0	0	0	0	0	0	0	0	0	0	0	0	0	0	0	0	0	0	0	0	0	0	0	0	0	0	0	0	0	0	0	0	0	0	0	0	0	0	0	0	0		1
Sierra Leone	398780	399637	397975	395127	392651	391550	391485	393335	397735	405399	416509	432102	452520	475553	498579	520027	537023	552001	565798	579591	594166	608224	622695	637744	653517	670045	685673	702366	719895	737901	756157	773323	790922	808926	827356	846196	864046	882421	901241	920416	939870		1
Singapore	0	0	0	0	0	0	0	0	0	0	0	0	0	0	0	0	0	0	0	0	0	0	0	0	0	0	0	0	0	0	0	0	0	0	0	0	0	0	0	0	0		6
Slovakia	0	0	0	0	0	0	0	0	0	0	0	0	0	0	0	0	0	0	0	0	0	0	0	0	0	0	0	0	0	0	0	0	0	0	0	0	0	0	0	0	0		5
Slovenia	0	0	0	0	0	0	0	0	0	0	0	0	0	0	0	0	0	0	0	0	0	0	0	0	0	0	0	0	0	0	0	0	0	0	0	0	0	0	0	0	0		5
Solomon Islands	0	0	0	0	0	0	0	0	0	0	0	0	0	0	0	0	0	0	0	0	0	0	0	0	0	0	0	0	0	0	0	0	0	0	0	0	0	0	0	0	0		6
Somalia	0	0	0	0	0	0	0	0	0	0	0	0	0	0	0	0	0	0	0	0	0	0	0	0	0	0	0	0	0	0	0	0	0	0	0	0	0	0	0	0	0		4
South Africa	0	0	0	0	0	0	0	0	0	0	0	0	0	0	0	0	0	0	0	0	0	0	0	0	0	0	0	0	0	0	0	0	0	0	0	0	0	0	0	0	0		1
South Korea	0	0	0	0	0	0	0	0	0	0	0	0	0	0	0	0	0	0	0	0	0	0	0	0	0	0	0	0	0	0	0	0	0	0	0	0	0	0	0	0	0		6
Spain	0	0	0	0	0	0	0	0	0	0	0	0	0	0	0	0	0	0	0	0	0	0	0	0	0	0	0	0	0	0	0	0	0	0	0	0	0	0	0	0	0		5
Sri Lanka	0	0	0	0	0	0	0	0	0	0	0	0	0	0	0	0	0	0	0	0	0	0	0	0	0	0	0	0	0	0	0	0	0	0	0	0	0	0	0	0	0		3
Sudan	3.36025e+06	3.46504e+06	3.57956e+06	3.7014e+06	3.82764e+06	3.95633e+06	4.07333e+06	4.19476e+06	4.32081e+06	4.45187e+06	4.58862e+06	4.7248e+06	4.86772e+06	5.01813e+06	5.17763e+06	5.34691e+06	5.51536e+06	5.69662e+06	5.88799e+06	6.08573e+06	6.2878e+06	6.48696e+06	6.68976e+06	6.89781e+06	7.1137e+06	7.3387e+06	7.56163e+06	7.79389e+06	8.03432e+06	8.28101e+06	8.53275e+06	8.77895e+06	9.03116e+06	9.28894e+06	9.55214e+06	9.8207e+06	1.00839e+07	1.0353e+07	1.06278e+07	1.09083e+07	1.11944e+07		4
Suriname	0	0	0	0	0	0	0	0	0	0	0	0	0	0	0	0	0	0	0	0	0	0	0	0	0	0	0	0	0	0	0	0	0	0	0	0	0	0	0	0	0		2
Swaziland	0	0	0	0	0	0	0	0	0	0	0	0	0	0	0	0	0	0	0	0	0	0	0	0	0	0	0	0	0	0	0	0	0	0	0	0	0	0	0	0	0		1
Sweden	0	0	0	0	0	0	0	0	0	0	0	0	0	0	0	0	0	0	0	0	0	0	0	0	0	0	0	0	0	0	0	0	0	0	0	0	0	0	0	0	0		5
Switzerland	0	0	0	0	0	0	0	0	0	0	0	0	0	0	0	0	0	0	0	0	0	0	0	0	0	0	0	0	0	0	0	0	0	0	0	0	0	0	0	0	0		5
Syria	0	0	0	0	0	0	0	0	0	0	0	0	0	0	0	0	0	0	0	0	0	0	0	0	0	0	0	0	0	0	0	0	0	0	0	0	0	0	0	0	0		4
Tajikistan	0	0	0	0	0	0	0	0	0	0	0	0	0	0	0	0	0	0	0	0	0	0	0	0	0	0	0	0	0	0	0	0	0	0	0	0	0	0	0	0	0		5
Tanzania	766472	792573	821286	851704	882684	913577	940608	967419	994522	1.02257e+06	1.05195e+06	1.08059e+06	1.1106e+06	1.14207e+06	1.17502e+06	1.20944e+06	1.24429e+06	1.2811e+06	1.31973e+06	1.36013e+06	1.40236e+06	1.44521e+06	1.49092e+06	1.53903e+06	1.589e+06	1.64065e+06	1.69375e+06	1.74834e+06	1.80493e+06	1.86429e+06	1.92675e+06	1.99019e+06	2.05677e+06	2.12628e+06	2.19825e+06	2.27239e+06	2.34726e+06	2.42451e+06	2.50404e+06	2.58585e+06	2.66989e+06		1
Thailand	0	0	0	0	0	0	0	0	0	0	0	0	0	0	0	0	0	0	0	0	0	0	0	0	0	0	0	0	0	0	0	0	0	0	0	0	0	0	0	0	0		3
The Bahamas	0	0	0	0	0	0	0	0	0	0	0	0	0	0	0	0	0	0	0	0	0	0	0	0	0	0	0	0	0	0	0	0	0	0	0	0	0	0	0	0	0		2
The Gambia	0	0	0	0	0	0	0	0	0	0	0	0	0	0	0	0	0	0	0	0	0	0	0	0	0	0	0	0	0	0	0	0	0	0	0	0	0	0	0	0	0		1
Timor-Leste	0	0	0	0	0	0	0	0	0	0	0	0	0	0	0	0	0	0	0	0	0	0	0	0	0	0	0	0	0	0	0	0	0	0	0	0	0	0	0	0	0		3
Togo	99965.4	102151	104348	106628	109079	111773	114988	118484	122237	126203	130338	134570	138985	143563	148279	153115	157812	162685	167708	172850	178099	183348	188718	194229	199935	205867	211746	217956	224443	231119	237943	244927	252020	259285	266811	274632	282445	290565	298937	307470	316107		1
Tonga	0	0	0	0	0	0	0	0	0	0	0	0	0	0	0	0	0	0	0	0	0	0	0	0	0	0	0	0	0	0	0	0	0	0	0	0	0	0	0	0	0		6
Trinidad and Tobago	0	0	0	0	0	0	0	0	0	0	0	0	0	0	0	0	0	0	0	0	0	0	0	0	0	0	0	0	0	0	0	0	0	0	0	0	0	0	0	0	0		2
Tunisia	0	0	0	0	0	0	0	0	0	0	0	0	0	0	0	0	0	0	0	0	0	0	0	0	0	0	0	0	0	0	0	0	0	0	0	0	0	0	0	0	0		4
Turkey	0	0	0	0	0	0	0	0	0	0	0	0	0	0	0	0	0	0	0	0	0	0	0	0	0	0	0	0	0	0	0	0	0	0	0	0	0	0	0	0	0		5
Turkmenistan	0	0	0	0	0	0	0	0	0	0	0	0	0	0	0	0	0	0	0	0	0	0	0	0	0	0	0	0	0	0	0	0	0	0	0	0	0	0	0	0	0		5
Uganda	431493	444583	458189	472328	487071	502503	516586	531651	547760	564936	583212	602220	622439	643872	666596	690643	714974	740902	768297	796980	826903	857508	889585	923153	958305	995092	1.0323e+06	1.07129e+06	1.11203e+06	1.15449e+06	1.19866e+06	1.24334e+06	1.28988e+06	1.33827e+06	1.38843e+06	1.44036e+06	1.49287e+06	1.54725e+06	1.60349e+06	1.66155e+06	1.72144e+06		1
Ukraine	0	0	0	0	0	0	0	0	0	0	0	0	0	0	0	0	0	0	0	0	0	0	0	0	0	0	0	0	0	0	0	0	0	0	0	0	0	0	0	0	0		5
United Arab Emirates	0	0	0	0	0	0	0	0	0	0	0	0	0	0	0	0	0	0	0	0	0	0	0	0	0	0	0	0	0	0	0	0	0	0	0	0	0	0	0	0	0		4
United Kingdom	0	0	0	0	0	0	0	0	0	0	0	0	0	0	0	0	0	0	0	0	0	0	0	0	0	0	0	0	0	0	0	0	0	0	0	0	0	0	0	0	0		5
United States	0	0	0	0	0	0	0	0	0	0	0	0	0	0	0	0	0	0	0	0	0	0	0	0	0	0	0	0	0	0	0	0	0	0	0	0	0	0	0	0	0		2
Uruguay	0	0	0	0	0	0	0	0	0	0	0	0	0	0	0	0	0	0	0	0	0	0	0	0	0	0	0	0	0	0	0	0	0	0	0	0	0	0	0	0	0		2
Uzbekistan	0	0	0	0	0	0	0	0	0	0	0	0	0	0	0	0	0	0	0	0	0	0	0	0	0	0	0	0	0	0	0	0	0	0	0	0	0	0	0	0	0		5
Vanuatu	0	0	0	0	0	0	0	0	0	0	0	0	0	0	0	0	0	0	0	0	0	0	0	0	0	0	0	0	0	0	0	0	0	0	0	0	0	0	0	0	0		6
Venezuela	0	0	0	0	0	0	0	0	0	0	0	0	0	0	0	0	0	0	0	0	0	0	0	0	0	0	0	0	0	0	0	0	0	0	0	0	0	0	0	0	0		2
Vietnam	0	0	0	0	0	0	0	0	0	0	0	0	0	0	0	0	0	0	0	0	0	0	0	0	0	0	0	0	0	0	0	0	0	0	0	0	0	0	0	0	0		6
Yemen	0	0	0	0	0	0	0	0	0	0	0	0	0	0	0	0	0	0	0	0	0	0	0	0	0	0	0	0	0	0	0	0	0	0	0	0	0	0	0	0	0		4
Zambia	0	0	0	0	0	0	0	0	0	0	0	0	0	0	0	0	0	0	0	0	0	0	0	0	0	0	0	0	0	0	0	0	0	0	0	0	0	0	0	0	0		1
Zimbabwe	0	0	0	0	0	0	0	0	0	0	0	0	0	0	0	0	0	0	0	0	0	0	0	0	0	0	0	0	0	0	0	0	0	0	0	0	0	0	0	0	0		1
	0	0	0	0	0	0	0	0	0	0	0	0	0	0	0	0	0	0	0	0	0	0	0	0	0	0	0	0	0	0	0	0	0	0	0	0	0	0	0	0	0
	0	0	0	0	0	0	0	0	0	0	0	0	0	0	0	0	0	0	0	0	0	0	0	0	0	0	0	0	0	0	0	0	0	0	0	0	0	0	0	0	0
	0	0	0	0	0	0	0	0	0	0	0	0	0	0	0	0	0	0	0	0	0	0	0	0	0	0	0	0	0	0	0	0	0	0	0	0	0	0	0	0	0
WOMEN	0	0	0	0	0	0	0	0	0	0	0	0	0	0	0	0	0	0	0	0	0	0	0	0	0	0	0	0	0	0	0	0	0	0	0	0	0	0	0	0	0
Afghanistan	0	0	0	0	0	0	0	0	0	0	0	0	0	0	0	0	0	0	0	0	0	0	0	0	0	0	0	0	0	0	0	0	0	0	0	0	0	0	0	0	0		4
Albania	0	0	0	0	0	0	0	0	0	0	0	0	0	0	0	0	0	0	0	0	0	0	0	0	0	0	0	0	0	0	0	0	0	0	0	0	0	0	0	0	0		5
Algeria	0	0	0	0	0	0	0	0	0	0	0	0	0	0	0	0	0	0	0	0	0	0	0	0	0	0	0	0	0	0	0	0	0	0	0	0	0	0	0	0	0		1
Angola	368753	378713	390412	403271	416565	429897	441067	452476	464584	477946	492836	507868	524796	543214	562646	582792	601573	621385	642197	664078	687116	709153	732918	758248	784895	812747	840957	870179	900658	932776	966643	999412	1.03424e+06	1.07079e+06	1.1085e+06	1.14708e+06	1.18488e+06	1.22387e+06	1.26406e+06	1.30557e+06	1.34849e+06		1
Antigua and Barbuda	0	0	0	0	0	0	0	0	0	0	0	0	0	0	0	0	0	0	0	0	0	0	0	0	0	0	0	0	0	0	0	0	0	0	0	0	0	0	0	0	0		2
Argentina	0	0	0	0	0	0	0	0	0	0	0	0	0	0	0	0	0	0	0	0	0	0	0	0	0	0	0	0	0	0	0	0	0	0	0	0	0	0	0	0	0		2
Armenia	0	0	0	0	0	0	0	0	0	0	0	0	0	0	0	0	0	0	0	0	0	0	0	0	0	0	0	0	0	0	0	0	0	0	0	0	0	0	0	0	0		5
Australia	0	0	0	0	0	0	0	0	0	0	0	0	0	0	0	0	0	0	0	0	0	0	0	0	0	0	0	0	0	0	0	0	0	0	0	0	0	0	0	0	0		6
Austria	0	0	0	0	0	0	0	0	0	0	0	0	0	0	0	0	0	0	0	0	0	0	0	0	0	0	0	0	0	0	0	0	0	0	0	0	0	0	0	0	0		5
Azerbaijan	0	0	0	0	0	0	0	0	0	0	0	0	0	0	0	0	0	0	0	0	0	0	0	0	0	0	0	0	0	0	0	0	0	0	0	0	0	0	0	0	0		5
Bahrain	0	0	0	0	0	0	0	0	0	0	0	0	0	0	0	0	0	0	0	0	0	0	0	0	0	0	0	0	0	0	0	0	0	0	0	0	0	0	0	0	0		4
Bangladesh	0	0	0	0	0	0	0	0	0	0	0	0	0	0	0	0	0	0	0	0	0	0	0	0	0	0	0	0	0	0	0	0	0	0	0	0	0	0	0	0	0		3
Barbados	0	0	0	0	0	0	0	0	0	0	0	0	0	0	0	0	0	0	0	0	0	0	0	0	0	0	0	0	0	0	0	0	0	0	0	0	0	0	0	0	0		2
Belarus	0	0	0	0	0	0	0	0	0	0	0	0	0	0	0	0	0	0	0	0	0	0	0	0	0	0	0	0	0	0	0	0	0	0	0	0	0	0	0	0	0		5
Belgium	0	0	0	0	0	0	0	0	0	0	0	0	0	0	0	0	0	0	0	0	0	0	0	0	0	0	0	0	0	0	0	0	0	0	0	0	0	0	0	0	0		5
Belize	0	0	0	0	0	0	0	0	0	0	0	0	0	0	0	0	0	0	0	0	0	0	0	0	0	0	0	0	0	0	0	0	0	0	0	0	0	0	0	0	0		2
Benin	591038	610735	632162	654759	677877	701119	721469	742100	763366	785762	809668	835735	863514	892812	923417	955145	986393	1.01907e+06	1.05298e+06	1.08789e+06	1.12368e+06	1.15907e+06	1.19543e+06	1.23286e+06	1.27157e+06	1.31166e+06	1.35217e+06	1.39414e+06	1.43749e+06	1.4821e+06	1.52787e+06	1.57367e+06	1.6208e+06	1.66912e+06	1.71851e+06	1.76888e+06	1.81916e+06	1.8706e+06	1.92309e+06	1.97658e+06	2.03104e+06		1
Bhutan	0	0	0	0	0	0	0	0	0	0	0	0	0	0	0	0	0	0	0	0	0	0	0	0	0	0	0	0	0	0	0	0	0	0	0	0	0	0	0	0	0		3
Bolivia	0	0	0	0	0	0	0	0	0	0	0	0	0	0	0	0	0	0	0	0	0	0	0	0	0	0	0	0	0	0	0	0	0	0	0	0	0	0	0	0	0		2
Bosnia and Herzegovina	0	0	0	0	0	0	0	0	0	0	0	0	0	0	0	0	0	0	0	0	0	0	0	0	0	0	0	0	0	0	0	0	0	0	0	0	0	0	0	0	0		5
Botswana	0	0	0	0	0	0	0	0	0	0	0	0	0	0	0	0	0	0	0	0	0	0	0	0	0	0	0	0	0	0	0	0	0	0	0	0	0	0	0	0	0		1
Brazil	0	0	0	0	0	0	0	0	0	0	0	0	0	0	0	0	0	0	0	0	0	0	0	0	0	0	0	0	0	0	0	0	0	0	0	0	0	0	0	0	0		2
Brunei	0	0	0	0	0	0	0	0	0	0	0	0	0	0	0	0	0	0	0	0	0	0	0	0	0	0	0	0	0	0	0	0	0	0	0	0	0	0	0	0	0		6
Bulgaria	0	0	0	0	0	0	0	0	0	0	0	0	0	0	0	0	0	0	0	0	0	0	0	0	0	0	0	0	0	0	0	0	0	0	0	0	0	0	0	0	0		5
Burkina Faso	618171	633013	648956	666025	684246	703605	721721	741321	762213	784160	807050	828709	851732	876035	901596	928431	954434	982090	1.01133e+06	1.04213e+06	1.07449e+06	1.10595e+06	1.13945e+06	1.17486e+06	1.21199e+06	1.25077e+06	1.28914e+06	1.32939e+06	1.37151e+06	1.41556e+06	1.46153e+06	1.5069e+06	1.55448e+06	1.60409e+06	1.65549e+06	1.70852e+06	1.76079e+06	1.81502e+06	1.8711e+06	1.92897e+06	1.98861e+06		1
Burundi	149818	151969	154347	156860	159359	161787	163103	164328	165804	167969	171118	177272	184543	192729	201484	210509	219563	228935	238457	247987	257439	265398	273387	281440	289653	298148	306660	315593	324998	334977	345601	356360	367865	380102	393014	406560	420334	434746	449779	465390	481520		1
Cambodia	0	0	0	0	0	0	0	0	0	0	0	0	0	0	0	0	0	0	0	0	0	0	0	0	0	0	0	0	0	0	0	0	0	0	0	0	0	0	0	0	0		6
Cameroon	3.19475e+06	3.28155e+06	3.37313e+06	3.46951e+06	3.57114e+06	3.67831e+06	3.78192e+06	3.89159e+06	4.00709e+06	4.12775e+06	4.25306e+06	4.37318e+06	4.49787e+06	4.62748e+06	4.76267e+06	4.90369e+06	5.0395e+06	5.18364e+06	5.33471e+06	5.49105e+06	5.65195e+06	5.81081e+06	5.97601e+06	6.14747e+06	6.32574e+06	6.51116e+06	6.69583e+06	6.88837e+06	7.08871e+06	7.29671e+06	7.51218e+06	7.72597e+06	7.94868e+06	8.17955e+06	8.41764e+06	8.66245e+06	8.90786e+06	9.16066e+06	9.42065e+06	9.68783e+06	9.96205e+06		1
Canada	0	0	0	0	0	0	0	0	0	0	0	0	0	0	0	0	0	0	0	0	0	0	0	0	0	0	0	0	0	0	0	0	0	0	0	0	0	0	0	0	0		2
Cape Verde	0	0	0	0	0	0	0	0	0	0	0	0	0	0	0	0	0	0	0	0	0	0	0	0	0	0	0	0	0	0	0	0	0	0	0	0	0	0	0	0	0		1
Central African Republic	241767	247101	253172	259800	266716	273728	280000	286260	292542	298933	305466	310541	315909	321572	327531	333849	340722	348183	356174	364632	373487	382573	391941	401627	411711	422209	432079	442594	453557	464711	475951	487080	498385	509914	521809	534140	546441	559204	572388	585914	599729		1
Chad	509895	522806	536586	551321	567155	584177	600213	617833	637089	658064	680781	703510	728422	754931	782425	810611	836527	863101	890669	919658	950349	980218	1.01216e+06	1.04601e+06	1.08158e+06	1.11879e+06	1.15535e+06	1.194e+06	1.23477e+06	1.2777e+06	1.32281e+06	1.36765e+06	1.41522e+06	1.46521e+06	1.51734e+06	1.57142e+06	1.62504e+06	1.68097e+06	1.73913e+06	1.79945e+06	1.86192e+06		1
Chile	0	0	0	0	0	0	0	0	0	0	0	0	0	0	0	0	0	0	0	0	0	0	0	0	0	0	0	0	0	0	0	0	0	0	0	0	0	0	0	0	0		2
China	0	0	0	0	0	0	0	0	0	0	0	0	0	0	0	0	0	0	0	0	0	0	0	0	0	0	0	0	0	0	0	0	0	0	0	0	0	0	0	0	0		6
Colombia	0	0	0	0	0	0	0	0	0	0	0	0	0	0	0	0	0	0	0	0	0	0	0	0	0	0	0	0	0	0	0	0	0	0	0	0	0	0	0	0	0		2
Comoros	0	0	0	0	0	0	0	0	0	0	0	0	0	0	0	0	0	0	0	0	0	0	0	0	0	0	0	0	0	0	0	0	0	0	0	0	0	0	0	0	0		1
Congo	167306	172193	177306	182656	188240	194048	199943	206058	212304	218589	224850	230154	235508	241046	246936	253310	260678	268613	276939	285455	294008	301486	309001	316635	324520	332776	341047	349873	359239	369095	379432	390747	402463	414645	427381	440671	453918	467759	482082	496715	511572		1
Costa Rica	0	0	0	0	0	0	0	0	0	0	0	0	0	0	0	0	0	0	0	0	0	0	0	0	0	0	0	0	0	0	0	0	0	0	0	0	0	0	0	0	0		2
Côte d’Ivoire	1.3917e+06	1.44678e+06	1.50485e+06	1.56531e+06	1.62719e+06	1.6896e+06	1.74547e+06	1.80089e+06	1.85521e+06	1.90777e+06	1.95809e+06	1.99518e+06	2.03017e+06	2.06406e+06	2.09798e+06	2.13314e+06	2.17614e+06	2.22106e+06	2.2689e+06	2.32043e+06	2.37561e+06	2.44036e+06	2.50801e+06	2.57839e+06	2.65137e+06	2.72643e+06	2.79616e+06	2.87123e+06	2.94956e+06	3.02818e+06	3.10591e+06	3.18792e+06	3.26789e+06	3.34812e+06	3.43227e+06	3.52193e+06	3.61387e+06	3.71117e+06	3.81295e+06	3.9171e+06	4.02237e+06		1
Croatia	0	0	0	0	0	0	0	0	0	0	0	0	0	0	0	0	0	0	0	0	0	0	0	0	0	0	0	0	0	0	0	0	0	0	0	0	0	0	0	0	0		5
Cuba	0	0	0	0	0	0	0	0	0	0	0	0	0	0	0	0	0	0	0	0	0	0	0	0	0	0	0	0	0	0	0	0	0	0	0	0	0	0	0	0	0		2
Cyprus	0	0	0	0	0	0	0	0	0	0	0	0	0	0	0	0	0	0	0	0	0	0	0	0	0	0	0	0	0	0	0	0	0	0	0	0	0	0	0	0	0		5
Czech Republic	0	0	0	0	0	0	0	0	0	0	0	0	0	0	0	0	0	0	0	0	0	0	0	0	0	0	0	0	0	0	0	0	0	0	0	0	0	0	0	0	0		5
Democratic Republic of the Congo	1.72236e+06	1.7794e+06	1.84275e+06	1.90862e+06	1.97306e+06	2.03412e+06	2.07793e+06	2.11844e+06	2.15912e+06	2.20384e+06	2.25507e+06	2.30944e+06	2.37201e+06	2.44137e+06	2.51606e+06	2.59504e+06	2.66937e+06	2.74987e+06	2.83574e+06	2.92599e+06	3.02011e+06	3.10907e+06	3.20331e+06	3.30244e+06	3.40628e+06	3.51475e+06	3.61897e+06	3.72884e+06	3.84406e+06	3.96446e+06	4.08989e+06	4.21026e+06	4.3372e+06	4.47e+06	4.60788e+06	4.75042e+06	4.88827e+06	5.03203e+06	5.1813e+06	5.33588e+06	5.49562e+06		1
Denmark	0	0	0	0	0	0	0	0	0	0	0	0	0	0	0	0	0	0	0	0	0	0	0	0	0	0	0	0	0	0	0	0	0	0	0	0	0	0	0	0	0		5
Djibouti	0	0	0	0	0	0	0	0	0	0	0	0	0	0	0	0	0	0	0	0	0	0	0	0	0	0	0	0	0	0	0	0	0	0	0	0	0	0	0	0	0		4
Dominican Republic	0	0	0	0	0	0	0	0	0	0	0	0	0	0	0	0	0	0	0	0	0	0	0	0	0	0	0	0	0	0	0	0	0	0	0	0	0	0	0	0	0		2
Ecuador	0	0	0	0	0	0	0	0	0	0	0	0	0	0	0	0	0	0	0	0	0	0	0	0	0	0	0	0	0	0	0	0	0	0	0	0	0	0	0	0	0		2
Egypt	0	0	0	0	0	0	0	0	0	0	0	0	0	0	0	0	0	0	0	0	0	0	0	0	0	0	0	0	0	0	0	0	0	0	0	0	0	0	0	0	0		4
El Salvador	0	0	0	0	0	0	0	0	0	0	0	0	0	0	0	0	0	0	0	0	0	0	0	0	0	0	0	0	0	0	0	0	0	0	0	0	0	0	0	0	0		2
Equatorial Guinea	704502	717021	731087	746431	762979	780884	800569	821558	844601	870642	900043	929662	963034	999418	1.03752e+06	1.07651e+06	1.1128e+06	1.1501e+06	1.18846e+06	1.2283e+06	1.26986e+06	1.30913e+06	1.351e+06	1.3948e+06	1.43971e+06	1.48537e+06	1.52949e+06	1.57472e+06	1.62123e+06	1.6695e+06	1.71979e+06	1.76895e+06	1.82036e+06	1.87383e+06	1.92908e+06	1.98595e+06	2.04153e+06	2.09905e+06	2.15832e+06	2.21918e+06	2.28149e+06		1
Eritrea	0	0	0	0	0	0	0	0	0	0	0	0	0	0	0	0	0	0	0	0	0	0	0	0	0	0	0	0	0	0	0	0	0	0	0	0	0	0	0	0	0		1
Estonia	0	0	0	0	0	0	0	0	0	0	0	0	0	0	0	0	0	0	0	0	0	0	0	0	0	0	0	0	0	0	0	0	0	0	0	0	0	0	0	0	0		5
Ethiopia	765862	790234	817012	845610	875170	905108	931039	957408	984491	1.01292e+06	1.04317e+06	1.07266e+06	1.1047e+06	1.13875e+06	1.17426e+06	1.21116e+06	1.25034e+06	1.29136e+06	1.33463e+06	1.38051e+06	1.42908e+06	1.48033e+06	1.53378e+06	1.58942e+06	1.64717e+06	1.70684e+06	1.76627e+06	1.8279e+06	1.89116e+06	1.95536e+06	2.02014e+06	2.08434e+06	2.14935e+06	2.21514e+06	2.28186e+06	2.34965e+06	2.41773e+06	2.48678e+06	2.55684e+06	2.62797e+06	2.7002e+06		1
Federated States of Micronesia	0	0	0	0	0	0	0	0	0	0	0	0	0	0	0	0	0	0	0	0	0	0	0	0	0	0	0	0	0	0	0	0	0	0	0	0	0	0	0	0	0		6
Fiji	0	0	0	0	0	0	0	0	0	0	0	0	0	0	0	0	0	0	0	0	0	0	0	0	0	0	0	0	0	0	0	0	0	0	0	0	0	0	0	0	0		6
Finland	0	0	0	0	0	0	0	0	0	0	0	0	0	0	0	0	0	0	0	0	0	0	0	0	0	0	0	0	0	0	0	0	0	0	0	0	0	0	0	0	0		5
France	0	0	0	0	0	0	0	0	0	0	0	0	0	0	0	0	0	0	0	0	0	0	0	0	0	0	0	0	0	0	0	0	0	0	0	0	0	0	0	0	0		5
Gabon	0	0	0	0	0	0	0	0	0	0	0	0	0	0	0	0	0	0	0	0	0	0	0	0	0	0	0	0	0	0	0	0	0	0	0	0	0	0	0	0	0		1
Georgia	0	0	0	0	0	0	0	0	0	0	0	0	0	0	0	0	0	0	0	0	0	0	0	0	0	0	0	0	0	0	0	0	0	0	0	0	0	0	0	0	0		5
Germany	0	0	0	0	0	0	0	0	0	0	0	0	0	0	0	0	0	0	0	0	0	0	0	0	0	0	0	0	0	0	0	0	0	0	0	0	0	0	0	0	0		5
Ghana	805784	832943	861776	891660	921879	952013	979434	1.00701e+06	1.03535e+06	1.0652e+06	1.09707e+06	1.13383e+06	1.1727e+06	1.21372e+06	1.25692e+06	1.30218e+06	1.34719e+06	1.39469e+06	1.44362e+06	1.49243e+06	1.54006e+06	1.57931e+06	1.61686e+06	1.65332e+06	1.68984e+06	1.72735e+06	1.76799e+06	1.80973e+06	1.85259e+06	1.89646e+06	1.94122e+06	1.98806e+06	2.03578e+06	2.08443e+06	2.13397e+06	2.18428e+06	2.2354e+06	2.28725e+06	2.33962e+06	2.39225e+06	2.44496e+06		1
Greece	0	0	0	0	0	0	0	0	0	0	0	0	0	0	0	0	0	0	0	0	0	0	0	0	0	0	0	0	0	0	0	0	0	0	0	0	0	0	0	0	0		5
Grenada	0	0	0	0	0	0	0	0	0	0	0	0	0	0	0	0	0	0	0	0	0	0	0	0	0	0	0	0	0	0	0	0	0	0	0	0	0	0	0	0	0		2
Guatemala	0	0	0	0	0	0	0	0	0	0	0	0	0	0	0	0	0	0	0	0	0	0	0	0	0	0	0	0	0	0	0	0	0	0	0	0	0	0	0	0	0		2
Guinea	292834	307629	325112	343719	361636	377829	389050	397923	405306	412291	419637	426259	433273	440937	449518	459160	470264	483022	497023	511763	526911	541833	557375	573489	590169	607419	624584	642398	660824	679837	699426	718933	739125	759946	781339	803264	825085	847522	870534	894095	918176		1
Guinea-Bissau	38119.9	39181.8	40133	41019.1	41958.2	43005.5	43948.1	45013.7	46173.2	47367.3	48570.4	49757.2	50967.7	52202	53472	54781.8	56027.3	57335.1	58719.1	60195.5	61776	63399.4	65161.8	67027.7	68954.4	70915.1	72812	74758.9	76763.1	78839.6	80997.9	83126.5	85347.3	87647.9	90011.2	92427	94788.1	97216.8	99713	102281	104919		1
Guyana	0	0	0	0	0	0	0	0	0	0	0	0	0	0	0	0	0	0	0	0	0	0	0	0	0	0	0	0	0	0	0	0	0	0	0	0	0	0	0	0	0		2
Haiti	0	0	0	0	0	0	0	0	0	0	0	0	0	0	0	0	0	0	0	0	0	0	0	0	0	0	0	0	0	0	0	0	0	0	0	0	0	0	0	0	0		2
Honduras	0	0	0	0	0	0	0	0	0	0	0	0	0	0	0	0	0	0	0	0	0	0	0	0	0	0	0	0	0	0	0	0	0	0	0	0	0	0	0	0	0		2
Hungary	0	0	0	0	0	0	0	0	0	0	0	0	0	0	0	0	0	0	0	0	0	0	0	0	0	0	0	0	0	0	0	0	0	0	0	0	0	0	0	0	0		5
Iceland	0	0	0	0	0	0	0	0	0	0	0	0	0	0	0	0	0	0	0	0	0	0	0	0	0	0	0	0	0	0	0	0	0	0	0	0	0	0	0	0	0		5
India	0	0	0	0	0	0	0	0	0	0	0	0	0	0	0	0	0	0	0	0	0	0	0	0	0	0	0	0	0	0	0	0	0	0	0	0	0	0	0	0	0		3
Indonesia	0	0	0	0	0	0	0	0	0	0	0	0	0	0	0	0	0	0	0	0	0	0	0	0	0	0	0	0	0	0	0	0	0	0	0	0	0	0	0	0	0		3
Iran	0	0	0	0	0	0	0	0	0	0	0	0	0	0	0	0	0	0	0	0	0	0	0	0	0	0	0	0	0	0	0	0	0	0	0	0	0	0	0	0	0		4
Iraq	0	0	0	0	0	0	0	0	0	0	0	0	0	0	0	0	0	0	0	0	0	0	0	0	0	0	0	0	0	0	0	0	0	0	0	0	0	0	0	0	0		4
Ireland	0	0	0	0	0	0	0	0	0	0	0	0	0	0	0	0	0	0	0	0	0	0	0	0	0	0	0	0	0	0	0	0	0	0	0	0	0	0	0	0	0		5
Israel	0	0	0	0	0	0	0	0	0	0	0	0	0	0	0	0	0	0	0	0	0	0	0	0	0	0	0	0	0	0	0	0	0	0	0	0	0	0	0	0	0		5
Italy	0	0	0	0	0	0	0	0	0	0	0	0	0	0	0	0	0	0	0	0	0	0	0	0	0	0	0	0	0	0	0	0	0	0	0	0	0	0	0	0	0		5
Jamaica	0	0	0	0	0	0	0	0	0	0	0	0	0	0	0	0	0	0	0	0	0	0	0	0	0	0	0	0	0	0	0	0	0	0	0	0	0	0	0	0	0		2
Japan	0	0	0	0	0	0	0	0	0	0	0	0	0	0	0	0	0	0	0	0	0	0	0	0	0	0	0	0	0	0	0	0	0	0	0	0	0	0	0	0	0		6
Jordan	0	0	0	0	0	0	0	0	0	0	0	0	0	0	0	0	0	0	0	0	0	0	0	0	0	0	0	0	0	0	0	0	0	0	0	0	0	0	0	0	0		4
Kazakhstan	0	0	0	0	0	0	0	0	0	0	0	0	0	0	0	0	0	0	0	0	0	0	0	0	0	0	0	0	0	0	0	0	0	0	0	0	0	0	0	0	0		5
Kenya	0	0	0	0	0	0	0	0	0	0	0	0	0	0	0	0	0	0	0	0	0	0	0	0	0	0	0	0	0	0	0	0	0	0	0	0	0	0	0	0	0		1
Kiribati	0	0	0	0	0	0	0	0	0	0	0	0	0	0	0	0	0	0	0	0	0	0	0	0	0	0	0	0	0	0	0	0	0	0	0	0	0	0	0	0	0		6
Kuwait	0	0	0	0	0	0	0	0	0	0	0	0	0	0	0	0	0	0	0	0	0	0	0	0	0	0	0	0	0	0	0	0	0	0	0	0	0	0	0	0	0		4
Kyrgyzstan	0	0	0	0	0	0	0	0	0	0	0	0	0	0	0	0	0	0	0	0	0	0	0	0	0	0	0	0	0	0	0	0	0	0	0	0	0	0	0	0	0		5
Laos	0	0	0	0	0	0	0	0	0	0	0	0	0	0	0	0	0	0	0	0	0	0	0	0	0	0	0	0	0	0	0	0	0	0	0	0	0	0	0	0	0		6
Latvia	0	0	0	0	0	0	0	0	0	0	0	0	0	0	0	0	0	0	0	0	0	0	0	0	0	0	0	0	0	0	0	0	0	0	0	0	0	0	0	0	0		5
Lebanon	0	0	0	0	0	0	0	0	0	0	0	0	0	0	0	0	0	0	0	0	0	0	0	0	0	0	0	0	0	0	0	0	0	0	0	0	0	0	0	0	0		4
Lesotho	0	0	0	0	0	0	0	0	0	0	0	0	0	0	0	0	0	0	0	0	0	0	0	0	0	0	0	0	0	0	0	0	0	0	0	0	0	0	0	0	0		1
Liberia	179432	176854	174594	173756	175647	180859	191514	206415	223368	239717	253845	262666	268708	273448	278791	285937	295653	307379	320247	333201	345611	356769	367243	377479	388030	399244	410998	423349	436236	449532	463143	476867	490994	505473	520242	535262	550378	565784	581468	597432	613676		1
Libya	0	0	0	0	0	0	0	0	0	0	0	0	0	0	0	0	0	0	0	0	0	0	0	0	0	0	0	0	0	0	0	0	0	0	0	0	0	0	0	0	0		4
Lithuania	0	0	0	0	0	0	0	0	0	0	0	0	0	0	0	0	0	0	0	0	0	0	0	0	0	0	0	0	0	0	0	0	0	0	0	0	0	0	0	0	0		5
Luxembourg	0	0	0	0	0	0	0	0	0	0	0	0	0	0	0	0	0	0	0	0	0	0	0	0	0	0	0	0	0	0	0	0	0	0	0	0	0	0	0	0	0		5
Macedonia	0	0	0	0	0	0	0	0	0	0	0	0	0	0	0	0	0	0	0	0	0	0	0	0	0	0	0	0	0	0	0	0	0	0	0	0	0	0	0	0	0		5
Madagascar	0	0	0	0	0	0	0	0	0	0	0	0	0	0	0	0	0	0	0	0	0	0	0	0	0	0	0	0	0	0	0	0	0	0	0	0	0	0	0	0	0		1
Malawi	94642.9	96692.8	97844	98538.2	99346.5	100634	101899	103863	106295	108908	111531	114067	116678	119442	122447	125728	129310	133073	137032	141234	145698	149936	154686	159784	164987	170187	175692	181028	186397	192123	198352	204470	211161	218274	225542	232833	240111	247466	254940	262647	270651		1
Malaysia	0	0	0	0	0	0	0	0	0	0	0	0	0	0	0	0	0	0	0	0	0	0	0	0	0	0	0	0	0	0	0	0	0	0	0	0	0	0	0	0	0		6
Maldives	0	0	0	0	0	0	0	0	0	0	0	0	0	0	0	0	0	0	0	0	0	0	0	0	0	0	0	0	0	0	0	0	0	0	0	0	0	0	0	0	0		3
Mali	160814	163686	167189	171182	175488	179981	183982	188250	192799	197670	202891	207993	213577	219564	225874	232466	238714	245372	252376	259667	267221	273986	281086	288600	296638	305286	314089	323697	334022	344947	356409	367820	379863	392554	405938	420044	434093	448996	464688	481084	498145		1
Malta	0	0	0	0	0	0	0	0	0	0	0	0	0	0	0	0	0	0	0	0	0	0	0	0	0	0	0	0	0	0	0	0	0	0	0	0	0	0	0	0	0		5
Mauritania	0	0	0	0	0	0	0	0	0	0	0	0	0	0	0	0	0	0	0	0	0	0	0	0	0	0	0	0	0	0	0	0	0	0	0	0	0	0	0	0	0		1
Mauritius	0	0	0	0	0	0	0	0	0	0	0	0	0	0	0	0	0	0	0	0	0	0	0	0	0	0	0	0	0	0	0	0	0	0	0	0	0	0	0	0	0		1
Mexico	0	0	0	0	0	0	0	0	0	0	0	0	0	0	0	0	0	0	0	0	0	0	0	0	0	0	0	0	0	0	0	0	0	0	0	0	0	0	0	0	0		2
Moldova	0	0	0	0	0	0	0	0	0	0	0	0	0	0	0	0	0	0	0	0	0	0	0	0	0	0	0	0	0	0	0	0	0	0	0	0	0	0	0	0	0		5
Mongolia	0	0	0	0	0	0	0	0	0	0	0	0	0	0	0	0	0	0	0	0	0	0	0	0	0	0	0	0	0	0	0	0	0	0	0	0	0	0	0	0	0		6
Montenegro	0	0	0	0	0	0	0	0	0	0	0	0	0	0	0	0	0	0	0	0	0	0	0	0	0	0	0	0	0	0	0	0	0	0	0	0	0	0	0	0	0		5
Morocco	0	0	0	0	0	0	0	0	0	0	0	0	0	0	0	0	0	0	0	0	0	0	0	0	0	0	0	0	0	0	0	0	0	0	0	0	0	0	0	0	0		4
Mozambique	0	0	0	0	0	0	0	0	0	0	0	0	0	0	0	0	0	0	0	0	0	0	0	0	0	0	0	0	0	0	0	0	0	0	0	0	0	0	0	0	0		1
Myanmar	0	0	0	0	0	0	0	0	0	0	0	0	0	0	0	0	0	0	0	0	0	0	0	0	0	0	0	0	0	0	0	0	0	0	0	0	0	0	0	0	0		3
Namibia	0	0	0	0	0	0	0	0	0	0	0	0	0	0	0	0	0	0	0	0	0	0	0	0	0	0	0	0	0	0	0	0	0	0	0	0	0	0	0	0	0		1
Nepal	0	0	0	0	0	0	0	0	0	0	0	0	0	0	0	0	0	0	0	0	0	0	0	0	0	0	0	0	0	0	0	0	0	0	0	0	0	0	0	0	0		3
Netherlands	0	0	0	0	0	0	0	0	0	0	0	0	0	0	0	0	0	0	0	0	0	0	0	0	0	0	0	0	0	0	0	0	0	0	0	0	0	0	0	0	0		5
New Zealand	0	0	0	0	0	0	0	0	0	0	0	0	0	0	0	0	0	0	0	0	0	0	0	0	0	0	0	0	0	0	0	0	0	0	0	0	0	0	0	0	0		6
Nicaragua	0	0	0	0	0	0	0	0	0	0	0	0	0	0	0	0	0	0	0	0	0	0	0	0	0	0	0	0	0	0	0	0	0	0	0	0	0	0	0	0	0		2
Niger	14048.2	14458.9	14908.1	15392.8	15912.5	16466.2	16944.3	17470.3	18036.2	18634.6	19263.2	19817.9	20426.7	21080.7	21773.1	22503	23204	23955.7	24758.8	25616.9	26532.9	27443.3	28420	29462.1	30569.3	31741.3	32898.8	34141.4	35461.8	36851.8	38309	39774.4	41320.2	42948.9	44667	46479.7	48312.4	50256.1	52307.4	54461.8	56719.2		1
Nigeria	6.55834e+06	6.73042e+06	6.91197e+06	7.10248e+06	7.30129e+06	7.50762e+06	7.70381e+06	7.90939e+06	8.12285e+06	8.34232e+06	8.56643e+06	8.7766e+06	8.99519e+06	9.22117e+06	9.45387e+06	9.69299e+06	9.9305e+06	1.01795e+07	1.04388e+07	1.07072e+07	1.09842e+07	1.12677e+07	1.15619e+07	1.18677e+07	1.2187e+07	1.25209e+07	1.28583e+07	1.32173e+07	1.35948e+07	1.39864e+07	1.43899e+07	1.48097e+07	1.52415e+07	1.5688e+07	1.61536e+07	1.66397e+07	1.71376e+07	1.7658e+07	1.81985e+07	1.87549e+07	1.93247e+07		1
North Korea	0	0	0	0	0	0	0	0	0	0	0	0	0	0	0	0	0	0	0	0	0	0	0	0	0	0	0	0	0	0	0	0	0	0	0	0	0	0	0	0	0		3
Norway	0	0	0	0	0	0	0	0	0	0	0	0	0	0	0	0	0	0	0	0	0	0	0	0	0	0	0	0	0	0	0	0	0	0	0	0	0	0	0	0	0		5
Oman	0	0	0	0	0	0	0	0	0	0	0	0	0	0	0	0	0	0	0	0	0	0	0	0	0	0	0	0	0	0	0	0	0	0	0	0	0	0	0	0	0		4
Pakistan	0	0	0	0	0	0	0	0	0	0	0	0	0	0	0	0	0	0	0	0	0	0	0	0	0	0	0	0	0	0	0	0	0	0	0	0	0	0	0	0	0		4
Palestine	0	0	0	0	0	0	0	0	0	0	0	0	0	0	0	0	0	0	0	0	0	0	0	0	0	0	0	0	0	0	0	0	0	0	0	0	0	0	0	0	0		4
Panama	0	0	0	0	0	0	0	0	0	0	0	0	0	0	0	0	0	0	0	0	0	0	0	0	0	0	0	0	0	0	0	0	0	0	0	0	0	0	0	0	0		2
Papua New Guinea	0	0	0	0	0	0	0	0	0	0	0	0	0	0	0	0	0	0	0	0	0	0	0	0	0	0	0	0	0	0	0	0	0	0	0	0	0	0	0	0	0		6
Paraguay	0	0	0	0	0	0	0	0	0	0	0	0	0	0	0	0	0	0	0	0	0	0	0	0	0	0	0	0	0	0	0	0	0	0	0	0	0	0	0	0	0		2
Peru	0	0	0	0	0	0	0	0	0	0	0	0	0	0	0	0	0	0	0	0	0	0	0	0	0	0	0	0	0	0	0	0	0	0	0	0	0	0	0	0	0		2
Philippines	0	0	0	0	0	0	0	0	0	0	0	0	0	0	0	0	0	0	0	0	0	0	0	0	0	0	0	0	0	0	0	0	0	0	0	0	0	0	0	0	0		6
Poland	0	0	0	0	0	0	0	0	0	0	0	0	0	0	0	0	0	0	0	0	0	0	0	0	0	0	0	0	0	0	0	0	0	0	0	0	0	0	0	0	0		5
Portugal	0	0	0	0	0	0	0	0	0	0	0	0	0	0	0	0	0	0	0	0	0	0	0	0	0	0	0	0	0	0	0	0	0	0	0	0	0	0	0	0	0		5
Qatar	0	0	0	0	0	0	0	0	0	0	0	0	0	0	0	0	0	0	0	0	0	0	0	0	0	0	0	0	0	0	0	0	0	0	0	0	0	0	0	0	0		4
Romania	0	0	0	0	0	0	0	0	0	0	0	0	0	0	0	0	0	0	0	0	0	0	0	0	0	0	0	0	0	0	0	0	0	0	0	0	0	0	0	0	0		5
Russia	0	0	0	0	0	0	0	0	0	0	0	0	0	0	0	0	0	0	0	0	0	0	0	0	0	0	0	0	0	0	0	0	0	0	0	0	0	0	0	0	0		5
Rwanda	0	0	0	0	0	0	0	0	0	0	0	0	0	0	0	0	0	0	0	0	0	0	0	0	0	0	0	0	0	0	0	0	0	0	0	0	0	0	0	0	0		1
Saint Lucia	0	0	0	0	0	0	0	0	0	0	0	0	0	0	0	0	0	0	0	0	0	0	0	0	0	0	0	0	0	0	0	0	0	0	0	0	0	0	0	0	0		2
Saint Vincent and the Grenadines	0	0	0	0	0	0	0	0	0	0	0	0	0	0	0	0	0	0	0	0	0	0	0	0	0	0	0	0	0	0	0	0	0	0	0	0	0	0	0	0	0		2
Samoa	0	0	0	0	0	0	0	0	0	0	0	0	0	0	0	0	0	0	0	0	0	0	0	0	0	0	0	0	0	0	0	0	0	0	0	0	0	0	0	0	0		6
São Tomé and Príncipe	0	0	0	0	0	0	0	0	0	0	0	0	0	0	0	0	0	0	0	0	0	0	0	0	0	0	0	0	0	0	0	0	0	0	0	0	0	0	0	0	0		1
Saudi Arabia	0	0	0	0	0	0	0	0	0	0	0	0	0	0	0	0	0	0	0	0	0	0	0	0	0	0	0	0	0	0	0	0	0	0	0	0	0	0	0	0	0		4
Senegal	6198.54	6404.9	6627.18	6861.53	7103.22	7350.01	7577.13	7810.79	8053.41	8307.89	8575.79	8841.13	9120.18	9412.32	9716.71	10032.2	10335.2	10653.8	10985.3	11326	11674.6	12026.1	12385.1	12754.4	13138.8	13541.3	13937.2	14358.2	14800.4	15257.2	15725.8	16206.6	16695.4	17197.5	17721	18268.9	18815.4	19386.2	19977.7	20582.6	21196.6		1
Serbia	0	0	0	0	0	0	0	0	0	0	0	0	0	0	0	0	0	0	0	0	0	0	0	0	0	0	0	0	0	0	0	0	0	0	0	0	0	0	0	0	0		5
Seychelles	0	0	0	0	0	0	0	0	0	0	0	0	0	0	0	0	0	0	0	0	0	0	0	0	0	0	0	0	0	0	0	0	0	0	0	0	0	0	0	0	0		1
Sierra Leone	327143	328179	327190	325273	323707	323322	323614	325503	329517	336234	345805	358847	375786	394803	413734	431273	444835	456646	467426	478165	489527	500456	511700	523408	535715	548649	560766	573769	587472	601567	615861	629187	642858	656863	671238	685975	699817	714102	728779	743781	759048		1
Singapore	0	0	0	0	0	0	0	0	0	0	0	0	0	0	0	0	0	0	0	0	0	0	0	0	0	0	0	0	0	0	0	0	0	0	0	0	0	0	0	0	0		6
Slovakia	0	0	0	0	0	0	0	0	0	0	0	0	0	0	0	0	0	0	0	0	0	0	0	0	0	0	0	0	0	0	0	0	0	0	0	0	0	0	0	0	0		5
Slovenia	0	0	0	0	0	0	0	0	0	0	0	0	0	0	0	0	0	0	0	0	0	0	0	0	0	0	0	0	0	0	0	0	0	0	0	0	0	0	0	0	0		5
Solomon Islands	0	0	0	0	0	0	0	0	0	0	0	0	0	0	0	0	0	0	0	0	0	0	0	0	0	0	0	0	0	0	0	0	0	0	0	0	0	0	0	0	0		6
Somalia	0	0	0	0	0	0	0	0	0	0	0	0	0	0	0	0	0	0	0	0	0	0	0	0	0	0	0	0	0	0	0	0	0	0	0	0	0	0	0	0	0		4
South Africa	0	0	0	0	0	0	0	0	0	0	0	0	0	0	0	0	0	0	0	0	0	0	0	0	0	0	0	0	0	0	0	0	0	0	0	0	0	0	0	0	0		1
South Korea	0	0	0	0	0	0	0	0	0	0	0	0	0	0	0	0	0	0	0	0	0	0	0	0	0	0	0	0	0	0	0	0	0	0	0	0	0	0	0	0	0		6
Spain	0	0	0	0	0	0	0	0	0	0	0	0	0	0	0	0	0	0	0	0	0	0	0	0	0	0	0	0	0	0	0	0	0	0	0	0	0	0	0	0	0		5
Sri Lanka	0	0	0	0	0	0	0	0	0	0	0	0	0	0	0	0	0	0	0	0	0	0	0	0	0	0	0	0	0	0	0	0	0	0	0	0	0	0	0	0	0		3
Sudan	2.75542e+06	2.84116e+06	2.93455e+06	3.03377e+06	3.1366e+06	3.24156e+06	3.33846e+06	3.43907e+06	3.54354e+06	3.65216e+06	3.76546e+06	3.87859e+06	3.99729e+06	4.12202e+06	4.25392e+06	4.39349e+06	4.53217e+06	4.68091e+06	4.83761e+06	4.99938e+06	5.16468e+06	5.32809e+06	5.49445e+06	5.66502e+06	5.8419e+06	6.0261e+06	6.20896e+06	6.39938e+06	6.59637e+06	6.79834e+06	7.00431e+06	7.20626e+06	7.41301e+06	7.62424e+06	7.83991e+06	8.06003e+06	8.27663e+06	8.49808e+06	8.7243e+06	8.95533e+06	9.19122e+06		4
Suriname	0	0	0	0	0	0	0	0	0	0	0	0	0	0	0	0	0	0	0	0	0	0	0	0	0	0	0	0	0	0	0	0	0	0	0	0	0	0	0	0	0		2
Swaziland	0	0	0	0	0	0	0	0	0	0	0	0	0	0	0	0	0	0	0	0	0	0	0	0	0	0	0	0	0	0	0	0	0	0	0	0	0	0	0	0	0		1
Sweden	0	0	0	0	0	0	0	0	0	0	0	0	0	0	0	0	0	0	0	0	0	0	0	0	0	0	0	0	0	0	0	0	0	0	0	0	0	0	0	0	0		5
Switzerland	0	0	0	0	0	0	0	0	0	0	0	0	0	0	0	0	0	0	0	0	0	0	0	0	0	0	0	0	0	0	0	0	0	0	0	0	0	0	0	0	0		5
Syria	0	0	0	0	0	0	0	0	0	0	0	0	0	0	0	0	0	0	0	0	0	0	0	0	0	0	0	0	0	0	0	0	0	0	0	0	0	0	0	0	0		4
Tajikistan	0	0	0	0	0	0	0	0	0	0	0	0	0	0	0	0	0	0	0	0	0	0	0	0	0	0	0	0	0	0	0	0	0	0	0	0	0	0	0	0	0		5
Tanzania	660678	682643	706755	732199	757959	783467	805553	827270	849067	871521	894992	917741	941509	966392	992477	1.01979e+06	1.04766e+06	1.07719e+06	1.10824e+06	1.14078e+06	1.17484e+06	1.20987e+06	1.24729e+06	1.2867e+06	1.32763e+06	1.36991e+06	1.41353e+06	1.45832e+06	1.50473e+06	1.5534e+06	1.60462e+06	1.65687e+06	1.71167e+06	1.76886e+06	1.82804e+06	1.88899e+06	1.95085e+06	2.01466e+06	2.08035e+06	2.14791e+06	2.21731e+06		1
Thailand	0	0	0	0	0	0	0	0	0	0	0	0	0	0	0	0	0	0	0	0	0	0	0	0	0	0	0	0	0	0	0	0	0	0	0	0	0	0	0	0	0		3
The Bahamas	0	0	0	0	0	0	0	0	0	0	0	0	0	0	0	0	0	0	0	0	0	0	0	0	0	0	0	0	0	0	0	0	0	0	0	0	0	0	0	0	0		2
The Gambia	0	0	0	0	0	0	0	0	0	0	0	0	0	0	0	0	0	0	0	0	0	0	0	0	0	0	0	0	0	0	0	0	0	0	0	0	0	0	0	0	0		1
Timor-Leste	0	0	0	0	0	0	0	0	0	0	0	0	0	0	0	0	0	0	0	0	0	0	0	0	0	0	0	0	0	0	0	0	0	0	0	0	0	0	0	0	0		3
Togo	81629.2	84030.4	86551.2	89182.5	91910.7	94734.1	97593.3	100552	103617	106795	110084	113393	116812	120329	123934	127614	131221	134954	138796	142720	146717	150753	154874	159092	163447	167962	172454	177188	182124	187194	192372	197747	203196	208770	214544	220544	226613	232912	239402	246013	252703		1
Tonga	0	0	0	0	0	0	0	0	0	0	0	0	0	0	0	0	0	0	0	0	0	0	0	0	0	0	0	0	0	0	0	0	0	0	0	0	0	0	0	0	0		6
Trinidad and Tobago	0	0	0	0	0	0	0	0	0	0	0	0	0	0	0	0	0	0	0	0	0	0	0	0	0	0	0	0	0	0	0	0	0	0	0	0	0	0	0	0	0		2
Tunisia	0	0	0	0	0	0	0	0	0	0	0	0	0	0	0	0	0	0	0	0	0	0	0	0	0	0	0	0	0	0	0	0	0	0	0	0	0	0	0	0	0		4
Turkey	0	0	0	0	0	0	0	0	0	0	0	0	0	0	0	0	0	0	0	0	0	0	0	0	0	0	0	0	0	0	0	0	0	0	0	0	0	0	0	0	0		5
Turkmenistan	0	0	0	0	0	0	0	0	0	0	0	0	0	0	0	0	0	0	0	0	0	0	0	0	0	0	0	0	0	0	0	0	0	0	0	0	0	0	0	0	0		5
Uganda	370341	381517	393090	405050	417436	430305	441754	453919	466866	480643	495299	510505	526687	543844	562041	581311	600993	621975	644173	667472	691853	717253	743925	771860	801097	831656	862657	895092	928947	964203	1.00086e+06	1.03812e+06	1.07689e+06	1.11718e+06	1.15894e+06	1.20217e+06	1.24611e+06	1.29161e+06	1.33864e+06	1.38717e+06	1.43722e+06		1
Ukraine	0	0	0	0	0	0	0	0	0	0	0	0	0	0	0	0	0	0	0	0	0	0	0	0	0	0	0	0	0	0	0	0	0	0	0	0	0	0	0	0	0		5
United Arab Emirates	0	0	0	0	0	0	0	0	0	0	0	0	0	0	0	0	0	0	0	0	0	0	0	0	0	0	0	0	0	0	0	0	0	0	0	0	0	0	0	0	0		4
United Kingdom	0	0	0	0	0	0	0	0	0	0	0	0	0	0	0	0	0	0	0	0	0	0	0	0	0	0	0	0	0	0	0	0	0	0	0	0	0	0	0	0	0		5
United States	0	0	0	0	0	0	0	0	0	0	0	0	0	0	0	0	0	0	0	0	0	0	0	0	0	0	0	0	0	0	0	0	0	0	0	0	0	0	0	0	0		2
Uruguay	0	0	0	0	0	0	0	0	0	0	0	0	0	0	0	0	0	0	0	0	0	0	0	0	0	0	0	0	0	0	0	0	0	0	0	0	0	0	0	0	0		2
Uzbekistan	0	0	0	0	0	0	0	0	0	0	0	0	0	0	0	0	0	0	0	0	0	0	0	0	0	0	0	0	0	0	0	0	0	0	0	0	0	0	0	0	0		5
Vanuatu	0	0	0	0	0	0	0	0	0	0	0	0	0	0	0	0	0	0	0	0	0	0	0	0	0	0	0	0	0	0	0	0	0	0	0	0	0	0	0	0	0		6
Venezuela	0	0	0	0	0	0	0	0	0	0	0	0	0	0	0	0	0	0	0	0	0	0	0	0	0	0	0	0	0	0	0	0	0	0	0	0	0	0	0	0	0		2
Vietnam	0	0	0	0	0	0	0	0	0	0	0	0	0	0	0	0	0	0	0	0	0	0	0	0	0	0	0	0	0	0	0	0	0	0	0	0	0	0	0	0	0		6
Yemen	0	0	0	0	0	0	0	0	0	0	0	0	0	0	0	0	0	0	0	0	0	0	0	0	0	0	0	0	0	0	0	0	0	0	0	0	0	0	0	0	0		4
Zambia	0	0	0	0	0	0	0	0	0	0	0	0	0	0	0	0	0	0	0	0	0	0	0	0	0	0	0	0	0	0	0	0	0	0	0	0	0	0	0	0	0		1
Zimbabwe	0	0	0	0	0	0	0	0	0	0	0	0	0	0	0	0	0	0	0	0	0	0	0	0	0	0	0	0	0	0	0	0	0	0	0	0	0	0	0	0	0		1
[truncated: 40 more columns]
