# Supplementary material
Source: publisher figshare collection journal article supplement (https://plos.figshare.com/articles/dataset/_/5978128)
Supplement: Supplementary file 1 [file 1 › S3 Table.pdf]

## S6 Publications reporting productivity loss for Chagas Disease

| Author           | Year | Country   | Study design          | Population                           | Sample size | Sequela                                                                      | Definition of productivity loss                             | Results                                                                                                                                                                                                                                                                                                                                                          |
|------------------|------|-----------|-----------------------|--------------------------------------|-------------|------------------------------------------------------------------------------|-------------------------------------------------------------|------------------------------------------------------------------------------------------------------------------------------------------------------------------------------------------------------------------------------------------------------------------------------------------------------------------------------------------------------------------|
| Arata et al.     | 1994 | Bolivia   | report                | NA                                   | NA          | b.chronic heart disease<br>c.heart failure<br>d.digestive disease            | production lost due to chagas morbidity                     | b, c, d. conservative estimate of 25% incapacity is used for chronic Chagas cases in Bolivia<br>1-3% of chronic cases require surgery or sophisticated interventions                                                                                                                                                                                             |
| Basombrío et al. | 1998 | Argentina | Cost-benefit analysis | inhabitants of the province of Salta | NR          | a.acute<br>b.chronic heart disease<br>c.heart failure<br>d.digestive disease | inability to work                                           | a.average 7 days/year<br>b.mild cardiopathy cannot perform physically demanding jobs but can undertake light tasks, only partial incapacity - 14 days/year<br>c.patients with severe cardiopathy are incapable of working<br>d.full working ability for many years, partial incapacity only in advanced stages - 15 days/year<br>5% digestive cases need surgery |
| da Silva et al.  | 1995 | Brazil    | cross sectional       | ambulatory patients                  | 284         | all                                                                          | Percentage economically active per sex and phase of disease | Women<br>Phase I - 22%<br>Phase II - 27.6%<br>Phase III - 5.8%<br>Men<br>Phase I - 22%<br>Phase II - 15.2%<br>Phase III - 7.2%                                                                                                                                                                                                                                   |
| Luquetti et al.  | 1997 | Brazil    | expert report         | cases under evaluation for           | NA          | a.acute<br>b.chronic heart disease                                           | inability to work                                           | b. mild/moderate cardiopathy cases can work in any activity that does not require physical effort and assuming this does not present a                                                                                                                                                                                                                           |

|      |      |        |        |                       |    |                                           |    |                                                                                                                                                                                                                                                                     |
|------|------|--------|--------|-----------------------|----|-------------------------------------------|----|---------------------------------------------------------------------------------------------------------------------------------------------------------------------------------------------------------------------------------------------------------------------|
|      |      |        |        | disability<br>benefit |    | c.heart failure<br>d.digestive<br>disease |    | risk to themselves or others<br>c. severe cardiac cases are entitled to<br>disability benefit and disability retirement<br>d. Digestive forms in principle do not<br>contraindicate any work, only very severe<br>cases or during recovery from eventual<br>surgery |
| PAHO | 2010 | global | report | NA                    | NA | d. digestive<br>disease                   | NR | d. 30% have normal bowel function                                                                                                                                                                                                                                   |
