# Supplementary material
Source: publisher figshare collection journal article supplement (https://plos.figshare.com/articles/dataset/_/5978128)
Supplement: Supplementary file 1 [file 1 › S4 File.xlsm]

## Sheet: Read me
Explanation of this workbook UPDATE 1.1
This workbook calculates the age and sex specific burden of prevalent sequelae of NTDs.
How to use:
1. Decide whether you want to calculate the intervention scenario or the baseline scenario. For the intervention scenario, choose '1' at the place 'scenario' in the 'Assumptions' sheet. For the baseline scenario, fill in '2' at this
For intervention scenarios, also do this:
2. In the assumptions sheet you would need to make assumptions on when the hiostoric interventions started (possible values: 1990-2009). Fill in the desired value in row one, at "STARTYEAR INTERVENTION"
3. In the assumptions sheet you need to make assumptions on the desired endpoint (defined as a fraction of the burden in 2010) and the desired year at which this end-point is first achieved
For both 2 and 3, you can type in values in row one, and these will then apply for both sexes and all countries. However, it is also possible to make country specific assumptions, these are filled in at columns AR, AS, and AT.
3. Import the burden of sequalae from the burden of disease prevalence estimates for 1990 (into sheet 'burden_1990') and for 2010 (into burden_2010). Make sure that you sort the countries in the GBD database alphabetically and that you only select the sequala of interest! You have to paste the complete data into this excel sheet.
IMPORTANT! There are some countries in the GBD prevalence database that are not in the population database. Therefore, you need to delete these before importing the burden. The countries are:
Andorra
Dominica
Marshall Islands
Taiwan
Delete the countries when you have sorted them in alphabetic order as follows: Select the entire row by right-clicking on the row number, and then click 'delete'
Done! Your results are given in the sheet 'TOTAL PREVALENCE 1990-2030
Note
All the other sheets that perform calculations are hidden. To unhide sheets, right click on the sheets-bar below, and click on 'Unhide'

## Sheet: Total cases 15+
	1990	1991	1992	1993	1994	1995	1996	1997	1998	1999	2000	2001	2002	2003	2004	2005	2006	2007	2008	2009	2010	2011	2012	2013	2014	2015	2016	2017	2018	2019	2020	2021	2022	2023	2024	2025	2026	2027	2028	2029	2030		2028	2029	2030
WORLD
Men	2.27103e+06	2.33811e+06	2.39729e+06	2.45956e+06	2.52327e+06	2.58748e+06	2.62851e+06	2.66995e+06	2.71172e+06	2.72119e+06	2.71624e+06	2.70465e+06	2.6705e+06	2.63518e+06	2.59794e+06	2.55814e+06	2.49971e+06	2.43308e+06	2.36231e+06	2.24943e+06	2.12765e+06	2.00504e+06	1.87401e+06	1.734e+06	1.58448e+06	1.42477e+06	1.2513e+06	1.06706e+06	870991	722312	652674	576587	495858	447097	395000	339316	279216	215494	147878	76123.6	0		147878	76123.6	0
Women	1.94209e+06	1.99843e+06	2.04663e+06	2.0972e+06	2.14853e+06	2.1997e+06	2.23184e+06	2.26372e+06	2.29544e+06	2.30119e+06	2.29425e+06	2.28273e+06	2.2525e+06	2.22129e+06	2.18837e+06	2.15314e+06	2.10326e+06	2.04676e+06	1.98666e+06	1.89038e+06	1.78662e+06	1.68459e+06	1.57576e+06	1.45961e+06	1.33569e+06	1.20345e+06	1.06032e+06	908344	746693	623976	564074	498846	429644	387424	342293	294040	242036	186846	128244	66026.5	0		128244	66026.5	0
Total	4.21311e+06	4.33654e+06	4.44391e+06	4.55676e+06	4.67179e+06	4.78718e+06	4.86036e+06	4.93367e+06	5.00715e+06	5.02238e+06	5.01049e+06	4.98738e+06	4.923e+06	4.85647e+06	4.78631e+06	4.71128e+06	4.60297e+06	4.47985e+06	4.34898e+06	4.13981e+06	3.91427e+06	3.68963e+06	3.44978e+06	3.19361e+06	2.92017e+06	2.62822e+06	2.31162e+06	1.9754e+06	1.61768e+06	1.34629e+06	1.21675e+06	1.07543e+06	925501	834521	737293	633356	521252	402340	276122	142150	0		276122	142150	0
MEN
Afghanistan	0	0	0	0	0	0	0	0	0	0	0	0	0	0	0	0	0	0	0	0	0	0	0	0	0	0	0	0	0	0	0	0	0	0	0	0	0	0	0	0	0
Albania	0	0	0	0	0	0	0	0	0	0	0	0	0	0	0	0	0	0	0	0	0	0	0	0	0	0	0	0	0	0	0	0	0	0	0	0	0	0	0	0	0
Algeria	0	0	0	0	0	0	0	0	0	0	0	0	0	0	0	0	0	0	0	0	0	0	0	0	0	0	0	0	0	0	0	0	0	0	0	0	0	0	0	0	0
Angola	10292.2	10569.5	10896.7	11258.4	11635.4	12016.8	12333.9	12661.8	13011.9	13398.1	13827.2	14254.9	14737.9	15263.9	15819.3	16395.7	16173.9	15931.4	15664.1	15370.5	15048.4	13814.4	12502.5	11096.7	9581.6	7945.4	6170.76	4260.44	2206.83	0	0	0	0	0	0	0	0	0	0	0	0
Antigua and Barbuda	0	0	0	0	0	0	0	0	0	0	0	0	0	0	0	0	0	0	0	0	0	0	0	0	0	0	0	0	0	0	0	0	0	0	0	0	0	0	0	0	0
Argentina	0	0	0	0	0	0	0	0	0	0	0	0	0	0	0	0	0	0	0	0	0	0	0	0	0	0	0	0	0	0	0	0	0	0	0	0	0	0	0	0	0
Armenia	0	0	0	0	0	0	0	0	0	0	0	0	0	0	0	0	0	0	0	0	0	0	0	0	0	0	0	0	0	0	0	0	0	0	0	0	0	0	0	0	0
Australia	0	0	0	0	0	0	0	0	0	0	0	0	0	0	0	0	0	0	0	0	0	0	0	0	0	0	0	0	0	0	0	0	0	0	0	0	0	0	0	0	0
Austria	0	0	0	0	0	0	0	0	0	0	0	0	0	0	0	0	0	0	0	0	0	0	0	0	0	0	0	0	0	0	0	0	0	0	0	0	0	0	0	0	0
Azerbaijan	0	0	0	0	0	0	0	0	0	0	0	0	0	0	0	0	0	0	0	0	0	0	0	0	0	0	0	0	0	0	0	0	0	0	0	0	0	0	0	0	0
Bahrain	0	0	0	0	0	0	0	0	0	0	0	0	0	0	0	0	0	0	0	0	0	0	0	0	0	0	0	0	0	0	0	0	0	0	0	0	0	0	0	0	0
Bangladesh	0	0	0	0	0	0	0	0	0	0	0	0	0	0	0	0	0	0	0	0	0	0	0	0	0	0	0	0	0	0	0	0	0	0	0	0	0	0	0	0	0
Barbados	0	0	0	0	0	0	0	0	0	0	0	0	0	0	0	0	0	0	0	0	0	0	0	0	0	0	0	0	0	0	0	0	0	0	0	0	0	0	0	0	0
Belarus	0	0	0	0	0	0	0	0	0	0	0	0	0	0	0	0	0	0	0	0	0	0	0	0	0	0	0	0	0	0	0	0	0	0	0	0	0	0	0	0	0
Belgium	0	0	0	0	0	0	0	0	0	0	0	0	0	0	0	0	0	0	0	0	0	0	0	0	0	0	0	0	0	0	0	0	0	0	0	0	0	0	0	0	0
Belize	0	0	0	0	0	0	0	0	0	0	0	0	0	0	0	0	0	0	0	0	0	0	0	0	0	0	0	0	0	0	0	0	0	0	0	0	0	0	0	0	0
Benin	42526.1	44264.7	44004.6	43677.1	43181.3	42461.4	41186.1	39739.7	38166.6	36515.2	34803.1	33072	31228.3	29223.9	27013.3	24565.4	21799.4	18802.1	15554.5	12041.1	8250.59	7455.72	6598.61	5677.42	4689.97	3632.87	2499.13	1289.7	0	0	0	0	0	0	0	0	0	0	0	0	0
Bhutan	0	0	0	0	0	0	0	0	0	0	0	0	0	0	0	0	0	0	0	0	0	0	0	0	0	0	0	0	0	0	0	0	0	0	0	0	0	0	0	0	0
Bolivia	0	0	0	0	0	0	0	0	0	0	0	0	0	0	0	0	0	0	0	0	0	0	0	0	0	0	0	0	0	0	0	0	0	0	0	0	0	0	0	0	0
Bosnia and Herzegovina	0	0	0	0	0	0	0	0	0	0	0	0	0	0	0	0	0	0	0	0	0	0	0	0	0	0	0	0	0	0	0	0	0	0	0	0	0	0	0	0	0
Botswana	0	0	0	0	0	0	0	0	0	0	0	0	0	0	0	0	0	0	0	0	0	0	0	0	0	0	0	0	0	0	0	0	0	0	0	0	0	0	0	0	0
Brazil	0	0	0	0	0	0	0	0	0	0	0	0	0	0	0	0	0	0	0	0	0	0	0	0	0	0	0	0	0	0	0	0	0	0	0	0	0	0	0	0	0
Brunei	0	0	0	0	0	0	0	0	0	0	0	0	0	0	0	0	0	0	0	0	0	0	0	0	0	0	0	0	0	0	0	0	0	0	0	0	0	0	0	0	0
Bulgaria	0	0	0	0	0	0	0	0	0	0	0	0	0	0	0	0	0	0	0	0	0	0	0	0	0	0	0	0	0	0	0	0	0	0	0	0	0	0	0	0	0
Burkina Faso	42864.3	43932.1	40581.8	37073.2	33378.1	29467.5	25235.6	20776.8	16054.6	11035.6	5692.45	0	0	0	0	0	0	0	0	0	0	0	0	0	0	0	0	0	0	0	0	0	0	0	0	0	0	0	0	0	0
Burundi	24218.1	24500	24785.2	25083	25401.4	25754.1	26128.3	26529.2	26999	27588	28327.4	29521.2	30882.8	32375.4	33941.7	35534.8	34342.6	32944.7	31327.7	29485	27415.1	24698.3	21795.3	18695.4	15392.3	11881.4	8141.32	4186.5	0	0	0	0	0	0	0	0	0	0	0	0	0
Cambodia	0	0	0	0	0	0	0	0	0	0	0	0	0	0	0	0	0	0	0	0	0	0	0	0	0	0	0	0	0	0	0	0	0	0	0	0	0	0	0	0	0
Cameroon	170515	175268	180288	185583	191188	197120	202853	208950	215396	222149	220041	217131	213915	210375	206509	202287	197205	191832	186062	179790	172956	163143	152661	141461	129505	116745	102976	88345.5	72785.9	56231.1	38620	19870.8	0	0	0	0	0	0	0	0	0
Canada	0	0	0	0	0	0	0	0	0	0	0	0	0	0	0	0	0	0	0	0	0	0	0	0	0	0	0	0	0	0	0	0	0	0	0	0	0	0	0	0	0
Cape Verde	0	0	0	0	0	0	0	0	0	0	0	0	0	0	0	0	0	0	0	0	0	0	0	0	0	0	0	0	0	0	0	0	0	0	0	0	0	0	0	0	0
Central African Republic	56283.7	57477.4	58862	60393.1	62004.2	63648.5	65111.6	66586.8	68081.6	69615.9	68210.9	66341.1	64444.3	62507.6	60517	58471.2	56378.3	54242.3	52034.5	49727.5	47296.1	44436.6	41413.5	38220.3	34853	31299	27463.1	23452.9	19237	14790.7	10104.4	5170.99	0	0	0	0	0	0	0	0	0
Chad	32797.7	33669.7	34599.2	35593.8	36664.5	37818.4	38908.8	40107.2	41419.5	40969.5	40504.4	39903.7	39290.7	38614.2	37828.5	36909.7	35716.9	34395.2	32950.4	31387.5	29702.3	26831.9	23769.4	20488.5	16963.9	13173.3	9076.35	4693.85	0	0	0	0	0	0	0	0	0	0	0	0	0
Chile	0	0	0	0	0	0	0	0	0	0	0	0	0	0	0	0	0	0	0	0	0	0	0	0	0	0	0	0	0	0	0	0	0	0	0	0	0	0	0	0	0
China	0	0	0	0	0	0	0	0	0	0	0	0	0	0	0	0	0	0	0	0	0	0	0	0	0	0	0	0	0	0	0	0	0	0	0	0	0	0	0	0	0
Colombia	0	0	0	0	0	0	0	0	0	0	0	0	0	0	0	0	0	0	0	0	0	0	0	0	0	0	0	0	0	0	0	0	0	0	0	0	0	0	0	0	0
Comoros	0	0	0	0	0	0	0	0	0	0	0	0	0	0	0	0	0	0	0	0	0	0	0	0	0	0	0	0	0	0	0	0	0	0	0	0	0	0	0	0	0
Congo	7022.66	7231.86	7451.06	7681.04	7922.05	8173.81	8430.46	8697.68	8971.59	9247.95	9523.93	9756.4	9431.68	9087.98	8729.46	8357.7	7984.48	7590.97	7168.79	6710.52	6211.51	5573.56	4896.71	4181.72	3428.99	2637.46	1801.96	924.318	0	0	0	0	0	0	0	0	0	0	0	0	0
Costa Rica	0	0	0	0	0	0	0	0	0	0	0	0	0	0	0	0	0	0	0	0	0	0	0	0	0	0	0	0	0	0	0	0	0	0	0	0	0	0	0	0	0
Côte d’Ivoire	114613	118748	123126	127700	132387	137108	131791	125898	119376	112186	104331	95241	85716.9	75861.5	65758.6	55451.1	45050.9	34342	23296.1	11867.2	0	0	0	0	0	0	0	0	0	0	0	0	0	0	0	0	0	0	0	0	0
Croatia	0	0	0	0	0	0	0	0	0	0	0	0	0	0	0	0	0	0	0	0	0	0	0	0	0	0	0	0	0	0	0	0	0	0	0	0	0	0	0	0	0
Cuba	0	0	0	0	0	0	0	0	0	0	0	0	0	0	0	0	0	0	0	0	0	0	0	0	0	0	0	0	0	0	0	0	0	0	0	0	0	0	0	0	0
Cyprus	0	0	0	0	0	0	0	0	0	0	0	0	0	0	0	0	0	0	0	0	0	0	0	0	0	0	0	0	0	0	0	0	0	0	0	0	0	0	0	0	0
Czech Republic	0	0	0	0	0	0	0	0	0	0	0	0	0	0	0	0	0	0	0	0	0	0	0	0	0	0	0	0	0	0	0	0	0	0	0	0	0	0	0	0	0
Democratic Republic of the Congo	645999	668655	693753	719866	745525	770012	787695	804239	820963	839305	860169	882068	880804	880563	880641	880514	876696	873253	869706	865522	860380	841910	822176	800895	777861	752861	723600	692463	659122	623273	584656	541594	495858	447097	395000	339316	279216	215494	147878	76123.6	0
Denmark	0	0	0	0	0	0	0	0	0	0	0	0	0	0	0	0	0	0	0	0	0	0	0	0	0	0	0	0	0	0	0	0	0	0	0	0	0	0	0	0	0
Djibouti	0	0	0	0	0	0	0	0	0	0	0	0	0	0	0	0	0	0	0	0	0	0	0	0	0	0	0	0	0	0	0	0	0	0	0	0	0	0	0	0	0
Dominican Republic	0	0	0	0	0	0	0	0	0	0	0	0	0	0	0	0	0	0	0	0	0	0	0	0	0	0	0	0	0	0	0	0	0	0	0	0	0	0	0	0	0
Ecuador	0	0	0	0	0	0	0	0	0	0	0	0	0	0	0	0	0	0	0	0	0	0	0	0	0	0	0	0	0	0	0	0	0	0	0	0	0	0	0	0	0
Egypt	0	0	0	0	0	0	0	0	0	0	0	0	0	0	0	0	0	0	0	0	0	0	0	0	0	0	0	0	0	0	0	0	0	0	0	0	0	0	0	0	0
El Salvador	0	0	0	0	0	0	0	0	0	0	0	0	0	0	0	0	0	0	0	0	0	0	0	0	0	0	0	0	0	0	0	0	0	0	0	0	0	0	0	0	0
Equatorial Guinea	3526.21	3593.95	3671.44	3756.87	3848.76	3947.02	4053.12	4166.22	4290.05	4429.15	4443.49	4448.58	4461.65	4477.14	4487.64	4488.57	4461.65	4426.37	4382.86	4332.64	4275.91	4035.05	3780.41	3507.95	3214.06	2897.24	2553.02	2186.72	1797.96	1386.31	950.533	487.956	0	0	0	0	0	0	0	0	0
Eritrea	0	0	0	0	0	0	0	0	0	0	0	0	0	0	0	0	0	0	0	0	0	0	0	0	0	0	0	0	0	0	0	0	0	0	0	0	0	0	0	0	0
Estonia	0	0	0	0	0	0	0	0	0	0	0	0	0	0	0	0	0	0	0	0	0	0	0	0	0	0	0	0	0	0	0	0	0	0	0	0	0	0	0	0	0
Ethiopia	71537.5	73797.8	76230.4	78800	81463.1	84189.7	86715.9	89279.8	91901.2	94638.6	97541.3	100296	98261.9	96118.7	93778.2	91207.5	88404	85367.7	82106.5	78619.1	74870.5	71129.2	67045.1	62578.5	57686.3	52332.3	46428.4	40044.9	33147.6	25709.1	17712.4	9138.93	0	0	0	0	0	0	0	0	0
Federated States of Micronesia	0	0	0	0	0	0	0	0	0	0	0	0	0	0	0	0	0	0	0	0	0	0	0	0	0	0	0	0	0	0	0	0	0	0	0	0	0	0	0	0	0
Fiji	0	0	0	0	0	0	0	0	0	0	0	0	0	0	0	0	0	0	0	0	0	0	0	0	0	0	0	0	0	0	0	0	0	0	0	0	0	0	0	0	0
Finland	0	0	0	0	0	0	0	0	0	0	0	0	0	0	0	0	0	0	0	0	0	0	0	0	0	0	0	0	0	0	0	0	0	0	0	0	0	0	0	0	0
France	0	0	0	0	0	0	0	0	0	0	0	0	0	0	0	0	0	0	0	0	0	0	0	0	0	0	0	0	0	0	0	0	0	0	0	0	0	0	0	0	0
Gabon	0	0	0	0	0	0	0	0	0	0	0	0	0	0	0	0	0	0	0	0	0	0	0	0	0	0	0	0	0	0	0	0	0	0	0	0	0	0	0	0	0
Georgia	0	0	0	0	0	0	0	0	0	0	0	0	0	0	0	0	0	0	0	0	0	0	0	0	0	0	0	0	0	0	0	0	0	0	0	0	0	0	0	0	0
Germany	0	0	0	0	0	0	0	0	0	0	0	0	0	0	0	0	0	0	0	0	0	0	0	0	0	0	0	0	0	0	0	0	0	0	0	0	0	0	0	0	0
Ghana	80197.7	82618.6	80751.6	78695.6	76424.8	73925.5	71025.3	67921	64601	61045.5	57238.5	53138.4	48751.9	44088.5	39156.3	33944.8	28380.6	22527.9	16350.9	9819.19	2916.93	2745.77	2563.22	2368.56	2161.4	1941.43	1707.78	1460.36	1198.79	922.604	631.183	323.734	0	0	0	0	0	0	0	0	0
Greece	0	0	0	0	0	0	0	0	0	0	0	0	0	0	0	0	0	0	0	0	0	0	0	0	0	0	0	0	0	0	0	0	0	0	0	0	0	0	0	0	0
Grenada	0	0	0	0	0	0	0	0	0	0	0	0	0	0	0	0	0	0	0	0	0	0	0	0	0	0	0	0	0	0	0	0	0	0	0	0	0	0	0	0	0
Guatemala	0	0	0	0	0	0	0	0	0	0	0	0	0	0	0	0	0	0	0	0	0	0	0	0	0	0	0	0	0	0	0	0	0	0	0	0	0	0	0	0	0
Guinea	38418.4	40397.3	42739.9	45241.2	47664.4	49875.1	48355.5	46389.8	44123	41696.1	39184.8	36472.4	33675.3	30798.2	27838.4	24779.8	21598	18286.7	14796.7	11089	7141.3	6431.13	5675.81	4871.37	4014.41	3101.8	2128.23	1095.39	0	0	0	0	0	0	0	0	0	0	0	0	0
Guinea-Bissau	3982.6	4090.94	3769.37	3423.4	3063.72	2692.01	2292.23	1878.66	1446.11	989.948	508.214	0	0	0	0	0	0	0	0	0	0	0	0	0	0	0	0	0	0	0	0	0	0	0	0	0	0	0	0	0	0
Guyana	0	0	0	0	0	0	0	0	0	0	0	0	0	0	0	0	0	0	0	0	0	0	0	0	0	0	0	0	0	0	0	0	0	0	0	0	0	0	0	0	0
Haiti	0	0	0	0	0	0	0	0	0	0	0	0	0	0	0	0	0	0	0	0	0	0	0	0	0	0	0	0	0	0	0	0	0	0	0	0	0	0	0	0	0
Honduras	0	0	0	0	0	0	0	0	0	0	0	0	0	0	0	0	0	0	0	0	0	0	0	0	0	0	0	0	0	0	0	0	0	0	0	0	0	0	0	0	0
Hungary	0	0	0	0	0	0	0	0	0	0	0	0	0	0	0	0	0	0	0	0	0	0	0	0	0	0	0	0	0	0	0	0	0	0	0	0	0	0	0	0	0
Iceland	0	0	0	0	0	0	0	0	0	0	0	0	0	0	0	0	0	0	0	0	0	0	0	0	0	0	0	0	0	0	0	0	0	0	0	0	0	0	0	0	0
India	0	0	0	0	0	0	0	0	0	0	0	0	0	0	0	0	0	0	0	0	0	0	0	0	0	0	0	0	0	0	0	0	0	0	0	0	0	0	0	0	0
Indonesia	0	0	0	0	0	0	0	0	0	0	0	0	0	0	0	0	0	0	0	0	0	0	0	0	0	0	0	0	0	0	0	0	0	0	0	0	0	0	0	0	0
Iran	0	0	0	0	0	0	0	0	0	0	0	0	0	0	0	0	0	0	0	0	0	0	0	0	0	0	0	0	0	0	0	0	0	0	0	0	0	0	0	0	0
Iraq	0	0	0	0	0	0	0	0	0	0	0	0	0	0	0	0	0	0	0	0	0	0	0	0	0	0	0	0	0	0	0	0	0	0	0	0	0	0	0	0	0
Ireland	0	0	0	0	0	0	0	0	0	0	0	0	0	0	0	0	0	0	0	0	0	0	0	0	0	0	0	0	0	0	0	0	0	0	0	0	0	0	0	0	0
Israel	0	0	0	0	0	0	0	0	0	0	0	0	0	0	0	0	0	0	0	0	0	0	0	0	0	0	0	0	0	0	0	0	0	0	0	0	0	0	0	0	0
Italy	0	0	0	0	0	0	0	0	0	0	0	0	0	0	0	0	0	0	0	0	0	0	0	0	0	0	0	0	0	0	0	0	0	0	0	0	0	0	0	0	0
Jamaica	0	0	0	0	0	0	0	0	0	0	0	0	0	0	0	0	0	0	0	0	0	0	0	0	0	0	0	0	0	0	0	0	0	0	0	0	0	0	0	0	0
Japan	0	0	0	0	0	0	0	0	0	0	0	0	0	0	0	0	0	0	0	0	0	0	0	0	0	0	0	0	0	0	0	0	0	0	0	0	0	0	0	0	0
Jordan	0	0	0	0	0	0	0	0	0	0	0	0	0	0	0	0	0	0	0	0	0	0	0	0	0	0	0	0	0	0	0	0	0	0	0	0	0	0	0	0	0
Kazakhstan	0	0	0	0	0	0	0	0	0	0	0	0	0	0	0	0	0	0	0	0	0	0	0	0	0	0	0	0	0	0	0	0	0	0	0	0	0	0	0	0	0
Kenya	0	0	0	0	0	0	0	0	0	0	0	0	0	0	0	0	0	0	0	0	0	0	0	0	0	0	0	0	0	0	0	0	0	0	0	0	0	0	0	0	0
Kiribati	0	0	0	0	0	0	0	0	0	0	0	0	0	0	0	0	0	0	0	0	0	0	0	0	0	0	0	0	0	0	0	0	0	0	0	0	0	0	0	0	0
Kuwait	0	0	0	0	0	0	0	0	0	0	0	0	0	0	0	0	0	0	0	0	0	0	0	0	0	0	0	0	0	0	0	0	0	0	0	0	0	0	0	0	0
Kyrgyzstan	0	0	0	0	0	0	0	0	0	0	0	0	0	0	0	0	0	0	0	0	0	0	0	0	0	0	0	0	0	0	0	0	0	0	0	0	0	0	0	0	0
Laos	0	0	0	0	0	0	0	0	0	0	0	0	0	0	0	0	0	0	0	0	0	0	0	0	0	0	0	0	0	0	0	0	0	0	0	0	0	0	0	0	0
Latvia	0	0	0	0	0	0	0	0	0	0	0	0	0	0	0	0	0	0	0	0	0	0	0	0	0	0	0	0	0	0	0	0	0	0	0	0	0	0	0	0	0
Lebanon	0	0	0	0	0	0	0	0	0	0	0	0	0	0	0	0	0	0	0	0	0	0	0	0	0	0	0	0	0	0	0	0	0	0	0	0	0	0	0	0	0
Lesotho	0	0	0	0	0	0	0	0	0	0	0	0	0	0	0	0	0	0	0	0	0	0	0	0	0	0	0	0	0	0	0	0	0	0	0	0	0	0	0	0	0
Liberia	43986	43307.8	42715.3	42485.4	42945.5	44242.2	46927	50686.2	54971	59117.8	62723	64978.7	66552.3	67813.3	69235.1	71115.2	73611.3	70819.4	67823.1	64351.5	60289.7	55376.9	49932	44044	37777.8	31138	24066.9	16545.3	8534.48	0	0	0	0	0	0	0	0	0	0	0	0
Libya	0	0	0	0	0	0	0	0	0	0	0	0	0	0	0	0	0	0	0	0	0	0	0	0	0	0	0	0	0	0	0	0	0	0	0	0	0	0	0	0	0
Lithuania	0	0	0	0	0	0	0	0	0	0	0	0	0	0	0	0	0	0	0	0	0	0	0	0	0	0	0	0	0	0	0	0	0	0	0	0	0	0	0	0	0
Luxembourg	0	0	0	0	0	0	0	0	0	0	0	0	0	0	0	0	0	0	0	0	0	0	0	0	0	0	0	0	0	0	0	0	0	0	0	0	0	0	0	0	0
Macedonia	0	0	0	0	0	0	0	0	0	0	0	0	0	0	0	0	0	0	0	0	0	0	0	0	0	0	0	0	0	0	0	0	0	0	0	0	0	0	0	0	0
Madagascar	0	0	0	0	0	0	0	0	0	0	0	0	0	0	0	0	0	0	0	0	0	0	0	0	0	0	0	0	0	0	0	0	0	0	0	0	0	0	0	0	0
Malawi	19013.4	19539.9	19883.3	20132	20400.5	20762.4	21059	21504.1	21128.4	20743.8	20315.4	19825	19302.1	18756.8	18197.6	17622.7	17027	16387.6	15701	14966.9	14180.4	12795.9	11340.2	9783.08	8098.37	6277.8	4329.49	2234.78	0	0	0	0	0	0	0	0	0	0	0	0	0
Malaysia	0	0	0	0	0	0	0	0	0	0	0	0	0	0	0	0	0	0	0	0	0	0	0	0	0	0	0	0	0	0	0	0	0	0	0	0	0	0	0	0	0
Maldives	0	0	0	0	0	0	0	0	0	0	0	0	0	0	0	0	0	0	0	0	0	0	0	0	0	0	0	0	0	0	0	0	0	0	0	0	0	0	0	0	0
Mali	10843.7	11048.4	10179	9292.73	8364.68	7379.43	6307.7	5181.5	3994.49	2740.46	1411.85	0	0	0	0	0	0	0	0	0	0	0	0	0	0	0	0	0	0	0	0	0	0	0	0	0	0	0	0	0	0
Malta	0	0	0	0	0	0	0	0	0	0	0	0	0	0	0	0	0	0	0	0	0	0	0	0	0	0	0	0	0	0	0	0	0	0	0	0	0	0	0	0	0
Mauritania	0	0	0	0	0	0	0	0	0	0	0	0	0	0	0	0	0	0	0	0	0	0	0	0	0	0	0	0	0	0	0	0	0	0	0	0	0	0	0	0	0
Mauritius	0	0	0	0	0	0	0	0	0	0	0	0	0	0	0	0	0	0	0	0	0	0	0	0	0	0	0	0	0	0	0	0	0	0	0	0	0	0	0	0	0
Mexico	0	0	0	0	0	0	0	0	0	0	0	0	0	0	0	0	0	0	0	0	0	0	0	0	0	0	0	0	0	0	0	0	0	0	0	0	0	0	0	0	0
Moldova	0	0	0	0	0	0	0	0	0	0	0	0	0	0	0	0	0	0	0	0	0	0	0	0	0	0	0	0	0	0	0	0	0	0	0	0	0	0	0	0	0
Mongolia	0	0	0	0	0	0	0	0	0	0	0	0	0	0	0	0	0	0	0	0	0	0	0	0	0	0	0	0	0	0	0	0	0	0	0	0	0	0	0	0	0
Montenegro	0	0	0	0	0	0	0	0	0	0	0	0	0	0	0	0	0	0	0	0	0	0	0	0	0	0	0	0	0	0	0	0	0	0	0	0	0	0	0	0	0
Morocco	0	0	0	0	0	0	0	0	0	0	0	0	0	0	0	0	0	0	0	0	0	0	0	0	0	0	0	0	0	0	0	0	0	0	0	0	0	0	0	0	0
Mozambique	0	0	0	0	0	0	0	0	0	0	0	0	0	0	0	0	0	0	0	0	0	0	0	0	0	0	0	0	0	0	0	0	0	0	0	0	0	0	0	0	0
Myanmar	0	0	0	0	0	0	0	0	0	0	0	0	0	0	0	0	0	0	0	0	0	0	0	0	0	0	0	0	0	0	0	0	0	0	0	0	0	0	0	0	0
Namibia	0	0	0	0	0	0	0	0	0	0	0	0	0	0	0	0	0	0	0	0	0	0	0	0	0	0	0	0	0	0	0	0	0	0	0	0	0	0	0	0	0
Nepal	0	0	0	0	0	0	0	0	0	0	0	0	0	0	0	0	0	0	0	0	0	0	0	0	0	0	0	0	0	0	0	0	0	0	0	0	0	0	0	0	0
Netherlands	0	0	0	0	0	0	0	0	0	0	0	0	0	0	0	0	0	0	0	0	0	0	0	0	0	0	0	0	0	0	0	0	0	0	0	0	0	0	0	0	0
New Zealand	0	0	0	0	0	0	0	0	0	0	0	0	0	0	0	0	0	0	0	0	0	0	0	0	0	0	0	0	0	0	0	0	0	0	0	0	0	0	0	0	0
Nicaragua	0	0	0	0	0	0	0	0	0	0	0	0	0	0	0	0	0	0	0	0	0	0	0	0	0	0	0	0	0	0	0	0	0	0	0	0	0	0	0	0	0
Niger	1640.71	1693.42	1580.17	1460.65	1330.99	1188.86	1031.99	859.66	670.837	464.98	241.633	0	0	0	0	0	0	0	0	0	0	0	0	0	0	0	0	0	0	0	0	0	0	0	0	0	0	0	0	0	0
Nigeria	531633	545794	560773	576572	593192	610600	627056	644476	662720	652124	640346	625620	610018	593365	575525	556390	535161	512825	489172	464011	437196	398949	358454	315594	270262	222290	171299	117449	60433.7	0	0	0	0	0	0	0	0	0	0	0	0
North Korea	0	0	0	0	0	0	0	0	0	0	0	0	0	0	0	0	0	0	0	0	0	0	0	0	0	0	0	0	0	0	0	0	0	0	0	0	0	0	0	0	0
Norway	0	0	0	0	0	0	0	0	0	0	0	0	0	0	0	0	0	0	0	0	0	0	0	0	0	0	0	0	0	0	0	0	0	0	0	0	0	0	0	0	0
Oman	0	0	0	0	0	0	0	0	0	0	0	0	0	0	0	0	0	0	0	0	0	0	0	0	0	0	0	0	0	0	0	0	0	0	0	0	0	0	0	0	0
Pakistan	0	0	0	0	0	0	0	0	0	0	0	0	0	0	0	0	0	0	0	0	0	0	0	0	0	0	0	0	0	0	0	0	0	0	0	0	0	0	0	0	0
Palestine	0	0	0	0	0	0	0	0	0	0	0	0	0	0	0	0	0	0	0	0	0	0	0	0	0	0	0	0	0	0	0	0	0	0	0	0	0	0	0	0	0
Panama	0	0	0	0	0	0	0	0	0	0	0	0	0	0	0	0	0	0	0	0	0	0	0	0	0	0	0	0	0	0	0	0	0	0	0	0	0	0	0	0	0
Papua New Guinea	0	0	0	0	0	0	0	0	0	0	0	0	0	0	0	0	0	0	0	0	0	0	0	0	0	0	0	0	0	0	0	0	0	0	0	0	0	0	0	0	0
Paraguay	0	0	0	0	0	0	0	0	0	0	0	0	0	0	0	0	0	0	0	0	0	0	0	0	0	0	0	0	0	0	0	0	0	0	0	0	0	0	0	0	0
Peru	0	0	0	0	0	0	0	0	0	0	0	0	0	0	0	0	0	0	0	0	0	0	0	0	0	0	0	0	0	0	0	0	0	0	0	0	0	0	0	0	0
Philippines	0	0	0	0	0	0	0	0	0	0	0	0	0	0	0	0	0	0	0	0	0	0	0	0	0	0	0	0	0	0	0	0	0	0	0	0	0	0	0	0	0
Poland	0	0	0	0	0	0	0	0	0	0	0	0	0	0	0	0	0	0	0	0	0	0	0	0	0	0	0	0	0	0	0	0	0	0	0	0	0	0	0	0	0
Portugal	0	0	0	0	0	0	0	0	0	0	0	0	0	0	0	0	0	0	0	0	0	0	0	0	0	0	0	0	0	0	0	0	0	0	0	0	0	0	0	0	0
Qatar	0	0	0	0	0	0	0	0	0	0	0	0	0	0	0	0	0	0	0	0	0	0	0	0	0	0	0	0	0	0	0	0	0	0	0	0	0	0	0	0	0
Romania	0	0	0	0	0	0	0	0	0	0	0	0	0	0	0	0	0	0	0	0	0	0	0	0	0	0	0	0	0	0	0	0	0	0	0	0	0	0	0	0	0
Russia	0	0	0	0	0	0	0	0	0	0	0	0	0	0	0	0	0	0	0	0	0	0	0	0	0	0	0	0	0	0	0	0	0	0	0	0	0	0	0	0	0
Rwanda	0	0	0	0	0	0	0	0	0	0	0	0	0	0	0	0	0	0	0	0	0	0	0	0	0	0	0	0	0	0	0	0	0	0	0	0	0	0	0	0	0
Saint Lucia	0	0	0	0	0	0	0	0	0	0	0	0	0	0	0	0	0	0	0	0	0	0	0	0	0	0	0	0	0	0	0	0	0	0	0	0	0	0	0	0	0
Saint Vincent and the Grenadines	0	0	0	0	0	0	0	0	0	0	0	0	0	0	0	0	0	0	0	0	0	0	0	0	0	0	0	0	0	0	0	0	0	0	0	0	0	0	0	0	0
Samoa	0	0	0	0	0	0	0	0	0	0	0	0	0	0	0	0	0	0	0	0	0	0	0	0	0	0	0	0	0	0	0	0	0	0	0	0	0	0	0	0	0
São Tomé and Príncipe	0	0	0	0	0	0	0	0	0	0	0	0	0	0	0	0	0	0	0	0	0	0	0	0	0	0	0	0	0	0	0	0	0	0	0	0	0	0	0	0	0
Saudi Arabia	0	0	0	0	0	0	0	0	0	0	0	0	0	0	0	0	0	0	0	0	0	0	0	0	0	0	0	0	0	0	0	0	0	0	0	0	0	0	0	0	0
Senegal	486.517	501.743	466.446	428.516	387.286	342.497	292.464	239.583	184.017	125.761	64.5569	0	0	0	0	0	0	0	0	0	0	0	0	0	0	0	0	0	0	0	0	0	0	0	0	0	0	0	0	0	0
Serbia	0	0	0	0	0	0	0	0	0	0	0	0	0	0	0	0	0	0	0	0	0	0	0	0	0	0	0	0	0	0	0	0	0	0	0	0	0	0	0	0	0
Seychelles	0	0	0	0	0	0	0	0	0	0	0	0	0	0	0	0	0	0	0	0	0	0	0	0	0	0	0	0	0	0	0	0	0	0	0	0	0	0	0	0	0
Sierra Leone	40939.5	41027.5	40856.8	40564.4	40310.3	40197.3	40190.6	40380.5	40832.2	41619	42759.6	44360.5	46456.6	48821.2	51185.1	53387	48540.9	43110.6	37227.8	31002.7	24472.6	21912.4	19227.6	16413.1	13460.3	10356	7066.83	3620.87	0	0	0	0	0	0	0	0	0	0	0	0	0
Singapore	0	0	0	0	0	0	0	0	0	0	0	0	0	0	0	0	0	0	0	0	0	0	0	0	0	0	0	0	0	0	0	0	0	0	0	0	0	0	0	0	0
Slovakia	0	0	0	0	0	0	0	0	0	0	0	0	0	0	0	0	0	0	0	0	0	0	0	0	0	0	0	0	0	0	0	0	0	0	0	0	0	0	0	0	0
Slovenia	0	0	0	0	0	0	0	0	0	0	0	0	0	0	0	0	0	0	0	0	0	0	0	0	0	0	0	0	0	0	0	0	0	0	0	0	0	0	0	0	0
Solomon Islands	0	0	0	0	0	0	0	0	0	0	0	0	0	0	0	0	0	0	0	0	0	0	0	0	0	0	0	0	0	0	0	0	0	0	0	0	0	0	0	0	0
Somalia	0	0	0	0	0	0	0	0	0	0	0	0	0	0	0	0	0	0	0	0	0	0	0	0	0	0	0	0	0	0	0	0	0	0	0	0	0	0	0	0	0
South Africa	0	0	0	0	0	0	0	0	0	0	0	0	0	0	0	0	0	0	0	0	0	0	0	0	0	0	0	0	0	0	0	0	0	0	0	0	0	0	0	0	0
South Korea	0	0	0	0	0	0	0	0	0	0	0	0	0	0	0	0	0	0	0	0	0	0	0	0	0	0	0	0	0	0	0	0	0	0	0	0	0	0	0	0	0
Spain	0	0	0	0	0	0	0	0	0	0	0	0	0	0	0	0	0	0	0	0	0	0	0	0	0	0	0	0	0	0	0	0	0	0	0	0	0	0	0	0	0
Sri Lanka	0	0	0	0	0	0	0	0	0	0	0	0	0	0	0	0	0	0	0	0	0	0	0	0	0	0	0	0	0	0	0	0	0	0	0	0	0	0	0	0	0
Sudan	172959	178353	184248	190519	197017	203641	209663	215913	222401	229147	236186	243196	250552	258294	266504	275217	283888	293217	303067	276672	248071	223934	197946	170090	140337	108589	74595.2	38445.4	0	0	0	0	0	0	0	0	0	0	0	0	0
Suriname	0	0	0	0	0	0	0	0	0	0	0	0	0	0	0	0	0	0	0	0	0	0	0	0	0	0	0	0	0	0	0	0	0	0	0	0	0	0	0	0	0
Swaziland	0	0	0	0	0	0	0	0	0	0	0	0	0	0	0	0	0	0	0	0	0	0	0	0	0	0	0	0	0	0	0	0	0	0	0	0	0	0	0	0	0
Sweden	0	0	0	0	0	0	0	0	0	0	0	0	0	0	0	0	0	0	0	0	0	0	0	0	0	0	0	0	0	0	0	0	0	0	0	0	0	0	0	0	0
Switzerland	0	0	0	0	0	0	0	0	0	0	0	0	0	0	0	0	0	0	0	0	0	0	0	0	0	0	0	0	0	0	0	0	0	0	0	0	0	0	0	0	0
Syria	0	0	0	0	0	0	0	0	0	0	0	0	0	0	0	0	0	0	0	0	0	0	0	0	0	0	0	0	0	0	0	0	0	0	0	0	0	0	0	0	0
Tajikistan	0	0	0	0	0	0	0	0	0	0	0	0	0	0	0	0	0	0	0	0	0	0	0	0	0	0	0	0	0	0	0	0	0	0	0	0	0	0	0	0	0
Tanzania	54503.8	56359.9	58401.6	60564.7	62767.7	64964.5	66886.6	68793.2	70720.5	69736	68675.5	67397.6	66034.9	64579.2	63019.8	61343.1	59487	57516.1	55406.7	53141.7	50707.2	46450.8	41930.4	37100.2	31920.7	26366.7	20415.3	14048.9	7251.9	0	0	0	0	0	0	0	0	0	0	0	0
Thailand	0	0	0	0	0	0	0	0	0	0	0	0	0	0	0	0	0	0	0	0	0	0	0	0	0	0	0	0	0	0	0	0	0	0	0	0	0	0	0	0	0
The Bahamas	0	0	0	0	0	0	0	0	0	0	0	0	0	0	0	0	0	0	0	0	0	0	0	0	0	0	0	0	0	0	0	0	0	0	0	0	0	0	0	0	0
The Gambia	0	0	0	0	0	0	0	0	0	0	0	0	0	0	0	0	0	0	0	0	0	0	0	0	0	0	0	0	0	0	0	0	0	0	0	0	0	0	0	0	0
Timor-Leste	0	0	0	0	0	0	0	0	0	0	0	0	0	0	0	0	0	0	0	0	0	0	0	0	0	0	0	0	0	0	0	0	0	0	0	0	0	0	0	0	0
Togo	9481.83	9689.14	9406.37	9109.98	8805.97	8497.34	8200.47	7892	7566.48	7217.72	6840.41	6428.9	5985.39	5506.46	4989.01	4430.52	3823.4	3175.42	2483.74	1745.93	960.244	865.178	763.46	654.915	539.404	416.603	285.795	147.149	0	0	0	0	0	0	0	0	0	0	0	0	0
Tonga	0	0	0	0	0	0	0	0	0	0	0	0	0	0	0	0	0	0	0	0	0	0	0	0	0	0	0	0	0	0	0	0	0	0	0	0	0	0	0	0	0
Trinidad and Tobago	0	0	0	0	0	0	0	0	0	0	0	0	0	0	0	0	0	0	0	0	0	0	0	0	0	0	0	0	0	0	0	0	0	0	0	0	0	0	0	0	0
Tunisia	0	0	0	0	0	0	0	0	0	0	0	0	0	0	0	0	0	0	0	0	0	0	0	0	0	0	0	0	0	0	0	0	0	0	0	0	0	0	0	0	0
Turkey	0	0	0	0	0	0	0	0	0	0	0	0	0	0	0	0	0	0	0	0	0	0	0	0	0	0	0	0	0	0	0	0	0	0	0	0	0	0	0	0	0
Turkmenistan	0	0	0	0	0	0	0	0	0	0	0	0	0	0	0	0	0	0	0	0	0	0	0	0	0	0	0	0	0	0	0	0	0	0	0	0	0	0	0	0	0
Uganda	40746.1	41982.2	43267	44602.1	45994.4	47451.6	48781.4	50204.1	51725.2	53347.1	52329.8	51202.7	49994.2	48687.5	47271	45728.5	43977.3	42087.8	40031	37777.8	35308.1	32546.8	29544	26279.2	22733.2	18884.7	14692.8	10164.9	5275.55	0	0	0	0	0	0	0	0	0	0	0	0
Ukraine	0	0	0	0	0	0	0	0	0	0	0	0	0	0	0	0	0	0	0	0	0	0	0	0	0	0	0	0	0	0	0	0	0	0	0	0	0	0	0	0	0
United Arab Emirates	0	0	0	0	0	0	0	0	0	0	0	0	0	0	0	0	0	0	0	0	0	0	0	0	0	0	0	0	0	0	0	0	0	0	0	0	0	0	0	0	0
United Kingdom	0	0	0	0	0	0	0	0	0	0	0	0	0	0	0	0	0	0	0	0	0	0	0	0	0	0	0	0	0	0	0	0	0	0	0	0	0	0	0	0	0
United States	0	0	0	0	0	0	0	0	0	0	0	0	0	0	0	0	0	0	0	0	0	0	0	0	0	0	0	0	0	0	0	0	0	0	0	0	0	0	0	0	0
Uruguay	0	0	0	0	0	0	0	0	0	0	0	0	0	0	0	0	0	0	0	0	0	0	0	0	0	0	0	0	0	0	0	0	0	0	0	0	0	0	0	0	0
Uzbekistan	0	0	0	0	0	0	0	0	0	0	0	0	0	0	0	0	0	0	0	0	0	0	0	0	0	0	0	0	0	0	0	0	0	0	0	0	0	0	0	0	0
Vanuatu	0	0	0	0	0	0	0	0	0	0	0	0	0	0	0	0	0	0	0	0	0	0	0	0	0	0	0	0	0	0	0	0	0	0	0	0	0	0	0	0	0
Venezuela	0	0	0	0	0	0	0	0	0	0	0	0	0	0	0	0	0	0	0	0	0	0	0	0	0	0	0	0	0	0	0	0	0	0	0	0	0	0	0	0	0
Vietnam	0	0	0	0	0	0	0	0	0	0	0	0	0	0	0	0	0	0	0	0	0	0	0	0	0	0	0	0	0	0	0	0	0	0	0	0	0	0	0	0	0
Yemen	0	0	0	0	0	0	0	0	0	0	0	0	0	0	0	0	0	0	0	0	0	0	0	0	0	0	0	0	0	0	0	0	0	0	0	0	0	0	0	0	0
Zambia	0	0	0	0	0	0	0	0	0	0	0	0	0	0	0	0	0	0	0	0	0	0	0	0	0	0	0	0	0	0	0	0	0	0	0	0	0	0	0	0	0
Zimbabwe	0	0	0	0	0	0	0	0	0	0	0	0	0	0	0	0	0	0	0	0	0	0	0	0	0	0	0	0	0	0	0	0	0	0	0	0	0	0	0	0	0
WOMEN
Afghanistan	0	0	0	0	0	0	0	0	0	0	0	0	0	0	0	0	0	0	0	0	0	0	0	0	0	0	0	0	0	0	0	0	0	0	0	0	0	0	0	0	0
Albania	0	0	0	0	0	0	0	0	0	0	0	0	0	0	0	0	0	0	0	0	0	0	0	0	0	0	0	0	0	0	0	0	0	0	0	0	0	0	0	0	0
Algeria	0	0	0	0	0	0	0	0	0	0	0	0	0	0	0	0	0	0	0	0	0	0	0	0	0	0	0	0	0	0	0	0	0	0	0	0	0	0	0	0	0
Angola	8428.27	8655.91	8923.31	9217.2	9521.04	9825.78	10081.1	10341.8	10618.6	10924	11264.3	11607.9	11994.8	12415.8	12859.9	13320.4	13135.3	12933.5	12710.9	12465.9	12196.9	11189.5	10119	8973.24	7740.55	6412.21	4976.11	3432.69	1776.47	0	0	0	0	0	0	0	0	0	0	0	0
Antigua and Barbuda	0	0	0	0	0	0	0	0	0	0	0	0	0	0	0	0	0	0	0	0	0	0	0	0	0	0	0	0	0	0	0	0	0	0	0	0	0	0	0	0	0
Argentina	0	0	0	0	0	0	0	0	0	0	0	0	0	0	0	0	0	0	0	0	0	0	0	0	0	0	0	0	0	0	0	0	0	0	0	0	0	0	0	0	0
Armenia	0	0	0	0	0	0	0	0	0	0	0	0	0	0	0	0	0	0	0	0	0	0	0	0	0	0	0	0	0	0	0	0	0	0	0	0	0	0	0	0	0
Australia	0	0	0	0	0	0	0	0	0	0	0	0	0	0	0	0	0	0	0	0	0	0	0	0	0	0	0	0	0	0	0	0	0	0	0	0	0	0	0	0	0
Austria	0	0	0	0	0	0	0	0	0	0	0	0	0	0	0	0	0	0	0	0	0	0	0	0	0	0	0	0	0	0	0	0	0	0	0	0	0	0	0	0	0
Azerbaijan	0	0	0	0	0	0	0	0	0	0	0	0	0	0	0	0	0	0	0	0	0	0	0	0	0	0	0	0	0	0	0	0	0	0	0	0	0	0	0	0	0
Bahrain	0	0	0	0	0	0	0	0	0	0	0	0	0	0	0	0	0	0	0	0	0	0	0	0	0	0	0	0	0	0	0	0	0	0	0	0	0	0	0	0	0
Bangladesh	0	0	0	0	0	0	0	0	0	0	0	0	0	0	0	0	0	0	0	0	0	0	0	0	0	0	0	0	0	0	0	0	0	0	0	0	0	0	0	0	0
Barbados	0	0	0	0	0	0	0	0	0	0	0	0	0	0	0	0	0	0	0	0	0	0	0	0	0	0	0	0	0	0	0	0	0	0	0	0	0	0	0	0	0
Belarus	0	0	0	0	0	0	0	0	0	0	0	0	0	0	0	0	0	0	0	0	0	0	0	0	0	0	0	0	0	0	0	0	0	0	0	0	0	0	0	0	0
Belgium	0	0	0	0	0	0	0	0	0	0	0	0	0	0	0	0	0	0	0	0	0	0	0	0	0	0	0	0	0	0	0	0	0	0	0	0	0	0	0	0	0
Belize	0	0	0	0	0	0	0	0	0	0	0	0	0	0	0	0	0	0	0	0	0	0	0	0	0	0	0	0	0	0	0	0	0	0	0	0	0	0	0	0	0
Benin	39815.4	41142.2	40565.3	39922.7	39165.7	38267.7	37072.5	35760.7	34345.6	32841.6	31252.7	29587.6	27810.9	25900.5	23836.4	21601.9	19155.7	16532.8	13716.9	10693.7	7453.18	6726.66	5946.22	5109.99	4215.98	3261.37	2241.28	1155.35	0	0	0	0	0	0	0	0	0	0	0	0	0
Bhutan	0	0	0	0	0	0	0	0	0	0	0	0	0	0	0	0	0	0	0	0	0	0	0	0	0	0	0	0	0	0	0	0	0	0	0	0	0	0	0	0	0
Bolivia	0	0	0	0	0	0	0	0	0	0	0	0	0	0	0	0	0	0	0	0	0	0	0	0	0	0	0	0	0	0	0	0	0	0	0	0	0	0	0	0	0
Bosnia and Herzegovina	0	0	0	0	0	0	0	0	0	0	0	0	0	0	0	0	0	0	0	0	0	0	0	0	0	0	0	0	0	0	0	0	0	0	0	0	0	0	0	0	0
Botswana	0	0	0	0	0	0	0	0	0	0	0	0	0	0	0	0	0	0	0	0	0	0	0	0	0	0	0	0	0	0	0	0	0	0	0	0	0	0	0	0	0
Brazil	0	0	0	0	0	0	0	0	0	0	0	0	0	0	0	0	0	0	0	0	0	0	0	0	0	0	0	0	0	0	0	0	0	0	0	0	0	0	0	0	0
Brunei	0	0	0	0	0	0	0	0	0	0	0	0	0	0	0	0	0	0	0	0	0	0	0	0	0	0	0	0	0	0	0	0	0	0	0	0	0	0	0	0	0
Bulgaria	0	0	0	0	0	0	0	0	0	0	0	0	0	0	0	0	0	0	0	0	0	0	0	0	0	0	0	0	0	0	0	0	0	0	0	0	0	0	0	0	0
Burkina Faso	47583.5	48725.9	44957.8	41013.6	36868.7	32495.8	27777.1	22825.2	17601.3	12072.1	6212.24	0	0	0	0	0	0	0	0	0	0	0	0	0	0	0	0	0	0	0	0	0	0	0	0	0	0	0	0	0	0
Burundi	21817.3	22130.6	22476.8	22842.8	23206.8	23560.3	23751.9	23930.4	24145.3	24460.7	24919.1	25815.3	26874.2	28066.2	29341.2	30655.5	29605.7	28401.4	27017.8	25441.1	23669.1	21380.7	18909.4	16251.1	13403.9	10364.6	7116.34	3666.15	0	0	0	0	0	0	0	0	0	0	0	0	0
Cambodia	0	0	0	0	0	0	0	0	0	0	0	0	0	0	0	0	0	0	0	0	0	0	0	0	0	0	0	0	0	0	0	0	0	0	0	0	0	0	0	0	0
Cameroon	151792	155916	160267	164846	169675	174767	179690	184901	190388	196121	193961	191087	187939	184503	180776	176738	171979	166965	161608	155823	149560	140943	131771	121998	111590	100506	88593.7	75953.9	62533.5	48279.8	33140.2	17043.6	0	0	0	0	0	0	0	0	0
Canada	0	0	0	0	0	0	0	0	0	0	0	0	0	0	0	0	0	0	0	0	0	0	0	0	0	0	0	0	0	0	0	0	0	0	0	0	0	0	0	0	0
Cape Verde	0	0	0	0	0	0	0	0	0	0	0	0	0	0	0	0	0	0	0	0	0	0	0	0	0	0	0	0	0	0	0	0	0	0	0	0	0	0	0	0	0
Central African Republic	50839.7	51961.3	53237.9	54631.7	56086	57560.5	58879.5	60195.9	61516.8	62860.7	61510	59761.9	57977	56148	54266.8	52335.2	50369.6	48361.5	46287.5	44125.3	41854.7	39290.9	36585	33732.3	30730.1	27568.3	24176.7	20633.1	16912	12993.5	8870.38	4538.12	0	0	0	0	0	0	0	0	0
Chad	27663.7	28364.2	29111.7	29911.2	30770.2	31693.7	32563.8	33519.7	34564.4	34138.9	33699.2	33151.1	32591.9	31980.9	31282.4	30478	29458.4	28335.8	27115.9	25803.9	24397.1	22014.8	19481.9	16775.9	13875.7	10764	7409.92	3828.73	0	0	0	0	0	0	0	0	0	0	0	0	0
Chile	0	0	0	0	0	0	0	0	0	0	0	0	0	0	0	0	0	0	0	0	0	0	0	0	0	0	0	0	0	0	0	0	0	0	0	0	0	0	0	0	0
China	0	0	0	0	0	0	0	0	0	0	0	0	0	0	0	0	0	0	0	0	0	0	0	0	0	0	0	0	0	0	0	0	0	0	0	0	0	0	0	0	0
Colombia	0	0	0	0	0	0	0	0	0	0	0	0	0	0	0	0	0	0	0	0	0	0	0	0	0	0	0	0	0	0	0	0	0	0	0	0	0	0	0	0	0
Comoros	0	0	0	0	0	0	0	0	0	0	0	0	0	0	0	0	0	0	0	0	0	0	0	0	0	0	0	0	0	0	0	0	0	0	0	0	0	0	0	0	0
Congo	5562.13	5724.6	5894.59	6072.45	6258.07	6451.16	6647.14	6850.44	7058.08	7267.03	7475.2	7651.54	7389.72	7113.27	6825.79	6528.71	6231.39	5918.9	5584.52	5222.37	4828.83	4332.44	3805.89	3249.78	2664.47	2049.14	1400.04	718.138	0	0	0	0	0	0	0	0	0	0	0	0	0
Costa Rica	0	0	0	0	0	0	0	0	0	0	0	0	0	0	0	0	0	0	0	0	0	0	0	0	0	0	0	0	0	0	0	0	0	0	0	0	0	0	0	0	0
Côte d’Ivoire	87909.3	91388.4	95056.4	98875.9	102784	106727	102905	98589.1	93750	88372.4	82457.4	75617.3	68394.3	60843.9	53009.1	44914.5	36655.9	28059.4	19109.3	9771.59	0	0	0	0	0	0	0	0	0	0	0	0	0	0	0	0	0	0	0	0	0
Croatia	0	0	0	0	0	0	0	0	0	0	0	0	0	0	0	0	0	0	0	0	0	0	0	0	0	0	0	0	0	0	0	0	0	0	0	0	0	0	0	0	0
Cuba	0	0	0	0	0	0	0	0	0	0	0	0	0	0	0	0	0	0	0	0	0	0	0	0	0	0	0	0	0	0	0	0	0	0	0	0	0	0	0	0	0
Cyprus	0	0	0	0	0	0	0	0	0	0	0	0	0	0	0	0	0	0	0	0	0	0	0	0	0	0	0	0	0	0	0	0	0	0	0	0	0	0	0	0	0
Czech Republic	0	0	0	0	0	0	0	0	0	0	0	0	0	0	0	0	0	0	0	0	0	0	0	0	0	0	0	0	0	0	0	0	0	0	0	0	0	0	0	0	0
Democratic Republic of the Congo	581248	600496	621877	644107	665853	686457	701244	714915	728643	743735	761023	779371	776771	775085	773665	772037	767509	763221	758770	753745	747886	731473	714028	695267	674970	652947	627497	600362	571291	540066	506479	469227	429644	387424	342293	294040	242036	186846	128244	66026.5	0
Denmark	0	0	0	0	0	0	0	0	0	0	0	0	0	0	0	0	0	0	0	0	0	0	0	0	0	0	0	0	0	0	0	0	0	0	0	0	0	0	0	0	0
Djibouti	0	0	0	0	0	0	0	0	0	0	0	0	0	0	0	0	0	0	0	0	0	0	0	0	0	0	0	0	0	0	0	0	0	0	0	0	0	0	0	0	0
Dominican Republic	0	0	0	0	0	0	0	0	0	0	0	0	0	0	0	0	0	0	0	0	0	0	0	0	0	0	0	0	0	0	0	0	0	0	0	0	0	0	0	0	0
Ecuador	0	0	0	0	0	0	0	0	0	0	0	0	0	0	0	0	0	0	0	0	0	0	0	0	0	0	0	0	0	0	0	0	0	0	0	0	0	0	0	0	0
Egypt	0	0	0	0	0	0	0	0	0	0	0	0	0	0	0	0	0	0	0	0	0	0	0	0	0	0	0	0	0	0	0	0	0	0	0	0	0	0	0	0	0
El Salvador	0	0	0	0	0	0	0	0	0	0	0	0	0	0	0	0	0	0	0	0	0	0	0	0	0	0	0	0	0	0	0	0	0	0	0	0	0	0	0	0	0
Equatorial Guinea	2879.55	2930.72	2988.21	3050.93	3118.56	3191.75	3272.21	3358	3452.18	3558.62	3564.32	3563.57	3569.37	3577.65	3582.75	3581.19	3561.23	3535.13	3502.63	3464.48	3420.66	3232.27	3032.01	2816.81	2583.97	2332.23	2058.04	1765.41	1453.78	1122.61	770.844	396.397	0	0	0	0	0	0	0	0	0
Eritrea	0	0	0	0	0	0	0	0	0	0	0	0	0	0	0	0	0	0	0	0	0	0	0	0	0	0	0	0	0	0	0	0	0	0	0	0	0	0	0	0	0
Estonia	0	0	0	0	0	0	0	0	0	0	0	0	0	0	0	0	0	0	0	0	0	0	0	0	0	0	0	0	0	0	0	0	0	0	0	0	0	0	0	0	0
Ethiopia	58621.2	60486.7	62536.4	64725.3	66987.9	69279.4	71264.3	73282.7	75355.6	77531.9	79847.4	82104.5	80378	78547.5	76553	74372.3	72041.4	69508.7	66773	63831.8	60663.6	57606.1	54271.8	50630.4	46648.5	42297.5	37513.4	32345.2	26765.4	20752.1	14292.3	7373.34	0	0	0	0	0	0	0	0	0
Federated States of Micronesia	0	0	0	0	0	0	0	0	0	0	0	0	0	0	0	0	0	0	0	0	0	0	0	0	0	0	0	0	0	0	0	0	0	0	0	0	0	0	0	0	0
Fiji	0	0	0	0	0	0	0	0	0	0	0	0	0	0	0	0	0	0	0	0	0	0	0	0	0	0	0	0	0	0	0	0	0	0	0	0	0	0	0	0	0
Finland	0	0	0	0	0	0	0	0	0	0	0	0	0	0	0	0	0	0	0	0	0	0	0	0	0	0	0	0	0	0	0	0	0	0	0	0	0	0	0	0	0
France	0	0	0	0	0	0	0	0	0	0	0	0	0	0	0	0	0	0	0	0	0	0	0	0	0	0	0	0	0	0	0	0	0	0	0	0	0	0	0	0	0
Gabon	0	0	0	0	0	0	0	0	0	0	0	0	0	0	0	0	0	0	0	0	0	0	0	0	0	0	0	0	0	0	0	0	0	0	0	0	0	0	0	0	0
Georgia	0	0	0	0	0	0	0	0	0	0	0	0	0	0	0	0	0	0	0	0	0	0	0	0	0	0	0	0	0	0	0	0	0	0	0	0	0	0	0	0	0
Germany	0	0	0	0	0	0	0	0	0	0	0	0	0	0	0	0	0	0	0	0	0	0	0	0	0	0	0	0	0	0	0	0	0	0	0	0	0	0	0	0	0
Ghana	64957.6	67147	65888.2	64465.7	62817.5	60912.6	58594.5	56057	53329.8	50438.2	47386.2	44259	40899.9	37282.9	33383	29169.3	24573.9	19639	14322.7	8598.31	2465.72	2317.5	2157.38	1986.52	1806.34	1617.43	1419.13	1210.92	992.229	762.389	520.765	266.694	0	0	0	0	0	0	0	0	0
Greece	0	0	0	0	0	0	0	0	0	0	0	0	0	0	0	0	0	0	0	0	0	0	0	0	0	0	0	0	0	0	0	0	0	0	0	0	0	0	0	0	0
Grenada	0	0	0	0	0	0	0	0	0	0	0	0	0	0	0	0	0	0	0	0	0	0	0	0	0	0	0	0	0	0	0	0	0	0	0	0	0	0	0	0	0
Guatemala	0	0	0	0	0	0	0	0	0	0	0	0	0	0	0	0	0	0	0	0	0	0	0	0	0	0	0	0	0	0	0	0	0	0	0	0	0	0	0	0	0
Guinea	31748	33352	35247.5	37264.7	39207.2	40962.8	39661.6	37990.9	36072.6	34025.8	31915.8	29660.6	27344.3	24973.9	22550	20061.1	17502.7	14851.2	12064.6	9109.94	5969.07	5371.74	4737.12	4062.24	3344.67	2582.03	1770.38	910.599	0	0	0	0	0	0	0	0	0	0	0	0	0
Guinea-Bissau	3152.29	3240.1	2986.89	2713.63	2428.78	2133.78	1817.12	1488.95	1145.47	783.399	401.648	0	0	0	0	0	0	0	0	0	0	0	0	0	0	0	0	0	0	0	0	0	0	0	0	0	0	0	0	0	0
Guyana	0	0	0	0	0	0	0	0	0	0	0	0	0	0	0	0	0	0	0	0	0	0	0	0	0	0	0	0	0	0	0	0	0	0	0	0	0	0	0	0	0
Haiti	0	0	0	0	0	0	0	0	0	0	0	0	0	0	0	0	0	0	0	0	0	0	0	0	0	0	0	0	0	0	0	0	0	0	0	0	0	0	0	0	0
Honduras	0	0	0	0	0	0	0	0	0	0	0	0	0	0	0	0	0	0	0	0	0	0	0	0	0	0	0	0	0	0	0	0	0	0	0	0	0	0	0	0	0
Hungary	0	0	0	0	0	0	0	0	0	0	0	0	0	0	0	0	0	0	0	0	0	0	0	0	0	0	0	0	0	0	0	0	0	0	0	0	0	0	0	0	0
Iceland	0	0	0	0	0	0	0	0	0	0	0	0	0	0	0	0	0	0	0	0	0	0	0	0	0	0	0	0	0	0	0	0	0	0	0	0	0	0	0	0	0
India	0	0	0	0	0	0	0	0	0	0	0	0	0	0	0	0	0	0	0	0	0	0	0	0	0	0	0	0	0	0	0	0	0	0	0	0	0	0	0	0	0
Indonesia	0	0	0	0	0	0	0	0	0	0	0	0	0	0	0	0	0	0	0	0	0	0	0	0	0	0	0	0	0	0	0	0	0	0	0	0	0	0	0	0	0
Iran	0	0	0	0	0	0	0	0	0	0	0	0	0	0	0	0	0	0	0	0	0	0	0	0	0	0	0	0	0	0	0	0	0	0	0	0	0	0	0	0	0
Iraq	0	0	0	0	0	0	0	0	0	0	0	0	0	0	0	0	0	0	0	0	0	0	0	0	0	0	0	0	0	0	0	0	0	0	0	0	0	0	0	0	0
Ireland	0	0	0	0	0	0	0	0	0	0	0	0	0	0	0	0	0	0	0	0	0	0	0	0	0	0	0	0	0	0	0	0	0	0	0	0	0	0	0	0	0
Israel	0	0	0	0	0	0	0	0	0	0	0	0	0	0	0	0	0	0	0	0	0	0	0	0	0	0	0	0	0	0	0	0	0	0	0	0	0	0	0	0	0
Italy	0	0	0	0	0	0	0	0	0	0	0	0	0	0	0	0	0	0	0	0	0	0	0	0	0	0	0	0	0	0	0	0	0	0	0	0	0	0	0	0	0
Jamaica	0	0	0	0	0	0	0	0	0	0	0	0	0	0	0	0	0	0	0	0	0	0	0	0	0	0	0	0	0	0	0	0	0	0	0	0	0	0	0	0	0
Japan	0	0	0	0	0	0	0	0	0	0	0	0	0	0	0	0	0	0	0	0	0	0	0	0	0	0	0	0	0	0	0	0	0	0	0	0	0	0	0	0	0
Jordan	0	0	0	0	0	0	0	0	0	0	0	0	0	0	0	0	0	0	0	0	0	0	0	0	0	0	0	0	0	0	0	0	0	0	0	0	0	0	0	0	0
Kazakhstan	0	0	0	0	0	0	0	0	0	0	0	0	0	0	0	0	0	0	0	0	0	0	0	0	0	0	0	0	0	0	0	0	0	0	0	0	0	0	0	0	0
Kenya	0	0	0	0	0	0	0	0	0	0	0	0	0	0	0	0	0	0	0	0	0	0	0	0	0	0	0	0	0	0	0	0	0	0	0	0	0	0	0	0	0
Kiribati	0	0	0	0	0	0	0	0	0	0	0	0	0	0	0	0	0	0	0	0	0	0	0	0	0	0	0	0	0	0	0	0	0	0	0	0	0	0	0	0	0
Kuwait	0	0	0	0	0	0	0	0	0	0	0	0	0	0	0	0	0	0	0	0	0	0	0	0	0	0	0	0	0	0	0	0	0	0	0	0	0	0	0	0	0
Kyrgyzstan	0	0	0	0	0	0	0	0	0	0	0	0	0	0	0	0	0	0	0	0	0	0	0	0	0	0	0	0	0	0	0	0	0	0	0	0	0	0	0	0	0
Laos	0	0	0	0	0	0	0	0	0	0	0	0	0	0	0	0	0	0	0	0	0	0	0	0	0	0	0	0	0	0	0	0	0	0	0	0	0	0	0	0	0
Latvia	0	0	0	0	0	0	0	0	0	0	0	0	0	0	0	0	0	0	0	0	0	0	0	0	0	0	0	0	0	0	0	0	0	0	0	0	0	0	0	0	0
Lebanon	0	0	0	0	0	0	0	0	0	0	0	0	0	0	0	0	0	0	0	0	0	0	0	0	0	0	0	0	0	0	0	0	0	0	0	0	0	0	0	0	0
Lesotho	0	0	0	0	0	0	0	0	0	0	0	0	0	0	0	0	0	0	0	0	0	0	0	0	0	0	0	0	0	0	0	0	0	0	0	0	0	0	0	0	0
Liberia	35463.9	34954.3	34507.6	34342	34715.8	35745.8	37851.7	40796.8	44147.6	47378.9	50171.1	51914.6	53108.7	54045.7	55101.6	56514	58434.4	56336.2	54093.8	51494.8	48448.1	44453.1	40036.7	35272.8	30215.6	24871.5	19202.3	13186.2	6793.91	0	0	0	0	0	0	0	0	0	0	0	0
Libya	0	0	0	0	0	0	0	0	0	0	0	0	0	0	0	0	0	0	0	0	0	0	0	0	0	0	0	0	0	0	0	0	0	0	0	0	0	0	0	0	0
Lithuania	0	0	0	0	0	0	0	0	0	0	0	0	0	0	0	0	0	0	0	0	0	0	0	0	0	0	0	0	0	0	0	0	0	0	0	0	0	0	0	0	0
Luxembourg	0	0	0	0	0	0	0	0	0	0	0	0	0	0	0	0	0	0	0	0	0	0	0	0	0	0	0	0	0	0	0	0	0	0	0	0	0	0	0	0	0
Macedonia	0	0	0	0	0	0	0	0	0	0	0	0	0	0	0	0	0	0	0	0	0	0	0	0	0	0	0	0	0	0	0	0	0	0	0	0	0	0	0	0	0
Madagascar	0	0	0	0	0	0	0	0	0	0	0	0	0	0	0	0	0	0	0	0	0	0	0	0	0	0	0	0	0	0	0	0	0	0	0	0	0	0	0	0	0
Malawi	16009.5	16356.2	16551	16668.4	16805.1	17022.9	17236.9	17569.1	17230.2	16884.8	16504.1	16074.1	15618.3	15145.1	14661.8	14167.3	13658.6	13117.2	12540.9	11929.4	11279.1	10157.3	8982.89	7733.15	6388.46	4942.69	3401.93	1752.7	0	0	0	0	0	0	0	0	0	0	0	0	0
Malaysia	0	0	0	0	0	0	0	0	0	0	0	0	0	0	0	0	0	0	0	0	0	0	0	0	0	0	0	0	0	0	0	0	0	0	0	0	0	0	0	0	0
Maldives	0	0	0	0	0	0	0	0	0	0	0	0	0	0	0	0	0	0	0	0	0	0	0	0	0	0	0	0	0	0	0	0	0	0	0	0	0	0	0	0	0
Mali	11479.6	11684.7	10741.3	9775.85	8769.02	7708.72	6566.75	5375.28	4128.88	2822.12	1448.33	0	0	0	0	0	0	0	0	0	0	0	0	0	0	0	0	0	0	0	0	0	0	0	0	0	0	0	0	0	0
Malta	0	0	0	0	0	0	0	0	0	0	0	0	0	0	0	0	0	0	0	0	0	0	0	0	0	0	0	0	0	0	0	0	0	0	0	0	0	0	0	0	0
Mauritania	0	0	0	0	0	0	0	0	0	0	0	0	0	0	0	0	0	0	0	0	0	0	0	0	0	0	0	0	0	0	0	0	0	0	0	0	0	0	0	0	0
Mauritius	0	0	0	0	0	0	0	0	0	0	0	0	0	0	0	0	0	0	0	0	0	0	0	0	0	0	0	0	0	0	0	0	0	0	0	0	0	0	0	0	0
Mexico	0	0	0	0	0	0	0	0	0	0	0	0	0	0	0	0	0	0	0	0	0	0	0	0	0	0	0	0	0	0	0	0	0	0	0	0	0	0	0	0	0
Moldova	0	0	0	0	0	0	0	0	0	0	0	0	0	0	0	0	0	0	0	0	0	0	0	0	0	0	0	0	0	0	0	0	0	0	0	0	0	0	0	0	0
Mongolia	0	0	0	0	0	0	0	0	0	0	0	0	0	0	0	0	0	0	0	0	0	0	0	0	0	0	0	0	0	0	0	0	0	0	0	0	0	0	0	0	0
Montenegro	0	0	0	0	0	0	0	0	0	0	0	0	0	0	0	0	0	0	0	0	0	0	0	0	0	0	0	0	0	0	0	0	0	0	0	0	0	0	0	0	0
Morocco	0	0	0	0	0	0	0	0	0	0	0	0	0	0	0	0	0	0	0	0	0	0	0	0	0	0	0	0	0	0	0	0	0	0	0	0	0	0	0	0	0
Mozambique	0	0	0	0	0	0	0	0	0	0	0	0	0	0	0	0	0	0	0	0	0	0	0	0	0	0	0	0	0	0	0	0	0	0	0	0	0	0	0	0	0
Myanmar	0	0	0	0	0	0	0	0	0	0	0	0	0	0	0	0	0	0	0	0	0	0	0	0	0	0	0	0	0	0	0	0	0	0	0	0	0	0	0	0	0
Namibia	0	0	0	0	0	0	0	0	0	0	0	0	0	0	0	0	0	0	0	0	0	0	0	0	0	0	0	0	0	0	0	0	0	0	0	0	0	0	0	0	0
Nepal	0	0	0	0	0	0	0	0	0	0	0	0	0	0	0	0	0	0	0	0	0	0	0	0	0	0	0	0	0	0	0	0	0	0	0	0	0	0	0	0	0
Netherlands	0	0	0	0	0	0	0	0	0	0	0	0	0	0	0	0	0	0	0	0	0	0	0	0	0	0	0	0	0	0	0	0	0	0	0	0	0	0	0	0	0
New Zealand	0	0	0	0	0	0	0	0	0	0	0	0	0	0	0	0	0	0	0	0	0	0	0	0	0	0	0	0	0	0	0	0	0	0	0	0	0	0	0	0	0
Nicaragua	0	0	0	0	0	0	0	0	0	0	0	0	0	0	0	0	0	0	0	0	0	0	0	0	0	0	0	0	0	0	0	0	0	0	0	0	0	0	0	0	0
Niger	1686.43	1735.74	1610.69	1478.27	1337.16	1186.02	1017.05	838.898	649.551	447.402	231.247	0	0	0	0	0	0	0	0	0	0	0	0	0	0	0	0	0	0	0	0	0	0	0	0	0	0	0	0	0	0
Nigeria	427952	439181	451027	463459	476432	489895	502697	516112	530041	520981	510953	498892	486101	472446	457821	442145	425142	407244	388300	368172	346755	316214	283912	249765	213698	175596	135267	92702.3	47674.8	0	0	0	0	0	0	0	0	0	0	0	0
North Korea	0	0	0	0	0	0	0	0	0	0	0	0	0	0	0	0	0	0	0	0	0	0	0	0	0	0	0	0	0	0	0	0	0	0	0	0	0	0	0	0	0
Norway	0	0	0	0	0	0	0	0	0	0	0	0	0	0	0	0	0	0	0	0	0	0	0	0	0	0	0	0	0	0	0	0	0	0	0	0	0	0	0	0	0
Oman	0	0	0	0	0	0	0	0	0	0	0	0	0	0	0	0	0	0	0	0	0	0	0	0	0	0	0	0	0	0	0	0	0	0	0	0	0	0	0	0	0
Pakistan	0	0	0	0	0	0	0	0	0	0	0	0	0	0	0	0	0	0	0	0	0	0	0	0	0	0	0	0	0	0	0	0	0	0	0	0	0	0	0	0	0
Palestine	0	0	0	0	0	0	0	0	0	0	0	0	0	0	0	0	0	0	0	0	0	0	0	0	0	0	0	0	0	0	0	0	0	0	0	0	0	0	0	0	0
Panama	0	0	0	0	0	0	0	0	0	0	0	0	0	0	0	0	0	0	0	0	0	0	0	0	0	0	0	0	0	0	0	0	0	0	0	0	0	0	0	0	0
Papua New Guinea	0	0	0	0	0	0	0	0	0	0	0	0	0	0	0	0	0	0	0	0	0	0	0	0	0	0	0	0	0	0	0	0	0	0	0	0	0	0	0	0	0
Paraguay	0	0	0	0	0	0	0	0	0	0	0	0	0	0	0	0	0	0	0	0	0	0	0	0	0	0	0	0	0	0	0	0	0	0	0	0	0	0	0	0	0
Peru	0	0	0	0	0	0	0	0	0	0	0	0	0	0	0	0	0	0	0	0	0	0	0	0	0	0	0	0	0	0	0	0	0	0	0	0	0	0	0	0	0
Philippines	0	0	0	0	0	0	0	0	0	0	0	0	0	0	0	0	0	0	0	0	0	0	0	0	0	0	0	0	0	0	0	0	0	0	0	0	0	0	0	0	0
Poland	0	0	0	0	0	0	0	0	0	0	0	0	0	0	0	0	0	0	0	0	0	0	0	0	0	0	0	0	0	0	0	0	0	0	0	0	0	0	0	0	0
Portugal	0	0	0	0	0	0	0	0	0	0	0	0	0	0	0	0	0	0	0	0	0	0	0	0	0	0	0	0	0	0	0	0	0	0	0	0	0	0	0	0	0
Qatar	0	0	0	0	0	0	0	0	0	0	0	0	0	0	0	0	0	0	0	0	0	0	0	0	0	0	0	0	0	0	0	0	0	0	0	0	0	0	0	0	0
Romania	0	0	0	0	0	0	0	0	0	0	0	0	0	0	0	0	0	0	0	0	0	0	0	0	0	0	0	0	0	0	0	0	0	0	0	0	0	0	0	0	0
Russia	0	0	0	0	0	0	0	0	0	0	0	0	0	0	0	0	0	0	0	0	0	0	0	0	0	0	0	0	0	0	0	0	0	0	0	0	0	0	0	0	0
Rwanda	0	0	0	0	0	0	0	0	0	0	0	0	0	0	0	0	0	0	0	0	0	0	0	0	0	0	0	0	0	0	0	0	0	0	0	0	0	0	0	0	0
Saint Lucia	0	0	0	0	0	0	0	0	0	0	0	0	0	0	0	0	0	0	0	0	0	0	0	0	0	0	0	0	0	0	0	0	0	0	0	0	0	0	0	0	0
Saint Vincent and the Grenadines	0	0	0	0	0	0	0	0	0	0	0	0	0	0	0	0	0	0	0	0	0	0	0	0	0	0	0	0	0	0	0	0	0	0	0	0	0	0	0	0	0
Samoa	0	0	0	0	0	0	0	0	0	0	0	0	0	0	0	0	0	0	0	0	0	0	0	0	0	0	0	0	0	0	0	0	0	0	0	0	0	0	0	0	0
São Tomé and Príncipe	0	0	0	0	0	0	0	0	0	0	0	0	0	0	0	0	0	0	0	0	0	0	0	0	0	0	0	0	0	0	0	0	0	0	0	0	0	0	0	0	0
Saudi Arabia	0	0	0	0	0	0	0	0	0	0	0	0	0	0	0	0	0	0	0	0	0	0	0	0	0	0	0	0	0	0	0	0	0	0	0	0	0	0	0	0	0
Senegal	370.11	382.432	356.134	327.758	296.89	263.318	226.212	186.551	144.259	99.2116	51.2054	0	0	0	0	0	0	0	0	0	0	0	0	0	0	0	0	0	0	0	0	0	0	0	0	0	0	0	0	0	0
Serbia	0	0	0	0	0	0	0	0	0	0	0	0	0	0	0	0	0	0	0	0	0	0	0	0	0	0	0	0	0	0	0	0	0	0	0	0	0	0	0	0	0
Seychelles	0	0	0	0	0	0	0	0	0	0	0	0	0	0	0	0	0	0	0	0	0	0	0	0	0	0	0	0	0	0	0	0	0	0	0	0	0	0	0	0	0
Sierra Leone	33585.1	33691.5	33590	33393.2	33232.4	33192.9	33222.8	33416.8	33828.8	34518.4	35501	36839.9	38578.9	40531.2	42474.8	44275.3	40502.1	36268.7	31686.6	26850.4	21794.6	19492.4	17084.2	14566.5	11932.4	9170.49	6250.88	3199.44	0	0	0	0	0	0	0	0	0	0	0	0	0
Singapore	0	0	0	0	0	0	0	0	0	0	0	0	0	0	0	0	0	0	0	0	0	0	0	0	0	0	0	0	0	0	0	0	0	0	0	0	0	0	0	0	0
Slovakia	0	0	0	0	0	0	0	0	0	0	0	0	0	0	0	0	0	0	0	0	0	0	0	0	0	0	0	0	0	0	0	0	0	0	0	0	0	0	0	0	0
Slovenia	0	0	0	0	0	0	0	0	0	0	0	0	0	0	0	0	0	0	0	0	0	0	0	0	0	0	0	0	0	0	0	0	0	0	0	0	0	0	0	0	0
Solomon Islands	0	0	0	0	0	0	0	0	0	0	0	0	0	0	0	0	0	0	0	0	0	0	0	0	0	0	0	0	0	0	0	0	0	0	0	0	0	0	0	0	0
Somalia	0	0	0	0	0	0	0	0	0	0	0	0	0	0	0	0	0	0	0	0	0	0	0	0	0	0	0	0	0	0	0	0	0	0	0	0	0	0	0	0	0
South Africa	0	0	0	0	0	0	0	0	0	0	0	0	0	0	0	0	0	0	0	0	0	0	0	0	0	0	0	0	0	0	0	0	0	0	0	0	0	0	0	0	0
South Korea	0	0	0	0	0	0	0	0	0	0	0	0	0	0	0	0	0	0	0	0	0	0	0	0	0	0	0	0	0	0	0	0	0	0	0	0	0	0	0	0	0
Spain	0	0	0	0	0	0	0	0	0	0	0	0	0	0	0	0	0	0	0	0	0	0	0	0	0	0	0	0	0	0	0	0	0	0	0	0	0	0	0	0	0
Sri Lanka	0	0	0	0	0	0	0	0	0	0	0	0	0	0	0	0	0	0	0	0	0	0	0	0	0	0	0	0	0	0	0	0	0	0	0	0	0	0	0	0	0
Sudan	141827	146241	151048	156155	161447	166850	171838	177016	182394	187985	193816	199640	205749	212169	218958	226142	233281	240937	249002	225838	200767	181218	160174	137620	113534	87837	60334.6	31092.8	0	0	0	0	0	0	0	0	0	0	0	0	0
Suriname	0	0	0	0	0	0	0	0	0	0	0	0	0	0	0	0	0	0	0	0	0	0	0	0	0	0	0	0	0	0	0	0	0	0	0	0	0	0	0	0	0
Swaziland	0	0	0	0	0	0	0	0	0	0	0	0	0	0	0	0	0	0	0	0	0	0	0	0	0	0	0	0	0	0	0	0	0	0	0	0	0	0	0	0	0
Sweden	0	0	0	0	0	0	0	0	0	0	0	0	0	0	0	0	0	0	0	0	0	0	0	0	0	0	0	0	0	0	0	0	0	0	0	0	0	0	0	0	0
Switzerland	0	0	0	0	0	0	0	0	0	0	0	0	0	0	0	0	0	0	0	0	0	0	0	0	0	0	0	0	0	0	0	0	0	0	0	0	0	0	0	0	0
Syria	0	0	0	0	0	0	0	0	0	0	0	0	0	0	0	0	0	0	0	0	0	0	0	0	0	0	0	0	0	0	0	0	0	0	0	0	0	0	0	0	0
Tajikistan	0	0	0	0	0	0	0	0	0	0	0	0	0	0	0	0	0	0	0	0	0	0	0	0	0	0	0	0	0	0	0	0	0	0	0	0	0	0	0	0	0
Tanzania	46980.8	48542.8	50257.4	52066.7	53898.5	55712.3	57282.9	58827.2	60377.1	59433.5	58425.5	57235.9	55974.3	54637.4	53219.9	51712.7	50072.4	48344	46507.2	44547.2	42452.4	38859.1	35052.3	30993.1	26648.3	21997.2	17022.9	11708.1	6040.33	0	0	0	0	0	0	0	0	0	0	0	0
Thailand	0	0	0	0	0	0	0	0	0	0	0	0	0	0	0	0	0	0	0	0	0	0	0	0	0	0	0	0	0	0	0	0	0	0	0	0	0	0	0	0	0
The Bahamas	0	0	0	0	0	0	0	0	0	0	0	0	0	0	0	0	0	0	0	0	0	0	0	0	0	0	0	0	0	0	0	0	0	0	0	0	0	0	0	0	0
The Gambia	0	0	0	0	0	0	0	0	0	0	0	0	0	0	0	0	0	0	0	0	0	0	0	0	0	0	0	0	0	0	0	0	0	0	0	0	0	0	0	0	0
Timor-Leste	0	0	0	0	0	0	0	0	0	0	0	0	0	0	0	0	0	0	0	0	0	0	0	0	0	0	0	0	0	0	0	0	0	0	0	0	0	0	0	0	0
Togo	7742.61	7970.37	7803.24	7621.9	7423.67	7207.03	6966.46	6705.65	6423.61	6119.22	5790.69	5432.44	5047.76	4634.72	4191.49	3716.5	3205.44	2662.93	2086.88	1475.5	827.529	744.065	655.182	560.782	460.805	355.045	243.088	124.901	0	0	0	0	0	0	0	0	0	0	0	0	0
Tonga	0	0	0	0	0	0	0	0	0	0	0	0	0	0	0	0	0	0	0	0	0	0	0	0	0	0	0	0	0	0	0	0	0	0	0	0	0	0	0	0	0
Trinidad and Tobago	0	0	0	0	0	0	0	0	0	0	0	0	0	0	0	0	0	0	0	0	0	0	0	0	0	0	0	0	0	0	0	0	0	0	0	0	0	0	0	0	0
Tunisia	0	0	0	0	0	0	0	0	0	0	0	0	0	0	0	0	0	0	0	0	0	0	0	0	0	0	0	0	0	0	0	0	0	0	0	0	0	0	0	0	0
Turkey	0	0	0	0	0	0	0	0	0	0	0	0	0	0	0	0	0	0	0	0	0	0	0	0	0	0	0	0	0	0	0	0	0	0	0	0	0	0	0	0	0
Turkmenistan	0	0	0	0	0	0	0	0	0	0	0	0	0	0	0	0	0	0	0	0	0	0	0	0	0	0	0	0	0	0	0	0	0	0	0	0	0	0	0	0	0
Uganda	34971.4	36026.8	37119.7	38249	39418.6	40633.9	41715.1	42863.8	44086.4	45387.4	44468.6	43460.1	42388.6	41240.5	40007	38675.6	37188.3	35591.6	33863	31980.2	29927.1	27573.3	25019.6	22247.4	19239.3	15976.9	12427.3	8595.24	4459.71	0	0	0	0	0	0	0	0	0	0	0	0
Ukraine	0	0	0	0	0	0	0	0	0	0	0	0	0	0	0	0	0	0	0	0	0	0	0	0	0	0	0	0	0	0	0	0	0	0	0	0	0	0	0	0	0
United Arab Emirates	0	0	0	0	0	0	0	0	0	0	0	0	0	0	0	0	0	0	0	0	0	0	0	0	0	0	0	0	0	0	0	0	0	0	0	0	0	0	0	0	0
United Kingdom	0	0	0	0	0	0	0	0	0	0	0	0	0	0	0	0	0	0	0	0	0	0	0	0	0	0	0	0	0	0	0	0	0	0	0	0	0	0	0	0	0
United States	0	0	0	0	0	0	0	0	0	0	0	0	0	0	0	0	0	0	0	0	0	0	0	0	0	0	0	0	0	0	0	0	0	0	0	0	0	0	0	0	0
Uruguay	0	0	0	0	0	0	0	0	0	0	0	0	0	0	0	0	0	0	0	0	0	0	0	0	0	0	0	0	0	0	0	0	0	0	0	0	0	0	0	0	0
Uzbekistan	0	0	0	0	0	0	0	0	0	0	0	0	0	0	0	0	0	0	0	0	0	0	0	0	0	0	0	0	0	0	0	0	0	0	0	0	0	0	0	0	0
Vanuatu	0	0	0	0	0	0	0	0	0	0	0	0	0	0	0	0	0	0	0	0	0	0	0	0	0	0	0	0	0	0	0	0	0	0	0	0	0	0	0	0	0
Venezuela	0	0	0	0	0	0	0	0	0	0	0	0	0	0	0	0	0	0	0	0	0	0	0	0	0	0	0	0	0	0	0	0	0	0	0	0	0	0	0	0	0
Vietnam	0	0	0	0	0	0	0	0	0	0	0	0	0	0	0	0	0	0	0	0	0	0	0	0	0	0	0	0	0	0	0	0	0	0	0	0	0	0	0	0	0
Yemen	0	0	0	0	0	0	0	0	0	0	0	0	0	0	0	0	0	0	0	0	0	0	0	0	0	0	0	0	0	0	0	0	0	0	0	0	0	0	0	0	0
Zambia	0	0	0	0	0	0	0	0	0	0	0	0	0	0	0	0	0	0	0	0	0	0	0	0	0	0	0	0	0	0	0	0	0	0	0	0	0	0	0	0	0
Zimbabwe	0	0	0	0	0	0	0	0	0	0	0	0	0	0	0	0	0	0	0	0	0	0	0	0	0	0	0	0	0	0	0	0	0	0	0	0	0	0	0	0	0

## Sheet: Total cases 15-65
	1990	1991	1992	1993	1994	1995	1996	1997	1998	1999	2000	2001	2002	2003	2004	2005	2006	2007	2008	2009	2010	2011	2012	2013	2014	2015	2016	2017	2018	2019	2020	2021	2022	2023	2024	2025	2026	2027	2028	2029	2030
WORLD
Men	2.13452e+06	2.19668e+06	2.25201e+06	2.31071e+06	2.37114e+06	2.43239e+06	2.47061e+06	2.50979e+06	2.54984e+06	2.55989e+06	2.55682e+06	2.54546e+06	2.51334e+06	2.48062e+06	2.44646e+06	2.41014e+06	2.35429e+06	2.29116e+06	2.22454e+06	2.11824e+06	2.00377e+06	1.88804e+06	1.76482e+06	1.63347e+06	1.49344e+06	1.34398e+06	1.18086e+06	1.00788e+06	823902	684388	618788	546794	470480	424200	374778	321960	264832	204333	140188	72152.1	0
Women	1.79566e+06	1.84717e+06	1.89175e+06	1.93892e+06	1.98715e+06	2.03553e+06	2.06515e+06	2.09512e+06	2.12549e+06	2.13199e+06	2.12711e+06	2.11603e+06	2.08801e+06	2.05953e+06	2.02979e+06	1.99816e+06	1.95097e+06	1.89799e+06	1.842e+06	1.75247e+06	1.65615e+06	1.56149e+06	1.46088e+06	1.35377e+06	1.23967e+06	1.11797e+06	985573	845231	696056	582841	527351	466635	402246	362770	320564	275418	226649	174934	120050	61799.8	0
Total	3.93019e+06	4.04384e+06	4.14376e+06	4.24963e+06	4.35829e+06	4.46792e+06	4.53576e+06	4.60491e+06	4.67533e+06	4.69188e+06	4.68393e+06	4.66149e+06	4.60135e+06	4.54015e+06	4.47625e+06	4.40829e+06	4.30526e+06	4.18915e+06	4.06654e+06	3.8707e+06	3.65992e+06	3.44953e+06	3.2257e+06	2.98724e+06	2.73311e+06	2.46195e+06	2.16643e+06	1.85311e+06	1.51996e+06	1.26723e+06	1.14614e+06	1.01343e+06	872726	786970	695341	597378	491481	379267	260238	133952	0
MEN
Afghanistan	0	0	0	0	0	0	0	0	0	0	0	0	0	0	0	0	0	0	0	0	0	0	0	0	0	0	0	0	0	0	0	0	0	0	0	0	0	0	0	0	0
Albania	0	0	0	0	0	0	0	0	0	0	0	0	0	0	0	0	0	0	0	0	0	0	0	0	0	0	0	0	0	0	0	0	0	0	0	0	0	0	0	0	0
Algeria	0	0	0	0	0	0	0	0	0	0	0	0	0	0	0	0	0	0	0	0	0	0	0	0	0	0	0	0	0	0	0	0	0	0	0	0	0	0	0	0	0
Angola	9743.76	10004.9	10315.6	10661.3	11023.6	11392.2	11689.9	12000.5	12334.7	12705.4	13119	13520.8	13977	14475.9	15004.5	15554.9	15340.9	15109.6	14856.8	14581.2	14280.4	13110.1	11867.9	10536.9	9100.96	7548.59	5861.06	4045.67	2095.19	0	0	0	0	0	0	0	0	0	0	0	0
Antigua and Barbuda	0	0	0	0	0	0	0	0	0	0	0	0	0	0	0	0	0	0	0	0	0	0	0	0	0	0	0	0	0	0	0	0	0	0	0	0	0	0	0	0	0
Argentina	0	0	0	0	0	0	0	0	0	0	0	0	0	0	0	0	0	0	0	0	0	0	0	0	0	0	0	0	0	0	0	0	0	0	0	0	0	0	0	0	0
Armenia	0	0	0	0	0	0	0	0	0	0	0	0	0	0	0	0	0	0	0	0	0	0	0	0	0	0	0	0	0	0	0	0	0	0	0	0	0	0	0	0	0
Australia	0	0	0	0	0	0	0	0	0	0	0	0	0	0	0	0	0	0	0	0	0	0	0	0	0	0	0	0	0	0	0	0	0	0	0	0	0	0	0	0	0
Austria	0	0	0	0	0	0	0	0	0	0	0	0	0	0	0	0	0	0	0	0	0	0	0	0	0	0	0	0	0	0	0	0	0	0	0	0	0	0	0	0	0
Azerbaijan	0	0	0	0	0	0	0	0	0	0	0	0	0	0	0	0	0	0	0	0	0	0	0	0	0	0	0	0	0	0	0	0	0	0	0	0	0	0	0	0	0
Bahrain	0	0	0	0	0	0	0	0	0	0	0	0	0	0	0	0	0	0	0	0	0	0	0	0	0	0	0	0	0	0	0	0	0	0	0	0	0	0	0	0	0
Bangladesh	0	0	0	0	0	0	0	0	0	0	0	0	0	0	0	0	0	0	0	0	0	0	0	0	0	0	0	0	0	0	0	0	0	0	0	0	0	0	0	0	0
Barbados	0	0	0	0	0	0	0	0	0	0	0	0	0	0	0	0	0	0	0	0	0	0	0	0	0	0	0	0	0	0	0	0	0	0	0	0	0	0	0	0	0
Belarus	0	0	0	0	0	0	0	0	0	0	0	0	0	0	0	0	0	0	0	0	0	0	0	0	0	0	0	0	0	0	0	0	0	0	0	0	0	0	0	0	0
Belgium	0	0	0	0	0	0	0	0	0	0	0	0	0	0	0	0	0	0	0	0	0	0	0	0	0	0	0	0	0	0	0	0	0	0	0	0	0	0	0	0	0
Belize	0	0	0	0	0	0	0	0	0	0	0	0	0	0	0	0	0	0	0	0	0	0	0	0	0	0	0	0	0	0	0	0	0	0	0	0	0	0	0	0	0
Benin	39771.7	41440.9	41247.2	40994.9	40587	39968.3	38788.1	37453.4	36003.5	34481.3	32901.6	31278.8	29551.9	27672.1	25593	23283.9	20649.8	17798.8	14714.3	11382.1	7789.36	7037.86	6229.75	5361.72	4430.5	3432.55	2360.1	1217.34	0	0	0	0	0	0	0	0	0	0	0	0	0
Bhutan	0	0	0	0	0	0	0	0	0	0	0	0	0	0	0	0	0	0	0	0	0	0	0	0	0	0	0	0	0	0	0	0	0	0	0	0	0	0	0	0	0
Bolivia	0	0	0	0	0	0	0	0	0	0	0	0	0	0	0	0	0	0	0	0	0	0	0	0	0	0	0	0	0	0	0	0	0	0	0	0	0	0	0	0	0
Bosnia and Herzegovina	0	0	0	0	0	0	0	0	0	0	0	0	0	0	0	0	0	0	0	0	0	0	0	0	0	0	0	0	0	0	0	0	0	0	0	0	0	0	0	0	0
Botswana	0	0	0	0	0	0	0	0	0	0	0	0	0	0	0	0	0	0	0	0	0	0	0	0	0	0	0	0	0	0	0	0	0	0	0	0	0	0	0	0	0
Brazil	0	0	0	0	0	0	0	0	0	0	0	0	0	0	0	0	0	0	0	0	0	0	0	0	0	0	0	0	0	0	0	0	0	0	0	0	0	0	0	0	0
Brunei	0	0	0	0	0	0	0	0	0	0	0	0	0	0	0	0	0	0	0	0	0	0	0	0	0	0	0	0	0	0	0	0	0	0	0	0	0	0	0	0	0
Bulgaria	0	0	0	0	0	0	0	0	0	0	0	0	0	0	0	0	0	0	0	0	0	0	0	0	0	0	0	0	0	0	0	0	0	0	0	0	0	0	0	0	0
Burkina Faso	39531.6	40554	37513.4	34331.8	30976.4	27414.3	23514	19396.2	15019.8	10347.8	5350.19	0	0	0	0	0	0	0	0	0	0	0	0	0	0	0	0	0	0	0	0	0	0	0	0	0	0	0	0	0	0
Burundi	22850.3	23107	23374.2	23660.7	23973.8	24326.2	24663.7	25030.4	25467.3	26023.5	26729.5	27885.6	29207	30657.7	32181.7	33733.4	32641.5	31351.6	29850.8	28132.8	26195	23611.6	20848.6	17892.1	14733.9	11371.4	7785.45	3999.53	0	0	0	0	0	0	0	0	0	0	0	0	0
Cambodia	0	0	0	0	0	0	0	0	0	0	0	0	0	0	0	0	0	0	0	0	0	0	0	0	0	0	0	0	0	0	0	0	0	0	0	0	0	0	0	0	0
Cameroon	158872	163284	167980	172966	178273	183918	189284	195034	201151	207591	205736	203017	200045	196797	193259	189397	184624	179599	174217	168370	161997	152836	143061	132620	121474	109570	96659.8	82947.1	68361.4	52834.7	36304.1	18680.5	0	0	0	0	0	0	0	0	0
Canada	0	0	0	0	0	0	0	0	0	0	0	0	0	0	0	0	0	0	0	0	0	0	0	0	0	0	0	0	0	0	0	0	0	0	0	0	0	0	0	0	0
Cape Verde	0	0	0	0	0	0	0	0	0	0	0	0	0	0	0	0	0	0	0	0	0	0	0	0	0	0	0	0	0	0	0	0	0	0	0	0	0	0	0	0	0
Central African Republic	52167.9	53262	54547.1	55981.2	57503.9	59072.2	60425.3	61808.1	63224.9	64692.2	63421.4	61657.3	59883.3	58084.1	56243.5	54358.7	52400.6	50410.5	48360.9	46226.3	43981.4	41341.9	38557.4	35616.4	32511.1	29226.6	25653.6	21917.8	17987.8	13838.4	9459.64	4840.92	0	0	0	0	0	0	0	0	0
Chad	30613.8	31433.3	32315	33265.3	34294.2	35407.9	36442.7	37587.5	38846.3	38450.5	38041.7	37486	36922.7	36302.7	35581.6	34735.9	33615.9	32377.9	31027	29568.1	27996.1	25307.6	22439.2	19360.8	16044.8	12469.2	8592.75	4444.47	0	0	0	0	0	0	0	0	0	0	0	0	0
Chile	0	0	0	0	0	0	0	0	0	0	0	0	0	0	0	0	0	0	0	0	0	0	0	0	0	0	0	0	0	0	0	0	0	0	0	0	0	0	0	0	0
China	0	0	0	0	0	0	0	0	0	0	0	0	0	0	0	0	0	0	0	0	0	0	0	0	0	0	0	0	0	0	0	0	0	0	0	0	0	0	0	0	0
Colombia	0	0	0	0	0	0	0	0	0	0	0	0	0	0	0	0	0	0	0	0	0	0	0	0	0	0	0	0	0	0	0	0	0	0	0	0	0	0	0	0	0
Comoros	0	0	0	0	0	0	0	0	0	0	0	0	0	0	0	0	0	0	0	0	0	0	0	0	0	0	0	0	0	0	0	0	0	0	0	0	0	0	0	0	0
Congo	6505.43	6699.92	6905.08	7121.52	7349.23	7587.86	7828.42	8080.24	8339.57	8602.29	8865.57	9082.39	8779.6	8460.09	8127.46	7782.9	7433.92	7066.54	6672.68	6245.16	5779.43	5184.93	4555.2	3890.49	3190.74	2454.72	1676.56	859.788	0	0	0	0	0	0	0	0	0	0	0	0	0
Costa Rica	0	0	0	0	0	0	0	0	0	0	0	0	0	0	0	0	0	0	0	0	0	0	0	0	0	0	0	0	0	0	0	0	0	0	0	0	0	0	0	0	0
Côte d’Ivoire	106041	109766	113734	117895	122164	126464	121443	115936	109883	103242	96006.6	87516	78683.1	69593.4	60312.6	50868.6	41249.8	31397.9	21276.3	10831.3	0	0	0	0	0	0	0	0	0	0	0	0	0	0	0	0	0	0	0	0	0
Croatia	0	0	0	0	0	0	0	0	0	0	0	0	0	0	0	0	0	0	0	0	0	0	0	0	0	0	0	0	0	0	0	0	0	0	0	0	0	0	0	0	0
Cuba	0	0	0	0	0	0	0	0	0	0	0	0	0	0	0	0	0	0	0	0	0	0	0	0	0	0	0	0	0	0	0	0	0	0	0	0	0	0	0	0	0
Cyprus	0	0	0	0	0	0	0	0	0	0	0	0	0	0	0	0	0	0	0	0	0	0	0	0	0	0	0	0	0	0	0	0	0	0	0	0	0	0	0	0	0
Czech Republic	0	0	0	0	0	0	0	0	0	0	0	0	0	0	0	0	0	0	0	0	0	0	0	0	0	0	0	0	0	0	0	0	0	0	0	0	0	0	0	0	0
Democratic Republic of the Congo	612292	633559	657199	681854	706122	729315	745797	761363	777253	794821	814920	835399	834190	834079	834376	834569	830864	827668	824495	820813	816293	798533	779692	759493	737742	714218	686355	656836	625299	591416	554912	513933	470480	424200	374778	321960	264832	204333	140188	72152.1	0
Denmark	0	0	0	0	0	0	0	0	0	0	0	0	0	0	0	0	0	0	0	0	0	0	0	0	0	0	0	0	0	0	0	0	0	0	0	0	0	0	0	0	0
Djibouti	0	0	0	0	0	0	0	0	0	0	0	0	0	0	0	0	0	0	0	0	0	0	0	0	0	0	0	0	0	0	0	0	0	0	0	0	0	0	0	0	0
Dominican Republic	0	0	0	0	0	0	0	0	0	0	0	0	0	0	0	0	0	0	0	0	0	0	0	0	0	0	0	0	0	0	0	0	0	0	0	0	0	0	0	0	0
Ecuador	0	0	0	0	0	0	0	0	0	0	0	0	0	0	0	0	0	0	0	0	0	0	0	0	0	0	0	0	0	0	0	0	0	0	0	0	0	0	0	0	0
Egypt	0	0	0	0	0	0	0	0	0	0	0	0	0	0	0	0	0	0	0	0	0	0	0	0	0	0	0	0	0	0	0	0	0	0	0	0	0	0	0	0	0
El Salvador	0	0	0	0	0	0	0	0	0	0	0	0	0	0	0	0	0	0	0	0	0	0	0	0	0	0	0	0	0	0	0	0	0	0	0	0	0	0	0	0	0
Equatorial Guinea	3275.88	3339.18	3412.18	3493.19	3580.96	3675.57	3776.01	3884.15	4003.57	4138.75	4158.48	4168.07	4186.35	4207.65	4224.8	4233.14	4211.94	4183	4146.28	4103.35	4054.16	3827.7	3587.95	3330.37	3050.91	2748.16	2417.51	2066.43	1695	1303.34	890.862	455.62	0	0	0	0	0	0	0	0	0
Eritrea	0	0	0	0	0	0	0	0	0	0	0	0	0	0	0	0	0	0	0	0	0	0	0	0	0	0	0	0	0	0	0	0	0	0	0	0	0	0	0	0	0
Estonia	0	0	0	0	0	0	0	0	0	0	0	0	0	0	0	0	0	0	0	0	0	0	0	0	0	0	0	0	0	0	0	0	0	0	0	0	0	0	0	0	0
Ethiopia	67463.5	69578.1	71878.9	74325.7	76859.6	79435.7	81823.4	84233.1	86698.2	89294.9	92078.8	94677.3	92731.5	90692	88462.2	86004.7	83257	80291.1	77115.1	73728.1	70095.9	66604.3	62794.6	58628.6	54064.9	49067.2	43544.5	37571.5	31112.4	24139.2	16635.6	8584.24	0	0	0	0	0	0	0	0	0
Federated States of Micronesia	0	0	0	0	0	0	0	0	0	0	0	0	0	0	0	0	0	0	0	0	0	0	0	0	0	0	0	0	0	0	0	0	0	0	0	0	0	0	0	0	0
Fiji	0	0	0	0	0	0	0	0	0	0	0	0	0	0	0	0	0	0	0	0	0	0	0	0	0	0	0	0	0	0	0	0	0	0	0	0	0	0	0	0	0
Finland	0	0	0	0	0	0	0	0	0	0	0	0	0	0	0	0	0	0	0	0	0	0	0	0	0	0	0	0	0	0	0	0	0	0	0	0	0	0	0	0	0
France	0	0	0	0	0	0	0	0	0	0	0	0	0	0	0	0	0	0	0	0	0	0	0	0	0	0	0	0	0	0	0	0	0	0	0	0	0	0	0	0	0
Gabon	0	0	0	0	0	0	0	0	0	0	0	0	0	0	0	0	0	0	0	0	0	0	0	0	0	0	0	0	0	0	0	0	0	0	0	0	0	0	0	0	0
Georgia	0	0	0	0	0	0	0	0	0	0	0	0	0	0	0	0	0	0	0	0	0	0	0	0	0	0	0	0	0	0	0	0	0	0	0	0	0	0	0	0	0
Germany	0	0	0	0	0	0	0	0	0	0	0	0	0	0	0	0	0	0	0	0	0	0	0	0	0	0	0	0	0	0	0	0	0	0	0	0	0	0	0	0	0
Ghana	75227.3	77350.8	75473.6	73441.5	71230.7	68828.9	66102.8	63208.4	60129.9	56843.7	53330.2	49453.1	45326.6	40958.5	36355.3	31505.4	26326.5	20893.5	15165.4	9107.7	2703.12	2544.28	2374.75	2194.24	2002.78	1800	1583.16	1354.09	1112.01	856.159	585.901	300.329	0	0	0	0	0	0	0	0	0
Greece	0	0	0	0	0	0	0	0	0	0	0	0	0	0	0	0	0	0	0	0	0	0	0	0	0	0	0	0	0	0	0	0	0	0	0	0	0	0	0	0	0
Grenada	0	0	0	0	0	0	0	0	0	0	0	0	0	0	0	0	0	0	0	0	0	0	0	0	0	0	0	0	0	0	0	0	0	0	0	0	0	0	0	0	0
Guatemala	0	0	0	0	0	0	0	0	0	0	0	0	0	0	0	0	0	0	0	0	0	0	0	0	0	0	0	0	0	0	0	0	0	0	0	0	0	0	0	0	0
Guinea	35695.3	37513.2	39670.2	41974.7	44206.1	46238.4	44814.1	42994.8	40910.6	38687.6	36392.4	33875.1	31291.1	28640.7	25917.4	23102.4	20133.6	17047.8	13797.6	10344.2	6662.87	6001.57	5299.7	4551.89	3753.66	2901.79	1989.63	1023.38	0	0	0	0	0	0	0	0	0	0	0	0	0
Guinea-Bissau	3713.23	3814.72	3516.23	3195.56	2862.49	2518.18	2144.32	1757.97	1354.02	927.772	476.901	0	0	0	0	0	0	0	0	0	0	0	0	0	0	0	0	0	0	0	0	0	0	0	0	0	0	0	0	0	0
Guyana	0	0	0	0	0	0	0	0	0	0	0	0	0	0	0	0	0	0	0	0	0	0	0	0	0	0	0	0	0	0	0	0	0	0	0	0	0	0	0	0	0
Haiti	0	0	0	0	0	0	0	0	0	0	0	0	0	0	0	0	0	0	0	0	0	0	0	0	0	0	0	0	0	0	0	0	0	0	0	0	0	0	0	0	0
Honduras	0	0	0	0	0	0	0	0	0	0	0	0	0	0	0	0	0	0	0	0	0	0	0	0	0	0	0	0	0	0	0	0	0	0	0	0	0	0	0	0	0
Hungary	0	0	0	0	0	0	0	0	0	0	0	0	0	0	0	0	0	0	0	0	0	0	0	0	0	0	0	0	0	0	0	0	0	0	0	0	0	0	0	0	0
Iceland	0	0	0	0	0	0	0	0	0	0	0	0	0	0	0	0	0	0	0	0	0	0	0	0	0	0	0	0	0	0	0	0	0	0	0	0	0	0	0	0	0
India	0	0	0	0	0	0	0	0	0	0	0	0	0	0	0	0	0	0	0	0	0	0	0	0	0	0	0	0	0	0	0	0	0	0	0	0	0	0	0	0	0
Indonesia	0	0	0	0	0	0	0	0	0	0	0	0	0	0	0	0	0	0	0	0	0	0	0	0	0	0	0	0	0	0	0	0	0	0	0	0	0	0	0	0	0
Iran	0	0	0	0	0	0	0	0	0	0	0	0	0	0	0	0	0	0	0	0	0	0	0	0	0	0	0	0	0	0	0	0	0	0	0	0	0	0	0	0	0
Iraq	0	0	0	0	0	0	0	0	0	0	0	0	0	0	0	0	0	0	0	0	0	0	0	0	0	0	0	0	0	0	0	0	0	0	0	0	0	0	0	0	0
Ireland	0	0	0	0	0	0	0	0	0	0	0	0	0	0	0	0	0	0	0	0	0	0	0	0	0	0	0	0	0	0	0	0	0	0	0	0	0	0	0	0	0
Israel	0	0	0	0	0	0	0	0	0	0	0	0	0	0	0	0	0	0	0	0	0	0	0	0	0	0	0	0	0	0	0	0	0	0	0	0	0	0	0	0	0
Italy	0	0	0	0	0	0	0	0	0	0	0	0	0	0	0	0	0	0	0	0	0	0	0	0	0	0	0	0	0	0	0	0	0	0	0	0	0	0	0	0	0
Jamaica	0	0	0	0	0	0	0	0	0	0	0	0	0	0	0	0	0	0	0	0	0	0	0	0	0	0	0	0	0	0	0	0	0	0	0	0	0	0	0	0	0
Japan	0	0	0	0	0	0	0	0	0	0	0	0	0	0	0	0	0	0	0	0	0	0	0	0	0	0	0	0	0	0	0	0	0	0	0	0	0	0	0	0	0
Jordan	0	0	0	0	0	0	0	0	0	0	0	0	0	0	0	0	0	0	0	0	0	0	0	0	0	0	0	0	0	0	0	0	0	0	0	0	0	0	0	0	0
Kazakhstan	0	0	0	0	0	0	0	0	0	0	0	0	0	0	0	0	0	0	0	0	0	0	0	0	0	0	0	0	0	0	0	0	0	0	0	0	0	0	0	0	0
Kenya	0	0	0	0	0	0	0	0	0	0	0	0	0	0	0	0	0	0	0	0	0	0	0	0	0	0	0	0	0	0	0	0	0	0	0	0	0	0	0	0	0
Kiribati	0	0	0	0	0	0	0	0	0	0	0	0	0	0	0	0	0	0	0	0	0	0	0	0	0	0	0	0	0	0	0	0	0	0	0	0	0	0	0	0	0
Kuwait	0	0	0	0	0	0	0	0	0	0	0	0	0	0	0	0	0	0	0	0	0	0	0	0	0	0	0	0	0	0	0	0	0	0	0	0	0	0	0	0	0
Kyrgyzstan	0	0	0	0	0	0	0	0	0	0	0	0	0	0	0	0	0	0	0	0	0	0	0	0	0	0	0	0	0	0	0	0	0	0	0	0	0	0	0	0	0
Laos	0	0	0	0	0	0	0	0	0	0	0	0	0	0	0	0	0	0	0	0	0	0	0	0	0	0	0	0	0	0	0	0	0	0	0	0	0	0	0	0	0
Latvia	0	0	0	0	0	0	0	0	0	0	0	0	0	0	0	0	0	0	0	0	0	0	0	0	0	0	0	0	0	0	0	0	0	0	0	0	0	0	0	0	0
Lebanon	0	0	0	0	0	0	0	0	0	0	0	0	0	0	0	0	0	0	0	0	0	0	0	0	0	0	0	0	0	0	0	0	0	0	0	0	0	0	0	0	0
Lesotho	0	0	0	0	0	0	0	0	0	0	0	0	0	0	0	0	0	0	0	0	0	0	0	0	0	0	0	0	0	0	0	0	0	0	0	0	0	0	0	0	0
Liberia	41597.9	40928.1	40359.2	40151.6	40614.7	41889.4	44441.2	48005.8	52059.8	55971	59353.7	61484.9	62985.5	64203	65582	67402.6	69737.4	67060.4	64199.8	60905.6	57068.4	52424.7	47291.6	41742.2	35828.3	29550.3	22841.5	15704.9	8102.41	0	0	0	0	0	0	0	0	0	0	0	0
Libya	0	0	0	0	0	0	0	0	0	0	0	0	0	0	0	0	0	0	0	0	0	0	0	0	0	0	0	0	0	0	0	0	0	0	0	0	0	0	0	0	0
Lithuania	0	0	0	0	0	0	0	0	0	0	0	0	0	0	0	0	0	0	0	0	0	0	0	0	0	0	0	0	0	0	0	0	0	0	0	0	0	0	0	0	0
Luxembourg	0	0	0	0	0	0	0	0	0	0	0	0	0	0	0	0	0	0	0	0	0	0	0	0	0	0	0	0	0	0	0	0	0	0	0	0	0	0	0	0	0
Macedonia	0	0	0	0	0	0	0	0	0	0	0	0	0	0	0	0	0	0	0	0	0	0	0	0	0	0	0	0	0	0	0	0	0	0	0	0	0	0	0	0	0
Madagascar	0	0	0	0	0	0	0	0	0	0	0	0	0	0	0	0	0	0	0	0	0	0	0	0	0	0	0	0	0	0	0	0	0	0	0	0	0	0	0	0	0
Malawi	17977.3	18442.1	18731.8	18929.7	19141.9	19435.7	19707	20119.1	19763.9	19404.1	19007.4	18540.2	18046.7	17535.5	17014	16479.6	15919.6	15321.8	14680.5	13993.1	13254.1	11956.1	10592.3	9135.76	7563.13	5865.6	4046.79	2090.36	0	0	0	0	0	0	0	0	0	0	0	0	0
Malaysia	0	0	0	0	0	0	0	0	0	0	0	0	0	0	0	0	0	0	0	0	0	0	0	0	0	0	0	0	0	0	0	0	0	0	0	0	0	0	0	0	0
Maldives	0	0	0	0	0	0	0	0	0	0	0	0	0	0	0	0	0	0	0	0	0	0	0	0	0	0	0	0	0	0	0	0	0	0	0	0	0	0	0	0	0
Mali	9891.08	10078.8	9290.68	8489.37	7650.79	6759.73	5786.31	4761.5	3678.05	2528.97	1306.04	0	0	0	0	0	0	0	0	0	0	0	0	0	0	0	0	0	0	0	0	0	0	0	0	0	0	0	0	0	0
Malta	0	0	0	0	0	0	0	0	0	0	0	0	0	0	0	0	0	0	0	0	0	0	0	0	0	0	0	0	0	0	0	0	0	0	0	0	0	0	0	0	0
Mauritania	0	0	0	0	0	0	0	0	0	0	0	0	0	0	0	0	0	0	0	0	0	0	0	0	0	0	0	0	0	0	0	0	0	0	0	0	0	0	0	0	0
Mauritius	0	0	0	0	0	0	0	0	0	0	0	0	0	0	0	0	0	0	0	0	0	0	0	0	0	0	0	0	0	0	0	0	0	0	0	0	0	0	0	0	0
Mexico	0	0	0	0	0	0	0	0	0	0	0	0	0	0	0	0	0	0	0	0	0	0	0	0	0	0	0	0	0	0	0	0	0	0	0	0	0	0	0	0	0
Moldova	0	0	0	0	0	0	0	0	0	0	0	0	0	0	0	0	0	0	0	0	0	0	0	0	0	0	0	0	0	0	0	0	0	0	0	0	0	0	0	0	0
Mongolia	0	0	0	0	0	0	0	0	0	0	0	0	0	0	0	0	0	0	0	0	0	0	0	0	0	0	0	0	0	0	0	0	0	0	0	0	0	0	0	0	0
Montenegro	0	0	0	0	0	0	0	0	0	0	0	0	0	0	0	0	0	0	0	0	0	0	0	0	0	0	0	0	0	0	0	0	0	0	0	0	0	0	0	0	0
Morocco	0	0	0	0	0	0	0	0	0	0	0	0	0	0	0	0	0	0	0	0	0	0	0	0	0	0	0	0	0	0	0	0	0	0	0	0	0	0	0	0	0
Mozambique	0	0	0	0	0	0	0	0	0	0	0	0	0	0	0	0	0	0	0	0	0	0	0	0	0	0	0	0	0	0	0	0	0	0	0	0	0	0	0	0	0
Myanmar	0	0	0	0	0	0	0	0	0	0	0	0	0	0	0	0	0	0	0	0	0	0	0	0	0	0	0	0	0	0	0	0	0	0	0	0	0	0	0	0	0
Namibia	0	0	0	0	0	0	0	0	0	0	0	0	0	0	0	0	0	0	0	0	0	0	0	0	0	0	0	0	0	0	0	0	0	0	0	0	0	0	0	0	0
Nepal	0	0	0	0	0	0	0	0	0	0	0	0	0	0	0	0	0	0	0	0	0	0	0	0	0	0	0	0	0	0	0	0	0	0	0	0	0	0	0	0	0
Netherlands	0	0	0	0	0	0	0	0	0	0	0	0	0	0	0	0	0	0	0	0	0	0	0	0	0	0	0	0	0	0	0	0	0	0	0	0	0	0	0	0	0
New Zealand	0	0	0	0	0	0	0	0	0	0	0	0	0	0	0	0	0	0	0	0	0	0	0	0	0	0	0	0	0	0	0	0	0	0	0	0	0	0	0	0	0
Nicaragua	0	0	0	0	0	0	0	0	0	0	0	0	0	0	0	0	0	0	0	0	0	0	0	0	0	0	0	0	0	0	0	0	0	0	0	0	0	0	0	0	0
Niger	1536.09	1583.19	1475.64	1362.84	1241.1	1108.17	961.863	801.249	625.312	433.509	225.352	0	0	0	0	0	0	0	0	0	0	0	0	0	0	0	0	0	0	0	0	0	0	0	0	0	0	0	0	0	0
Nigeria	498852	511829	525756	540637	556472	573228	588457	604798	622111	612330	601562	587273	572354	556612	539888	522056	501410	479887	457283	433403	408092	372052	334110	294121	251943	207365	159707	109486	56348	0	0	0	0	0	0	0	0	0	0	0	0
North Korea	0	0	0	0	0	0	0	0	0	0	0	0	0	0	0	0	0	0	0	0	0	0	0	0	0	0	0	0	0	0	0	0	0	0	0	0	0	0	0	0	0
Norway	0	0	0	0	0	0	0	0	0	0	0	0	0	0	0	0	0	0	0	0	0	0	0	0	0	0	0	0	0	0	0	0	0	0	0	0	0	0	0	0	0
Oman	0	0	0	0	0	0	0	0	0	0	0	0	0	0	0	0	0	0	0	0	0	0	0	0	0	0	0	0	0	0	0	0	0	0	0	0	0	0	0	0	0
Pakistan	0	0	0	0	0	0	0	0	0	0	0	0	0	0	0	0	0	0	0	0	0	0	0	0	0	0	0	0	0	0	0	0	0	0	0	0	0	0	0	0	0
Palestine	0	0	0	0	0	0	0	0	0	0	0	0	0	0	0	0	0	0	0	0	0	0	0	0	0	0	0	0	0	0	0	0	0	0	0	0	0	0	0	0	0
Panama	0	0	0	0	0	0	0	0	0	0	0	0	0	0	0	0	0	0	0	0	0	0	0	0	0	0	0	0	0	0	0	0	0	0	0	0	0	0	0	0	0
Papua New Guinea	0	0	0	0	0	0	0	0	0	0	0	0	0	0	0	0	0	0	0	0	0	0	0	0	0	0	0	0	0	0	0	0	0	0	0	0	0	0	0	0	0
Paraguay	0	0	0	0	0	0	0	0	0	0	0	0	0	0	0	0	0	0	0	0	0	0	0	0	0	0	0	0	0	0	0	0	0	0	0	0	0	0	0	0	0
Peru	0	0	0	0	0	0	0	0	0	0	0	0	0	0	0	0	0	0	0	0	0	0	0	0	0	0	0	0	0	0	0	0	0	0	0	0	0	0	0	0	0
Philippines	0	0	0	0	0	0	0	0	0	0	0	0	0	0	0	0	0	0	0	0	0	0	0	0	0	0	0	0	0	0	0	0	0	0	0	0	0	0	0	0	0
Poland	0	0	0	0	0	0	0	0	0	0	0	0	0	0	0	0	0	0	0	0	0	0	0	0	0	0	0	0	0	0	0	0	0	0	0	0	0	0	0	0	0
Portugal	0	0	0	0	0	0	0	0	0	0	0	0	0	0	0	0	0	0	0	0	0	0	0	0	0	0	0	0	0	0	0	0	0	0	0	0	0	0	0	0	0
Qatar	0	0	0	0	0	0	0	0	0	0	0	0	0	0	0	0	0	0	0	0	0	0	0	0	0	0	0	0	0	0	0	0	0	0	0	0	0	0	0	0	0
Romania	0	0	0	0	0	0	0	0	0	0	0	0	0	0	0	0	0	0	0	0	0	0	0	0	0	0	0	0	0	0	0	0	0	0	0	0	0	0	0	0	0
Russia	0	0	0	0	0	0	0	0	0	0	0	0	0	0	0	0	0	0	0	0	0	0	0	0	0	0	0	0	0	0	0	0	0	0	0	0	0	0	0	0	0
Rwanda	0	0	0	0	0	0	0	0	0	0	0	0	0	0	0	0	0	0	0	0	0	0	0	0	0	0	0	0	0	0	0	0	0	0	0	0	0	0	0	0	0
Saint Lucia	0	0	0	0	0	0	0	0	0	0	0	0	0	0	0	0	0	0	0	0	0	0	0	0	0	0	0	0	0	0	0	0	0	0	0	0	0	0	0	0	0
Saint Vincent and the Grenadines	0	0	0	0	0	0	0	0	0	0	0	0	0	0	0	0	0	0	0	0	0	0	0	0	0	0	0	0	0	0	0	0	0	0	0	0	0	0	0	0	0
Samoa	0	0	0	0	0	0	0	0	0	0	0	0	0	0	0	0	0	0	0	0	0	0	0	0	0	0	0	0	0	0	0	0	0	0	0	0	0	0	0	0	0
São Tomé and Príncipe	0	0	0	0	0	0	0	0	0	0	0	0	0	0	0	0	0	0	0	0	0	0	0	0	0	0	0	0	0	0	0	0	0	0	0	0	0	0	0	0	0
Saudi Arabia	0	0	0	0	0	0	0	0	0	0	0	0	0	0	0	0	0	0	0	0	0	0	0	0	0	0	0	0	0	0	0	0	0	0	0	0	0	0	0	0	0
Senegal	461.274	475.434	441.791	405.733	366.611	324.164	276.669	226.567	173.987	118.9	61.0394	0	0	0	0	0	0	0	0	0	0	0	0	0	0	0	0	0	0	0	0	0	0	0	0	0	0	0	0	0	0
Serbia	0	0	0	0	0	0	0	0	0	0	0	0	0	0	0	0	0	0	0	0	0	0	0	0	0	0	0	0	0	0	0	0	0	0	0	0	0	0	0	0	0
Seychelles	0	0	0	0	0	0	0	0	0	0	0	0	0	0	0	0	0	0	0	0	0	0	0	0	0	0	0	0	0	0	0	0	0	0	0	0	0	0	0	0	0
Sierra Leone	38553.5	38630	38490	38263.3	38101.1	38101.7	38098.2	38301.4	38773.2	39584.4	40754.3	42278.1	44281.6	46546.9	48814.8	50928.9	46287	41107.7	35512.2	29600.7	23404.6	20944.5	18371.6	15681.1	12863.7	9903.69	6759.99	3465.75	0	0	0	0	0	0	0	0	0	0	0	0	0
Singapore	0	0	0	0	0	0	0	0	0	0	0	0	0	0	0	0	0	0	0	0	0	0	0	0	0	0	0	0	0	0	0	0	0	0	0	0	0	0	0	0	0
Slovakia	0	0	0	0	0	0	0	0	0	0	0	0	0	0	0	0	0	0	0	0	0	0	0	0	0	0	0	0	0	0	0	0	0	0	0	0	0	0	0	0	0
Slovenia	0	0	0	0	0	0	0	0	0	0	0	0	0	0	0	0	0	0	0	0	0	0	0	0	0	0	0	0	0	0	0	0	0	0	0	0	0	0	0	0	0
Solomon Islands	0	0	0	0	0	0	0	0	0	0	0	0	0	0	0	0	0	0	0	0	0	0	0	0	0	0	0	0	0	0	0	0	0	0	0	0	0	0	0	0	0
Somalia	0	0	0	0	0	0	0	0	0	0	0	0	0	0	0	0	0	0	0	0	0	0	0	0	0	0	0	0	0	0	0	0	0	0	0	0	0	0	0	0	0
South Africa	0	0	0	0	0	0	0	0	0	0	0	0	0	0	0	0	0	0	0	0	0	0	0	0	0	0	0	0	0	0	0	0	0	0	0	0	0	0	0	0	0
South Korea	0	0	0	0	0	0	0	0	0	0	0	0	0	0	0	0	0	0	0	0	0	0	0	0	0	0	0	0	0	0	0	0	0	0	0	0	0	0	0	0	0
Spain	0	0	0	0	0	0	0	0	0	0	0	0	0	0	0	0	0	0	0	0	0	0	0	0	0	0	0	0	0	0	0	0	0	0	0	0	0	0	0	0	0
Sri Lanka	0	0	0	0	0	0	0	0	0	0	0	0	0	0	0	0	0	0	0	0	0	0	0	0	0	0	0	0	0	0	0	0	0	0	0	0	0	0	0	0	0
Sudan	162950	167991	173525	179434	185571	191838	197462	203323	209425	215782	222424	228950	235819	243065	250761	258937	266997	275694	284891	259608	232228	209545	185160	159056	131208	101515	69723.8	35933.1	0	0	0	0	0	0	0	0	0	0	0	0	0
Suriname	0	0	0	0	0	0	0	0	0	0	0	0	0	0	0	0	0	0	0	0	0	0	0	0	0	0	0	0	0	0	0	0	0	0	0	0	0	0	0	0	0
Swaziland	0	0	0	0	0	0	0	0	0	0	0	0	0	0	0	0	0	0	0	0	0	0	0	0	0	0	0	0	0	0	0	0	0	0	0	0	0	0	0	0	0
Sweden	0	0	0	0	0	0	0	0	0	0	0	0	0	0	0	0	0	0	0	0	0	0	0	0	0	0	0	0	0	0	0	0	0	0	0	0	0	0	0	0	0
Switzerland	0	0	0	0	0	0	0	0	0	0	0	0	0	0	0	0	0	0	0	0	0	0	0	0	0	0	0	0	0	0	0	0	0	0	0	0	0	0	0	0	0
Syria	0	0	0	0	0	0	0	0	0	0	0	0	0	0	0	0	0	0	0	0	0	0	0	0	0	0	0	0	0	0	0	0	0	0	0	0	0	0	0	0	0
Tajikistan	0	0	0	0	0	0	0	0	0	0	0	0	0	0	0	0	0	0	0	0	0	0	0	0	0	0	0	0	0	0	0	0	0	0	0	0	0	0	0	0	0
Tanzania	51580.6	53319.9	55240.6	57281.1	59363.1	61442	63226.5	65003.7	66807.4	65861.9	64850	63598.3	62275.3	60871.7	59375.3	57771.8	55979.6	54086.2	52067.2	49904.3	47583.1	43560.5	39297.9	34753.3	29890	24683.2	19105.9	13145.8	6785.52	0	0	0	0	0	0	0	0	0	0	0	0
Thailand	0	0	0	0	0	0	0	0	0	0	0	0	0	0	0	0	0	0	0	0	0	0	0	0	0	0	0	0	0	0	0	0	0	0	0	0	0	0	0	0	0
The Bahamas	0	0	0	0	0	0	0	0	0	0	0	0	0	0	0	0	0	0	0	0	0	0	0	0	0	0	0	0	0	0	0	0	0	0	0	0	0	0	0	0	0
The Gambia	0	0	0	0	0	0	0	0	0	0	0	0	0	0	0	0	0	0	0	0	0	0	0	0	0	0	0	0	0	0	0	0	0	0	0	0	0	0	0	0	0
Timor-Leste	0	0	0	0	0	0	0	0	0	0	0	0	0	0	0	0	0	0	0	0	0	0	0	0	0	0	0	0	0	0	0	0	0	0	0	0	0	0	0	0	0
Togo	8889.21	9076.43	8806.76	8526.98	8242.39	7955.44	7678.47	7392.68	7092.45	6771.51	6424.33	6038.76	5624.3	5177.09	4693.62	4171.02	3597.44	2985.95	2333.49	1637.39	895.562	806.649	711.813	610.786	503.335	389.049	266.796	137.356	0	0	0	0	0	0	0	0	0	0	0	0	0
Tonga	0	0	0	0	0	0	0	0	0	0	0	0	0	0	0	0	0	0	0	0	0	0	0	0	0	0	0	0	0	0	0	0	0	0	0	0	0	0	0	0	0
Trinidad and Tobago	0	0	0	0	0	0	0	0	0	0	0	0	0	0	0	0	0	0	0	0	0	0	0	0	0	0	0	0	0	0	0	0	0	0	0	0	0	0	0	0	0
Tunisia	0	0	0	0	0	0	0	0	0	0	0	0	0	0	0	0	0	0	0	0	0	0	0	0	0	0	0	0	0	0	0	0	0	0	0	0	0	0	0	0	0
Turkey	0	0	0	0	0	0	0	0	0	0	0	0	0	0	0	0	0	0	0	0	0	0	0	0	0	0	0	0	0	0	0	0	0	0	0	0	0	0	0	0	0
Turkmenistan	0	0	0	0	0	0	0	0	0	0	0	0	0	0	0	0	0	0	0	0	0	0	0	0	0	0	0	0	0	0	0	0	0	0	0	0	0	0	0	0	0
Uganda	38470.6	39614.8	40812.6	42063.7	43372.3	44744.6	45972.6	47292.1	48715.2	50253.2	49323.8	48281.6	47178.9	45988.9	44689.4	43260.2	41609.8	39824.9	37880.1	35750.3	33416.8	30808.7	27973.8	24890.8	21540.1	17900.2	13928.6	9637.8	5003.1	0	0	0	0	0	0	0	0	0	0	0	0
Ukraine	0	0	0	0	0	0	0	0	0	0	0	0	0	0	0	0	0	0	0	0	0	0	0	0	0	0	0	0	0	0	0	0	0	0	0	0	0	0	0	0	0
United Arab Emirates	0	0	0	0	0	0	0	0	0	0	0	0	0	0	0	0	0	0	0	0	0	0	0	0	0	0	0	0	0	0	0	0	0	0	0	0	0	0	0	0	0
United Kingdom	0	0	0	0	0	0	0	0	0	0	0	0	0	0	0	0	0	0	0	0	0	0	0	0	0	0	0	0	0	0	0	0	0	0	0	0	0	0	0	0	0
United States	0	0	0	0	0	0	0	0	0	0	0	0	0	0	0	0	0	0	0	0	0	0	0	0	0	0	0	0	0	0	0	0	0	0	0	0	0	0	0	0	0
Uruguay	0	0	0	0	0	0	0	0	0	0	0	0	0	0	0	0	0	0	0	0	0	0	0	0	0	0	0	0	0	0	0	0	0	0	0	0	0	0	0	0	0
Uzbekistan	0	0	0	0	0	0	0	0	0	0	0	0	0	0	0	0	0	0	0	0	0	0	0	0	0	0	0	0	0	0	0	0	0	0	0	0	0	0	0	0	0
Vanuatu	0	0	0	0	0	0	0	0	0	0	0	0	0	0	0	0	0	0	0	0	0	0	0	0	0	0	0	0	0	0	0	0	0	0	0	0	0	0	0	0	0
Venezuela	0	0	0	0	0	0	0	0	0	0	0	0	0	0	0	0	0	0	0	0	0	0	0	0	0	0	0	0	0	0	0	0	0	0	0	0	0	0	0	0	0
Vietnam	0	0	0	0	0	0	0	0	0	0	0	0	0	0	0	0	0	0	0	0	0	0	0	0	0	0	0	0	0	0	0	0	0	0	0	0	0	0	0	0	0
Yemen	0	0	0	0	0	0	0	0	0	0	0	0	0	0	0	0	0	0	0	0	0	0	0	0	0	0	0	0	0	0	0	0	0	0	0	0	0	0	0	0	0
Zambia	0	0	0	0	0	0	0	0	0	0	0	0	0	0	0	0	0	0	0	0	0	0	0	0	0	0	0	0	0	0	0	0	0	0	0	0	0	0	0	0	0
Zimbabwe	0	0	0	0	0	0	0	0	0	0	0	0	0	0	0	0	0	0	0	0	0	0	0	0	0	0	0	0	0	0	0	0	0	0	0	0	0	0	0	0	0
WOMEN
Afghanistan	0	0	0	0	0	0	0	0	0	0	0	0	0	0	0	0	0	0	0	0	0	0	0	0	0	0	0	0	0	0	0	0	0	0	0	0	0	0	0	0	0
Albania	0	0	0	0	0	0	0	0	0	0	0	0	0	0	0	0	0	0	0	0	0	0	0	0	0	0	0	0	0	0	0	0	0	0	0	0	0	0	0	0	0
Algeria	0	0	0	0	0	0	0	0	0	0	0	0	0	0	0	0	0	0	0	0	0	0	0	0	0	0	0	0	0	0	0	0	0	0	0	0	0	0	0	0	0
Angola	7851.77	8063.1	8313.58	8590.68	8878.78	9169.24	9406.23	9650.77	9912.5	10203	10528.1	10846.8	11207.8	11602.3	12019.8	12453.8	12278.6	12089.2	11882.1	11655.7	11408.3	10467.6	9469.45	8400.73	7249.2	6006.44	4659.82	3213.5	1662.53	0	0	0	0	0	0	0	0	0	0	0	0
Antigua and Barbuda	0	0	0	0	0	0	0	0	0	0	0	0	0	0	0	0	0	0	0	0	0	0	0	0	0	0	0	0	0	0	0	0	0	0	0	0	0	0	0	0	0
Argentina	0	0	0	0	0	0	0	0	0	0	0	0	0	0	0	0	0	0	0	0	0	0	0	0	0	0	0	0	0	0	0	0	0	0	0	0	0	0	0	0	0
Armenia	0	0	0	0	0	0	0	0	0	0	0	0	0	0	0	0	0	0	0	0	0	0	0	0	0	0	0	0	0	0	0	0	0	0	0	0	0	0	0	0	0
Australia	0	0	0	0	0	0	0	0	0	0	0	0	0	0	0	0	0	0	0	0	0	0	0	0	0	0	0	0	0	0	0	0	0	0	0	0	0	0	0	0	0
Austria	0	0	0	0	0	0	0	0	0	0	0	0	0	0	0	0	0	0	0	0	0	0	0	0	0	0	0	0	0	0	0	0	0	0	0	0	0	0	0	0	0
Azerbaijan	0	0	0	0	0	0	0	0	0	0	0	0	0	0	0	0	0	0	0	0	0	0	0	0	0	0	0	0	0	0	0	0	0	0	0	0	0	0	0	0	0
Bahrain	0	0	0	0	0	0	0	0	0	0	0	0	0	0	0	0	0	0	0	0	0	0	0	0	0	0	0	0	0	0	0	0	0	0	0	0	0	0	0	0	0
Bangladesh	0	0	0	0	0	0	0	0	0	0	0	0	0	0	0	0	0	0	0	0	0	0	0	0	0	0	0	0	0	0	0	0	0	0	0	0	0	0	0	0	0
Barbados	0	0	0	0	0	0	0	0	0	0	0	0	0	0	0	0	0	0	0	0	0	0	0	0	0	0	0	0	0	0	0	0	0	0	0	0	0	0	0	0	0
Belarus	0	0	0	0	0	0	0	0	0	0	0	0	0	0	0	0	0	0	0	0	0	0	0	0	0	0	0	0	0	0	0	0	0	0	0	0	0	0	0	0	0
Belgium	0	0	0	0	0	0	0	0	0	0	0	0	0	0	0	0	0	0	0	0	0	0	0	0	0	0	0	0	0	0	0	0	0	0	0	0	0	0	0	0	0
Belize	0	0	0	0	0	0	0	0	0	0	0	0	0	0	0	0	0	0	0	0	0	0	0	0	0	0	0	0	0	0	0	0	0	0	0	0	0	0	0	0	0
Benin	36193	37426.2	36938.1	36397.7	35757	34988.1	33909.8	32732.6	31466	30121.4	28699.8	27181.5	25565.7	23828.1	21946.6	19903.6	17637.7	15212.3	12611.9	9822.83	6833.41	6165.91	5451.07	4686.21	3868.65	2995	2058.42	1061.45	0	0	0	0	0	0	0	0	0	0	0	0	0
Bhutan	0	0	0	0	0	0	0	0	0	0	0	0	0	0	0	0	0	0	0	0	0	0	0	0	0	0	0	0	0	0	0	0	0	0	0	0	0	0	0	0	0
Bolivia	0	0	0	0	0	0	0	0	0	0	0	0	0	0	0	0	0	0	0	0	0	0	0	0	0	0	0	0	0	0	0	0	0	0	0	0	0	0	0	0	0
Bosnia and Herzegovina	0	0	0	0	0	0	0	0	0	0	0	0	0	0	0	0	0	0	0	0	0	0	0	0	0	0	0	0	0	0	0	0	0	0	0	0	0	0	0	0	0
Botswana	0	0	0	0	0	0	0	0	0	0	0	0	0	0	0	0	0	0	0	0	0	0	0	0	0	0	0	0	0	0	0	0	0	0	0	0	0	0	0	0	0
Brazil	0	0	0	0	0	0	0	0	0	0	0	0	0	0	0	0	0	0	0	0	0	0	0	0	0	0	0	0	0	0	0	0	0	0	0	0	0	0	0	0	0
Brunei	0	0	0	0	0	0	0	0	0	0	0	0	0	0	0	0	0	0	0	0	0	0	0	0	0	0	0	0	0	0	0	0	0	0	0	0	0	0	0	0	0
Bulgaria	0	0	0	0	0	0	0	0	0	0	0	0	0	0	0	0	0	0	0	0	0	0	0	0	0	0	0	0	0	0	0	0	0	0	0	0	0	0	0	0	0
Burkina Faso	43101.1	44141.9	40750.2	37207.6	33486.2	29555.6	25285.1	20801.8	16063.4	11034.2	5687.17	0	0	0	0	0	0	0	0	0	0	0	0	0	0	0	0	0	0	0	0	0	0	0	0	0	0	0	0	0	0
Burundi	20071.3	20349.1	20664.9	21006.3	21352.3	21694.5	21846.3	21993.8	22183.9	22477.5	22915.2	23784.2	24812.6	25972.3	27215.5	28500.4	27549	26449.3	25177.3	23719.9	22073.6	19963.6	17678.6	15210.7	12555.3	9710.98	6663.98	3430.37	0	0	0	0	0	0	0	0	0	0	0	0	0
Cambodia	0	0	0	0	0	0	0	0	0	0	0	0	0	0	0	0	0	0	0	0	0	0	0	0	0	0	0	0	0	0	0	0	0	0	0	0	0	0	0	0	0
Cameroon	139258	143043	147068	151330	155849	160636	165192	170052	175202	180610	178721	176076	173206	170091	166719	163063	158655	154027	149090	143759	137982	130070	121655	112688	103135	92953	81959.1	70293.6	57901.2	44727.3	30719.2	15802.1	0	0	0	0	0	0	0	0	0
Canada	0	0	0	0	0	0	0	0	0	0	0	0	0	0	0	0	0	0	0	0	0	0	0	0	0	0	0	0	0	0	0	0	0	0	0	0	0	0	0	0	0
Cape Verde	0	0	0	0	0	0	0	0	0	0	0	0	0	0	0	0	0	0	0	0	0	0	0	0	0	0	0	0	0	0	0	0	0	0	0	0	0	0	0	0	0
Central African Republic	46318.6	47326.8	48486.8	49763.4	51105	52473.6	53657	54851.9	56063.6	57307.2	56090	54461.8	52814.6	51138.5	49422.6	47666.3	45868.3	44038.2	42153.6	40194.4	38140.3	35824.8	33385.4	30812.1	28097.8	25231.1	22133.6	18896.3	15494.6	11909.4	8133.33	4160.41	0	0	0	0	0	0	0	0	0
Chad	25258.1	25902.2	26598.2	27349.3	28161.5	29038.4	29848.8	30745.8	31731.7	31367.3	30992.7	30504.5	30010.7	29472	28853.7	28137.4	27208.6	26186.3	25075.5	23881.3	22599.8	20415.3	18090.7	15599.3	12917.4	10028.9	6904.12	3567.01	0	0	0	0	0	0	0	0	0	0	0	0	0
Chile	0	0	0	0	0	0	0	0	0	0	0	0	0	0	0	0	0	0	0	0	0	0	0	0	0	0	0	0	0	0	0	0	0	0	0	0	0	0	0	0	0
China	0	0	0	0	0	0	0	0	0	0	0	0	0	0	0	0	0	0	0	0	0	0	0	0	0	0	0	0	0	0	0	0	0	0	0	0	0	0	0	0	0
Colombia	0	0	0	0	0	0	0	0	0	0	0	0	0	0	0	0	0	0	0	0	0	0	0	0	0	0	0	0	0	0	0	0	0	0	0	0	0	0	0	0	0
Comoros	0	0	0	0	0	0	0	0	0	0	0	0	0	0	0	0	0	0	0	0	0	0	0	0	0	0	0	0	0	0	0	0	0	0	0	0	0	0	0	0	0
Congo	5057.87	5206.37	5362.81	5527.32	5699.67	5879.44	6060.39	6249.16	6442.9	6638.64	6834.38	6996.13	6755.71	6502.55	6239.65	5968.11	5694.93	5408.09	5101.18	4768.61	4406.9	3953.2	3472.64	2965.48	2431.76	1870.55	1277.72	655.3	0	0	0	0	0	0	0	0	0	0	0	0	0
Costa Rica	0	0	0	0	0	0	0	0	0	0	0	0	0	0	0	0	0	0	0	0	0	0	0	0	0	0	0	0	0	0	0	0	0	0	0	0	0	0	0	0	0
Côte d’Ivoire	80507	83673.5	87028.7	90534.1	94127.1	97751.9	94272.8	90366.5	85998.6	81145.1	75798.6	69464.2	62809.4	55878	48700.8	41292	33661.1	25746.4	17526.2	8961.41	0	0	0	0	0	0	0	0	0	0	0	0	0	0	0	0	0	0	0	0	0
Croatia	0	0	0	0	0	0	0	0	0	0	0	0	0	0	0	0	0	0	0	0	0	0	0	0	0	0	0	0	0	0	0	0	0	0	0	0	0	0	0	0	0
Cuba	0	0	0	0	0	0	0	0	0	0	0	0	0	0	0	0	0	0	0	0	0	0	0	0	0	0	0	0	0	0	0	0	0	0	0	0	0	0	0	0	0
Cyprus	0	0	0	0	0	0	0	0	0	0	0	0	0	0	0	0	0	0	0	0	0	0	0	0	0	0	0	0	0	0	0	0	0	0	0	0	0	0	0	0	0
Czech Republic	0	0	0	0	0	0	0	0	0	0	0	0	0	0	0	0	0	0	0	0	0	0	0	0	0	0	0	0	0	0	0	0	0	0	0	0	0	0	0	0	0
Democratic Republic of the Congo	540148	557925	577753	598426	618697	637941	651552	664304	677273	691658	708223	725198	722883	721540	720541	719424	715221	711383	707501	703154	698080	682693	666439	649050	630325	610069	586372	561203	534270	505318	474124	439263	402246	362770	320564	275418	226649	174934	120050	61799.8	0
Denmark	0	0	0	0	0	0	0	0	0	0	0	0	0	0	0	0	0	0	0	0	0	0	0	0	0	0	0	0	0	0	0	0	0	0	0	0	0	0	0	0	0
Djibouti	0	0	0	0	0	0	0	0	0	0	0	0	0	0	0	0	0	0	0	0	0	0	0	0	0	0	0	0	0	0	0	0	0	0	0	0	0	0	0	0	0
Dominican Republic	0	0	0	0	0	0	0	0	0	0	0	0	0	0	0	0	0	0	0	0	0	0	0	0	0	0	0	0	0	0	0	0	0	0	0	0	0	0	0	0	0
Ecuador	0	0	0	0	0	0	0	0	0	0	0	0	0	0	0	0	0	0	0	0	0	0	0	0	0	0	0	0	0	0	0	0	0	0	0	0	0	0	0	0	0
Egypt	0	0	0	0	0	0	0	0	0	0	0	0	0	0	0	0	0	0	0	0	0	0	0	0	0	0	0	0	0	0	0	0	0	0	0	0	0	0	0	0	0
El Salvador	0	0	0	0	0	0	0	0	0	0	0	0	0	0	0	0	0	0	0	0	0	0	0	0	0	0	0	0	0	0	0	0	0	0	0	0	0	0	0	0	0
Equatorial Guinea	2607.5	2654.51	2707.88	2766.79	2831.15	2901.81	2978.07	3060.64	3152.59	3257.47	3271.56	3278.51	3292.83	3310.29	3325.21	3334.07	3322.46	3305.13	3281.75	3253.38	3219.81	3047.61	2863.75	2664.52	2446.74	2209.17	1947.92	1668.95	1372.07	1057.23	724.024	371.046	0	0	0	0	0	0	0	0	0
Eritrea	0	0	0	0	0	0	0	0	0	0	0	0	0	0	0	0	0	0	0	0	0	0	0	0	0	0	0	0	0	0	0	0	0	0	0	0	0	0	0	0	0
Estonia	0	0	0	0	0	0	0	0	0	0	0	0	0	0	0	0	0	0	0	0	0	0	0	0	0	0	0	0	0	0	0	0	0	0	0	0	0	0	0	0	0
Ethiopia	54555.6	56298.6	58232.8	60307.2	62449.4	64611.8	66417.9	68255.2	70149	72152.5	74302.6	76366.6	74719.5	72983.8	71096.3	69032.7	66797.7	64380	61776	58979.5	55969.2	53122.7	50023	46646	42965.6	38955	34550.8	29798	24664.5	19125.9	13171.2	6793.05	0	0	0	0	0	0	0	0	0
Federated States of Micronesia	0	0	0	0	0	0	0	0	0	0	0	0	0	0	0	0	0	0	0	0	0	0	0	0	0	0	0	0	0	0	0	0	0	0	0	0	0	0	0	0	0
Fiji	0	0	0	0	0	0	0	0	0	0	0	0	0	0	0	0	0	0	0	0	0	0	0	0	0	0	0	0	0	0	0	0	0	0	0	0	0	0	0	0	0
Finland	0	0	0	0	0	0	0	0	0	0	0	0	0	0	0	0	0	0	0	0	0	0	0	0	0	0	0	0	0	0	0	0	0	0	0	0	0	0	0	0	0
France	0	0	0	0	0	0	0	0	0	0	0	0	0	0	0	0	0	0	0	0	0	0	0	0	0	0	0	0	0	0	0	0	0	0	0	0	0	0	0	0	0
Gabon	0	0	0	0	0	0	0	0	0	0	0	0	0	0	0	0	0	0	0	0	0	0	0	0	0	0	0	0	0	0	0	0	0	0	0	0	0	0	0	0	0
Georgia	0	0	0	0	0	0	0	0	0	0	0	0	0	0	0	0	0	0	0	0	0	0	0	0	0	0	0	0	0	0	0	0	0	0	0	0	0	0	0	0	0
Germany	0	0	0	0	0	0	0	0	0	0	0	0	0	0	0	0	0	0	0	0	0	0	0	0	0	0	0	0	0	0	0	0	0	0	0	0	0	0	0	0	0
Ghana	60121.4	62106.8	60916.4	59587.2	58059.1	56300.5	54133.6	51780.4	49264.8	46606.5	43805.5	40802.8	37605.2	34190.6	30539.5	26625.7	22387	17865.8	13018.4	7815.43	2255.13	2123.09	1979.11	1824.57	1661.06	1489.19	1306.97	1115.65	914.505	702.797	480.013	245.581	0	0	0	0	0	0	0	0	0
Greece	0	0	0	0	0	0	0	0	0	0	0	0	0	0	0	0	0	0	0	0	0	0	0	0	0	0	0	0	0	0	0	0	0	0	0	0	0	0	0	0	0
Grenada	0	0	0	0	0	0	0	0	0	0	0	0	0	0	0	0	0	0	0	0	0	0	0	0	0	0	0	0	0	0	0	0	0	0	0	0	0	0	0	0	0
Guatemala	0	0	0	0	0	0	0	0	0	0	0	0	0	0	0	0	0	0	0	0	0	0	0	0	0	0	0	0	0	0	0	0	0	0	0	0	0	0	0	0	0
Guinea	28909.8	30344.6	32045.3	33855.6	35595.7	37162.4	35965.6	34452.8	32730.4	30901.9	29022.5	26975	24884.5	22753.2	20577.7	18343.2	15998.6	13572.9	11025.7	8324.52	5449.09	4905.5	4329.39	3716.31	3062.62	2365.87	1620.84	832.997	0	0	0	0	0	0	0	0	0	0	0	0	0
Guinea-Bissau	2879.2	2959.89	2729.78	2481.83	2223.58	1956.05	1666.37	1366.33	1052.19	720.599	370.094	0	0	0	0	0	0	0	0	0	0	0	0	0	0	0	0	0	0	0	0	0	0	0	0	0	0	0	0	0	0
Guyana	0	0	0	0	0	0	0	0	0	0	0	0	0	0	0	0	0	0	0	0	0	0	0	0	0	0	0	0	0	0	0	0	0	0	0	0	0	0	0	0	0
Haiti	0	0	0	0	0	0	0	0	0	0	0	0	0	0	0	0	0	0	0	0	0	0	0	0	0	0	0	0	0	0	0	0	0	0	0	0	0	0	0	0	0
Honduras	0	0	0	0	0	0	0	0	0	0	0	0	0	0	0	0	0	0	0	0	0	0	0	0	0	0	0	0	0	0	0	0	0	0	0	0	0	0	0	0	0
Hungary	0	0	0	0	0	0	0	0	0	0	0	0	0	0	0	0	0	0	0	0	0	0	0	0	0	0	0	0	0	0	0	0	0	0	0	0	0	0	0	0	0
Iceland	0	0	0	0	0	0	0	0	0	0	0	0	0	0	0	0	0	0	0	0	0	0	0	0	0	0	0	0	0	0	0	0	0	0	0	0	0	0	0	0	0
India	0	0	0	0	0	0	0	0	0	0	0	0	0	0	0	0	0	0	0	0	0	0	0	0	0	0	0	0	0	0	0	0	0	0	0	0	0	0	0	0	0
Indonesia	0	0	0	0	0	0	0	0	0	0	0	0	0	0	0	0	0	0	0	0	0	0	0	0	0	0	0	0	0	0	0	0	0	0	0	0	0	0	0	0	0
Iran	0	0	0	0	0	0	0	0	0	0	0	0	0	0	0	0	0	0	0	0	0	0	0	0	0	0	0	0	0	0	0	0	0	0	0	0	0	0	0	0	0
Iraq	0	0	0	0	0	0	0	0	0	0	0	0	0	0	0	0	0	0	0	0	0	0	0	0	0	0	0	0	0	0	0	0	0	0	0	0	0	0	0	0	0
Ireland	0	0	0	0	0	0	0	0	0	0	0	0	0	0	0	0	0	0	0	0	0	0	0	0	0	0	0	0	0	0	0	0	0	0	0	0	0	0	0	0	0
Israel	0	0	0	0	0	0	0	0	0	0	0	0	0	0	0	0	0	0	0	0	0	0	0	0	0	0	0	0	0	0	0	0	0	0	0	0	0	0	0	0	0
Italy	0	0	0	0	0	0	0	0	0	0	0	0	0	0	0	0	0	0	0	0	0	0	0	0	0	0	0	0	0	0	0	0	0	0	0	0	0	0	0	0	0
Jamaica	0	0	0	0	0	0	0	0	0	0	0	0	0	0	0	0	0	0	0	0	0	0	0	0	0	0	0	0	0	0	0	0	0	0	0	0	0	0	0	0	0
Japan	0	0	0	0	0	0	0	0	0	0	0	0	0	0	0	0	0	0	0	0	0	0	0	0	0	0	0	0	0	0	0	0	0	0	0	0	0	0	0	0	0
Jordan	0	0	0	0	0	0	0	0	0	0	0	0	0	0	0	0	0	0	0	0	0	0	0	0	0	0	0	0	0	0	0	0	0	0	0	0	0	0	0	0	0
Kazakhstan	0	0	0	0	0	0	0	0	0	0	0	0	0	0	0	0	0	0	0	0	0	0	0	0	0	0	0	0	0	0	0	0	0	0	0	0	0	0	0	0	0
Kenya	0	0	0	0	0	0	0	0	0	0	0	0	0	0	0	0	0	0	0	0	0	0	0	0	0	0	0	0	0	0	0	0	0	0	0	0	0	0	0	0	0
Kiribati	0	0	0	0	0	0	0	0	0	0	0	0	0	0	0	0	0	0	0	0	0	0	0	0	0	0	0	0	0	0	0	0	0	0	0	0	0	0	0	0	0
Kuwait	0	0	0	0	0	0	0	0	0	0	0	0	0	0	0	0	0	0	0	0	0	0	0	0	0	0	0	0	0	0	0	0	0	0	0	0	0	0	0	0	0
Kyrgyzstan	0	0	0	0	0	0	0	0	0	0	0	0	0	0	0	0	0	0	0	0	0	0	0	0	0	0	0	0	0	0	0	0	0	0	0	0	0	0	0	0	0
Laos	0	0	0	0	0	0	0	0	0	0	0	0	0	0	0	0	0	0	0	0	0	0	0	0	0	0	0	0	0	0	0	0	0	0	0	0	0	0	0	0	0
Latvia	0	0	0	0	0	0	0	0	0	0	0	0	0	0	0	0	0	0	0	0	0	0	0	0	0	0	0	0	0	0	0	0	0	0	0	0	0	0	0	0	0
Lebanon	0	0	0	0	0	0	0	0	0	0	0	0	0	0	0	0	0	0	0	0	0	0	0	0	0	0	0	0	0	0	0	0	0	0	0	0	0	0	0	0	0
Lesotho	0	0	0	0	0	0	0	0	0	0	0	0	0	0	0	0	0	0	0	0	0	0	0	0	0	0	0	0	0	0	0	0	0	0	0	0	0	0	0	0	0
Liberia	33227	32702.1	32251.2	32078.3	32425.5	33403.4	35375.4	38128.6	41253.7	44255.1	46830.3	48450.8	49571.8	50465.1	51479.2	52835	54601.2	52584.9	50439.4	47972	45096.8	41377.2	37279.7	32862.2	28166.3	23195.1	17902.7	12290.4	6330.94	0	0	0	0	0	0	0	0	0	0	0	0
Libya	0	0	0	0	0	0	0	0	0	0	0	0	0	0	0	0	0	0	0	0	0	0	0	0	0	0	0	0	0	0	0	0	0	0	0	0	0	0	0	0	0
Lithuania	0	0	0	0	0	0	0	0	0	0	0	0	0	0	0	0	0	0	0	0	0	0	0	0	0	0	0	0	0	0	0	0	0	0	0	0	0	0	0	0	0
Luxembourg	0	0	0	0	0	0	0	0	0	0	0	0	0	0	0	0	0	0	0	0	0	0	0	0	0	0	0	0	0	0	0	0	0	0	0	0	0	0	0	0	0
Macedonia	0	0	0	0	0	0	0	0	0	0	0	0	0	0	0	0	0	0	0	0	0	0	0	0	0	0	0	0	0	0	0	0	0	0	0	0	0	0	0	0	0
Madagascar	0	0	0	0	0	0	0	0	0	0	0	0	0	0	0	0	0	0	0	0	0	0	0	0	0	0	0	0	0	0	0	0	0	0	0	0	0	0	0	0	0
Malawi	14956.4	15251.5	15406.5	15491.2	15595	15774.2	15967.8	16272.6	15955.4	15633.7	15280.3	14872.7	14442.7	13998.1	13545.8	13084.6	12606.9	12101.3	11563.2	10989.7	10376.7	9333.13	8242.26	7085.34	5846.28	4519.41	3108.4	1600.91	0	0	0	0	0	0	0	0	0	0	0	0	0
Malaysia	0	0	0	0	0	0	0	0	0	0	0	0	0	0	0	0	0	0	0	0	0	0	0	0	0	0	0	0	0	0	0	0	0	0	0	0	0	0	0	0	0
Maldives	0	0	0	0	0	0	0	0	0	0	0	0	0	0	0	0	0	0	0	0	0	0	0	0	0	0	0	0	0	0	0	0	0	0	0	0	0	0	0	0	0
Mali	10346.4	10529.6	9682.19	8817.88	7917.89	6970.01	5943.88	4872.64	3749.54	2568.07	1320.89	0	0	0	0	0	0	0	0	0	0	0	0	0	0	0	0	0	0	0	0	0	0	0	0	0	0	0	0	0	0
Malta	0	0	0	0	0	0	0	0	0	0	0	0	0	0	0	0	0	0	0	0	0	0	0	0	0	0	0	0	0	0	0	0	0	0	0	0	0	0	0	0	0
Mauritania	0	0	0	0	0	0	0	0	0	0	0	0	0	0	0	0	0	0	0	0	0	0	0	0	0	0	0	0	0	0	0	0	0	0	0	0	0	0	0	0	0
Mauritius	0	0	0	0	0	0	0	0	0	0	0	0	0	0	0	0	0	0	0	0	0	0	0	0	0	0	0	0	0	0	0	0	0	0	0	0	0	0	0	0	0
Mexico	0	0	0	0	0	0	0	0	0	0	0	0	0	0	0	0	0	0	0	0	0	0	0	0	0	0	0	0	0	0	0	0	0	0	0	0	0	0	0	0	0
Moldova	0	0	0	0	0	0	0	0	0	0	0	0	0	0	0	0	0	0	0	0	0	0	0	0	0	0	0	0	0	0	0	0	0	0	0	0	0	0	0	0	0
Mongolia	0	0	0	0	0	0	0	0	0	0	0	0	0	0	0	0	0	0	0	0	0	0	0	0	0	0	0	0	0	0	0	0	0	0	0	0	0	0	0	0	0
Montenegro	0	0	0	0	0	0	0	0	0	0	0	0	0	0	0	0	0	0	0	0	0	0	0	0	0	0	0	0	0	0	0	0	0	0	0	0	0	0	0	0	0
Morocco	0	0	0	0	0	0	0	0	0	0	0	0	0	0	0	0	0	0	0	0	0	0	0	0	0	0	0	0	0	0	0	0	0	0	0	0	0	0	0	0	0
Mozambique	0	0	0	0	0	0	0	0	0	0	0	0	0	0	0	0	0	0	0	0	0	0	0	0	0	0	0	0	0	0	0	0	0	0	0	0	0	0	0	0	0
Myanmar	0	0	0	0	0	0	0	0	0	0	0	0	0	0	0	0	0	0	0	0	0	0	0	0	0	0	0	0	0	0	0	0	0	0	0	0	0	0	0	0	0
Namibia	0	0	0	0	0	0	0	0	0	0	0	0	0	0	0	0	0	0	0	0	0	0	0	0	0	0	0	0	0	0	0	0	0	0	0	0	0	0	0	0	0
Nepal	0	0	0	0	0	0	0	0	0	0	0	0	0	0	0	0	0	0	0	0	0	0	0	0	0	0	0	0	0	0	0	0	0	0	0	0	0	0	0	0	0
Netherlands	0	0	0	0	0	0	0	0	0	0	0	0	0	0	0	0	0	0	0	0	0	0	0	0	0	0	0	0	0	0	0	0	0	0	0	0	0	0	0	0	0
New Zealand	0	0	0	0	0	0	0	0	0	0	0	0	0	0	0	0	0	0	0	0	0	0	0	0	0	0	0	0	0	0	0	0	0	0	0	0	0	0	0	0	0
Nicaragua	0	0	0	0	0	0	0	0	0	0	0	0	0	0	0	0	0	0	0	0	0	0	0	0	0	0	0	0	0	0	0	0	0	0	0	0	0	0	0	0	0
Niger	1570.68	1615.06	1497.6	1373.67	1241.94	1101.1	943.506	777.789	601.96	414.462	214.146	0	0	0	0	0	0	0	0	0	0	0	0	0	0	0	0	0	0	0	0	0	0	0	0	0	0	0	0	0	0
Nigeria	395193	405328	416213	427813	440086	452975	464712	477227	490421	482236	473269	461670	449579	436854	423369	409023	392541	375383	357399	338451	318419	290093	260336	229026	196045	161231	124093	85009.8	43719.9	0	0	0	0	0	0	0	0	0	0	0	0
North Korea	0	0	0	0	0	0	0	0	0	0	0	0	0	0	0	0	0	0	0	0	0	0	0	0	0	0	0	0	0	0	0	0	0	0	0	0	0	0	0	0	0
Norway	0	0	0	0	0	0	0	0	0	0	0	0	0	0	0	0	0	0	0	0	0	0	0	0	0	0	0	0	0	0	0	0	0	0	0	0	0	0	0	0	0
Oman	0	0	0	0	0	0	0	0	0	0	0	0	0	0	0	0	0	0	0	0	0	0	0	0	0	0	0	0	0	0	0	0	0	0	0	0	0	0	0	0	0
Pakistan	0	0	0	0	0	0	0	0	0	0	0	0	0	0	0	0	0	0	0	0	0	0	0	0	0	0	0	0	0	0	0	0	0	0	0	0	0	0	0	0	0
Palestine	0	0	0	0	0	0	0	0	0	0	0	0	0	0	0	0	0	0	0	0	0	0	0	0	0	0	0	0	0	0	0	0	0	0	0	0	0	0	0	0	0
Panama	0	0	0	0	0	0	0	0	0	0	0	0	0	0	0	0	0	0	0	0	0	0	0	0	0	0	0	0	0	0	0	0	0	0	0	0	0	0	0	0	0
Papua New Guinea	0	0	0	0	0	0	0	0	0	0	0	0	0	0	0	0	0	0	0	0	0	0	0	0	0	0	0	0	0	0	0	0	0	0	0	0	0	0	0	0	0
Paraguay	0	0	0	0	0	0	0	0	0	0	0	0	0	0	0	0	0	0	0	0	0	0	0	0	0	0	0	0	0	0	0	0	0	0	0	0	0	0	0	0	0
Peru	0	0	0	0	0	0	0	0	0	0	0	0	0	0	0	0	0	0	0	0	0	0	0	0	0	0	0	0	0	0	0	0	0	0	0	0	0	0	0	0	0
Philippines	0	0	0	0	0	0	0	0	0	0	0	0	0	0	0	0	0	0	0	0	0	0	0	0	0	0	0	0	0	0	0	0	0	0	0	0	0	0	0	0	0
Poland	0	0	0	0	0	0	0	0	0	0	0	0	0	0	0	0	0	0	0	0	0	0	0	0	0	0	0	0	0	0	0	0	0	0	0	0	0	0	0	0	0
Portugal	0	0	0	0	0	0	0	0	0	0	0	0	0	0	0	0	0	0	0	0	0	0	0	0	0	0	0	0	0	0	0	0	0	0	0	0	0	0	0	0	0
Qatar	0	0	0	0	0	0	0	0	0	0	0	0	0	0	0	0	0	0	0	0	0	0	0	0	0	0	0	0	0	0	0	0	0	0	0	0	0	0	0	0	0
Romania	0	0	0	0	0	0	0	0	0	0	0	0	0	0	0	0	0	0	0	0	0	0	0	0	0	0	0	0	0	0	0	0	0	0	0	0	0	0	0	0	0
Russia	0	0	0	0	0	0	0	0	0	0	0	0	0	0	0	0	0	0	0	0	0	0	0	0	0	0	0	0	0	0	0	0	0	0	0	0	0	0	0	0	0
Rwanda	0	0	0	0	0	0	0	0	0	0	0	0	0	0	0	0	0	0	0	0	0	0	0	0	0	0	0	0	0	0	0	0	0	0	0	0	0	0	0	0	0
Saint Lucia	0	0	0	0	0	0	0	0	0	0	0	0	0	0	0	0	0	0	0	0	0	0	0	0	0	0	0	0	0	0	0	0	0	0	0	0	0	0	0	0	0
Saint Vincent and the Grenadines	0	0	0	0	0	0	0	0	0	0	0	0	0	0	0	0	0	0	0	0	0	0	0	0	0	0	0	0	0	0	0	0	0	0	0	0	0	0	0	0	0
Samoa	0	0	0	0	0	0	0	0	0	0	0	0	0	0	0	0	0	0	0	0	0	0	0	0	0	0	0	0	0	0	0	0	0	0	0	0	0	0	0	0	0
São Tomé and Príncipe	0	0	0	0	0	0	0	0	0	0	0	0	0	0	0	0	0	0	0	0	0	0	0	0	0	0	0	0	0	0	0	0	0	0	0	0	0	0	0	0	0
Saudi Arabia	0	0	0	0	0	0	0	0	0	0	0	0	0	0	0	0	0	0	0	0	0	0	0	0	0	0	0	0	0	0	0	0	0	0	0	0	0	0	0	0	0
Senegal	347.535	359.004	334.25	307.57	278.564	247.03	212.212	175.011	135.346	93.0905	48.0511	0	0	0	0	0	0	0	0	0	0	0	0	0	0	0	0	0	0	0	0	0	0	0	0	0	0	0	0	0	0
Serbia	0	0	0	0	0	0	0	0	0	0	0	0	0	0	0	0	0	0	0	0	0	0	0	0	0	0	0	0	0	0	0	0	0	0	0	0	0	0	0	0	0
Seychelles	0	0	0	0	0	0	0	0	0	0	0	0	0	0	0	0	0	0	0	0	0	0	0	0	0	0	0	0	0	0	0	0	0	0	0	0	0	0	0	0	0
Sierra Leone	31930.8	32031	31950.5	31795.9	31691.9	31719.4	31752.3	31954.2	32376.1	33074.6	34064.5	35349.6	37022	38901.1	40771.8	42503.4	38863.2	34792.2	30394.5	25758.1	20913.5	18695.8	16380.7	13964.6	11440	8794.38	5994.31	3068.68	0	0	0	0	0	0	0	0	0	0	0	0	0
Singapore	0	0	0	0	0	0	0	0	0	0	0	0	0	0	0	0	0	0	0	0	0	0	0	0	0	0	0	0	0	0	0	0	0	0	0	0	0	0	0	0	0
Slovakia	0	0	0	0	0	0	0	0	0	0	0	0	0	0	0	0	0	0	0	0	0	0	0	0	0	0	0	0	0	0	0	0	0	0	0	0	0	0	0	0	0
Slovenia	0	0	0	0	0	0	0	0	0	0	0	0	0	0	0	0	0	0	0	0	0	0	0	0	0	0	0	0	0	0	0	0	0	0	0	0	0	0	0	0	0
Solomon Islands	0	0	0	0	0	0	0	0	0	0	0	0	0	0	0	0	0	0	0	0	0	0	0	0	0	0	0	0	0	0	0	0	0	0	0	0	0	0	0	0	0
Somalia	0	0	0	0	0	0	0	0	0	0	0	0	0	0	0	0	0	0	0	0	0	0	0	0	0	0	0	0	0	0	0	0	0	0	0	0	0	0	0	0	0
South Africa	0	0	0	0	0	0	0	0	0	0	0	0	0	0	0	0	0	0	0	0	0	0	0	0	0	0	0	0	0	0	0	0	0	0	0	0	0	0	0	0	0
South Korea	0	0	0	0	0	0	0	0	0	0	0	0	0	0	0	0	0	0	0	0	0	0	0	0	0	0	0	0	0	0	0	0	0	0	0	0	0	0	0	0	0
Spain	0	0	0	0	0	0	0	0	0	0	0	0	0	0	0	0	0	0	0	0	0	0	0	0	0	0	0	0	0	0	0	0	0	0	0	0	0	0	0	0	0
Sri Lanka	0	0	0	0	0	0	0	0	0	0	0	0	0	0	0	0	0	0	0	0	0	0	0	0	0	0	0	0	0	0	0	0	0	0	0	0	0	0	0	0	0
Sudan	131630	135695	140143	144883	149804	154830	159416	164192	169163	174340	179743	185080	190695	196608	202868	209494	216030	223056	230466	208671	185093	167009	147567	126750	104539	80858.1	55525.5	28608.4	0	0	0	0	0	0	0	0	0	0	0	0	0
Suriname	0	0	0	0	0	0	0	0	0	0	0	0	0	0	0	0	0	0	0	0	0	0	0	0	0	0	0	0	0	0	0	0	0	0	0	0	0	0	0	0	0
Swaziland	0	0	0	0	0	0	0	0	0	0	0	0	0	0	0	0	0	0	0	0	0	0	0	0	0	0	0	0	0	0	0	0	0	0	0	0	0	0	0	0	0
Sweden	0	0	0	0	0	0	0	0	0	0	0	0	0	0	0	0	0	0	0	0	0	0	0	0	0	0	0	0	0	0	0	0	0	0	0	0	0	0	0	0	0
Switzerland	0	0	0	0	0	0	0	0	0	0	0	0	0	0	0	0	0	0	0	0	0	0	0	0	0	0	0	0	0	0	0	0	0	0	0	0	0	0	0	0	0
Syria	0	0	0	0	0	0	0	0	0	0	0	0	0	0	0	0	0	0	0	0	0	0	0	0	0	0	0	0	0	0	0	0	0	0	0	0	0	0	0	0	0
Tajikistan	0	0	0	0	0	0	0	0	0	0	0	0	0	0	0	0	0	0	0	0	0	0	0	0	0	0	0	0	0	0	0	0	0	0	0	0	0	0	0	0	0
Tanzania	43857.2	45298.9	46887	48566.5	50268.5	51953.9	53383.5	54793.9	56214	55310.9	54351.7	53196.6	51981.8	50702.5	49352.2	47921.2	46355.1	44713	42973.7	41121	39143.1	35801.5	32269.3	28512	24500.7	20215.6	15638.6	10754.1	5547.9	0	0	0	0	0	0	0	0	0	0	0	0
Thailand	0	0	0	0	0	0	0	0	0	0	0	0	0	0	0	0	0	0	0	0	0	0	0	0	0	0	0	0	0	0	0	0	0	0	0	0	0	0	0	0	0
The Bahamas	0	0	0	0	0	0	0	0	0	0	0	0	0	0	0	0	0	0	0	0	0	0	0	0	0	0	0	0	0	0	0	0	0	0	0	0	0	0	0	0	0
The Gambia	0	0	0	0	0	0	0	0	0	0	0	0	0	0	0	0	0	0	0	0	0	0	0	0	0	0	0	0	0	0	0	0	0	0	0	0	0	0	0	0	0
Timor-Leste	0	0	0	0	0	0	0	0	0	0	0	0	0	0	0	0	0	0	0	0	0	0	0	0	0	0	0	0	0	0	0	0	0	0	0	0	0	0	0	0	0
Togo	7129.11	7338.28	7185.49	7021.33	6842.92	6648.42	6429.61	6193.77	5939.4	5664.94	5368.14	5036.76	4681.8	4301.03	3892.24	3453.53	2976.3	2470.36	1933.34	1363.15	758.293	681.425	599.889	513.51	422.136	325.471	222.662	114.355	0	0	0	0	0	0	0	0	0	0	0	0	0
Tonga	0	0	0	0	0	0	0	0	0	0	0	0	0	0	0	0	0	0	0	0	0	0	0	0	0	0	0	0	0	0	0	0	0	0	0	0	0	0	0	0	0
Trinidad and Tobago	0	0	0	0	0	0	0	0	0	0	0	0	0	0	0	0	0	0	0	0	0	0	0	0	0	0	0	0	0	0	0	0	0	0	0	0	0	0	0	0	0
Tunisia	0	0	0	0	0	0	0	0	0	0	0	0	0	0	0	0	0	0	0	0	0	0	0	0	0	0	0	0	0	0	0	0	0	0	0	0	0	0	0	0	0
Turkey	0	0	0	0	0	0	0	0	0	0	0	0	0	0	0	0	0	0	0	0	0	0	0	0	0	0	0	0	0	0	0	0	0	0	0	0	0	0	0	0	0
Turkmenistan	0	0	0	0	0	0	0	0	0	0	0	0	0	0	0	0	0	0	0	0	0	0	0	0	0	0	0	0	0	0	0	0	0	0	0	0	0	0	0	0	0
Uganda	32635.7	33597.2	34600.3	35642.1	36723.4	37847.9	38824.7	39867.3	40988	42200	41362.1	40436.4	39467.9	38434.3	37316.4	36097.6	34715.5	33226.2	31610.8	29850.5	27930.6	25745.4	23373.5	20795.5	17993.9	14950.5	11632.6	8048.13	4177.27	0	0	0	0	0	0	0	0	0	0	0	0
Ukraine	0	0	0	0	0	0	0	0	0	0	0	0	0	0	0	0	0	0	0	0	0	0	0	0	0	0	0	0	0	0	0	0	0	0	0	0	0	0	0	0	0
United Arab Emirates	0	0	0	0	0	0	0	0	0	0	0	0	0	0	0	0	0	0	0	0	0	0	0	0	0	0	0	0	0	0	0	0	0	0	0	0	0	0	0	0	0
United Kingdom	0	0	0	0	0	0	0	0	0	0	0	0	0	0	0	0	0	0	0	0	0	0	0	0	0	0	0	0	0	0	0	0	0	0	0	0	0	0	0	0	0
United States	0	0	0	0	0	0	0	0	0	0	0	0	0	0	0	0	0	0	0	0	0	0	0	0	0	0	0	0	0	0	0	0	0	0	0	0	0	0	0	0	0
Uruguay	0	0	0	0	0	0	0	0	0	0	0	0	0	0	0	0	0	0	0	0	0	0	0	0	0	0	0	0	0	0	0	0	0	0	0	0	0	0	0	0	0
Uzbekistan	0	0	0	0	0	0	0	0	0	0	0	0	0	0	0	0	0	0	0	0	0	0	0	0	0	0	0	0	0	0	0	0	0	0	0	0	0	0	0	0	0
Vanuatu	0	0	0	0	0	0	0	0	0	0	0	0	0	0	0	0	0	0	0	0	0	0	0	0	0	0	0	0	0	0	0	0	0	0	0	0	0	0	0	0	0
Venezuela	0	0	0	0	0	0	0	0	0	0	0	0	0	0	0	0	0	0	0	0	0	0	0	0	0	0	0	0	0	0	0	0	0	0	0	0	0	0	0	0	0
Vietnam	0	0	0	0	0	0	0	0	0	0	0	0	0	0	0	0	0	0	0	0	0	0	0	0	0	0	0	0	0	0	0	0	0	0	0	0	0	0	0	0	0
Yemen	0	0	0	0	0	0	0	0	0	0	0	0	0	0	0	0	0	0	0	0	0	0	0	0	0	0	0	0	0	0	0	0	0	0	0	0	0	0	0	0	0
Zambia	0	0	0	0	0	0	0	0	0	0	0	0	0	0	0	0	0	0	0	0	0	0	0	0	0	0	0	0	0	0	0	0	0	0	0	0	0	0	0	0	0
Zimbabwe	0	0	0	0	0	0	0	0	0	0	0	0	0	0	0	0	0	0	0	0	0	0	0	0	0	0	0	0	0	0	0	0	0	0	0	0	0	0	0	0	0

## Sheet: TOTAL BURDEN 1990-2030
	1990	1991	1992	1993	1994	1995	1996	1997	1998	1999	2000	2001	2002	2003	2004	2005	2006	2007	2008	2009	2010	2011	2012	2013	2014	2015	2016	2017	2018	2019	2020	2021	2022	2023	2024	2025	2026	2027	2028	2029	2030
WORLD
Men	2.95081e+06	3.04063e+06	3.11853e+06	3.19933e+06	3.28035e+06	3.35971e+06	3.41242e+06	3.46484e+06	3.51673e+06	3.52626e+06	3.51506e+06	3.49904e+06	3.45401e+06	3.40686e+06	3.35614e+06	3.30048e+06	3.22379e+06	3.13637e+06	3.04311e+06	2.89461e+06	2.73382e+06	2.5763e+06	2.40796e+06	2.22786e+06	2.0352e+06	1.82903e+06	1.60698e+06	1.37146e+06	1.12123e+06	929851	839514	742101	639132	575205	507098	434505	356923	274961	188307	96714.5	0
Women	2.52831e+06	2.60412e+06	2.66805e+06	2.73416e+06	2.79996e+06	2.86379e+06	2.90536e+06	2.94591e+06	2.98551e+06	2.99091e+06	2.97821e+06	2.96247e+06	2.92268e+06	2.88109e+06	2.83639e+06	2.7874e+06	2.72175e+06	2.64736e+06	2.56792e+06	2.44145e+06	2.30471e+06	2.17313e+06	2.03271e+06	1.88268e+06	1.72234e+06	1.55094e+06	1.3669e+06	1.17171e+06	964410	805580	727663	643836	555210	499689	440525	377467	310143	238964	163675	84072.3	0
Total	5.47912e+06	5.64476e+06	5.78658e+06	5.93349e+06	6.08031e+06	6.2235e+06	6.31778e+06	6.41075e+06	6.50224e+06	6.51717e+06	6.49328e+06	6.46151e+06	6.37669e+06	6.28795e+06	6.19252e+06	6.08788e+06	5.94554e+06	5.78373e+06	5.61103e+06	5.33606e+06	5.03853e+06	4.74943e+06	4.44066e+06	4.11054e+06	3.75754e+06	3.37997e+06	2.97389e+06	2.54318e+06	2.08564e+06	1.73543e+06	1.56718e+06	1.38594e+06	1.19434e+06	1.07489e+06	947623	811973	667067	513925	351982	180787	0
MEN
Afghanistan	0	0	0	0	0	0	0	0	0	0	0	0	0	0	0	0	0	0	0	0	0	0	0	0	0	0	0	0	0	0	0	0	0	0	0	0	0	0	0	0	0
Albania	0	0	0	0	0	0	0	0	0	0	0	0	0	0	0	0	0	0	0	0	0	0	0	0	0	0	0	0	0	0	0	0	0	0	0	0	0	0	0	0	0
Algeria	0	0	0	0	0	0	0	0	0	0	0	0	0	0	0	0	0	0	0	0	0	0	0	0	0	0	0	0	0	0	0	0	0	0	0	0	0	0	0	0	0
Angola	13302.4	13683.7	14124.8	14604.4	15095	15578.5	16004.9	16442.1	16902.7	17401.8	17943.8	18511	19148.2	19838.7	20562.7	21305.6	21035.3	20737.1	20402.7	20026.6	19602.4	18011.7	16312.8	14483.1	12501.8	10355.1	8036.44	5541.11	2864.41	0	0	0	0	0	0	0	0	0	0	0	0
Antigua and Barbuda	0	0	0	0	0	0	0	0	0	0	0	0	0	0	0	0	0	0	0	0	0	0	0	0	0	0	0	0	0	0	0	0	0	0	0	0	0	0	0	0	0
Argentina	0	0	0	0	0	0	0	0	0	0	0	0	0	0	0	0	0	0	0	0	0	0	0	0	0	0	0	0	0	0	0	0	0	0	0	0	0	0	0	0	0
Armenia	0	0	0	0	0	0	0	0	0	0	0	0	0	0	0	0	0	0	0	0	0	0	0	0	0	0	0	0	0	0	0	0	0	0	0	0	0	0	0	0	0
Australia	0	0	0	0	0	0	0	0	0	0	0	0	0	0	0	0	0	0	0	0	0	0	0	0	0	0	0	0	0	0	0	0	0	0	0	0	0	0	0	0	0
Austria	0	0	0	0	0	0	0	0	0	0	0	0	0	0	0	0	0	0	0	0	0	0	0	0	0	0	0	0	0	0	0	0	0	0	0	0	0	0	0	0	0
Azerbaijan	0	0	0	0	0	0	0	0	0	0	0	0	0	0	0	0	0	0	0	0	0	0	0	0	0	0	0	0	0	0	0	0	0	0	0	0	0	0	0	0	0
Bahrain	0	0	0	0	0	0	0	0	0	0	0	0	0	0	0	0	0	0	0	0	0	0	0	0	0	0	0	0	0	0	0	0	0	0	0	0	0	0	0	0	0
Bangladesh	0	0	0	0	0	0	0	0	0	0	0	0	0	0	0	0	0	0	0	0	0	0	0	0	0	0	0	0	0	0	0	0	0	0	0	0	0	0	0	0	0
Barbados	0	0	0	0	0	0	0	0	0	0	0	0	0	0	0	0	0	0	0	0	0	0	0	0	0	0	0	0	0	0	0	0	0	0	0	0	0	0	0	0	0
Belarus	0	0	0	0	0	0	0	0	0	0	0	0	0	0	0	0	0	0	0	0	0	0	0	0	0	0	0	0	0	0	0	0	0	0	0	0	0	0	0	0	0
Belgium	0	0	0	0	0	0	0	0	0	0	0	0	0	0	0	0	0	0	0	0	0	0	0	0	0	0	0	0	0	0	0	0	0	0	0	0	0	0	0	0	0
Belize	0	0	0	0	0	0	0	0	0	0	0	0	0	0	0	0	0	0	0	0	0	0	0	0	0	0	0	0	0	0	0	0	0	0	0	0	0	0	0	0	0
Benin	55747.6	57963.6	57556.8	57052.2	56315.9	55268.9	53680.2	51862.6	49868	47753.4	45535	43245.4	40804.3	38151.5	35230	32001	28410.8	24527.6	20329.1	15798.1	10923.4	9860.03	8715.13	7486.46	6171.95	4768.8	3273.27	1684.94	0	0	0	0	0	0	0	0	0	0	0	0	0
Bhutan	0	0	0	0	0	0	0	0	0	0	0	0	0	0	0	0	0	0	0	0	0	0	0	0	0	0	0	0	0	0	0	0	0	0	0	0	0	0	0	0	0
Bolivia	0	0	0	0	0	0	0	0	0	0	0	0	0	0	0	0	0	0	0	0	0	0	0	0	0	0	0	0	0	0	0	0	0	0	0	0	0	0	0	0	0
Bosnia and Herzegovina	0	0	0	0	0	0	0	0	0	0	0	0	0	0	0	0	0	0	0	0	0	0	0	0	0	0	0	0	0	0	0	0	0	0	0	0	0	0	0	0	0
Botswana	0	0	0	0	0	0	0	0	0	0	0	0	0	0	0	0	0	0	0	0	0	0	0	0	0	0	0	0	0	0	0	0	0	0	0	0	0	0	0	0	0
Brazil	0	0	0	0	0	0	0	0	0	0	0	0	0	0	0	0	0	0	0	0	0	0	0	0	0	0	0	0	0	0	0	0	0	0	0	0	0	0	0	0	0
Brunei	0	0	0	0	0	0	0	0	0	0	0	0	0	0	0	0	0	0	0	0	0	0	0	0	0	0	0	0	0	0	0	0	0	0	0	0	0	0	0	0	0
Bulgaria	0	0	0	0	0	0	0	0	0	0	0	0	0	0	0	0	0	0	0	0	0	0	0	0	0	0	0	0	0	0	0	0	0	0	0	0	0	0	0	0	0
Burkina Faso	63428.1	65115.7	60208.7	55010.1	49485.8	43602.5	37313.5	30693.3	23690.4	16260.8	8370.89	0	0	0	0	0	0	0	0	0	0	0	0	0	0	0	0	0	0	0	0	0	0	0	0	0	0	0	0	0	0
Burundi	30952.1	31567.9	32186.4	32805	33418	34024	34603.6	35190.9	35832.9	36588.8	37492	38775.6	40233.8	41827.7	43494.6	45181.4	43299.3	41202.8	38879.5	36325.6	33536.2	30207.1	26678.2	22920.6	18910.5	14629.6	10054.9	5187	0	0	0	0	0	0	0	0	0	0	0	0	0
Cambodia	0	0	0	0	0	0	0	0	0	0	0	0	0	0	0	0	0	0	0	0	0	0	0	0	0	0	0	0	0	0	0	0	0	0	0	0	0	0	0	0	0
Cameroon	222011	228670	235651	242910	250417	258127	265716	273615	281789	290176	286454	281892	276835	271281	265242	258689	251222	243412	235117	226194	216538	204059	190784	176625	161512	145376	128078	109728	90256.4	69597.7	47696.9	24494.9	0	0	0	0	0	0	0	0	0
Canada	0	0	0	0	0	0	0	0	0	0	0	0	0	0	0	0	0	0	0	0	0	0	0	0	0	0	0	0	0	0	0	0	0	0	0	0	0	0	0	0	0
Cape Verde	0	0	0	0	0	0	0	0	0	0	0	0	0	0	0	0	0	0	0	0	0	0	0	0	0	0	0	0	0	0	0	0	0	0	0	0	0	0	0	0	0
Central African Republic	71917.3	73545.4	75391.5	77388.3	79435.2	81453.1	83343.1	85202.5	87035.4	88863.1	86883	84456	81998	79492.9	76921.2	74265.1	71544.3	68777.9	65913.7	62897.7	59687.9	55965.2	52030.6	47884	43529.2	38957.8	34092.2	29040	23763.4	18231.1	12428.4	6350.95	0	0	0	0	0	0	0	0	0
Chad	42480.7	43710.8	45010.5	46385.2	47842.5	49381.1	50904.3	52564.9	54366.2	53798.1	53176	52433.7	51657.9	50775.3	49717.9	48446.4	46844	45052.5	43077.1	40921.5	38577.5	34836.7	30841.4	26559.3	21960.7	17021.5	11712.5	6047.94	0	0	0	0	0	0	0	0	0	0	0	0	0
Chile	0	0	0	0	0	0	0	0	0	0	0	0	0	0	0	0	0	0	0	0	0	0	0	0	0	0	0	0	0	0	0	0	0	0	0	0	0	0	0	0	0
China	0	0	0	0	0	0	0	0	0	0	0	0	0	0	0	0	0	0	0	0	0	0	0	0	0	0	0	0	0	0	0	0	0	0	0	0	0	0	0	0	0
Colombia	0	0	0	0	0	0	0	0	0	0	0	0	0	0	0	0	0	0	0	0	0	0	0	0	0	0	0	0	0	0	0	0	0	0	0	0	0	0	0	0	0
Comoros	0	0	0	0	0	0	0	0	0	0	0	0	0	0	0	0	0	0	0	0	0	0	0	0	0	0	0	0	0	0	0	0	0	0	0	0	0	0	0	0	0
Congo	8889.22	9143.49	9405.92	9677.68	9959.36	10250.5	10550.5	10861.4	11178.9	11498.5	11816.9	12099	11690.4	11261.9	10817.1	10355.9	9889.03	9397.61	8870	8295.54	7667.87	6887.62	6057.13	5177.18	4248.35	3269.3	2235.1	1147.14	0	0	0	0	0	0	0	0	0	0	0	0	0
Costa Rica	0	0	0	0	0	0	0	0	0	0	0	0	0	0	0	0	0	0	0	0	0	0	0	0	0	0	0	0	0	0	0	0	0	0	0	0	0	0	0	0	0
Côte d’Ivoire	151318	156710	162256	167899	173554	179141	172069	164203	155487	145893	135444	123814	111634	98999.9	85991.9	72643.7	59070	45054.6	30566.1	15562.7	0	0	0	0	0	0	0	0	0	0	0	0	0	0	0	0	0	0	0	0	0
Croatia	0	0	0	0	0	0	0	0	0	0	0	0	0	0	0	0	0	0	0	0	0	0	0	0	0	0	0	0	0	0	0	0	0	0	0	0	0	0	0	0	0
Cuba	0	0	0	0	0	0	0	0	0	0	0	0	0	0	0	0	0	0	0	0	0	0	0	0	0	0	0	0	0	0	0	0	0	0	0	0	0	0	0	0	0
Cyprus	0	0	0	0	0	0	0	0	0	0	0	0	0	0	0	0	0	0	0	0	0	0	0	0	0	0	0	0	0	0	0	0	0	0	0	0	0	0	0	0	0
Czech Republic	0	0	0	0	0	0	0	0	0	0	0	0	0	0	0	0	0	0	0	0	0	0	0	0	0	0	0	0	0	0	0	0	0	0	0	0	0	0	0	0	0
Democratic Republic of the Congo	845619	876651	910908	946385	980943	1.01339e+06	1.03832e+06	1.06167e+06	1.08505e+06	1.11012e+06	1.13769e+06	1.16798e+06	1.16712e+06	1.167e+06	1.16641e+06	1.16443e+06	1.15878e+06	1.15318e+06	1.147e+06	1.13955e+06	1.13026e+06	1.10504e+06	1.07812e+06	1.04897e+06	1.01719e+06	982315	942959	901087	856252	808040	756075	699272	639132	575205	507098	434505	356923	274961	188307	96714.5	0
Denmark	0	0	0	0	0	0	0	0	0	0	0	0	0	0	0	0	0	0	0	0	0	0	0	0	0	0	0	0	0	0	0	0	0	0	0	0	0	0	0	0	0
Djibouti	0	0	0	0	0	0	0	0	0	0	0	0	0	0	0	0	0	0	0	0	0	0	0	0	0	0	0	0	0	0	0	0	0	0	0	0	0	0	0	0	0
Dominican Republic	0	0	0	0	0	0	0	0	0	0	0	0	0	0	0	0	0	0	0	0	0	0	0	0	0	0	0	0	0	0	0	0	0	0	0	0	0	0	0	0	0
Ecuador	0	0	0	0	0	0	0	0	0	0	0	0	0	0	0	0	0	0	0	0	0	0	0	0	0	0	0	0	0	0	0	0	0	0	0	0	0	0	0	0	0
Egypt	0	0	0	0	0	0	0	0	0	0	0	0	0	0	0	0	0	0	0	0	0	0	0	0	0	0	0	0	0	0	0	0	0	0	0	0	0	0	0	0	0
El Salvador	0	0	0	0	0	0	0	0	0	0	0	0	0	0	0	0	0	0	0	0	0	0	0	0	0	0	0	0	0	0	0	0	0	0	0	0	0	0	0	0	0
Equatorial Guinea	4138.08	4250.57	4384.15	4533.51	4691.65	4853.5	5026.11	5200.18	5378.73	5565.92	5585.07	5590.88	5596.46	5598.01	5589.7	5567.64	5521.3	5463.96	5396.32	5320.39	5236.3	4934.63	4617.84	4280.93	3919.19	3530.1	3111.53	2665.69	2191.82	1689.35	1157.29	593.879	0	0	0	0	0	0	0	0	0
Eritrea	0	0	0	0	0	0	0	0	0	0	0	0	0	0	0	0	0	0	0	0	0	0	0	0	0	0	0	0	0	0	0	0	0	0	0	0	0	0	0	0	0
Estonia	0	0	0	0	0	0	0	0	0	0	0	0	0	0	0	0	0	0	0	0	0	0	0	0	0	0	0	0	0	0	0	0	0	0	0	0	0	0	0	0	0
Ethiopia	90622.2	93675.5	96997	100516	104112	107672	110895	114111	117371	120783	124416	127993	125436	122766	119824	116516	112884	108869	104460	99657.8	94438.3	89381.6	83882.5	77920.6	71472.1	64512.3	56966.1	48910.9	40310.4	31135.4	21366.4	10986	0	0	0	0	0	0	0	0	0
Federated States of Micronesia	0	0	0	0	0	0	0	0	0	0	0	0	0	0	0	0	0	0	0	0	0	0	0	0	0	0	0	0	0	0	0	0	0	0	0	0	0	0	0	0	0
Fiji	0	0	0	0	0	0	0	0	0	0	0	0	0	0	0	0	0	0	0	0	0	0	0	0	0	0	0	0	0	0	0	0	0	0	0	0	0	0	0	0	0
Finland	0	0	0	0	0	0	0	0	0	0	0	0	0	0	0	0	0	0	0	0	0	0	0	0	0	0	0	0	0	0	0	0	0	0	0	0	0	0	0	0	0
France	0	0	0	0	0	0	0	0	0	0	0	0	0	0	0	0	0	0	0	0	0	0	0	0	0	0	0	0	0	0	0	0	0	0	0	0	0	0	0	0	0
Gabon	0	0	0	0	0	0	0	0	0	0	0	0	0	0	0	0	0	0	0	0	0	0	0	0	0	0	0	0	0	0	0	0	0	0	0	0	0	0	0	0	0
Georgia	0	0	0	0	0	0	0	0	0	0	0	0	0	0	0	0	0	0	0	0	0	0	0	0	0	0	0	0	0	0	0	0	0	0	0	0	0	0	0	0	0
Germany	0	0	0	0	0	0	0	0	0	0	0	0	0	0	0	0	0	0	0	0	0	0	0	0	0	0	0	0	0	0	0	0	0	0	0	0	0	0	0	0	0
Ghana	103336	106355	103858	101114	98079.1	94726.7	90926.9	86860.9	82510.2	77848.1	72853.9	67547.7	61887.1	55883	49546.8	42870.3	35792	28374	20575.6	12362.5	3714.71	3490.36	3253.61	3002.77	2736.59	2454.23	2155.68	1840.31	1507.77	1157.73	789.913	404.052	0	0	0	0	0	0	0	0	0
Greece	0	0	0	0	0	0	0	0	0	0	0	0	0	0	0	0	0	0	0	0	0	0	0	0	0	0	0	0	0	0	0	0	0	0	0	0	0	0	0	0	0
Grenada	0	0	0	0	0	0	0	0	0	0	0	0	0	0	0	0	0	0	0	0	0	0	0	0	0	0	0	0	0	0	0	0	0	0	0	0	0	0	0	0	0
Guatemala	0	0	0	0	0	0	0	0	0	0	0	0	0	0	0	0	0	0	0	0	0	0	0	0	0	0	0	0	0	0	0	0	0	0	0	0	0	0	0	0	0
Guinea	49803.7	52489.2	55636.4	58972.7	62178.1	65059.4	63156.7	60651.4	57729.2	54569.4	51265.1	47740.2	44092.9	40329	36444.9	32420.2	28255.7	23924.9	19366.1	14531.3	9395.29	8450.26	7447.72	6382.54	5250.55	4048.34	2773.08	1424.73	0	0	0	0	0	0	0	0	0	0	0	0	0
Guinea-Bissau	5027.17	5160.92	4760.66	4331.52	3880.09	3407.03	2899.9	2374.31	1825.15	1247.7	639.595	0	0	0	0	0	0	0	0	0	0	0	0	0	0	0	0	0	0	0	0	0	0	0	0	0	0	0	0	0	0
Guyana	0	0	0	0	0	0	0	0	0	0	0	0	0	0	0	0	0	0	0	0	0	0	0	0	0	0	0	0	0	0	0	0	0	0	0	0	0	0	0	0	0
Haiti	0	0	0	0	0	0	0	0	0	0	0	0	0	0	0	0	0	0	0	0	0	0	0	0	0	0	0	0	0	0	0	0	0	0	0	0	0	0	0	0	0
Honduras	0	0	0	0	0	0	0	0	0	0	0	0	0	0	0	0	0	0	0	0	0	0	0	0	0	0	0	0	0	0	0	0	0	0	0	0	0	0	0	0	0
Hungary	0	0	0	0	0	0	0	0	0	0	0	0	0	0	0	0	0	0	0	0	0	0	0	0	0	0	0	0	0	0	0	0	0	0	0	0	0	0	0	0	0
Iceland	0	0	0	0	0	0	0	0	0	0	0	0	0	0	0	0	0	0	0	0	0	0	0	0	0	0	0	0	0	0	0	0	0	0	0	0	0	0	0	0	0
India	0	0	0	0	0	0	0	0	0	0	0	0	0	0	0	0	0	0	0	0	0	0	0	0	0	0	0	0	0	0	0	0	0	0	0	0	0	0	0	0	0
Indonesia	0	0	0	0	0	0	0	0	0	0	0	0	0	0	0	0	0	0	0	0	0	0	0	0	0	0	0	0	0	0	0	0	0	0	0	0	0	0	0	0	0
Iran	0	0	0	0	0	0	0	0	0	0	0	0	0	0	0	0	0	0	0	0	0	0	0	0	0	0	0	0	0	0	0	0	0	0	0	0	0	0	0	0	0
Iraq	0	0	0	0	0	0	0	0	0	0	0	0	0	0	0	0	0	0	0	0	0	0	0	0	0	0	0	0	0	0	0	0	0	0	0	0	0	0	0	0	0
Ireland	0	0	0	0	0	0	0	0	0	0	0	0	0	0	0	0	0	0	0	0	0	0	0	0	0	0	0	0	0	0	0	0	0	0	0	0	0	0	0	0	0
Israel	0	0	0	0	0	0	0	0	0	0	0	0	0	0	0	0	0	0	0	0	0	0	0	0	0	0	0	0	0	0	0	0	0	0	0	0	0	0	0	0	0
Italy	0	0	0	0	0	0	0	0	0	0	0	0	0	0	0	0	0	0	0	0	0	0	0	0	0	0	0	0	0	0	0	0	0	0	0	0	0	0	0	0	0
Jamaica	0	0	0	0	0	0	0	0	0	0	0	0	0	0	0	0	0	0	0	0	0	0	0	0	0	0	0	0	0	0	0	0	0	0	0	0	0	0	0	0	0
Japan	0	0	0	0	0	0	0	0	0	0	0	0	0	0	0	0	0	0	0	0	0	0	0	0	0	0	0	0	0	0	0	0	0	0	0	0	0	0	0	0	0
Jordan	0	0	0	0	0	0	0	0	0	0	0	0	0	0	0	0	0	0	0	0	0	0	0	0	0	0	0	0	0	0	0	0	0	0	0	0	0	0	0	0	0
Kazakhstan	0	0	0	0	0	0	0	0	0	0	0	0	0	0	0	0	0	0	0	0	0	0	0	0	0	0	0	0	0	0	0	0	0	0	0	0	0	0	0	0	0
Kenya	0	0	0	0	0	0	0	0	0	0	0	0	0	0	0	0	0	0	0	0	0	0	0	0	0	0	0	0	0	0	0	0	0	0	0	0	0	0	0	0	0
Kiribati	0	0	0	0	0	0	0	0	0	0	0	0	0	0	0	0	0	0	0	0	0	0	0	0	0	0	0	0	0	0	0	0	0	0	0	0	0	0	0	0	0
Kuwait	0	0	0	0	0	0	0	0	0	0	0	0	0	0	0	0	0	0	0	0	0	0	0	0	0	0	0	0	0	0	0	0	0	0	0	0	0	0	0	0	0
Kyrgyzstan	0	0	0	0	0	0	0	0	0	0	0	0	0	0	0	0	0	0	0	0	0	0	0	0	0	0	0	0	0	0	0	0	0	0	0	0	0	0	0	0	0
Laos	0	0	0	0	0	0	0	0	0	0	0	0	0	0	0	0	0	0	0	0	0	0	0	0	0	0	0	0	0	0	0	0	0	0	0	0	0	0	0	0	0
Latvia	0	0	0	0	0	0	0	0	0	0	0	0	0	0	0	0	0	0	0	0	0	0	0	0	0	0	0	0	0	0	0	0	0	0	0	0	0	0	0	0	0
Lebanon	0	0	0	0	0	0	0	0	0	0	0	0	0	0	0	0	0	0	0	0	0	0	0	0	0	0	0	0	0	0	0	0	0	0	0	0	0	0	0	0	0
Lesotho	0	0	0	0	0	0	0	0	0	0	0	0	0	0	0	0	0	0	0	0	0	0	0	0	0	0	0	0	0	0	0	0	0	0	0	0	0	0	0	0	0
Liberia	56530	55668.6	54901.3	54576.5	55100.6	56642.7	59967.9	64617.2	69889.6	74947.9	79290.1	82041.9	83963.5	85528	87335.5	89749.1	93011.8	89631.6	85982.9	81688.7	76585.5	70379.3	63456.8	55939.5	47922.7	39429.1	30416.9	20861	10730.9	0	0	0	0	0	0	0	0	0	0	0	0
Libya	0	0	0	0	0	0	0	0	0	0	0	0	0	0	0	0	0	0	0	0	0	0	0	0	0	0	0	0	0	0	0	0	0	0	0	0	0	0	0	0	0
Lithuania	0	0	0	0	0	0	0	0	0	0	0	0	0	0	0	0	0	0	0	0	0	0	0	0	0	0	0	0	0	0	0	0	0	0	0	0	0	0	0	0	0
Luxembourg	0	0	0	0	0	0	0	0	0	0	0	0	0	0	0	0	0	0	0	0	0	0	0	0	0	0	0	0	0	0	0	0	0	0	0	0	0	0	0	0	0
Macedonia	0	0	0	0	0	0	0	0	0	0	0	0	0	0	0	0	0	0	0	0	0	0	0	0	0	0	0	0	0	0	0	0	0	0	0	0	0	0	0	0	0
Madagascar	0	0	0	0	0	0	0	0	0	0	0	0	0	0	0	0	0	0	0	0	0	0	0	0	0	0	0	0	0	0	0	0	0	0	0	0	0	0	0	0	0
Malawi	24604.3	25198.4	25520.7	25701.6	25912.2	26261.3	26700.3	27356.9	26986.4	26594.9	26122.4	25575.3	24967.3	24307.9	23606.3	22861.4	22079.3	21228.7	20311.6	19334.1	18294.1	16487.2	14599.5	12588.9	10418.5	8073.42	5567.27	2872.51	0	0	0	0	0	0	0	0	0	0	0	0	0
Malaysia	0	0	0	0	0	0	0	0	0	0	0	0	0	0	0	0	0	0	0	0	0	0	0	0	0	0	0	0	0	0	0	0	0	0	0	0	0	0	0	0	0
Maldives	0	0	0	0	0	0	0	0	0	0	0	0	0	0	0	0	0	0	0	0	0	0	0	0	0	0	0	0	0	0	0	0	0	0	0	0	0	0	0	0	0
Mali	15710.9	16026.3	14774.6	13486.8	12126.8	10673.1	9115.64	7481.15	5760.8	3946.57	2029.11	0	0	0	0	0	0	0	0	0	0	0	0	0	0	0	0	0	0	0	0	0	0	0	0	0	0	0	0	0	0
Malta	0	0	0	0	0	0	0	0	0	0	0	0	0	0	0	0	0	0	0	0	0	0	0	0	0	0	0	0	0	0	0	0	0	0	0	0	0	0	0	0	0
Mauritania	0	0	0	0	0	0	0	0	0	0	0	0	0	0	0	0	0	0	0	0	0	0	0	0	0	0	0	0	0	0	0	0	0	0	0	0	0	0	0	0	0
Mauritius	0	0	0	0	0	0	0	0	0	0	0	0	0	0	0	0	0	0	0	0	0	0	0	0	0	0	0	0	0	0	0	0	0	0	0	0	0	0	0	0	0
Mexico	0	0	0	0	0	0	0	0	0	0	0	0	0	0	0	0	0	0	0	0	0	0	0	0	0	0	0	0	0	0	0	0	0	0	0	0	0	0	0	0	0
Moldova	0	0	0	0	0	0	0	0	0	0	0	0	0	0	0	0	0	0	0	0	0	0	0	0	0	0	0	0	0	0	0	0	0	0	0	0	0	0	0	0	0
Mongolia	0	0	0	0	0	0	0	0	0	0	0	0	0	0	0	0	0	0	0	0	0	0	0	0	0	0	0	0	0	0	0	0	0	0	0	0	0	0	0	0	0
Montenegro	0	0	0	0	0	0	0	0	0	0	0	0	0	0	0	0	0	0	0	0	0	0	0	0	0	0	0	0	0	0	0	0	0	0	0	0	0	0	0	0	0
Morocco	0	0	0	0	0	0	0	0	0	0	0	0	0	0	0	0	0	0	0	0	0	0	0	0	0	0	0	0	0	0	0	0	0	0	0	0	0	0	0	0	0
Mozambique	0	0	0	0	0	0	0	0	0	0	0	0	0	0	0	0	0	0	0	0	0	0	0	0	0	0	0	0	0	0	0	0	0	0	0	0	0	0	0	0	0
Myanmar	0	0	0	0	0	0	0	0	0	0	0	0	0	0	0	0	0	0	0	0	0	0	0	0	0	0	0	0	0	0	0	0	0	0	0	0	0	0	0	0	0
Namibia	0	0	0	0	0	0	0	0	0	0	0	0	0	0	0	0	0	0	0	0	0	0	0	0	0	0	0	0	0	0	0	0	0	0	0	0	0	0	0	0	0
Nepal	0	0	0	0	0	0	0	0	0	0	0	0	0	0	0	0	0	0	0	0	0	0	0	0	0	0	0	0	0	0	0	0	0	0	0	0	0	0	0	0	0
Netherlands	0	0	0	0	0	0	0	0	0	0	0	0	0	0	0	0	0	0	0	0	0	0	0	0	0	0	0	0	0	0	0	0	0	0	0	0	0	0	0	0	0
New Zealand	0	0	0	0	0	0	0	0	0	0	0	0	0	0	0	0	0	0	0	0	0	0	0	0	0	0	0	0	0	0	0	0	0	0	0	0	0	0	0	0	0
Nicaragua	0	0	0	0	0	0	0	0	0	0	0	0	0	0	0	0	0	0	0	0	0	0	0	0	0	0	0	0	0	0	0	0	0	0	0	0	0	0	0	0	0
Niger	2370.93	2446.34	2279.32	2101.88	1909.68	1699.29	1467.48	1219.6	951.511	660.019	343.087	0	0	0	0	0	0	0	0	0	0	0	0	0	0	0	0	0	0	0	0	0	0	0	0	0	0	0	0	0	0
Nigeria	681981	700273	719274	738926	759156	779807	799830	820886	842795	827839	811253	791919	771687	750271	727427	702914	676329	648481	618998	587532	553810	505924	455077	401065	343722	282842	218114	149636	77028.3	0	0	0	0	0	0	0	0	0	0	0	0
North Korea	0	0	0	0	0	0	0	0	0	0	0	0	0	0	0	0	0	0	0	0	0	0	0	0	0	0	0	0	0	0	0	0	0	0	0	0	0	0	0	0	0
Norway	0	0	0	0	0	0	0	0	0	0	0	0	0	0	0	0	0	0	0	0	0	0	0	0	0	0	0	0	0	0	0	0	0	0	0	0	0	0	0	0	0
Oman	0	0	0	0	0	0	0	0	0	0	0	0	0	0	0	0	0	0	0	0	0	0	0	0	0	0	0	0	0	0	0	0	0	0	0	0	0	0	0	0	0
Pakistan	0	0	0	0	0	0	0	0	0	0	0	0	0	0	0	0	0	0	0	0	0	0	0	0	0	0	0	0	0	0	0	0	0	0	0	0	0	0	0	0	0
Palestine	0	0	0	0	0	0	0	0	0	0	0	0	0	0	0	0	0	0	0	0	0	0	0	0	0	0	0	0	0	0	0	0	0	0	0	0	0	0	0	0	0
Panama	0	0	0	0	0	0	0	0	0	0	0	0	0	0	0	0	0	0	0	0	0	0	0	0	0	0	0	0	0	0	0	0	0	0	0	0	0	0	0	0	0
Papua New Guinea	0	0	0	0	0	0	0	0	0	0	0	0	0	0	0	0	0	0	0	0	0	0	0	0	0	0	0	0	0	0	0	0	0	0	0	0	0	0	0	0	0
Paraguay	0	0	0	0	0	0	0	0	0	0	0	0	0	0	0	0	0	0	0	0	0	0	0	0	0	0	0	0	0	0	0	0	0	0	0	0	0	0	0	0	0
Peru	0	0	0	0	0	0	0	0	0	0	0	0	0	0	0	0	0	0	0	0	0	0	0	0	0	0	0	0	0	0	0	0	0	0	0	0	0	0	0	0	0
Philippines	0	0	0	0	0	0	0	0	0	0	0	0	0	0	0	0	0	0	0	0	0	0	0	0	0	0	0	0	0	0	0	0	0	0	0	0	0	0	0	0	0
Poland	0	0	0	0	0	0	0	0	0	0	0	0	0	0	0	0	0	0	0	0	0	0	0	0	0	0	0	0	0	0	0	0	0	0	0	0	0	0	0	0	0
Portugal	0	0	0	0	0	0	0	0	0	0	0	0	0	0	0	0	0	0	0	0	0	0	0	0	0	0	0	0	0	0	0	0	0	0	0	0	0	0	0	0	0
Qatar	0	0	0	0	0	0	0	0	0	0	0	0	0	0	0	0	0	0	0	0	0	0	0	0	0	0	0	0	0	0	0	0	0	0	0	0	0	0	0	0	0
Romania	0	0	0	0	0	0	0	0	0	0	0	0	0	0	0	0	0	0	0	0	0	0	0	0	0	0	0	0	0	0	0	0	0	0	0	0	0	0	0	0	0
Russia	0	0	0	0	0	0	0	0	0	0	0	0	0	0	0	0	0	0	0	0	0	0	0	0	0	0	0	0	0	0	0	0	0	0	0	0	0	0	0	0	0
Rwanda	0	0	0	0	0	0	0	0	0	0	0	0	0	0	0	0	0	0	0	0	0	0	0	0	0	0	0	0	0	0	0	0	0	0	0	0	0	0	0	0	0
Saint Lucia	0	0	0	0	0	0	0	0	0	0	0	0	0	0	0	0	0	0	0	0	0	0	0	0	0	0	0	0	0	0	0	0	0	0	0	0	0	0	0	0	0
Saint Vincent and the Grenadines	0	0	0	0	0	0	0	0	0	0	0	0	0	0	0	0	0	0	0	0	0	0	0	0	0	0	0	0	0	0	0	0	0	0	0	0	0	0	0	0	0
Samoa	0	0	0	0	0	0	0	0	0	0	0	0	0	0	0	0	0	0	0	0	0	0	0	0	0	0	0	0	0	0	0	0	0	0	0	0	0	0	0	0	0
São Tomé and Príncipe	0	0	0	0	0	0	0	0	0	0	0	0	0	0	0	0	0	0	0	0	0	0	0	0	0	0	0	0	0	0	0	0	0	0	0	0	0	0	0	0	0
Saudi Arabia	0	0	0	0	0	0	0	0	0	0	0	0	0	0	0	0	0	0	0	0	0	0	0	0	0	0	0	0	0	0	0	0	0	0	0	0	0	0	0	0	0
Senegal	641.475	661.365	614.442	563.909	508.95	449.24	383.737	314.424	241.479	164.927	84.543	0	0	0	0	0	0	0	0	0	0	0	0	0	0	0	0	0	0	0	0	0	0	0	0	0	0	0	0	0	0
Serbia	0	0	0	0	0	0	0	0	0	0	0	0	0	0	0	0	0	0	0	0	0	0	0	0	0	0	0	0	0	0	0	0	0	0	0	0	0	0	0	0	0
Seychelles	0	0	0	0	0	0	0	0	0	0	0	0	0	0	0	0	0	0	0	0	0	0	0	0	0	0	0	0	0	0	0	0	0	0	0	0	0	0	0	0	0
Sierra Leone	51287.1	51430.1	51225.3	50838.4	50463.5	50219.7	50137.1	50285.8	50746.7	51611.8	52901	54815.5	57353.3	60230.7	63111.2	65783.9	60178.5	53885.7	47043.8	39771.3	32109.6	28747.3	25204.6	21480.5	17572.6	13475.2	9170.85	4684.45	0	0	0	0	0	0	0	0	0	0	0	0	0
Singapore	0	0	0	0	0	0	0	0	0	0	0	0	0	0	0	0	0	0	0	0	0	0	0	0	0	0	0	0	0	0	0	0	0	0	0	0	0	0	0	0	0
Slovakia	0	0	0	0	0	0	0	0	0	0	0	0	0	0	0	0	0	0	0	0	0	0	0	0	0	0	0	0	0	0	0	0	0	0	0	0	0	0	0	0	0
Slovenia	0	0	0	0	0	0	0	0	0	0	0	0	0	0	0	0	0	0	0	0	0	0	0	0	0	0	0	0	0	0	0	0	0	0	0	0	0	0	0	0	0
Solomon Islands	0	0	0	0	0	0	0	0	0	0	0	0	0	0	0	0	0	0	0	0	0	0	0	0	0	0	0	0	0	0	0	0	0	0	0	0	0	0	0	0	0
Somalia	0	0	0	0	0	0	0	0	0	0	0	0	0	0	0	0	0	0	0	0	0	0	0	0	0	0	0	0	0	0	0	0	0	0	0	0	0	0	0	0	0
South Africa	0	0	0	0	0	0	0	0	0	0	0	0	0	0	0	0	0	0	0	0	0	0	0	0	0	0	0	0	0	0	0	0	0	0	0	0	0	0	0	0	0
South Korea	0	0	0	0	0	0	0	0	0	0	0	0	0	0	0	0	0	0	0	0	0	0	0	0	0	0	0	0	0	0	0	0	0	0	0	0	0	0	0	0	0
Spain	0	0	0	0	0	0	0	0	0	0	0	0	0	0	0	0	0	0	0	0	0	0	0	0	0	0	0	0	0	0	0	0	0	0	0	0	0	0	0	0	0
Sri Lanka	0	0	0	0	0	0	0	0	0	0	0	0	0	0	0	0	0	0	0	0	0	0	0	0	0	0	0	0	0	0	0	0	0	0	0	0	0	0	0	0	0
Sudan	222108	228805	236082	243769	251665	259624	267048	274785	282842	291219	299906	308771	318071	327807	338020	348696	359437	370913	382935	347829	309875	279342	246532	211444	174074	134346	92073.5	47333.7	0	0	0	0	0	0	0	0	0	0	0	0	0
Suriname	0	0	0	0	0	0	0	0	0	0	0	0	0	0	0	0	0	0	0	0	0	0	0	0	0	0	0	0	0	0	0	0	0	0	0	0	0	0	0	0	0
Swaziland	0	0	0	0	0	0	0	0	0	0	0	0	0	0	0	0	0	0	0	0	0	0	0	0	0	0	0	0	0	0	0	0	0	0	0	0	0	0	0	0	0
Sweden	0	0	0	0	0	0	0	0	0	0	0	0	0	0	0	0	0	0	0	0	0	0	0	0	0	0	0	0	0	0	0	0	0	0	0	0	0	0	0	0	0
Switzerland	0	0	0	0	0	0	0	0	0	0	0	0	0	0	0	0	0	0	0	0	0	0	0	0	0	0	0	0	0	0	0	0	0	0	0	0	0	0	0	0	0
Syria	0	0	0	0	0	0	0	0	0	0	0	0	0	0	0	0	0	0	0	0	0	0	0	0	0	0	0	0	0	0	0	0	0	0	0	0	0	0	0	0	0
Tajikistan	0	0	0	0	0	0	0	0	0	0	0	0	0	0	0	0	0	0	0	0	0	0	0	0	0	0	0	0	0	0	0	0	0	0	0	0	0	0	0	0	0
Tanzania	70947.8	73360.3	75990.5	78749.7	81525.5	84244.5	86703.9	89123.7	91542.4	90164.7	88652.7	86921.8	85078.7	83117	81027.2	78791.8	76364.1	73816.4	71114.3	68229.5	65133.5	59701.1	53934.9	47763.6	41125.4	33982.3	26322.8	18114.7	9346.21	0	0	0	0	0	0	0	0	0	0	0	0
Thailand	0	0	0	0	0	0	0	0	0	0	0	0	0	0	0	0	0	0	0	0	0	0	0	0	0	0	0	0	0	0	0	0	0	0	0	0	0	0	0	0	0
The Bahamas	0	0	0	0	0	0	0	0	0	0	0	0	0	0	0	0	0	0	0	0	0	0	0	0	0	0	0	0	0	0	0	0	0	0	0	0	0	0	0	0	0
The Gambia	0	0	0	0	0	0	0	0	0	0	0	0	0	0	0	0	0	0	0	0	0	0	0	0	0	0	0	0	0	0	0	0	0	0	0	0	0	0	0	0	0
Timor-Leste	0	0	0	0	0	0	0	0	0	0	0	0	0	0	0	0	0	0	0	0	0	0	0	0	0	0	0	0	0	0	0	0	0	0	0	0	0	0	0	0	0
Togo	12317	12609.4	12263.2	11894.1	11508.2	11107.5	10705.2	10285.2	9840.55	9363.63	8848.31	8291.77	7697.15	7061.06	6380.55	5652.81	4871.88	4044.63	3166.65	2234.21	1244.64	1120.21	987.635	846.492	696.496	537.249	368.181	189.354	0	0	0	0	0	0	0	0	0	0	0	0	0
Tonga	0	0	0	0	0	0	0	0	0	0	0	0	0	0	0	0	0	0	0	0	0	0	0	0	0	0	0	0	0	0	0	0	0	0	0	0	0	0	0	0	0
Trinidad and Tobago	0	0	0	0	0	0	0	0	0	0	0	0	0	0	0	0	0	0	0	0	0	0	0	0	0	0	0	0	0	0	0	0	0	0	0	0	0	0	0	0	0
Tunisia	0	0	0	0	0	0	0	0	0	0	0	0	0	0	0	0	0	0	0	0	0	0	0	0	0	0	0	0	0	0	0	0	0	0	0	0	0	0	0	0	0
Turkey	0	0	0	0	0	0	0	0	0	0	0	0	0	0	0	0	0	0	0	0	0	0	0	0	0	0	0	0	0	0	0	0	0	0	0	0	0	0	0	0	0
Turkmenistan	0	0	0	0	0	0	0	0	0	0	0	0	0	0	0	0	0	0	0	0	0	0	0	0	0	0	0	0	0	0	0	0	0	0	0	0	0	0	0	0	0
Uganda	53715.3	55459.8	57267.9	59135.8	61064.6	63052.5	64952.3	66974.1	69118.7	71379.4	70069.8	68628	67060.1	65337.7	63438.7	61338.2	58964.1	56398.9	53605.6	50546.7	47191.9	43470.6	39429	35037.8	30270.8	25102.6	19501.5	13468	6975.78	0	0	0	0	0	0	0	0	0	0	0	0
Ukraine	0	0	0	0	0	0	0	0	0	0	0	0	0	0	0	0	0	0	0	0	0	0	0	0	0	0	0	0	0	0	0	0	0	0	0	0	0	0	0	0	0
United Arab Emirates	0	0	0	0	0	0	0	0	0	0	0	0	0	0	0	0	0	0	0	0	0	0	0	0	0	0	0	0	0	0	0	0	0	0	0	0	0	0	0	0	0
United Kingdom	0	0	0	0	0	0	0	0	0	0	0	0	0	0	0	0	0	0	0	0	0	0	0	0	0	0	0	0	0	0	0	0	0	0	0	0	0	0	0	0	0
United States	0	0	0	0	0	0	0	0	0	0	0	0	0	0	0	0	0	0	0	0	0	0	0	0	0	0	0	0	0	0	0	0	0	0	0	0	0	0	0	0	0
Uruguay	0	0	0	0	0	0	0	0	0	0	0	0	0	0	0	0	0	0	0	0	0	0	0	0	0	0	0	0	0	0	0	0	0	0	0	0	0	0	0	0	0
Uzbekistan	0	0	0	0	0	0	0	0	0	0	0	0	0	0	0	0	0	0	0	0	0	0	0	0	0	0	0	0	0	0	0	0	0	0	0	0	0	0	0	0	0
Vanuatu	0	0	0	0	0	0	0	0	0	0	0	0	0	0	0	0	0	0	0	0	0	0	0	0	0	0	0	0	0	0	0	0	0	0	0	0	0	0	0	0	0
Venezuela	0	0	0	0	0	0	0	0	0	0	0	0	0	0	0	0	0	0	0	0	0	0	0	0	0	0	0	0	0	0	0	0	0	0	0	0	0	0	0	0	0
Vietnam	0	0	0	0	0	0	0	0	0	0	0	0	0	0	0	0	0	0	0	0	0	0	0	0	0	0	0	0	0	0	0	0	0	0	0	0	0	0	0	0	0
Yemen	0	0	0	0	0	0	0	0	0	0	0	0	0	0	0	0	0	0	0	0	0	0	0	0	0	0	0	0	0	0	0	0	0	0	0	0	0	0	0	0	0
Zambia	0	0	0	0	0	0	0	0	0	0	0	0	0	0	0	0	0	0	0	0	0	0	0	0	0	0	0	0	0	0	0	0	0	0	0	0	0	0	0	0	0
Zimbabwe	0	0	0	0	0	0	0	0	0	0	0	0	0	0	0	0	0	0	0	0	0	0	0	0	0	0	0	0	0	0	0	0	0	0	0	0	0	0	0	0	0
WOMEN
Afghanistan	0	0	0	0	0	0	0	0	0	0	0	0	0	0	0	0	0	0	0	0	0	0	0	0	0	0	0	0	0	0	0	0	0	0	0	0	0	0	0	0	0
Albania	0	0	0	0	0	0	0	0	0	0	0	0	0	0	0	0	0	0	0	0	0	0	0	0	0	0	0	0	0	0	0	0	0	0	0	0	0	0	0	0	0
Algeria	0	0	0	0	0	0	0	0	0	0	0	0	0	0	0	0	0	0	0	0	0	0	0	0	0	0	0	0	0	0	0	0	0	0	0	0	0	0	0	0	0
Angola	10965.5	11282.4	11648.1	12043.8	12446.3	12840.4	13191.8	13547.1	13917.8	14317.7	14751.3	15210.5	15723	16276.1	16854.6	17447.1	17215.7	16961.4	16677.6	16359.8	16002.7	14694	13297.7	11796.3	10173.5	8418.89	6529.18	4498.28	2323.3	0	0	0	0	0	0	0	0	0	0	0	0
Antigua and Barbuda	0	0	0	0	0	0	0	0	0	0	0	0	0	0	0	0	0	0	0	0	0	0	0	0	0	0	0	0	0	0	0	0	0	0	0	0	0	0	0	0	0
Argentina	0	0	0	0	0	0	0	0	0	0	0	0	0	0	0	0	0	0	0	0	0	0	0	0	0	0	0	0	0	0	0	0	0	0	0	0	0	0	0	0	0
Armenia	0	0	0	0	0	0	0	0	0	0	0	0	0	0	0	0	0	0	0	0	0	0	0	0	0	0	0	0	0	0	0	0	0	0	0	0	0	0	0	0	0
Australia	0	0	0	0	0	0	0	0	0	0	0	0	0	0	0	0	0	0	0	0	0	0	0	0	0	0	0	0	0	0	0	0	0	0	0	0	0	0	0	0	0
Austria	0	0	0	0	0	0	0	0	0	0	0	0	0	0	0	0	0	0	0	0	0	0	0	0	0	0	0	0	0	0	0	0	0	0	0	0	0	0	0	0	0
Azerbaijan	0	0	0	0	0	0	0	0	0	0	0	0	0	0	0	0	0	0	0	0	0	0	0	0	0	0	0	0	0	0	0	0	0	0	0	0	0	0	0	0	0
Bahrain	0	0	0	0	0	0	0	0	0	0	0	0	0	0	0	0	0	0	0	0	0	0	0	0	0	0	0	0	0	0	0	0	0	0	0	0	0	0	0	0	0
Bangladesh	0	0	0	0	0	0	0	0	0	0	0	0	0	0	0	0	0	0	0	0	0	0	0	0	0	0	0	0	0	0	0	0	0	0	0	0	0	0	0	0	0
Barbados	0	0	0	0	0	0	0	0	0	0	0	0	0	0	0	0	0	0	0	0	0	0	0	0	0	0	0	0	0	0	0	0	0	0	0	0	0	0	0	0	0
Belarus	0	0	0	0	0	0	0	0	0	0	0	0	0	0	0	0	0	0	0	0	0	0	0	0	0	0	0	0	0	0	0	0	0	0	0	0	0	0	0	0	0
Belgium	0	0	0	0	0	0	0	0	0	0	0	0	0	0	0	0	0	0	0	0	0	0	0	0	0	0	0	0	0	0	0	0	0	0	0	0	0	0	0	0	0
Belize	0	0	0	0	0	0	0	0	0	0	0	0	0	0	0	0	0	0	0	0	0	0	0	0	0	0	0	0	0	0	0	0	0	0	0	0	0	0	0	0	0
Benin	51424.1	53143.7	52405.2	51574.8	50588	49405.3	47920.7	46282.5	44503.5	42597.6	40564.3	38420	36123.8	33647.5	30965.9	28059	24901.3	21518.2	17891.3	14004.9	9848.75	8876.97	7835.33	6721.7	5534.19	4270.48	2928.11	1505.65	0	0	0	0	0	0	0	0	0	0	0	0	0
Bhutan	0	0	0	0	0	0	0	0	0	0	0	0	0	0	0	0	0	0	0	0	0	0	0	0	0	0	0	0	0	0	0	0	0	0	0	0	0	0	0	0	0
Bolivia	0	0	0	0	0	0	0	0	0	0	0	0	0	0	0	0	0	0	0	0	0	0	0	0	0	0	0	0	0	0	0	0	0	0	0	0	0	0	0	0	0
Bosnia and Herzegovina	0	0	0	0	0	0	0	0	0	0	0	0	0	0	0	0	0	0	0	0	0	0	0	0	0	0	0	0	0	0	0	0	0	0	0	0	0	0	0	0	0
Botswana	0	0	0	0	0	0	0	0	0	0	0	0	0	0	0	0	0	0	0	0	0	0	0	0	0	0	0	0	0	0	0	0	0	0	0	0	0	0	0	0	0
Brazil	0	0	0	0	0	0	0	0	0	0	0	0	0	0	0	0	0	0	0	0	0	0	0	0	0	0	0	0	0	0	0	0	0	0	0	0	0	0	0	0	0
Brunei	0	0	0	0	0	0	0	0	0	0	0	0	0	0	0	0	0	0	0	0	0	0	0	0	0	0	0	0	0	0	0	0	0	0	0	0	0	0	0	0	0
Bulgaria	0	0	0	0	0	0	0	0	0	0	0	0	0	0	0	0	0	0	0	0	0	0	0	0	0	0	0	0	0	0	0	0	0	0	0	0	0	0	0	0	0
Burkina Faso	67392.3	69135.9	63865.1	58287.5	52376	46101.1	39408.1	32377.8	24958.3	17106.5	8792.54	0	0	0	0	0	0	0	0	0	0	0	0	0	0	0	0	0	0	0	0	0	0	0	0	0	0	0	0	0	0
Burundi	27612.7	28201.9	28830.1	29470.3	30082.3	30639.6	31030.2	31384.3	31758.6	32229.3	32844.8	33830.9	34984.8	36275.4	37648.2	39055.2	37387.7	35554.7	33532.7	31309.2	28879.3	26060.3	23047.9	19824	16372.3	12678.4	8723.94	4504.72	0	0	0	0	0	0	0	0	0	0	0	0	0
Cambodia	0	0	0	0	0	0	0	0	0	0	0	0	0	0	0	0	0	0	0	0	0	0	0	0	0	0	0	0	0	0	0	0	0	0	0	0	0	0	0	0	0
Cameroon	196914	202689	208739	215022	221502	228141	234687	241464	248448	255590	252000	247669	242892	237676	232037	225954	219109	211964	204404	196309	187593	176651	165044	152692	139532	125506	110517	94629.6	77791.5	59952.9	41066.9	21081.4	0	0	0	0	0	0	0	0	0
Canada	0	0	0	0	0	0	0	0	0	0	0	0	0	0	0	0	0	0	0	0	0	0	0	0	0	0	0	0	0	0	0	0	0	0	0	0	0	0	0	0	0
Cape Verde	0	0	0	0	0	0	0	0	0	0	0	0	0	0	0	0	0	0	0	0	0	0	0	0	0	0	0	0	0	0	0	0	0	0	0	0	0	0	0	0	0
Central African Republic	64777.9	66293.1	67983.2	69791.3	71632.3	73439.9	75140	76796.3	78414.5	80016.5	78154	75910.2	73624.5	71288.3	68890	66417.9	63893.9	61322.9	58662.4	55868.5	52907.6	49573.2	46053	42348.9	38466	34398.4	30087.8	25613.6	20945.6	16058.7	10940.8	5588.84	0	0	0	0	0	0	0	0	0
Chad	35906.1	36908.8	37967.6	39086.4	40271.2	41520.4	42760.8	44112.9	45577.8	45053.9	44481.9	43815.7	43117.4	42328.3	41393.9	40283	38908.2	37376.7	35695.3	33869.1	31892.6	28770.9	25447.2	21894.1	18086.7	14005.9	9630.35	4969.1	0	0	0	0	0	0	0	0	0	0	0	0	0
Chile	0	0	0	0	0	0	0	0	0	0	0	0	0	0	0	0	0	0	0	0	0	0	0	0	0	0	0	0	0	0	0	0	0	0	0	0	0	0	0	0	0
China	0	0	0	0	0	0	0	0	0	0	0	0	0	0	0	0	0	0	0	0	0	0	0	0	0	0	0	0	0	0	0	0	0	0	0	0	0	0	0	0	0
Colombia	0	0	0	0	0	0	0	0	0	0	0	0	0	0	0	0	0	0	0	0	0	0	0	0	0	0	0	0	0	0	0	0	0	0	0	0	0	0	0	0	0
Comoros	0	0	0	0	0	0	0	0	0	0	0	0	0	0	0	0	0	0	0	0	0	0	0	0	0	0	0	0	0	0	0	0	0	0	0	0	0	0	0	0	0
Congo	7093.93	7293.39	7499.01	7711.45	7930.92	8157.06	8389.84	8630.03	8874.49	9119.89	9363.97	9582.11	9252.19	8906.55	8548.64	8178.51	7804.44	7411.47	6990.37	6532.73	6033.68	5419.48	4765.77	4073.19	3342.19	2571.74	1758.26	902.373	0	0	0	0	0	0	0	0	0	0	0	0	0
Costa Rica	0	0	0	0	0	0	0	0	0	0	0	0	0	0	0	0	0	0	0	0	0	0	0	0	0	0	0	0	0	0	0	0	0	0	0	0	0	0	0	0	0
Côte d’Ivoire	123629	128293	133072	137921	142770	147560	141945	135629	128594	120848	112417	103090	93295.1	83071.5	72447.5	61433.4	50127.5	38352.3	26092.1	13320	0	0	0	0	0	0	0	0	0	0	0	0	0	0	0	0	0	0	0	0	0
Croatia	0	0	0	0	0	0	0	0	0	0	0	0	0	0	0	0	0	0	0	0	0	0	0	0	0	0	0	0	0	0	0	0	0	0	0	0	0	0	0	0	0
Cuba	0	0	0	0	0	0	0	0	0	0	0	0	0	0	0	0	0	0	0	0	0	0	0	0	0	0	0	0	0	0	0	0	0	0	0	0	0	0	0	0	0
Cyprus	0	0	0	0	0	0	0	0	0	0	0	0	0	0	0	0	0	0	0	0	0	0	0	0	0	0	0	0	0	0	0	0	0	0	0	0	0	0	0	0	0
Czech Republic	0	0	0	0	0	0	0	0	0	0	0	0	0	0	0	0	0	0	0	0	0	0	0	0	0	0	0	0	0	0	0	0	0	0	0	0	0	0	0	0	0
Democratic Republic of the Congo	755699	782228	811559	841920	871401	898937	920058	939651	959150	980096	1.00324e+06	1.02891e+06	1.02663e+06	1.02503e+06	1.02303e+06	1.01981e+06	1.01373e+06	1.00756e+06	1.0008e+06	992929	983469	961216	937538	911981	884130	853603	819439	782992	743920	701919	656694	607421	555210	499689	440525	377467	310143	238964	163675	84072.3	0
Denmark	0	0	0	0	0	0	0	0	0	0	0	0	0	0	0	0	0	0	0	0	0	0	0	0	0	0	0	0	0	0	0	0	0	0	0	0	0	0	0	0	0
Djibouti	0	0	0	0	0	0	0	0	0	0	0	0	0	0	0	0	0	0	0	0	0	0	0	0	0	0	0	0	0	0	0	0	0	0	0	0	0	0	0	0	0
Dominican Republic	0	0	0	0	0	0	0	0	0	0	0	0	0	0	0	0	0	0	0	0	0	0	0	0	0	0	0	0	0	0	0	0	0	0	0	0	0	0	0	0	0
Ecuador	0	0	0	0	0	0	0	0	0	0	0	0	0	0	0	0	0	0	0	0	0	0	0	0	0	0	0	0	0	0	0	0	0	0	0	0	0	0	0	0	0
Egypt	0	0	0	0	0	0	0	0	0	0	0	0	0	0	0	0	0	0	0	0	0	0	0	0	0	0	0	0	0	0	0	0	0	0	0	0	0	0	0	0	0
El Salvador	0	0	0	0	0	0	0	0	0	0	0	0	0	0	0	0	0	0	0	0	0	0	0	0	0	0	0	0	0	0	0	0	0	0	0	0	0	0	0	0	0
Equatorial Guinea	3427.66	3518.77	3626.21	3745.78	3872.22	4001.87	4141.08	4280.69	4423.04	4571.75	4581.13	4579.84	4578.06	4573.23	4561.21	4539.14	4500.75	4454.34	4400.03	4338.86	4270.71	4028.13	3772.62	3500.28	3207.33	2891.57	2551.21	2188.08	1801.22	1389.92	953.227	489.801	0	0	0	0	0	0	0	0	0
Eritrea	0	0	0	0	0	0	0	0	0	0	0	0	0	0	0	0	0	0	0	0	0	0	0	0	0	0	0	0	0	0	0	0	0	0	0	0	0	0	0	0	0
Estonia	0	0	0	0	0	0	0	0	0	0	0	0	0	0	0	0	0	0	0	0	0	0	0	0	0	0	0	0	0	0	0	0	0	0	0	0	0	0	0	0	0
Ethiopia	74817.8	77350.5	80128.1	83078.7	86083.2	89036.1	91645.7	94250.4	96888.5	99644.6	102574	105506	103316	101019	98496.5	95672.6	92601.4	89214.1	85498	81448.2	77049.9	72897.1	68380.1	63486.2	58199.9	52503.3	46342.4	39772.1	32764.4	25296.1	17352.2	8920	0	0	0	0	0	0	0	0	0
Federated States of Micronesia	0	0	0	0	0	0	0	0	0	0	0	0	0	0	0	0	0	0	0	0	0	0	0	0	0	0	0	0	0	0	0	0	0	0	0	0	0	0	0	0	0
Fiji	0	0	0	0	0	0	0	0	0	0	0	0	0	0	0	0	0	0	0	0	0	0	0	0	0	0	0	0	0	0	0	0	0	0	0	0	0	0	0	0	0
Finland	0	0	0	0	0	0	0	0	0	0	0	0	0	0	0	0	0	0	0	0	0	0	0	0	0	0	0	0	0	0	0	0	0	0	0	0	0	0	0	0	0
France	0	0	0	0	0	0	0	0	0	0	0	0	0	0	0	0	0	0	0	0	0	0	0	0	0	0	0	0	0	0	0	0	0	0	0	0	0	0	0	0	0
Gabon	0	0	0	0	0	0	0	0	0	0	0	0	0	0	0	0	0	0	0	0	0	0	0	0	0	0	0	0	0	0	0	0	0	0	0	0	0	0	0	0	0
Georgia	0	0	0	0	0	0	0	0	0	0	0	0	0	0	0	0	0	0	0	0	0	0	0	0	0	0	0	0	0	0	0	0	0	0	0	0	0	0	0	0	0
Germany	0	0	0	0	0	0	0	0	0	0	0	0	0	0	0	0	0	0	0	0	0	0	0	0	0	0	0	0	0	0	0	0	0	0	0	0	0	0	0	0	0
Ghana	84353.6	87034	85243.2	83239.8	80939.1	78297.8	75212.1	71847.5	68239.9	64420.9	60395.2	56261.1	51839	47105.3	42037.9	36608.2	30760.7	24528	17863.2	10736.3	3148.01	2955.48	2749.03	2529.59	2298.41	2055.94	1802.04	1535.71	1256.36	963.412	656.497	335.378	0	0	0	0	0	0	0	0	0
Greece	0	0	0	0	0	0	0	0	0	0	0	0	0	0	0	0	0	0	0	0	0	0	0	0	0	0	0	0	0	0	0	0	0	0	0	0	0	0	0	0	0
Grenada	0	0	0	0	0	0	0	0	0	0	0	0	0	0	0	0	0	0	0	0	0	0	0	0	0	0	0	0	0	0	0	0	0	0	0	0	0	0	0	0	0
Guatemala	0	0	0	0	0	0	0	0	0	0	0	0	0	0	0	0	0	0	0	0	0	0	0	0	0	0	0	0	0	0	0	0	0	0	0	0	0	0	0	0	0
Guinea	41349.2	43537.7	46097.5	48802	51384.9	53684.9	52052.6	49919.5	47441.8	44772.1	41990.7	39051.9	36023	32912.3	29720.7	26433.1	23065.8	19577.9	15915.4	12036.9	7921.49	7120.72	6271.77	5370.77	4414.76	3401.2	2328.41	1195.6	0	0	0	0	0	0	0	0	0	0	0	0	0
Guinea-Bissau	4011.81	4121.16	3803.04	3460.78	3099.92	2721.41	2316.55	1896.27	1456.9	995.08	509.481	0	0	0	0	0	0	0	0	0	0	0	0	0	0	0	0	0	0	0	0	0	0	0	0	0	0	0	0	0	0
Guyana	0	0	0	0	0	0	0	0	0	0	0	0	0	0	0	0	0	0	0	0	0	0	0	0	0	0	0	0	0	0	0	0	0	0	0	0	0	0	0	0	0
Haiti	0	0	0	0	0	0	0	0	0	0	0	0	0	0	0	0	0	0	0	0	0	0	0	0	0	0	0	0	0	0	0	0	0	0	0	0	0	0	0	0	0
Honduras	0	0	0	0	0	0	0	0	0	0	0	0	0	0	0	0	0	0	0	0	0	0	0	0	0	0	0	0	0	0	0	0	0	0	0	0	0	0	0	0	0
Hungary	0	0	0	0	0	0	0	0	0	0	0	0	0	0	0	0	0	0	0	0	0	0	0	0	0	0	0	0	0	0	0	0	0	0	0	0	0	0	0	0	0
Iceland	0	0	0	0	0	0	0	0	0	0	0	0	0	0	0	0	0	0	0	0	0	0	0	0	0	0	0	0	0	0	0	0	0	0	0	0	0	0	0	0	0
India	0	0	0	0	0	0	0	0	0	0	0	0	0	0	0	0	0	0	0	0	0	0	0	0	0	0	0	0	0	0	0	0	0	0	0	0	0	0	0	0	0
Indonesia	0	0	0	0	0	0	0	0	0	0	0	0	0	0	0	0	0	0	0	0	0	0	0	0	0	0	0	0	0	0	0	0	0	0	0	0	0	0	0	0	0
Iran	0	0	0	0	0	0	0	0	0	0	0	0	0	0	0	0	0	0	0	0	0	0	0	0	0	0	0	0	0	0	0	0	0	0	0	0	0	0	0	0	0
Iraq	0	0	0	0	0	0	0	0	0	0	0	0	0	0	0	0	0	0	0	0	0	0	0	0	0	0	0	0	0	0	0	0	0	0	0	0	0	0	0	0	0
Ireland	0	0	0	0	0	0	0	0	0	0	0	0	0	0	0	0	0	0	0	0	0	0	0	0	0	0	0	0	0	0	0	0	0	0	0	0	0	0	0	0	0
Israel	0	0	0	0	0	0	0	0	0	0	0	0	0	0	0	0	0	0	0	0	0	0	0	0	0	0	0	0	0	0	0	0	0	0	0	0	0	0	0	0	0
Italy	0	0	0	0	0	0	0	0	0	0	0	0	0	0	0	0	0	0	0	0	0	0	0	0	0	0	0	0	0	0	0	0	0	0	0	0	0	0	0	0	0
Jamaica	0	0	0	0	0	0	0	0	0	0	0	0	0	0	0	0	0	0	0	0	0	0	0	0	0	0	0	0	0	0	0	0	0	0	0	0	0	0	0	0	0
Japan	0	0	0	0	0	0	0	0	0	0	0	0	0	0	0	0	0	0	0	0	0	0	0	0	0	0	0	0	0	0	0	0	0	0	0	0	0	0	0	0	0
Jordan	0	0	0	0	0	0	0	0	0	0	0	0	0	0	0	0	0	0	0	0	0	0	0	0	0	0	0	0	0	0	0	0	0	0	0	0	0	0	0	0	0
Kazakhstan	0	0	0	0	0	0	0	0	0	0	0	0	0	0	0	0	0	0	0	0	0	0	0	0	0	0	0	0	0	0	0	0	0	0	0	0	0	0	0	0	0
Kenya	0	0	0	0	0	0	0	0	0	0	0	0	0	0	0	0	0	0	0	0	0	0	0	0	0	0	0	0	0	0	0	0	0	0	0	0	0	0	0	0	0
Kiribati	0	0	0	0	0	0	0	0	0	0	0	0	0	0	0	0	0	0	0	0	0	0	0	0	0	0	0	0	0	0	0	0	0	0	0	0	0	0	0	0	0
Kuwait	0	0	0	0	0	0	0	0	0	0	0	0	0	0	0	0	0	0	0	0	0	0	0	0	0	0	0	0	0	0	0	0	0	0	0	0	0	0	0	0	0
Kyrgyzstan	0	0	0	0	0	0	0	0	0	0	0	0	0	0	0	0	0	0	0	0	0	0	0	0	0	0	0	0	0	0	0	0	0	0	0	0	0	0	0	0	0
Laos	0	0	0	0	0	0	0	0	0	0	0	0	0	0	0	0	0	0	0	0	0	0	0	0	0	0	0	0	0	0	0	0	0	0	0	0	0	0	0	0	0
Latvia	0	0	0	0	0	0	0	0	0	0	0	0	0	0	0	0	0	0	0	0	0	0	0	0	0	0	0	0	0	0	0	0	0	0	0	0	0	0	0	0	0
Lebanon	0	0	0	0	0	0	0	0	0	0	0	0	0	0	0	0	0	0	0	0	0	0	0	0	0	0	0	0	0	0	0	0	0	0	0	0	0	0	0	0	0
Lesotho	0	0	0	0	0	0	0	0	0	0	0	0	0	0	0	0	0	0	0	0	0	0	0	0	0	0	0	0	0	0	0	0	0	0	0	0	0	0	0	0	0
Liberia	45895.2	45230	44634.5	44384.8	44803.6	46026.5	48652.9	52319.6	56469.4	60437	63823.3	65961.6	67428.7	68601.3	69958.6	71791.8	74322.9	71782.9	69051.4	65831.3	61992.9	56904.1	51243.6	45113.9	38596.4	31713	24437.1	16741.4	8602.4	0	0	0	0	0	0	0	0	0	0	0	0
Libya	0	0	0	0	0	0	0	0	0	0	0	0	0	0	0	0	0	0	0	0	0	0	0	0	0	0	0	0	0	0	0	0	0	0	0	0	0	0	0	0	0
Lithuania	0	0	0	0	0	0	0	0	0	0	0	0	0	0	0	0	0	0	0	0	0	0	0	0	0	0	0	0	0	0	0	0	0	0	0	0	0	0	0	0	0
Luxembourg	0	0	0	0	0	0	0	0	0	0	0	0	0	0	0	0	0	0	0	0	0	0	0	0	0	0	0	0	0	0	0	0	0	0	0	0	0	0	0	0	0
Macedonia	0	0	0	0	0	0	0	0	0	0	0	0	0	0	0	0	0	0	0	0	0	0	0	0	0	0	0	0	0	0	0	0	0	0	0	0	0	0	0	0	0
Madagascar	0	0	0	0	0	0	0	0	0	0	0	0	0	0	0	0	0	0	0	0	0	0	0	0	0	0	0	0	0	0	0	0	0	0	0	0	0	0	0	0	0
Malawi	20622.4	21035.6	21225.8	21301	21402.4	21620	21951.3	22455.9	22117	21761.2	21339.1	20858.2	20327.6	19755.6	19150.6	18513	17849.2	17133.4	16367.2	15555.8	14697.6	13224.1	11690	10062.9	8314.09	6432.17	4428.02	2280.98	0	0	0	0	0	0	0	0	0	0	0	0	0
Malaysia	0	0	0	0	0	0	0	0	0	0	0	0	0	0	0	0	0	0	0	0	0	0	0	0	0	0	0	0	0	0	0	0	0	0	0	0	0	0	0	0	0
Maldives	0	0	0	0	0	0	0	0	0	0	0	0	0	0	0	0	0	0	0	0	0	0	0	0	0	0	0	0	0	0	0	0	0	0	0	0	0	0	0	0	0
Mali	16101.9	16414.9	15106.2	13755	12334	10827.1	9224.77	7551.49	5799.76	3962.63	2031.86	0	0	0	0	0	0	0	0	0	0	0	0	0	0	0	0	0	0	0	0	0	0	0	0	0	0	0	0	0	0
Malta	0	0	0	0	0	0	0	0	0	0	0	0	0	0	0	0	0	0	0	0	0	0	0	0	0	0	0	0	0	0	0	0	0	0	0	0	0	0	0	0	0
Mauritania	0	0	0	0	0	0	0	0	0	0	0	0	0	0	0	0	0	0	0	0	0	0	0	0	0	0	0	0	0	0	0	0	0	0	0	0	0	0	0	0	0
Mauritius	0	0	0	0	0	0	0	0	0	0	0	0	0	0	0	0	0	0	0	0	0	0	0	0	0	0	0	0	0	0	0	0	0	0	0	0	0	0	0	0	0
Mexico	0	0	0	0	0	0	0	0	0	0	0	0	0	0	0	0	0	0	0	0	0	0	0	0	0	0	0	0	0	0	0	0	0	0	0	0	0	0	0	0	0
Moldova	0	0	0	0	0	0	0	0	0	0	0	0	0	0	0	0	0	0	0	0	0	0	0	0	0	0	0	0	0	0	0	0	0	0	0	0	0	0	0	0	0
Mongolia	0	0	0	0	0	0	0	0	0	0	0	0	0	0	0	0	0	0	0	0	0	0	0	0	0	0	0	0	0	0	0	0	0	0	0	0	0	0	0	0	0
Montenegro	0	0	0	0	0	0	0	0	0	0	0	0	0	0	0	0	0	0	0	0	0	0	0	0	0	0	0	0	0	0	0	0	0	0	0	0	0	0	0	0	0
Morocco	0	0	0	0	0	0	0	0	0	0	0	0	0	0	0	0	0	0	0	0	0	0	0	0	0	0	0	0	0	0	0	0	0	0	0	0	0	0	0	0	0
Mozambique	0	0	0	0	0	0	0	0	0	0	0	0	0	0	0	0	0	0	0	0	0	0	0	0	0	0	0	0	0	0	0	0	0	0	0	0	0	0	0	0	0
Myanmar	0	0	0	0	0	0	0	0	0	0	0	0	0	0	0	0	0	0	0	0	0	0	0	0	0	0	0	0	0	0	0	0	0	0	0	0	0	0	0	0	0
Namibia	0	0	0	0	0	0	0	0	0	0	0	0	0	0	0	0	0	0	0	0	0	0	0	0	0	0	0	0	0	0	0	0	0	0	0	0	0	0	0	0	0
Nepal	0	0	0	0	0	0	0	0	0	0	0	0	0	0	0	0	0	0	0	0	0	0	0	0	0	0	0	0	0	0	0	0	0	0	0	0	0	0	0	0	0
Netherlands	0	0	0	0	0	0	0	0	0	0	0	0	0	0	0	0	0	0	0	0	0	0	0	0	0	0	0	0	0	0	0	0	0	0	0	0	0	0	0	0	0
New Zealand	0	0	0	0	0	0	0	0	0	0	0	0	0	0	0	0	0	0	0	0	0	0	0	0	0	0	0	0	0	0	0	0	0	0	0	0	0	0	0	0	0
Nicaragua	0	0	0	0	0	0	0	0	0	0	0	0	0	0	0	0	0	0	0	0	0	0	0	0	0	0	0	0	0	0	0	0	0	0	0	0	0	0	0	0	0
Niger	2368.95	2440.8	2266.53	2080.4	1880.33	1664.36	1429.11	1180.4	915.235	631.167	326.425	0	0	0	0	0	0	0	0	0	0	0	0	0	0	0	0	0	0	0	0	0	0	0	0	0	0	0	0	0	0
Nigeria	550760	565311	580395	595929	611809	627889	643588	659927	676783	664190	650283	634516	617984	600475	581808	561805	540515	518196	494575	469400	442473	403977	363134	319795	273848	225147	173560	119015	61232	0	0	0	0	0	0	0	0	0	0	0	0
North Korea	0	0	0	0	0	0	0	0	0	0	0	0	0	0	0	0	0	0	0	0	0	0	0	0	0	0	0	0	0	0	0	0	0	0	0	0	0	0	0	0	0
Norway	0	0	0	0	0	0	0	0	0	0	0	0	0	0	0	0	0	0	0	0	0	0	0	0	0	0	0	0	0	0	0	0	0	0	0	0	0	0	0	0	0
Oman	0	0	0	0	0	0	0	0	0	0	0	0	0	0	0	0	0	0	0	0	0	0	0	0	0	0	0	0	0	0	0	0	0	0	0	0	0	0	0	0	0
Pakistan	0	0	0	0	0	0	0	0	0	0	0	0	0	0	0	0	0	0	0	0	0	0	0	0	0	0	0	0	0	0	0	0	0	0	0	0	0	0	0	0	0
Palestine	0	0	0	0	0	0	0	0	0	0	0	0	0	0	0	0	0	0	0	0	0	0	0	0	0	0	0	0	0	0	0	0	0	0	0	0	0	0	0	0	0
Panama	0	0	0	0	0	0	0	0	0	0	0	0	0	0	0	0	0	0	0	0	0	0	0	0	0	0	0	0	0	0	0	0	0	0	0	0	0	0	0	0	0
Papua New Guinea	0	0	0	0	0	0	0	0	0	0	0	0	0	0	0	0	0	0	0	0	0	0	0	0	0	0	0	0	0	0	0	0	0	0	0	0	0	0	0	0	0
Paraguay	0	0	0	0	0	0	0	0	0	0	0	0	0	0	0	0	0	0	0	0	0	0	0	0	0	0	0	0	0	0	0	0	0	0	0	0	0	0	0	0	0
Peru	0	0	0	0	0	0	0	0	0	0	0	0	0	0	0	0	0	0	0	0	0	0	0	0	0	0	0	0	0	0	0	0	0	0	0	0	0	0	0	0	0
Philippines	0	0	0	0	0	0	0	0	0	0	0	0	0	0	0	0	0	0	0	0	0	0	0	0	0	0	0	0	0	0	0	0	0	0	0	0	0	0	0	0	0
Poland	0	0	0	0	0	0	0	0	0	0	0	0	0	0	0	0	0	0	0	0	0	0	0	0	0	0	0	0	0	0	0	0	0	0	0	0	0	0	0	0	0
Portugal	0	0	0	0	0	0	0	0	0	0	0	0	0	0	0	0	0	0	0	0	0	0	0	0	0	0	0	0	0	0	0	0	0	0	0	0	0	0	0	0	0
Qatar	0	0	0	0	0	0	0	0	0	0	0	0	0	0	0	0	0	0	0	0	0	0	0	0	0	0	0	0	0	0	0	0	0	0	0	0	0	0	0	0	0
Romania	0	0	0	0	0	0	0	0	0	0	0	0	0	0	0	0	0	0	0	0	0	0	0	0	0	0	0	0	0	0	0	0	0	0	0	0	0	0	0	0	0
Russia	0	0	0	0	0	0	0	0	0	0	0	0	0	0	0	0	0	0	0	0	0	0	0	0	0	0	0	0	0	0	0	0	0	0	0	0	0	0	0	0	0
Rwanda	0	0	0	0	0	0	0	0	0	0	0	0	0	0	0	0	0	0	0	0	0	0	0	0	0	0	0	0	0	0	0	0	0	0	0	0	0	0	0	0	0
Saint Lucia	0	0	0	0	0	0	0	0	0	0	0	0	0	0	0	0	0	0	0	0	0	0	0	0	0	0	0	0	0	0	0	0	0	0	0	0	0	0	0	0	0
Saint Vincent and the Grenadines	0	0	0	0	0	0	0	0	0	0	0	0	0	0	0	0	0	0	0	0	0	0	0	0	0	0	0	0	0	0	0	0	0	0	0	0	0	0	0	0	0
Samoa	0	0	0	0	0	0	0	0	0	0	0	0	0	0	0	0	0	0	0	0	0	0	0	0	0	0	0	0	0	0	0	0	0	0	0	0	0	0	0	0	0
São Tomé and Príncipe	0	0	0	0	0	0	0	0	0	0	0	0	0	0	0	0	0	0	0	0	0	0	0	0	0	0	0	0	0	0	0	0	0	0	0	0	0	0	0	0	0
Saudi Arabia	0	0	0	0	0	0	0	0	0	0	0	0	0	0	0	0	0	0	0	0	0	0	0	0	0	0	0	0	0	0	0	0	0	0	0	0	0	0	0	0	0
Senegal	498.374	514.466	478.436	439.561	397.348	351.539	301.628	248.397	191.76	131.595	67.7295	0	0	0	0	0	0	0	0	0	0	0	0	0	0	0	0	0	0	0	0	0	0	0	0	0	0	0	0	0	0
Serbia	0	0	0	0	0	0	0	0	0	0	0	0	0	0	0	0	0	0	0	0	0	0	0	0	0	0	0	0	0	0	0	0	0	0	0	0	0	0	0	0	0
Seychelles	0	0	0	0	0	0	0	0	0	0	0	0	0	0	0	0	0	0	0	0	0	0	0	0	0	0	0	0	0	0	0	0	0	0	0	0	0	0	0	0	0
Sierra Leone	42685.1	42823.8	42678.3	42386.8	42111	41951.8	41914.7	42072.4	42491.9	43248.6	44359.3	45973.9	48096.2	50489.9	52874.4	55073.1	50710	45799.3	40460.9	34798.9	28852.6	25801.4	22594.4	19232.2	15714.3	12036.3	8182.47	4175.15	0	0	0	0	0	0	0	0	0	0	0	0	0
Singapore	0	0	0	0	0	0	0	0	0	0	0	0	0	0	0	0	0	0	0	0	0	0	0	0	0	0	0	0	0	0	0	0	0	0	0	0	0	0	0	0	0
Slovakia	0	0	0	0	0	0	0	0	0	0	0	0	0	0	0	0	0	0	0	0	0	0	0	0	0	0	0	0	0	0	0	0	0	0	0	0	0	0	0	0	0
Slovenia	0	0	0	0	0	0	0	0	0	0	0	0	0	0	0	0	0	0	0	0	0	0	0	0	0	0	0	0	0	0	0	0	0	0	0	0	0	0	0	0	0
Solomon Islands	0	0	0	0	0	0	0	0	0	0	0	0	0	0	0	0	0	0	0	0	0	0	0	0	0	0	0	0	0	0	0	0	0	0	0	0	0	0	0	0	0
Somalia	0	0	0	0	0	0	0	0	0	0	0	0	0	0	0	0	0	0	0	0	0	0	0	0	0	0	0	0	0	0	0	0	0	0	0	0	0	0	0	0	0
South Africa	0	0	0	0	0	0	0	0	0	0	0	0	0	0	0	0	0	0	0	0	0	0	0	0	0	0	0	0	0	0	0	0	0	0	0	0	0	0	0	0	0
South Korea	0	0	0	0	0	0	0	0	0	0	0	0	0	0	0	0	0	0	0	0	0	0	0	0	0	0	0	0	0	0	0	0	0	0	0	0	0	0	0	0	0
Spain	0	0	0	0	0	0	0	0	0	0	0	0	0	0	0	0	0	0	0	0	0	0	0	0	0	0	0	0	0	0	0	0	0	0	0	0	0	0	0	0	0
Sri Lanka	0	0	0	0	0	0	0	0	0	0	0	0	0	0	0	0	0	0	0	0	0	0	0	0	0	0	0	0	0	0	0	0	0	0	0	0	0	0	0	0	0
Sudan	182511	187990	193923	200180	206610	213103	219242	225636	232294	239216	246391	253728	261419	269459	277875	286653	295484	304888	314718	284314	251478	226666	200009	171510	141169	108929	74643.6	38367.8	0	0	0	0	0	0	0	0	0	0	0	0	0
Suriname	0	0	0	0	0	0	0	0	0	0	0	0	0	0	0	0	0	0	0	0	0	0	0	0	0	0	0	0	0	0	0	0	0	0	0	0	0	0	0	0	0
Swaziland	0	0	0	0	0	0	0	0	0	0	0	0	0	0	0	0	0	0	0	0	0	0	0	0	0	0	0	0	0	0	0	0	0	0	0	0	0	0	0	0	0
Sweden	0	0	0	0	0	0	0	0	0	0	0	0	0	0	0	0	0	0	0	0	0	0	0	0	0	0	0	0	0	0	0	0	0	0	0	0	0	0	0	0	0
Switzerland	0	0	0	0	0	0	0	0	0	0	0	0	0	0	0	0	0	0	0	0	0	0	0	0	0	0	0	0	0	0	0	0	0	0	0	0	0	0	0	0	0
Syria	0	0	0	0	0	0	0	0	0	0	0	0	0	0	0	0	0	0	0	0	0	0	0	0	0	0	0	0	0	0	0	0	0	0	0	0	0	0	0	0	0
Tajikistan	0	0	0	0	0	0	0	0	0	0	0	0	0	0	0	0	0	0	0	0	0	0	0	0	0	0	0	0	0	0	0	0	0	0	0	0	0	0	0	0	0
Tanzania	61135	63172.4	65389.6	67708	70029.1	72289.1	74323.5	76307.7	78276.2	76992.3	75592.9	74014.8	72336.9	70559.9	68681.8	66691.7	64557.1	62331.4	59986.5	57498.4	54843.1	50235.7	45356.6	40144.6	34547	28531.5	22091	15195.3	7836.17	0	0	0	0	0	0	0	0	0	0	0	0
Thailand	0	0	0	0	0	0	0	0	0	0	0	0	0	0	0	0	0	0	0	0	0	0	0	0	0	0	0	0	0	0	0	0	0	0	0	0	0	0	0	0	0
The Bahamas	0	0	0	0	0	0	0	0	0	0	0	0	0	0	0	0	0	0	0	0	0	0	0	0	0	0	0	0	0	0	0	0	0	0	0	0	0	0	0	0	0
The Gambia	0	0	0	0	0	0	0	0	0	0	0	0	0	0	0	0	0	0	0	0	0	0	0	0	0	0	0	0	0	0	0	0	0	0	0	0	0	0	0	0	0
Timor-Leste	0	0	0	0	0	0	0	0	0	0	0	0	0	0	0	0	0	0	0	0	0	0	0	0	0	0	0	0	0	0	0	0	0	0	0	0	0	0	0	0	0
Togo	10141.7	10440.5	10220.5	9978.52	9710.5	9413.62	9087.08	8732.27	8348.13	7933.7	7487.42	7007.76	6496.2	5951.12	5371.08	4754.48	4098.33	3406.25	2674.98	1901.66	1084.26	974.254	857.478	733.634	602.531	463.9	317.443	163.002	0	0	0	0	0	0	0	0	0	0	0	0	0
Tonga	0	0	0	0	0	0	0	0	0	0	0	0	0	0	0	0	0	0	0	0	0	0	0	0	0	0	0	0	0	0	0	0	0	0	0	0	0	0	0	0	0
Trinidad and Tobago	0	0	0	0	0	0	0	0	0	0	0	0	0	0	0	0	0	0	0	0	0	0	0	0	0	0	0	0	0	0	0	0	0	0	0	0	0	0	0	0	0
Tunisia	0	0	0	0	0	0	0	0	0	0	0	0	0	0	0	0	0	0	0	0	0	0	0	0	0	0	0	0	0	0	0	0	0	0	0	0	0	0	0	0	0
Turkey	0	0	0	0	0	0	0	0	0	0	0	0	0	0	0	0	0	0	0	0	0	0	0	0	0	0	0	0	0	0	0	0	0	0	0	0	0	0	0	0	0
Turkmenistan	0	0	0	0	0	0	0	0	0	0	0	0	0	0	0	0	0	0	0	0	0	0	0	0	0	0	0	0	0	0	0	0	0	0	0	0	0	0	0	0	0
Uganda	46219.8	47719	49267.3	50859	52492.6	54165.4	55745	57413.6	59174.3	61025.1	59853.1	58574.8	57193.2	55686.1	54036.4	52225.2	50201.1	48021.8	45659.2	43084.5	40273	37080	33619.3	29865	25793.4	21382.8	16607.4	11466.1	5937.21	0	0	0	0	0	0	0	0	0	0	0	0
Ukraine	0	0	0	0	0	0	0	0	0	0	0	0	0	0	0	0	0	0	0	0	0	0	0	0	0	0	0	0	0	0	0	0	0	0	0	0	0	0	0	0	0
United Arab Emirates	0	0	0	0	0	0	0	0	0	0	0	0	0	0	0	0	0	0	0	0	0	0	0	0	0	0	0	0	0	0	0	0	0	0	0	0	0	0	0	0	0
United Kingdom	0	0	0	0	0	0	0	0	0	0	0	0	0	0	0	0	0	0	0	0	0	0	0	0	0	0	0	0	0	0	0	0	0	0	0	0	0	0	0	0	0
United States	0	0	0	0	0	0	0	0	0	0	0	0	0	0	0	0	0	0	0	0	0	0	0	0	0	0	0	0	0	0	0	0	0	0	0	0	0	0	0	0	0
Uruguay	0	0	0	0	0	0	0	0	0	0	0	0	0	0	0	0	0	0	0	0	0	0	0	0	0	0	0	0	0	0	0	0	0	0	0	0	0	0	0	0	0
Uzbekistan	0	0	0	0	0	0	0	0	0	0	0	0	0	0	0	0	0	0	0	0	0	0	0	0	0	0	0	0	0	0	0	0	0	0	0	0	0	0	0	0	0
Vanuatu	0	0	0	0	0	0	0	0	0	0	0	0	0	0	0	0	0	0	0	0	0	0	0	0	0	0	0	0	0	0	0	0	0	0	0	0	0	0	0	0	0
Venezuela	0	0	0	0	0	0	0	0	0	0	0	0	0	0	0	0	0	0	0	0	0	0	0	0	0	0	0	0	0	0	0	0	0	0	0	0	0	0	0	0	0
Vietnam	0	0	0	0	0	0	0	0	0	0	0	0	0	0	0	0	0	0	0	0	0	0	0	0	0	0	0	0	0	0	0	0	0	0	0	0	0	0	0	0	0
Yemen	0	0	0	0	0	0	0	0	0	0	0	0	0	0	0	0	0	0	0	0	0	0	0	0	0	0	0	0	0	0	0	0	0	0	0	0	0	0	0	0	0
Zambia	0	0	0	0	0	0	0	0	0	0	0	0	0	0	0	0	0	0	0	0	0	0	0	0	0	0	0	0	0	0	0	0	0	0	0	0	0	0	0	0	0
Zimbabwe	0	0	0	0	0	0	0	0	0	0	0	0	0	0	0	0	0	0	0	0	0	0	0	0	0	0	0	0	0	0	0	0	0	0	0	0	0	0	0	0	0

## Sheet: Input
Input parameters used in the economic analyses
	Brief description	Variable name	Value	References and remarks
	Discount rate for costs	discrate	0	0% used for initial analyses
	Poverty limit per day		1.25
	Poverty line	Poverty_line	456.562
Distribution of disease across income quintiles
	% in lowest quintile (poorest 20%)	quint1	1
	% in second quintile	quint2	0
	% in third quintile	quint3	0
	% in fourth quintile	quint4	0
	% in fifth quintile (richest 20%)	quint5	0
	Error check to ensure %'s total 100%
Distribution of skin disease
	Mild Skin disease		0.679	Wilma case mix 15+
	Moderate Skin disease		0.321	Wilma case mix 15+
	Error check to ensure %'s total 100%
Productivity loss
	Mild Skin Disease (minimum)	PL_MIN_mild	0	assumption
	Mild Skin Disease (maximum)	PL_MAX_mild
	Moderate Skin Disease (minimum)	PL_MIN_moderate	0.1	Kim et al. 1997
	Moderate Skin Disease (maximum)	PL_MAX_moderate
Weighted average productivity loss
	Minimum estimate of productivity loss	Mean_MIN_PL	0.0321
	Maximum estimate of productivity loss	Mean_MAX_PL
		prodloss	0.0321

## Sheet: GDP
	GDP per capita PPP (constant 2005)																					(year used from WDI data)	Income share held by					GDP per quintile						Prevalence per Quintile						Weighted Income		Employement to pop rate, 15, total		Income corrected for unemployment		Decisions (is income without disease less than poverty line (1=yes, 0=no)
MEN	1990	1991	1992	1993	1994	1995	1996	1997	1998	1999	2000	2001	2002	2003	2004	2005	2006	2007	2008	2009	2010		Q1	Q2	Q3	Q4	Q5	Q1	Q2	Q3	Q4	Q5		Q1	Q2	Q3	Q4	Q5		Q1-Q5
Afghanistan													760.825	792.472	770.744	827.849	847.564	937.753	947.071	1118.19	1183.05		0.094	0.136	0.174	0.221	0.375	556.031	804.471	1029.25	1307.26	2218.21		1	0	0	0	0		556.031		0.44	Afghanistan			0	0	0	0
Albania	3731.69	2617.74	2438.36	2695.57	2947.69	3366.1	3690.9	3324.1	3752.87	4141.26	4461.05	4800.72	4973.98	5296.79	5649.74	5997.9	6330.59	6732.37	7272.84	7525.78	7791.76							0	0	0	0	0		1	0	0	0	0		0		0.473	Albania
Algeria	5861.82	5650.65	5618.35	5378.78	5220.04	5314.39	5434.08	5403.29	5591.34	5686.16	5730.07	5914.06	6164.18	6521.82	6709.17	7000.5	7006.79	7123.26	7137.94	7128.01	7249.23		0.0697	0.116	0.162	0.226	0.426	2526.36	4204.55	5871.88	8191.63	15440.9		1	0	0	0	0		2526.36		0.388	Algeria			0	0	0	0
Angola	3031.31	2905.28	2618.77	1907.88	1912.22	2048.05	2213.96	2325.47	2418.27	2427.68	2426.4	2447.89	2692.41	2735.48	2927.6	3343.43	3900.41	4622.25	5088.1	5042.32	5048.11		0.054	0.096	0.145	0.218	0.486	1362.99	2423.09	3659.88	5502.44	12266.9		1	0	0	0	0		1362.99		0.644	Angola			0	0	0	0
Antigua and Barbuda	14733.4	14911.5	14795.7	15248.5	15803.6	14744.9	15313.9	15620.2	15874.9	16130.3	16602.1	15814.4	16057.1	16929.5	17584.2	18468.1	20741.7	22488.2	22244	19293.5	17610.2		0.0523	0.0987	0.1481	0.2175	0.4834	4605.07	8690.64	13040.4	19151.1	42563.9		1	0	0	0	0		4605.07			Antigua and Barbuda			0	0	0	0
Argentina	7462.31	8293.29	9160.16	9575.23	10005.2	9599.47	10006.2	10688.5	10971.4	10482.3	10290.1	9738.71	8596.05	9271.2	10019.1	10842.7	11657.8				11657.8		0.0438	0.0931	0.1478	0.2217	0.4936	2553.06	5426.71	8615.13	12922.7	28771.5		1	0	0	0	0		2553.06		0.558	Argentina			0	0	0	0
Armenia	2937.89	2618.38	1551.47	1448.46	1563.67	1706.19	1834.58	1917.12	2073.39	2155.06	2295.36	2527.98	2873.49	3288.8	3645.53	4165.79	4734.44	5408.85	7467.32	6430.85	6582.66		0.0882	0.1279	0.1651	0.2141	0.4047	2902.95	4209.61	5433.99	7046.74	13320		1	0	0	0	0		2902.95		0.499	Armenia			0	0	0	0
Australia	23865.2	23480.2	23296.4	24017.9	24727.2	25404.9	26074.7	26790.3	27712	28754.6	29506.6	29664.4	30451.2	31025.5	31939.8	32525.6	33024.4	33756.8	34425.4	34359.1	34620.9							0	0	0	0	0		1	0	0	0	0		0		0.621	Australia
Austria	25437.5	26051.5	26305.8	26227.2	26754	27425.8	28064.4	28679.9	29732.9	30725.4	31775.7	31925.7	32307.1	32428.5	33062.5	33626.4	34688.3	35834.6	36191.7	34690.5	35201.2							0	0	0	0	0		1	0	0	0	0		0		0.579	Austria
Azerbaijan	4753.93	4647.93	3543.41	2683.8	2126.15	1853.79	1859.03	1947.97	2122.52	2259.67	2489.95	2715.34	2980.84	3289.68	3593.63	4496.14	5981.24	7395.16	8021.57	8596.12	8906.8		0.0799	0.1209	0.1616	0.2168	0.4208	3558.27	5384.16	7196.69	9654.97	18739.9		1	0	0	0	0		3558.27		0.609	Azerbaijan			0	0	0	0
Bahrain	17799.3	19266	20039.5	22071.4	21476.7	21744.2	22014.4	22022.7	22325.1	22435.8	22658.8	22666.2	22757.9	23147.7	23000.7	23130.7	22826.9	22780.7	22400	21631.1	21487.7	2005	0.0643	0.1091	0.1554	0.2196	0.4516	6908.3	11721.5	16696	23593.5	48519.3		1	0	0	0	0		6908.3		0.653	Bahrain			0	0	0	0
Bangladesh	732.371	739.281	759.293	776.98	791.684	813.35	833.345	860.357	887.342	912.733	949.339	982.003	1008.32	1044.7	1094.1	1143.87	1205.11	1268.66	1333.42	1395.52	1464.32		0.0888	0.124	0.161	0.213	0.414	650.159	907.88	1178.78	1559.5	3031.15		1	0	0	0	0		650.159		0.675	Bangladesh			0	0	0	0
Barbados	19756.5	19119.3	18112.6	18239.1	18911.6	19140.6	19438.5	20625.1	21411.5	21896.4	22318.7	21659.9	21706.2	22026.7	22230.6	23004	24196.8	24480.6	24444.5	23317.4	23260.6							0	0	0	0	0		1	0	0	0	0		0		0.635	Barbados
Belarus	6434.06	6353.73	5731.41	5283.92	4671.18	4198.92	4330.94	4845.17	5277.2	5475.12	5810.04	6131.78	6482.28	6987	7840.61	8640.33	9562.58	10437.3	11545.6	11590	12504.8							0	0	0	0	0		1	0	0	0	0		0		0.495	Belarus
Belgium	25096.5	25461.7	25746.8	25399.7	26138.7	26706	27033.6	27975.5	28454.3	29394.2	30399	30539.3	30816.1	30934.9	31809.9	32189.4	32830.4	33529.9	33593.8	32391.3	32842.4							0	0	0	0	0		1	0	0	0	0		0		0.494	Belgium
Belize	4208.51	4557.54	5013.7	5233.7	5140.21	5057.98	4999.48	5031.98	5067.18	5350.98	5878.16	6006.53	6149.26	6551.71	6683.07	6707.53	6844.78	6753.07	6837.44	6687.53	6776.44	1999	0.0327	0.0859	0.1124	0.1938	0.5752	1107.95	2910.48	3808.36	6566.37	19489		1	0	0	0	0		1107.95		0.599	Belize			0	0	0	0
Benin	1100.03	1106.41	1097.69	1119.25	1101.54	1129.32	1141.79	1172.16	1184.12	1211.46	1232.18	1268.02	1281.25	1287.42	1284.51	1279.39	1286.32	1305.05	1329.95	1325.89	1321.27		0.07	0.108	0.15	0.21	0.461	462.445	713.487	990.954	1387.33	3045.53		1	0	0	0	0		462.445		0.72	Benin			0	0	0	0
Bhutan	1801.94	1797.39	1903.57	1975.97	2104.09	2263.92	2373.65	2460.16	2544.18	2672.88	2778.42	2920.77	3139.17	3281.46	3378.96	3527.67	3683.49	4255.57	4371.95	4584.08	5030.86	2007	0.0664	0.1079	0.1538	0.2204	0.4515	1670.25	2714.15	3868.73	5544.01	11357.2		1	0	0	0	0		1670.25		0.691	Bhutan			0	0	0	0
Bolivia	3012.78	3097.28	3074.66	3131.44	3202.49	3276.97	3344.73	3434.94	3531.7	3473.39	3488.05	3475.67	3491.86	3517.55	3596.22	3688.15	3799	3907.1	4080.85	4150.6	4252.44	2008	0.0213	0.068	0.1191	0.1985	0.5931	452.885	1445.83	2532.33	4220.55	12610.6		1	0	0	0	0		452.885		0.698	Bolivia			1	0	0	0
Bosnia and Herzegovina					1254.47	1574.97	3006.28	3982.51	4471.24	4755.26	4909.04	5065.6	5309.14	5524.05	5874.68	6179.37	6570.4	7031.47	7426.9	7225.29	7290.09							0	0	0	0	0		1	0	0	0	0		0		0.329	Bosnia and Herzegovina
Botswana	7875.45	8221.65	8227.23	8160.78	8240.28	8604.67	8895.44	9398.62	9271.8	9974.92	9996.71	9864.56	10315.1	10653.1	10810.8	11176.4	11937.8	12844	13217.2	12068.5	12988.4		0.0313	0.0581	0.0964	0.164	0.65	2032.68	3773.13	6260.4	10650.5	42212.3		1	0	0	0	0		2032.68		0.629	Botswana			0	0	0	0
Brazil	7174.98	7163.55	7017.37	7231.85	7501.92	7714.33	7760.28	7900.45	7784.48	7689.4	7905.65	7898.11	7998.26	7984.97	8337.67	8502.32	8745.05	9187.14	9572.94	9456.43	10079.3		0.0285	0.0713	0.124	0.19	0.586	1436.3	3593.27	6249.16	9575.32	29532.3		1	0	0	0	0		1436.3		0.645	Brazil			0	0	0	0
Brunei	49451	49578.2	50485.3	49241.6	49426.4	50303.9	50467.4	48538.7	47155.3	47503.3	47782	48034.4	48843.9	49233.1	48501.1	47760	48944.6	48153.7	46419.6	44862.2	45319.3							0	0	0	0	0		1	0	0	0	0		0		0.625	Brunei Darussalam
Bulgaria	7524.17	6957.3	6520.98	6475.91	6616.07	6835.68	6250.57	6185.26	6529.37	6695.05	7111.7	7548.89	8056.18	8548.06	9170.47	9809.4	10502.5	11231.9	11985.2	11383.1	11505.8							0	0	0	0	0		1	0	0	0	0		0		0.479	Bulgaria
Burkina Faso	709.495	753.405	735.094	740.208	729.765	750.585	810.551	838.124	874.537	913.138	903.885	936.14	956.251	1001.33	1016.06	1072.18	1111.59	1118.28	1148.87	1148.82	1204.5		0.0672	0.1058	0.1479	0.2087	0.4704	404.713	637.182	890.73	1256.9	2832.99		1	0	0	0	0		404.713		0.808	Burkina Faso			1	0	0	0
Burundi	688.563	704.876	695.909	639.331	603.907	547.349	496.796	483.133	499.952	487.523	474.002	472.07	479.164	458.536	464.928	453.439	461.683	467.18	473.922	473.748	475.384		0.09	0.119	0.154	0.21	0.428	213.923	282.854	366.046	499.153	1017.32		1	0	0	0	0		213.923		0.758	Burundi			1	1	1	0
Cambodia				773.917	815.775	841.006	860.832	884.848	906.16	990.754	1054.48	1116.43	1168.91	1246.27	1352.66	1508.14	1646.1	1788.84	1882.09	1856.59	1937.07		0.0793	0.114	0.153	0.21	0.445	768.05	1104.13	1481.86	2033.93	4309.99		1	0	0	0	0		768.05		0.811	Cambodia			0	0	0	0
Cameroon	2100.8	1962.26	1846.98	1737.32	1646.66	1654.27	1689.99	1728.78	1768.01	1797.42	1824.22	1857.28	1882.06	1907.76	1927.83	1921.79	1933.17	1937.5	1956.82	1942.92	1957.22		0.067	0.105	0.149	0.217	0.462	655.668	1027.54	1458.13	2123.58	4521.18		1	0	0	0	0		655.668		0.672	Cameroon			0	0	0	0
Canada	26941.2	26021.1	25928.6	26246.1	27243.9	27778	27925.3	28799.4	29721	31106.7	32446.8	32693.9	33349.5	33640	34343.7	35033.4	35730.4	36126.7	35949.6	34529.7	35222.5							0	0	0	0	0		1	0	0	0	0		0		0.613	Canada
Cape Verde	1018.16	1010.4	1092.86	1155.98	1340.93	1493.27	1624.82	1767.55	1949.71	2127.39	2385.9	2393.77	2473.77	2534.04	2753.29	2912.41	3123.47	3584.13	3815.1	3891.66	4018.99	2002	0.0454	0.0791	0.1227	0.1938	0.559	912.312	1589.51	2465.65	3894.41	11233.1		1	0	0	0	0		912.312						0	0	0	0
Central African Republic	754.022	733.055	669.953	656.205	672.124	704.006	660.796	680.695	697.733	708.395	677.699	695.394	708.455	659.298	687.343	681.8	720.664	765.011	779.933	833.248	871.445		0.034	0.069	0.111	0.18	0.606	148.146	300.649	483.652	784.301	2640.48		1	0	0	0	0		148.146		0.727	Central African Republic			1	1	0	0
Chad	1037.62	1091.16	1141.97	932.626	994.761	974.628	963.635	984.415	1017.28	975.161	931.854	1001.9	1045.84	1154.54	1486.33	1683.11	1638.01	1638.21	1636.75	1654.68	1822.87		0.063	0.104	0.15	0.218	0.466	574.204	947.892	1367.15	1986.93	4247.28		1	0	0	0	0		574.204		0.661	Chad			0	0	0	0
Chile	6913.58	7330.04	8079.9	8488.39	8817.3	9595.37	10150.5	10668.1	10866.7	10647.6	10990.3	11224	11336.6	11655.4	12227.6	12773.4	13201.3	13745.7	14061.4	13784.2	14443.4	2009	0.0426	0.0794	0.1174	0.1836	0.577	3076.44	5734.02	8478.26	13259	41669.1		1	0	0	0	0		3076.44		0.554	Chile			0	0	0	0
China	1100.66	1185.63	1337.5	1507.32	1685.62	1849.15	2012.86	2177.65	2325.09	2480.23	2667.47	2867.96	3108.05	3397.63	3718.64	4114.57	4611.3	5238.68	5712.25	6206.82	6819.32		0.0467	0.0974	0.153	0.232	0.471	1592.31	3321.01	5216.78	7910.41	16059.5		1	0	0	0	0		1592.31		0.678	China			0	0	0	0
Colombia	6077.7	6097.05	6283.46	6313.11	6559.69	6776.71	6793.03	6902.73	6822.06	6424.31	6596.65	6598.07	6655.37	6807.84	7060.36	7280.29	7651.42	8058.64	8223.49	8240.76	8449.59	2010	0.03	0.0683	0.1123	0.1879	0.6015	1267.44	2885.53	4744.44	7938.39	25412.1		1	0	0	0	0		1267.44		0.593	Colombia			0	0	0	0
Comoros	1281.52	1183.2	1253.56	1260.59	1165.6	1178.56	1134.95	1151.57	1137.3	1130.15	1117.36	1125.45	1142.52	1141.11	1109.41	1126.8	1111.57	1088.41	1071	1062.88	1057.71	2004	0.0255	0.0535	0.0894	0.1514	0.6802	134.858	282.937	472.796	800.686	3597.27		1	0	0	0	0		134.858		0.533	Comoros			1	1	0	0
Congo	3565.69	3556	3554.75	3429	3155.71	3193.65	3239.07	3128.52	3154.46	2989.14	3131.5	3170.03	3236.45	3185.45	3214.53	3371.94	3480.26	3322.95	3401.68	3547.15	3748.22		0.05	0.084	0.13	0.205	0.531	937.056	1574.25	2436.34	3841.93	9951.53		1	0	0	0	0		937.056		0.656	Congo, Rep.			0	0	0	0
Costa Rica	6222.09	6225.54	6632.25	6954.59	7109.09	7208.09	7091.74	7300.22	7717.98	8154.4	8115.65	8031.53	8102.41	8461.54	8665.75	9019.11	9649.33	10250	10368.5	10110	10455.7	2009	0.0385	0.08	0.1241	0.1987	0.5587	2012.73	4182.3	6487.79	10387.8	29208.1		1	0	0	0	0		2012.73		0.581	Costa Rica			0	0	0	0
Côte d’Ivoire	1973.91	1909.43	1842.85	1780.95	1740.29	1809.41	1893.99	1947.76	1988.21	1973	1861.24	1828.11	1774.42	1722.56	1729.47	1726.06	1711.45	1713	1723.06	1754.87	1761.36		0.056	0.1007	0.149	0.218	0.4763	493.181	886.845	1312.21	1919.88	4194.68		1	0	0	0	0		493.181		0.646	Cote d'Ivoire			0	0	0	0
Croatia						9925.11	10922.1	11438.3	11848.4	11588.3	12370.7	12782.5	13406.1	14126.1	14712.6	15331.9	16095.8	16925.5	17286.1	16103.3	15917.3							0	0	0	0	0		1	0	0	0	0		0		0.46	Croatia
Cuba	3635.51	3221.25	2828.87	2393.82	2398.29	2445.26	2625.24	2687.7	2682.24	2838.64	2996.63	3081.73	3115.54	3223.94	3401.69	3776.47	4228.75	4535.62	4724.57	4796.23	4913.85		0.0481667	0.0882333	0.134367	0.207233	0.522	1183.42	2167.83	3301.29	5091.56	12825.1		1	0	0	0	0		1183.42		0.552	Cuba			0	0	0	0
Cyprus	18091.4	17759.5	18918.8	18596.7	19290.8	20099.8	20147.7	20330.6	21095.7	21872	22731.9	23393.5	23587	23630.3	24062	24408.1	24929.6	25826.6	26456.3	25789.9	25198							0	0	0	0	0		1	0	0	0	0		0		0.603	Cyprus
Czech Republic	16361	14495.4	14407.2	14401.2	14814.8	15746.2	16480.1	16357.3	16334.1	16625.4	17340.8	17940.4	18382.8	19070.5	19958	21264.4	22683.4	23833.5	24359.5	23122.2	23619.7							0	0	0	0	0		1	0	0	0	0		0		0.541	Czech Republic
Democratic Republic of the Congo	657.95	580.232	498.965	414.973	384.541	375.244	361.844	334.114	322.235	302.236	274.996	262.414	264.114	271.432	281.1	294.386	302.079	312.018	322.038	322.037	335.679		0.055	0.092	0.138	0.209	0.506	92.3119	154.413	231.619	350.785	849.269		1	0	0	0	0		92.3119		0.667	Congo, Dem. Rep.			1	1	1	1
Denmark	25442.2	25706.2	26127.5	26017.3	27362.3	28054.4	28686.8	29481.6	30009.4	30676.1	31652.5	31761.6	31807.8	31843.2	32490.4	33193.2	34207.4	34595.3	34123	32017.7	32378.6							0	0	0	0	0		1	0	0	0	0		0
Djibouti	2607.47	2403.59	2339.07	2141.58	2086.1	1979.35	1864.5	1818.3	1788.83	1797.68	1777.11	1786.7	1807.12	1838.65	1882.35	1914.98	1978.97	2050.87			2050.87		0.0603	0.105	0.152	0.218	0.465	618.339	1076.71	1558.66	2235.45	4768.28		1	0	0	0	0		618.339						0	0	0	0
Dominican Republic	3806.71	3766.1	4080.33	4290.95	4307.88	4462.74	4698.19	4989.48	5252.73	5516.5	5737.36	5750.96	5991.26	5886.45	5875.55	6326.36	6901.07	7380.22	7660.4	7817.5	8312		0.0467	0.0859	0.1315	0.2081	0.5278	1940.85	3570.01	5465.14	8648.64	21935.4		1	0	0	0	0		1940.85		0.568	Dominican Republic			0	0	0	0
Ecuador	6264.86	6384.22	6373.09	6356.01	6483.59	6488.83	6463.34	6604.69	6682.71	6239.3	6183.57	6307.18	6440.02	6490.95	6894.51	7128.62	7311.78	7343.67	7679.19	7594.98	7691.75		0.0429	0.0823	0.1289	0.2071	0.5379	1649.88	3165.15	4957.33	7964.81	20687		1	0	0	0	0		1649.88		0.646	Ecuador			0	0	0	0
Egypt	3266.44	3241.21	3327.85	3370.28	3450.43	3555.33	3675.3	3817.48	3910.19	4084.34	4235.99	4316.07	4347.31	4413.16	4518.34	4642.37	4877.65	5136.2	5411.73	5570.64	5759.76		0.0924	0.13	0.164	0.21	0.403	2661.01	3743.85	4723.01	6047.75	11605.9		1	0	0	0	0		2661.01		0.442	Egypt, Arab Rep.			0	0	0	0
El Salvador	3664.11	3738.44	3957.82	4184.06	4374.36	4597.27	4628.39	4784.98	4930.84	5071.84	5154.95	5219.83	5321.56	5424.94	5506.21	5681.51	5880.37	6079.98	6128.6	5906.15	5953.33		0.0371	0.0883	0.137	0.2067	0.5309	1104.34	2628.4	4078.03	6152.77	15803.1		1	0	0	0	0		1104.34		0.575	El Salvador			0	0	0	0
Equatorial Guinea	1999.26	1912.26	2046.82	2103.27	2137.86	2363.57	2954.98	4898.65	5784.75	7927.7	8639.47	13681.8	15846.5	17513.1	23448.9	24981.8	20342.1	24096.2	27346.4	26805.5	25619.2		0.0595	0.0968333	0.141633	0.2104	0.491633	7621.72	12404	18142.7	26951.4	62976.3		1	0	0	0	0		7621.72		0.799	Equatorial Guinea			0	0	0	0
Eritrea			430.155	486.177	585.62	594.957	637.768	671.399	663.184	641.073	598.239	624.879	616.604	574.603	558.831	550.953	526.002	515.606	450.271	452.938	448.1		0.069	0.115	0.16	0.22	0.436	154.595	257.658	358.48	492.91	976.859		1	0	0	0	0		154.595		0.777	Eritrea			1	1	1	0
Estonia						7938.07	8530.55	9641.1	10397	10448	11512.5	12284.2	13142.7	14216.5	15166.1	16548	18253.4	19648.4	18846.8	16194.6	16611.3							0	0	0	0	0		1	0	0	0	0		0		0.51	Estonia
Ethiopia	543.09	487.082	429.455	469.213	468.024	480.818	524.098	524.74	492.215	503.064	518.538	545.613	538.108	511.551	564.692	614.014	662.082	718.207	774.692	820.859	879.042		0.0926	0.1322	0.1678	0.2133	0.3941	406.997	581.047	737.516	937.499	1732.15		1	0	0	0	0		406.997		0.794	Ethiopia			1	0	0	0
Federated States of Micronesia	1969.01	2062.39	2089.81	2205.03	2149.4	2269.59	2183.01	2047.5	2113.28	2151.02	2257.09	2302.1	2319.96	2366.01	2294.74	2352.64	2360.17	2324.52	2278	2311.31	2378.12							0	0	0	0	0		1	0	0	0	0		0
Fiji	3433.89	3309.95	3468.78	3493	3619.65	3662.67	3794.16	3671.15	3683.95	3977.13	3886.45	3949.32	4068.03	4103.75	4311.9	4323.66	4374.1	4298.83	4299.69	4202.02	4167.19	2009	0.062	0.0987	0.1407	0.2027	0.4959	1291.83	2056.51	2931.62	4223.45	10332.6		1	0	0	0	0		1291.83		0.503	Fiji			0	0	0	0
Finland	23141	21634.1	20763.2	20495.4	21152.9	21907.3	22615	23947.1	25085.2	26005.2	27332.8	27893.5	28336.3	28837.7	29940.2	30707.9	31939.5	33500.8	33443	30441.5	31321.7							0	0	0	0	0		1	0	0	0	0		0		0.552	Finland
France	24211.7	24401.6	24639.3	24368.9	24823.9	25240.6	25419.9	25883.2	26659.2	27395.5	28209.9	28519.5	28576	28629.6	29142.9	29452.5	29969.5	30465.5	30271.4	29168.4	29521.7							0	0	0	0	0		1	0	0	0	0		0		0.509	France
Gabon	14665.4	15148.5	14294	14470.8	14620.1	14953.8	15101.4	15564.9	15704.3	13950	13356.6	13317.8	12972	12984.9	12853.9	12931.8	12774.9	13163.1	12976.8	12299.3	12810.8	2005	0.0616	0.1012	0.1454	0.21	0.4818	3945.72	6482.26	9313.44	13451.3	30861.2		1	0	0	0	0		3945.72		0.479	Gabon			0	0	0	0
Georgia	6138.17	4809.07	2629.35	1844.72	1669.7	1759.29	2006.29	2258.68	2351.8	2438.19	2502.23	2641.55	2804.94	3135.34	3327.13	3610.49	3916.4	4409.47	4516.24	4319.02	4545.9	2010	0.0503	0.0994	0.151	0.2232	0.4761	1143.29	2259.31	3432.16	5073.23	10821.5		1	0	0	0	0		1143.29		0.535	Georgia			0	0	0	0
Germany	25881.1	27005.6	27313.5	26862.6	27431.3	27809.4	27948.3	28392.3	28916.5	29438.6	30297.6	30704.7	30656.3	30524.3	30885.4	31114.5	32302.2	33402.8	33828.9	32169.6	33511.7							0	0	0	0	0		1	0	0	0	0		0		0.551	Germany
Ghana	917.315	939.164	948.569	967.342	972.843	987.371	1008.26	1026.69	1051	1072.44	1086.09	1102.11	1123.01	1151.42	1184.75	1222.46	1267.29	1314.54	1389.32	1409.31	1486.31	2006	0.052	0.0984	0.1473	0.2164	0.4855	386.441	731.266	1094.67	1608.19	3608.02		1	0	0	0	0		386.441		0.664	Ghana			1	0	0	0
Greece	17325	17689	17617.7	17177.4	17375.7	17604.8	17894.1	18429.2	18946.5	19508.4	20316.7	21106.7	21757.9	22975.8	23896.5	24348.4	25587.7	26387.6	26227.3	25302	23998.7							0	0	0	0	0		1	0	0	0	0		0		0.472	Greece
Grenada	6283.88	6416.95	6348.83	6112.01	6210.74	6312.27	6533	6811.86	7244.81	7963.61	8148.58	7959.94	8230.07	8999.64	8882.26	10053.8	9636.64	10175.5	10246.2	9535.2	9496.55		0.0523	0.0987	0.1481	0.2175	0.4834	2483.35	4686.55	7032.19	10327.5	22953.2		1	0	0	0	0		2483.35			Grenada			0	0	0	0
Guatemala	3343.84	3386.82	3468.98	3522.14	3580.15	3671.71	3694.91	3769.43	3868.28	3925.01	3971.46	3966.81	4019.77	4020	4044.46	4073.83	4188.46	4344.66	4378.59	4294.43	4309.05		0.0308	0.0685	0.114	0.185	0.603	663.594	1475.85	2456.16	3985.87	12991.8		1	0	0	0	0		663.594		0.651	Guatemala			0	0	0	0
Guinea	854.307	830.862	809.305	802.253	792.149	794.484	803.522	824.608	838.413	855.833	862.689	879.248	909.284	904.751	908.644	916.655	918.195	911.27	931.44	904.404	897.945		0.064	0.105	0.151	0.219	0.462	287.342	471.421	677.949	983.25	2074.25		1	0	0	0	0		287.342		0.695	Guinea			1	0	0	0
Guinea-Bissau	1207.01	1240.13	1225.54	1223.08	1233.89	1259.45	1374.43	1431.58	1006.78	994.896	1008.63	1057.88	1055.43	981.402	952.892	978.201	938.258	973.685	1052.44	1040.9	1034.95	2002	0.0728	0.1164	0.1599	0.2188	0.4321	376.722	602.341	827.443	1132.24	2236.01		1	0	0	0	0		376.722		0.677	Guinea-Bissau			1	0	0	0
Guyana	1563.5	1661.15	1791.87	1936.35	2096.11	2193.69	2357.79	2493.71	2439.58	2500.1	2454.34	2498.87	2515.13	2479.99	2550.42	2487.71	2599.83	2488.8	2520.55	2586.47	2682.11	1998	0.0447	0.0978	0.1469	0.2156	0.495	599.451	1311.55	1970.01	2891.31	6638.21		1	0	0	0	0		599.451		0.484	Guyana			0	0	0	0
Haiti									1145.3	1155.59	1146.01	1115.6	1095.17	1082.45	1029.15	1032.78	1041.67	1062.35	1057.47	1073.76	1002.14	2001	0.0238	0.0625	0.1036	0.1764	0.6337	119.255	313.169	519.108	883.887	3175.28		1	0	0	0	0		119.255		0.597	Haiti			1	1	0	0
Honduras	2650.3	2661.54	2735.75	2830.28	2723.09	2765.45	2798.95	2873.91	2894.28	2780.43	2879.82	2898.07	2946.34	3018.8	3143.27	3267.56	3413.56	3553.59	3631.17	3472.92	3530.95	2009	0.0202	0.0612	0.1142	0.2051	0.5993	356.626	1080.47	2016.17	3620.99	10580.5		1	0	0	0	0		356.626		0.592	Honduras			1	0	0	0
Hungary	13119.7	11560.1	11210.3	11158.4	11503	11690.6	11729.6	12120.8	12643.9	13085.2	13673.6	14213.7	14896.6	15514.5	16294.8	16974.6	17663.6	17711.2	17900.9	16709.8	16958.3							0	0	0	0	0		1	0	0	0	0		0		0.449	Hungary
Iceland	25629.7	25277.7	24119.8	24189.4	24846.1	24740.5	25784.7	26830.9	28221.9	29024.2	29867.7	30629.1	30399.1	30924.2	33055.9	34889.2	35684.5	36875.4	36626	34106.1	32755.3							0	0	0	0	0		1	0	0	0	0		0		0.689	Iceland
India	1216.63	1205.28	1246.87	1281.5	1341.57	1416.99	1496.8	1530.2	1596.96	1708.94	1745.21	1799.64	1838.24	1951.77	2074.47	2233.86	2406.34	2606.16	2671.68	2860.55	3121.62		0.0854	0.121	0.157	0.208	0.428	1332.93	1888.58	2450.47	3246.48	6680.26		1	0	0	0	0		1332.93		0.535	India			0	0	0	0
Indonesia	2072.59	2218.47	2338.39	2466.63	2610.05	2785.08	2952.53	3045.67	2607.55	2590.45	2678.99	2736.88	2819.23	2911.92	3014.9	3141.29	3267.09	3425.31	3580.59	3695.17	3873.13	2010	0.0763	0.1133	0.1557	0.2182	0.4365	1477.6	2194.13	3015.23	4225.59	8453.11		1	0	0	0	0		1477.6		0.63	Indonesia			0	0	0	0
Iran	6036.61	6665.55	6849.38	6664.3	6565.17	6649.58	7009.02	7118.63	7179.31	7188.92	7437.98	7601.75	8068.12	8539.28	8870.03	9172.94	9600.79	10232	10344.6	10404.5	10404.5	2005	0.0643	0.1091	0.1554	0.2196	0.4516	3345.06	5675.68	8084.33	11424.2	23493.5		1	0	0	0	0		3345.06		0.382	Iran, Islamic Rep.			0	0	0	0
Iraq								3212.61	4196.43	5077.42	4714.19	4274.52	3828.46	2184.86	3115.15	3013.85	2980.57	2950.5	3071.83	3171.25	3270.35	2007	0.087	0.1275	0.1669	0.2198	0.3988	1422.6	2084.85	2729.11	3594.11	6521.07		1	0	0	0	0		1422.6		0.356	Iraq			0	0	0	0
Ireland											33188.7	34394.4	35726.3	36514.5	37417.1	38762	39893.8	41133.4	39640.6	37198.1	36785.9							0	0	0	0	0		1	0	0	0	0		0		0.525	Ireland
Israel	17863.5	18115.4	18485	19000.3	19798.1	20535.2	21103.1	21276.3	21651.5	21815.5	23212.9	22621.5	22042.9	21975.8	22636.7	23340	24213.8	25095.1	25646.3	25250.2	26197.5							0	0	0	0	0		1	0	0	0	0		0		0.535	Israel
Italy	23730.9	24079.3	24263.7	24042.1	24554.2	25262.7	25542.1	26005	26374	26752.2	27717.1	28215.9	28254	28021.5	28226.9	28279.9	28737.7	29007.9	28453.6	26729.2	27059.1							0	0	0	0	0		1	0	0	0	0		0		0.442	Italy
Jamaica																7082.61					7082.61	2004	0.0535	0.0899	0.1349	0.2056	0.5161	1894.6	3183.63	4777.22	7280.92	18276.7		1	0	0	0	0		1894.6		0.555	Jamaica			0	0	0	0
Japan	26522.6	27319.3	27474.8	27454	27596.9	28025.7	28683.5	29065	28410.9	28300.5	28889.2	28928.3	28944.6	29369.5	30052.7	30441.3	30960.8	31635.9	31322.7	29625.4	31029.7							0	0	0	0	0		1	0	0	0	0		0		0.571	Japan
Jordan	3291.53	2997.02	3377.52	3377.47	3410.47	3505.57	3471.11	3477.52	3474.19	3528.14	3588.79	3685.77	3805.62	3867.35	4098.5	4332.88	4578.94	4843.93	5082.05	5243.81	5248.54	2010	0.0771	0.1157	0.1567	0.2146	0.4359	2023.31	3036.28	4112.23	5631.69	11439.2		1	0	0	0	0		2023.31		0.371	Jordan			0	0	0	0
Kazakhstan	7089.13	6270.01	5941.82	5431.08	4816.13	4499.36	4590.87	4743.26	4734.16	4908.51	5405.77	6145.99	6748.02	7350.81	8000.7	8699.1	9528.59	10258.6	10468.8	10318.3	10915.7	2009	0.0912	0.1315	0.1707	0.2225	0.3841	4977.54	7177.05	9316.52	12143.7	20963.5		1	0	0	0	0		4977.54		0.674	Kazakhstan			0	0	0	0
Kenya	1421.11	1394.53	1339.18	1302.19	1296.56	1315.01	1332.21	1303.51	1312.01	1308.07	1281.99	1295.61	1268.19	1270.55	1299.77	1339.96	1387.12	1445.02	1428.45	1428.78	1471.08		0.0484	0.0868	0.132	0.201	0.532	356.002	638.45	970.915	1478.44	3913.08		1	0	0	0	0		356.002		0.603	Kenya			1	0	0	0
Kiribati	1881.46	1767.8	1796.97	1835.41	1900.97	1857.09	1941.87	2018.43	2203.89	2170.32	2336.14	2311.44	2283.12	2332.4	2364.05	2319.97	2179.61	2307.11	2334.88	2284.66	2239.02							0	0	0	0	0		1	0	0	0	0		0			Kiribati
Kuwait						42714.2	42996.5	42693	42041.1	39104.7	39054.2	37861.8	37710	42817.3	45463.7	48096.5	48062.2	47464.7	47107.8	42363.4	39403.1							0	0	0	0	0		1	0	0	0	0		0		0.665	Kuwait
Kyrgyzstan	2523.49	2287.65	1947.33	1645.81	1315.71	1231.99	1299.89	1408.09	1416.07	1446.19	1506.62	1571.81	1557.18	1649.27	1743.93	1721.34	1755.78	1887.68	2026.93	2060.4	2026.37							0	0	0	0	0		1	0	0	0	0		0		0.606	Kyrgyz Republic
Laos	932.528	944.681	968.85	997.733	1050.68	1096.78	1145.69	1197.97	1220.55	1285.69	1337.49	1393.24	1455.73	1523.76	1597.87	1684.39	1796.9	1895.68	2002.11	2108.07	2242.12		0.0764	0.113	0.153	0.209	0.448	856.491	1266.8	1715.22	2343.02	5022.35		1	0	0	0	0		856.491		0.765	Lao PDR			0	0	0	0
Latvia	10108.7	8877.43	6109.67	5920.84	6152.62	6182.02	6489.05	7096.91	7502.49	7919.24	8529.2	9285.58	9955.87	10733.2	11727.8	13040.5	14716.1	16268.7	15647.1	12901.8	12948.3							0	0	0	0	0		1	0	0	0	0		0		0.48	Latvia
Lebanon	6257.49	8492.52	8656.43	9009.98	9489.69	9914	10295.7	9989.55	10277.7	10092.7	9979.67	9996.58	9869.42	9707.09	9990.49	9753.06	9588.08	10157.9	10977.1	11739.5	12288.8		0.0703333	0.111533	0.156867	0.219767	0.4415	4321.57	6853.07	9638.54	13503.4	27127.6		1	0	0	0	0		4321.57		0.425	Lebanon			0	0	0	0
Lesotho	930.53	948.829	997.775	1010.86	1045.35	1048.78	1087.72	1118.03	1125.09	1118.56	1165.53	1204.9	1202.33	1249.94	1269.72	1294.7	1340.32	1392.74	1460.33	1499.39	1602.04	2003	0.0297	0.0721	0.1252	0.2095	0.5635	237.903	577.536	1002.88	1678.14	4513.75		1	0	0	0	0		237.903		0.499	Lesotho			1	0	0	0
Liberia	359.502	313.857	207.493	140.619	109.319	101.598	107.803	206.629	247.799	284.144	338.617	398.712	513.558	339.034	315.606	336.532	356.89	396.762	420.584	459.842	492.56	2007	0.064	0.114	0.157	0.216	0.45	157.619	280.759	386.66	531.965	1108.26		1	0	0	0	0		157.619		0.589	Liberia			1	1	1	0
Libya										12502.7	12756.8	12016.8	11679.1	12997.3	13361.2	14454.4	15059.5	15699.1	16033.1	16129.5	16129.5		0.0735167	0.11665	0.16005	0.219933	0.43	5928.95	9407.55	12907.7	17737.1	34678.5		1	0	0	0	0		5928.95		0.488	Libya			0	0	0	0
Lithuania	12499.7	11770.2	9278.08	7809.48	7095.88	7385.97	7828.05	8475.04	9187.91	9154.02	9518.31	10212.7	10952.1	12126.3	13088.2	14197.3	15402.3	17010.4	17599.6	15088.9	15534.5							0	0	0	0	0		1	0	0	0	0		0		0.483	Lithuania
Luxembourg	42706.9	45781.2	45999.1	47292.2	48435.1	48443.5	48512.7	50753	53379.4	57097.8	61091.2	61888.3	63748.2	64027.1	65882.4	68290.3	70527.1	74021.5	72176	66915.1	67742.5							0	0	0	0	0		1	0	0	0	0		0		0.545	Luxembourg
Macedonia	8097.09	7616	7157.9	6670.37	6586.88	6519.55	6569.43	6608.89	6759.46	6978.69	7233.43	6862.72	6890.12	7062.31	7371.88	7676.83	8048.55	8531.96	8945.12	8855.26	9104.28							0	0	0	0	0		1	0	0	0	0		0		0.378	Macedonia, FYR
Madagascar	1012.72	920.709	903.855	895.073	867.277	855.06	846.373	850.281	856.172	868.318	881.803	906.599	768.033	818.286	836.182	849.467	866.745	894.934	931.989	868.72	849.119	2010	0.0541	0.0948	0.1409	0.2088	0.5014	229.687	402.483	598.205	886.48	2128.74		1	0	0	0	0		229.687		0.858	Madagascar			1	1	0	0
Malawi	567.587	603.694	553.584	604.683	539.947	623.169	656.299	664.758	671.552	672.345	664.315	614.881	609.415	626.545	639.677	639.74	634.15	673.772	708.043	748.97	657.73	2010	0.056	0.095	0.14	0.207	0.502	184.164	312.422	460.411	680.75	1650.9		1	0	0	0	0		184.164		0.768	Malawi			1	1	0	0
Malaysia	6873.68	7329.04	7774.48	8328.54	8868.38	9496.24	10183.5	10655.6	9628.85	9978.36	10619	10448.7	10791.8	11197.8	11733.7	12130.6	12572.8	13122.1	13510	13071.9	13801.4	2009	0.0454	0.0865	0.1372	0.2164	0.5154	3132.91	5969.09	9467.73	14933.1	35566.1		1	0	0	0	0		3132.91		0.571	Malaysia			0	0	0	0
Maldives												4518.59	4710.74	5286.77	5846.77	5248.57	6167.74	6699.07	7382.05	6984.25	7338.73	2004	0.0651	0.1088	0.1571	0.2266	0.4442	2388.76	3992.27	5764.57	8314.78	16299.3		1	0	0	0	0		2388.76		0.58	Maldives			0	0	0	0
Mali	724.249	720.89	762.922	728.004	715.849	740.892	745.391	775.595	801.21	832.461	835.382	909.672	919.603	958.351	949.408	976.066	1026.75	1037.22	1054.65	1067.46	1095.12		0.0797	0.1199	0.1633	0.2241	0.413	436.405	656.524	894.165	1227.08	2261.42		1	0	0	0	0		436.405		0.604	Mali			1	0	0	0
Malta	13674.1	14385.2	14912.7	15433.7	16162.5	17071.9	17609.6	18409.5	19236.2	20046.2	21291	20338.9	20755.4	20646.6	20405.2	21018.6	21350.1	22119.9	22922.6	22204.5	22696.8							0	0	0	0	0		1	0	0	0	0		0		0.473	Malta
Mauritania	1737.86	1720.31	1703.78	1753.08	1651.11	1761.23	1809.9	1686.24	1710.91	1788.57	1728.03	1710.13	1670.03	1717.22	1762.57	1865.26	2154.53	2128.61	2143.69	2061.42	2110.19		0.0602	0.104	0.151	0.215	0.47	635.166	1097.3	1593.19	2268.45	4958.94		1	0	0	0	0		635.166		0.369	Mauritania			0	0	0	0
Mauritius	6104.29	6306.6	6629.52	6884.34	7069.41	7309.4	7639.31	7973.33	8368.9	8478.92	9153.88	9287.67	9403.12	9646.42	10113.2	10157.5	10478.9	11028.2	11561.2	11848.4	12278.6		0.0532	0.09475	0.13915	0.2049	0.508	3266.11	5817	8542.85	12579.5	31187.7		1	0	0	0	0		3266.11		0.542	Mauritius			0	0	0	0
Mexico	10023.4	10231.1	10381.8	10579.9	10856.5	10032.8	10424.5	10951.2	11271.4	11386.7	11810.1	11575.2	11440.2	11459.9	11807.3	12017.1	12462.2	12694.6	12711.3	11962.5	12412.5		0.0493	0.0879	0.133	0.202	0.528	3059.68	5455.28	8254.3	12536.6	32768.9		1	0	0	0	0		3059.68		0.579	Mexico			0	0	0	0
Moldova	4583.06	3839.38	2719.92	2690.18	1864.45	1847.8	1755.23	1787.26	1674.23	1619.87	1657.25	1762.28	1904.15	2035.54	2191.8	2361.95	2481.63	2563.93	2768.27	2605.75	2793.38							0	0	0	0	0		1	0	0	0	0		0		0.38	Moldova
Mongolia	2444.16	2197.69	1971.52	1892.43	1918.16	2024.89	2053.59	2116.14	2168.35	2215.57	2221.07	2265.68	2350.03	2488.8	2722.75	2885.28	3091.78	3361.9	3608.6	3510.31	3677.98	2008	0.071	0.1115	0.1562	0.2209	0.4404	1305.68	2050.47	2872.5	4062.33	8098.91		1	0	0	0	0		1305.68		0.572	Mongolia			0	0	0	0
Montenegro								7485.53	7863.42	7131.02	7354.13	7431.03	7562.33	7737.19	8061.57	8384.47	9090.27	10047.5	10726.1	10102.3	10343.7							0	0	0	0	0		1	0	0	0	0		0		0.408	Montenegro
Morocco	2698.7	2832.51	2671.05	2599.88	2823.08	2596.5	2870.1	2765.65	2936.32	2913.48	2923.98	3109.24	3178.23	3344.91	3471.35	3540.42	3779.25	3845.37	4020.92	4167.55	4268.03		0.0652	0.105	0.145	0.206	0.479	1391.38	2240.71	3094.32	4396.07	10221.9		1	0	0	0	0		1391.38		0.455	Morocco			0	0	0	0
Mozambique	395.041	404.687	371.801	389.257	400.525	397.75	414.681	444.944	480.529	506.478	498.626	542.806	574.334	591.969	626.075	661.864	684.895	715.412	744.424	771.296	805.048	2008	0.0523	0.0947	0.1374	0.201	0.5146	210.52	381.19	553.068	809.074	2071.39		1	0	0	0	0		210.52		0.783	Mozambique			1	1	0	0
Myanmar																					5507.1		0.0677143	0.107914	0.1523	0.217694	0.454514	1864.55	2971.47	4193.66	5994.32	12515.3		1	0	0	0	0		1864.55		0.752	Myanmar			0	0	0	0
Namibia	3985.3	4161.93	4321.1	4109.97	4283.36	4329.11	4333.59	4381.07	4395.94	4428.13	4484.08	4458.71	4607.69	4747.42	5271.26	5341.32	5646.95	5871.02	5982.73	5827.26	6092.03		0.0315	0.0503	0.0824	0.15	0.686	959.494	1532.14	2509.91	4569.02	20895.6		1	0	0	0	0		959.494		0.477	Namibia			0	0	0	0
Nepal	747.246	775.217	786.656	796.023	839.361	846.464	869.268	890.711	895.725	914.033	950.019	975.796	958.821	979.471	1009.03	1028.85	1049.28	1071.87	1124.33	1162.21	1204.53	2010	0.0827	0.122	0.162	0.219	0.415	498.071	734.761	975.666	1318.96	2499.39		1	0	0	0	0		498.071		0.813	Nepal			0	0	0	0
Netherlands	26275.8	26705.4	26956.4	27105.8	27740.7	28464.1	29298.3	30394.9	31393.3	32645.9	33690.8	34081.4	33890.4	33844.1	34481	35104.5	36237.8	37576.7	38105.9	36520.1	36888.3							0	0	0	0	0		1	0	0	0	0		0		0.618	Netherlands
New Zealand	19515.5	18388.9	18399.9	19349.2	20050.6	20584.1	20918.5	21207.2	21295.3	22267.9	22636.8	23309.7	24027.1	24474.3	24960.1	25473.8	25590.5	26228.3	25498	25458.6	25215							0	0	0	0	0		1	0	0	0	0		0		0.632	New Zealand
Nicaragua	2437.09	2375.4	2326.81	2261.43	2282.17	2364	2462.62	2511.39	2558.16	2692.47	2759.04	2799.15	2781.62	2814.58	2926.44	3013.21	3098.72	3213.49	3299.16	3184.95	3255.62	2005	0.0622	0.1021	0.1479	0.2154	0.4724	1012.5	1661.99	2407.53	3506.3	7689.77		1	0	0	0	0		1012.5		0.576	Nicaragua			0	0	0	0
Niger	704.772	699.843	633.18	621.136	624.192	618.427	617.184	611.645	651.183	624.232	593.394	612.875	608.774	618.192	596.662	601.052	612.861	609.099	643.013	614.856	641.547	2008	0.0809	0.1183	0.1577	0.2125	0.4306	259.506	379.475	505.86	681.644	1381.25		1	0	0	0	0		259.506		0.614	Niger			1	1	0	0
Nigeria	1286	1245.9	1220.12	1214.8	1195.62	1162.57	1190.52	1193.67	1195.79	1171.74	1203.48	1225.37	1240.06	1334.12	1738.95	1752.63	1847.19	1921.4	1987.59	2068.33	2170.06		0.044	0.083	0.13	0.203	0.54	477.413	900.574	1410.54	2202.61	5859.15		1	0	0	0	0		477.413		0.514	Nigeria			0	0	0	0
North Korea																					13875.3		0.0634667	0.112167	0.166767	0.225367	0.4389	4403.11	7781.75	11569.7	15635.2	30449.4		1	0	0	0	0		4403.11						0	0	0	0
Norway	32362.7	33209.1	34181.3	34925.3	36481.2	37811.6	39539	41445.8	42305.1	42867.5	43975.9	44624.7	45051.4	45227.2	46741.6	47626.3	48330.3	49101.8	48526.4	47134.8	46773.9							0	0	0	0	0		1	0	0	0	0		0		0.633	Norway
Oman	15131	15412	16024.1	16341.2	16448.8	16907.1	17250.8	18277.1	18817	18783.6	19615.3	20645.1	20538.8	19904.5	19955.8	20273	21115.2	22420.9	25058.9	24671.5	24753.1		0.0718	0.113	0.153	0.21	0.453	8886.37	13985.5	18936.1	25990.8	56065.8		1	0	0	0	0		8886.37		0.548	Oman			0	0	0	0
Pakistan	1631.13	1666.61	1748.17	1733.88	1753.31	1793.27	1831.13	1801.05	1799.28	1819.48	1854.11	1851.92	1875.41	1931.13	2036.92	2153.95	2245.3	2310.41	2306.39	2328.67	2324.34		0.096	0.129	0.164	0.212	0.4	1115.68	1499.2	1905.95	2463.8	4648.67		1	0	0	0	0		1115.68		0.512	Pakistan			0	0	0	0
Palestine																					6949.72							0	0	0	0	0		1	0	0	0	0		0
Panama	5899.54	6322.09	6700.8	6922.69	6975.26	6952.82	7002.14	7302.09	7678.34	7817.64	7869.24	7758	7776.11	7947.24	8383.29	8819.04	9396.41	10345.9	11192.4	11423.5	12067	2010	0.033	0.0775	0.1251	0.2006	0.5638	1991.05	4675.96	7547.9	12103.2	34016.8		1	0	0	0	0		1991.05		0.612	Panama			0	0	0	0
Papua New Guinea	1688.85	1804.99	2004.5	2310.58	2386.35	2248.51	2359.8	2208.45	2069.55	2053.08	1950.4	1898.71	1848.37	1841.83	1845.78	1865.89	1868.19	1955.17	2037.36	2100.07	2217.11	1996	0.0452	0.0774	0.121	0.193	0.564	501.067	858.021	1341.35	2139.51	6252.25		1	0	0	0	0		501.067		0.707	Papua New Guinea			0	0	0	0
Paraguay	4537.79	4577.19	4539.72	4648.96	4781.08	4990.13	4955.29	5052.8	4948.38	4778.7	4572.2	4442.42	4353.18	4452.58	4544.48	4554.3	4685.45	4850.37	5067.22	4780.88	5312.81	2010	0.0326	0.0776	0.1277	0.1978	0.5643	865.988	2061.37	3392.23	5254.37	14990.1		1	0	0	0	0		865.988		0.659	Paraguay			0	0	0	0
Peru	4459.11	4465.18	4360.4	4482.65	4964.98	5296.03	5334.31	5602.99	5474.05	5436.81	5513.57	5447.42	5644.37	5797.48	6012.6	6349.05	6765.48	7288.07	7916.48	7904.27	8502.61	2010	0.0391	0.0834	0.1363	0.2153	0.5259	1662.26	3545.59	5794.53	9153.06	22357.6		1	0	0	0	0		1662.26		0.729	Peru			0	0	0	0
Philippines	2538.4	2462.98	2413.5	2408.24	2457.25	2514.72	2602.72	2677.64	2604.5	2627.38	2685.56	2705.93	2747.22	2826.12	2957.18	3041.06	3143.89	3295	3375.03	3357.5	3553.5	2010	0.0598	0.0942	0.1387	0.2104	0.4969	1062.5	1673.7	2464.35	3738.28	8828.68		1	0	0	0	0		1062.5		0.6	Philippines			0	0	0	0
Poland	8182.09	7581.14	7748	8017.22	8423.76	8997.15	9551.21	10221.3	10726.7	11212.9	11753.4	11959	12137.2	12615.1	13297.1	13784.2	14651.8	15654.5	16454.8	16706.8	17372.3							0	0	0	0	0		1	0	0	0	0		0		0.505	Poland
Portugal	16177.4	16910	17090.7	16720.3	16845.3	17520.7	18117.3	18853.4	19747.5	20465.6	21154.9	21431.9	21438.7	21095.5	21300.4	21369	21606.9	22068	22036.9	21375.7	21779.6							0	0	0	0	0		1	0	0	0	0		0		0.552	Portugal
Qatar											64529.8	64703	67344.1	66475.7	73624.4	69497.7	69949.6	69300.9	69164.8	67313.1	70239.3		0.07565	0.1183	0.16115	0.21925	0.4252	26568	41546.6	56595.3	76999.8	149329		1	0	0	0	0		26568		0.86	Qatar			0	0	0	0
Romania	7852.7	6899.38	6346.53	6451.22	6717.1	7212.62	7523.41	7084.64	6759.33	6688.71	6838.02	7329.35	7819.33	8249.06	8965.53	9361.41	10122.8	10750.5	11620.6	10873.2	10715.1							0	0	0	0	0		1	0	0	0	0		0		0.52	Romania
Russia	12625.6	11961.6	10219	9343.79	8179.43	7850.84	7588.8	7717.77	7328.87	7829.37	8612.66	9073.13	9546.04	10292.1	11088.2	11852.8	12877.7	14016.2	14767.3	13616.2	14181.6							0	0	0	0	0		1	0	0	0	0		0		0.583	Russian Federation
Rwanda	707.105	713.151	804.471	797.589	420.216	574.717	618.93	645.729	634.398	623.103	631.319	657.507	727.447	726.793	766.51	820.176	868.985	910.144	982.551	1013.49	1055.87		0.046	0.0787	0.115	0.174	0.586	242.849	415.483	607.122	918.603	3093.68		1	0	0	0	0		242.849		0.857	Rwanda			1	1	0	0
Saint Lucia	7562.79	7655.67	8090.77	8203.11	8224.05	8391.73	8732.19	8649.45	9074.44	9168.25	9118.87	8588.42	8513.87	8807.5	9448.09	9160.1	9876.8	9877.75	10247.9	10117.1	10032	1995	0.0523	0.0987	0.1481	0.2175	0.4834	2623.37	4950.79	7428.69	10909.8	24247.3		1	0	0	0	0		2623.37						0	0	0	0
Saint Vincent and the Grenadines	5426.49	5444.62	5843.95	5847.95	5670.65	5727.82	5806.95	6582.5	6928.16	7236.29	7194.33	7306.75	7752.62	8325.02	8654.73	8852.59	9517.82	9828.35	9954.7	9729.69	9452.86		0.0523	0.0987	0.1481	0.2175	0.4834	2471.92	4664.99	6999.85	10280	22847.6		1	0	0	0	0		2471.92						0	0	0	0
Samoa	2595.75	2517.38	2489.66	2566.34	2477.69	2618.86	2791.02	2798.5	2852.46	2904.46	3093.27	3294.65	3419.92	3560.96	3708.29	3837.69	3889.21	3933.86	4076.09	3841.82	3829.72		0.062	0.0987	0.141	0.203	0.496	1187.21	1889.97	2699.95	3887.16	9497.7		1	0	0	0	0		1187.21						0	0	0	0
São Tomé and Príncipe												1318.24	1319.67	1379.82	1410.19	1398.23	1432.4	1420	1504.09	1519.56	1543.66	2001	0.0523	0.085	0.1223	0.1769	0.5653	403.668	656.057	943.951	1365.37	4363.17		1	0	0	0	0		403.668						1	0	0	0
Saudi Arabia	18973	20040.1	20331.6	19770.6	19422.2	19073	19424.5	19705.9	20031.1	19538.9	19956.5	19348.3	18544.4	19178.6	19969.5	20680.4	21246.9	22047.6	23496.9	23542.8	24864.4		0.07325	0.115225	0.158725	0.21835	0.434225	9106.57	14325	19733	27145.7	53983.6		1	0	0	0	0		9106.57		0.487	Saudi Arabia			0	0	0	0
Senegal	1427.55	1419.54	1393.77	1370.13	1330.91	1364.35	1356.18	1364.4	1410.45	1463.98	1473.57	1501.87	1472.28	1528.96	1575.33	1619.13	1614.29	1648.18	1662.27	1655.47	1677.62		0.0622	0.1061	0.1532	0.2197	0.4588	521.739	889.976	1285.06	1842.86	3848.45		1	0	0	0	0		521.739		0.687	Senegal			0	0	0	0
Serbia	11601.9	10453.7	7563.82	5220.11	5326.17	5647.89	6112.21	6781.66	6903.03	6152.12	6501.34	6857.69	7143.65	7353.77	8056.45	8517.05	8858.43	9374.71	9772.47	9468.32	9602.43							0	0	0	0	0		1	0	0	0	0		0		0.419	Serbia
Seychelles	13932.2	14164	14988.9	15685.2	15304.6	14931	15404.8	17048.1	18121.3	18110.1	18703.7	18262.9	17948	16995.3	16634.4	18045	19345.6	21252.2	20337.4	20033.4	20640	2007	0.0371	0.0566	0.0832	0.1268	0.6963	3828.72	5841.12	8586.25	13085.8	71858.2		1	0	0	0	0		3828.72			Seychelles			0	0	0	0
Sierra Leone	984.73	1005.26	818.478	838.105	830.079	768.428	783.38	735.725	742.515	715.436	742.883	664.801	802.559	836.931	851.711	855.336	876.156	923.007	951.748	963.684	996.548		0.0609	0.0965	0.1404	0.2093	0.4929	303.449	480.835	699.577	1042.89	2455.99		1	0	0	0	0		303.449		0.649	Sierra Leone			1	0	0	0
Singapore	25234	26115.5	27124.6	29482.7	31594.6	32879.6	33977.7	35651.4	33712.5	35516.7	38063.1	36622.6	37814.2	40134.4	43264.6	45374.2	47768.4	49952.3	48191.3	46391.4	52313.9							0	0	0	0	0		1	0	0	0	0		0		0.651	Singapore
Slovakia	12692.6	10834.4	10102.9	9692.01	10253	10820.4	11547	12037.6	12545.7	12537.7	12726.5	13193.7	13797.9	14455.3	15178.4	16174.8	17510.4	19326.7	20402.9	19353.9	20120.7							0	0	0	0	0		1	0	0	0	0		0		0.505	Slovak Republic
Slovenia	16454.7	14980.7	14183	14621.1	15417.8	15976	16569.1	17413.9	18065.3	19013.8	19766.3	20315.3	21066.6	21670.8	22610.2	23475.6	24769.6	26323.7	27225.5	24819.9	25052.9							0	0	0	0	0		1	0	0	0	0		0		0.55	Slovenia
Solomon Islands	2322.29	2393.31	2621.68	2649.6	2812.34	2959.01	2923.48	2802.34	2774.66	2686.76	2241.9	2008.51	1901.32	1972.93	2017.63	2074.98	2166.32	2342.55	2456.69	2373.36	2484.11		0.0452	0.0774	0.121	0.193	0.564	561.408	961.35	1502.89	2397.16	7005.18		1	0	0	0	0		561.408		0.634	Solomon Islands			0	0	0	0
Somalia																					1467		0.0629	0.105	0.149	0.212	0.472	461.372	770.175	1092.92	1555.02	3462.12		1	0	0	0	0		461.372		0.518	Somalia			0	0	0	0
South Africa	7974.71	7732.46	7410.96	7345.61	7422.84	7490.39	7641.05	7665.86	7526.47	7520.2	7641	7690.99	7863.9	7993.43	8259.3	8596.83	8977.29	9371.99	9604.82	9357.13	9516.45		0.027	0.0463	0.0816	0.163	0.682	1284.72	2203.06	3882.71	7755.91	32451.1		1	0	0	0	0		1284.72		0.387	South Africa			0	0	0	0
South Korea	8768.5	9503.69	9971.07	10488.3	11281.9	12141.6	12868	13340.8	12337	13411.7	14428.8	14891.6	15867.5	16231.5	16917.6	17550.9	18370.5	19218.6	19519.4	19489	20625.1	1998	0.0791	0.1356	0.1795	0.2313	0.3745	8157.23	13983.8	18511	23852.9	38620.5		1	0	0	0	0		8157.23						0	0	0	0
Spain	19776.7	20234	20354.8	20082.3	20505.6	21021.8	21480.2	22252.5	23165.6	24140.3	25147.1	25777.1	26095.4	26459.3	26882	27392	28044.4	28527.1	28353.9	27057.7	26908							0	0	0	0	0		1	0	0	0	0		0		0.472	Spain
Sri Lanka	2029.22	2091.58	2163.69	2284.14	2379.03	2475.97	2542.02	2671.05	2764.39	2842.12	3005.39	3006.96	3105.69	3246.93	3377.57	3550.21	3781.26	4001.79	4202.57	4301.72	4600.87	2010	0.0772	0.1139	0.1533	0.2097	0.4459	1775.94	2620.2	3526.57	4824.02	10257.6		1	0	0	0	0		1775.94		0.523	Sri Lanka			0	0	0	0
Sudan	993.777	1037.57	1072.62	1087.44	1065.4	1096.52	1129.02	1214.48	1232.99	1237.22	1279.95	1325.5	1371.37	1435.96	1449.7	1514.37	1619.81	1755.51	1757.83	1764.95	1777.48		0.0681	0.1165	0.164	0.2273	0.4241	605.233	1035.38	1457.54	2020.11	3769.15		1	0	0	0	0		605.233		0.455	Sudan			0	0	0	0
Suriname	5323.9	5390.91	5305.31	4855.2	4947.07	4934.66	4930.14	5142.68	5152.36	5037.62	4964.55	5117.73	5262.33	5501.05	5930.72	6125.71	6289.76	6543.3	6749.11	6888.34	7113.61	1999	0.0318	0.0723	0.1231	0.2035	0.5693	1131.06	2571.57	4378.42	7238.09	20248.9		1	0	0	0	0		1131.06		0.473	Suriname			0	0	0	0
Swaziland	3895.17	3854.2	3887.84	3929.5	3947.13	4055.13	4120.78	4154.72	4172.02	4215.4	4226.83	4231.83	4277.5	4350.22	4448.74	4517.54	4609.93	4701.14	4732.94	4712.22	4721.84	2010	0.0405	0.0773	0.12	0.2	0.566	956.172	1824.99	2833.1	4721.84	13362.8		1	0	0	0	0		956.172		0.437	Swaziland			0	0	0	0
Sweden	24564.9	24118.4	23699.6	23075.6	23831.6	24640.5	24998	25660.3	26724.5	27948	29145.5	29434.3	30067.2	30655.2	31828	32703	33917	34782.2	34300.6	32299.7	34125.3							0	0	0	0	0		1	0	0	0	0		0		0.58	Sweden
Switzerland	34418.7	33679.9	33296.1	32952.7	33106.1	33043.8	33057.6	33651.5	34469.1	34784	35858.9	36075.7	35870.2	35612.5	36224.9	36963.6	38110.4	39223.9	39566.8	38318.7	39041.6							0	0	0	0	0		1	0	0	0	0		0		0.648	Switzerland
Syria	2937.36	3078.76	3395.56	3472.73	3635.84	3739.63	3796.13	3756.9	3886.66	3653.75	3667.88	3782.45	3936.39	3890.46	4070.08	4205.52	4266.08	4334.85	4355.24	4466.08	4501.74	2004	0.0768	0.1143	0.1553	0.2143	0.4393	1728.67	2572.74	3495.6	4823.61	9888.06		1	0	0	0	0		1728.67		0.398	Syrian Arab Republic			0	0	0	0
Tajikistan	3008.52	2732.86	1903.22	1564.58	1212.79	1047.4	860.871	864.472	898.82	919.577	981.173	1063.51	1157.25	1259.86	1361.62	1422.59	1489.59	1573.35	1660.86	1679.45	1746.42	2009	0.0829	0.1275	0.1701	0.2258	0.3937	723.892	1113.34	1485.33	1971.71	3437.83		1	0	0	0	0		723.892		0.594	Tajikistan			0	0	0	0
Tanzania	858.426	847.904	824.771	807.468	794.496	798.813	812.482	819.726	829.379	848.493	868.498	897.569	937.455	976.049	1024.52	1070.07	1110.26	1155.62	1205.45	1240.44	1288.5		0.068	0.111	0.1565	0.217	0.448	438.091	715.119	1008.25	1398.03	2886.25		1	0	0	0	0		438.091		0.866	Tanzania			1	0	0	0
Thailand	3967.39	4261.62	4568.02	4910.14	5312.85	5755.14	6035.61	5889.08	5209.9	5378.03	5568.41	5623.63	5855.02	6205.9	6538.86	6790.7	7101.4	7437.83	7610.12	7422.5	7987.18	2010	0.0676	0.105	0.1462	0.2145	0.4667	2699.67	4193.27	5838.63	8566.25	18638.1		1	0	0	0	0		2699.67		0.717	Thailand			0	0	0	0
The Bahamas	28945.7	27229.2	25696	25298.9	25649.5	26368.2	27130.4	27384.2	28371.1	30033.7	30826.4	31088	31305.4	30264.6	29890.1	30276.9	30434.7	30294.8	29056.3	27359.9	27169.9		0.0391	0.08465	0.1301	0.2002	0.54595	5311.72	11499.7	17674	27197.1	74167.1		1	0	0	0	0		5311.72						0	0	0	0
The Gambia	1604.93	1597.86	1600.94	1602.42	1561.02	1531.69	1522.63	1553.22	1562.81	1615.63	1654.94	1698.64	1593.15	1649.73	1710.99	1642.24	1609.41	1616.51	1656.59	1708.91	1763.78		0.0479	0.0856	0.132	0.206	0.528	422.425	754.898	1164.09	1816.69	4656.38		1	0	0	0	0		422.425						1	0	0	0
Timor-Leste										932.66	1053.4	1200.58	1085.3	1023.01	991.247	1038.75	974.711	1055.08	1173.71	1285.2	1367.26		0.0763	0.1133	0.1557	0.2182	0.4365	521.608	774.551	1064.41	1491.68	2984.04		1	0	0	0	0		521.608		0.371	Timor-Leste			0	0	0	0
Togo	933.91	903.492	846.271	701.437	787.422	828.784	879.903	981.36	934.633	933.531	902.65	865.292	835.319	854.151	849.807	837.743	849.366	846.639	843.41	850.715	862.041		0.0762	0.1174	0.1609	0.2215	0.424	328.438	506.018	693.512	954.71	1827.53		1	0	0	0	0		328.438		0.746	Togo			1	0	0	0
Tonga	2980.63	3166.65	3170.57	3285.06	3442.28	3562.01	3551.64	3533.89	3614.36	3736.71	3842.72	3959.22	4070.54	4132.97	4147.71	4219.59	4124.9	3928.25	3938.37	4041.95	4154.85		0.062	0.0987	0.141	0.203	0.496	1288	2050.42	2929.17	4217.17	10304		1	0	0	0	0		1288			Tonga			0	0	0	0
Trinidad and Tobago	10767.1	10983.9	10736.8	10522.4	10845.7	11232.5	11644.6	11937.6	12846	13386.1	14171.3	14701	15812.2	18007.9	19332.5	20343.6	23023.4	23997.2	24690.3	23497.6	23447.8	1992	0.0551	0.1033	0.1553	0.2274	0.4589	6459.86	12110.8	18207.2	26660.1	53800.9		1	0	0	0	0		6459.86		0.6	Trinidad and Tobago			0	0	0	0
Tunisia	4467.54	4550.57	4806.56	4816.78	4880.8	4916.33	5191.28	5399.06	5585.64	5847.02	6053.52	6278.4	6320.9	6632.59	6971.97	7182.37	7492.73	7892.37	8173.72	8333.68	8494.59	2010	0.0674	0.1154	0.1623	0.2275	0.4292	2862.68	4901.38	6893.36	9662.6	18229.4		1	0	0	0	0		2862.68		0.41	Tunisia			0	0	0	0
Turkey	8108.6	8030.67	8298.46	8791.96	8250.56	8762.33	9263.31	9811.75	9885.01	9408.76	9898.15	9199.39	9627.94	9994.09	10781.5	11532.5	12168.8	12577.4	12504.3	11754.2	12671.1	2010	0.0553	0.1056	0.1557	0.2235	0.4599	3503.56	6690.35	9864.46	14160	29137.2		1	0	0	0	0		3503.56		0.427	Turkey			0	0	0	0
Turkmenistan	6114.92	5671.95	4686.89	4626.17	3729.08	3384.15	3543.47	3090.06	3264.8	3757.22	3916.94	4041.88	4009.63	4098.06	4258.23	4761.85	5224.93	5735.01	6498.73	6810.09	7343.65	1998	0.0614	0.1015	0.1473	0.2151	0.4747	2254.5	3726.9	5408.6	7898.1	17430.2		1	0	0	0	0		2254.5		0.537	Turkmenistan			0	0	0	0
Uganda	567.959	578.99	578.629	606.097	624.012	673.788	712.018	725.396	737.732	772.484	771.553	785.269	825.691	849.823	877.319	901.767	965.849	1012.43	1064.24	1103.7	1129.8		0.0584	0.0964	0.1376	0.2003	0.5073	329.9	544.562	777.299	1131.49	2865.73		1	0	0	0	0		329.9		0.745	Uganda			1	0	0	0
Ukraine	8062.6	7369.08	6635.24	5688.15	4405.42	3898.65	3540.06	3465.29	3429.97	3455.54	3696.44	4077.3	4332.16	4777.99	5396.92	5583.4	6031.63	6547.08	6734.03	5762.92	6028.87							0	0	0	0	0		1	0	0	0	0		0		0.539	Ukraine
United Arab Emirates	73588.8	70273.2	68836.5	66150.1	67195.1	68201.4	68520	70205.7	66715.5	65326.7	69241	67839.2	67510	70283.9	70916.2	65573.1	61326.4	53233.5	46889	40637.1	36480.4		0.0643	0.1091	0.1554	0.2196	0.4516	11728.5	19900.1	28345.3	40055.5	82372.8		1	0	0	0	0		11728.5		0.75	United Arab Emirates			0	0	0	0
United Kingdom	22421.3	22063.2	22288.5	23011.2	24089.7	24875	25678	26726.1	27598.9	28315.3	29445.1	29978.8	30554.3	31632.6	32471.9	33323.9	34032.2	34972.9	34473.8	32470.5	32765.5							0	0	0	0	0		1	0	0	0	0		0		0.57	United Kingdom
United States	32965.4	32504.2	33196.2	33660.6	34592.5	35112.3	36023.6	37189.7	38394.3	39795.5	40965	40946.4	41288.8	42077.9	43273.7	44313.6	45058.6	45431	44872.7	43234.5	43952.4							0	0	0	0	0		1	0	0	0	0		0		0.574	United States
Uruguay	7299.55	7504.79	8041.7	8195.12	8727.66	8539.57	8951.49	9648.41	10019.7	9774.28	9551.13	9167.63	8456.91	8530.37	8961.52	9626.21	10005.5	10633.9	11361.3	11576.5	12569.1							0	0	0	0	0		1	0	0	0	0		0		0.61	Uruguay
Uzbekistan	2002.21	1950.33	1691.76	1615.71	1501.92	1461.75	1458.44	1505.62	1545.29	1594.46	1632.3	1679.47	1725.4	1777.06	1891.94	2000.97	2121	2289.67	2455.99	2610.5	2753.56	2003	0.0714	0.1152	0.1567	0.2148	0.4419	983.021	1586.05	2157.41	2957.32	6083.99		1	0	0	0	0		983.021		0.539	Uzbekistan			0	0	0	0
Vanuatu	3463.23	3473.73	3461.32	3387.54	3595.45	3544.89	3552.14	3658.48	3750.06	3694.73	3835.04	3618.6	3351.05	3407.06	3452.87	3544.97	3750.42	3848.66	3998.82	4033.81	4004.83		0.062	0.0987	0.141	0.203	0.496	1241.5	1976.39	2823.41	4064.91	9931.99		1	0	0	0	0		1241.5			Vanuatu			0	0	0	0
Venezuela	9578.43	10261.9	10635.1	10428.2	9963.63	10139.1	9910.58	10329.8	10156.1	9365.37	9526.64	9666.66	8649.53	7835.35	9104.38	9869.17	10658	11396.1	11799.4	11236.7	10894							0	0	0	0	0		1	0	0	0	0		0		0.593	Venezuela, RB
Vietnam	1013.96	1054.82	1125.8	1195.82	1279.83	1379.13	1484	1580.14	1645.77	1698.66	1789.78	1876.69	1972.29	2084	2214.39	2353.88	2490.34	2639.13	2759.03	2877.44	3030.3	2008	0.0742	0.1152	0.1581	0.2184	0.4341	1124.24	1745.45	2395.45	3309.09	6577.26		1	0	0	0	0		1124.24		0.749	Vietnam			0	0	0	0
Yemen	1836.73	1858.64	1909.96	1887.14	1920.28	1945.18	1962.12	1999.38	2058.55	2077.17	2144.27	2163.19	2185.16	2204.05	2229.52	2292.59	2305.52	2323.95	2350.85	2383.95	2507.41		0.0718	0.113	0.153	0.21	0.453	900.16	1416.69	1918.17	2632.78	5679.28		1	0	0	0	0		900.16		0.395	Yemen, Rep.			0	0	0	0
Zambia	1251.05	1220.46	1171.46	1222.34	1090.69	1034.04	1077.59	1083.67	1034.94	1029.82	1038.41	1061.78	1069.83	1096.9	1127.19	1156.82	1196.58	1235.91	1274.16	1312.35	1370.47		0.0358	0.0663	0.104	0.175	0.622	245.315	454.312	712.646	1199.16	4262.17		1	0	0	0	0		245.315		0.691	Zambia			1	1	0	0
Zimbabwe	678.552	697.99	620.708	614.392	658.339	647.442	702.052	708.92	718.418	703.612	675.6	680.801	617.593	511.331	480.878	452.789	436.644	420.169	344.742	362.4	391.55		0.0463	0.0814	0.122	0.193	0.557	90.6439	159.361	238.846	377.846	1090.47		1	0	0	0	0		90.6439		0.827	Zimbabwe			1	1	1	1
WOMEN
Afghanistan													760.825	792.472	770.744	827.849	847.564	937.753	947.071	1118.19	1183.05		0.094	0.136	0.174	0.221	0.375	556.031	804.471	1029.25	1307.26	2218.21		1	0	0	0	0		556.031		0.44				0	0	0	0
Albania	3731.69	2617.74	2438.36	2695.57	2947.69	3366.1	3690.9	3324.1	3752.87	4141.26	4461.05	4800.72	4973.98	5296.79	5649.74	5997.9	6330.59	6732.37	7272.84	7525.78	7791.76							0	0	0	0	0		1	0	0	0	0		0		0.473
Algeria	5861.82	5650.65	5618.35	5378.78	5220.04	5314.39	5434.08	5403.29	5591.34	5686.16	5730.07	5914.06	6164.18	6521.82	6709.17	7000.5	7006.79	7123.26	7137.94	7128.01	7249.23		0.0697	0.116	0.162	0.226	0.426	2526.36	4204.55	5871.88	8191.63	15440.9		1	0	0	0	0		2526.36		0.388				0	0	0	0
Angola	3031.31	2905.28	2618.77	1907.88	1912.22	2048.05	2213.96	2325.47	2418.27	2427.68	2426.4	2447.89	2692.41	2735.48	2927.6	3343.43	3900.41	4622.25	5088.1	5042.32	5048.11		0.054	0.096	0.145	0.218	0.486	1362.99	2423.09	3659.88	5502.44	12266.9		1	0	0	0	0		1362.99		0.644				0	0	0	0
Antigua and Barbuda	14733.4	14911.5	14795.7	15248.5	15803.6	14744.9	15313.9	15620.2	15874.9	16130.3	16602.1	15814.4	16057.1	16929.5	17584.2	18468.1	20741.7	22488.2	22244	19293.5	17610.2	1993	0.0523	0.0987	0.1481	0.2175	0.4834	4605.07	8690.64	13040.4	19151.1	42563.9		1	0	0	0	0		4605.07						0	0	0	0
Argentina	7462.31	8293.29	9160.16	9575.23	10005.2	9599.47	10006.2	10688.5	10971.4	10482.3	10290.1	9738.71	8596.05	9271.2	10019.1	10842.7	11657.8				11657.8		0.0438	0.0931	0.1478	0.2217	0.4936	2553.06	5426.71	8615.13	12922.7	28771.5		1	0	0	0	0		2553.06		0.558				0	0	0	0
Armenia	2937.89	2618.38	1551.47	1448.46	1563.67	1706.19	1834.58	1917.12	2073.39	2155.06	2295.36	2527.98	2873.49	3288.8	3645.53	4165.79	4734.44	5408.85	7467.32	6430.85	6582.66		0.0882	0.1279	0.1651	0.2141	0.4047	2902.95	4209.61	5433.99	7046.74	13320		1	0	0	0	0		2902.95		0.499				0	0	0	0
Australia	23865.2	23480.2	23296.4	24017.9	24727.2	25404.9	26074.7	26790.3	27712	28754.6	29506.6	29664.4	30451.2	31025.5	31939.8	32525.6	33024.4	33756.8	34425.4	34359.1	34620.9							0	0	0	0	0		1	0	0	0	0		0		0.621
Austria	25437.5	26051.5	26305.8	26227.2	26754	27425.8	28064.4	28679.9	29732.9	30725.4	31775.7	31925.7	32307.1	32428.5	33062.5	33626.4	34688.3	35834.6	36191.7	34690.5	35201.2							0	0	0	0	0		1	0	0	0	0		0		0.579
Azerbaijan	4753.93	4647.93	3543.41	2683.8	2126.15	1853.79	1859.03	1947.97	2122.52	2259.67	2489.95	2715.34	2980.84	3289.68	3593.63	4496.14	5981.24	7395.16	8021.57	8596.12	8906.8		0.0799	0.1209	0.1616	0.2168	0.4208	3558.27	5384.16	7196.69	9654.97	18739.9		1	0	0	0	0		3558.27		0.609				0	0	0	0
Bahrain	17799.3	19266	20039.5	22071.4	21476.7	21744.2	22014.4	22022.7	22325.1	22435.8	22658.8	22666.2	22757.9	23147.7	23000.7	23130.7	22826.9	22780.7	22400	21631.1	21487.7	2005	0.0643	0.1091	0.1554	0.2196	0.4516	6908.3	11721.5	16696	23593.5	48519.3		1	0	0	0	0		6908.3		0.653				0	0	0	0
Bangladesh	732.371	739.281	759.293	776.98	791.684	813.35	833.345	860.357	887.342	912.733	949.339	982.003	1008.32	1044.7	1094.1	1143.87	1205.11	1268.66	1333.42	1395.52	1464.32		0.0888	0.124	0.161	0.213	0.414	650.159	907.88	1178.78	1559.5	3031.15		1	0	0	0	0		650.159		0.675				0	0	0	0
Barbados	19756.5	19119.3	18112.6	18239.1	18911.6	19140.6	19438.5	20625.1	21411.5	21896.4	22318.7	21659.9	21706.2	22026.7	22230.6	23004	24196.8	24480.6	24444.5	23317.4	23260.6							0	0	0	0	0		1	0	0	0	0		0		0.635
Belarus	6434.06	6353.73	5731.41	5283.92	4671.18	4198.92	4330.94	4845.17	5277.2	5475.12	5810.04	6131.78	6482.28	6987	7840.61	8640.33	9562.58	10437.3	11545.6	11590	12504.8							0	0	0	0	0		1	0	0	0	0		0		0.495
Belgium	25096.5	25461.7	25746.8	25399.7	26138.7	26706	27033.6	27975.5	28454.3	29394.2	30399	30539.3	30816.1	30934.9	31809.9	32189.4	32830.4	33529.9	33593.8	32391.3	32842.4							0	0	0	0	0		1	0	0	0	0		0		0.494
Belize	4208.51	4557.54	5013.7	5233.7	5140.21	5057.98	4999.48	5031.98	5067.18	5350.98	5878.16	6006.53	6149.26	6551.71	6683.07	6707.53	6844.78	6753.07	6837.44	6687.53	6776.44	1999	0.0327	0.0859	0.1124	0.1938	0.5752	1107.95	2910.48	3808.36	6566.37	19489		1	0	0	0	0		1107.95		0.599				0	0	0	0
Benin	1100.03	1106.41	1097.69	1119.25	1101.54	1129.32	1141.79	1172.16	1184.12	1211.46	1232.18	1268.02	1281.25	1287.42	1284.51	1279.39	1286.32	1305.05	1329.95	1325.89	1321.27		0.07	0.108	0.15	0.21	0.461	462.445	713.487	990.954	1387.33	3045.53		1	0	0	0	0		462.445		0.72				0	0	0	0
Bhutan	1801.94	1797.39	1903.57	1975.97	2104.09	2263.92	2373.65	2460.16	2544.18	2672.88	2778.42	2920.77	3139.17	3281.46	3378.96	3527.67	3683.49	4255.57	4371.95	4584.08	5030.86	2007	0.0664	0.1079	0.1538	0.2204	0.4515	1670.25	2714.15	3868.73	5544.01	11357.2		1	0	0	0	0		1670.25		0.691				0	0	0	0
Bolivia	3012.78	3097.28	3074.66	3131.44	3202.49	3276.97	3344.73	3434.94	3531.7	3473.39	3488.05	3475.67	3491.86	3517.55	3596.22	3688.15	3799	3907.1	4080.85	4150.6	4252.44	2008	0.0213	0.068	0.1191	0.1985	0.5931	452.885	1445.83	2532.33	4220.55	12610.6		1	0	0	0	0		452.885		0.698				1	0	0	0
Bosnia and Herzegovina					1254.47	1574.97	3006.28	3982.51	4471.24	4755.26	4909.04	5065.6	5309.14	5524.05	5874.68	6179.37	6570.4	7031.47	7426.9	7225.29	7290.09							0	0	0	0	0		1	0	0	0	0		0		0.329
Botswana	7875.45	8221.65	8227.23	8160.78	8240.28	8604.67	8895.44	9398.62	9271.8	9974.92	9996.71	9864.56	10315.1	10653.1	10810.8	11176.4	11937.8	12844	13217.2	12068.5	12988.4		0.0313	0.0581	0.0964	0.164	0.65	2032.68	3773.13	6260.4	10650.5	42212.3		1	0	0	0	0		2032.68		0.629				0	0	0	0
Brazil	7174.98	7163.55	7017.37	7231.85	7501.92	7714.33	7760.28	7900.45	7784.48	7689.4	7905.65	7898.11	7998.26	7984.97	8337.67	8502.32	8745.05	9187.14	9572.94	9456.43	10079.3		0.0285	0.0713	0.124	0.19	0.586	1436.3	3593.27	6249.16	9575.32	29532.3		1	0	0	0	0		1436.3		0.645				0	0	0	0
Brunei	49451	49578.2	50485.3	49241.6	49426.4	50303.9	50467.4	48538.7	47155.3	47503.3	47782	48034.4	48843.9	49233.1	48501.1	47760	48944.6	48153.7	46419.6	44862.2	45319.3							0	0	0	0	0		1	0	0	0	0		0		0.625
Bulgaria	7524.17	6957.3	6520.98	6475.91	6616.07	6835.68	6250.57	6185.26	6529.37	6695.05	7111.7	7548.89	8056.18	8548.06	9170.47	9809.4	10502.5	11231.9	11985.2	11383.1	11505.8							0	0	0	0	0		1	0	0	0	0		0		0.479
Burkina Faso	709.495	753.405	735.094	740.208	729.765	750.585	810.551	838.124	874.537	913.138	903.885	936.14	956.251	1001.33	1016.06	1072.18	1111.59	1118.28	1148.87	1148.82	1204.5		0.0672	0.1058	0.1479	0.2087	0.4704	404.713	637.182	890.73	1256.9	2832.99		1	0	0	0	0		404.713		0.808				1	0	0	0
Burundi	688.563	704.876	695.909	639.331	603.907	547.349	496.796	483.133	499.952	487.523	474.002	472.07	479.164	458.536	464.928	453.439	461.683	467.18	473.922	473.748	475.384		0.09	0.119	0.154	0.21	0.428	213.923	282.854	366.046	499.153	1017.32		1	0	0	0	0		213.923		0.758				1	1	1	0
Cambodia				773.917	815.775	841.006	860.832	884.848	906.16	990.754	1054.48	1116.43	1168.91	1246.27	1352.66	1508.14	1646.1	1788.84	1882.09	1856.59	1937.07		0.0793	0.114	0.153	0.21	0.445	768.05	1104.13	1481.86	2033.93	4309.99		1	0	0	0	0		768.05		0.811				0	0	0	0
Cameroon	2100.8	1962.26	1846.98	1737.32	1646.66	1654.27	1689.99	1728.78	1768.01	1797.42	1824.22	1857.28	1882.06	1907.76	1927.83	1921.79	1933.17	1937.5	1956.82	1942.92	1957.22		0.067	0.105	0.149	0.217	0.462	655.668	1027.54	1458.13	2123.58	4521.18		1	0	0	0	0		655.668		0.672				0	0	0	0
Canada	26941.2	26021.1	25928.6	26246.1	27243.9	27778	27925.3	28799.4	29721	31106.7	32446.8	32693.9	33349.5	33640	34343.7	35033.4	35730.4	36126.7	35949.6	34529.7	35222.5							0	0	0	0	0		1	0	0	0	0		0		0.613
Cape Verde	1018.16	1010.4	1092.86	1155.98	1340.93	1493.27	1624.82	1767.55	1949.71	2127.39	2385.9	2393.77	2473.77	2534.04	2753.29	2912.41	3123.47	3584.13	3815.1	3891.66	4018.99	2002	0.0454	0.0791	0.1227	0.1938	0.559	912.312	1589.51	2465.65	3894.41	11233.1		1	0	0	0	0		912.312						0	0	0	0
Central African Republic	754.022	733.055	669.953	656.205	672.124	704.006	660.796	680.695	697.733	708.395	677.699	695.394	708.455	659.298	687.343	681.8	720.664	765.011	779.933	833.248	871.445		0.034	0.069	0.111	0.18	0.606	148.146	300.649	483.652	784.301	2640.48		1	0	0	0	0		148.146		0.727				1	1	0	0
Chad	1037.62	1091.16	1141.97	932.626	994.761	974.628	963.635	984.415	1017.28	975.161	931.854	1001.9	1045.84	1154.54	1486.33	1683.11	1638.01	1638.21	1636.75	1654.68	1822.87		0.063	0.104	0.15	0.218	0.466	574.204	947.892	1367.15	1986.93	4247.28		1	0	0	0	0		574.204		0.661				0	0	0	0
Chile	6913.58	7330.04	8079.9	8488.39	8817.3	9595.37	10150.5	10668.1	10866.7	10647.6	10990.3	11224	11336.6	11655.4	12227.6	12773.4	13201.3	13745.7	14061.4	13784.2	14443.4	2009	0.0426	0.0794	0.1174	0.1836	0.577	3076.44	5734.02	8478.26	13259	41669.1		1	0	0	0	0		3076.44		0.554				0	0	0	0
China	1100.66	1185.63	1337.5	1507.32	1685.62	1849.15	2012.86	2177.65	2325.09	2480.23	2667.47	2867.96	3108.05	3397.63	3718.64	4114.57	4611.3	5238.68	5712.25	6206.82	6819.32		0.0467	0.0974	0.153	0.232	0.471	1592.31	3321.01	5216.78	7910.41	16059.5		1	0	0	0	0		1592.31		0.678				0	0	0	0
Colombia	6077.7	6097.05	6283.46	6313.11	6559.69	6776.71	6793.03	6902.73	6822.06	6424.31	6596.65	6598.07	6655.37	6807.84	7060.36	7280.29	7651.42	8058.64	8223.49	8240.76	8449.59	2010	0.03	0.0683	0.1123	0.1879	0.6015	1267.44	2885.53	4744.44	7938.39	25412.1		1	0	0	0	0		1267.44		0.593				0	0	0	0
Comoros	1281.52	1183.2	1253.56	1260.59	1165.6	1178.56	1134.95	1151.57	1137.3	1130.15	1117.36	1125.45	1142.52	1141.11	1109.41	1126.8	1111.57	1088.41	1071	1062.88	1057.71	2004	0.0255	0.0535	0.0894	0.1514	0.6802	134.858	282.937	472.796	800.686	3597.27		1	0	0	0	0		134.858		0.533				1	1	0	0
Congo	3565.69	3556	3554.75	3429	3155.71	3193.65	3239.07	3128.52	3154.46	2989.14	3131.5	3170.03	3236.45	3185.45	3214.53	3371.94	3480.26	3322.95	3401.68	3547.15	3748.22		0.05	0.084	0.13	0.205	0.531	937.056	1574.25	2436.34	3841.93	9951.53		1	0	0	0	0		937.056		0.656				0	0	0	0
Costa Rica	6222.09	6225.54	6632.25	6954.59	7109.09	7208.09	7091.74	7300.22	7717.98	8154.4	8115.65	8031.53	8102.41	8461.54	8665.75	9019.11	9649.33	10250	10368.5	10110	10455.7	2009	0.0385	0.08	0.1241	0.1987	0.5587	2012.73	4182.3	6487.79	10387.8	29208.1		1	0	0	0	0		2012.73		0.581				0	0	0	0
Côte d’Ivoire	1973.91	1909.43	1842.85	1780.95	1740.29	1809.41	1893.99	1947.76	1988.21	1973	1861.24	1828.11	1774.42	1722.56	1729.47	1726.06	1711.45	1713	1723.06	1754.87	1761.36		0.056	0.1007	0.149	0.218	0.4763	493.181	886.845	1312.21	1919.88	4194.68		1	0	0	0	0		493.181		0.646				0	0	0	0
Croatia						9925.11	10922.1	11438.3	11848.4	11588.3	12370.7	12782.5	13406.1	14126.1	14712.6	15331.9	16095.8	16925.5	17286.1	16103.3	15917.3							0	0	0	0	0		1	0	0	0	0		0		0.46
Cuba	3635.51	3221.25	2828.87	2393.82	2398.29	2445.26	2625.24	2687.7	2682.24	2838.64	2996.63	3081.73	3115.54	3223.94	3401.69	3776.47	4228.75	4535.62	4724.57	4796.23	4913.85		0.0481667	0.0882333	0.134367	0.207233	0.522	1183.42	2167.83	3301.29	5091.56	12825.1		1	0	0	0	0		1183.42		0.552				0	0	0	0
Cyprus	18091.4	17759.5	18918.8	18596.7	19290.8	20099.8	20147.7	20330.6	21095.7	21872	22731.9	23393.5	23587	23630.3	24062	24408.1	24929.6	25826.6	26456.3	25789.9	25198							0	0	0	0	0		1	0	0	0	0		0		0.603
Czech Republic	16361	14495.4	14407.2	14401.2	14814.8	15746.2	16480.1	16357.3	16334.1	16625.4	17340.8	17940.4	18382.8	19070.5	19958	21264.4	22683.4	23833.5	24359.5	23122.2	23619.7							0	0	0	0	0		1	0	0	0	0		0		0.541
Democratic Republic of the Congo	657.95	580.232	498.965	414.973	384.541	375.244	361.844	334.114	322.235	302.236	274.996	262.414	264.114	271.432	281.1	294.386	302.079	312.018	322.038	322.037	335.679		0.055	0.092	0.138	0.209	0.506	92.3119	154.413	231.619	350.785	849.269		1	0	0	0	0		92.3119		0.667				1	1	1	1
Denmark	25442.2	25706.2	26127.5	26017.3	27362.3	28054.4	28686.8	29481.6	30009.4	30676.1	31652.5	31761.6	31807.8	31843.2	32490.4	33193.2	34207.4	34595.3	34123	32017.7	32378.6							0	0	0	0	0		1	0	0	0	0		0
Djibouti	2607.47	2403.59	2339.07	2141.58	2086.1	1979.35	1864.5	1818.3	1788.83	1797.68	1777.11	1786.7	1807.12	1838.65	1882.35	1914.98	1978.97	2050.87			2050.87		0.0603	0.105	0.152	0.218	0.465	618.339	1076.71	1558.66	2235.45	4768.28		1	0	0	0	0		618.339						0	0	0	0
Dominican Republic	3806.71	3766.1	4080.33	4290.95	4307.88	4462.74	4698.19	4989.48	5252.73	5516.5	5737.36	5750.96	5991.26	5886.45	5875.55	6326.36	6901.07	7380.22	7660.4	7817.5	8312		0.0467	0.0859	0.1315	0.2081	0.5278	1940.85	3570.01	5465.14	8648.64	21935.4		1	0	0	0	0		1940.85		0.568				0	0	0	0
Ecuador	6264.86	6384.22	6373.09	6356.01	6483.59	6488.83	6463.34	6604.69	6682.71	6239.3	6183.57	6307.18	6440.02	6490.95	6894.51	7128.62	7311.78	7343.67	7679.19	7594.98	7691.75		0.0429	0.0823	0.1289	0.2071	0.5379	1649.88	3165.15	4957.33	7964.81	20687		1	0	0	0	0		1649.88		0.646				0	0	0	0
Egypt	3266.44	3241.21	3327.85	3370.28	3450.43	3555.33	3675.3	3817.48	3910.19	4084.34	4235.99	4316.07	4347.31	4413.16	4518.34	4642.37	4877.65	5136.2	5411.73	5570.64	5759.76		0.0924	0.13	0.164	0.21	0.403	2661.01	3743.85	4723.01	6047.75	11605.9		1	0	0	0	0		2661.01		0.442				0	0	0	0
El Salvador	3664.11	3738.44	3957.82	4184.06	4374.36	4597.27	4628.39	4784.98	4930.84	5071.84	5154.95	5219.83	5321.56	5424.94	5506.21	5681.51	5880.37	6079.98	6128.6	5906.15	5953.33		0.0371	0.0883	0.137	0.2067	0.5309	1104.34	2628.4	4078.03	6152.77	15803.1		1	0	0	0	0		1104.34		0.575				0	0	0	0
Equatorial Guinea	1999.26	1912.26	2046.82	2103.27	2137.86	2363.57	2954.98	4898.65	5784.75	7927.7	8639.47	13681.8	15846.5	17513.1	23448.9	24981.8	20342.1	24096.2	27346.4	26805.5	25619.2		0.0595	0.0968333	0.141633	0.2104	0.491633	7621.72	12404	18142.7	26951.4	62976.3		1	0	0	0	0		7621.72		0.799				0	0	0	0
Eritrea			430.155	486.177	585.62	594.957	637.768	671.399	663.184	641.073	598.239	624.879	616.604	574.603	558.831	550.953	526.002	515.606	450.271	452.938	448.1		0.069	0.115	0.16	0.22	0.436	154.595	257.658	358.48	492.91	976.859		1	0	0	0	0		154.595		0.777				1	1	1	0
Estonia						7938.07	8530.55	9641.1	10397	10448	11512.5	12284.2	13142.7	14216.5	15166.1	16548	18253.4	19648.4	18846.8	16194.6	16611.3							0	0	0	0	0		1	0	0	0	0		0		0.51
Ethiopia	543.09	487.082	429.455	469.213	468.024	480.818	524.098	524.74	492.215	503.064	518.538	545.613	538.108	511.551	564.692	614.014	662.082	718.207	774.692	820.859	879.042		0.0926	0.1322	0.1678	0.2133	0.3941	406.997	581.047	737.516	937.499	1732.15		1	0	0	0	0		406.997		0.794				1	0	0	0
Federated States of Micronesia	1969.01	2062.39	2089.81	2205.03	2149.4	2269.59	2183.01	2047.5	2113.28	2151.02	2257.09	2302.1	2319.96	2366.01	2294.74	2352.64	2360.17	2324.52	2278	2311.31	2378.12							0	0	0	0	0		1	0	0	0	0		0
Fiji	3433.89	3309.95	3468.78	3493	3619.65	3662.67	3794.16	3671.15	3683.95	3977.13	3886.45	3949.32	4068.03	4103.75	4311.9	4323.66	4374.1	4298.83	4299.69	4202.02	4167.19	2009	0.062	0.0987	0.1407	0.2027	0.4959	1291.83	2056.51	2931.62	4223.45	10332.6		1	0	0	0	0		1291.83		0.503				0	0	0	0
Finland	23141	21634.1	20763.2	20495.4	21152.9	21907.3	22615	23947.1	25085.2	26005.2	27332.8	27893.5	28336.3	28837.7	29940.2	30707.9	31939.5	33500.8	33443	30441.5	31321.7							0	0	0	0	0		1	0	0	0	0		0		0.552
France	24211.7	24401.6	24639.3	24368.9	24823.9	25240.6	25419.9	25883.2	26659.2	27395.5	28209.9	28519.5	28576	28629.6	29142.9	29452.5	29969.5	30465.5	30271.4	29168.4	29521.7							0	0	0	0	0		1	0	0	0	0		0		0.509
Gabon	14665.4	15148.5	14294	14470.8	14620.1	14953.8	15101.4	15564.9	15704.3	13950	13356.6	13317.8	12972	12984.9	12853.9	12931.8	12774.9	13163.1	12976.8	12299.3	12810.8	2005	0.0616	0.1012	0.1454	0.21	0.4818	3945.72	6482.26	9313.44	13451.3	30861.2		1	0	0	0	0		3945.72		0.479				0	0	0	0
Georgia	6138.17	4809.07	2629.35	1844.72	1669.7	1759.29	2006.29	2258.68	2351.8	2438.19	2502.23	2641.55	2804.94	3135.34	3327.13	3610.49	3916.4	4409.47	4516.24	4319.02	4545.9	2010	0.0503	0.0994	0.151	0.2232	0.4761	1143.29	2259.31	3432.16	5073.23	10821.5		1	0	0	0	0		1143.29		0.535				0	0	0	0
Germany	25881.1	27005.6	27313.5	26862.6	27431.3	27809.4	27948.3	28392.3	28916.5	29438.6	30297.6	30704.7	30656.3	30524.3	30885.4	31114.5	32302.2	33402.8	33828.9	32169.6	33511.7							0	0	0	0	0		1	0	0	0	0		0		0.551
Ghana	917.315	939.164	948.569	967.342	972.843	987.371	1008.26	1026.69	1051	1072.44	1086.09	1102.11	1123.01	1151.42	1184.75	1222.46	1267.29	1314.54	1389.32	1409.31	1486.31	2006	0.052	0.0984	0.1473	0.2164	0.4855	386.441	731.266	1094.67	1608.19	3608.02		1	0	0	0	0		386.441		0.664				1	0	0	0
Greece	17325	17689	17617.7	17177.4	17375.7	17604.8	17894.1	18429.2	18946.5	19508.4	20316.7	21106.7	21757.9	22975.8	23896.5	24348.4	25587.7	26387.6	26227.3	25302	23998.7							0	0	0	0	0		1	0	0	0	0		0		0.472
Grenada	6283.88	6416.95	6348.83	6112.01	6210.74	6312.27	6533	6811.86	7244.81	7963.61	8148.58	7959.94	8230.07	8999.64	8882.26	10053.8	9636.64	10175.5	10246.2	9535.2	9496.55		0.0523	0.0987	0.1481	0.2175	0.4834	2483.35	4686.55	7032.19	10327.5	22953.2		1	0	0	0	0		2483.35						0	0	0	0
Guatemala	3343.84	3386.82	3468.98	3522.14	3580.15	3671.71	3694.91	3769.43	3868.28	3925.01	3971.46	3966.81	4019.77	4020	4044.46	4073.83	4188.46	4344.66	4378.59	4294.43	4309.05		0.0308	0.0685	0.114	0.185	0.603	663.594	1475.85	2456.16	3985.87	12991.8		1	0	0	0	0		663.594		0.651				0	0	0	0
Guinea	854.307	830.862	809.305	802.253	792.149	794.484	803.522	824.608	838.413	855.833	862.689	879.248	909.284	904.751	908.644	916.655	918.195	911.27	931.44	904.404	897.945		0.064	0.105	0.151	0.219	0.462	287.342	471.421	677.949	983.25	2074.25		1	0	0	0	0		287.342		0.695				1	0	0	0
Guinea-Bissau	1207.01	1240.13	1225.54	1223.08	1233.89	1259.45	1374.43	1431.58	1006.78	994.896	1008.63	1057.88	1055.43	981.402	952.892	978.201	938.258	973.685	1052.44	1040.9	1034.95	2002	0.0728	0.1164	0.1599	0.2188	0.4321	376.722	602.341	827.443	1132.24	2236.01		1	0	0	0	0		376.722		0.677				1	0	0	0
Guyana	1563.5	1661.15	1791.87	1936.35	2096.11	2193.69	2357.79	2493.71	2439.58	2500.1	2454.34	2498.87	2515.13	2479.99	2550.42	2487.71	2599.83	2488.8	2520.55	2586.47	2682.11	1998	0.0447	0.0978	0.1469	0.2156	0.495	599.451	1311.55	1970.01	2891.31	6638.21		1	0	0	0	0		599.451		0.484				0	0	0	0
Haiti									1145.3	1155.59	1146.01	1115.6	1095.17	1082.45	1029.15	1032.78	1041.67	1062.35	1057.47	1073.76	1002.14	2001	0.0238	0.0625	0.1036	0.1764	0.6337	119.255	313.169	519.108	883.887	3175.28		1	0	0	0	0		119.255		0.597				1	1	0	0
Honduras	2650.3	2661.54	2735.75	2830.28	2723.09	2765.45	2798.95	2873.91	2894.28	2780.43	2879.82	2898.07	2946.34	3018.8	3143.27	3267.56	3413.56	3553.59	3631.17	3472.92	3530.95	2009	0.0202	0.0612	0.1142	0.2051	0.5993	356.626	1080.47	2016.17	3620.99	10580.5		1	0	0	0	0		356.626		0.592				1	0	0	0
Hungary	13119.7	11560.1	11210.3	11158.4	11503	11690.6	11729.6	12120.8	12643.9	13085.2	13673.6	14213.7	14896.6	15514.5	16294.8	16974.6	17663.6	17711.2	17900.9	16709.8	16958.3							0	0	0	0	0		1	0	0	0	0		0		0.449
Iceland	25629.7	25277.7	24119.8	24189.4	24846.1	24740.5	25784.7	26830.9	28221.9	29024.2	29867.7	30629.1	30399.1	30924.2	33055.9	34889.2	35684.5	36875.4	36626	34106.1	32755.3							0	0	0	0	0		1	0	0	0	0		0		0.689
India	1216.63	1205.28	1246.87	1281.5	1341.57	1416.99	1496.8	1530.2	1596.96	1708.94	1745.21	1799.64	1838.24	1951.77	2074.47	2233.86	2406.34	2606.16	2671.68	2860.55	3121.62		0.0854	0.121	0.157	0.208	0.428	1332.93	1888.58	2450.47	3246.48	6680.26		1	0	0	0	0		1332.93		0.535				0	0	0	0
Indonesia	2072.59	2218.47	2338.39	2466.63	2610.05	2785.08	2952.53	3045.67	2607.55	2590.45	2678.99	2736.88	2819.23	2911.92	3014.9	3141.29	3267.09	3425.31	3580.59	3695.17	3873.13	2010	0.0763	0.1133	0.1557	0.2182	0.4365	1477.6	2194.13	3015.23	4225.59	8453.11		1	0	0	0	0		1477.6		0.63				0	0	0	0
Iran	6036.61	6665.55	6849.38	6664.3	6565.17	6649.58	7009.02	7118.63	7179.31	7188.92	7437.98	7601.75	8068.12	8539.28	8870.03	9172.94	9600.79	10232	10344.6	10404.5	10404.5	2005	0.0643	0.1091	0.1554	0.2196	0.4516	3345.06	5675.68	8084.33	11424.2	23493.5		1	0	0	0	0		3345.06		0.382				0	0	0	0
Iraq								3212.61	4196.43	5077.42	4714.19	4274.52	3828.46	2184.86	3115.15	3013.85	2980.57	2950.5	3071.83	3171.25	3270.35	2007	0.087	0.1275	0.1669	0.2198	0.3988	1422.6	2084.85	2729.11	3594.11	6521.07		1	0	0	0	0		1422.6		0.356				0	0	0	0
Ireland											33188.7	34394.4	35726.3	36514.5	37417.1	38762	39893.8	41133.4	39640.6	37198.1	36785.9							0	0	0	0	0		1	0	0	0	0		0		0.525
Israel	17863.5	18115.4	18485	19000.3	19798.1	20535.2	21103.1	21276.3	21651.5	21815.5	23212.9	22621.5	22042.9	21975.8	22636.7	23340	24213.8	25095.1	25646.3	25250.2	26197.5							0	0	0	0	0		1	0	0	0	0		0		0.535
Italy	23730.9	24079.3	24263.7	24042.1	24554.2	25262.7	25542.1	26005	26374	26752.2	27717.1	28215.9	28254	28021.5	28226.9	28279.9	28737.7	29007.9	28453.6	26729.2	27059.1							0	0	0	0	0		1	0	0	0	0		0		0.442
Jamaica																7082.61					7082.61	2004	0.0535	0.0899	0.1349	0.2056	0.5161	1894.6	3183.63	4777.22	7280.92	18276.7		1	0	0	0	0		1894.6		0.555				0	0	0	0
Japan	26522.6	27319.3	27474.8	27454	27596.9	28025.7	28683.5	29065	28410.9	28300.5	28889.2	28928.3	28944.6	29369.5	30052.7	30441.3	30960.8	31635.9	31322.7	29625.4	31029.7							0	0	0	0	0		1	0	0	0	0		0		0.571
Jordan	3291.53	2997.02	3377.52	3377.47	3410.47	3505.57	3471.11	3477.52	3474.19	3528.14	3588.79	3685.77	3805.62	3867.35	4098.5	4332.88	4578.94	4843.93	5082.05	5243.81	5248.54	2010	0.0771	0.1157	0.1567	0.2146	0.4359	2023.31	3036.28	4112.23	5631.69	11439.2		1	0	0	0	0		2023.31		0.371				0	0	0	0
Kazakhstan	7089.13	6270.01	5941.82	5431.08	4816.13	4499.36	4590.87	4743.26	4734.16	4908.51	5405.77	6145.99	6748.02	7350.81	8000.7	8699.1	9528.59	10258.6	10468.8	10318.3	10915.7	2009	0.0912	0.1315	0.1707	0.2225	0.3841	4977.54	7177.05	9316.52	12143.7	20963.5		1	0	0	0	0		4977.54		0.674				0	0	0	0
Kenya	1421.11	1394.53	1339.18	1302.19	1296.56	1315.01	1332.21	1303.51	1312.01	1308.07	1281.99	1295.61	1268.19	1270.55	1299.77	1339.96	1387.12	1445.02	1428.45	1428.78	1471.08		0.0484	0.0868	0.132	0.201	0.532	356.002	638.45	970.915	1478.44	3913.08		1	0	0	0	0		356.002		0.603				1	0	0	0
Kiribati	1881.46	1767.8	1796.97	1835.41	1900.97	1857.09	1941.87	2018.43	2203.89	2170.32	2336.14	2311.44	2283.12	2332.4	2364.05	2319.97	2179.61	2307.11	2334.88	2284.66	2239.02							0	0	0	0	0		1	0	0	0	0		0
Kuwait						42714.2	42996.5	42693	42041.1	39104.7	39054.2	37861.8	37710	42817.3	45463.7	48096.5	48062.2	47464.7	47107.8	42363.4	39403.1							0	0	0	0	0		1	0	0	0	0		0		0.665
Kyrgyzstan	2523.49	2287.65	1947.33	1645.81	1315.71	1231.99	1299.89	1408.09	1416.07	1446.19	1506.62	1571.81	1557.18	1649.27	1743.93	1721.34	1755.78	1887.68	2026.93	2060.4	2026.37							0	0	0	0	0		1	0	0	0	0		0		0.606
Laos	932.528	944.681	968.85	997.733	1050.68	1096.78	1145.69	1197.97	1220.55	1285.69	1337.49	1393.24	1455.73	1523.76	1597.87	1684.39	1796.9	1895.68	2002.11	2108.07	2242.12		0.0764	0.113	0.153	0.209	0.448	856.491	1266.8	1715.22	2343.02	5022.35		1	0	0	0	0		856.491		0.765				0	0	0	0
Latvia	10108.7	8877.43	6109.67	5920.84	6152.62	6182.02	6489.05	7096.91	7502.49	7919.24	8529.2	9285.58	9955.87	10733.2	11727.8	13040.5	14716.1	16268.7	15647.1	12901.8	12948.3							0	0	0	0	0		1	0	0	0	0		0		0.48
Lebanon	6257.49	8492.52	8656.43	9009.98	9489.69	9914	10295.7	9989.55	10277.7	10092.7	9979.67	9996.58	9869.42	9707.09	9990.49	9753.06	9588.08	10157.9	10977.1	11739.5	12288.8		0.0703333	0.111533	0.156867	0.219767	0.4415	4321.57	6853.07	9638.54	13503.4	27127.6		1	0	0	0	0		4321.57		0.425				0	0	0	0
Lesotho	930.53	948.829	997.775	1010.86	1045.35	1048.78	1087.72	1118.03	1125.09	1118.56	1165.53	1204.9	1202.33	1249.94	1269.72	1294.7	1340.32	1392.74	1460.33	1499.39	1602.04	2003	0.0297	0.0721	0.1252	0.2095	0.5635	237.903	577.536	1002.88	1678.14	4513.75		1	0	0	0	0		237.903		0.499				1	0	0	0
Liberia	359.502	313.857	207.493	140.619	109.319	101.598	107.803	206.629	247.799	284.144	338.617	398.712	513.558	339.034	315.606	336.532	356.89	396.762	420.584	459.842	492.56	2007	0.064	0.114	0.157	0.216	0.45	157.619	280.759	386.66	531.965	1108.26		1	0	0	0	0		157.619		0.589				1	1	1	0
Libya										12502.7	12756.8	12016.8	11679.1	12997.3	13361.2	14454.4	15059.5	15699.1	16033.1	16129.5	16129.5		0.0735167	0.11665	0.16005	0.219933	0.43	5928.95	9407.55	12907.7	17737.1	34678.5		1	0	0	0	0		5928.95		0.488				0	0	0	0
Lithuania	12499.7	11770.2	9278.08	7809.48	7095.88	7385.97	7828.05	8475.04	9187.91	9154.02	9518.31	10212.7	10952.1	12126.3	13088.2	14197.3	15402.3	17010.4	17599.6	15088.9	15534.5							0	0	0	0	0		1	0	0	0	0		0		0.483
Luxembourg	42706.9	45781.2	45999.1	47292.2	48435.1	48443.5	48512.7	50753	53379.4	57097.8	61091.2	61888.3	63748.2	64027.1	65882.4	68290.3	70527.1	74021.5	72176	66915.1	67742.5							0	0	0	0	0		1	0	0	0	0		0		0.545
Macedonia	8097.09	7616	7157.9	6670.37	6586.88	6519.55	6569.43	6608.89	6759.46	6978.69	7233.43	6862.72	6890.12	7062.31	7371.88	7676.83	8048.55	8531.96	8945.12	8855.26	9104.28							0	0	0	0	0		1	0	0	0	0		0		0.378
Madagascar	1012.72	920.709	903.855	895.073	867.277	855.06	846.373	850.281	856.172	868.318	881.803	906.599	768.033	818.286	836.182	849.467	866.745	894.934	931.989	868.72	849.119	2010	0.0541	0.0948	0.1409	0.2088	0.5014	229.687	402.483	598.205	886.48	2128.74		1	0	0	0	0		229.687		0.858				1	1	0	0
Malawi	567.587	603.694	553.584	604.683	539.947	623.169	656.299	664.758	671.552	672.345	664.315	614.881	609.415	626.545	639.677	639.74	634.15	673.772	708.043	748.97	657.73	2010	0.056	0.095	0.14	0.207	0.502	184.164	312.422	460.411	680.75	1650.9		1	0	0	0	0		184.164		0.768				1	1	0	0
Malaysia	6873.68	7329.04	7774.48	8328.54	8868.38	9496.24	10183.5	10655.6	9628.85	9978.36	10619	10448.7	10791.8	11197.8	11733.7	12130.6	12572.8	13122.1	13510	13071.9	13801.4	2009	0.0454	0.0865	0.1372	0.2164	0.5154	3132.91	5969.09	9467.73	14933.1	35566.1		1	0	0	0	0		3132.91		0.571				0	0	0	0
Maldives												4518.59	4710.74	5286.77	5846.77	5248.57	6167.74	6699.07	7382.05	6984.25	7338.73	2004	0.0651	0.1088	0.1571	0.2266	0.4442	2388.76	3992.27	5764.57	8314.78	16299.3		1	0	0	0	0		2388.76		0.58				0	0	0	0
Mali	724.249	720.89	762.922	728.004	715.849	740.892	745.391	775.595	801.21	832.461	835.382	909.672	919.603	958.351	949.408	976.066	1026.75	1037.22	1054.65	1067.46	1095.12		0.0797	0.1199	0.1633	0.2241	0.413	436.405	656.524	894.165	1227.08	2261.42		1	0	0	0	0		436.405		0.604				1	0	0	0
Malta	13674.1	14385.2	14912.7	15433.7	16162.5	17071.9	17609.6	18409.5	19236.2	20046.2	21291	20338.9	20755.4	20646.6	20405.2	21018.6	21350.1	22119.9	22922.6	22204.5	22696.8							0	0	0	0	0		1	0	0	0	0		0		0.473
Mauritania	1737.86	1720.31	1703.78	1753.08	1651.11	1761.23	1809.9	1686.24	1710.91	1788.57	1728.03	1710.13	1670.03	1717.22	1762.57	1865.26	2154.53	2128.61	2143.69	2061.42	2110.19		0.0602	0.104	0.151	0.215	0.47	635.166	1097.3	1593.19	2268.45	4958.94		1	0	0	0	0		635.166		0.369				0	0	0	0
Mauritius	6104.29	6306.6	6629.52	6884.34	7069.41	7309.4	7639.31	7973.33	8368.9	8478.92	9153.88	9287.67	9403.12	9646.42	10113.2	10157.5	10478.9	11028.2	11561.2	11848.4	12278.6		0.0532	0.09475	0.13915	0.2049	0.508	3266.11	5817	8542.85	12579.5	31187.7		1	0	0	0	0		3266.11		0.542				0	0	0	0
Mexico	10023.4	10231.1	10381.8	10579.9	10856.5	10032.8	10424.5	10951.2	11271.4	11386.7	11810.1	11575.2	11440.2	11459.9	11807.3	12017.1	12462.2	12694.6	12711.3	11962.5	12412.5		0.0493	0.0879	0.133	0.202	0.528	3059.68	5455.28	8254.3	12536.6	32768.9		1	0	0	0	0		3059.68		0.579				0	0	0	0
Moldova	4583.06	3839.38	2719.92	2690.18	1864.45	1847.8	1755.23	1787.26	1674.23	1619.87	1657.25	1762.28	1904.15	2035.54	2191.8	2361.95	2481.63	2563.93	2768.27	2605.75	2793.38							0	0	0	0	0		1	0	0	0	0		0		0.38
Mongolia	2444.16	2197.69	1971.52	1892.43	1918.16	2024.89	2053.59	2116.14	2168.35	2215.57	2221.07	2265.68	2350.03	2488.8	2722.75	2885.28	3091.78	3361.9	3608.6	3510.31	3677.98	2008	0.071	0.1115	0.1562	0.2209	0.4404	1305.68	2050.47	2872.5	4062.33	8098.91		1	0	0	0	0		1305.68		0.572				0	0	0	0
Montenegro								7485.53	7863.42	7131.02	7354.13	7431.03	7562.33	7737.19	8061.57	8384.47	9090.27	10047.5	10726.1	10102.3	10343.7							0	0	0	0	0		1	0	0	0	0		0		0.408
Morocco	2698.7	2832.51	2671.05	2599.88	2823.08	2596.5	2870.1	2765.65	2936.32	2913.48	2923.98	3109.24	3178.23	3344.91	3471.35	3540.42	3779.25	3845.37	4020.92	4167.55	4268.03		0.0652	0.105	0.145	0.206	0.479	1391.38	2240.71	3094.32	4396.07	10221.9		1	0	0	0	0		1391.38		0.455				0	0	0	0
Mozambique	395.041	404.687	371.801	389.257	400.525	397.75	414.681	444.944	480.529	506.478	498.626	542.806	574.334	591.969	626.075	661.864	684.895	715.412	744.424	771.296	805.048	2008	0.0523	0.0947	0.1374	0.201	0.5146	210.52	381.19	553.068	809.074	2071.39		1	0	0	0	0		210.52		0.783				1	1	0	0
Myanmar																					5507.1		0.0677143	0.107914	0.1523	0.217694	0.454514	1864.55	2971.47	4193.66	5994.32	12515.3		1	0	0	0	0		1864.55		0.752				0	0	0	0
Namibia	3985.3	4161.93	4321.1	4109.97	4283.36	4329.11	4333.59	4381.07	4395.94	4428.13	4484.08	4458.71	4607.69	4747.42	5271.26	5341.32	5646.95	5871.02	5982.73	5827.26	6092.03		0.0315	0.0503	0.0824	0.15	0.686	959.494	1532.14	2509.91	4569.02	20895.6		1	0	0	0	0		959.494		0.477				0	0	0	0
Nepal	747.246	775.217	786.656	796.023	839.361	846.464	869.268	890.711	895.725	914.033	950.019	975.796	958.821	979.471	1009.03	1028.85	1049.28	1071.87	1124.33	1162.21	1204.53	2010	0.0827	0.122	0.162	0.219	0.415	498.071	734.761	975.666	1318.96	2499.39		1	0	0	0	0		498.071		0.813				0	0	0	0
Netherlands	26275.8	26705.4	26956.4	27105.8	27740.7	28464.1	29298.3	30394.9	31393.3	32645.9	33690.8	34081.4	33890.4	33844.1	34481	35104.5	36237.8	37576.7	38105.9	36520.1	36888.3							0	0	0	0	0		1	0	0	0	0		0		0.618
New Zealand	19515.5	18388.9	18399.9	19349.2	20050.6	20584.1	20918.5	21207.2	21295.3	22267.9	22636.8	23309.7	24027.1	24474.3	24960.1	25473.8	25590.5	26228.3	25498	25458.6	25215							0	0	0	0	0		1	0	0	0	0		0		0.632
Nicaragua	2437.09	2375.4	2326.81	2261.43	2282.17	2364	2462.62	2511.39	2558.16	2692.47	2759.04	2799.15	2781.62	2814.58	2926.44	3013.21	3098.72	3213.49	3299.16	3184.95	3255.62	2005	0.0622	0.1021	0.1479	0.2154	0.4724	1012.5	1661.99	2407.53	3506.3	7689.77		1	0	0	0	0		1012.5		0.576				0	0	0	0
Niger	704.772	699.843	633.18	621.136	624.192	618.427	617.184	611.645	651.183	624.232	593.394	612.875	608.774	618.192	596.662	601.052	612.861	609.099	643.013	614.856	641.547	2008	0.0809	0.1183	0.1577	0.2125	0.4306	259.506	379.475	505.86	681.644	1381.25		1	0	0	0	0		259.506		0.614				1	1	0	0
Nigeria	1286	1245.9	1220.12	1214.8	1195.62	1162.57	1190.52	1193.67	1195.79	1171.74	1203.48	1225.37	1240.06	1334.12	1738.95	1752.63	1847.19	1921.4	1987.59	2068.33	2170.06		0.044	0.083	0.13	0.203	0.54	477.413	900.574	1410.54	2202.61	5859.15		1	0	0	0	0		477.413		0.514				0	0	0	0
North Korea																					13875.3		0.0634667	0.112167	0.166767	0.225367	0.4389	4403.11	7781.75	11569.7	15635.2	30449.4		1	0	0	0	0		4403.11						0	0	0	0
Norway	32362.7	33209.1	34181.3	34925.3	36481.2	37811.6	39539	41445.8	42305.1	42867.5	43975.9	44624.7	45051.4	45227.2	46741.6	47626.3	48330.3	49101.8	48526.4	47134.8	46773.9							0	0	0	0	0		1	0	0	0	0		0		0.633
Oman	15131	15412	16024.1	16341.2	16448.8	16907.1	17250.8	18277.1	18817	18783.6	19615.3	20645.1	20538.8	19904.5	19955.8	20273	21115.2	22420.9	25058.9	24671.5	24753.1		0.0718	0.113	0.153	0.21	0.453	8886.37	13985.5	18936.1	25990.8	56065.8		1	0	0	0	0		8886.37		0.548				0	0	0	0
Pakistan	1631.13	1666.61	1748.17	1733.88	1753.31	1793.27	1831.13	1801.05	1799.28	1819.48	1854.11	1851.92	1875.41	1931.13	2036.92	2153.95	2245.3	2310.41	2306.39	2328.67	2324.34		0.096	0.129	0.164	0.212	0.4	1115.68	1499.2	1905.95	2463.8	4648.67		1	0	0	0	0		1115.68		0.512				0	0	0	0
Palestine																					6949.72							0	0	0	0	0		1	0	0	0	0		0
Panama	5899.54	6322.09	6700.8	6922.69	6975.26	6952.82	7002.14	7302.09	7678.34	7817.64	7869.24	7758	7776.11	7947.24	8383.29	8819.04	9396.41	10345.9	11192.4	11423.5	12067	2010	0.033	0.0775	0.1251	0.2006	0.5638	1991.05	4675.96	7547.9	12103.2	34016.8		1	0	0	0	0		1991.05		0.612				0	0	0	0
Papua New Guinea	1688.85	1804.99	2004.5	2310.58	2386.35	2248.51	2359.8	2208.45	2069.55	2053.08	1950.4	1898.71	1848.37	1841.83	1845.78	1865.89	1868.19	1955.17	2037.36	2100.07	2217.11	1996	0.0452	0.0774	0.121	0.193	0.564	501.067	858.021	1341.35	2139.51	6252.25		1	0	0	0	0		501.067		0.707				0	0	0	0
Paraguay	4537.79	4577.19	4539.72	4648.96	4781.08	4990.13	4955.29	5052.8	4948.38	4778.7	4572.2	4442.42	4353.18	4452.58	4544.48	4554.3	4685.45	4850.37	5067.22	4780.88	5312.81	2010	0.0326	0.0776	0.1277	0.1978	0.5643	865.988	2061.37	3392.23	5254.37	14990.1		1	0	0	0	0		865.988		0.659				0	0	0	0
Peru	4459.11	4465.18	4360.4	4482.65	4964.98	5296.03	5334.31	5602.99	5474.05	5436.81	5513.57	5447.42	5644.37	5797.48	6012.6	6349.05	6765.48	7288.07	7916.48	7904.27	8502.61	2010	0.0391	0.0834	0.1363	0.2153	0.5259	1662.26	3545.59	5794.53	9153.06	22357.6		1	0	0	0	0		1662.26		0.729				0	0	0	0
Philippines	2538.4	2462.98	2413.5	2408.24	2457.25	2514.72	2602.72	2677.64	2604.5	2627.38	2685.56	2705.93	2747.22	2826.12	2957.18	3041.06	3143.89	3295	3375.03	3357.5	3553.5	2010	0.0598	0.0942	0.1387	0.2104	0.4969	1062.5	1673.7	2464.35	3738.28	8828.68		1	0	0	0	0		1062.5		0.6				0	0	0	0
Poland	8182.09	7581.14	7748	8017.22	8423.76	8997.15	9551.21	10221.3	10726.7	11212.9	11753.4	11959	12137.2	12615.1	13297.1	13784.2	14651.8	15654.5	16454.8	16706.8	17372.3							0	0	0	0	0		1	0	0	0	0		0		0.505
Portugal	16177.4	16910	17090.7	16720.3	16845.3	17520.7	18117.3	18853.4	19747.5	20465.6	21154.9	21431.9	21438.7	21095.5	21300.4	21369	21606.9	22068	22036.9	21375.7	21779.6							0	0	0	0	0		1	0	0	0	0		0		0.552
Qatar											64529.8	64703	67344.1	66475.7	73624.4	69497.7	69949.6	69300.9	69164.8	67313.1	70239.3		0.07565	0.1183	0.16115	0.21925	0.4252	26568	41546.6	56595.3	76999.8	149329		1	0	0	0	0		26568		0.86				0	0	0	0
Romania	7852.7	6899.38	6346.53	6451.22	6717.1	7212.62	7523.41	7084.64	6759.33	6688.71	6838.02	7329.35	7819.33	8249.06	8965.53	9361.41	10122.8	10750.5	11620.6	10873.2	10715.1							0	0	0	0	0		1	0	0	0	0		0		0.52
Russia	12625.6	11961.6	10219	9343.79	8179.43	7850.84	7588.8	7717.77	7328.87	7829.37	8612.66	9073.13	9546.04	10292.1	11088.2	11852.8	12877.7	14016.2	14767.3	13616.2	14181.6							0	0	0	0	0		1	0	0	0	0		0		0.583
Rwanda	707.105	713.151	804.471	797.589	420.216	574.717	618.93	645.729	634.398	623.103	631.319	657.507	727.447	726.793	766.51	820.176	868.985	910.144	982.551	1013.49	1055.87		0.046	0.0787	0.115	0.174	0.586	242.849	415.483	607.122	918.603	3093.68		1	0	0	0	0		242.849		0.857				1	1	0	0
Saint Lucia	7562.79	7655.67	8090.77	8203.11	8224.05	8391.73	8732.19	8649.45	9074.44	9168.25	9118.87	8588.42	8513.87	8807.5	9448.09	9160.1	9876.8	9877.75	10247.9	10117.1	10032	1995	0.0523	0.0987	0.1481	0.2175	0.4834	2623.37	4950.79	7428.69	10909.8	24247.3		1	0	0	0	0		2623.37						0	0	0	0
Saint Vincent and the Grenadines	5426.49	5444.62	5843.95	5847.95	5670.65	5727.82	5806.95	6582.5	6928.16	7236.29	7194.33	7306.75	7752.62	8325.02	8654.73	8852.59	9517.82	9828.35	9954.7	9729.69	9452.86		0.0523	0.0987	0.1481	0.2175	0.4834	2471.92	4664.99	6999.85	10280	22847.6		1	0	0	0	0		2471.92						0	0	0	0
Samoa	2595.75	2517.38	2489.66	2566.34	2477.69	2618.86	2791.02	2798.5	2852.46	2904.46	3093.27	3294.65	3419.92	3560.96	3708.29	3837.69	3889.21	3933.86	4076.09	3841.82	3829.72		0.062	0.0987	0.141	0.203	0.496	1187.21	1889.97	2699.95	3887.16	9497.7		1	0	0	0	0		1187.21						0	0	0	0
São Tomé and Príncipe												1318.24	1319.67	1379.82	1410.19	1398.23	1432.4	1420	1504.09	1519.56	1543.66	2001	0.0523	0.085	0.1223	0.1769	0.5653	403.668	656.057	943.951	1365.37	4363.17		1	0	0	0	0		403.668						1	0	0	0
Saudi Arabia	18973	20040.1	20331.6	19770.6	19422.2	19073	19424.5	19705.9	20031.1	19538.9	19956.5	19348.3	18544.4	19178.6	19969.5	20680.4	21246.9	22047.6	23496.9	23542.8	24864.4		0.07325	0.115225	0.158725	0.21835	0.434225	9106.57	14325	19733	27145.7	53983.6		1	0	0	0	0		9106.57		0.487				0	0	0	0
Senegal	1427.55	1419.54	1393.77	1370.13	1330.91	1364.35	1356.18	1364.4	1410.45	1463.98	1473.57	1501.87	1472.28	1528.96	1575.33	1619.13	1614.29	1648.18	1662.27	1655.47	1677.62		0.0622	0.1061	0.1532	0.2197	0.4588	521.739	889.976	1285.06	1842.86	3848.45		1	0	0	0	0		521.739		0.687				0	0	0	0
Serbia	11601.9	10453.7	7563.82	5220.11	5326.17	5647.89	6112.21	6781.66	6903.03	6152.12	6501.34	6857.69	7143.65	7353.77	8056.45	8517.05	8858.43	9374.71	9772.47	9468.32	9602.43							0	0	0	0	0		1	0	0	0	0		0		0.419
Seychelles	13932.2	14164	14988.9	15685.2	15304.6	14931	15404.8	17048.1	18121.3	18110.1	18703.7	18262.9	17948	16995.3	16634.4	18045	19345.6	21252.2	20337.4	20033.4	20640	2007	0.0371	0.0566	0.0832	0.1268	0.6963	3828.72	5841.12	8586.25	13085.8	71858.2		1	0	0	0	0		3828.72						0	0	0	0
Sierra Leone	984.73	1005.26	818.478	838.105	830.079	768.428	783.38	735.725	742.515	715.436	742.883	664.801	802.559	836.931	851.711	855.336	876.156	923.007	951.748	963.684	996.548		0.0609	0.0965	0.1404	0.2093	0.4929	303.449	480.835	699.577	1042.89	2455.99		1	0	0	0	0		303.449		0.649				1	0	0	0
Singapore	25234	26115.5	27124.6	29482.7	31594.6	32879.6	33977.7	35651.4	33712.5	35516.7	38063.1	36622.6	37814.2	40134.4	43264.6	45374.2	47768.4	49952.3	48191.3	46391.4	52313.9							0	0	0	0	0		1	0	0	0	0		0		0.651
Slovakia	12692.6	10834.4	10102.9	9692.01	10253	10820.4	11547	12037.6	12545.7	12537.7	12726.5	13193.7	13797.9	14455.3	15178.4	16174.8	17510.4	19326.7	20402.9	19353.9	20120.7							0	0	0	0	0		1	0	0	0	0		0		0.505
Slovenia	16454.7	14980.7	14183	14621.1	15417.8	15976	16569.1	17413.9	18065.3	19013.8	19766.3	20315.3	21066.6	21670.8	22610.2	23475.6	24769.6	26323.7	27225.5	24819.9	25052.9							0	0	0	0	0		1	0	0	0	0		0		0.55
Solomon Islands	2322.29	2393.31	2621.68	2649.6	2812.34	2959.01	2923.48	2802.34	2774.66	2686.76	2241.9	2008.51	1901.32	1972.93	2017.63	2074.98	2166.32	2342.55	2456.69	2373.36	2484.11		0.0452	0.0774	0.121	0.193	0.564	561.408	961.35	1502.89	2397.16	7005.18		1	0	0	0	0		561.408		0.634				0	0	0	0
Somalia																					1467		0.0629	0.105	0.149	0.212	0.472	461.372	770.175	1092.92	1555.02	3462.12		1	0	0	0	0		461.372		0.518				0	0	0	0
South Africa	7974.71	7732.46	7410.96	7345.61	7422.84	7490.39	7641.05	7665.86	7526.47	7520.2	7641	7690.99	7863.9	7993.43	8259.3	8596.83	8977.29	9371.99	9604.82	9357.13	9516.45		0.027	0.0463	0.0816	0.163	0.682	1284.72	2203.06	3882.71	7755.91	32451.1		1	0	0	0	0		1284.72		0.387				0	0	0	0
South Korea	8768.5	9503.69	9971.07	10488.3	11281.9	12141.6	12868	13340.8	12337	13411.7	14428.8	14891.6	15867.5	16231.5	16917.6	17550.9	18370.5	19218.6	19519.4	19489	20625.1	1998	0.0791	0.1356	0.1795	0.2313	0.3745	8157.23	13983.8	18511	23852.9	38620.5		1	0	0	0	0		8157.23						0	0	0	0
Spain	19776.7	20234	20354.8	20082.3	20505.6	21021.8	21480.2	22252.5	23165.6	24140.3	25147.1	25777.1	26095.4	26459.3	26882	27392	28044.4	28527.1	28353.9	27057.7	26908							0	0	0	0	0		1	0	0	0	0		0		0.472
Sri Lanka	2029.22	2091.58	2163.69	2284.14	2379.03	2475.97	2542.02	2671.05	2764.39	2842.12	3005.39	3006.96	3105.69	3246.93	3377.57	3550.21	3781.26	4001.79	4202.57	4301.72	4600.87	2010	0.0772	0.1139	0.1533	0.2097	0.4459	1775.94	2620.2	3526.57	4824.02	10257.6		1	0	0	0	0		1775.94		0.523				0	0	0	0
Sudan	993.777	1037.57	1072.62	1087.44	1065.4	1096.52	1129.02	1214.48	1232.99	1237.22	1279.95	1325.5	1371.37	1435.96	1449.7	1514.37	1619.81	1755.51	1757.83	1764.95	1777.48		0.0681	0.1165	0.164	0.2273	0.4241	605.233	1035.38	1457.54	2020.11	3769.15		1	0	0	0	0		605.233		0.455				0	0	0	0
Suriname	5323.9	5390.91	5305.31	4855.2	4947.07	4934.66	4930.14	5142.68	5152.36	5037.62	4964.55	5117.73	5262.33	5501.05	5930.72	6125.71	6289.76	6543.3	6749.11	6888.34	7113.61	1999	0.0318	0.0723	0.1231	0.2035	0.5693	1131.06	2571.57	4378.42	7238.09	20248.9		1	0	0	0	0		1131.06		0.473				0	0	0	0
Swaziland	3895.17	3854.2	3887.84	3929.5	3947.13	4055.13	4120.78	4154.72	4172.02	4215.4	4226.83	4231.83	4277.5	4350.22	4448.74	4517.54	4609.93	4701.14	4732.94	4712.22	4721.84	2010	0.0405	0.0773	0.12	0.2	0.566	956.172	1824.99	2833.1	4721.84	13362.8		1	0	0	0	0		956.172		0.437				0	0	0	0
Sweden	24564.9	24118.4	23699.6	23075.6	23831.6	24640.5	24998	25660.3	26724.5	27948	29145.5	29434.3	30067.2	30655.2	31828	32703	33917	34782.2	34300.6	32299.7	34125.3							0	0	0	0	0		1	0	0	0	0		0		0.58
Switzerland	34418.7	33679.9	33296.1	32952.7	33106.1	33043.8	33057.6	33651.5	34469.1	34784	35858.9	36075.7	35870.2	35612.5	36224.9	36963.6	38110.4	39223.9	39566.8	38318.7	39041.6							0	0	0	0	0		1	0	0	0	0		0		0.648
Syria	2937.36	3078.76	3395.56	3472.73	3635.84	3739.63	3796.13	3756.9	3886.66	3653.75	3667.88	3782.45	3936.39	3890.46	4070.08	4205.52	4266.08	4334.85	4355.24	4466.08	4501.74	2004	0.0768	0.1143	0.1553	0.2143	0.4393	1728.67	2572.74	3495.6	4823.61	9888.06		1	0	0	0	0		1728.67		0.398				0	0	0	0
Tajikistan	3008.52	2732.86	1903.22	1564.58	1212.79	1047.4	860.871	864.472	898.82	919.577	981.173	1063.51	1157.25	1259.86	1361.62	1422.59	1489.59	1573.35	1660.86	1679.45	1746.42	2009	0.0829	0.1275	0.1701	0.2258	0.3937	723.892	1113.34	1485.33	1971.71	3437.83		1	0	0	0	0		723.892		0.594				0	0	0	0
Tanzania	858.426	847.904	824.771	807.468	794.496	798.813	812.482	819.726	829.379	848.493	868.498	897.569	937.455	976.049	1024.52	1070.07	1110.26	1155.62	1205.45	1240.44	1288.5		0.068	0.111	0.1565	0.217	0.448	438.091	715.119	1008.25	1398.03	2886.25		1	0	0	0	0		438.091		0.866				1	0	0	0
Thailand	3967.39	4261.62	4568.02	4910.14	5312.85	5755.14	6035.61	5889.08	5209.9	5378.03	5568.41	5623.63	5855.02	6205.9	6538.86	6790.7	7101.4	7437.83	7610.12	7422.5	7987.18	2010	0.0676	0.105	0.1462	0.2145	0.4667	2699.67	4193.27	5838.63	8566.25	18638.1		1	0	0	0	0		2699.67		0.717				0	0	0	0
The Bahamas	28945.7	27229.2	25696	25298.9	25649.5	26368.2	27130.4	27384.2	28371.1	30033.7	30826.4	31088	31305.4	30264.6	29890.1	30276.9	30434.7	30294.8	29056.3	27359.9	27169.9		0.0391	0.08465	0.1301	0.2002	0.54595	5311.72	11499.7	17674	27197.1	74167.1		1	0	0	0	0		5311.72						0	0	0	0
The Gambia	1604.93	1597.86	1600.94	1602.42	1561.02	1531.69	1522.63	1553.22	1562.81	1615.63	1654.94	1698.64	1593.15	1649.73	1710.99	1642.24	1609.41	1616.51	1656.59	1708.91	1763.78		0.0479	0.0856	0.132	0.206	0.528	422.425	754.898	1164.09	1816.69	4656.38		1	0	0	0	0		422.425						1	0	0	0
Timor-Leste										932.66	1053.4	1200.58	1085.3	1023.01	991.247	1038.75	974.711	1055.08	1173.71	1285.2	1367.26		0.0763	0.1133	0.1557	0.2182	0.4365	521.608	774.551	1064.41	1491.68	2984.04		1	0	0	0	0		521.608		0.371				0	0	0	0
Togo	933.91	903.492	846.271	701.437	787.422	828.784	879.903	981.36	934.633	933.531	902.65	865.292	835.319	854.151	849.807	837.743	849.366	846.639	843.41	850.715	862.041		0.0762	0.1174	0.1609	0.2215	0.424	328.438	506.018	693.512	954.71	1827.53		1	0	0	0	0		328.438		0.746				1	0	0	0
Tonga	2980.63	3166.65	3170.57	3285.06	3442.28	3562.01	3551.64	3533.89	3614.36	3736.71	3842.72	3959.22	4070.54	4132.97	4147.71	4219.59	4124.9	3928.25	3938.37	4041.95	4154.85		0.062	0.0987	0.141	0.203	0.496	1288	2050.42	2929.17	4217.17	10304		1	0	0	0	0		1288						0	0	0	0
Trinidad and Tobago	10767.1	10983.9	10736.8	10522.4	10845.7	11232.5	11644.6	11937.6	12846	13386.1	14171.3	14701	15812.2	18007.9	19332.5	20343.6	23023.4	23997.2	24690.3	23497.6	23447.8	1992	0.0551	0.1033	0.1553	0.2274	0.4589	6459.86	12110.8	18207.2	26660.1	53800.9		1	0	0	0	0		6459.86		0.6				0	0	0	0
Tunisia	4467.54	4550.57	4806.56	4816.78	4880.8	4916.33	5191.28	5399.06	5585.64	5847.02	6053.52	6278.4	6320.9	6632.59	6971.97	7182.37	7492.73	7892.37	8173.72	8333.68	8494.59	2010	0.0674	0.1154	0.1623	0.2275	0.4292	2862.68	4901.38	6893.36	9662.6	18229.4		1	0	0	0	0		2862.68		0.41				0	0	0	0
Turkey	8108.6	8030.67	8298.46	8791.96	8250.56	8762.33	9263.31	9811.75	9885.01	9408.76	9898.15	9199.39	9627.94	9994.09	10781.5	11532.5	12168.8	12577.4	12504.3	11754.2	12671.1	2010	0.0553	0.1056	0.1557	0.2235	0.4599	3503.56	6690.35	9864.46	14160	29137.2		1	0	0	0	0		3503.56		0.427				0	0	0	0
Turkmenistan	6114.92	5671.95	4686.89	4626.17	3729.08	3384.15	3543.47	3090.06	3264.8	3757.22	3916.94	4041.88	4009.63	4098.06	4258.23	4761.85	5224.93	5735.01	6498.73	6810.09	7343.65	1998	0.0614	0.1015	0.1473	0.2151	0.4747	2254.5	3726.9	5408.6	7898.1	17430.2		1	0	0	0	0		2254.5		0.537				0	0	0	0
Uganda	567.959	578.99	578.629	606.097	624.012	673.788	712.018	725.396	737.732	772.484	771.553	785.269	825.691	849.823	877.319	901.767	965.849	1012.43	1064.24	1103.7	1129.8		0.0584	0.0964	0.1376	0.2003	0.5073	329.9	544.562	777.299	1131.49	2865.73		1	0	0	0	0		329.9		0.745				1	0	0	0
Ukraine	8062.6	7369.08	6635.24	5688.15	4405.42	3898.65	3540.06	3465.29	3429.97	3455.54	3696.44	4077.3	4332.16	4777.99	5396.92	5583.4	6031.63	6547.08	6734.03	5762.92	6028.87							0	0	0	0	0		1	0	0	0	0		0		0.539
United Arab Emirates	73588.8	70273.2	68836.5	66150.1	67195.1	68201.4	68520	70205.7	66715.5	65326.7	69241	67839.2	67510	70283.9	70916.2	65573.1	61326.4	53233.5	46889	40637.1	36480.4		0.0643	0.1091	0.1554	0.2196	0.4516	11728.5	19900.1	28345.3	40055.5	82372.8		1	0	0	0	0		11728.5		0.75				0	0	0	0
United Kingdom	22421.3	22063.2	22288.5	23011.2	24089.7	24875	25678	26726.1	27598.9	28315.3	29445.1	29978.8	30554.3	31632.6	32471.9	33323.9	34032.2	34972.9	34473.8	32470.5	32765.5							0	0	0	0	0		1	0	0	0	0		0		0.57
United States	32965.4	32504.2	33196.2	33660.6	34592.5	35112.3	36023.6	37189.7	38394.3	39795.5	40965	40946.4	41288.8	42077.9	43273.7	44313.6	45058.6	45431	44872.7	43234.5	43952.4							0	0	0	0	0		1	0	0	0	0		0		0.574
Uruguay	7299.55	7504.79	8041.7	8195.12	8727.66	8539.57	8951.49	9648.41	10019.7	9774.28	9551.13	9167.63	8456.91	8530.37	8961.52	9626.21	10005.5	10633.9	11361.3	11576.5	12569.1							0	0	0	0	0		1	0	0	0	0		0		0.61
Uzbekistan	2002.21	1950.33	1691.76	1615.71	1501.92	1461.75	1458.44	1505.62	1545.29	1594.46	1632.3	1679.47	1725.4	1777.06	1891.94	2000.97	2121	2289.67	2455.99	2610.5	2753.56	2003	0.0714	0.1152	0.1567	0.2148	0.4419	983.021	1586.05	2157.41	2957.32	6083.99		1	0	0	0	0		983.021		0.539				0	0	0	0
Vanuatu	3463.23	3473.73	3461.32	3387.54	3595.45	3544.89	3552.14	3658.48	3750.06	3694.73	3835.04	3618.6	3351.05	3407.06	3452.87	3544.97	3750.42	3848.66	3998.82	4033.81	4004.83		0.062	0.0987	0.141	0.203	0.496	1241.5	1976.39	2823.41	4064.91	9931.99		1	0	0	0	0		1241.5						0	0	0	0
Venezuela	9578.43	10261.9	10635.1	10428.2	9963.63	10139.1	9910.58	10329.8	10156.1	9365.37	9526.64	9666.66	8649.53	7835.35	9104.38	9869.17	10658	11396.1	11799.4	11236.7	10894							0	0	0	0	0		1	0	0	0	0		0		0.593
Vietnam	1013.96	1054.82	1125.8	1195.82	1279.83	1379.13	1484	1580.14	1645.77	1698.66	1789.78	1876.69	1972.29	2084	2214.39	2353.88	2490.34	2639.13	2759.03	2877.44	3030.3	2008	0.0742	0.1152	0.1581	0.2184	0.4341	1124.24	1745.45	2395.45	3309.09	6577.26		1	0	0	0	0		1124.24		0.749				0	0	0	0
Yemen	1836.73	1858.64	1909.96	1887.14	1920.28	1945.18	1962.12	1999.38	2058.55	2077.17	2144.27	2163.19	2185.16	2204.05	2229.52	2292.59	2305.52	2323.95	2350.85	2383.95	2507.41		0.0718	0.113	0.153	0.21	0.453	900.16	1416.69	1918.17	2632.78	5679.28		1	0	0	0	0		900.16		0.395				0	0	0	0
Zambia	1251.05	1220.46	1171.46	1222.34	1090.69	1034.04	1077.59	1083.67	1034.94	1029.82	1038.41	1061.78	1069.83	1096.9	1127.19	1156.82	1196.58	1235.91	1274.16	1312.35	1370.47		0.0358	0.0663	0.104	0.175	0.622	245.315	454.312	712.646	1199.16	4262.17		1	0	0	0	0		245.315		0.691				1	1	0	0
Zimbabwe	678.552	697.99	620.708	614.392	658.339	647.442	702.052	708.92	718.418	703.612	675.6	680.801	617.593	511.331	480.878	452.789	436.644	420.169	344.742	362.4	391.55		0.0463	0.0814	0.122	0.193	0.557	90.6439	159.361	238.846	377.846	1090.47		1	0	0	0	0		90.6439		0.827				1	1	1	1
[truncated: 47 more columns]

## Sheet: Results_15+
	1990	1991	1992	1993	1994	1995	1996	1997	1998	1999	2000	2001	2002	2003	2004	2005	2006	2007	2008	2009	2010	2011	2012	2013	2014	2015	2016	2017	2018	2019	2020	2021	2022	2023	2024	2025	2026	2027	2028	2029	2030
WORLD
Men	2.71132e+07	2.78906e+07	2.85515e+07	2.92494e+07	2.99728e+07	3.07142e+07	3.11898e+07	3.16806e+07	3.21833e+07	3.21768e+07	3.18891e+07	3.14958e+07	3.10355e+07	3.05492e+07	3.00298e+07	2.94709e+07	2.86983e+07	2.78565e+07	2.69604e+07	2.52864e+07	2.34883e+07	2.17372e+07	1.98678e+07	1.78724e+07	1.57442e+07	1.34743e+07	1.10349e+07	8.44362e+06	5.68806e+06	3.78721e+06	3.06513e+06	2.29046e+06	1.46933e+06	1.32484e+06	1.17047e+06	1.00547e+06	827377	638554	438194	225570	0
Women	2.27713e+07	2.34173e+07	2.39436e+07	2.44972e+07	2.50674e+07	2.56471e+07	2.6015e+07	2.63895e+07	2.67689e+07	2.6738e+07	2.64618e+07	2.61082e+07	2.57167e+07	2.53023e+07	2.48587e+07	2.43805e+07	2.37354e+07	2.30327e+07	2.22831e+07	2.08645e+07	1.9341e+07	1.79026e+07	1.63685e+07	1.47328e+07	1.29898e+07	1.11327e+07	9.14195e+06	7.02828e+06	4.78197e+06	3.23349e+06	2.62226e+06	1.96734e+06	1.27313e+06	1.14802e+06	1.01429e+06	871302	717203	553663	380013	195650	0
Total	4.98846e+07	5.13079e+07	5.24951e+07	5.37466e+07	5.50402e+07	5.63613e+07	5.72048e+07	5.80701e+07	5.89522e+07	5.89148e+07	5.83508e+07	5.7604e+07	5.67522e+07	5.58515e+07	5.48885e+07	5.38514e+07	5.24337e+07	5.08892e+07	4.92435e+07	4.61509e+07	4.28293e+07	3.96398e+07	3.62363e+07	3.26052e+07	2.8734e+07	2.4607e+07	2.01768e+07	1.54719e+07	1.047e+07	7.0207e+06	5.6874e+06	4.2578e+06	2.74246e+06	2.47286e+06	2.18475e+06	1.87677e+06	1.54458e+06	1.19222e+06	818207	421221	0
MEN
Afghanistan	0	0	0	0	0	0	0	0	0	0	0	0	0	0	0	0	0	0	0	0	0	0	0	0	0	0	0	0	0	0	0	0	0	0	0	0	0	0	0	0	0
Albania	0	0	0	0	0	0	0	0	0	0	0	0	0	0	0	0	0	0	0	0	0	0	0	0	0	0	0	0	0	0	0	0	0	0	0	0	0	0	0	0	0
Algeria	0	0	0	0	0	0	0	0	0	0	0	0	0	0	0	0	0	0	0	0	0	0	0	0	0	0	0	0	0	0	0	0	0	0	0	0	0	0	0	0	0
Angola	450304	462437	476753	492578	509071	525759	539635	553980	569296	586192	604968	623682	644811	667826	692124	717345	707639	697032	685338	672490	658399	604406	547008	485504	419214	347627	269983	186403	96553.4	0	0	0	0	0	0	0	0	0	0	0	0
Antigua and Barbuda	0	0	0	0	0	0	0	0	0	0	0	0	0	0	0	0	0	0	0	0	0	0	0	0	0	0	0	0	0	0	0	0	0	0	0	0	0	0	0	0	0
Argentina	0	0	0	0	0	0	0	0	0	0	0	0	0	0	0	0	0	0	0	0	0	0	0	0	0	0	0	0	0	0	0	0	0	0	0	0	0	0	0	0	0
Armenia	0	0	0	0	0	0	0	0	0	0	0	0	0	0	0	0	0	0	0	0	0	0	0	0	0	0	0	0	0	0	0	0	0	0	0	0	0	0	0	0	0
Australia	0	0	0	0	0	0	0	0	0	0	0	0	0	0	0	0	0	0	0	0	0	0	0	0	0	0	0	0	0	0	0	0	0	0	0	0	0	0	0	0	0
Austria	0	0	0	0	0	0	0	0	0	0	0	0	0	0	0	0	0	0	0	0	0	0	0	0	0	0	0	0	0	0	0	0	0	0	0	0	0	0	0	0	0
Azerbaijan	0	0	0	0	0	0	0	0	0	0	0	0	0	0	0	0	0	0	0	0	0	0	0	0	0	0	0	0	0	0	0	0	0	0	0	0	0	0	0	0	0
Bahrain	0	0	0	0	0	0	0	0	0	0	0	0	0	0	0	0	0	0	0	0	0	0	0	0	0	0	0	0	0	0	0	0	0	0	0	0	0	0	0	0	0
Bangladesh	0	0	0	0	0	0	0	0	0	0	0	0	0	0	0	0	0	0	0	0	0	0	0	0	0	0	0	0	0	0	0	0	0	0	0	0	0	0	0	0	0
Barbados	0	0	0	0	0	0	0	0	0	0	0	0	0	0	0	0	0	0	0	0	0	0	0	0	0	0	0	0	0	0	0	0	0	0	0	0	0	0	0	0	0
Belarus	0	0	0	0	0	0	0	0	0	0	0	0	0	0	0	0	0	0	0	0	0	0	0	0	0	0	0	0	0	0	0	0	0	0	0	0	0	0	0	0	0
Belgium	0	0	0	0	0	0	0	0	0	0	0	0	0	0	0	0	0	0	0	0	0	0	0	0	0	0	0	0	0	0	0	0	0	0	0	0	0	0	0	0	0
Belize	0	0	0	0	0	0	0	0	0	0	0	0	0	0	0	0	0	0	0	0	0	0	0	0	0	0	0	0	0	0	0	0	0	0	0	0	0	0	0	0	0
Benin	631278	657086	653225	648363	641004	630318	611386	589916	566564	542049	516635	490936	463568	433814	400998	364661	323600	279107	230898	178744	122476	110676	97953	84278.3	69620.2	53928.1	37098.4	19144.9	0	0	0	0	0	0	0	0	0	0	0	0	0
Bhutan	0	0	0	0	0	0	0	0	0	0	0	0	0	0	0	0	0	0	0	0	0	0	0	0	0	0	0	0	0	0	0	0	0	0	0	0	0	0	0	0	0
Bolivia	0	0	0	0	0	0	0	0	0	0	0	0	0	0	0	0	0	0	0	0	0	0	0	0	0	0	0	0	0	0	0	0	0	0	0	0	0	0	0	0	0
Bosnia and Herzegovina	0	0	0	0	0	0	0	0	0	0	0	0	0	0	0	0	0	0	0	0	0	0	0	0	0	0	0	0	0	0	0	0	0	0	0	0	0	0	0	0	0
Botswana	0	0	0	0	0	0	0	0	0	0	0	0	0	0	0	0	0	0	0	0	0	0	0	0	0	0	0	0	0	0	0	0	0	0	0	0	0	0	0	0	0
Brazil	0	0	0	0	0	0	0	0	0	0	0	0	0	0	0	0	0	0	0	0	0	0	0	0	0	0	0	0	0	0	0	0	0	0	0	0	0	0	0	0	0
Brunei	0	0	0	0	0	0	0	0	0	0	0	0	0	0	0	0	0	0	0	0	0	0	0	0	0	0	0	0	0	0	0	0	0	0	0	0	0	0	0	0	0
Bulgaria	0	0	0	0	0	0	0	0	0	0	0	0	0	0	0	0	0	0	0	0	0	0	0	0	0	0	0	0	0	0	0	0	0	0	0	0	0	0	0	0	0
Burkina Faso	556863	570735	527210	481629	433624	382821	327843	269918	208570	143367	73952.4	0	0	0	0	0	0	0	0	0	0	0	0	0	0	0	0	0	0	0	0	0	0	0	0	0	0	0	0	0	0
Burundi	166304	168240	170198	172243	174430	176851	179421	182174	185400	189445	194522	202720	212070	222319	233075	244015	235828	226229	215125	202472	188257	169601	149666	128380	105697	81588.7	55905.8	28748.4	0	0	0	0	0	0	0	0	0	0	0	0	0
Cambodia	0	0	0	0	0	0	0	0	0	0	0	0	0	0	0	0	0	0	0	0	0	0	0	0	0	0	0	0	0	0	0	0	0	0	0	0	0	0	0	0	0
Cameroon	3.58882e+06	3.68885e+06	3.7945e+06	3.90596e+06	4.02393e+06	4.14878e+06	4.26944e+06	4.39776e+06	4.53343e+06	4.67556e+06	4.63119e+06	4.56995e+06	4.50225e+06	4.42776e+06	4.34639e+06	4.25753e+06	4.15056e+06	4.03747e+06	3.91603e+06	3.78402e+06	3.6402e+06	3.43367e+06	3.21305e+06	2.97731e+06	2.72569e+06	2.45713e+06	2.16733e+06	1.8594e+06	1.53192e+06	1.18349e+06	812832	418220	0	0	0	0	0	0	0	0	0
Canada	0	0	0	0	0	0	0	0	0	0	0	0	0	0	0	0	0	0	0	0	0	0	0	0	0	0	0	0	0	0	0	0	0	0	0	0	0	0	0	0	0
Cape Verde	0	0	0	0	0	0	0	0	0	0	0	0	0	0	0	0	0	0	0	0	0	0	0	0	0	0	0	0	0	0	0	0	0	0	0	0	0	0	0	0	0
Central African Republic	267656	273333	279917	287198	294860	302679	309637	316652	323760	331057	324375	315484	306463	297254	287787	278059	268106	257948	247449	236478	224915	211317	196941	181756	165743	148841	130600	111530	91481.3	70336.6	48051.3	24590.5	0	0	0	0	0	0	0	0	0
Chad	604525	620599	637731	656062	675798	697067	717164	739254	763442	755147	746574	735502	724203	711735	697252	680318	658332	633971	607341	578532	547472	494564	438117	377643	312677	242810	167295	86516.8	0	0	0	0	0	0	0	0	0	0	0	0	0
Chile	0	0	0	0	0	0	0	0	0	0	0	0	0	0	0	0	0	0	0	0	0	0	0	0	0	0	0	0	0	0	0	0	0	0	0	0	0	0	0	0	0
China	0	0	0	0	0	0	0	0	0	0	0	0	0	0	0	0	0	0	0	0	0	0	0	0	0	0	0	0	0	0	0	0	0	0	0	0	0	0	0	0	0
Colombia	0	0	0	0	0	0	0	0	0	0	0	0	0	0	0	0	0	0	0	0	0	0	0	0	0	0	0	0	0	0	0	0	0	0	0	0	0	0	0	0	0
Comoros	0	0	0	0	0	0	0	0	0	0	0	0	0	0	0	0	0	0	0	0	0	0	0	0	0	0	0	0	0	0	0	0	0	0	0	0	0	0	0	0	0
Congo	211238	217531	224124	231042	238291	245864	253584	261622	269861	278174	286475	293468	283700	273362	262578	251395	240169	228332	215633	201849	186839	167650	147291	125784	103142	79333.4	54202	27803	0	0	0	0	0	0	0	0	0	0	0	0	0
Costa Rica	0	0	0	0	0	0	0	0	0	0	0	0	0	0	0	0	0	0	0	0	0	0	0	0	0	0	0	0	0	0	0	0	0	0	0	0	0	0	0	0	0
Côte d’Ivoire	1.81446e+06	1.8799e+06	1.94922e+06	2.02164e+06	2.09583e+06	2.17057e+06	2.08639e+06	1.99311e+06	1.88985e+06	1.77603e+06	1.65167e+06	1.50777e+06	1.35699e+06	1.20097e+06	1.04103e+06	877851	713206	543671	368803	187870	0	0	0	0	0	0	0	0	0	0	0	0	0	0	0	0	0	0	0	0	0
Croatia	0	0	0	0	0	0	0	0	0	0	0	0	0	0	0	0	0	0	0	0	0	0	0	0	0	0	0	0	0	0	0	0	0	0	0	0	0	0	0	0	0
Cuba	0	0	0	0	0	0	0	0	0	0	0	0	0	0	0	0	0	0	0	0	0	0	0	0	0	0	0	0	0	0	0	0	0	0	0	0	0	0	0	0	0
Cyprus	0	0	0	0	0	0	0	0	0	0	0	0	0	0	0	0	0	0	0	0	0	0	0	0	0	0	0	0	0	0	0	0	0	0	0	0	0	0	0	0	0
Czech Republic	0	0	0	0	0	0	0	0	0	0	0	0	0	0	0	0	0	0	0	0	0	0	0	0	0	0	0	0	0	0	0	0	0	0	0	0	0	0	0	0	0
Democratic Republic of the Congo	1.91423e+06	1.98137e+06	2.05574e+06	2.13312e+06	2.20915e+06	2.28171e+06	2.33411e+06	2.38313e+06	2.43269e+06	2.48704e+06	2.54886e+06	2.61375e+06	2.61001e+06	2.60929e+06	2.60952e+06	2.60915e+06	2.59783e+06	2.58763e+06	2.57712e+06	2.56472e+06	2.54949e+06	2.49476e+06	2.43628e+06	2.37322e+06	2.30497e+06	2.23089e+06	2.14418e+06	2.05191e+06	1.95312e+06	1.84689e+06	1.73246e+06	1.60486e+06	1.46933e+06	1.32484e+06	1.17047e+06	1.00547e+06	827377	638554	438194	225570	0
Denmark	0	0	0	0	0	0	0	0	0	0	0	0	0	0	0	0	0	0	0	0	0	0	0	0	0	0	0	0	0	0	0	0	0	0	0	0	0	0	0	0	0
Djibouti	0	0	0	0	0	0	0	0	0	0	0	0	0	0	0	0	0	0	0	0	0	0	0	0	0	0	0	0	0	0	0	0	0	0	0	0	0	0	0	0	0
Dominican Republic	0	0	0	0	0	0	0	0	0	0	0	0	0	0	0	0	0	0	0	0	0	0	0	0	0	0	0	0	0	0	0	0	0	0	0	0	0	0	0	0	0
Ecuador	0	0	0	0	0	0	0	0	0	0	0	0	0	0	0	0	0	0	0	0	0	0	0	0	0	0	0	0	0	0	0	0	0	0	0	0	0	0	0	0	0
Egypt	0	0	0	0	0	0	0	0	0	0	0	0	0	0	0	0	0	0	0	0	0	0	0	0	0	0	0	0	0	0	0	0	0	0	0	0	0	0	0	0	0
El Salvador	0	0	0	0	0	0	0	0	0	0	0	0	0	0	0	0	0	0	0	0	0	0	0	0	0	0	0	0	0	0	0	0	0	0	0	0	0	0	0	0	0
Equatorial Guinea	862712	879285	898243	919145	941625	965665	991625	1.01929e+06	1.04959e+06	1.08362e+06	1.08713e+06	1.08838e+06	1.09157e+06	1.09537e+06	1.09793e+06	1.09816e+06	1.09157e+06	1.08294e+06	1.0723e+06	1.06001e+06	1.04613e+06	987204	924904	858244	786342	708831	624613	534998	439885	339171	232555	119382	0	0	0	0	0	0	0	0	0
Eritrea	0	0	0	0	0	0	0	0	0	0	0	0	0	0	0	0	0	0	0	0	0	0	0	0	0	0	0	0	0	0	0	0	0	0	0	0	0	0	0	0	0
Estonia	0	0	0	0	0	0	0	0	0	0	0	0	0	0	0	0	0	0	0	0	0	0	0	0	0	0	0	0	0	0	0	0	0	0	0	0	0	0	0	0	0
Ethiopia	934608	964138	995918	1.02949e+06	1.06428e+06	1.0999e+06	1.13291e+06	1.1664e+06	1.20065e+06	1.23641e+06	1.27434e+06	1.31033e+06	1.28375e+06	1.25575e+06	1.22517e+06	1.19159e+06	1.15496e+06	1.11529e+06	1.07269e+06	1.02713e+06	978152	929274	875917	817562	753648	683700	606568	523171	433060	335879	231406	119396	0	0	0	0	0	0	0	0	0
Federated States of Micronesia	0	0	0	0	0	0	0	0	0	0	0	0	0	0	0	0	0	0	0	0	0	0	0	0	0	0	0	0	0	0	0	0	0	0	0	0	0	0	0	0	0
Fiji	0	0	0	0	0	0	0	0	0	0	0	0	0	0	0	0	0	0	0	0	0	0	0	0	0	0	0	0	0	0	0	0	0	0	0	0	0	0	0	0	0
Finland	0	0	0	0	0	0	0	0	0	0	0	0	0	0	0	0	0	0	0	0	0	0	0	0	0	0	0	0	0	0	0	0	0	0	0	0	0	0	0	0	0
France	0	0	0	0	0	0	0	0	0	0	0	0	0	0	0	0	0	0	0	0	0	0	0	0	0	0	0	0	0	0	0	0	0	0	0	0	0	0	0	0	0
Gabon	0	0	0	0	0	0	0	0	0	0	0	0	0	0	0	0	0	0	0	0	0	0	0	0	0	0	0	0	0	0	0	0	0	0	0	0	0	0	0	0	0
Georgia	0	0	0	0	0	0	0	0	0	0	0	0	0	0	0	0	0	0	0	0	0	0	0	0	0	0	0	0	0	0	0	0	0	0	0	0	0	0	0	0	0
Germany	0	0	0	0	0	0	0	0	0	0	0	0	0	0	0	0	0	0	0	0	0	0	0	0	0	0	0	0	0	0	0	0	0	0	0	0	0	0	0	0	0
Ghana	994833	1.02486e+06	1.0017e+06	976200	948031	917028	881052	842544	801360	757255	710030	659169	604756	546907	485724	421078	352054	279453	202829	121805	36183.8	34060.6	31796.2	29381.4	26811.7	24082.9	21184.7	18115.5	14870.7	11444.7	7829.68	4015.84	0	0	0	0	0	0	0	0	0
Greece	0	0	0	0	0	0	0	0	0	0	0	0	0	0	0	0	0	0	0	0	0	0	0	0	0	0	0	0	0	0	0	0	0	0	0	0	0	0	0	0	0
Grenada	0	0	0	0	0	0	0	0	0	0	0	0	0	0	0	0	0	0	0	0	0	0	0	0	0	0	0	0	0	0	0	0	0	0	0	0	0	0	0	0	0
Guatemala	0	0	0	0	0	0	0	0	0	0	0	0	0	0	0	0	0	0	0	0	0	0	0	0	0	0	0	0	0	0	0	0	0	0	0	0	0	0	0	0	0
Guinea	354360	372612	394220	417291	439642	460033	446016	427885	406977	384592	361428	336410	310610	284073	256773	228561	199213	168671	136480	102282	65869.2	59318.8	52351.9	44932	37027.7	28610.1	19630.1	10103.5	0	0	0	0	0	0	0	0	0	0	0	0	0
Guinea-Bissau	48160.7	49470.8	45582.1	41398.4	37048.9	32553.9	27719.4	22718.2	17487.5	11971.2	6145.72	0	0	0	0	0	0	0	0	0	0	0	0	0	0	0	0	0	0	0	0	0	0	0	0	0	0	0	0	0	0
Guyana	0	0	0	0	0	0	0	0	0	0	0	0	0	0	0	0	0	0	0	0	0	0	0	0	0	0	0	0	0	0	0	0	0	0	0	0	0	0	0	0	0
Haiti	0	0	0	0	0	0	0	0	0	0	0	0	0	0	0	0	0	0	0	0	0	0	0	0	0	0	0	0	0	0	0	0	0	0	0	0	0	0	0	0	0
Honduras	0	0	0	0	0	0	0	0	0	0	0	0	0	0	0	0	0	0	0	0	0	0	0	0	0	0	0	0	0	0	0	0	0	0	0	0	0	0	0	0	0
Hungary	0	0	0	0	0	0	0	0	0	0	0	0	0	0	0	0	0	0	0	0	0	0	0	0	0	0	0	0	0	0	0	0	0	0	0	0	0	0	0	0	0
Iceland	0	0	0	0	0	0	0	0	0	0	0	0	0	0	0	0	0	0	0	0	0	0	0	0	0	0	0	0	0	0	0	0	0	0	0	0	0	0	0	0	0
India	0	0	0	0	0	0	0	0	0	0	0	0	0	0	0	0	0	0	0	0	0	0	0	0	0	0	0	0	0	0	0	0	0	0	0	0	0	0	0	0	0
Indonesia	0	0	0	0	0	0	0	0	0	0	0	0	0	0	0	0	0	0	0	0	0	0	0	0	0	0	0	0	0	0	0	0	0	0	0	0	0	0	0	0	0
Iran	0	0	0	0	0	0	0	0	0	0	0	0	0	0	0	0	0	0	0	0	0	0	0	0	0	0	0	0	0	0	0	0	0	0	0	0	0	0	0	0	0
Iraq	0	0	0	0	0	0	0	0	0	0	0	0	0	0	0	0	0	0	0	0	0	0	0	0	0	0	0	0	0	0	0	0	0	0	0	0	0	0	0	0	0
Ireland	0	0	0	0	0	0	0	0	0	0	0	0	0	0	0	0	0	0	0	0	0	0	0	0	0	0	0	0	0	0	0	0	0	0	0	0	0	0	0	0	0
Israel	0	0	0	0	0	0	0	0	0	0	0	0	0	0	0	0	0	0	0	0	0	0	0	0	0	0	0	0	0	0	0	0	0	0	0	0	0	0	0	0	0
Italy	0	0	0	0	0	0	0	0	0	0	0	0	0	0	0	0	0	0	0	0	0	0	0	0	0	0	0	0	0	0	0	0	0	0	0	0	0	0	0	0	0
Jamaica	0	0	0	0	0	0	0	0	0	0	0	0	0	0	0	0	0	0	0	0	0	0	0	0	0	0	0	0	0	0	0	0	0	0	0	0	0	0	0	0	0
Japan	0	0	0	0	0	0	0	0	0	0	0	0	0	0	0	0	0	0	0	0	0	0	0	0	0	0	0	0	0	0	0	0	0	0	0	0	0	0	0	0	0
Jordan	0	0	0	0	0	0	0	0	0	0	0	0	0	0	0	0	0	0	0	0	0	0	0	0	0	0	0	0	0	0	0	0	0	0	0	0	0	0	0	0	0
Kazakhstan	0	0	0	0	0	0	0	0	0	0	0	0	0	0	0	0	0	0	0	0	0	0	0	0	0	0	0	0	0	0	0	0	0	0	0	0	0	0	0	0	0
Kenya	0	0	0	0	0	0	0	0	0	0	0	0	0	0	0	0	0	0	0	0	0	0	0	0	0	0	0	0	0	0	0	0	0	0	0	0	0	0	0	0	0
Kiribati	0	0	0	0	0	0	0	0	0	0	0	0	0	0	0	0	0	0	0	0	0	0	0	0	0	0	0	0	0	0	0	0	0	0	0	0	0	0	0	0	0
Kuwait	0	0	0	0	0	0	0	0	0	0	0	0	0	0	0	0	0	0	0	0	0	0	0	0	0	0	0	0	0	0	0	0	0	0	0	0	0	0	0	0	0
Kyrgyzstan	0	0	0	0	0	0	0	0	0	0	0	0	0	0	0	0	0	0	0	0	0	0	0	0	0	0	0	0	0	0	0	0	0	0	0	0	0	0	0	0	0
Laos	0	0	0	0	0	0	0	0	0	0	0	0	0	0	0	0	0	0	0	0	0	0	0	0	0	0	0	0	0	0	0	0	0	0	0	0	0	0	0	0	0
Latvia	0	0	0	0	0	0	0	0	0	0	0	0	0	0	0	0	0	0	0	0	0	0	0	0	0	0	0	0	0	0	0	0	0	0	0	0	0	0	0	0	0
Lebanon	0	0	0	0	0	0	0	0	0	0	0	0	0	0	0	0	0	0	0	0	0	0	0	0	0	0	0	0	0	0	0	0	0	0	0	0	0	0	0	0	0
Lesotho	0	0	0	0	0	0	0	0	0	0	0	0	0	0	0	0	0	0	0	0	0	0	0	0	0	0	0	0	0	0	0	0	0	0	0	0	0	0	0	0	0
Liberia	222550	219119	216121	214958	217286	223847	237430	256451	278130	299111	317352	328765	336726	343106	350300	359813	372442	358316	343156	325591	305040	280184	252635	222844	191140	157545	121768	83712.2	43180.9	0	0	0	0	0	0	0	0	0	0	0	0
Libya	0	0	0	0	0	0	0	0	0	0	0	0	0	0	0	0	0	0	0	0	0	0	0	0	0	0	0	0	0	0	0	0	0	0	0	0	0	0	0	0	0
Lithuania	0	0	0	0	0	0	0	0	0	0	0	0	0	0	0	0	0	0	0	0	0	0	0	0	0	0	0	0	0	0	0	0	0	0	0	0	0	0	0	0	0
Luxembourg	0	0	0	0	0	0	0	0	0	0	0	0	0	0	0	0	0	0	0	0	0	0	0	0	0	0	0	0	0	0	0	0	0	0	0	0	0	0	0	0	0
Macedonia	0	0	0	0	0	0	0	0	0	0	0	0	0	0	0	0	0	0	0	0	0	0	0	0	0	0	0	0	0	0	0	0	0	0	0	0	0	0	0	0	0
Madagascar	0	0	0	0	0	0	0	0	0	0	0	0	0	0	0	0	0	0	0	0	0	0	0	0	0	0	0	0	0	0	0	0	0	0	0	0	0	0	0	0	0
Malawi	112401	115513	117544	119014	120601	122740	124494	127125	124904	122631	120098	117199	114108	110884	107578	104180	100658	96878	92819.3	88479.5	83830.2	75645	67039.7	57834.4	47874.9	37112.3	25594.5	13211.3	0	0	0	0	0	0	0	0	0	0	0	0	0
Malaysia	0	0	0	0	0	0	0	0	0	0	0	0	0	0	0	0	0	0	0	0	0	0	0	0	0	0	0	0	0	0	0	0	0	0	0	0	0	0	0	0	0
Maldives	0	0	0	0	0	0	0	0	0	0	0	0	0	0	0	0	0	0	0	0	0	0	0	0	0	0	0	0	0	0	0	0	0	0	0	0	0	0	0	0	0
Mali	151905	154772	142593	130178	117177	103376	88362.1	72585.5	55957.2	38390.1	19778	0	0	0	0	0	0	0	0	0	0	0	0	0	0	0	0	0	0	0	0	0	0	0	0	0	0	0	0	0	0
Malta	0	0	0	0	0	0	0	0	0	0	0	0	0	0	0	0	0	0	0	0	0	0	0	0	0	0	0	0	0	0	0	0	0	0	0	0	0	0	0	0	0
Mauritania	0	0	0	0	0	0	0	0	0	0	0	0	0	0	0	0	0	0	0	0	0	0	0	0	0	0	0	0	0	0	0	0	0	0	0	0	0	0	0	0	0
Mauritius	0	0	0	0	0	0	0	0	0	0	0	0	0	0	0	0	0	0	0	0	0	0	0	0	0	0	0	0	0	0	0	0	0	0	0	0	0	0	0	0	0
Mexico	0	0	0	0	0	0	0	0	0	0	0	0	0	0	0	0	0	0	0	0	0	0	0	0	0	0	0	0	0	0	0	0	0	0	0	0	0	0	0	0	0
Moldova	0	0	0	0	0	0	0	0	0	0	0	0	0	0	0	0	0	0	0	0	0	0	0	0	0	0	0	0	0	0	0	0	0	0	0	0	0	0	0	0	0
Mongolia	0	0	0	0	0	0	0	0	0	0	0	0	0	0	0	0	0	0	0	0	0	0	0	0	0	0	0	0	0	0	0	0	0	0	0	0	0	0	0	0	0
Montenegro	0	0	0	0	0	0	0	0	0	0	0	0	0	0	0	0	0	0	0	0	0	0	0	0	0	0	0	0	0	0	0	0	0	0	0	0	0	0	0	0	0
Morocco	0	0	0	0	0	0	0	0	0	0	0	0	0	0	0	0	0	0	0	0	0	0	0	0	0	0	0	0	0	0	0	0	0	0	0	0	0	0	0	0	0
Mozambique	0	0	0	0	0	0	0	0	0	0	0	0	0	0	0	0	0	0	0	0	0	0	0	0	0	0	0	0	0	0	0	0	0	0	0	0	0	0	0	0	0
Myanmar	0	0	0	0	0	0	0	0	0	0	0	0	0	0	0	0	0	0	0	0	0	0	0	0	0	0	0	0	0	0	0	0	0	0	0	0	0	0	0	0	0
Namibia	0	0	0	0	0	0	0	0	0	0	0	0	0	0	0	0	0	0	0	0	0	0	0	0	0	0	0	0	0	0	0	0	0	0	0	0	0	0	0	0	0
Nepal	0	0	0	0	0	0	0	0	0	0	0	0	0	0	0	0	0	0	0	0	0	0	0	0	0	0	0	0	0	0	0	0	0	0	0	0	0	0	0	0	0
Netherlands	0	0	0	0	0	0	0	0	0	0	0	0	0	0	0	0	0	0	0	0	0	0	0	0	0	0	0	0	0	0	0	0	0	0	0	0	0	0	0	0	0
New Zealand	0	0	0	0	0	0	0	0	0	0	0	0	0	0	0	0	0	0	0	0	0	0	0	0	0	0	0	0	0	0	0	0	0	0	0	0	0	0	0	0	0
Nicaragua	0	0	0	0	0	0	0	0	0	0	0	0	0	0	0	0	0	0	0	0	0	0	0	0	0	0	0	0	0	0	0	0	0	0	0	0	0	0	0	0	0
Niger	13667.4	14106.4	13163.1	12167.4	11087.3	9903.38	8596.65	7161.09	5588.16	3873.35	2012.84	0	0	0	0	0	0	0	0	0	0	0	0	0	0	0	0	0	0	0	0	0	0	0	0	0	0	0	0	0	0
Nigeria	8.14725e+06	8.36427e+06	8.59381e+06	8.83593e+06	9.09063e+06	9.35742e+06	9.6096e+06	9.87656e+06	1.01562e+07	9.99376e+06	9.81327e+06	9.58759e+06	9.3485e+06	9.09329e+06	8.81989e+06	8.52664e+06	8.20132e+06	7.85902e+06	7.49654e+06	7.11094e+06	6.70001e+06	6.11386e+06	5.49329e+06	4.83647e+06	4.14174e+06	3.40659e+06	2.62514e+06	1.79989e+06	926143	0	0	0	0	0	0	0	0	0	0	0	0
North Korea	0	0	0	0	0	0	0	0	0	0	0	0	0	0	0	0	0	0	0	0	0	0	0	0	0	0	0	0	0	0	0	0	0	0	0	0	0	0	0	0	0
Norway	0	0	0	0	0	0	0	0	0	0	0	0	0	0	0	0	0	0	0	0	0	0	0	0	0	0	0	0	0	0	0	0	0	0	0	0	0	0	0	0	0
Oman	0	0	0	0	0	0	0	0	0	0	0	0	0	0	0	0	0	0	0	0	0	0	0	0	0	0	0	0	0	0	0	0	0	0	0	0	0	0	0	0	0
Pakistan	0	0	0	0	0	0	0	0	0	0	0	0	0	0	0	0	0	0	0	0	0	0	0	0	0	0	0	0	0	0	0	0	0	0	0	0	0	0	0	0	0
Palestine	0	0	0	0	0	0	0	0	0	0	0	0	0	0	0	0	0	0	0	0	0	0	0	0	0	0	0	0	0	0	0	0	0	0	0	0	0	0	0	0	0
Panama	0	0	0	0	0	0	0	0	0	0	0	0	0	0	0	0	0	0	0	0	0	0	0	0	0	0	0	0	0	0	0	0	0	0	0	0	0	0	0	0	0
Papua New Guinea	0	0	0	0	0	0	0	0	0	0	0	0	0	0	0	0	0	0	0	0	0	0	0	0	0	0	0	0	0	0	0	0	0	0	0	0	0	0	0	0	0
Paraguay	0	0	0	0	0	0	0	0	0	0	0	0	0	0	0	0	0	0	0	0	0	0	0	0	0	0	0	0	0	0	0	0	0	0	0	0	0	0	0	0	0
Peru	0	0	0	0	0	0	0	0	0	0	0	0	0	0	0	0	0	0	0	0	0	0	0	0	0	0	0	0	0	0	0	0	0	0	0	0	0	0	0	0	0
Philippines	0	0	0	0	0	0	0	0	0	0	0	0	0	0	0	0	0	0	0	0	0	0	0	0	0	0	0	0	0	0	0	0	0	0	0	0	0	0	0	0	0
Poland	0	0	0	0	0	0	0	0	0	0	0	0	0	0	0	0	0	0	0	0	0	0	0	0	0	0	0	0	0	0	0	0	0	0	0	0	0	0	0	0	0
Portugal	0	0	0	0	0	0	0	0	0	0	0	0	0	0	0	0	0	0	0	0	0	0	0	0	0	0	0	0	0	0	0	0	0	0	0	0	0	0	0	0	0
Qatar	0	0	0	0	0	0	0	0	0	0	0	0	0	0	0	0	0	0	0	0	0	0	0	0	0	0	0	0	0	0	0	0	0	0	0	0	0	0	0	0	0
Romania	0	0	0	0	0	0	0	0	0	0	0	0	0	0	0	0	0	0	0	0	0	0	0	0	0	0	0	0	0	0	0	0	0	0	0	0	0	0	0	0	0
Russia	0	0	0	0	0	0	0	0	0	0	0	0	0	0	0	0	0	0	0	0	0	0	0	0	0	0	0	0	0	0	0	0	0	0	0	0	0	0	0	0	0
Rwanda	0	0	0	0	0	0	0	0	0	0	0	0	0	0	0	0	0	0	0	0	0	0	0	0	0	0	0	0	0	0	0	0	0	0	0	0	0	0	0	0	0
Saint Lucia	0	0	0	0	0	0	0	0	0	0	0	0	0	0	0	0	0	0	0	0	0	0	0	0	0	0	0	0	0	0	0	0	0	0	0	0	0	0	0	0	0
Saint Vincent and the Grenadines	0	0	0	0	0	0	0	0	0	0	0	0	0	0	0	0	0	0	0	0	0	0	0	0	0	0	0	0	0	0	0	0	0	0	0	0	0	0	0	0	0
Samoa	0	0	0	0	0	0	0	0	0	0	0	0	0	0	0	0	0	0	0	0	0	0	0	0	0	0	0	0	0	0	0	0	0	0	0	0	0	0	0	0	0
São Tomé and Príncipe	0	0	0	0	0	0	0	0	0	0	0	0	0	0	0	0	0	0	0	0	0	0	0	0	0	0	0	0	0	0	0	0	0	0	0	0	0	0	0	0	0
Saudi Arabia	0	0	0	0	0	0	0	0	0	0	0	0	0	0	0	0	0	0	0	0	0	0	0	0	0	0	0	0	0	0	0	0	0	0	0	0	0	0	0	0	0
Senegal	8148.1	8403.11	7811.95	7176.71	6486.2	5736.07	4898.14	4012.49	3081.88	2106.22	1081.19	0	0	0	0	0	0	0	0	0	0	0	0	0	0	0	0	0	0	0	0	0	0	0	0	0	0	0	0	0	0
Serbia	0	0	0	0	0	0	0	0	0	0	0	0	0	0	0	0	0	0	0	0	0	0	0	0	0	0	0	0	0	0	0	0	0	0	0	0	0	0	0	0	0
Seychelles	0	0	0	0	0	0	0	0	0	0	0	0	0	0	0	0	0	0	0	0	0	0	0	0	0	0	0	0	0	0	0	0	0	0	0	0	0	0	0	0	0
Sierra Leone	398780	399637	397975	395127	392651	391550	391485	393335	397735	405399	416509	432102	452520	475553	498579	520027	472823	419928	362625	301988	238380	213443	187290	159876	131113	100875	68835.9	35269.8	0	0	0	0	0	0	0	0	0	0	0	0	0
Singapore	0	0	0	0	0	0	0	0	0	0	0	0	0	0	0	0	0	0	0	0	0	0	0	0	0	0	0	0	0	0	0	0	0	0	0	0	0	0	0	0	0
Slovakia	0	0	0	0	0	0	0	0	0	0	0	0	0	0	0	0	0	0	0	0	0	0	0	0	0	0	0	0	0	0	0	0	0	0	0	0	0	0	0	0	0
Slovenia	0	0	0	0	0	0	0	0	0	0	0	0	0	0	0	0	0	0	0	0	0	0	0	0	0	0	0	0	0	0	0	0	0	0	0	0	0	0	0	0	0
Solomon Islands	0	0	0	0	0	0	0	0	0	0	0	0	0	0	0	0	0	0	0	0	0	0	0	0	0	0	0	0	0	0	0	0	0	0	0	0	0	0	0	0	0
Somalia	0	0	0	0	0	0	0	0	0	0	0	0	0	0	0	0	0	0	0	0	0	0	0	0	0	0	0	0	0	0	0	0	0	0	0	0	0	0	0	0	0
South Africa	0	0	0	0	0	0	0	0	0	0	0	0	0	0	0	0	0	0	0	0	0	0	0	0	0	0	0	0	0	0	0	0	0	0	0	0	0	0	0	0	0
South Korea	0	0	0	0	0	0	0	0	0	0	0	0	0	0	0	0	0	0	0	0	0	0	0	0	0	0	0	0	0	0	0	0	0	0	0	0	0	0	0	0	0
Spain	0	0	0	0	0	0	0	0	0	0	0	0	0	0	0	0	0	0	0	0	0	0	0	0	0	0	0	0	0	0	0	0	0	0	0	0	0	0	0	0	0
Sri Lanka	0	0	0	0	0	0	0	0	0	0	0	0	0	0	0	0	0	0	0	0	0	0	0	0	0	0	0	0	0	0	0	0	0	0	0	0	0	0	0	0	0
Sudan	3.36025e+06	3.46504e+06	3.57956e+06	3.7014e+06	3.82764e+06	3.95633e+06	4.07333e+06	4.19476e+06	4.32081e+06	4.45187e+06	4.58862e+06	4.7248e+06	4.86772e+06	5.01813e+06	5.17763e+06	5.34691e+06	5.51536e+06	5.69662e+06	5.88799e+06	5.37518e+06	4.81952e+06	4.35059e+06	3.84569e+06	3.3045e+06	2.72647e+06	2.10967e+06	1.44923e+06	746916	0	0	0	0	0	0	0	0	0	0	0	0	0
Suriname	0	0	0	0	0	0	0	0	0	0	0	0	0	0	0	0	0	0	0	0	0	0	0	0	0	0	0	0	0	0	0	0	0	0	0	0	0	0	0	0	0
Swaziland	0	0	0	0	0	0	0	0	0	0	0	0	0	0	0	0	0	0	0	0	0	0	0	0	0	0	0	0	0	0	0	0	0	0	0	0	0	0	0	0	0
Sweden	0	0	0	0	0	0	0	0	0	0	0	0	0	0	0	0	0	0	0	0	0	0	0	0	0	0	0	0	0	0	0	0	0	0	0	0	0	0	0	0	0
Switzerland	0	0	0	0	0	0	0	0	0	0	0	0	0	0	0	0	0	0	0	0	0	0	0	0	0	0	0	0	0	0	0	0	0	0	0	0	0	0	0	0	0
Syria	0	0	0	0	0	0	0	0	0	0	0	0	0	0	0	0	0	0	0	0	0	0	0	0	0	0	0	0	0	0	0	0	0	0	0	0	0	0	0	0	0
Tajikistan	0	0	0	0	0	0	0	0	0	0	0	0	0	0	0	0	0	0	0	0	0	0	0	0	0	0	0	0	0	0	0	0	0	0	0	0	0	0	0	0	0
Tanzania	766472	792573	821286	851704	882684	913577	940608	967419	994522	980678	965765	947793	928629	908159	886230	862651	836549	808833	779168	747317	713081	653224	589655	521729	448892	370788	287095	197566	101981	0	0	0	0	0	0	0	0	0	0	0	0
Thailand	0	0	0	0	0	0	0	0	0	0	0	0	0	0	0	0	0	0	0	0	0	0	0	0	0	0	0	0	0	0	0	0	0	0	0	0	0	0	0	0	0
The Bahamas	0	0	0	0	0	0	0	0	0	0	0	0	0	0	0	0	0	0	0	0	0	0	0	0	0	0	0	0	0	0	0	0	0	0	0	0	0	0	0	0	0
The Gambia	0	0	0	0	0	0	0	0	0	0	0	0	0	0	0	0	0	0	0	0	0	0	0	0	0	0	0	0	0	0	0	0	0	0	0	0	0	0	0	0	0
Timor-Leste	0	0	0	0	0	0	0	0	0	0	0	0	0	0	0	0	0	0	0	0	0	0	0	0	0	0	0	0	0	0	0	0	0	0	0	0	0	0	0	0	0
Togo	99965.4	102151	99169.9	96045.1	92840	89586.2	86456.3	83204.2	79772.2	76095.3	72117.4	67778.9	63103.1	58053.8	52598.3	46710.3	40309.5	33478	26185.7	18407	10123.7	9121.44	8049.05	6904.67	5686.86	4392.19	3013.1	1551.36	0	0	0	0	0	0	0	0	0	0	0	0	0
Tonga	0	0	0	0	0	0	0	0	0	0	0	0	0	0	0	0	0	0	0	0	0	0	0	0	0	0	0	0	0	0	0	0	0	0	0	0	0	0	0	0	0
Trinidad and Tobago	0	0	0	0	0	0	0	0	0	0	0	0	0	0	0	0	0	0	0	0	0	0	0	0	0	0	0	0	0	0	0	0	0	0	0	0	0	0	0	0	0
Tunisia	0	0	0	0	0	0	0	0	0	0	0	0	0	0	0	0	0	0	0	0	0	0	0	0	0	0	0	0	0	0	0	0	0	0	0	0	0	0	0	0	0
Turkey	0	0	0	0	0	0	0	0	0	0	0	0	0	0	0	0	0	0	0	0	0	0	0	0	0	0	0	0	0	0	0	0	0	0	0	0	0	0	0	0	0
Turkmenistan	0	0	0	0	0	0	0	0	0	0	0	0	0	0	0	0	0	0	0	0	0	0	0	0	0	0	0	0	0	0	0	0	0	0	0	0	0	0	0	0	0
Uganda	431493	444583	458189	472328	487071	502503	516586	531651	547760	564936	554162	542226	529429	515591	500590	484256	465710	445702	423920	400059	373905	344665	312865	278291	240741	199985	155594	107644	55867	0	0	0	0	0	0	0	0	0	0	0	0
Ukraine	0	0	0	0	0	0	0	0	0	0	0	0	0	0	0	0	0	0	0	0	0	0	0	0	0	0	0	0	0	0	0	0	0	0	0	0	0	0	0	0	0
United Arab Emirates	0	0	0	0	0	0	0	0	0	0	0	0	0	0	0	0	0	0	0	0	0	0	0	0	0	0	0	0	0	0	0	0	0	0	0	0	0	0	0	0	0
United Kingdom	0	0	0	0	0	0	0	0	0	0	0	0	0	0	0	0	0	0	0	0	0	0	0	0	0	0	0	0	0	0	0	0	0	0	0	0	0	0	0	0	0
United States	0	0	0	0	0	0	0	0	0	0	0	0	0	0	0	0	0	0	0	0	0	0	0	0	0	0	0	0	0	0	0	0	0	0	0	0	0	0	0	0	0
Uruguay	0	0	0	0	0	0	0	0	0	0	0	0	0	0	0	0	0	0	0	0	0	0	0	0	0	0	0	0	0	0	0	0	0	0	0	0	0	0	0	0	0
Uzbekistan	0	0	0	0	0	0	0	0	0	0	0	0	0	0	0	0	0	0	0	0	0	0	0	0	0	0	0	0	0	0	0	0	0	0	0	0	0	0	0	0	0
Vanuatu	0	0	0	0	0	0	0	0	0	0	0	0	0	0	0	0	0	0	0	0	0	0	0	0	0	0	0	0	0	0	0	0	0	0	0	0	0	0	0	0	0
Venezuela	0	0	0	0	0	0	0	0	0	0	0	0	0	0	0	0	0	0	0	0	0	0	0	0	0	0	0	0	0	0	0	0	0	0	0	0	0	0	0	0	0
Vietnam	0	0	0	0	0	0	0	0	0	0	0	0	0	0	0	0	0	0	0	0	0	0	0	0	0	0	0	0	0	0	0	0	0	0	0	0	0	0	0	0	0
Yemen	0	0	0	0	0	0	0	0	0	0	0	0	0	0	0	0	0	0	0	0	0	0	0	0	0	0	0	0	0	0	0	0	0	0	0	0	0	0	0	0	0
Zambia	0	0	0	0	0	0	0	0	0	0	0	0	0	0	0	0	0	0	0	0	0	0	0	0	0	0	0	0	0	0	0	0	0	0	0	0	0	0	0	0	0
Zimbabwe	0	0	0	0	0	0	0	0	0	0	0	0	0	0	0	0	0	0	0	0	0	0	0	0	0	0	0	0	0	0	0	0	0	0	0	0	0	0	0	0	0
	0	0	0	0	0	0	0	0	0	0	0	0	0	0	0	0	0	0	0	0	0	0	0	0	0	0	0	0	0	0	0	0	0	0	0	0	0	0	0	0	0
	0	0	0	0	0	0	0	0	0	0	0	0	0	0	0	0	0	0	0	0	0	0	0	0	0	0	0	0	0	0	0	0	0	0	0	0	0	0	0	0	0
	0	0	0	0	0	0	0	0	0	0	0	0	0	0	0	0	0	0	0	0	0	0	0	0	0	0	0	0	0	0	0	0	0	0	0	0	0	0	0	0	0
WOMEN	0	0	0	0	0	0	0	0	0	0	0	0	0	0	0	0	0	0	0	0	0	0	0	0	0	0	0	0	0	0	0	0	0	0	0	0	0	0	0	0	0
Afghanistan	0	0	0	0	0	0	0	0	0	0	0	0	0	0	0	0	0	0	0	0	0	0	0	0	0	0	0	0	0	0	0	0	0	0	0	0	0	0	0	0	0
Albania	0	0	0	0	0	0	0	0	0	0	0	0	0	0	0	0	0	0	0	0	0	0	0	0	0	0	0	0	0	0	0	0	0	0	0	0	0	0	0	0	0
Algeria	0	0	0	0	0	0	0	0	0	0	0	0	0	0	0	0	0	0	0	0	0	0	0	0	0	0	0	0	0	0	0	0	0	0	0	0	0	0	0	0	0
Angola	368753	378713	390412	403271	416565	429897	441067	452476	464584	477946	492836	507868	524796	543214	562646	582792	574698	565865	556127	545409	533637	489561	442725	392597	338665	280547	217715	150187	77723.9	0	0	0	0	0	0	0	0	0	0	0	0
Antigua and Barbuda	0	0	0	0	0	0	0	0	0	0	0	0	0	0	0	0	0	0	0	0	0	0	0	0	0	0	0	0	0	0	0	0	0	0	0	0	0	0	0	0	0
Argentina	0	0	0	0	0	0	0	0	0	0	0	0	0	0	0	0	0	0	0	0	0	0	0	0	0	0	0	0	0	0	0	0	0	0	0	0	0	0	0	0	0
Armenia	0	0	0	0	0	0	0	0	0	0	0	0	0	0	0	0	0	0	0	0	0	0	0	0	0	0	0	0	0	0	0	0	0	0	0	0	0	0	0	0	0
Australia	0	0	0	0	0	0	0	0	0	0	0	0	0	0	0	0	0	0	0	0	0	0	0	0	0	0	0	0	0	0	0	0	0	0	0	0	0	0	0	0	0
Austria	0	0	0	0	0	0	0	0	0	0	0	0	0	0	0	0	0	0	0	0	0	0	0	0	0	0	0	0	0	0	0	0	0	0	0	0	0	0	0	0	0
Azerbaijan	0	0	0	0	0	0	0	0	0	0	0	0	0	0	0	0	0	0	0	0	0	0	0	0	0	0	0	0	0	0	0	0	0	0	0	0	0	0	0	0	0
Bahrain	0	0	0	0	0	0	0	0	0	0	0	0	0	0	0	0	0	0	0	0	0	0	0	0	0	0	0	0	0	0	0	0	0	0	0	0	0	0	0	0	0
Bangladesh	0	0	0	0	0	0	0	0	0	0	0	0	0	0	0	0	0	0	0	0	0	0	0	0	0	0	0	0	0	0	0	0	0	0	0	0	0	0	0	0	0
Barbados	0	0	0	0	0	0	0	0	0	0	0	0	0	0	0	0	0	0	0	0	0	0	0	0	0	0	0	0	0	0	0	0	0	0	0	0	0	0	0	0	0
Belarus	0	0	0	0	0	0	0	0	0	0	0	0	0	0	0	0	0	0	0	0	0	0	0	0	0	0	0	0	0	0	0	0	0	0	0	0	0	0	0	0	0
Belgium	0	0	0	0	0	0	0	0	0	0	0	0	0	0	0	0	0	0	0	0	0	0	0	0	0	0	0	0	0	0	0	0	0	0	0	0	0	0	0	0	0
Belize	0	0	0	0	0	0	0	0	0	0	0	0	0	0	0	0	0	0	0	0	0	0	0	0	0	0	0	0	0	0	0	0	0	0	0	0	0	0	0	0	0
Benin	591038	610735	602171	592631	581395	568064	550322	530849	509842	487517	463931	439213	412838	384479	353839	320670	284356	245420	203620	158743	110639	99853.7	88268.5	75855.1	62584	48413.4	33270.7	17150.5	0	0	0	0	0	0	0	0	0	0	0	0	0
Bhutan	0	0	0	0	0	0	0	0	0	0	0	0	0	0	0	0	0	0	0	0	0	0	0	0	0	0	0	0	0	0	0	0	0	0	0	0	0	0	0	0	0
Bolivia	0	0	0	0	0	0	0	0	0	0	0	0	0	0	0	0	0	0	0	0	0	0	0	0	0	0	0	0	0	0	0	0	0	0	0	0	0	0	0	0	0
Bosnia and Herzegovina	0	0	0	0	0	0	0	0	0	0	0	0	0	0	0	0	0	0	0	0	0	0	0	0	0	0	0	0	0	0	0	0	0	0	0	0	0	0	0	0	0
Botswana	0	0	0	0	0	0	0	0	0	0	0	0	0	0	0	0	0	0	0	0	0	0	0	0	0	0	0	0	0	0	0	0	0	0	0	0	0	0	0	0	0
Brazil	0	0	0	0	0	0	0	0	0	0	0	0	0	0	0	0	0	0	0	0	0	0	0	0	0	0	0	0	0	0	0	0	0	0	0	0	0	0	0	0	0
Brunei	0	0	0	0	0	0	0	0	0	0	0	0	0	0	0	0	0	0	0	0	0	0	0	0	0	0	0	0	0	0	0	0	0	0	0	0	0	0	0	0	0
Bulgaria	0	0	0	0	0	0	0	0	0	0	0	0	0	0	0	0	0	0	0	0	0	0	0	0	0	0	0	0	0	0	0	0	0	0	0	0	0	0	0	0	0
Burkina Faso	618171	633013	584060	532820	478972	422163	360861	296529	228664	156832	80705	0	0	0	0	0	0	0	0	0	0	0	0	0	0	0	0	0	0	0	0	0	0	0	0	0	0	0	0	0	0
Burundi	149818	151969	154347	156860	159359	161787	163103	164328	165804	167969	171118	177272	184543	192729	201484	210509	203300	195030	185529	174702	162534	146820	129849	111595	92043.7	71172.7	48867.4	25175.2	0	0	0	0	0	0	0	0	0	0	0	0	0
Cambodia	0	0	0	0	0	0	0	0	0	0	0	0	0	0	0	0	0	0	0	0	0	0	0	0	0	0	0	0	0	0	0	0	0	0	0	0	0	0	0	0	0
Cameroon	3.19475e+06	3.28155e+06	3.37313e+06	3.46951e+06	3.57114e+06	3.67831e+06	3.78192e+06	3.89159e+06	4.00709e+06	4.12775e+06	4.08228e+06	4.02181e+06	3.95554e+06	3.88322e+06	3.80479e+06	3.7198e+06	3.61963e+06	3.5141e+06	3.40136e+06	3.27959e+06	3.14779e+06	2.96642e+06	2.77337e+06	2.56768e+06	2.34862e+06	2.11534e+06	1.86463e+06	1.5986e+06	1.31614e+06	1.01614e+06	697500	358716	0	0	0	0	0	0	0	0	0
Canada	0	0	0	0	0	0	0	0	0	0	0	0	0	0	0	0	0	0	0	0	0	0	0	0	0	0	0	0	0	0	0	0	0	0	0	0	0	0	0	0	0
Cape Verde	0	0	0	0	0	0	0	0	0	0	0	0	0	0	0	0	0	0	0	0	0	0	0	0	0	0	0	0	0	0	0	0	0	0	0	0	0	0	0	0	0
Central African Republic	241767	247101	253172	259800	266716	273728	280000	286260	292542	298933	292510	284196	275708	267011	258064	248879	239532	229982	220119	209837	199039	186847	173979	160413	146136	131100	114972	98120.2	80424.4	61790.4	42182.9	21580.9	0	0	0	0	0	0	0	0	0
Chad	509895	522806	536586	551321	567155	584177	600213	617833	637089	629246	621141	611040	600732	589471	576596	561768	542975	522284	499799	475617	449687	405775	359089	309212	255757	198401	136579	70570.8	0	0	0	0	0	0	0	0	0	0	0	0	0
Chile	0	0	0	0	0	0	0	0	0	0	0	0	0	0	0	0	0	0	0	0	0	0	0	0	0	0	0	0	0	0	0	0	0	0	0	0	0	0	0	0	0
China	0	0	0	0	0	0	0	0	0	0	0	0	0	0	0	0	0	0	0	0	0	0	0	0	0	0	0	0	0	0	0	0	0	0	0	0	0	0	0	0	0
Colombia	0	0	0	0	0	0	0	0	0	0	0	0	0	0	0	0	0	0	0	0	0	0	0	0	0	0	0	0	0	0	0	0	0	0	0	0	0	0	0	0	0
Comoros	0	0	0	0	0	0	0	0	0	0	0	0	0	0	0	0	0	0	0	0	0	0	0	0	0	0	0	0	0	0	0	0	0	0	0	0	0	0	0	0	0
Congo	167306	172193	177306	182656	188240	194048	199943	206058	212304	218589	224850	230154	222279	213964	205316	196380	187437	178037	167980	157086	145249	130318	114479	97751.8	80145.8	61637.1	42112.4	21601.2	0	0	0	0	0	0	0	0	0	0	0	0	0
Costa Rica	0	0	0	0	0	0	0	0	0	0	0	0	0	0	0	0	0	0	0	0	0	0	0	0	0	0	0	0	0	0	0	0	0	0	0	0	0	0	0	0	0
Côte d’Ivoire	1.3917e+06	1.44678e+06	1.50485e+06	1.56531e+06	1.62719e+06	1.6896e+06	1.62911e+06	1.56077e+06	1.48417e+06	1.39903e+06	1.30539e+06	1.19711e+06	1.08276e+06	963226	839193	711046	580304	444212	302520	154695	0	0	0	0	0	0	0	0	0	0	0	0	0	0	0	0	0	0	0	0	0
Croatia	0	0	0	0	0	0	0	0	0	0	0	0	0	0	0	0	0	0	0	0	0	0	0	0	0	0	0	0	0	0	0	0	0	0	0	0	0	0	0	0	0
Cuba	0	0	0	0	0	0	0	0	0	0	0	0	0	0	0	0	0	0	0	0	0	0	0	0	0	0	0	0	0	0	0	0	0	0	0	0	0	0	0	0	0
Cyprus	0	0	0	0	0	0	0	0	0	0	0	0	0	0	0	0	0	0	0	0	0	0	0	0	0	0	0	0	0	0	0	0	0	0	0	0	0	0	0	0	0
Czech Republic	0	0	0	0	0	0	0	0	0	0	0	0	0	0	0	0	0	0	0	0	0	0	0	0	0	0	0	0	0	0	0	0	0	0	0	0	0	0	0	0	0
Democratic Republic of the Congo	1.72236e+06	1.7794e+06	1.84275e+06	1.90862e+06	1.97306e+06	2.03412e+06	2.07793e+06	2.11844e+06	2.15912e+06	2.20384e+06	2.25507e+06	2.30944e+06	2.30173e+06	2.29674e+06	2.29253e+06	2.28771e+06	2.27429e+06	2.26158e+06	2.2484e+06	2.2335e+06	2.21614e+06	2.16751e+06	2.11581e+06	2.06022e+06	2.00008e+06	1.93482e+06	1.85941e+06	1.779e+06	1.69286e+06	1.60033e+06	1.50081e+06	1.39042e+06	1.27313e+06	1.14802e+06	1.01429e+06	871302	717203	553663	380013	195650	0
Denmark	0	0	0	0	0	0	0	0	0	0	0	0	0	0	0	0	0	0	0	0	0	0	0	0	0	0	0	0	0	0	0	0	0	0	0	0	0	0	0	0	0
Djibouti	0	0	0	0	0	0	0	0	0	0	0	0	0	0	0	0	0	0	0	0	0	0	0	0	0	0	0	0	0	0	0	0	0	0	0	0	0	0	0	0	0
Dominican Republic	0	0	0	0	0	0	0	0	0	0	0	0	0	0	0	0	0	0	0	0	0	0	0	0	0	0	0	0	0	0	0	0	0	0	0	0	0	0	0	0	0
Ecuador	0	0	0	0	0	0	0	0	0	0	0	0	0	0	0	0	0	0	0	0	0	0	0	0	0	0	0	0	0	0	0	0	0	0	0	0	0	0	0	0	0
Egypt	0	0	0	0	0	0	0	0	0	0	0	0	0	0	0	0	0	0	0	0	0	0	0	0	0	0	0	0	0	0	0	0	0	0	0	0	0	0	0	0	0
El Salvador	0	0	0	0	0	0	0	0	0	0	0	0	0	0	0	0	0	0	0	0	0	0	0	0	0	0	0	0	0	0	0	0	0	0	0	0	0	0	0	0	0
Equatorial Guinea	704502	717021	731087	746431	762979	780884	800569	821558	844601	870642	872037	871852	873273	875297	876546	876164	871280	864895	856942	847609	836888	790798	741802	689154	632186	570597	503515	431921	355677	274654	188593	96981.2	0	0	0	0	0	0	0	0	0
Eritrea	0	0	0	0	0	0	0	0	0	0	0	0	0	0	0	0	0	0	0	0	0	0	0	0	0	0	0	0	0	0	0	0	0	0	0	0	0	0	0	0	0
Estonia	0	0	0	0	0	0	0	0	0	0	0	0	0	0	0	0	0	0	0	0	0	0	0	0	0	0	0	0	0	0	0	0	0	0	0	0	0	0	0	0	0
Ethiopia	765862	790234	817012	845610	875170	905108	931039	957408	984491	1.01292e+06	1.04317e+06	1.07266e+06	1.05011e+06	1.02619e+06	1.00013e+06	971643	941192	908103	872362	833936	792545	752600	709039	661465	609444	552599	490097	422577	349679	271117	186723	96329.7	0	0	0	0	0	0	0	0	0
Federated States of Micronesia	0	0	0	0	0	0	0	0	0	0	0	0	0	0	0	0	0	0	0	0	0	0	0	0	0	0	0	0	0	0	0	0	0	0	0	0	0	0	0	0	0
Fiji	0	0	0	0	0	0	0	0	0	0	0	0	0	0	0	0	0	0	0	0	0	0	0	0	0	0	0	0	0	0	0	0	0	0	0	0	0	0	0	0	0
Finland	0	0	0	0	0	0	0	0	0	0	0	0	0	0	0	0	0	0	0	0	0	0	0	0	0	0	0	0	0	0	0	0	0	0	0	0	0	0	0	0	0
France	0	0	0	0	0	0	0	0	0	0	0	0	0	0	0	0	0	0	0	0	0	0	0	0	0	0	0	0	0	0	0	0	0	0	0	0	0	0	0	0	0
Gabon	0	0	0	0	0	0	0	0	0	0	0	0	0	0	0	0	0	0	0	0	0	0	0	0	0	0	0	0	0	0	0	0	0	0	0	0	0	0	0	0	0
Georgia	0	0	0	0	0	0	0	0	0	0	0	0	0	0	0	0	0	0	0	0	0	0	0	0	0	0	0	0	0	0	0	0	0	0	0	0	0	0	0	0	0
Germany	0	0	0	0	0	0	0	0	0	0	0	0	0	0	0	0	0	0	0	0	0	0	0	0	0	0	0	0	0	0	0	0	0	0	0	0	0	0	0	0	0
Ghana	805784	832943	817328	799682	779236	755606	726851	695374	661544	625674	587814	549022	507354	462486	414108	361839	304834	243617	177670	106660	30586.7	28748.1	26761.7	24642.3	22407.2	20063.8	17604	15021.2	12308.4	9457.26	6459.97	3308.28	0	0	0	0	0	0	0	0	0
Greece	0	0	0	0	0	0	0	0	0	0	0	0	0	0	0	0	0	0	0	0	0	0	0	0	0	0	0	0	0	0	0	0	0	0	0	0	0	0	0	0	0
Grenada	0	0	0	0	0	0	0	0	0	0	0	0	0	0	0	0	0	0	0	0	0	0	0	0	0	0	0	0	0	0	0	0	0	0	0	0	0	0	0	0	0
Guatemala	0	0	0	0	0	0	0	0	0	0	0	0	0	0	0	0	0	0	0	0	0	0	0	0	0	0	0	0	0	0	0	0	0	0	0	0	0	0	0	0	0
Guinea	292834	307629	325112	343719	361636	377829	365827	350417	332723	313844	294382	273581	252216	230351	207994	185038	161439	136983	111280	84027.3	55056.9	49547.3	43693.7	37468.9	30850.2	23815.8	16329.5	8399.09	0	0	0	0	0	0	0	0	0	0	0	0	0
Guinea-Bissau	38119.9	39181.8	36119.7	32815.3	29370.7	25803.3	21974.1	18005.5	13851.9	9473.46	4857.04	0	0	0	0	0	0	0	0	0	0	0	0	0	0	0	0	0	0	0	0	0	0	0	0	0	0	0	0	0	0
Guyana	0	0	0	0	0	0	0	0	0	0	0	0	0	0	0	0	0	0	0	0	0	0	0	0	0	0	0	0	0	0	0	0	0	0	0	0	0	0	0	0	0
Haiti	0	0	0	0	0	0	0	0	0	0	0	0	0	0	0	0	0	0	0	0	0	0	0	0	0	0	0	0	0	0	0	0	0	0	0	0	0	0	0	0	0
Honduras	0	0	0	0	0	0	0	0	0	0	0	0	0	0	0	0	0	0	0	0	0	0	0	0	0	0	0	0	0	0	0	0	0	0	0	0	0	0	0	0	0
Hungary	0	0	0	0	0	0	0	0	0	0	0	0	0	0	0	0	0	0	0	0	0	0	0	0	0	0	0	0	0	0	0	0	0	0	0	0	0	0	0	0	0
Iceland	0	0	0	0	0	0	0	0	0	0	0	0	0	0	0	0	0	0	0	0	0	0	0	0	0	0	0	0	0	0	0	0	0	0	0	0	0	0	0	0	0
India	0	0	0	0	0	0	0	0	0	0	0	0	0	0	0	0	0	0	0	0	0	0	0	0	0	0	0	0	0	0	0	0	0	0	0	0	0	0	0	0	0
Indonesia	0	0	0	0	0	0	0	0	0	0	0	0	0	0	0	0	0	0	0	0	0	0	0	0	0	0	0	0	0	0	0	0	0	0	0	0	0	0	0	0	0
Iran	0	0	0	0	0	0	0	0	0	0	0	0	0	0	0	0	0	0	0	0	0	0	0	0	0	0	0	0	0	0	0	0	0	0	0	0	0	0	0	0	0
Iraq	0	0	0	0	0	0	0	0	0	0	0	0	0	0	0	0	0	0	0	0	0	0	0	0	0	0	0	0	0	0	0	0	0	0	0	0	0	0	0	0	0
Ireland	0	0	0	0	0	0	0	0	0	0	0	0	0	0	0	0	0	0	0	0	0	0	0	0	0	0	0	0	0	0	0	0	0	0	0	0	0	0	0	0	0
Israel	0	0	0	0	0	0	0	0	0	0	0	0	0	0	0	0	0	0	0	0	0	0	0	0	0	0	0	0	0	0	0	0	0	0	0	0	0	0	0	0	0
Italy	0	0	0	0	0	0	0	0	0	0	0	0	0	0	0	0	0	0	0	0	0	0	0	0	0	0	0	0	0	0	0	0	0	0	0	0	0	0	0	0	0
Jamaica	0	0	0	0	0	0	0	0	0	0	0	0	0	0	0	0	0	0	0	0	0	0	0	0	0	0	0	0	0	0	0	0	0	0	0	0	0	0	0	0	0
Japan	0	0	0	0	0	0	0	0	0	0	0	0	0	0	0	0	0	0	0	0	0	0	0	0	0	0	0	0	0	0	0	0	0	0	0	0	0	0	0	0	0
Jordan	0	0	0	0	0	0	0	0	0	0	0	0	0	0	0	0	0	0	0	0	0	0	0	0	0	0	0	0	0	0	0	0	0	0	0	0	0	0	0	0	0
Kazakhstan	0	0	0	0	0	0	0	0	0	0	0	0	0	0	0	0	0	0	0	0	0	0	0	0	0	0	0	0	0	0	0	0	0	0	0	0	0	0	0	0	0
Kenya	0	0	0	0	0	0	0	0	0	0	0	0	0	0	0	0	0	0	0	0	0	0	0	0	0	0	0	0	0	0	0	0	0	0	0	0	0	0	0	0	0
Kiribati	0	0	0	0	0	0	0	0	0	0	0	0	0	0	0	0	0	0	0	0	0	0	0	0	0	0	0	0	0	0	0	0	0	0	0	0	0	0	0	0	0
Kuwait	0	0	0	0	0	0	0	0	0	0	0	0	0	0	0	0	0	0	0	0	0	0	0	0	0	0	0	0	0	0	0	0	0	0	0	0	0	0	0	0	0
Kyrgyzstan	0	0	0	0	0	0	0	0	0	0	0	0	0	0	0	0	0	0	0	0	0	0	0	0	0	0	0	0	0	0	0	0	0	0	0	0	0	0	0	0	0
Laos	0	0	0	0	0	0	0	0	0	0	0	0	0	0	0	0	0	0	0	0	0	0	0	0	0	0	0	0	0	0	0	0	0	0	0	0	0	0	0	0	0
Latvia	0	0	0	0	0	0	0	0	0	0	0	0	0	0	0	0	0	0	0	0	0	0	0	0	0	0	0	0	0	0	0	0	0	0	0	0	0	0	0	0	0
Lebanon	0	0	0	0	0	0	0	0	0	0	0	0	0	0	0	0	0	0	0	0	0	0	0	0	0	0	0	0	0	0	0	0	0	0	0	0	0	0	0	0	0
Lesotho	0	0	0	0	0	0	0	0	0	0	0	0	0	0	0	0	0	0	0	0	0	0	0	0	0	0	0	0	0	0	0	0	0	0	0	0	0	0	0	0	0
Liberia	179432	176854	174594	173756	175647	180859	191514	206415	223368	239717	253845	262666	268708	273448	278791	285937	295653	285037	273691	260542	245127	224914	202569	178466	152878	125839	97155.5	66716.4	34374.3	0	0	0	0	0	0	0	0	0	0	0	0
Libya	0	0	0	0	0	0	0	0	0	0	0	0	0	0	0	0	0	0	0	0	0	0	0	0	0	0	0	0	0	0	0	0	0	0	0	0	0	0	0	0	0
Lithuania	0	0	0	0	0	0	0	0	0	0	0	0	0	0	0	0	0	0	0	0	0	0	0	0	0	0	0	0	0	0	0	0	0	0	0	0	0	0	0	0	0
Luxembourg	0	0	0	0	0	0	0	0	0	0	0	0	0	0	0	0	0	0	0	0	0	0	0	0	0	0	0	0	0	0	0	0	0	0	0	0	0	0	0	0	0
Macedonia	0	0	0	0	0	0	0	0	0	0	0	0	0	0	0	0	0	0	0	0	0	0	0	0	0	0	0	0	0	0	0	0	0	0	0	0	0	0	0	0	0
Madagascar	0	0	0	0	0	0	0	0	0	0	0	0	0	0	0	0	0	0	0	0	0	0	0	0	0	0	0	0	0	0	0	0	0	0	0	0	0	0	0	0	0
Malawi	94642.9	96692.8	97844	98538.2	99346.5	100634	101899	103863	101859	99817.5	97566.6	95024.8	92330.5	89532.8	86675.5	83752.7	80745	77544.5	74137.4	70522.4	66678.2	60046.4	53103.9	45715.9	37766.5	29219.6	20111.1	10361.4	0	0	0	0	0	0	0	0	0	0	0	0	0
Malaysia	0	0	0	0	0	0	0	0	0	0	0	0	0	0	0	0	0	0	0	0	0	0	0	0	0	0	0	0	0	0	0	0	0	0	0	0	0	0	0	0	0
Maldives	0	0	0	0	0	0	0	0	0	0	0	0	0	0	0	0	0	0	0	0	0	0	0	0	0	0	0	0	0	0	0	0	0	0	0	0	0	0	0	0	0
Mali	160814	163686	150470	136946	122842	107988	91991	75300.1	57839.8	39533.9	20289.1	0	0	0	0	0	0	0	0	0	0	0	0	0	0	0	0	0	0	0	0	0	0	0	0	0	0	0	0	0	0
Malta	0	0	0	0	0	0	0	0	0	0	0	0	0	0	0	0	0	0	0	0	0	0	0	0	0	0	0	0	0	0	0	0	0	0	0	0	0	0	0	0	0
Mauritania	0	0	0	0	0	0	0	0	0	0	0	0	0	0	0	0	0	0	0	0	0	0	0	0	0	0	0	0	0	0	0	0	0	0	0	0	0	0	0	0	0
Mauritius	0	0	0	0	0	0	0	0	0	0	0	0	0	0	0	0	0	0	0	0	0	0	0	0	0	0	0	0	0	0	0	0	0	0	0	0	0	0	0	0	0
Mexico	0	0	0	0	0	0	0	0	0	0	0	0	0	0	0	0	0	0	0	0	0	0	0	0	0	0	0	0	0	0	0	0	0	0	0	0	0	0	0	0	0
Moldova	0	0	0	0	0	0	0	0	0	0	0	0	0	0	0	0	0	0	0	0	0	0	0	0	0	0	0	0	0	0	0	0	0	0	0	0	0	0	0	0	0
Mongolia	0	0	0	0	0	0	0	0	0	0	0	0	0	0	0	0	0	0	0	0	0	0	0	0	0	0	0	0	0	0	0	0	0	0	0	0	0	0	0	0	0
Montenegro	0	0	0	0	0	0	0	0	0	0	0	0	0	0	0	0	0	0	0	0	0	0	0	0	0	0	0	0	0	0	0	0	0	0	0	0	0	0	0	0	0
Morocco	0	0	0	0	0	0	0	0	0	0	0	0	0	0	0	0	0	0	0	0	0	0	0	0	0	0	0	0	0	0	0	0	0	0	0	0	0	0	0	0	0
Mozambique	0	0	0	0	0	0	0	0	0	0	0	0	0	0	0	0	0	0	0	0	0	0	0	0	0	0	0	0	0	0	0	0	0	0	0	0	0	0	0	0	0
Myanmar	0	0	0	0	0	0	0	0	0	0	0	0	0	0	0	0	0	0	0	0	0	0	0	0	0	0	0	0	0	0	0	0	0	0	0	0	0	0	0	0	0
Namibia	0	0	0	0	0	0	0	0	0	0	0	0	0	0	0	0	0	0	0	0	0	0	0	0	0	0	0	0	0	0	0	0	0	0	0	0	0	0	0	0	0
Nepal	0	0	0	0	0	0	0	0	0	0	0	0	0	0	0	0	0	0	0	0	0	0	0	0	0	0	0	0	0	0	0	0	0	0	0	0	0	0	0	0	0
Netherlands	0	0	0	0	0	0	0	0	0	0	0	0	0	0	0	0	0	0	0	0	0	0	0	0	0	0	0	0	0	0	0	0	0	0	0	0	0	0	0	0	0
New Zealand	0	0	0	0	0	0	0	0	0	0	0	0	0	0	0	0	0	0	0	0	0	0	0	0	0	0	0	0	0	0	0	0	0	0	0	0	0	0	0	0	0
Nicaragua	0	0	0	0	0	0	0	0	0	0	0	0	0	0	0	0	0	0	0	0	0	0	0	0	0	0	0	0	0	0	0	0	0	0	0	0	0	0	0	0	0
Niger	14048.2	14458.9	13417.3	12314.2	11138.7	9879.75	8472.14	6988.13	5410.85	3726.92	1926.32	0	0	0	0	0	0	0	0	0	0	0	0	0	0	0	0	0	0	0	0	0	0	0	0	0	0	0	0	0	0
Nigeria	6.55834e+06	6.73042e+06	6.91197e+06	7.10248e+06	7.30129e+06	7.50762e+06	7.70381e+06	7.90939e+06	8.12285e+06	7.98401e+06	7.83033e+06	7.64549e+06	7.44947e+06	7.24021e+06	7.01609e+06	6.77585e+06	6.51528e+06	6.24099e+06	5.95067e+06	5.64221e+06	5.31399e+06	4.84597e+06	4.35094e+06	3.82763e+06	3.27491e+06	2.691e+06	2.07296e+06	1.42066e+06	730614	0	0	0	0	0	0	0	0	0	0	0	0
North Korea	0	0	0	0	0	0	0	0	0	0	0	0	0	0	0	0	0	0	0	0	0	0	0	0	0	0	0	0	0	0	0	0	0	0	0	0	0	0	0	0	0
Norway	0	0	0	0	0	0	0	0	0	0	0	0	0	0	0	0	0	0	0	0	0	0	0	0	0	0	0	0	0	0	0	0	0	0	0	0	0	0	0	0	0
Oman	0	0	0	0	0	0	0	0	0	0	0	0	0	0	0	0	0	0	0	0	0	0	0	0	0	0	0	0	0	0	0	0	0	0	0	0	0	0	0	0	0
Pakistan	0	0	0	0	0	0	0	0	0	0	0	0	0	0	0	0	0	0	0	0	0	0	0	0	0	0	0	0	0	0	0	0	0	0	0	0	0	0	0	0	0
Palestine	0	0	0	0	0	0	0	0	0	0	0	0	0	0	0	0	0	0	0	0	0	0	0	0	0	0	0	0	0	0	0	0	0	0	0	0	0	0	0	0	0
Panama	0	0	0	0	0	0	0	0	0	0	0	0	0	0	0	0	0	0	0	0	0	0	0	0	0	0	0	0	0	0	0	0	0	0	0	0	0	0	0	0	0
Papua New Guinea	0	0	0	0	0	0	0	0	0	0	0	0	0	0	0	0	0	0	0	0	0	0	0	0	0	0	0	0	0	0	0	0	0	0	0	0	0	0	0	0	0
Paraguay	0	0	0	0	0	0	0	0	0	0	0	0	0	0	0	0	0	0	0	0	0	0	0	0	0	0	0	0	0	0	0	0	0	0	0	0	0	0	0	0	0
Peru	0	0	0	0	0	0	0	0	0	0	0	0	0	0	0	0	0	0	0	0	0	0	0	0	0	0	0	0	0	0	0	0	0	0	0	0	0	0	0	0	0
Philippines	0	0	0	0	0	0	0	0	0	0	0	0	0	0	0	0	0	0	0	0	0	0	0	0	0	0	0	0	0	0	0	0	0	0	0	0	0	0	0	0	0
Poland	0	0	0	0	0	0	0	0	0	0	0	0	0	0	0	0	0	0	0	0	0	0	0	0	0	0	0	0	0	0	0	0	0	0	0	0	0	0	0	0	0
Portugal	0	0	0	0	0	0	0	0	0	0	0	0	0	0	0	0	0	0	0	0	0	0	0	0	0	0	0	0	0	0	0	0	0	0	0	0	0	0	0	0	0
Qatar	0	0	0	0	0	0	0	0	0	0	0	0	0	0	0	0	0	0	0	0	0	0	0	0	0	0	0	0	0	0	0	0	0	0	0	0	0	0	0	0	0
Romania	0	0	0	0	0	0	0	0	0	0	0	0	0	0	0	0	0	0	0	0	0	0	0	0	0	0	0	0	0	0	0	0	0	0	0	0	0	0	0	0	0
Russia	0	0	0	0	0	0	0	0	0	0	0	0	0	0	0	0	0	0	0	0	0	0	0	0	0	0	0	0	0	0	0	0	0	0	0	0	0	0	0	0	0
Rwanda	0	0	0	0	0	0	0	0	0	0	0	0	0	0	0	0	0	0	0	0	0	0	0	0	0	0	0	0	0	0	0	0	0	0	0	0	0	0	0	0	0
Saint Lucia	0	0	0	0	0	0	0	0	0	0	0	0	0	0	0	0	0	0	0	0	0	0	0	0	0	0	0	0	0	0	0	0	0	0	0	0	0	0	0	0	0
Saint Vincent and the Grenadines	0	0	0	0	0	0	0	0	0	0	0	0	0	0	0	0	0	0	0	0	0	0	0	0	0	0	0	0	0	0	0	0	0	0	0	0	0	0	0	0	0
Samoa	0	0	0	0	0	0	0	0	0	0	0	0	0	0	0	0	0	0	0	0	0	0	0	0	0	0	0	0	0	0	0	0	0	0	0	0	0	0	0	0	0
São Tomé and Príncipe	0	0	0	0	0	0	0	0	0	0	0	0	0	0	0	0	0	0	0	0	0	0	0	0	0	0	0	0	0	0	0	0	0	0	0	0	0	0	0	0	0
Saudi Arabia	0	0	0	0	0	0	0	0	0	0	0	0	0	0	0	0	0	0	0	0	0	0	0	0	0	0	0	0	0	0	0	0	0	0	0	0	0	0	0	0	0
Senegal	6198.54	6404.9	5964.46	5489.23	4972.25	4410	3788.56	3124.32	2416.02	1661.58	857.579	0	0	0	0	0	0	0	0	0	0	0	0	0	0	0	0	0	0	0	0	0	0	0	0	0	0	0	0	0	0
Serbia	0	0	0	0	0	0	0	0	0	0	0	0	0	0	0	0	0	0	0	0	0	0	0	0	0	0	0	0	0	0	0	0	0	0	0	0	0	0	0	0	0
Seychelles	0	0	0	0	0	0	0	0	0	0	0	0	0	0	0	0	0	0	0	0	0	0	0	0	0	0	0	0	0	0	0	0	0	0	0	0	0	0	0	0	0
Sierra Leone	327143	328179	327190	325273	323707	323322	323614	325503	329517	336234	345805	358847	375786	394803	413734	431273	394520	353283	308650	261542	212295	189870	166412	141888	116230	89327.1	60888	31164.8	0	0	0	0	0	0	0	0	0	0	0	0	0
Singapore	0	0	0	0	0	0	0	0	0	0	0	0	0	0	0	0	0	0	0	0	0	0	0	0	0	0	0	0	0	0	0	0	0	0	0	0	0	0	0	0	0
Slovakia	0	0	0	0	0	0	0	0	0	0	0	0	0	0	0	0	0	0	0	0	0	0	0	0	0	0	0	0	0	0	0	0	0	0	0	0	0	0	0	0	0
Slovenia	0	0	0	0	0	0	0	0	0	0	0	0	0	0	0	0	0	0	0	0	0	0	0	0	0	0	0	0	0	0	0	0	0	0	0	0	0	0	0	0	0
Solomon Islands	0	0	0	0	0	0	0	0	0	0	0	0	0	0	0	0	0	0	0	0	0	0	0	0	0	0	0	0	0	0	0	0	0	0	0	0	0	0	0	0	0
Somalia	0	0	0	0	0	0	0	0	0	0	0	0	0	0	0	0	0	0	0	0	0	0	0	0	0	0	0	0	0	0	0	0	0	0	0	0	0	0	0	0	0
South Africa	0	0	0	0	0	0	0	0	0	0	0	0	0	0	0	0	0	0	0	0	0	0	0	0	0	0	0	0	0	0	0	0	0	0	0	0	0	0	0	0	0
South Korea	0	0	0	0	0	0	0	0	0	0	0	0	0	0	0	0	0	0	0	0	0	0	0	0	0	0	0	0	0	0	0	0	0	0	0	0	0	0	0	0	0
Spain	0	0	0	0	0	0	0	0	0	0	0	0	0	0	0	0	0	0	0	0	0	0	0	0	0	0	0	0	0	0	0	0	0	0	0	0	0	0	0	0	0
Sri Lanka	0	0	0	0	0	0	0	0	0	0	0	0	0	0	0	0	0	0	0	0	0	0	0	0	0	0	0	0	0	0	0	0	0	0	0	0	0	0	0	0	0
Sudan	2.75542e+06	2.84116e+06	2.93455e+06	3.03377e+06	3.1366e+06	3.24156e+06	3.33846e+06	3.43907e+06	3.54354e+06	3.65216e+06	3.76546e+06	3.87859e+06	3.99729e+06	4.12202e+06	4.25392e+06	4.39349e+06	4.53217e+06	4.68091e+06	4.83761e+06	4.38758e+06	3.90049e+06	3.52071e+06	3.11185e+06	2.67367e+06	2.20573e+06	1.70649e+06	1.17218e+06	604070	0	0	0	0	0	0	0	0	0	0	0	0	0
Suriname	0	0	0	0	0	0	0	0	0	0	0	0	0	0	0	0	0	0	0	0	0	0	0	0	0	0	0	0	0	0	0	0	0	0	0	0	0	0	0	0	0
Swaziland	0	0	0	0	0	0	0	0	0	0	0	0	0	0	0	0	0	0	0	0	0	0	0	0	0	0	0	0	0	0	0	0	0	0	0	0	0	0	0	0	0
Sweden	0	0	0	0	0	0	0	0	0	0	0	0	0	0	0	0	0	0	0	0	0	0	0	0	0	0	0	0	0	0	0	0	0	0	0	0	0	0	0	0	0
Switzerland	0	0	0	0	0	0	0	0	0	0	0	0	0	0	0	0	0	0	0	0	0	0	0	0	0	0	0	0	0	0	0	0	0	0	0	0	0	0	0	0	0
Syria	0	0	0	0	0	0	0	0	0	0	0	0	0	0	0	0	0	0	0	0	0	0	0	0	0	0	0	0	0	0	0	0	0	0	0	0	0	0	0	0	0
Tajikistan	0	0	0	0	0	0	0	0	0	0	0	0	0	0	0	0	0	0	0	0	0	0	0	0	0	0	0	0	0	0	0	0	0	0	0	0	0	0	0	0	0
Tanzania	660678	682643	706755	732199	757959	783467	805553	827270	849067	835797	821621	804892	787151	768349	748416	727221	704153	679847	654017	626455	596996	546465	492931	435847	374748	309340	239388	164648	84943.4	0	0	0	0	0	0	0	0	0	0	0	0
Thailand	0	0	0	0	0	0	0	0	0	0	0	0	0	0	0	0	0	0	0	0	0	0	0	0	0	0	0	0	0	0	0	0	0	0	0	0	0	0	0	0	0
The Bahamas	0	0	0	0	0	0	0	0	0	0	0	0	0	0	0	0	0	0	0	0	0	0	0	0	0	0	0	0	0	0	0	0	0	0	0	0	0	0	0	0	0
The Gambia	0	0	0	0	0	0	0	0	0	0	0	0	0	0	0	0	0	0	0	0	0	0	0	0	0	0	0	0	0	0	0	0	0	0	0	0	0	0	0	0	0
Timor-Leste	0	0	0	0	0	0	0	0	0	0	0	0	0	0	0	0	0	0	0	0	0	0	0	0	0	0	0	0	0	0	0	0	0	0	0	0	0	0	0	0	0
Togo	81629.2	84030.4	82268.4	80356.5	78266.6	75982.6	73446.4	70696.7	67723.1	64514	61050.3	57273.4	53217.7	48863.1	44190.2	39182.5	33794.5	28074.8	22001.6	15555.9	8724.51	7844.57	6907.48	5912.24	4858.2	3743.19	2562.84	1316.81	0	0	0	0	0	0	0	0	0	0	0	0	0
Tonga	0	0	0	0	0	0	0	0	0	0	0	0	0	0	0	0	0	0	0	0	0	0	0	0	0	0	0	0	0	0	0	0	0	0	0	0	0	0	0	0	0
Trinidad and Tobago	0	0	0	0	0	0	0	0	0	0	0	0	0	0	0	0	0	0	0	0	0	0	0	0	0	0	0	0	0	0	0	0	0	0	0	0	0	0	0	0	0
Tunisia	0	0	0	0	0	0	0	0	0	0	0	0	0	0	0	0	0	0	0	0	0	0	0	0	0	0	0	0	0	0	0	0	0	0	0	0	0	0	0	0	0
Turkey	0	0	0	0	0	0	0	0	0	0	0	0	0	0	0	0	0	0	0	0	0	0	0	0	0	0	0	0	0	0	0	0	0	0	0	0	0	0	0	0	0
Turkmenistan	0	0	0	0	0	0	0	0	0	0	0	0	0	0	0	0	0	0	0	0	0	0	0	0	0	0	0	0	0	0	0	0	0	0	0	0	0	0	0	0	0
Uganda	370341	381517	393090	405050	417436	430305	441754	453919	466866	480643	470914	460234	448887	436729	423666	409567	393817	376908	358602	338664	316922	291996	264953	235596	203741	169192	131603	91021.9	47227.5	0	0	0	0	0	0	0	0	0	0	0	0
Ukraine	0	0	0	0	0	0	0	0	0	0	0	0	0	0	0	0	0	0	0	0	0	0	0	0	0	0	0	0	0	0	0	0	0	0	0	0	0	0	0	0	0
United Arab Emirates	0	0	0	0	0	0	0	0	0	0	0	0	0	0	0	0	0	0	0	0	0	0	0	0	0	0	0	0	0	0	0	0	0	0	0	0	0	0	0	0	0
United Kingdom	0	0	0	0	0	0	0	0	0	0	0	0	0	0	0	0	0	0	0	0	0	0	0	0	0	0	0	0	0	0	0	0	0	0	0	0	0	0	0	0	0
United States	0	0	0	0	0	0	0	0	0	0	0	0	0	0	0	0	0	0	0	0	0	0	0	0	0	0	0	0	0	0	0	0	0	0	0	0	0	0	0	0	0
Uruguay	0	0	0	0	0	0	0	0	0	0	0	0	0	0	0	0	0	0	0	0	0	0	0	0	0	0	0	0	0	0	0	0	0	0	0	0	0	0	0	0	0
Uzbekistan	0	0	0	0	0	0	0	0	0	0	0	0	0	0	0	0	0	0	0	0	0	0	0	0	0	0	0	0	0	0	0	0	0	0	0	0	0	0	0	0	0
Vanuatu	0	0	0	0	0	0	0	0	0	0	0	0	0	0	0	0	0	0	0	0	0	0	0	0	0	0	0	0	0	0	0	0	0	0	0	0	0	0	0	0	0
Venezuela	0	0	0	0	0	0	0	0	0	0	0	0	0	0	0	0	0	0	0	0	0	0	0	0	0	0	0	0	0	0	0	0	0	0	0	0	0	0	0	0	0
Vietnam	0	0	0	0	0	0	0	0	0	0	0	0	0	0	0	0	0	0	0	0	0	0	0	0	0	0	0	0	0	0	0	0	0	0	0	0	0	0	0	0	0
Yemen	0	0	0	0	0	0	0	0	0	0	0	0	0	0	0	0	0	0	0	0	0	0	0	0	0	0	0	0	0	0	0	0	0	0	0	0	0	0	0	0	0
Zambia	0	0	0	0	0	0	0	0	0	0	0	0	0	0	0	0	0	0	0	0	0	0	0	0	0	0	0	0	0	0	0	0	0	0	0	0	0	0	0	0	0
Zimbabwe	0	0	0	0	0	0	0	0	0	0	0	0	0	0	0	0	0	0	0	0	0	0	0	0	0	0	0	0	0	0	0	0	0	0	0	0	0	0	0	0	0

## Sheet: Results
Onchocerciasis - Total Cost (women + men)
RC	2011-2020	2021-2030
	2.20649e+08	1.75109e+07
	discounting	0
	Productivity loss	0.0321
Prevalence oncho per quintile
Q1	Q2	Q3	Q4	Q5
1	0	0	0	0
Poverty cases averted (using average prodloss)	2020	2030
	#REF!	299615

## Sheet: WHO regions
Africa	Americas	South-East Asia	Eastern Mediterranean	Europe	Western Pacific
AFRO	AMRO	SEARO	EMRO	EURO	WPRO
1	2	3	4	5	6
Algeria	Antigua and Barbuda	Bangladesh	Afghanistan	Albania	Australia
Angola	Argentina	Bhutan	Bahrain	Andorra	Brunei Darussalam
Benin	Bahamas	Democratic People's Republic of Korea	Djibouti	Armenia	Cambodia
Botswana	Barbados	India	Egypt	Austria	China
Burkina Faso	Belize	Indonesia	Iran (Islamic Republic of)	Azerbaijan	Cook Islands
Burundi	Bolivia (Plurinational State of)	Maldives	Iraq	Belarus	Fiji
Cameroon	Brazil	Myanmar	Jordan	Belgium	Japan
Cape Verde	Canada	Nepal	Kuwait	Bosnia and Herzegovina	Kiribati
Central African Republic	Chile	Sri Lanka	Lebanon	Bulgaria	Lao People's Democratic Republic
Chad	Colombia	Thailand	Libya	Croatia	Malaysia
Comoros	Costa Rica	Timor-Leste	Morocco	Cyprus	Marshall Islands
Congo	Cuba		Oman	Czech Republic	Micronesia (Federated States of)
Côte d'Ivoire	Dominica		Pakistan	Denmark	Mongolia
Democratic Republic of the Congo	Dominican Republic		Qatar	Estonia	Nauru
Equatorial Guinea	Ecuador		Saudi Arabia	Finland	New Zealand
Eritrea	El Salvador		Somalia	France	Niue
Ethiopia	Grenada		Sudan	Georgia	Palau
Gabon	Guatemala		Syrian Arab Republic	Germany	Papua New Guinea
Gambia	Guyana		Tunisia	Greece	Philippines
Ghana	Haiti		United Arab Emirates	Hungary	Republic of Korea
Guinea	Honduras		Yemen	Iceland	Samoa
Guinea-Bissau	Jamaica			Ireland	Singapore
Kenya	Mexico			Israel	Solomon Islands
Lesotho	Nicaragua			Italy	Tonga
Liberia	Panama			Kazakhstan	Tuvalu
Madagascar	Paraguay			Kyrgyzstan	Vanuatu
Malawi	Peru			Latvia	Viet Nam
Mali	Saint Kitts and Nevis			Lithuania
Mauritania	Saint Lucia			Luxembourg
Mauritius	Saint Vincent and the Grenadines			Malta
Mozambique	Suriname			Monaco
Namibia	Trinidad and Tobago			Montenegro
Niger	United States of America			Netherlands
Nigeria	Uruguay			Norway
Rwanda	Venezuela (Bolivarian Republic of)			Poland
Sao Tome and Principe				Portugal
Senegal				Republic of Moldova
Seychelles				Romania
Sierra Leone				Russian Federation
South Africa				San Marino
South Sudan				Serbia
Swaziland				Slovakia
Togo				Slovenia
Uganda				Spain
United Republic of Tanzania				Sweden
Zambia				Switzerland
Zimbabwe				Tajikistan
				The former Yugoslav Republic of Macedonia
				Turkey
				Turkmenistan
				Ukraine
				United Kingdom
				Uzbekistan

## Sheet: Per region
	1990	1991	1992	1993	1994	1995	1996	1997	1998	1999	2000	2001	2002	2003	2004	2005	2006	2007	2008	2009	2010	2011	2012	2013	2014	2015	2016	2017	2018	2019	2020	2021	2022	2023	2024	2025	2026	2027	2028	2029	2030		WHO Region				1990	1991	1992
WORLD																																														Region
Men	2.71132e+07	2.78906e+07	2.85515e+07	2.92494e+07	2.99728e+07	3.07142e+07	3.11898e+07	3.16806e+07	3.21833e+07	3.21768e+07	3.18891e+07	3.14958e+07	3.10355e+07	3.05492e+07	3.00298e+07	2.94709e+07	2.86983e+07	2.78565e+07	2.69604e+07	2.52864e+07	2.34883e+07	2.17372e+07	1.98678e+07	1.78724e+07	1.57442e+07	1.34743e+07	1.10349e+07	8.44362e+06	5.68806e+06	3.78721e+06	3.06513e+06	2.29046e+06	1.46933e+06	1.32484e+06	1.17047e+06	1.00547e+06	827377	638554	438194	225570	0				Africa	1	4.37689e+07	4.50017e+07	4.5981e+07
Women	2.27713e+07	2.34173e+07	2.39436e+07	2.44972e+07	2.50674e+07	2.56471e+07	2.6015e+07	2.63895e+07	2.67689e+07	2.6738e+07	2.64618e+07	2.61082e+07	2.57167e+07	2.53023e+07	2.48587e+07	2.43805e+07	2.37354e+07	2.30327e+07	2.22831e+07	2.08645e+07	1.9341e+07	1.79026e+07	1.63685e+07	1.47328e+07	1.29898e+07	1.11327e+07	9.14195e+06	7.02828e+06	4.78197e+06	3.23349e+06	2.62226e+06	1.96734e+06	1.27313e+06	1.14802e+06	1.01429e+06	871302	717203	553663	380013	195650	0				Americas	2	0	0	0
Total	4.98846e+07	5.13079e+07	5.24951e+07	5.37466e+07	5.50402e+07	5.63613e+07	5.72048e+07	5.80701e+07	5.89522e+07	5.89148e+07	5.83508e+07	5.7604e+07	5.67522e+07	5.58515e+07	5.48885e+07	5.38514e+07	5.24337e+07	5.08892e+07	4.92435e+07	4.61509e+07	4.28293e+07	3.96398e+07	3.62363e+07	3.26052e+07	2.8734e+07	2.4607e+07	2.01768e+07	1.54719e+07	1.047e+07	7.0207e+06	5.6874e+06	4.2578e+06	2.74246e+06	2.47286e+06	2.18475e+06	1.87677e+06	1.54458e+06	1.19222e+06	818207	421221	0				South-East Asia	3	0	0	0
																																													Eastern Mediterranean	4	6.11567e+06	6.3062e+06	6.51411e+06
																																													Europe	5	0	0	0
MEN																																													Western Pacific	6	0	0	0
Afghanistan	0	0	0	0	0	0	0	0	0	0	0	0	0	0	0	0	0	0	0	0	0	0	0	0	0	0	0	0	0	0	0	0	0	0	0	0	0	0	0	0	0		4			totaal	4.98846e+07	5.13079e+07	5.24951e+07
Albania	0	0	0	0	0	0	0	0	0	0	0	0	0	0	0	0	0	0	0	0	0	0	0	0	0	0	0	0	0	0	0	0	0	0	0	0	0	0	0	0	0		5			check	1	1	1
Algeria	0	0	0	0	0	0	0	0	0	0	0	0	0	0	0	0	0	0	0	0	0	0	0	0	0	0	0	0	0	0	0	0	0	0	0	0	0	0	0	0	0		1
Angola	450304	462437	476753	492578	509071	525759	539635	553980	569296	586192	604968	623682	644811	667826	692124	717345	707639	697032	685338	672490	658399	604406	547008	485504	419214	347627	269983	186403	96553.4	0	0	0	0	0	0	0	0	0	0	0	0		1
Antigua and Barbuda	0	0	0	0	0	0	0	0	0	0	0	0	0	0	0	0	0	0	0	0	0	0	0	0	0	0	0	0	0	0	0	0	0	0	0	0	0	0	0	0	0		2
Argentina	0	0	0	0	0	0	0	0	0	0	0	0	0	0	0	0	0	0	0	0	0	0	0	0	0	0	0	0	0	0	0	0	0	0	0	0	0	0	0	0	0		2
Armenia	0	0	0	0	0	0	0	0	0	0	0	0	0	0	0	0	0	0	0	0	0	0	0	0	0	0	0	0	0	0	0	0	0	0	0	0	0	0	0	0	0		5
Australia	0	0	0	0	0	0	0	0	0	0	0	0	0	0	0	0	0	0	0	0	0	0	0	0	0	0	0	0	0	0	0	0	0	0	0	0	0	0	0	0	0		6
Austria	0	0	0	0	0	0	0	0	0	0	0	0	0	0	0	0	0	0	0	0	0	0	0	0	0	0	0	0	0	0	0	0	0	0	0	0	0	0	0	0	0		5
Azerbaijan	0	0	0	0	0	0	0	0	0	0	0	0	0	0	0	0	0	0	0	0	0	0	0	0	0	0	0	0	0	0	0	0	0	0	0	0	0	0	0	0	0		5
Bahrain	0	0	0	0	0	0	0	0	0	0	0	0	0	0	0	0	0	0	0	0	0	0	0	0	0	0	0	0	0	0	0	0	0	0	0	0	0	0	0	0	0		4
Bangladesh	0	0	0	0	0	0	0	0	0	0	0	0	0	0	0	0	0	0	0	0	0	0	0	0	0	0	0	0	0	0	0	0	0	0	0	0	0	0	0	0	0		3
Barbados	0	0	0	0	0	0	0	0	0	0	0	0	0	0	0	0	0	0	0	0	0	0	0	0	0	0	0	0	0	0	0	0	0	0	0	0	0	0	0	0	0		2
Belarus	0	0	0	0	0	0	0	0	0	0	0	0	0	0	0	0	0	0	0	0	0	0	0	0	0	0	0	0	0	0	0	0	0	0	0	0	0	0	0	0	0		5
Belgium	0	0	0	0	0	0	0	0	0	0	0	0	0	0	0	0	0	0	0	0	0	0	0	0	0	0	0	0	0	0	0	0	0	0	0	0	0	0	0	0	0		5
Belize	0	0	0	0	0	0	0	0	0	0	0	0	0	0	0	0	0	0	0	0	0	0	0	0	0	0	0	0	0	0	0	0	0	0	0	0	0	0	0	0	0		2
Benin	631278	657086	653225	648363	641004	630318	611386	589916	566564	542049	516635	490936	463568	433814	400998	364661	323600	279107	230898	178744	122476	110676	97953	84278.3	69620.2	53928.1	37098.4	19144.9	0	0	0	0	0	0	0	0	0	0	0	0	0		1
Bhutan	0	0	0	0	0	0	0	0	0	0	0	0	0	0	0	0	0	0	0	0	0	0	0	0	0	0	0	0	0	0	0	0	0	0	0	0	0	0	0	0	0		3
Bolivia	0	0	0	0	0	0	0	0	0	0	0	0	0	0	0	0	0	0	0	0	0	0	0	0	0	0	0	0	0	0	0	0	0	0	0	0	0	0	0	0	0		2
Bosnia and Herzegovina	0	0	0	0	0	0	0	0	0	0	0	0	0	0	0	0	0	0	0	0	0	0	0	0	0	0	0	0	0	0	0	0	0	0	0	0	0	0	0	0	0		5
Botswana	0	0	0	0	0	0	0	0	0	0	0	0	0	0	0	0	0	0	0	0	0	0	0	0	0	0	0	0	0	0	0	0	0	0	0	0	0	0	0	0	0		1
Brazil	0	0	0	0	0	0	0	0	0	0	0	0	0	0	0	0	0	0	0	0	0	0	0	0	0	0	0	0	0	0	0	0	0	0	0	0	0	0	0	0	0		2
Brunei	0	0	0	0	0	0	0	0	0	0	0	0	0	0	0	0	0	0	0	0	0	0	0	0	0	0	0	0	0	0	0	0	0	0	0	0	0	0	0	0	0		6
Bulgaria	0	0	0	0	0	0	0	0	0	0	0	0	0	0	0	0	0	0	0	0	0	0	0	0	0	0	0	0	0	0	0	0	0	0	0	0	0	0	0	0	0		5
Burkina Faso	556863	570735	527210	481629	433624	382821	327843	269918	208570	143367	73952.4	0	0	0	0	0	0	0	0	0	0	0	0	0	0	0	0	0	0	0	0	0	0	0	0	0	0	0	0	0	0		1
Burundi	166304	168240	170198	172243	174430	176851	179421	182174	185400	189445	194522	202720	212070	222319	233075	244015	235828	226229	215125	202472	188257	169601	149666	128380	105697	81588.7	55905.8	28748.4	0	0	0	0	0	0	0	0	0	0	0	0	0		1
Cambodia	0	0	0	0	0	0	0	0	0	0	0	0	0	0	0	0	0	0	0	0	0	0	0	0	0	0	0	0	0	0	0	0	0	0	0	0	0	0	0	0	0		6
Cameroon	3.58882e+06	3.68885e+06	3.7945e+06	3.90596e+06	4.02393e+06	4.14878e+06	4.26944e+06	4.39776e+06	4.53343e+06	4.67556e+06	4.63119e+06	4.56995e+06	4.50225e+06	4.42776e+06	4.34639e+06	4.25753e+06	4.15056e+06	4.03747e+06	3.91603e+06	3.78402e+06	3.6402e+06	3.43367e+06	3.21305e+06	2.97731e+06	2.72569e+06	2.45713e+06	2.16733e+06	1.8594e+06	1.53192e+06	1.18349e+06	812832	418220	0	0	0	0	0	0	0	0	0		1
Canada	0	0	0	0	0	0	0	0	0	0	0	0	0	0	0	0	0	0	0	0	0	0	0	0	0	0	0	0	0	0	0	0	0	0	0	0	0	0	0	0	0		2
Cape Verde	0	0	0	0	0	0	0	0	0	0	0	0	0	0	0	0	0	0	0	0	0	0	0	0	0	0	0	0	0	0	0	0	0	0	0	0	0	0	0	0	0		1
Central African Republic	267656	273333	279917	287198	294860	302679	309637	316652	323760	331057	324375	315484	306463	297254	287787	278059	268106	257948	247449	236478	224915	211317	196941	181756	165743	148841	130600	111530	91481.3	70336.6	48051.3	24590.5	0	0	0	0	0	0	0	0	0		1
Chad	604525	620599	637731	656062	675798	697067	717164	739254	763442	755147	746574	735502	724203	711735	697252	680318	658332	633971	607341	578532	547472	494564	438117	377643	312677	242810	167295	86516.8	0	0	0	0	0	0	0	0	0	0	0	0	0		1
Chile	0	0	0	0	0	0	0	0	0	0	0	0	0	0	0	0	0	0	0	0	0	0	0	0	0	0	0	0	0	0	0	0	0	0	0	0	0	0	0	0	0		2
China	0	0	0	0	0	0	0	0	0	0	0	0	0	0	0	0	0	0	0	0	0	0	0	0	0	0	0	0	0	0	0	0	0	0	0	0	0	0	0	0	0		6
Colombia	0	0	0	0	0	0	0	0	0	0	0	0	0	0	0	0	0	0	0	0	0	0	0	0	0	0	0	0	0	0	0	0	0	0	0	0	0	0	0	0	0		2
Comoros	0	0	0	0	0	0	0	0	0	0	0	0	0	0	0	0	0	0	0	0	0	0	0	0	0	0	0	0	0	0	0	0	0	0	0	0	0	0	0	0	0		1
Congo	211238	217531	224124	231042	238291	245864	253584	261622	269861	278174	286475	293468	283700	273362	262578	251395	240169	228332	215633	201849	186839	167650	147291	125784	103142	79333.4	54202	27803	0	0	0	0	0	0	0	0	0	0	0	0	0		1
Costa Rica	0	0	0	0	0	0	0	0	0	0	0	0	0	0	0	0	0	0	0	0	0	0	0	0	0	0	0	0	0	0	0	0	0	0	0	0	0	0	0	0	0		2
Côte d’Ivoire	1.81446e+06	1.8799e+06	1.94922e+06	2.02164e+06	2.09583e+06	2.17057e+06	2.08639e+06	1.99311e+06	1.88985e+06	1.77603e+06	1.65167e+06	1.50777e+06	1.35699e+06	1.20097e+06	1.04103e+06	877851	713206	543671	368803	187870	0	0	0	0	0	0	0	0	0	0	0	0	0	0	0	0	0	0	0	0	0		1
Croatia	0	0	0	0	0	0	0	0	0	0	0	0	0	0	0	0	0	0	0	0	0	0	0	0	0	0	0	0	0	0	0	0	0	0	0	0	0	0	0	0	0		5
Cuba	0	0	0	0	0	0	0	0	0	0	0	0	0	0	0	0	0	0	0	0	0	0	0	0	0	0	0	0	0	0	0	0	0	0	0	0	0	0	0	0	0		2
Cyprus	0	0	0	0	0	0	0	0	0	0	0	0	0	0	0	0	0	0	0	0	0	0	0	0	0	0	0	0	0	0	0	0	0	0	0	0	0	0	0	0	0		5
Czech Republic	0	0	0	0	0	0	0	0	0	0	0	0	0	0	0	0	0	0	0	0	0	0	0	0	0	0	0	0	0	0	0	0	0	0	0	0	0	0	0	0	0		5
Democratic Republic of the Congo	1.91423e+06	1.98137e+06	2.05574e+06	2.13312e+06	2.20915e+06	2.28171e+06	2.33411e+06	2.38313e+06	2.43269e+06	2.48704e+06	2.54886e+06	2.61375e+06	2.61001e+06	2.60929e+06	2.60952e+06	2.60915e+06	2.59783e+06	2.58763e+06	2.57712e+06	2.56472e+06	2.54949e+06	2.49476e+06	2.43628e+06	2.37322e+06	2.30497e+06	2.23089e+06	2.14418e+06	2.05191e+06	1.95312e+06	1.84689e+06	1.73246e+06	1.60486e+06	1.46933e+06	1.32484e+06	1.17047e+06	1.00547e+06	827377	638554	438194	225570	0		1
Denmark	0	0	0	0	0	0	0	0	0	0	0	0	0	0	0	0	0	0	0	0	0	0	0	0	0	0	0	0	0	0	0	0	0	0	0	0	0	0	0	0	0		5
Djibouti	0	0	0	0	0	0	0	0	0	0	0	0	0	0	0	0	0	0	0	0	0	0	0	0	0	0	0	0	0	0	0	0	0	0	0	0	0	0	0	0	0		4
Dominican Republic	0	0	0	0	0	0	0	0	0	0	0	0	0	0	0	0	0	0	0	0	0	0	0	0	0	0	0	0	0	0	0	0	0	0	0	0	0	0	0	0	0		2
Ecuador	0	0	0	0	0	0	0	0	0	0	0	0	0	0	0	0	0	0	0	0	0	0	0	0	0	0	0	0	0	0	0	0	0	0	0	0	0	0	0	0	0		2
Egypt	0	0	0	0	0	0	0	0	0	0	0	0	0	0	0	0	0	0	0	0	0	0	0	0	0	0	0	0	0	0	0	0	0	0	0	0	0	0	0	0	0		4
El Salvador	0	0	0	0	0	0	0	0	0	0	0	0	0	0	0	0	0	0	0	0	0	0	0	0	0	0	0	0	0	0	0	0	0	0	0	0	0	0	0	0	0		2
Equatorial Guinea	862712	879285	898243	919145	941625	965665	991625	1.01929e+06	1.04959e+06	1.08362e+06	1.08713e+06	1.08838e+06	1.09157e+06	1.09537e+06	1.09793e+06	1.09816e+06	1.09157e+06	1.08294e+06	1.0723e+06	1.06001e+06	1.04613e+06	987204	924904	858244	786342	708831	624613	534998	439885	339171	232555	119382	0	0	0	0	0	0	0	0	0		1
Eritrea	0	0	0	0	0	0	0	0	0	0	0	0	0	0	0	0	0	0	0	0	0	0	0	0	0	0	0	0	0	0	0	0	0	0	0	0	0	0	0	0	0		1
Estonia	0	0	0	0	0	0	0	0	0	0	0	0	0	0	0	0	0	0	0	0	0	0	0	0	0	0	0	0	0	0	0	0	0	0	0	0	0	0	0	0	0		5
Ethiopia	934608	964138	995918	1.02949e+06	1.06428e+06	1.0999e+06	1.13291e+06	1.1664e+06	1.20065e+06	1.23641e+06	1.27434e+06	1.31033e+06	1.28375e+06	1.25575e+06	1.22517e+06	1.19159e+06	1.15496e+06	1.11529e+06	1.07269e+06	1.02713e+06	978152	929274	875917	817562	753648	683700	606568	523171	433060	335879	231406	119396	0	0	0	0	0	0	0	0	0		1
Federated States of Micronesia	0	0	0	0	0	0	0	0	0	0	0	0	0	0	0	0	0	0	0	0	0	0	0	0	0	0	0	0	0	0	0	0	0	0	0	0	0	0	0	0	0		6
Fiji	0	0	0	0	0	0	0	0	0	0	0	0	0	0	0	0	0	0	0	0	0	0	0	0	0	0	0	0	0	0	0	0	0	0	0	0	0	0	0	0	0		6
Finland	0	0	0	0	0	0	0	0	0	0	0	0	0	0	0	0	0	0	0	0	0	0	0	0	0	0	0	0	0	0	0	0	0	0	0	0	0	0	0	0	0		5
France	0	0	0	0	0	0	0	0	0	0	0	0	0	0	0	0	0	0	0	0	0	0	0	0	0	0	0	0	0	0	0	0	0	0	0	0	0	0	0	0	0		5
Gabon	0	0	0	0	0	0	0	0	0	0	0	0	0	0	0	0	0	0	0	0	0	0	0	0	0	0	0	0	0	0	0	0	0	0	0	0	0	0	0	0	0		1
Georgia	0	0	0	0	0	0	0	0	0	0	0	0	0	0	0	0	0	0	0	0	0	0	0	0	0	0	0	0	0	0	0	0	0	0	0	0	0	0	0	0	0		5
Germany	0	0	0	0	0	0	0	0	0	0	0	0	0	0	0	0	0	0	0	0	0	0	0	0	0	0	0	0	0	0	0	0	0	0	0	0	0	0	0	0	0		5
Ghana	994833	1.02486e+06	1.0017e+06	976200	948031	917028	881052	842544	801360	757255	710030	659169	604756	546907	485724	421078	352054	279453	202829	121805	36183.8	34060.6	31796.2	29381.4	26811.7	24082.9	21184.7	18115.5	14870.7	11444.7	7829.68	4015.84	0	0	0	0	0	0	0	0	0		1
Greece	0	0	0	0	0	0	0	0	0	0	0	0	0	0	0	0	0	0	0	0	0	0	0	0	0	0	0	0	0	0	0	0	0	0	0	0	0	0	0	0	0		5
Grenada	0	0	0	0	0	0	0	0	0	0	0	0	0	0	0	0	0	0	0	0	0	0	0	0	0	0	0	0	0	0	0	0	0	0	0	0	0	0	0	0	0		2
Guatemala	0	0	0	0	0	0	0	0	0	0	0	0	0	0	0	0	0	0	0	0	0	0	0	0	0	0	0	0	0	0	0	0	0	0	0	0	0	0	0	0	0		2
Guinea	354360	372612	394220	417291	439642	460033	446016	427885	406977	384592	361428	336410	310610	284073	256773	228561	199213	168671	136480	102282	65869.2	59318.8	52351.9	44932	37027.7	28610.1	19630.1	10103.5	0	0	0	0	0	0	0	0	0	0	0	0	0		1
Guinea-Bissau	48160.7	49470.8	45582.1	41398.4	37048.9	32553.9	27719.4	22718.2	17487.5	11971.2	6145.72	0	0	0	0	0	0	0	0	0	0	0	0	0	0	0	0	0	0	0	0	0	0	0	0	0	0	0	0	0	0		1
Guyana	0	0	0	0	0	0	0	0	0	0	0	0	0	0	0	0	0	0	0	0	0	0	0	0	0	0	0	0	0	0	0	0	0	0	0	0	0	0	0	0	0		2
Haiti	0	0	0	0	0	0	0	0	0	0	0	0	0	0	0	0	0	0	0	0	0	0	0	0	0	0	0	0	0	0	0	0	0	0	0	0	0	0	0	0	0		2
Honduras	0	0	0	0	0	0	0	0	0	0	0	0	0	0	0	0	0	0	0	0	0	0	0	0	0	0	0	0	0	0	0	0	0	0	0	0	0	0	0	0	0		2
Hungary	0	0	0	0	0	0	0	0	0	0	0	0	0	0	0	0	0	0	0	0	0	0	0	0	0	0	0	0	0	0	0	0	0	0	0	0	0	0	0	0	0		5
Iceland	0	0	0	0	0	0	0	0	0	0	0	0	0	0	0	0	0	0	0	0	0	0	0	0	0	0	0	0	0	0	0	0	0	0	0	0	0	0	0	0	0		5
India	0	0	0	0	0	0	0	0	0	0	0	0	0	0	0	0	0	0	0	0	0	0	0	0	0	0	0	0	0	0	0	0	0	0	0	0	0	0	0	0	0		3
Indonesia	0	0	0	0	0	0	0	0	0	0	0	0	0	0	0	0	0	0	0	0	0	0	0	0	0	0	0	0	0	0	0	0	0	0	0	0	0	0	0	0	0		3
Iran	0	0	0	0	0	0	0	0	0	0	0	0	0	0	0	0	0	0	0	0	0	0	0	0	0	0	0	0	0	0	0	0	0	0	0	0	0	0	0	0	0		4
Iraq	0	0	0	0	0	0	0	0	0	0	0	0	0	0	0	0	0	0	0	0	0	0	0	0	0	0	0	0	0	0	0	0	0	0	0	0	0	0	0	0	0		4
Ireland	0	0	0	0	0	0	0	0	0	0	0	0	0	0	0	0	0	0	0	0	0	0	0	0	0	0	0	0	0	0	0	0	0	0	0	0	0	0	0	0	0		5
Israel	0	0	0	0	0	0	0	0	0	0	0	0	0	0	0	0	0	0	0	0	0	0	0	0	0	0	0	0	0	0	0	0	0	0	0	0	0	0	0	0	0		5
Italy	0	0	0	0	0	0	0	0	0	0	0	0	0	0	0	0	0	0	0	0	0	0	0	0	0	0	0	0	0	0	0	0	0	0	0	0	0	0	0	0	0		5
Jamaica	0	0	0	0	0	0	0	0	0	0	0	0	0	0	0	0	0	0	0	0	0	0	0	0	0	0	0	0	0	0	0	0	0	0	0	0	0	0	0	0	0		2
Japan	0	0	0	0	0	0	0	0	0	0	0	0	0	0	0	0	0	0	0	0	0	0	0	0	0	0	0	0	0	0	0	0	0	0	0	0	0	0	0	0	0		6
Jordan	0	0	0	0	0	0	0	0	0	0	0	0	0	0	0	0	0	0	0	0	0	0	0	0	0	0	0	0	0	0	0	0	0	0	0	0	0	0	0	0	0		4
Kazakhstan	0	0	0	0	0	0	0	0	0	0	0	0	0	0	0	0	0	0	0	0	0	0	0	0	0	0	0	0	0	0	0	0	0	0	0	0	0	0	0	0	0		5
Kenya	0	0	0	0	0	0	0	0	0	0	0	0	0	0	0	0	0	0	0	0	0	0	0	0	0	0	0	0	0	0	0	0	0	0	0	0	0	0	0	0	0		1
Kiribati	0	0	0	0	0	0	0	0	0	0	0	0	0	0	0	0	0	0	0	0	0	0	0	0	0	0	0	0	0	0	0	0	0	0	0	0	0	0	0	0	0		6
Kuwait	0	0	0	0	0	0	0	0	0	0	0	0	0	0	0	0	0	0	0	0	0	0	0	0	0	0	0	0	0	0	0	0	0	0	0	0	0	0	0	0	0		4
Kyrgyzstan	0	0	0	0	0	0	0	0	0	0	0	0	0	0	0	0	0	0	0	0	0	0	0	0	0	0	0	0	0	0	0	0	0	0	0	0	0	0	0	0	0		5
Laos	0	0	0	0	0	0	0	0	0	0	0	0	0	0	0	0	0	0	0	0	0	0	0	0	0	0	0	0	0	0	0	0	0	0	0	0	0	0	0	0	0		6
Latvia	0	0	0	0	0	0	0	0	0	0	0	0	0	0	0	0	0	0	0	0	0	0	0	0	0	0	0	0	0	0	0	0	0	0	0	0	0	0	0	0	0		5
Lebanon	0	0	0	0	0	0	0	0	0	0	0	0	0	0	0	0	0	0	0	0	0	0	0	0	0	0	0	0	0	0	0	0	0	0	0	0	0	0	0	0	0		4
Lesotho	0	0	0	0	0	0	0	0	0	0	0	0	0	0	0	0	0	0	0	0	0	0	0	0	0	0	0	0	0	0	0	0	0	0	0	0	0	0	0	0	0		1
Liberia	222550	219119	216121	214958	217286	223847	237430	256451	278130	299111	317352	328765	336726	343106	350300	359813	372442	358316	343156	325591	305040	280184	252635	222844	191140	157545	121768	83712.2	43180.9	0	0	0	0	0	0	0	0	0	0	0	0		1
Libya	0	0	0	0	0	0	0	0	0	0	0	0	0	0	0	0	0	0	0	0	0	0	0	0	0	0	0	0	0	0	0	0	0	0	0	0	0	0	0	0	0		4
Lithuania	0	0	0	0	0	0	0	0	0	0	0	0	0	0	0	0	0	0	0	0	0	0	0	0	0	0	0	0	0	0	0	0	0	0	0	0	0	0	0	0	0		5
Luxembourg	0	0	0	0	0	0	0	0	0	0	0	0	0	0	0	0	0	0	0	0	0	0	0	0	0	0	0	0	0	0	0	0	0	0	0	0	0	0	0	0	0		5
Macedonia	0	0	0	0	0	0	0	0	0	0	0	0	0	0	0	0	0	0	0	0	0	0	0	0	0	0	0	0	0	0	0	0	0	0	0	0	0	0	0	0	0		5
Madagascar	0	0	0	0	0	0	0	0	0	0	0	0	0	0	0	0	0	0	0	0	0	0	0	0	0	0	0	0	0	0	0	0	0	0	0	0	0	0	0	0	0		1
Malawi	112401	115513	117544	119014	120601	122740	124494	127125	124904	122631	120098	117199	114108	110884	107578	104180	100658	96878	92819.3	88479.5	83830.2	75645	67039.7	57834.4	47874.9	37112.3	25594.5	13211.3	0	0	0	0	0	0	0	0	0	0	0	0	0		1
Malaysia	0	0	0	0	0	0	0	0	0	0	0	0	0	0	0	0	0	0	0	0	0	0	0	0	0	0	0	0	0	0	0	0	0	0	0	0	0	0	0	0	0		6
Maldives	0	0	0	0	0	0	0	0	0	0	0	0	0	0	0	0	0	0	0	0	0	0	0	0	0	0	0	0	0	0	0	0	0	0	0	0	0	0	0	0	0		3
Mali	151905	154772	142593	130178	117177	103376	88362.1	72585.5	55957.2	38390.1	19778	0	0	0	0	0	0	0	0	0	0	0	0	0	0	0	0	0	0	0	0	0	0	0	0	0	0	0	0	0	0		1
Malta	0	0	0	0	0	0	0	0	0	0	0	0	0	0	0	0	0	0	0	0	0	0	0	0	0	0	0	0	0	0	0	0	0	0	0	0	0	0	0	0	0		5
Mauritania	0	0	0	0	0	0	0	0	0	0	0	0	0	0	0	0	0	0	0	0	0	0	0	0	0	0	0	0	0	0	0	0	0	0	0	0	0	0	0	0	0		1
Mauritius	0	0	0	0	0	0	0	0	0	0	0	0	0	0	0	0	0	0	0	0	0	0	0	0	0	0	0	0	0	0	0	0	0	0	0	0	0	0	0	0	0		1
Mexico	0	0	0	0	0	0	0	0	0	0	0	0	0	0	0	0	0	0	0	0	0	0	0	0	0	0	0	0	0	0	0	0	0	0	0	0	0	0	0	0	0		2
Moldova	0	0	0	0	0	0	0	0	0	0	0	0	0	0	0	0	0	0	0	0	0	0	0	0	0	0	0	0	0	0	0	0	0	0	0	0	0	0	0	0	0		5
Mongolia	0	0	0	0	0	0	0	0	0	0	0	0	0	0	0	0	0	0	0	0	0	0	0	0	0	0	0	0	0	0	0	0	0	0	0	0	0	0	0	0	0		6
Montenegro	0	0	0	0	0	0	0	0	0	0	0	0	0	0	0	0	0	0	0	0	0	0	0	0	0	0	0	0	0	0	0	0	0	0	0	0	0	0	0	0	0		5
Morocco	0	0	0	0	0	0	0	0	0	0	0	0	0	0	0	0	0	0	0	0	0	0	0	0	0	0	0	0	0	0	0	0	0	0	0	0	0	0	0	0	0		4
Mozambique	0	0	0	0	0	0	0	0	0	0	0	0	0	0	0	0	0	0	0	0	0	0	0	0	0	0	0	0	0	0	0	0	0	0	0	0	0	0	0	0	0		1
Myanmar	0	0	0	0	0	0	0	0	0	0	0	0	0	0	0	0	0	0	0	0	0	0	0	0	0	0	0	0	0	0	0	0	0	0	0	0	0	0	0	0	0		3
Namibia	0	0	0	0	0	0	0	0	0	0	0	0	0	0	0	0	0	0	0	0	0	0	0	0	0	0	0	0	0	0	0	0	0	0	0	0	0	0	0	0	0		1
Nepal	0	0	0	0	0	0	0	0	0	0	0	0	0	0	0	0	0	0	0	0	0	0	0	0	0	0	0	0	0	0	0	0	0	0	0	0	0	0	0	0	0		3
Netherlands	0	0	0	0	0	0	0	0	0	0	0	0	0	0	0	0	0	0	0	0	0	0	0	0	0	0	0	0	0	0	0	0	0	0	0	0	0	0	0	0	0		5
New Zealand	0	0	0	0	0	0	0	0	0	0	0	0	0	0	0	0	0	0	0	0	0	0	0	0	0	0	0	0	0	0	0	0	0	0	0	0	0	0	0	0	0		6
Nicaragua	0	0	0	0	0	0	0	0	0	0	0	0	0	0	0	0	0	0	0	0	0	0	0	0	0	0	0	0	0	0	0	0	0	0	0	0	0	0	0	0	0		2
Niger	13667.4	14106.4	13163.1	12167.4	11087.3	9903.38	8596.65	7161.09	5588.16	3873.35	2012.84	0	0	0	0	0	0	0	0	0	0	0	0	0	0	0	0	0	0	0	0	0	0	0	0	0	0	0	0	0	0		1
Nigeria	8.14725e+06	8.36427e+06	8.59381e+06	8.83593e+06	9.09063e+06	9.35742e+06	9.6096e+06	9.87656e+06	1.01562e+07	9.99376e+06	9.81327e+06	9.58759e+06	9.3485e+06	9.09329e+06	8.81989e+06	8.52664e+06	8.20132e+06	7.85902e+06	7.49654e+06	7.11094e+06	6.70001e+06	6.11386e+06	5.49329e+06	4.83647e+06	4.14174e+06	3.40659e+06	2.62514e+06	1.79989e+06	926143	0	0	0	0	0	0	0	0	0	0	0	0		1
North Korea	0	0	0	0	0	0	0	0	0	0	0	0	0	0	0	0	0	0	0	0	0	0	0	0	0	0	0	0	0	0	0	0	0	0	0	0	0	0	0	0	0		3
Norway	0	0	0	0	0	0	0	0	0	0	0	0	0	0	0	0	0	0	0	0	0	0	0	0	0	0	0	0	0	0	0	0	0	0	0	0	0	0	0	0	0		5
Oman	0	0	0	0	0	0	0	0	0	0	0	0	0	0	0	0	0	0	0	0	0	0	0	0	0	0	0	0	0	0	0	0	0	0	0	0	0	0	0	0	0		4
Pakistan	0	0	0	0	0	0	0	0	0	0	0	0	0	0	0	0	0	0	0	0	0	0	0	0	0	0	0	0	0	0	0	0	0	0	0	0	0	0	0	0	0		4
Palestine	0	0	0	0	0	0	0	0	0	0	0	0	0	0	0	0	0	0	0	0	0	0	0	0	0	0	0	0	0	0	0	0	0	0	0	0	0	0	0	0	0		4
Panama	0	0	0	0	0	0	0	0	0	0	0	0	0	0	0	0	0	0	0	0	0	0	0	0	0	0	0	0	0	0	0	0	0	0	0	0	0	0	0	0	0		2
Papua New Guinea	0	0	0	0	0	0	0	0	0	0	0	0	0	0	0	0	0	0	0	0	0	0	0	0	0	0	0	0	0	0	0	0	0	0	0	0	0	0	0	0	0		6
Paraguay	0	0	0	0	0	0	0	0	0	0	0	0	0	0	0	0	0	0	0	0	0	0	0	0	0	0	0	0	0	0	0	0	0	0	0	0	0	0	0	0	0		2
Peru	0	0	0	0	0	0	0	0	0	0	0	0	0	0	0	0	0	0	0	0	0	0	0	0	0	0	0	0	0	0	0	0	0	0	0	0	0	0	0	0	0		2
Philippines	0	0	0	0	0	0	0	0	0	0	0	0	0	0	0	0	0	0	0	0	0	0	0	0	0	0	0	0	0	0	0	0	0	0	0	0	0	0	0	0	0		6
Poland	0	0	0	0	0	0	0	0	0	0	0	0	0	0	0	0	0	0	0	0	0	0	0	0	0	0	0	0	0	0	0	0	0	0	0	0	0	0	0	0	0		5
Portugal	0	0	0	0	0	0	0	0	0	0	0	0	0	0	0	0	0	0	0	0	0	0	0	0	0	0	0	0	0	0	0	0	0	0	0	0	0	0	0	0	0		5
Qatar	0	0	0	0	0	0	0	0	0	0	0	0	0	0	0	0	0	0	0	0	0	0	0	0	0	0	0	0	0	0	0	0	0	0	0	0	0	0	0	0	0		4
Romania	0	0	0	0	0	0	0	0	0	0	0	0	0	0	0	0	0	0	0	0	0	0	0	0	0	0	0	0	0	0	0	0	0	0	0	0	0	0	0	0	0		5
Russia	0	0	0	0	0	0	0	0	0	0	0	0	0	0	0	0	0	0	0	0	0	0	0	0	0	0	0	0	0	0	0	0	0	0	0	0	0	0	0	0	0		5
Rwanda	0	0	0	0	0	0	0	0	0	0	0	0	0	0	0	0	0	0	0	0	0	0	0	0	0	0	0	0	0	0	0	0	0	0	0	0	0	0	0	0	0		1
Saint Lucia	0	0	0	0	0	0	0	0	0	0	0	0	0	0	0	0	0	0	0	0	0	0	0	0	0	0	0	0	0	0	0	0	0	0	0	0	0	0	0	0	0		2
Saint Vincent and the Grenadines	0	0	0	0	0	0	0	0	0	0	0	0	0	0	0	0	0	0	0	0	0	0	0	0	0	0	0	0	0	0	0	0	0	0	0	0	0	0	0	0	0		2
Samoa	0	0	0	0	0	0	0	0	0	0	0	0	0	0	0	0	0	0	0	0	0	0	0	0	0	0	0	0	0	0	0	0	0	0	0	0	0	0	0	0	0		6
São Tomé and Príncipe	0	0	0	0	0	0	0	0	0	0	0	0	0	0	0	0	0	0	0	0	0	0	0	0	0	0	0	0	0	0	0	0	0	0	0	0	0	0	0	0	0		1
Saudi Arabia	0	0	0	0	0	0	0	0	0	0	0	0	0	0	0	0	0	0	0	0	0	0	0	0	0	0	0	0	0	0	0	0	0	0	0	0	0	0	0	0	0		4
Senegal	8148.1	8403.11	7811.95	7176.71	6486.2	5736.07	4898.14	4012.49	3081.88	2106.22	1081.19	0	0	0	0	0	0	0	0	0	0	0	0	0	0	0	0	0	0	0	0	0	0	0	0	0	0	0	0	0	0		1
Serbia	0	0	0	0	0	0	0	0	0	0	0	0	0	0	0	0	0	0	0	0	0	0	0	0	0	0	0	0	0	0	0	0	0	0	0	0	0	0	0	0	0		5
Seychelles	0	0	0	0	0	0	0	0	0	0	0	0	0	0	0	0	0	0	0	0	0	0	0	0	0	0	0	0	0	0	0	0	0	0	0	0	0	0	0	0	0		1
Sierra Leone	398780	399637	397975	395127	392651	391550	391485	393335	397735	405399	416509	432102	452520	475553	498579	520027	472823	419928	362625	301988	238380	213443	187290	159876	131113	100875	68835.9	35269.8	0	0	0	0	0	0	0	0	0	0	0	0	0		1
Singapore	0	0	0	0	0	0	0	0	0	0	0	0	0	0	0	0	0	0	0	0	0	0	0	0	0	0	0	0	0	0	0	0	0	0	0	0	0	0	0	0	0		6
Slovakia	0	0	0	0	0	0	0	0	0	0	0	0	0	0	0	0	0	0	0	0	0	0	0	0	0	0	0	0	0	0	0	0	0	0	0	0	0	0	0	0	0		5
Slovenia	0	0	0	0	0	0	0	0	0	0	0	0	0	0	0	0	0	0	0	0	0	0	0	0	0	0	0	0	0	0	0	0	0	0	0	0	0	0	0	0	0		5
Solomon Islands	0	0	0	0	0	0	0	0	0	0	0	0	0	0	0	0	0	0	0	0	0	0	0	0	0	0	0	0	0	0	0	0	0	0	0	0	0	0	0	0	0		6
Somalia	0	0	0	0	0	0	0	0	0	0	0	0	0	0	0	0	0	0	0	0	0	0	0	0	0	0	0	0	0	0	0	0	0	0	0	0	0	0	0	0	0		4
South Africa	0	0	0	0	0	0	0	0	0	0	0	0	0	0	0	0	0	0	0	0	0	0	0	0	0	0	0	0	0	0	0	0	0	0	0	0	0	0	0	0	0		1
South Korea	0	0	0	0	0	0	0	0	0	0	0	0	0	0	0	0	0	0	0	0	0	0	0	0	0	0	0	0	0	0	0	0	0	0	0	0	0	0	0	0	0		6
Spain	0	0	0	0	0	0	0	0	0	0	0	0	0	0	0	0	0	0	0	0	0	0	0	0	0	0	0	0	0	0	0	0	0	0	0	0	0	0	0	0	0		5
Sri Lanka	0	0	0	0	0	0	0	0	0	0	0	0	0	0	0	0	0	0	0	0	0	0	0	0	0	0	0	0	0	0	0	0	0	0	0	0	0	0	0	0	0		3
Sudan	3.36025e+06	3.46504e+06	3.57956e+06	3.7014e+06	3.82764e+06	3.95633e+06	4.07333e+06	4.19476e+06	4.32081e+06	4.45187e+06	4.58862e+06	4.7248e+06	4.86772e+06	5.01813e+06	5.17763e+06	5.34691e+06	5.51536e+06	5.69662e+06	5.88799e+06	5.37518e+06	4.81952e+06	4.35059e+06	3.84569e+06	3.3045e+06	2.72647e+06	2.10967e+06	1.44923e+06	746916	0	0	0	0	0	0	0	0	0	0	0	0	0		4
Suriname	0	0	0	0	0	0	0	0	0	0	0	0	0	0	0	0	0	0	0	0	0	0	0	0	0	0	0	0	0	0	0	0	0	0	0	0	0	0	0	0	0		2
Swaziland	0	0	0	0	0	0	0	0	0	0	0	0	0	0	0	0	0	0	0	0	0	0	0	0	0	0	0	0	0	0	0	0	0	0	0	0	0	0	0	0	0		1
Sweden	0	0	0	0	0	0	0	0	0	0	0	0	0	0	0	0	0	0	0	0	0	0	0	0	0	0	0	0	0	0	0	0	0	0	0	0	0	0	0	0	0		5
Switzerland	0	0	0	0	0	0	0	0	0	0	0	0	0	0	0	0	0	0	0	0	0	0	0	0	0	0	0	0	0	0	0	0	0	0	0	0	0	0	0	0	0		5
Syria	0	0	0	0	0	0	0	0	0	0	0	0	0	0	0	0	0	0	0	0	0	0	0	0	0	0	0	0	0	0	0	0	0	0	0	0	0	0	0	0	0		4
Tajikistan	0	0	0	0	0	0	0	0	0	0	0	0	0	0	0	0	0	0	0	0	0	0	0	0	0	0	0	0	0	0	0	0	0	0	0	0	0	0	0	0	0		5
Tanzania	766472	792573	821286	851704	882684	913577	940608	967419	994522	980678	965765	947793	928629	908159	886230	862651	836549	808833	779168	747317	713081	653224	589655	521729	448892	370788	287095	197566	101981	0	0	0	0	0	0	0	0	0	0	0	0		1
Thailand	0	0	0	0	0	0	0	0	0	0	0	0	0	0	0	0	0	0	0	0	0	0	0	0	0	0	0	0	0	0	0	0	0	0	0	0	0	0	0	0	0		3
The Bahamas	0	0	0	0	0	0	0	0	0	0	0	0	0	0	0	0	0	0	0	0	0	0	0	0	0	0	0	0	0	0	0	0	0	0	0	0	0	0	0	0	0		2
The Gambia	0	0	0	0	0	0	0	0	0	0	0	0	0	0	0	0	0	0	0	0	0	0	0	0	0	0	0	0	0	0	0	0	0	0	0	0	0	0	0	0	0		1
Timor-Leste	0	0	0	0	0	0	0	0	0	0	0	0	0	0	0	0	0	0	0	0	0	0	0	0	0	0	0	0	0	0	0	0	0	0	0	0	0	0	0	0	0		3
Togo	99965.4	102151	99169.9	96045.1	92840	89586.2	86456.3	83204.2	79772.2	76095.3	72117.4	67778.9	63103.1	58053.8	52598.3	46710.3	40309.5	33478	26185.7	18407	10123.7	9121.44	8049.05	6904.67	5686.86	4392.19	3013.1	1551.36	0	0	0	0	0	0	0	0	0	0	0	0	0		1
Tonga	0	0	0	0	0	0	0	0	0	0	0	0	0	0	0	0	0	0	0	0	0	0	0	0	0	0	0	0	0	0	0	0	0	0	0	0	0	0	0	0	0		6
Trinidad and Tobago	0	0	0	0	0	0	0	0	0	0	0	0	0	0	0	0	0	0	0	0	0	0	0	0	0	0	0	0	0	0	0	0	0	0	0	0	0	0	0	0	0		2
Tunisia	0	0	0	0	0	0	0	0	0	0	0	0	0	0	0	0	0	0	0	0	0	0	0	0	0	0	0	0	0	0	0	0	0	0	0	0	0	0	0	0	0		4
Turkey	0	0	0	0	0	0	0	0	0	0	0	0	0	0	0	0	0	0	0	0	0	0	0	0	0	0	0	0	0	0	0	0	0	0	0	0	0	0	0	0	0		5
Turkmenistan	0	0	0	0	0	0	0	0	0	0	0	0	0	0	0	0	0	0	0	0	0	0	0	0	0	0	0	0	0	0	0	0	0	0	0	0	0	0	0	0	0		5
Uganda	431493	444583	458189	472328	487071	502503	516586	531651	547760	564936	554162	542226	529429	515591	500590	484256	465710	445702	423920	400059	373905	344665	312865	278291	240741	199985	155594	107644	55867	0	0	0	0	0	0	0	0	0	0	0	0		1
Ukraine	0	0	0	0	0	0	0	0	0	0	0	0	0	0	0	0	0	0	0	0	0	0	0	0	0	0	0	0	0	0	0	0	0	0	0	0	0	0	0	0	0		5
United Arab Emirates	0	0	0	0	0	0	0	0	0	0	0	0	0	0	0	0	0	0	0	0	0	0	0	0	0	0	0	0	0	0	0	0	0	0	0	0	0	0	0	0	0		4
United Kingdom	0	0	0	0	0	0	0	0	0	0	0	0	0	0	0	0	0	0	0	0	0	0	0	0	0	0	0	0	0	0	0	0	0	0	0	0	0	0	0	0	0		5
United States	0	0	0	0	0	0	0	0	0	0	0	0	0	0	0	0	0	0	0	0	0	0	0	0	0	0	0	0	0	0	0	0	0	0	0	0	0	0	0	0	0		2
Uruguay	0	0	0	0	0	0	0	0	0	0	0	0	0	0	0	0	0	0	0	0	0	0	0	0	0	0	0	0	0	0	0	0	0	0	0	0	0	0	0	0	0		2
Uzbekistan	0	0	0	0	0	0	0	0	0	0	0	0	0	0	0	0	0	0	0	0	0	0	0	0	0	0	0	0	0	0	0	0	0	0	0	0	0	0	0	0	0		5
Vanuatu	0	0	0	0	0	0	0	0	0	0	0	0	0	0	0	0	0	0	0	0	0	0	0	0	0	0	0	0	0	0	0	0	0	0	0	0	0	0	0	0	0		6
Venezuela	0	0	0	0	0	0	0	0	0	0	0	0	0	0	0	0	0	0	0	0	0	0	0	0	0	0	0	0	0	0	0	0	0	0	0	0	0	0	0	0	0		2
Vietnam	0	0	0	0	0	0	0	0	0	0	0	0	0	0	0	0	0	0	0	0	0	0	0	0	0	0	0	0	0	0	0	0	0	0	0	0	0	0	0	0	0		6
Yemen	0	0	0	0	0	0	0	0	0	0	0	0	0	0	0	0	0	0	0	0	0	0	0	0	0	0	0	0	0	0	0	0	0	0	0	0	0	0	0	0	0		4
Zambia	0	0	0	0	0	0	0	0	0	0	0	0	0	0	0	0	0	0	0	0	0	0	0	0	0	0	0	0	0	0	0	0	0	0	0	0	0	0	0	0	0		1
Zimbabwe	0	0	0	0	0	0	0	0	0	0	0	0	0	0	0	0	0	0	0	0	0	0	0	0	0	0	0	0	0	0	0	0	0	0	0	0	0	0	0	0	0		1
	0	0	0	0	0	0	0	0	0	0	0	0	0	0	0	0	0	0	0	0	0	0	0	0	0	0	0	0	0	0	0	0	0	0	0	0	0	0	0	0	0
	0	0	0	0	0	0	0	0	0	0	0	0	0	0	0	0	0	0	0	0	0	0	0	0	0	0	0	0	0	0	0	0	0	0	0	0	0	0	0	0	0
	0	0	0	0	0	0	0	0	0	0	0	0	0	0	0	0	0	0	0	0	0	0	0	0	0	0	0	0	0	0	0	0	0	0	0	0	0	0	0	0	0
WOMEN	0	0	0	0	0	0	0	0	0	0	0	0	0	0	0	0	0	0	0	0	0	0	0	0	0	0	0	0	0	0	0	0	0	0	0	0	0	0	0	0	0
Afghanistan	0	0	0	0	0	0	0	0	0	0	0	0	0	0	0	0	0	0	0	0	0	0	0	0	0	0	0	0	0	0	0	0	0	0	0	0	0	0	0	0	0		4
Albania	0	0	0	0	0	0	0	0	0	0	0	0	0	0	0	0	0	0	0	0	0	0	0	0	0	0	0	0	0	0	0	0	0	0	0	0	0	0	0	0	0		5
Algeria	0	0	0	0	0	0	0	0	0	0	0	0	0	0	0	0	0	0	0	0	0	0	0	0	0	0	0	0	0	0	0	0	0	0	0	0	0	0	0	0	0		1
Angola	368753	378713	390412	403271	416565	429897	441067	452476	464584	477946	492836	507868	524796	543214	562646	582792	574698	565865	556127	545409	533637	489561	442725	392597	338665	280547	217715	150187	77723.9	0	0	0	0	0	0	0	0	0	0	0	0		1
Antigua and Barbuda	0	0	0	0	0	0	0	0	0	0	0	0	0	0	0	0	0	0	0	0	0	0	0	0	0	0	0	0	0	0	0	0	0	0	0	0	0	0	0	0	0		2
Argentina	0	0	0	0	0	0	0	0	0	0	0	0	0	0	0	0	0	0	0	0	0	0	0	0	0	0	0	0	0	0	0	0	0	0	0	0	0	0	0	0	0		2
Armenia	0	0	0	0	0	0	0	0	0	0	0	0	0	0	0	0	0	0	0	0	0	0	0	0	0	0	0	0	0	0	0	0	0	0	0	0	0	0	0	0	0		5
Australia	0	0	0	0	0	0	0	0	0	0	0	0	0	0	0	0	0	0	0	0	0	0	0	0	0	0	0	0	0	0	0	0	0	0	0	0	0	0	0	0	0		6
Austria	0	0	0	0	0	0	0	0	0	0	0	0	0	0	0	0	0	0	0	0	0	0	0	0	0	0	0	0	0	0	0	0	0	0	0	0	0	0	0	0	0		5
Azerbaijan	0	0	0	0	0	0	0	0	0	0	0	0	0	0	0	0	0	0	0	0	0	0	0	0	0	0	0	0	0	0	0	0	0	0	0	0	0	0	0	0	0		5
Bahrain	0	0	0	0	0	0	0	0	0	0	0	0	0	0	0	0	0	0	0	0	0	0	0	0	0	0	0	0	0	0	0	0	0	0	0	0	0	0	0	0	0		4
Bangladesh	0	0	0	0	0	0	0	0	0	0	0	0	0	0	0	0	0	0	0	0	0	0	0	0	0	0	0	0	0	0	0	0	0	0	0	0	0	0	0	0	0		3
Barbados	0	0	0	0	0	0	0	0	0	0	0	0	0	0	0	0	0	0	0	0	0	0	0	0	0	0	0	0	0	0	0	0	0	0	0	0	0	0	0	0	0		2
Belarus	0	0	0	0	0	0	0	0	0	0	0	0	0	0	0	0	0	0	0	0	0	0	0	0	0	0	0	0	0	0	0	0	0	0	0	0	0	0	0	0	0		5
Belgium	0	0	0	0	0	0	0	0	0	0	0	0	0	0	0	0	0	0	0	0	0	0	0	0	0	0	0	0	0	0	0	0	0	0	0	0	0	0	0	0	0		5
Belize	0	0	0	0	0	0	0	0	0	0	0	0	0	0	0	0	0	0	0	0	0	0	0	0	0	0	0	0	0	0	0	0	0	0	0	0	0	0	0	0	0		2
Benin	591038	610735	602171	592631	581395	568064	550322	530849	509842	487517	463931	439213	412838	384479	353839	320670	284356	245420	203620	158743	110639	99853.7	88268.5	75855.1	62584	48413.4	33270.7	17150.5	0	0	0	0	0	0	0	0	0	0	0	0	0		1
Bhutan	0	0	0	0	0	0	0	0	0	0	0	0	0	0	0	0	0	0	0	0	0	0	0	0	0	0	0	0	0	0	0	0	0	0	0	0	0	0	0	0	0		3
Bolivia	0	0	0	0	0	0	0	0	0	0	0	0	0	0	0	0	0	0	0	0	0	0	0	0	0	0	0	0	0	0	0	0	0	0	0	0	0	0	0	0	0		2
Bosnia and Herzegovina	0	0	0	0	0	0	0	0	0	0	0	0	0	0	0	0	0	0	0	0	0	0	0	0	0	0	0	0	0	0	0	0	0	0	0	0	0	0	0	0	0		5
Botswana	0	0	0	0	0	0	0	0	0	0	0	0	0	0	0	0	0	0	0	0	0	0	0	0	0	0	0	0	0	0	0	0	0	0	0	0	0	0	0	0	0		1
Brazil	0	0	0	0	0	0	0	0	0	0	0	0	0	0	0	0	0	0	0	0	0	0	0	0	0	0	0	0	0	0	0	0	0	0	0	0	0	0	0	0	0		2
Brunei	0	0	0	0	0	0	0	0	0	0	0	0	0	0	0	0	0	0	0	0	0	0	0	0	0	0	0	0	0	0	0	0	0	0	0	0	0	0	0	0	0		6
Bulgaria	0	0	0	0	0	0	0	0	0	0	0	0	0	0	0	0	0	0	0	0	0	0	0	0	0	0	0	0	0	0	0	0	0	0	0	0	0	0	0	0	0		5
Burkina Faso	618171	633013	584060	532820	478972	422163	360861	296529	228664	156832	80705	0	0	0	0	0	0	0	0	0	0	0	0	0	0	0	0	0	0	0	0	0	0	0	0	0	0	0	0	0	0		1
Burundi	149818	151969	154347	156860	159359	161787	163103	164328	165804	167969	171118	177272	184543	192729	201484	210509	203300	195030	185529	174702	162534	146820	129849	111595	92043.7	71172.7	48867.4	25175.2	0	0	0	0	0	0	0	0	0	0	0	0	0		1
Cambodia	0	0	0	0	0	0	0	0	0	0	0	0	0	0	0	0	0	0	0	0	0	0	0	0	0	0	0	0	0	0	0	0	0	0	0	0	0	0	0	0	0		6
Cameroon	3.19475e+06	3.28155e+06	3.37313e+06	3.46951e+06	3.57114e+06	3.67831e+06	3.78192e+06	3.89159e+06	4.00709e+06	4.12775e+06	4.08228e+06	4.02181e+06	3.95554e+06	3.88322e+06	3.80479e+06	3.7198e+06	3.61963e+06	3.5141e+06	3.40136e+06	3.27959e+06	3.14779e+06	2.96642e+06	2.77337e+06	2.56768e+06	2.34862e+06	2.11534e+06	1.86463e+06	1.5986e+06	1.31614e+06	1.01614e+06	697500	358716	0	0	0	0	0	0	0	0	0		1
Canada	0	0	0	0	0	0	0	0	0	0	0	0	0	0	0	0	0	0	0	0	0	0	0	0	0	0	0	0	0	0	0	0	0	0	0	0	0	0	0	0	0		2
Cape Verde	0	0	0	0	0	0	0	0	0	0	0	0	0	0	0	0	0	0	0	0	0	0	0	0	0	0	0	0	0	0	0	0	0	0	0	0	0	0	0	0	0		1
Central African Republic	241767	247101	253172	259800	266716	273728	280000	286260	292542	298933	292510	284196	275708	267011	258064	248879	239532	229982	220119	209837	199039	186847	173979	160413	146136	131100	114972	98120.2	80424.4	61790.4	42182.9	21580.9	0	0	0	0	0	0	0	0	0		1
Chad	509895	522806	536586	551321	567155	584177	600213	617833	637089	629246	621141	611040	600732	589471	576596	561768	542975	522284	499799	475617	449687	405775	359089	309212	255757	198401	136579	70570.8	0	0	0	0	0	0	0	0	0	0	0	0	0		1
Chile	0	0	0	0	0	0	0	0	0	0	0	0	0	0	0	0	0	0	0	0	0	0	0	0	0	0	0	0	0	0	0	0	0	0	0	0	0	0	0	0	0		2
China	0	0	0	0	0	0	0	0	0	0	0	0	0	0	0	0	0	0	0	0	0	0	0	0	0	0	0	0	0	0	0	0	0	0	0	0	0	0	0	0	0		6
Colombia	0	0	0	0	0	0	0	0	0	0	0	0	0	0	0	0	0	0	0	0	0	0	0	0	0	0	0	0	0	0	0	0	0	0	0	0	0	0	0	0	0		2
Comoros	0	0	0	0	0	0	0	0	0	0	0	0	0	0	0	0	0	0	0	0	0	0	0	0	0	0	0	0	0	0	0	0	0	0	0	0	0	0	0	0	0		1
Congo	167306	172193	177306	182656	188240	194048	199943	206058	212304	218589	224850	230154	222279	213964	205316	196380	187437	178037	167980	157086	145249	130318	114479	97751.8	80145.8	61637.1	42112.4	21601.2	0	0	0	0	0	0	0	0	0	0	0	0	0		1
Costa Rica	0	0	0	0	0	0	0	0	0	0	0	0	0	0	0	0	0	0	0	0	0	0	0	0	0	0	0	0	0	0	0	0	0	0	0	0	0	0	0	0	0		2
Côte d’Ivoire	1.3917e+06	1.44678e+06	1.50485e+06	1.56531e+06	1.62719e+06	1.6896e+06	1.62911e+06	1.56077e+06	1.48417e+06	1.39903e+06	1.30539e+06	1.19711e+06	1.08276e+06	963226	839193	711046	580304	444212	302520	154695	0	0	0	0	0	0	0	0	0	0	0	0	0	0	0	0	0	0	0	0	0		1
Croatia	0	0	0	0	0	0	0	0	0	0	0	0	0	0	0	0	0	0	0	0	0	0	0	0	0	0	0	0	0	0	0	0	0	0	0	0	0	0	0	0	0		5
Cuba	0	0	0	0	0	0	0	0	0	0	0	0	0	0	0	0	0	0	0	0	0	0	0	0	0	0	0	0	0	0	0	0	0	0	0	0	0	0	0	0	0		2
Cyprus	0	0	0	0	0	0	0	0	0	0	0	0	0	0	0	0	0	0	0	0	0	0	0	0	0	0	0	0	0	0	0	0	0	0	0	0	0	0	0	0	0		5
Czech Republic	0	0	0	0	0	0	0	0	0	0	0	0	0	0	0	0	0	0	0	0	0	0	0	0	0	0	0	0	0	0	0	0	0	0	0	0	0	0	0	0	0		5
Democratic Republic of the Congo	1.72236e+06	1.7794e+06	1.84275e+06	1.90862e+06	1.97306e+06	2.03412e+06	2.07793e+06	2.11844e+06	2.15912e+06	2.20384e+06	2.25507e+06	2.30944e+06	2.30173e+06	2.29674e+06	2.29253e+06	2.28771e+06	2.27429e+06	2.26158e+06	2.2484e+06	2.2335e+06	2.21614e+06	2.16751e+06	2.11581e+06	2.06022e+06	2.00008e+06	1.93482e+06	1.85941e+06	1.779e+06	1.69286e+06	1.60033e+06	1.50081e+06	1.39042e+06	1.27313e+06	1.14802e+06	1.01429e+06	871302	717203	553663	380013	195650	0		1
Denmark	0	0	0	0	0	0	0	0	0	0	0	0	0	0	0	0	0	0	0	0	0	0	0	0	0	0	0	0	0	0	0	0	0	0	0	0	0	0	0	0	0		5
Djibouti	0	0	0	0	0	0	0	0	0	0	0	0	0	0	0	0	0	0	0	0	0	0	0	0	0	0	0	0	0	0	0	0	0	0	0	0	0	0	0	0	0		4
Dominican Republic	0	0	0	0	0	0	0	0	0	0	0	0	0	0	0	0	0	0	0	0	0	0	0	0	0	0	0	0	0	0	0	0	0	0	0	0	0	0	0	0	0		2
Ecuador	0	0	0	0	0	0	0	0	0	0	0	0	0	0	0	0	0	0	0	0	0	0	0	0	0	0	0	0	0	0	0	0	0	0	0	0	0	0	0	0	0		2
Egypt	0	0	0	0	0	0	0	0	0	0	0	0	0	0	0	0	0	0	0	0	0	0	0	0	0	0	0	0	0	0	0	0	0	0	0	0	0	0	0	0	0		4
El Salvador	0	0	0	0	0	0	0	0	0	0	0	0	0	0	0	0	0	0	0	0	0	0	0	0	0	0	0	0	0	0	0	0	0	0	0	0	0	0	0	0	0		2
Equatorial Guinea	704502	717021	731087	746431	762979	780884	800569	821558	844601	870642	872037	871852	873273	875297	876546	876164	871280	864895	856942	847609	836888	790798	741802	689154	632186	570597	503515	431921	355677	274654	188593	96981.2	0	0	0	0	0	0	0	0	0		1
Eritrea	0	0	0	0	0	0	0	0	0	0	0	0	0	0	0	0	0	0	0	0	0	0	0	0	0	0	0	0	0	0	0	0	0	0	0	0	0	0	0	0	0		1
Estonia	0	0	0	0	0	0	0	0	0	0	0	0	0	0	0	0	0	0	0	0	0	0	0	0	0	0	0	0	0	0	0	0	0	0	0	0	0	0	0	0	0		5
Ethiopia	765862	790234	817012	845610	875170	905108	931039	957408	984491	1.01292e+06	1.04317e+06	1.07266e+06	1.05011e+06	1.02619e+06	1.00013e+06	971643	941192	908103	872362	833936	792545	752600	709039	661465	609444	552599	490097	422577	349679	271117	186723	96329.7	0	0	0	0	0	0	0	0	0		1
Federated States of Micronesia	0	0	0	0	0	0	0	0	0	0	0	0	0	0	0	0	0	0	0	0	0	0	0	0	0	0	0	0	0	0	0	0	0	0	0	0	0	0	0	0	0		6
Fiji	0	0	0	0	0	0	0	0	0	0	0	0	0	0	0	0	0	0	0	0	0	0	0	0	0	0	0	0	0	0	0	0	0	0	0	0	0	0	0	0	0		6
Finland	0	0	0	0	0	0	0	0	0	0	0	0	0	0	0	0	0	0	0	0	0	0	0	0	0	0	0	0	0	0	0	0	0	0	0	0	0	0	0	0	0		5
France	0	0	0	0	0	0	0	0	0	0	0	0	0	0	0	0	0	0	0	0	0	0	0	0	0	0	0	0	0	0	0	0	0	0	0	0	0	0	0	0	0		5
Gabon	0	0	0	0	0	0	0	0	0	0	0	0	0	0	0	0	0	0	0	0	0	0	0	0	0	0	0	0	0	0	0	0	0	0	0	0	0	0	0	0	0		1
Georgia	0	0	0	0	0	0	0	0	0	0	0	0	0	0	0	0	0	0	0	0	0	0	0	0	0	0	0	0	0	0	0	0	0	0	0	0	0	0	0	0	0		5
Germany	0	0	0	0	0	0	0	0	0	0	0	0	0	0	0	0	0	0	0	0	0	0	0	0	0	0	0	0	0	0	0	0	0	0	0	0	0	0	0	0	0		5
Ghana	805784	832943	817328	799682	779236	755606	726851	695374	661544	625674	587814	549022	507354	462486	414108	361839	304834	243617	177670	106660	30586.7	28748.1	26761.7	24642.3	22407.2	20063.8	17604	15021.2	12308.4	9457.26	6459.97	3308.28	0	0	0	0	0	0	0	0	0		1
Greece	0	0	0	0	0	0	0	0	0	0	0	0	0	0	0	0	0	0	0	0	0	0	0	0	0	0	0	0	0	0	0	0	0	0	0	0	0	0	0	0	0		5
Grenada	0	0	0	0	0	0	0	0	0	0	0	0	0	0	0	0	0	0	0	0	0	0	0	0	0	0	0	0	0	0	0	0	0	0	0	0	0	0	0	0	0		2
Guatemala	0	0	0	0	0	0	0	0	0	0	0	0	0	0	0	0	0	0	0	0	0	0	0	0	0	0	0	0	0	0	0	0	0	0	0	0	0	0	0	0	0		2
Guinea	292834	307629	325112	343719	361636	377829	365827	350417	332723	313844	294382	273581	252216	230351	207994	185038	161439	136983	111280	84027.3	55056.9	49547.3	43693.7	37468.9	30850.2	23815.8	16329.5	8399.09	0	0	0	0	0	0	0	0	0	0	0	0	0		1
Guinea-Bissau	38119.9	39181.8	36119.7	32815.3	29370.7	25803.3	21974.1	18005.5	13851.9	9473.46	4857.04	0	0	0	0	0	0	0	0	0	0	0	0	0	0	0	0	0	0	0	0	0	0	0	0	0	0	0	0	0	0		1
Guyana	0	0	0	0	0	0	0	0	0	0	0	0	0	0	0	0	0	0	0	0	0	0	0	0	0	0	0	0	0	0	0	0	0	0	0	0	0	0	0	0	0		2
Haiti	0	0	0	0	0	0	0	0	0	0	0	0	0	0	0	0	0	0	0	0	0	0	0	0	0	0	0	0	0	0	0	0	0	0	0	0	0	0	0	0	0		2
Honduras	0	0	0	0	0	0	0	0	0	0	0	0	0	0	0	0	0	0	0	0	0	0	0	0	0	0	0	0	0	0	0	0	0	0	0	0	0	0	0	0	0		2
Hungary	0	0	0	0	0	0	0	0	0	0	0	0	0	0	0	0	0	0	0	0	0	0	0	0	0	0	0	0	0	0	0	0	0	0	0	0	0	0	0	0	0		5
Iceland	0	0	0	0	0	0	0	0	0	0	0	0	0	0	0	0	0	0	0	0	0	0	0	0	0	0	0	0	0	0	0	0	0	0	0	0	0	0	0	0	0		5
India	0	0	0	0	0	0	0	0	0	0	0	0	0	0	0	0	0	0	0	0	0	0	0	0	0	0	0	0	0	0	0	0	0	0	0	0	0	0	0	0	0		3
Indonesia	0	0	0	0	0	0	0	0	0	0	0	0	0	0	0	0	0	0	0	0	0	0	0	0	0	0	0	0	0	0	0	0	0	0	0	0	0	0	0	0	0		3
Iran	0	0	0	0	0	0	0	0	0	0	0	0	0	0	0	0	0	0	0	0	0	0	0	0	0	0	0	0	0	0	0	0	0	0	0	0	0	0	0	0	0		4
Iraq	0	0	0	0	0	0	0	0	0	0	0	0	0	0	0	0	0	0	0	0	0	0	0	0	0	0	0	0	0	0	0	0	0	0	0	0	0	0	0	0	0		4
Ireland	0	0	0	0	0	0	0	0	0	0	0	0	0	0	0	0	0	0	0	0	0	0	0	0	0	0	0	0	0	0	0	0	0	0	0	0	0	0	0	0	0		5
Israel	0	0	0	0	0	0	0	0	0	0	0	0	0	0	0	0	0	0	0	0	0	0	0	0	0	0	0	0	0	0	0	0	0	0	0	0	0	0	0	0	0		5
Italy	0	0	0	0	0	0	0	0	0	0	0	0	0	0	0	0	0	0	0	0	0	0	0	0	0	0	0	0	0	0	0	0	0	0	0	0	0	0	0	0	0		5
Jamaica	0	0	0	0	0	0	0	0	0	0	0	0	0	0	0	0	0	0	0	0	0	0	0	0	0	0	0	0	0	0	0	0	0	0	0	0	0	0	0	0	0		2
Japan	0	0	0	0	0	0	0	0	0	0	0	0	0	0	0	0	0	0	0	0	0	0	0	0	0	0	0	0	0	0	0	0	0	0	0	0	0	0	0	0	0		6
Jordan	0	0	0	0	0	0	0	0	0	0	0	0	0	0	0	0	0	0	0	0	0	0	0	0	0	0	0	0	0	0	0	0	0	0	0	0	0	0	0	0	0		4
Kazakhstan	0	0	0	0	0	0	0	0	0	0	0	0	0	0	0	0	0	0	0	0	0	0	0	0	0	0	0	0	0	0	0	0	0	0	0	0	0	0	0	0	0		5
Kenya	0	0	0	0	0	0	0	0	0	0	0	0	0	0	0	0	0	0	0	0	0	0	0	0	0	0	0	0	0	0	0	0	0	0	0	0	0	0	0	0	0		1
Kiribati	0	0	0	0	0	0	0	0	0	0	0	0	0	0	0	0	0	0	0	0	0	0	0	0	0	0	0	0	0	0	0	0	0	0	0	0	0	0	0	0	0		6
Kuwait	0	0	0	0	0	0	0	0	0	0	0	0	0	0	0	0	0	0	0	0	0	0	0	0	0	0	0	0	0	0	0	0	0	0	0	0	0	0	0	0	0		4
Kyrgyzstan	0	0	0	0	0	0	0	0	0	0	0	0	0	0	0	0	0	0	0	0	0	0	0	0	0	0	0	0	0	0	0	0	0	0	0	0	0	0	0	0	0		5
Laos	0	0	0	0	0	0	0	0	0	0	0	0	0	0	0	0	0	0	0	0	0	0	0	0	0	0	0	0	0	0	0	0	0	0	0	0	0	0	0	0	0		6
Latvia	0	0	0	0	0	0	0	0	0	0	0	0	0	0	0	0	0	0	0	0	0	0	0	0	0	0	0	0	0	0	0	0	0	0	0	0	0	0	0	0	0		5
Lebanon	0	0	0	0	0	0	0	0	0	0	0	0	0	0	0	0	0	0	0	0	0	0	0	0	0	0	0	0	0	0	0	0	0	0	0	0	0	0	0	0	0		4
Lesotho	0	0	0	0	0	0	0	0	0	0	0	0	0	0	0	0	0	0	0	0	0	0	0	0	0	0	0	0	0	0	0	0	0	0	0	0	0	0	0	0	0		1
Liberia	179432	176854	174594	173756	175647	180859	191514	206415	223368	239717	253845	262666	268708	273448	278791	285937	295653	285037	273691	260542	245127	224914	202569	178466	152878	125839	97155.5	66716.4	34374.3	0	0	0	0	0	0	0	0	0	0	0	0		1
Libya	0	0	0	0	0	0	0	0	0	0	0	0	0	0	0	0	0	0	0	0	0	0	0	0	0	0	0	0	0	0	0	0	0	0	0	0	0	0	0	0	0		4
Lithuania	0	0	0	0	0	0	0	0	0	0	0	0	0	0	0	0	0	0	0	0	0	0	0	0	0	0	0	0	0	0	0	0	0	0	0	0	0	0	0	0	0		5
Luxembourg	0	0	0	0	0	0	0	0	0	0	0	0	0	0	0	0	0	0	0	0	0	0	0	0	0	0	0	0	0	0	0	0	0	0	0	0	0	0	0	0	0		5
Macedonia	0	0	0	0	0	0	0	0	0	0	0	0	0	0	0	0	0	0	0	0	0	0	0	0	0	0	0	0	0	0	0	0	0	0	0	0	0	0	0	0	0		5
Madagascar	0	0	0	0	0	0	0	0	0	0	0	0	0	0	0	0	0	0	0	0	0	0	0	0	0	0	0	0	0	0	0	0	0	0	0	0	0	0	0	0	0		1
Malawi	94642.9	96692.8	97844	98538.2	99346.5	100634	101899	103863	101859	99817.5	97566.6	95024.8	92330.5	89532.8	86675.5	83752.7	80745	77544.5	74137.4	70522.4	66678.2	60046.4	53103.9	45715.9	37766.5	29219.6	20111.1	10361.4	0	0	0	0	0	0	0	0	0	0	0	0	0		1
Malaysia	0	0	0	0	0	0	0	0	0	0	0	0	0	0	0	0	0	0	0	0	0	0	0	0	0	0	0	0	0	0	0	0	0	0	0	0	0	0	0	0	0		6
Maldives	0	0	0	0	0	0	0	0	0	0	0	0	0	0	0	0	0	0	0	0	0	0	0	0	0	0	0	0	0	0	0	0	0	0	0	0	0	0	0	0	0		3
Mali	160814	163686	150470	136946	122842	107988	91991	75300.1	57839.8	39533.9	20289.1	0	0	0	0	0	0	0	0	0	0	0	0	0	0	0	0	0	0	0	0	0	0	0	0	0	0	0	0	0	0		1
Malta	0	0	0	0	0	0	0	0	0	0	0	0	0	0	0	0	0	0	0	0	0	0	0	0	0	0	0	0	0	0	0	0	0	0	0	0	0	0	0	0	0		5
Mauritania	0	0	0	0	0	0	0	0	0	0	0	0	0	0	0	0	0	0	0	0	0	0	0	0	0	0	0	0	0	0	0	0	0	0	0	0	0	0	0	0	0		1
Mauritius	0	0	0	0	0	0	0	0	0	0	0	0	0	0	0	0	0	0	0	0	0	0	0	0	0	0	0	0	0	0	0	0	0	0	0	0	0	0	0	0	0		1
Mexico	0	0	0	0	0	0	0	0	0	0	0	0	0	0	0	0	0	0	0	0	0	0	0	0	0	0	0	0	0	0	0	0	0	0	0	0	0	0	0	0	0		2
Moldova	0	0	0	0	0	0	0	0	0	0	0	0	0	0	0	0	0	0	0	0	0	0	0	0	0	0	0	0	0	0	0	0	0	0	0	0	0	0	0	0	0		5
Mongolia	0	0	0	0	0	0	0	0	0	0	0	0	0	0	0	0	0	0	0	0	0	0	0	0	0	0	0	0	0	0	0	0	0	0	0	0	0	0	0	0	0		6
Montenegro	0	0	0	0	0	0	0	0	0	0	0	0	0	0	0	0	0	0	0	0	0	0	0	0	0	0	0	0	0	0	0	0	0	0	0	0	0	0	0	0	0		5
Morocco	0	0	0	0	0	0	0	0	0	0	0	0	0	0	0	0	0	0	0	0	0	0	0	0	0	0	0	0	0	0	0	0	0	0	0	0	0	0	0	0	0		4
Mozambique	0	0	0	0	0	0	0	0	0	0	0	0	0	0	0	0	0	0	0	0	0	0	0	0	0	0	0	0	0	0	0	0	0	0	0	0	0	0	0	0	0		1
Myanmar	0	0	0	0	0	0	0	0	0	0	0	0	0	0	0	0	0	0	0	0	0	0	0	0	0	0	0	0	0	0	0	0	0	0	0	0	0	0	0	0	0		3
Namibia	0	0	0	0	0	0	0	0	0	0	0	0	0	0	0	0	0	0	0	0	0	0	0	0	0	0	0	0	0	0	0	0	0	0	0	0	0	0	0	0	0		1
Nepal	0	0	0	0	0	0	0	0	0	0	0	0	0	0	0	0	0	0	0	0	0	0	0	0	0	0	0	0	0	0	0	0	0	0	0	0	0	0	0	0	0		3
Netherlands	0	0	0	0	0	0	0	0	0	0	0	0	0	0	0	0	0	0	0	0	0	0	0	0	0	0	0	0	0	0	0	0	0	0	0	0	0	0	0	0	0		5
New Zealand	0	0	0	0	0	0	0	0	0	0	0	0	0	0	0	0	0	0	0	0	0	0	0	0	0	0	0	0	0	0	0	0	0	0	0	0	0	0	0	0	0		6
Nicaragua	0	0	0	0	0	0	0	0	0	0	0	0	0	0	0	0	0	0	0	0	0	0	0	0	0	0	0	0	0	0	0	0	0	0	0	0	0	0	0	0	0		2
Niger	14048.2	14458.9	13417.3	12314.2	11138.7	9879.75	8472.14	6988.13	5410.85	3726.92	1926.32	0	0	0	0	0	0	0	0	0	0	0	0	0	0	0	0	0	0	0	0	0	0	0	0	0	0	0	0	0	0		1
Nigeria	6.55834e+06	6.73042e+06	6.91197e+06	7.10248e+06	7.30129e+06	7.50762e+06	7.70381e+06	7.90939e+06	8.12285e+06	7.98401e+06	7.83033e+06	7.64549e+06	7.44947e+06	7.24021e+06	7.01609e+06	6.77585e+06	6.51528e+06	6.24099e+06	5.95067e+06	5.64221e+06	5.31399e+06	4.84597e+06	4.35094e+06	3.82763e+06	3.27491e+06	2.691e+06	2.07296e+06	1.42066e+06	730614	0	0	0	0	0	0	0	0	0	0	0	0		1
North Korea	0	0	0	0	0	0	0	0	0	0	0	0	0	0	0	0	0	0	0	0	0	0	0	0	0	0	0	0	0	0	0	0	0	0	0	0	0	0	0	0	0		3
Norway	0	0	0	0	0	0	0	0	0	0	0	0	0	0	0	0	0	0	0	0	0	0	0	0	0	0	0	0	0	0	0	0	0	0	0	0	0	0	0	0	0		5
Oman	0	0	0	0	0	0	0	0	0	0	0	0	0	0	0	0	0	0	0	0	0	0	0	0	0	0	0	0	0	0	0	0	0	0	0	0	0	0	0	0	0		4
Pakistan	0	0	0	0	0	0	0	0	0	0	0	0	0	0	0	0	0	0	0	0	0	0	0	0	0	0	0	0	0	0	0	0	0	0	0	0	0	0	0	0	0		4
Palestine	0	0	0	0	0	0	0	0	0	0	0	0	0	0	0	0	0	0	0	0	0	0	0	0	0	0	0	0	0	0	0	0	0	0	0	0	0	0	0	0	0		4
Panama	0	0	0	0	0	0	0	0	0	0	0	0	0	0	0	0	0	0	0	0	0	0	0	0	0	0	0	0	0	0	0	0	0	0	0	0	0	0	0	0	0		2
Papua New Guinea	0	0	0	0	0	0	0	0	0	0	0	0	0	0	0	0	0	0	0	0	0	0	0	0	0	0	0	0	0	0	0	0	0	0	0	0	0	0	0	0	0		6
Paraguay	0	0	0	0	0	0	0	0	0	0	0	0	0	0	0	0	0	0	0	0	0	0	0	0	0	0	0	0	0	0	0	0	0	0	0	0	0	0	0	0	0		2
Peru	0	0	0	0	0	0	0	0	0	0	0	0	0	0	0	0	0	0	0	0	0	0	0	0	0	0	0	0	0	0	0	0	0	0	0	0	0	0	0	0	0		2
Philippines	0	0	0	0	0	0	0	0	0	0	0	0	0	0	0	0	0	0	0	0	0	0	0	0	0	0	0	0	0	0	0	0	0	0	0	0	0	0	0	0	0		6
Poland	0	0	0	0	0	0	0	0	0	0	0	0	0	0	0	0	0	0	0	0	0	0	0	0	0	0	0	0	0	0	0	0	0	0	0	0	0	0	0	0	0		5
Portugal	0	0	0	0	0	0	0	0	0	0	0	0	0	0	0	0	0	0	0	0	0	0	0	0	0	0	0	0	0	0	0	0	0	0	0	0	0	0	0	0	0		5
Qatar	0	0	0	0	0	0	0	0	0	0	0	0	0	0	0	0	0	0	0	0	0	0	0	0	0	0	0	0	0	0	0	0	0	0	0	0	0	0	0	0	0		4
Romania	0	0	0	0	0	0	0	0	0	0	0	0	0	0	0	0	0	0	0	0	0	0	0	0	0	0	0	0	0	0	0	0	0	0	0	0	0	0	0	0	0		5
Russia	0	0	0	0	0	0	0	0	0	0	0	0	0	0	0	0	0	0	0	0	0	0	0	0	0	0	0	0	0	0	0	0	0	0	0	0	0	0	0	0	0		5
Rwanda	0	0	0	0	0	0	0	0	0	0	0	0	0	0	0	0	0	0	0	0	0	0	0	0	0	0	0	0	0	0	0	0	0	0	0	0	0	0	0	0	0		1
Saint Lucia	0	0	0	0	0	0	0	0	0	0	0	0	0	0	0	0	0	0	0	0	0	0	0	0	0	0	0	0	0	0	0	0	0	0	0	0	0	0	0	0	0		2
Saint Vincent and the Grenadines	0	0	0	0	0	0	0	0	0	0	0	0	0	0	0	0	0	0	0	0	0	0	0	0	0	0	0	0	0	0	0	0	0	0	0	0	0	0	0	0	0		2
Samoa	0	0	0	0	0	0	0	0	0	0	0	0	0	0	0	0	0	0	0	0	0	0	0	0	0	0	0	0	0	0	0	0	0	0	0	0	0	0	0	0	0		6
São Tomé and Príncipe	0	0	0	0	0	0	0	0	0	0	0	0	0	0	0	0	0	0	0	0	0	0	0	0	0	0	0	0	0	0	0	0	0	0	0	0	0	0	0	0	0		1
Saudi Arabia	0	0	0	0	0	0	0	0	0	0	0	0	0	0	0	0	0	0	0	0	0	0	0	0	0	0	0	0	0	0	0	0	0	0	0	0	0	0	0	0	0		4
Senegal	6198.54	6404.9	5964.46	5489.23	4972.25	4410	3788.56	3124.32	2416.02	1661.58	857.579	0	0	0	0	0	0	0	0	0	0	0	0	0	0	0	0	0	0	0	0	0	0	0	0	0	0	0	0	0	0		1
Serbia	0	0	0	0	0	0	0	0	0	0	0	0	0	0	0	0	0	0	0	0	0	0	0	0	0	0	0	0	0	0	0	0	0	0	0	0	0	0	0	0	0		5
Seychelles	0	0	0	0	0	0	0	0	0	0	0	0	0	0	0	0	0	0	0	0	0	0	0	0	0	0	0	0	0	0	0	0	0	0	0	0	0	0	0	0	0		1
Sierra Leone	327143	328179	327190	325273	323707	323322	323614	325503	329517	336234	345805	358847	375786	394803	413734	431273	394520	353283	308650	261542	212295	189870	166412	141888	116230	89327.1	60888	31164.8	0	0	0	0	0	0	0	0	0	0	0	0	0		1
Singapore	0	0	0	0	0	0	0	0	0	0	0	0	0	0	0	0	0	0	0	0	0	0	0	0	0	0	0	0	0	0	0	0	0	0	0	0	0	0	0	0	0		6
Slovakia	0	0	0	0	0	0	0	0	0	0	0	0	0	0	0	0	0	0	0	0	0	0	0	0	0	0	0	0	0	0	0	0	0	0	0	0	0	0	0	0	0		5
Slovenia	0	0	0	0	0	0	0	0	0	0	0	0	0	0	0	0	0	0	0	0	0	0	0	0	0	0	0	0	0	0	0	0	0	0	0	0	0	0	0	0	0		5
Solomon Islands	0	0	0	0	0	0	0	0	0	0	0	0	0	0	0	0	0	0	0	0	0	0	0	0	0	0	0	0	0	0	0	0	0	0	0	0	0	0	0	0	0		6
Somalia	0	0	0	0	0	0	0	0	0	0	0	0	0	0	0	0	0	0	0	0	0	0	0	0	0	0	0	0	0	0	0	0	0	0	0	0	0	0	0	0	0		4
South Africa	0	0	0	0	0	0	0	0	0	0	0	0	0	0	0	0	0	0	0	0	0	0	0	0	0	0	0	0	0	0	0	0	0	0	0	0	0	0	0	0	0		1
South Korea	0	0	0	0	0	0	0	0	0	0	0	0	0	0	0	0	0	0	0	0	0	0	0	0	0	0	0	0	0	0	0	0	0	0	0	0	0	0	0	0	0		6
Spain	0	0	0	0	0	0	0	0	0	0	0	0	0	0	0	0	0	0	0	0	0	0	0	0	0	0	0	0	0	0	0	0	0	0	0	0	0	0	0	0	0		5
Sri Lanka	0	0	0	0	0	0	0	0	0	0	0	0	0	0	0	0	0	0	0	0	0	0	0	0	0	0	0	0	0	0	0	0	0	0	0	0	0	0	0	0	0		3
Sudan	2.75542e+06	2.84116e+06	2.93455e+06	3.03377e+06	3.1366e+06	3.24156e+06	3.33846e+06	3.43907e+06	3.54354e+06	3.65216e+06	3.76546e+06	3.87859e+06	3.99729e+06	4.12202e+06	4.25392e+06	4.39349e+06	4.53217e+06	4.68091e+06	4.83761e+06	4.38758e+06	3.90049e+06	3.52071e+06	3.11185e+06	2.67367e+06	2.20573e+06	1.70649e+06	1.17218e+06	604070	0	0	0	0	0	0	0	0	0	0	0	0	0		4
Suriname	0	0	0	0	0	0	0	0	0	0	0	0	0	0	0	0	0	0	0	0	0	0	0	0	0	0	0	0	0	0	0	0	0	0	0	0	0	0	0	0	0		2
Swaziland	0	0	0	0	0	0	0	0	0	0	0	0	0	0	0	0	0	0	0	0	0	0	0	0	0	0	0	0	0	0	0	0	0	0	0	0	0	0	0	0	0		1
Sweden	0	0	0	0	0	0	0	0	0	0	0	0	0	0	0	0	0	0	0	0	0	0	0	0	0	0	0	0	0	0	0	0	0	0	0	0	0	0	0	0	0		5
Switzerland	0	0	0	0	0	0	0	0	0	0	0	0	0	0	0	0	0	0	0	0	0	0	0	0	0	0	0	0	0	0	0	0	0	0	0	0	0	0	0	0	0		5
Syria	0	0	0	0	0	0	0	0	0	0	0	0	0	0	0	0	0	0	0	0	0	0	0	0	0	0	0	0	0	0	0	0	0	0	0	0	0	0	0	0	0		4
Tajikistan	0	0	0	0	0	0	0	0	0	0	0	0	0	0	0	0	0	0	0	0	0	0	0	0	0	0	0	0	0	0	0	0	0	0	0	0	0	0	0	0	0		5
Tanzania	660678	682643	706755	732199	757959	783467	805553	827270	849067	835797	821621	804892	787151	768349	748416	727221	704153	679847	654017	626455	596996	546465	492931	435847	374748	309340	239388	164648	84943.4	0	0	0	0	0	0	0	0	0	0	0	0		1
Thailand	0	0	0	0	0	0	0	0	0	0	0	0	0	0	0	0	0	0	0	0	0	0	0	0	0	0	0	0	0	0	0	0	0	0	0	0	0	0	0	0	0		3
The Bahamas	0	0	0	0	0	0	0	0	0	0	0	0	0	0	0	0	0	0	0	0	0	0	0	0	0	0	0	0	0	0	0	0	0	0	0	0	0	0	0	0	0		2
The Gambia	0	0	0	0	0	0	0	0	0	0	0	0	0	0	0	0	0	0	0	0	0	0	0	0	0	0	0	0	0	0	0	0	0	0	0	0	0	0	0	0	0		1
Timor-Leste	0	0	0	0	0	0	0	0	0	0	0	0	0	0	0	0	0	0	0	0	0	0	0	0	0	0	0	0	0	0	0	0	0	0	0	0	0	0	0	0	0		3
Togo	81629.2	84030.4	82268.4	80356.5	78266.6	75982.6	73446.4	70696.7	67723.1	64514	61050.3	57273.4	53217.7	48863.1	44190.2	39182.5	33794.5	28074.8	22001.6	15555.9	8724.51	7844.57	6907.48	5912.24	4858.2	3743.19	2562.84	1316.81	0	0	0	0	0	0	0	0	0	0	0	0	0		1
Tonga	0	0	0	0	0	0	0	0	0	0	0	0	0	0	0	0	0	0	0	0	0	0	0	0	0	0	0	0	0	0	0	0	0	0	0	0	0	0	0	0	0		6
Trinidad and Tobago	0	0	0	0	0	0	0	0	0	0	0	0	0	0	0	0	0	0	0	0	0	0	0	0	0	0	0	0	0	0	0	0	0	0	0	0	0	0	0	0	0		2
Tunisia	0	0	0	0	0	0	0	0	0	0	0	0	0	0	0	0	0	0	0	0	0	0	0	0	0	0	0	0	0	0	0	0	0	0	0	0	0	0	0	0	0		4
Turkey	0	0	0	0	0	0	0	0	0	0	0	0	0	0	0	0	0	0	0	0	0	0	0	0	0	0	0	0	0	0	0	0	0	0	0	0	0	0	0	0	0		5
Turkmenistan	0	0	0	0	0	0	0	0	0	0	0	0	0	0	0	0	0	0	0	0	0	0	0	0	0	0	0	0	0	0	0	0	0	0	0	0	0	0	0	0	0		5
Uganda	370341	381517	393090	405050	417436	430305	441754	453919	466866	480643	470914	460234	448887	436729	423666	409567	393817	376908	358602	338664	316922	291996	264953	235596	203741	169192	131603	91021.9	47227.5	0	0	0	0	0	0	0	0	0	0	0	0		1
Ukraine	0	0	0	0	0	0	0	0	0	0	0	0	0	0	0	0	0	0	0	0	0	0	0	0	0	0	0	0	0	0	0	0	0	0	0	0	0	0	0	0	0		5
United Arab Emirates	0	0	0	0	0	0	0	0	0	0	0	0	0	0	0	0	0	0	0	0	0	0	0	0	0	0	0	0	0	0	0	0	0	0	0	0	0	0	0	0	0		4
United Kingdom	0	0	0	0	0	0	0	0	0	0	0	0	0	0	0	0	0	0	0	0	0	0	0	0	0	0	0	0	0	0	0	0	0	0	0	0	0	0	0	0	0		5
United States	0	0	0	0	0	0	0	0	0	0	0	0	0	0	0	0	0	0	0	0	0	0	0	0	0	0	0	0	0	0	0	0	0	0	0	0	0	0	0	0	0		2
Uruguay	0	0	0	0	0	0	0	0	0	0	0	0	0	0	0	0	0	0	0	0	0	0	0	0	0	0	0	0	0	0	0	0	0	0	0	0	0	0	0	0	0		2
Uzbekistan	0	0	0	0	0	0	0	0	0	0	0	0	0	0	0	0	0	0	0	0	0	0	0	0	0	0	0	0	0	0	0	0	0	0	0	0	0	0	0	0	0		5
Vanuatu	0	0	0	0	0	0	0	0	0	0	0	0	0	0	0	0	0	0	0	0	0	0	0	0	0	0	0	0	0	0	0	0	0	0	0	0	0	0	0	0	0		6
Venezuela	0	0	0	0	0	0	0	0	0	0	0	0	0	0	0	0	0	0	0	0	0	0	0	0	0	0	0	0	0	0	0	0	0	0	0	0	0	0	0	0	0		2
Vietnam	0	0	0	0	0	0	0	0	0	0	0	0	0	0	0	0	0	0	0	0	0	0	0	0	0	0	0	0	0	0	0	0	0	0	0	0	0	0	0	0	0		6
Yemen	0	0	0	0	0	0	0	0	0	0	0	0	0	0	0	0	0	0	0	0	0	0	0	0	0	0	0	0	0	0	0	0	0	0	0	0	0	0	0	0	0		4
Zambia	0	0	0	0	0	0	0	0	0	0	0	0	0	0	0	0	0	0	0	0	0	0	0	0	0	0	0	0	0	0	0	0	0	0	0	0	0	0	0	0	0		1
Zimbabwe	0	0	0	0	0	0	0	0	0	0	0	0	0	0	0	0	0	0	0	0	0	0	0	0	0	0	0	0	0	0	0	0	0	0	0	0	0	0	0	0	0		1
[truncated: 40 more columns]
