# Supplementary material
Source: publisher figshare collection journal article supplement (https://plos.figshare.com/articles/dataset/_/5978128)
Supplement: Supplementary file 1 [file 1 › S4 Table.pdf]

## S7 Publications reporting productivity loss for Visceral Leishmaniasis

| Author          | Year | Country                                 | Study design  | Population                                                        | Sample size | Sequela | Definition of productivity loss                                                                                                                                                                                        | Productivity loss                                                                                                                                  |
|-----------------|------|-----------------------------------------|---------------|-------------------------------------------------------------------|-------------|---------|------------------------------------------------------------------------------------------------------------------------------------------------------------------------------------------------------------------------|----------------------------------------------------------------------------------------------------------------------------------------------------|
| Adhikari et al. | 2005 | Nepal (Danusha and Mahottari districts) | Observational | Economically active age group (15-59 years) and children below 15 | 18          | VL      | a. Days lost by patients & caregivers (incl. school days lost)<br>b. Days lost by patients (including school days lost)<br>c. Days lost by children and caregivers<br>d. Days lost by children<br>e. Opportunity costs | a. 178 days<br>b. 117 days<br>c. 67 days<br>d. 62 days<br>e. 8913.50 Rs                                                                            |
| Adhikari et al. | 2009 | Nepal (Siraha and Saptari)              | Observational | KA patients                                                       | 61          | VL      | Total indirect costs of an episode of KA treatment                                                                                                                                                                     | 10910 (mean) 7800 (median)                                                                                                                         |
| Adhikari et al. | 2010 | Nepal                                   | CBA           | n/a                                                               | n/a         | VL      | a. Total opportunity cost of household (from Adhikari et al. 2009)<br>b. Productivity gains from KA interventions                                                                                                      | a. 11000 Nepalese rupees<br>b. 26484 million Nepalese rupees (40% of total benefits)                                                               |
| Meheus et al.   | 2006 | India (Bihar)                           | Observational | VL patients (including inpatients)                                | 77          | VL      | a. Total indirect costs<br>b. Income loss (patient)<br>c. Income loss (attendant)<br>d. Monthly interest on loans<br>e. Days absent from school<br>f. Duration of illness                                              | a. 5500 (median, rupees)<br>b. 4400 (median, rupees)<br>c. 900 (median, rupees)<br>d. 200<br>e. 67 days (25% were students)<br>f. 70 days (median) |

|                 |      |                     |               |                                                    |                                         |      |                                                                                                                                                                                                                                            |                                                                                                                           |
|-----------------|------|---------------------|---------------|----------------------------------------------------|-----------------------------------------|------|--------------------------------------------------------------------------------------------------------------------------------------------------------------------------------------------------------------------------------------------|---------------------------------------------------------------------------------------------------------------------------|
| Meheus et al.   | 2010 | Indian subcontinent | CEA           | n/a                                                | n/a                                     | VL   | a. Productivity loss during VL treatment<br>b. Income loss during VL treatment                                                                                                                                                             | a. Assumed 100% productivity loss<br>b. Assumed an income loss of 1.48 US\$/day.                                          |
| Meheus et al.   | 2013 | Sudan               | Observational | Patients from two hospitals                        | 75 (incl 45 under 15)                   | VL   | a. Working days lost during a VL episode (patients)<br>b. Working days lost during a VL episode (caregivers)<br>c. Income loss, working individuals (n=22)<br>d. Income loss, all patients (n=75)<br>e. Income loss, all caregivers (n=99) | a. 51 (median)<br>b. 39 (median)(from 20/99 caregivers)<br>c. 101 US\$ (median)<br>d. 41 US\$ (mean)<br>e. 44 US\$ (mean) |
| Ozaki et al.    | 2011 | Bangladesh          | Observational | Past and current patients with PKDL <sub>2,3</sub> | 134 (56 patients treated, 78 untreated) | PKDL | a. Missed work days per PKDL treatment course<br>b. Missed work days per PKDL treatment (patients, caregivers)                                                                                                                             | a. 43 (median)<br>b. 123 (median)                                                                                         |
| Sarnoff et al.  | 2010 | India (Bihar)       | Observational | Households (HH) with a member currently with VL    | 194 HHs, 227 persons                    | VL   | a. Annual number of working days lost<br>b. Annual income loss<br>c. Restricted daily activities                                                                                                                                           | a. 120 days (amongst the 36% who worked)<br>b. 146 US\$ (median)<br>c. 30 days (average) (all patients)                   |
| Sharma et al.   | 2006 | Bangladesh          | Observational | VL patients                                        | 113                                     | VL   | Income loss during VL episode                                                                                                                                                                                                              | 40 US\$ (median)                                                                                                          |
| Shreshta et al. | 2008 | Nepal (Kathmandu)   | Observational | VL patients                                        | 60                                      | VL   | Working days lost due to the disease                                                                                                                                                                                                       | 100 (average, min 14 max 210)                                                                                             |

|               |      |               |               |                                    |                       |    |                                                                                                                                                                             |                                                                                                                                  |
|---------------|------|---------------|---------------|------------------------------------|-----------------------|----|-----------------------------------------------------------------------------------------------------------------------------------------------------------------------------|----------------------------------------------------------------------------------------------------------------------------------|
| Sundar et al. | 2010 | India (Bihar) | Observational | Patients who received VL treatment | 183 patients, 171 HHs | KA | a. Duration of illness (symptoms to cure)<br>b. Monthly work loss after illness<br>c. Monthly work loss during illness<br>d. Median time loss during illness (the 15 weeks) | a. 15 weeks (median)<br>b. 1.08 weeks (before 4.29 weeks/month after illness 3.21 weeks/month)<br>c. 2.14 weeks/month<br>d. 2.14 |
|---------------|------|---------------|---------------|------------------------------------|-----------------------|----|-----------------------------------------------------------------------------------------------------------------------------------------------------------------------------|----------------------------------------------------------------------------------------------------------------------------------|
