# Supplementary material
Source: publisher figshare collection journal article supplement (https://plos.figshare.com/articles/dataset/_/5978128)
Supplement: Supplementary file 1 [file 1 › S5 Table.pdf]

## S8 Publications reporting Out-of-Pocket Payments for Chagas disease

| Author                   | Year | Country   | Study design                                     | Population                                                                             | Sample size                        | Sequela                                                                          | Definition of costs                                                                                                                                                                                                                                                                                                                                       | OPPs                                                                                                                                               |
|--------------------------|------|-----------|--------------------------------------------------|----------------------------------------------------------------------------------------|------------------------------------|----------------------------------------------------------------------------------|-----------------------------------------------------------------------------------------------------------------------------------------------------------------------------------------------------------------------------------------------------------------------------------------------------------------------------------------------------------|----------------------------------------------------------------------------------------------------------------------------------------------------|
| Abuhab et al.            | 2013 | Brazil    | prospective trial                                | adult patients high complexity cardiology university hospital in the city of São Paulo | 58 Chagas and 519 other etiologies | Severe heart failure                                                             | costs of units spent during admission by each patient, including all fixed and variable costs of care at local costs, given the institutional division within which care was given. That methodology was used for accounting supplies (pharmacy, blood bank, and disposable material), procedures and surgeries, and diagnostic tests (imaging and blood) | mean cost per day US\$ 467 (323–815)                                                                                                               |
| Arata et al.             | 1994 | Bolivia   | report                                           | NA                                                                                     | NA                                 | a. acute<br>b. chronic heart disease<br>c. heart failure<br>d. digestive disease | annual costs of medical attention during the acute and the chronic phases and for some aspects of congenital Chagas                                                                                                                                                                                                                                       | a. average cost about 100 Bolivianos<br>b. overall average: 200 Bolivianos<br>c. Severe cardiac cases: up to US\$ 4000<br>d. 300 to 500 Bolivianos |
| Basombrío et al.         | 1998 | Argentina | Cost-benefit analysis                            | population of the department of Anta, province of Salta                                | 39 213                             | a. acute<br>b. chronic heart disease<br>c. heart failure<br>d. digestive disease | annual costs based on market prices and official standard fees for examination and basic treatment of patients.                                                                                                                                                                                                                                           | a. US\$ 591.8 b and<br>c. US\$ 603.62 d.<br>US\$ 736.15                                                                                            |
| Castillo-Riquelme et al. | 2008 | Colombia  | Cost of illness, with Delphi consensus estimates | Chagas patients from                                                                   | 63                                 | b. chronic heart disease<br>c. heart failure<br>d. digestive disease             | Services consumed by the patients grouped into ambulatory care, visits to emergency services, in-patient bed-days, clinical and other diagnostic investigations or procedures, surgical procedures, and other medical procedures (e.g. rehabilitation if applicable). Basic, intermediate and high level of care.                                         | b. basic US\$46.4, intermediate US\$ 188, high level care US\$ 3651.5<br>c. basic US\$ 51.4, intermediate US\$ 259.3, high level care US\$ 7980.9  |

|                          |      |               |                                     |                                                                             |                  |                                                                      |                                                                                                                   |                                                                                                                                     |
|--------------------------|------|---------------|-------------------------------------|-----------------------------------------------------------------------------|------------------|----------------------------------------------------------------------|-------------------------------------------------------------------------------------------------------------------|-------------------------------------------------------------------------------------------------------------------------------------|
| Castillo-Riquelme et al. | 2013 | Chile         | Cost-effectiveness analysis (model) | discharges between 2005 and 2009 with ICD-10 of chronic Chagas disease      | 49               | b. chronic heart disease<br>c. heart failure<br>d. digestive disease | public annual costs and prices reported by the study of verification costs 2009 Chilean pesos June 2009           | b. \$6730 (pesos chilenos)<br>c. \$470670 (pesos chilenos)<br>d. \$733230 (pesos chilenos)                                          |
| Lee et al.               | 2013 | Latin America | simulation model (Markov)           | NA                                                                          | 1000 individuals | not specified                                                        | Annual health care cost with an individual with T. cruzi infection                                                | US\$ 2600 (\$1966 - 3034)                                                                                                           |
| Medici et al.            | 2001 | Bolivia       | report                              | children under 5 years old, pregnant women and births in the infected areas | NR               | acute                                                                | annual treatment for the target population                                                                        | US\$ 31                                                                                                                             |
| Moncayo et al.           | 1999 | Latin America | report                              | NA                                                                          | NA               | not specified                                                        | Direct costs due to ambulatory medical care per patient per year in the countries of the Southern Cone Initiative | Argentina US\$ 406<br>Brazil US\$1,250<br>Bolivia US\$227<br>Uruguay US\$ 877<br>Weighted average cost six countries US\$ 559       |
| PAHO                     | 1997 | Chile         | report                              | NA                                                                          | NA               | a. chronic heart disease<br>b. heart failure                         | Annual costs of treatment chronic chagasic cardiomyopathy                                                         | consultation US\$ 411.5 - 549.5<br>Hospitalization US\$ 170 (average 20 days)<br>Drugs US\$ 168 - 906<br>Laboratory tests US\$ 48.5 |
| PAHO and others          | 2010 | Latin America | report                              | NA                                                                          | NA               | acute                                                                | Costs of Benzonidazol treatment                                                                                   | US\$ 10                                                                                                                             |

|                  |      |                                                             |                                     |    |                                     |                                                                                  |                                                                                                                                                                    |                                                                                                                                                                                                                                              |
|------------------|------|-------------------------------------------------------------|-------------------------------------|----|-------------------------------------|----------------------------------------------------------------------------------|--------------------------------------------------------------------------------------------------------------------------------------------------------------------|----------------------------------------------------------------------------------------------------------------------------------------------------------------------------------------------------------------------------------------------|
| Ramsey et al.    | 2014 | Mexico                                                      | Markov decision model               | NA | One million patients were simulated | a. acute<br>b. chronic heart disease<br>c. heart failure<br>d. digestive disease | Direct medical costs for CD include those for hospitalization, outpatient consultations, laboratory tests, annual screening, clinical procedures, and medications. | consultation/hospital/drugs/lab tests<br>a. US\$ 17/6.5/61.2/12.4<br>b. US\$ 98.1/21.4/162.8/36+25.4<br>c. US\$ 481.2/151.2/162.8/254.4+179.9<br>d. US\$ 296.6/93.2/162.8/156.8+110.9                                                        |
| Remme et al.     | 2006 | Brasil and Argentina                                        | book                                | NA | NA                                  | not specified                                                                    | Annual costs of consultations, care, and supportive treatment for chronic chagasic patients                                                                        | US\$ 1000                                                                                                                                                                                                                                    |
| Schofield et al. | 1991 | Argentina, Brazil, Boilivia, Chile, Paraguay, Peru, Uruguay | Cost-benefit analysis (model)       | NA | NA                                  | b. chronic heart disease<br>c. heart failure<br>d. digestive disease             | Average cost of consultation, care and supportive treatment for chrinic Chagas disease patients                                                                    | c/d. hospitalization US\$ 30.00 per patient per day (average of 25 days/year)<br>c. US\$ 2500 for pacemaker<br>d. US\$ 1750 grade III megaesophagus or mega-colon corrective surgery<br>c. US\$185.00/year antiarrrhythmic drug (amiodarone) |
| Wilson et al.    | 2005 | Latin America                                               | Cost-effectiveness analysis (model) | NA | NA                                  | a. acute<br>b. chronic heart disease<br>c. heart failure<br>d. digestive disease | annual costs from diagnosis and supportive treatment according to the type and severity                                                                            | a. US\$ 486<br>b. US\$ 250<br>c. US\$ 350.42<br>d.US\$ 250                                                                                                                                                                                   |
