# Supplementary material
Source: publisher figshare collection journal article supplement (https://plos.figshare.com/articles/dataset/_/5978128)
Supplement: Supplementary file 1 [file 1 › S6 Table.pdf]

## S9 Publications reporting Out-of-Pocket Payments for Visceral Leishmaniasis

| Author            | Year | Country | Study design                                                             | Population                                                                    | Sample size | Sequela       | Defenition of costs                                                                                                                                                                                                                                                                                                                                                                                                                                                                                                                                                       | Direct Costs                                                                                                                                                                                                    |
|-------------------|------|---------|--------------------------------------------------------------------------|-------------------------------------------------------------------------------|-------------|---------------|---------------------------------------------------------------------------------------------------------------------------------------------------------------------------------------------------------------------------------------------------------------------------------------------------------------------------------------------------------------------------------------------------------------------------------------------------------------------------------------------------------------------------------------------------------------------------|-----------------------------------------------------------------------------------------------------------------------------------------------------------------------------------------------------------------|
| Meheus et al.     | 2013 | Sudan   | survey                                                                   | patients 2 hospitals                                                          | 75          | VL            | <p>a. <i>Direct medical costs in health-seeking phase</i> of VL episode (consultation, drugs, laboratory investigations)</p> <p>b. <i>Direct non medical costs in healthseeking phase of VL episode</i> (transportation, food and other)</p><br><p>a. <i>Direct medical costs of admission and treatment of VL episode</i></p> <p>b. <i>Direct non-medical of admission and treatment of VL episode</i>; 85% caused by food costs of pt caretakers in the hospital</p><br><p>Total median direct expenditure by hh (incl health seeking phase and treatment facility)</p> | <p>a. 24.2 US\$ (median), 45,9 US\$ (mean)</p> <p>b. 2,6 US\$ (median), 15 US\$ (mean)</p><br><p>a. 14 US\$ (median), 18,5 US\$ (mean)</p> <p>b. 126,5 US\$ (median) and 133 US\$ (mean)</p><br><p>185 US\$</p> |
| Griekspoor et al. | 1999 | Sudan   | Cost-effectiveness analysis and case study                               | Patients with VL                                                              | 3067        | VL            | a. Costs per patient for recommended treament (pentavalent antimonium salt)                                                                                                                                                                                                                                                                                                                                                                                                                                                                                               | a. 100 US\$ (on average)                                                                                                                                                                                        |
| Mannocci et al.   | 2007 | Italy   | Observarional (accessed hospital discharge data and mean length of stay) | patients with Leishmaniasis and Visceral Leishmaniasis who visited a hospital | N.A.        | Leishmaniasis | Total hospitalisation costs for Leishmaniasis (ordinary hospitalization 3343,54 and daily hospitalization 329,50 multiplied with the respective number of discharges and added ordinary hospital costs to day-hospital ones)                                                                                                                                                                                                                                                                                                                                              | a. 7,497,579.20 Euros (1,561,218.50 + 1,637,256.40 + 1,459,892.90 +1,468,983.60 + 1,370,227.80 for years 1999-2003)                                                                                             |

|                  |      |                             |                                                      |                                                                                                                                  |                                        |      |                                                                                                                                                                                                                                                                                            |                                                                                                                |
|------------------|------|-----------------------------|------------------------------------------------------|----------------------------------------------------------------------------------------------------------------------------------|----------------------------------------|------|--------------------------------------------------------------------------------------------------------------------------------------------------------------------------------------------------------------------------------------------------------------------------------------------|----------------------------------------------------------------------------------------------------------------|
| Ozaki et al.     | 2011 | Bangladesh                  | Observational (structured questionnaires)            | Past and current patients with PKDL                                                                                              | 134 (55 patient treated, 78 untreated) | PKDL | a. total direct costs per treated patient because of treatment with SAG (incl. diagnosis, provider fee, test, treatment, SAG, other medication, Syringe, informal payments to provider, transportation, miscellaneous, special food)<br>b. total direct costs per untreated patient (n=78) | a. 179 US\$ (median) 218 (mean)<br>b. no direct expenditures                                                   |
| Sharma et al.    | 2006 | Bangladesh                  | Observational (structured questionnaires)            | Patients with VL in two villages in Mymensingh District (the most highly endemic district in Bangladesh)                         | 113 VL patients                        | VL   | Total direct costs for care for a VL patient (incl. Provider, SAG, informal payments miscellaneous costs)                                                                                                                                                                                  | 87 US\$ (median)                                                                                               |
| Ahluwalia et al. | 2003 | Bangladesh (Fulbaria Thana) | Observational (focus group discussions, qualitative) | Patients with VL                                                                                                                 |                                        | VL   | Amount of money needed for diagnosis and treatment                                                                                                                                                                                                                                         | 85-500 \$                                                                                                      |
| Sarnoff et al.   | 2010 | India (Bihar)               | Observation (household survey)                       | Sample of households from 80 villagesn. Households were included if any of the household members was currently suffering from VL | 194 households, 227 individuals        | VL   | a. Direct and indirect costs prior to VL diagnosis (incl. treatments, transport, lodging)<br>b. Direct and indirect costs of VL treatment per VL episode (incl. VL test, treatment, transport lodging)<br>c. Additional expenses<br>d. median total treatment expenses                     | a. 18 US\$ (median)<br>b. 85 US\$ (median)<br>c. 101 US\$ (median)<br>d. 131 per patient and 148 per household |

|               |      |                                                |                                                                         |      |                                           |    |                                                                                                                                                                                                                                                                                                                                              |                                                                                                                                                                                                                                                                                                                                                                       |
|---------------|------|------------------------------------------------|-------------------------------------------------------------------------|------|-------------------------------------------|----|----------------------------------------------------------------------------------------------------------------------------------------------------------------------------------------------------------------------------------------------------------------------------------------------------------------------------------------------|-----------------------------------------------------------------------------------------------------------------------------------------------------------------------------------------------------------------------------------------------------------------------------------------------------------------------------------------------------------------------|
| Meheus et al. | 2010 | Indian subcontinent (India, Nepal, Bangladesh) | Cost-effectiveness analysis                                             | N.A. | N.A.                                      | VL | <p>Drug costs', 'other direct medical' (incl contraceptives, administration, laboratory, inpatient bad-days) &amp; 'nonmedical &amp; indirect costs' of alternative strategies for VL per patient:</p> <p>a. L-AmB+MF<br/>b. L-AmB+PM<br/>c. MF+PM<br/>d. SSG+PM<br/>e. MF<br/>f. PM<br/>g. AmB<br/>h. L-AmB10<br/>i. L-AmB20<br/>J. SSG</p> | <p>a. 95.7; 14.8; 12.8 US\$ (2008)<br/>b. 87.1; 20.5; 25.3 US\$ (2008)<br/>c. 29.5; 19.5; 23.8 US\$ (2008)<br/>d. 45.1; 29.9; 43.6 US\$ (2008)<br/>e. 62.8; 22.0; 45.4 US\$ (2008)<br/>f. 14.9; 30.6; 51.1 US\$ (2008)<br/>g. 20.9; 131.6; 45.4 US\$ (2008)<br/>h. 140; 11; 2.5 US\$ (2008)<br/>i. 280; 24.7; 6.9 US\$ (2008)<br/>j. 57.8; 40.7; 73.4 US\$ (2008)</p> |
| Meheus et al. | 2006 | India (Bihar)                                  | Observational (Structured questionnaires and data from medical records) |      | 77 patients (27 follow up, 50 inpatients) | VL | <p>Out of pocket expenditures over the length of hospitalisation</p> <p>a. Total<br/>b. Medical costs (consultation, accommodation, investigations, medicines, medical supplies)<br/>c. Non-medical (transport, food)</p> <p>Prior to admission</p> <p>a. Total<br/>B. Medical cost<br/>c. Non-medical</p>                                   | <p>a. 3920 rupees (median)<br/>b. 2510 rupees (median)<br/>c. 1410 rupees (median)</p> <p>a. 1220<br/>b. 1090<br/>c. 120</p>                                                                                                                                                                                                                                          |

|                  |                                       |                                         |                                                                             |                                                                              |                              |    |                                                                                                                                                              |                                                                             |
|------------------|---------------------------------------|-----------------------------------------|-----------------------------------------------------------------------------|------------------------------------------------------------------------------|------------------------------|----|--------------------------------------------------------------------------------------------------------------------------------------------------------------|-----------------------------------------------------------------------------|
| Sundar et al.    | 2010                                  | India (Bihar)                           | Observational, semi-structured questionnaire                                | patients who received VL treatment between september 2005 and september 2006 | 183 patients, 171 households | KA | a. Direct cost (incl. Provider, medicines, diagnostic, hospitalization)<br>b. Indirect (incl. Travel/food)<br>c. Total costs per patient (direct + indirect) | a. 83 US\$ (median)<br>b. 33 US\$ (median)<br>c. 127 US\$ (median)          |
| Olliaro et al.   | 2009                                  | India (Bihar)                           | Cost-effectiveness analysis                                                 |                                                                              |                              | VL | Costs of care and drug costs available for different treatment strategies (table 2 and 3) but health care perspective                                        |                                                                             |
| Adhikari et al.  | 2010                                  | Nepal                                   | Cost benefit analysis (discounted net benefits and internal rate of return) | N.A.                                                                         | N.A.                         | VL | a. Average total direct costs (but based on other Adhikari et al. 2009)<br>b. Household savings of KA interventions                                          | a. 7076 Nepalese Rupees<br>b. 14927 Nepalese Rupees (23% of total benefits) |
| Shretstah et al. | only abstract for poster presentation | Nepal (Kathmandu)                       | Observational                                                               | VL patients                                                                  | 60                           | VL | Working days lost due to the disease                                                                                                                         | 100 (average, min 14 max 210)                                               |
| Adhikari et al.  | 2009                                  | Nepal (Siraha and Saptari)              | Observational (questionnaires)                                              | KA patients                                                                  | 61                           | VL | Total direct costs of an episode of KA treatment (including medical costs 66,5%, food (22,6%), travel (8,9%) and other costs (1,9%))                         | 7076 Nepalese Rupees (average) 4805 (median)                                |
| Sharma et al.    | 2004                                  | Nepal (Saptari and Siraha)              | Observational (structured questionnaires and focus group discussions)       | KA patients                                                                  | 61 households                | VL | Direct costs of treatment for one episode of KA, from the inception of the symptom to recovery (incl. Medical, transportation, food and other costs)         | 7076,23 Nepalese Rupees (average)                                           |
| Adhikari et al.  | 2005                                  | Nepal (Danusha and Mahottari districts) | Observational (structured questionnaires)                                   | VL patients                                                                  | 18 patients                  | VL | Direct costs of a KA episode (incl. Medical costs (57%), food expenses (28%), transportation costs (5,4%), other costs (9,5%))                               | 6853 Nepalese Rupees (average)                                              |
